# Supplementary material for: Photoprotective responses of three intertidal Antarctic macroalgae to short-term temperature stress
Source: Frontiers journal article supplement (doi:10.3389/fmars.2023.1223853), 2023-10-25
Supplement: Data_Sheet_1.zip [file Muestra2_HPLC-UV.pdf › Carotenoids/Muestra2_HPLC-UV.pdf]

RT: 0.00 - 61.20

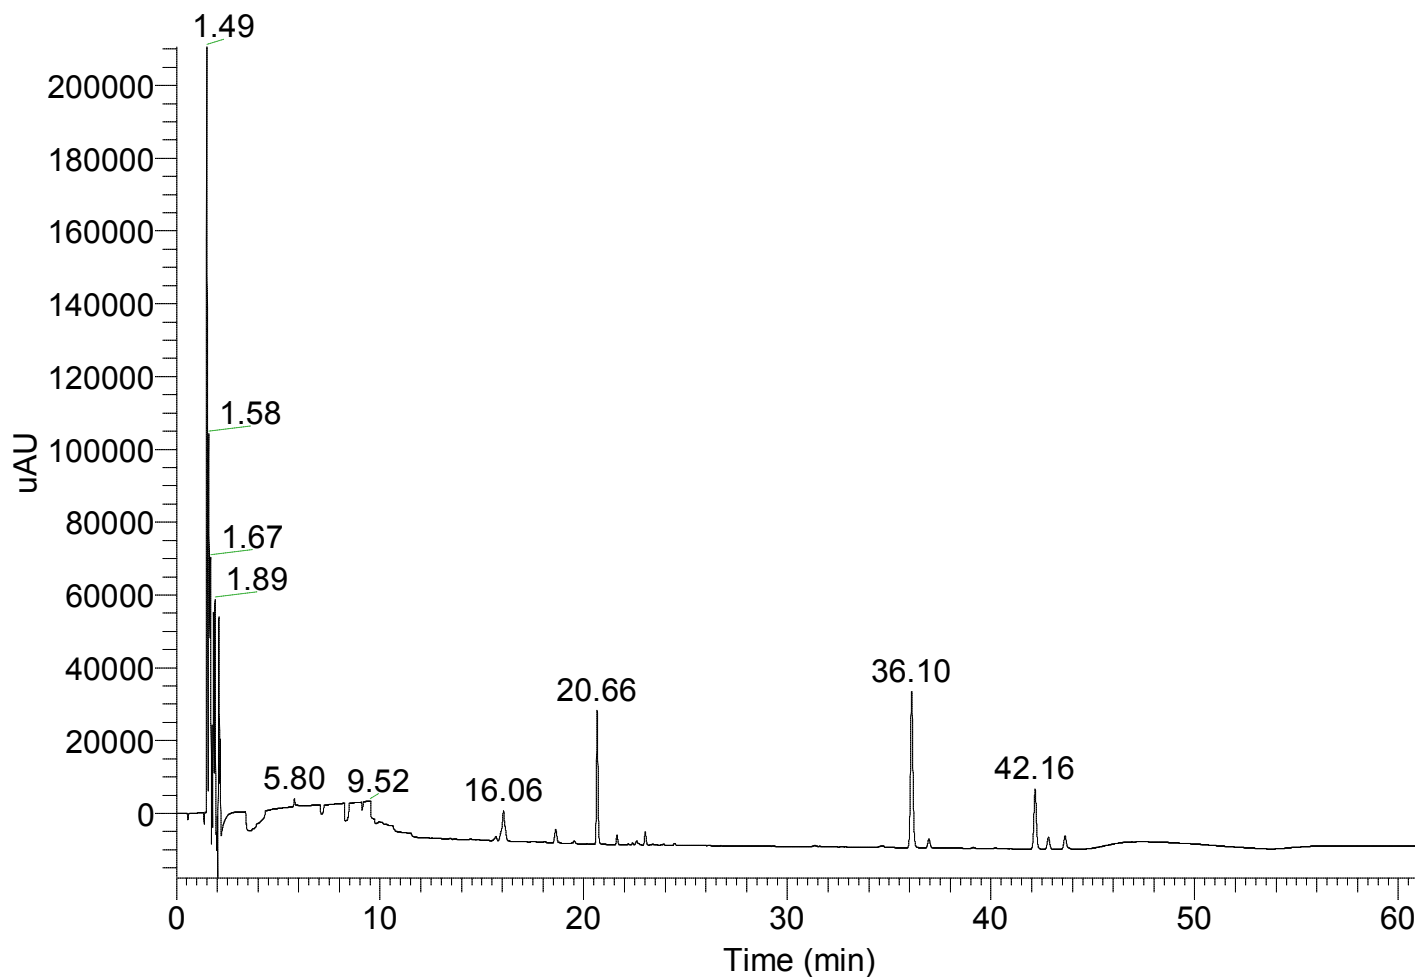

NL:  
2.10E5  
Total Scan  
PDA  
Muestra2re  
p

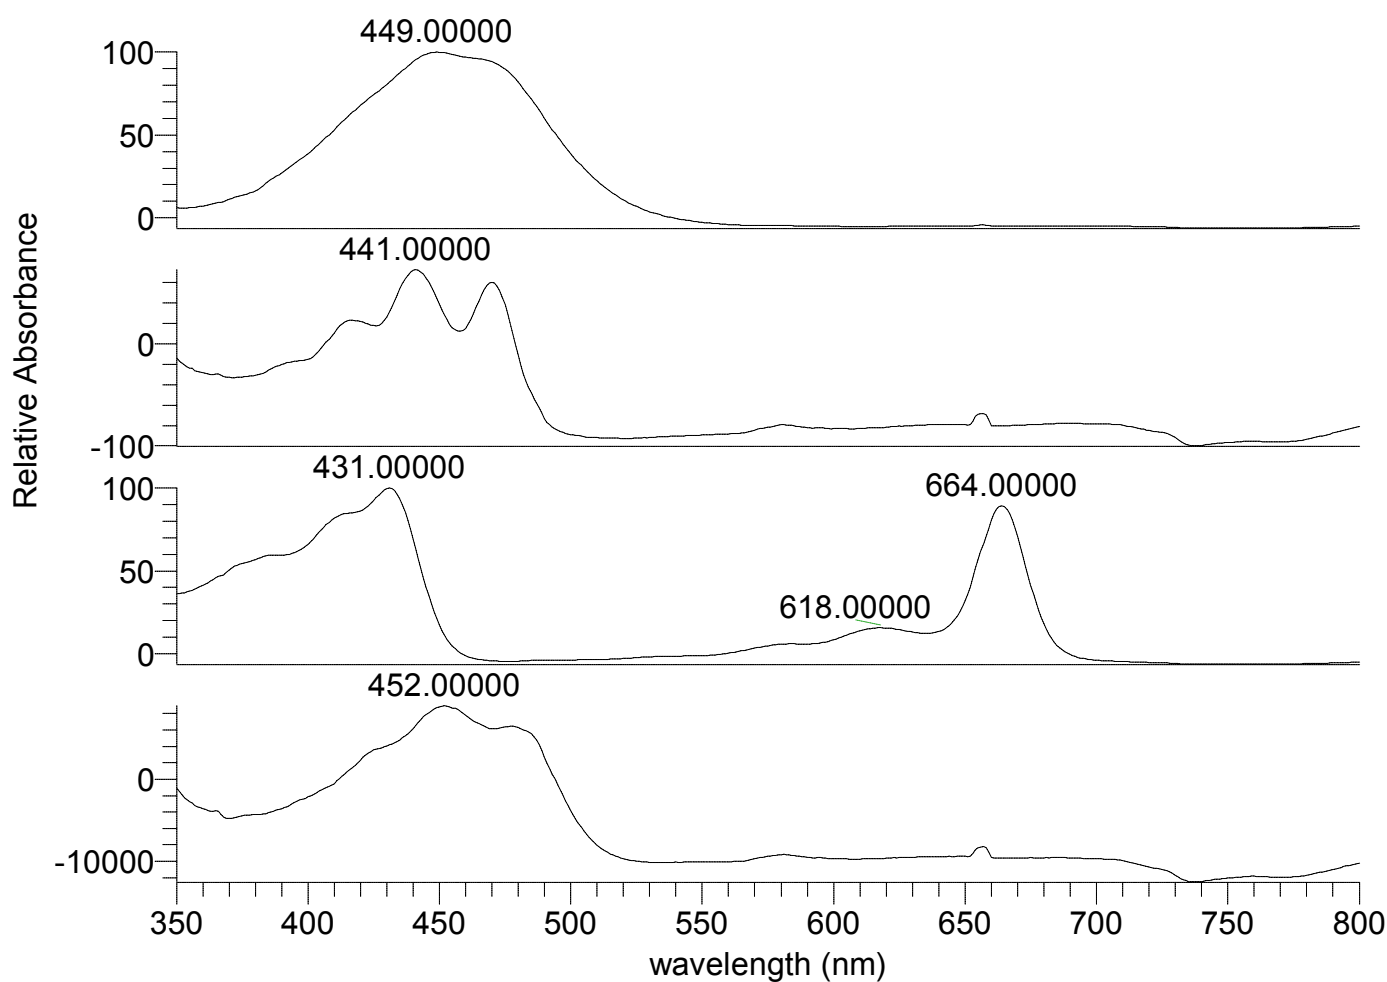

NL:  
1.61E5  
Muestra2rep#  
6199 RT:  
20.66 AV: 1

NL:  
1.04E4  
Muestra2rep#  
6489 RT:  
21.63 AV: 1

NL:  
1.80E5  
Muestra2rep#  
10831 RT:  
36.10 AV: 1

NL:  
1.25E4  
Muestra2rep#  
13092 RT:  
43.64 AV: 1
