# Supplementary material for: Photoprotective responses of three intertidal Antarctic macroalgae to short-term temperature stress
Source: Frontiers journal article supplement (doi:10.3389/fmars.2023.1223853), 2023-10-25
Supplement: Data_Sheet_1.zip [file Muestra5_HPLC-UV.pdf › Carotenoids/Muestra5_HPLC-UV.pdf]

RT: 16.56 - 48.74

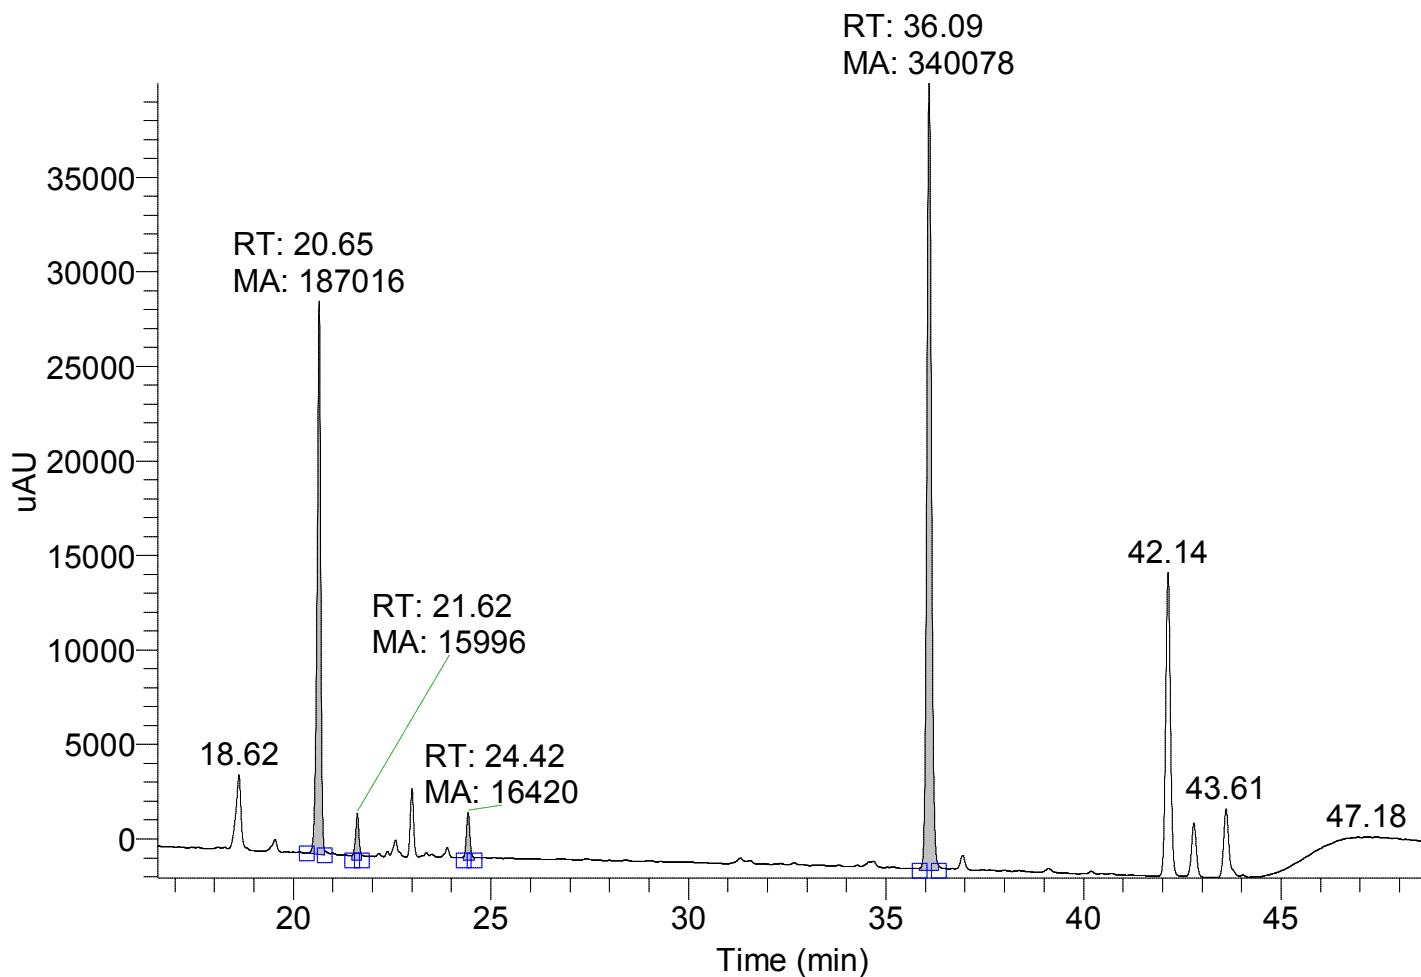

NL:  
4.00E4  
Total Scan  
PDA  
Muestra5

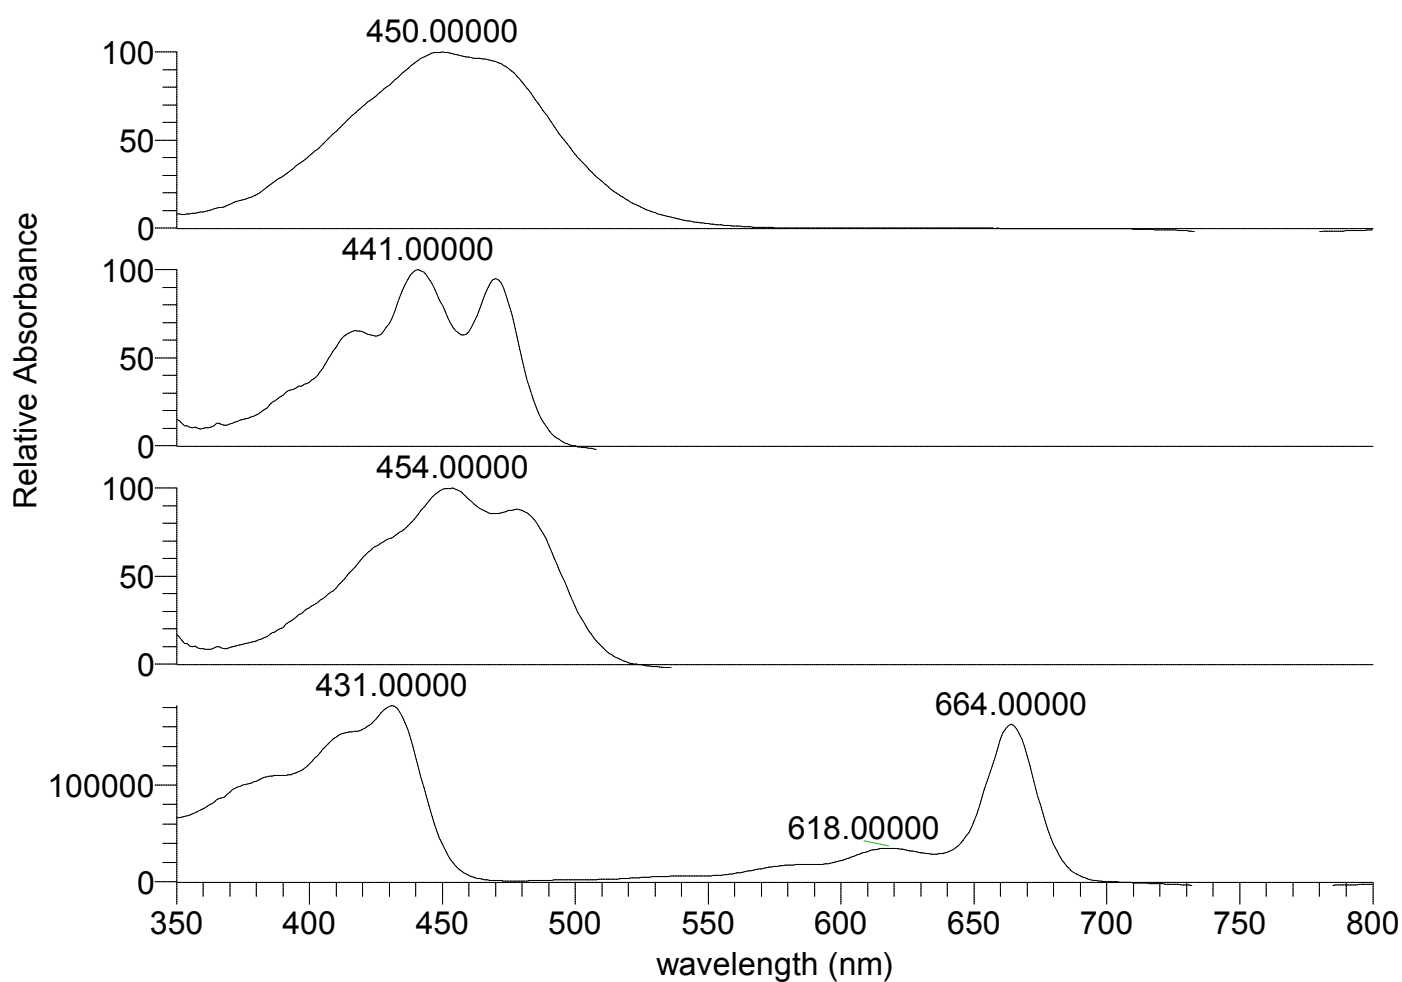

NL:  
1.37E5  
Muestra5#61  
96 RT:  
20.65 AV: 1

NL:  
1.22E4  
Muestra5#64  
91 RT:  
21.64 AV: 1

NL:  
1.22E4  
Muestra5#73  
26 RT:  
24.42 AV: 1

NL:  
1.82E5  
Muestra5#10  
826 RT:  
36.09 AV: 1
