# Supplementary material for: Photoprotective responses of three intertidal Antarctic macroalgae to short-term temperature stress
Source: Frontiers journal article supplement (doi:10.3389/fmars.2023.1223853), 2023-10-25
Supplement: Data_Sheet_1.zip [file Muestra6_HPLC-UV.pdf › Carotenoids/Muestra6_HPLC-UV.pdf]

RT: 0.00 - 49.46

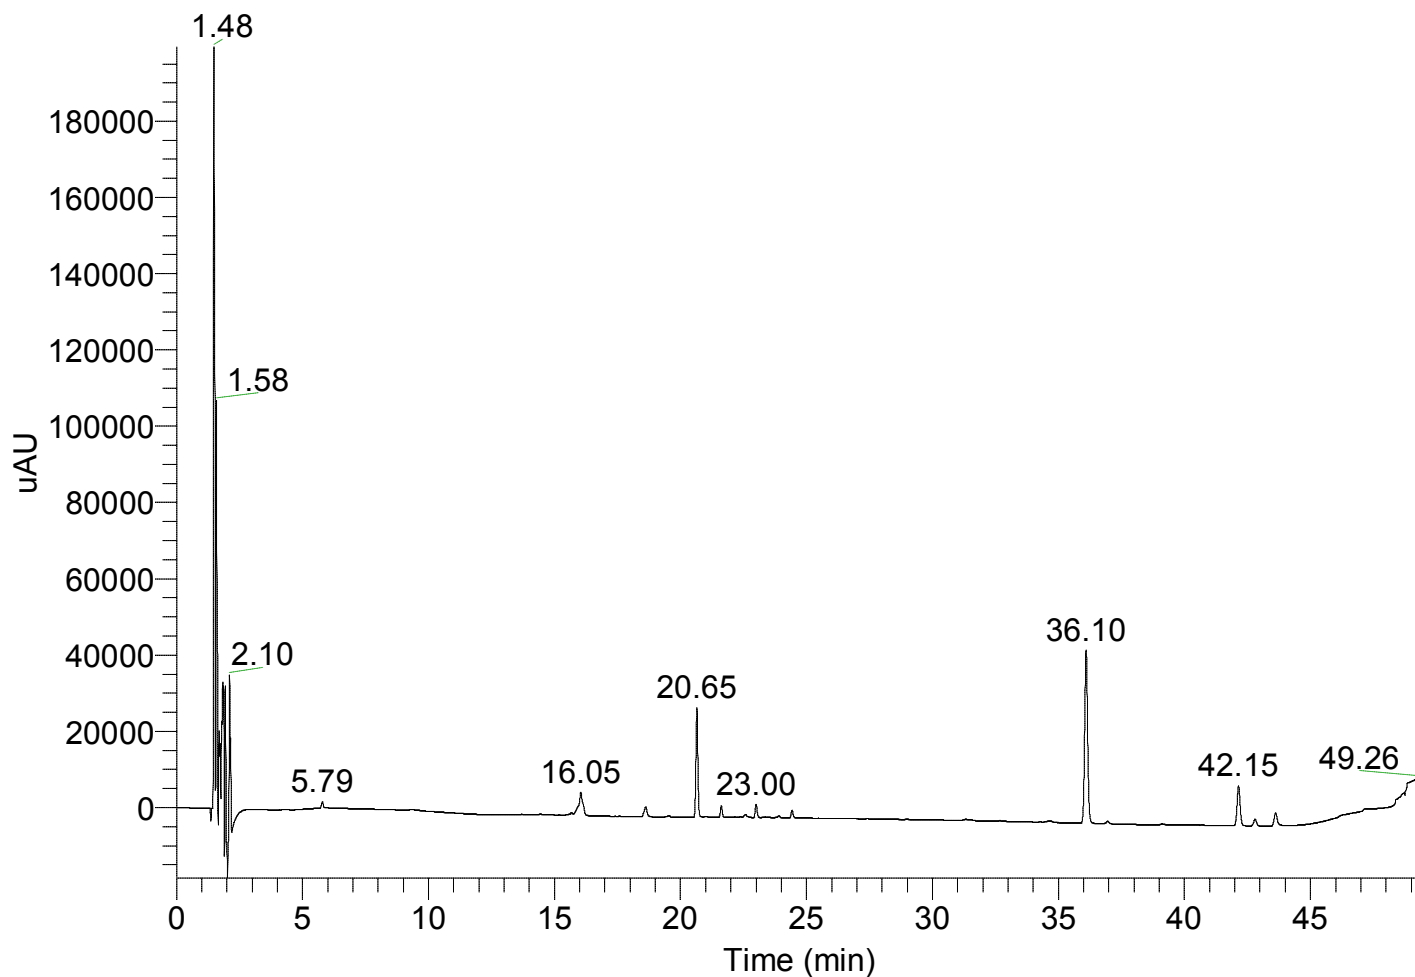

NL:  
1.99E5  
Total Scan  
PDA  
Muestra6

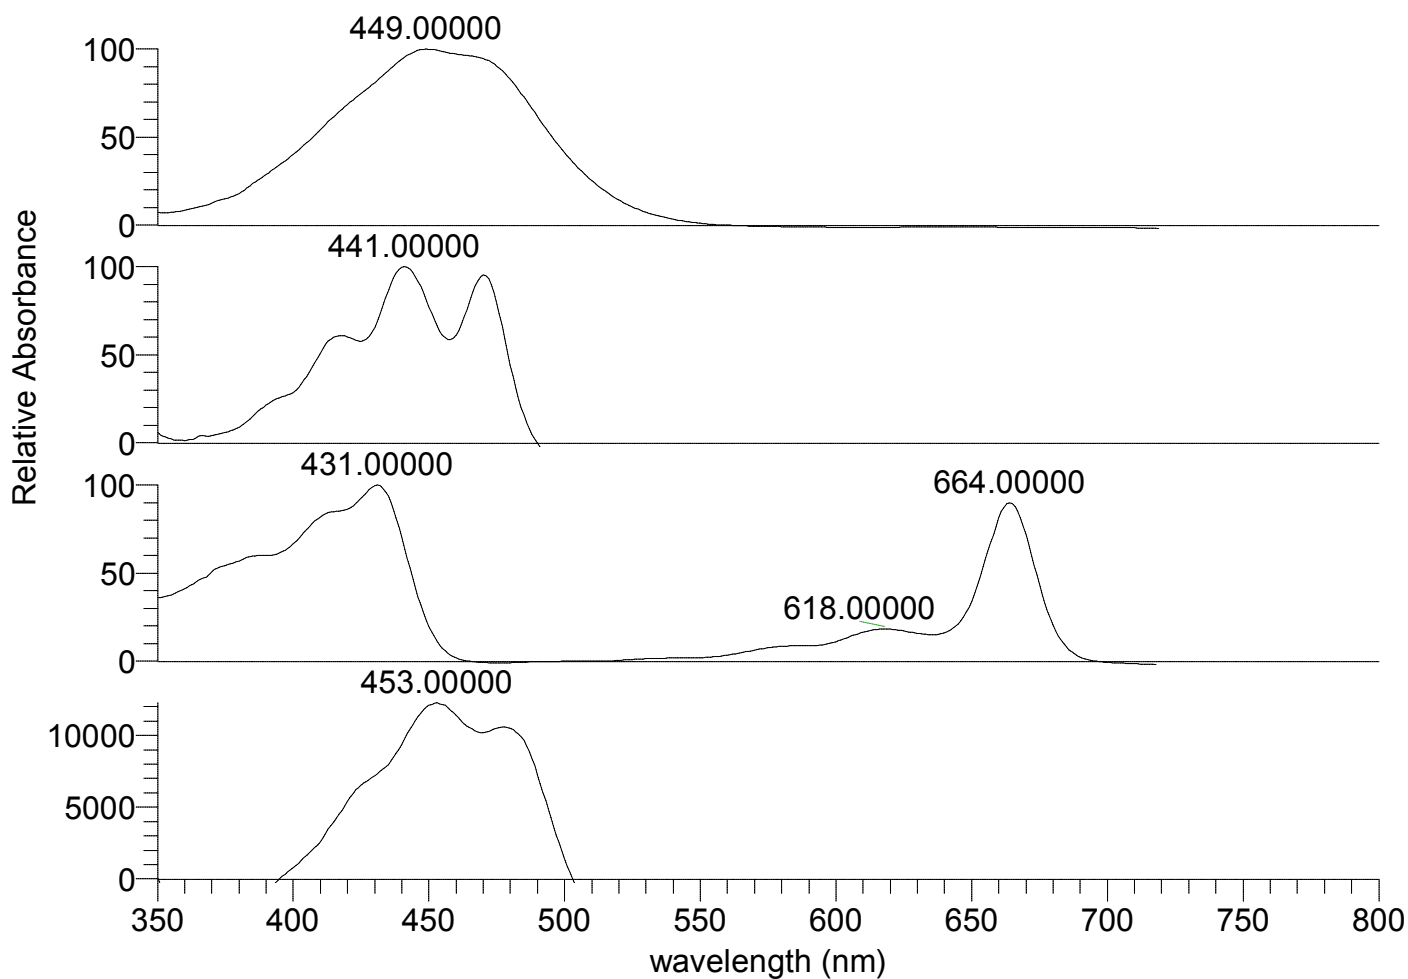

NL:  
1.31E5  
Muestra6#61  
94 RT:  
20.65 AV: 1

NL:  
1.64E4  
Muestra6#64  
85 RT:  
21.62 AV: 1

NL:  
1.87E5  
Muestra6#10  
834 RT:  
36.11 AV: 1

NL:  
1.23E4  
Muestra6#13  
089 RT:  
43.63 AV: 1
