# Supplementary material for: Photoprotective responses of three intertidal Antarctic macroalgae to short-term temperature stress
Source: Frontiers journal article supplement (doi:10.3389/fmars.2023.1223853), 2023-10-25
Supplement: Data_Sheet_1.zip [file Muestra8_HPLC-UV.pdf › Carotenoids/Muestra8_HPLC-UV.pdf]

RT: 0.00 - 61.20

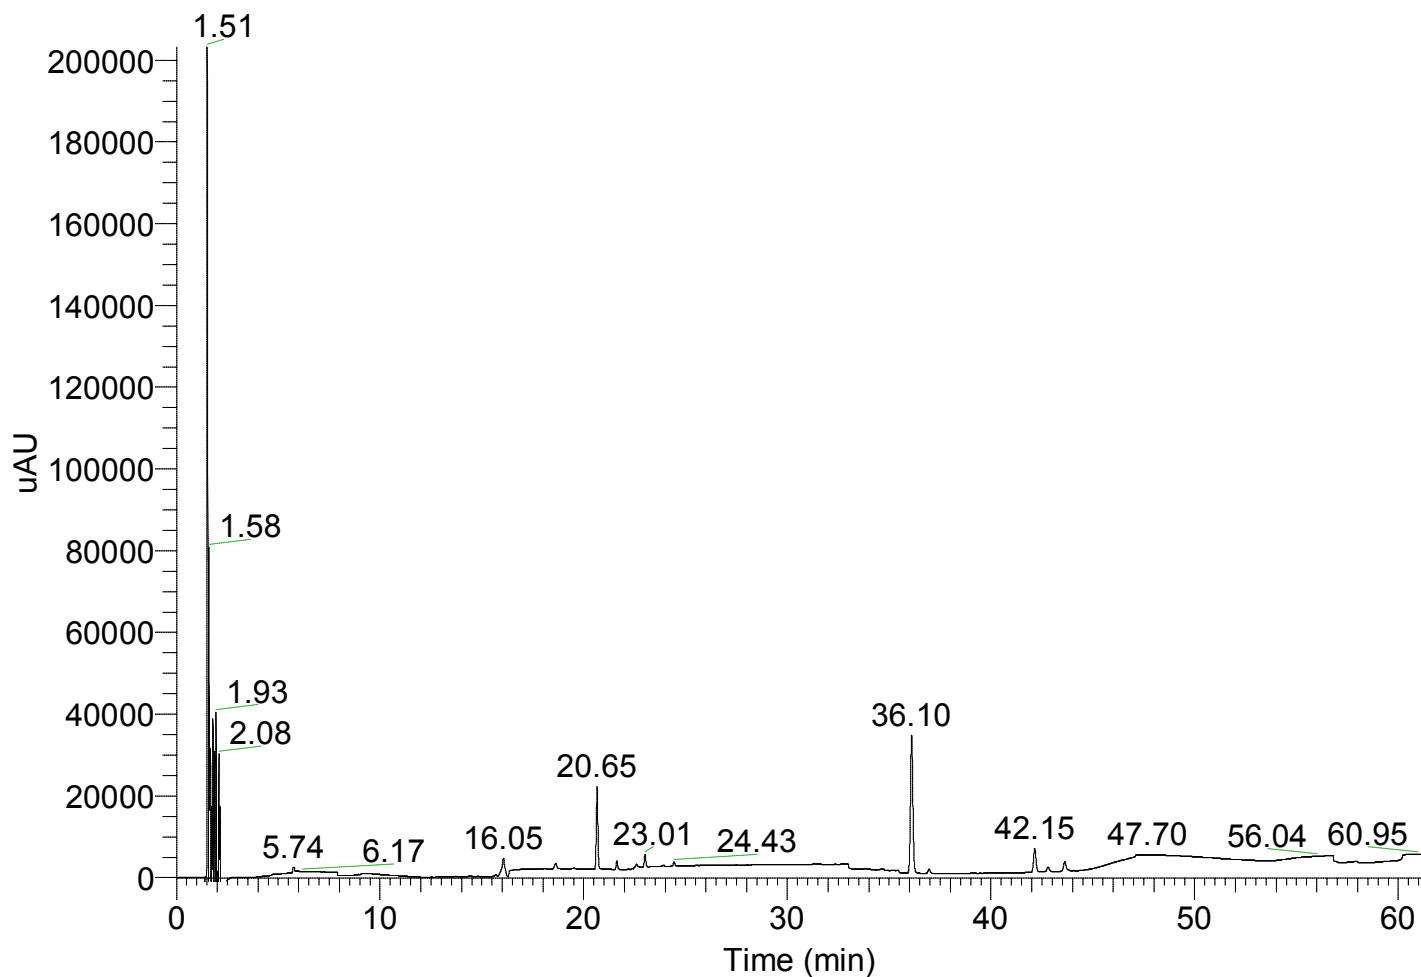

NL:  
2.03E5  
Total Scan  
PDA  
Muestra8

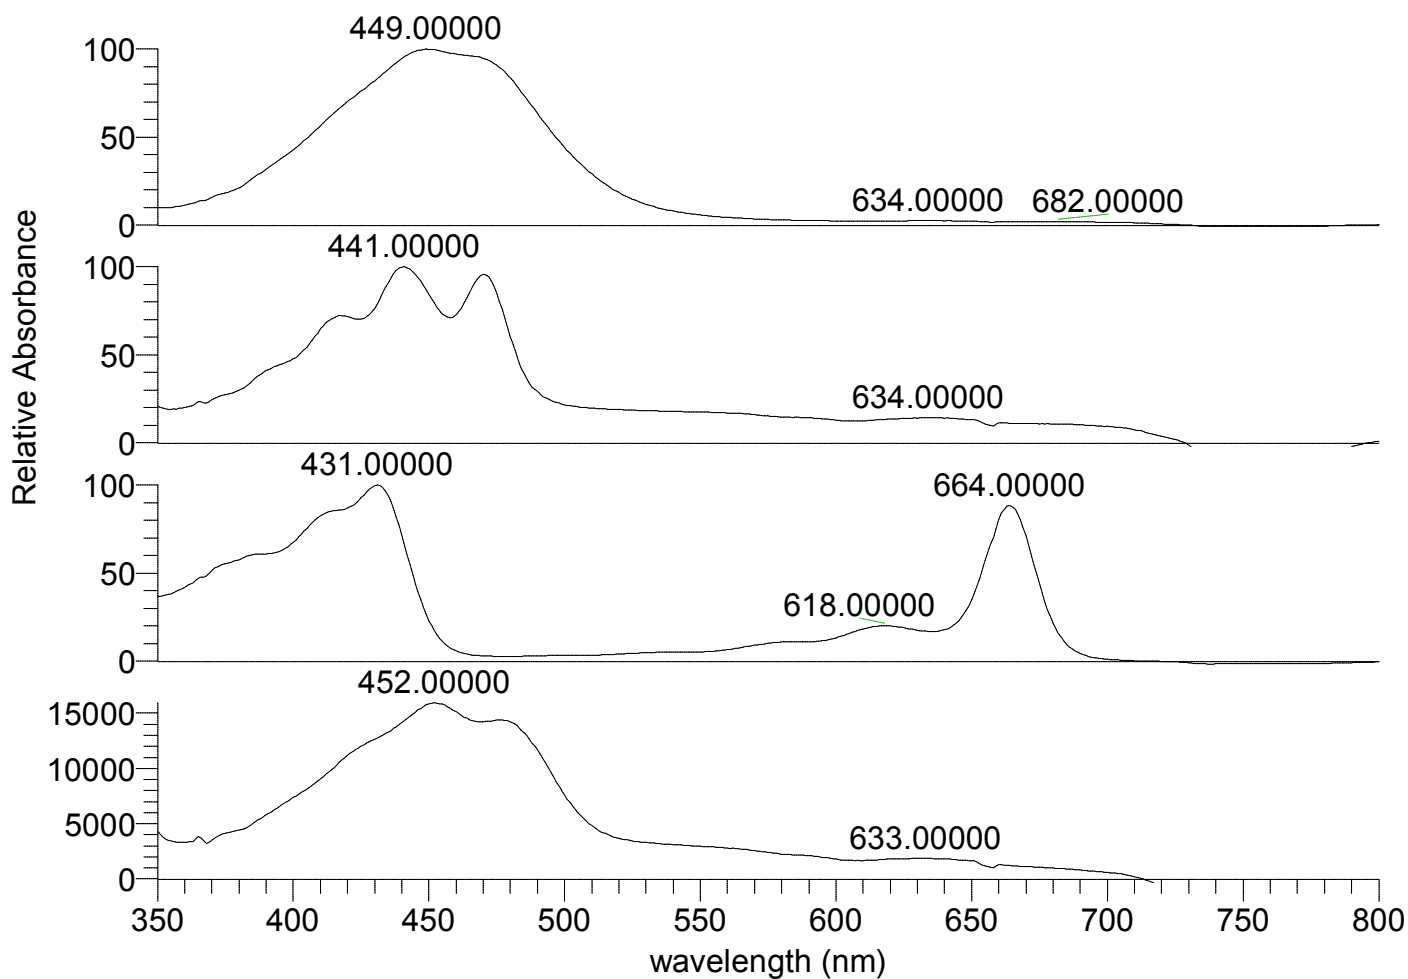

NL:  
9.46E4  
Muestra8#61  
93 RT:  
20.64 AV: 1

NL:  
1.66E4  
Muestra8#64  
87 RT:  
21.62 AV: 1

NL:  
1.52E5  
Muestra8#10  
830 RT:  
36.10 AV: 1

NL:  
1.59E4  
Muestra8#13  
089 RT:  
43.63 AV: 1
