# Supplementary material for: Photoprotective responses of three intertidal Antarctic macroalgae to short-term temperature stress
Source: Frontiers journal article supplement (doi:10.3389/fmars.2023.1223853), 2023-10-25
Supplement: Data_Sheet_1.zip [file Muestra18_HPLC-UV.pdf › Carotenoids/Muestra18_HPLC-UV.pdf]

RT: 0.00 - 61.20

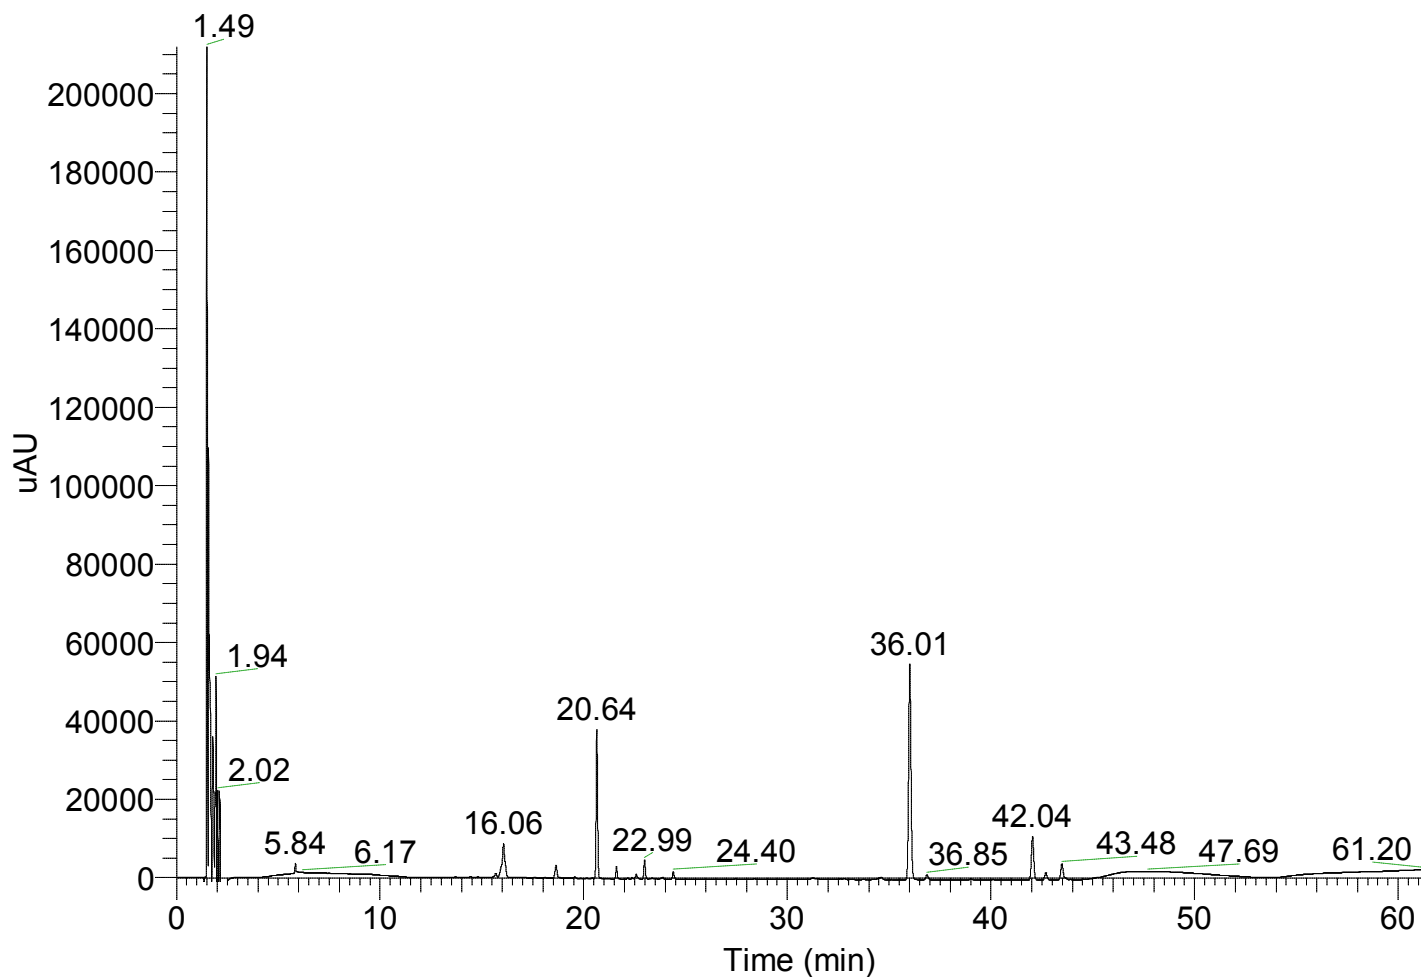

NL:  
2.12E5  
Total Scan  
PDA  
Muestra1

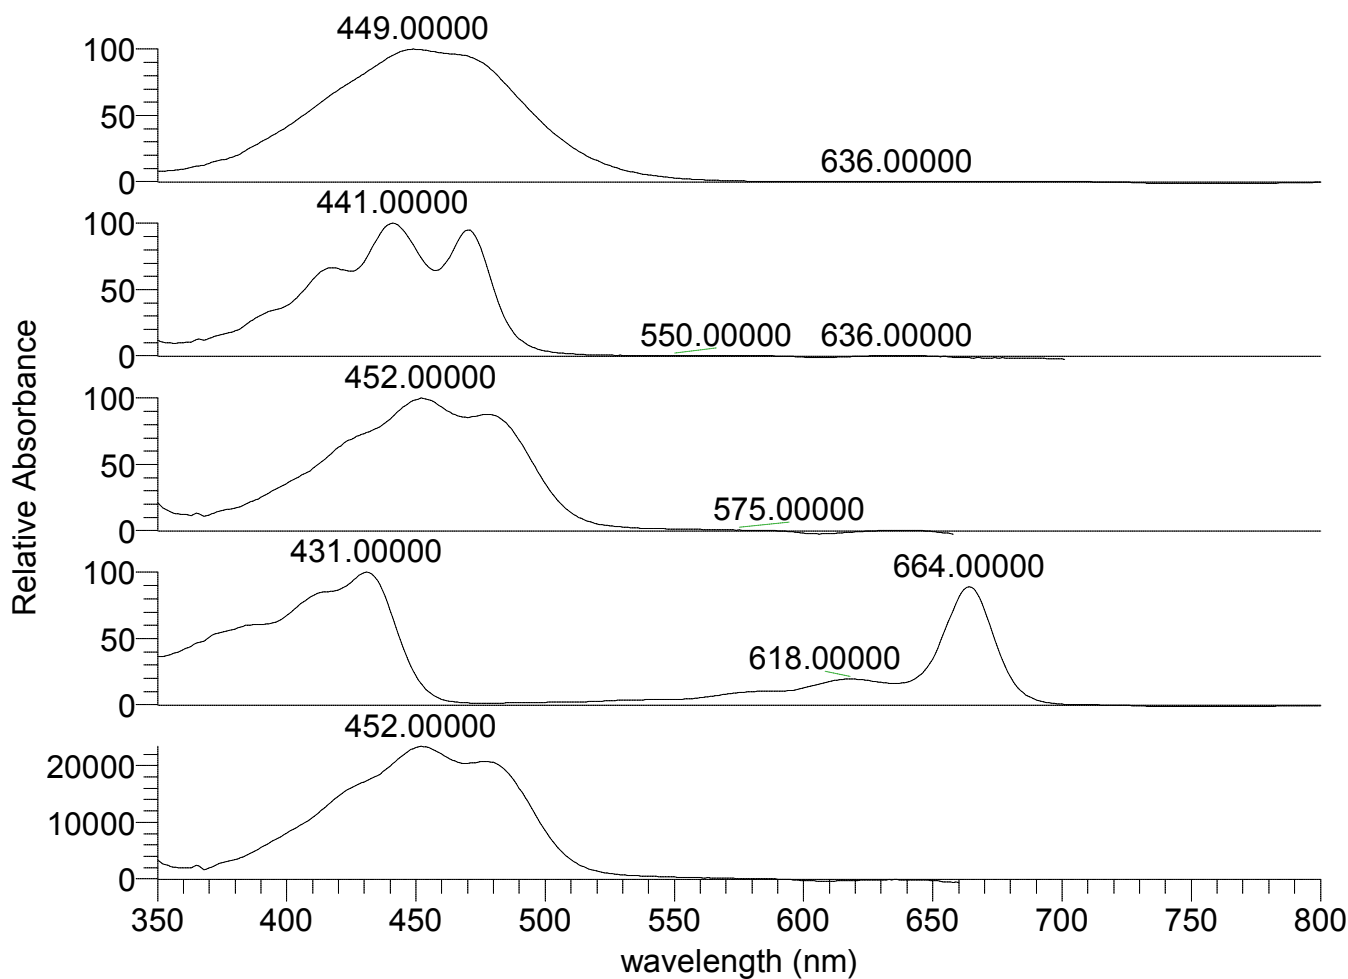

NL:  
1.79E5  
Muestra1#12386  
RT: 20.64 AV: 1

NL:  
2.20E4  
Muestra1#12964  
RT: 21.61 AV: 1

NL:  
1.12E4  
Muestra1#14638  
RT: 24.40 AV: 1

NL:  
2.44E5  
Muestra1#21605  
RT: 36.01 AV: 1

NL:  
2.34E4  
Muestra1#26090  
RT: 43.48 AV: 1
