# Supplementary material for: Photoprotective responses of three intertidal Antarctic macroalgae to short-term temperature stress
Source: Frontiers journal article supplement (doi:10.3389/fmars.2023.1223853), 2023-10-25
Supplement: Data_Sheet_1.zip [file Muestra118_HPLC-UV.pdf › Carotenoids/Muestra118_HPLC-UV.pdf]

RT: 15.30 - 51.89

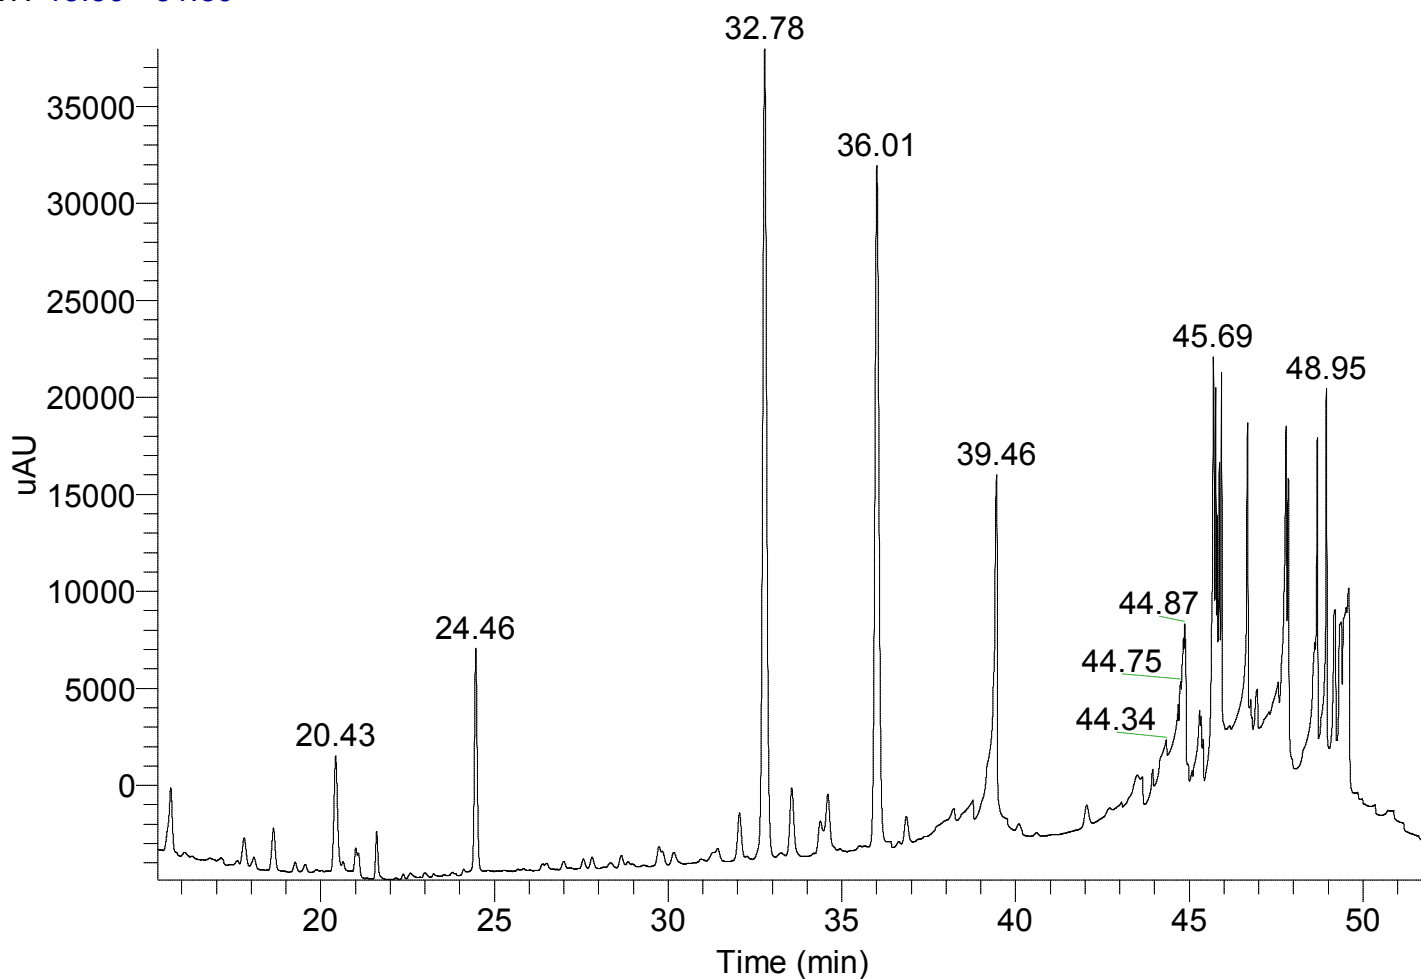

NL:  
3.79E4  
Total Scan  
PDA  
Muestra2

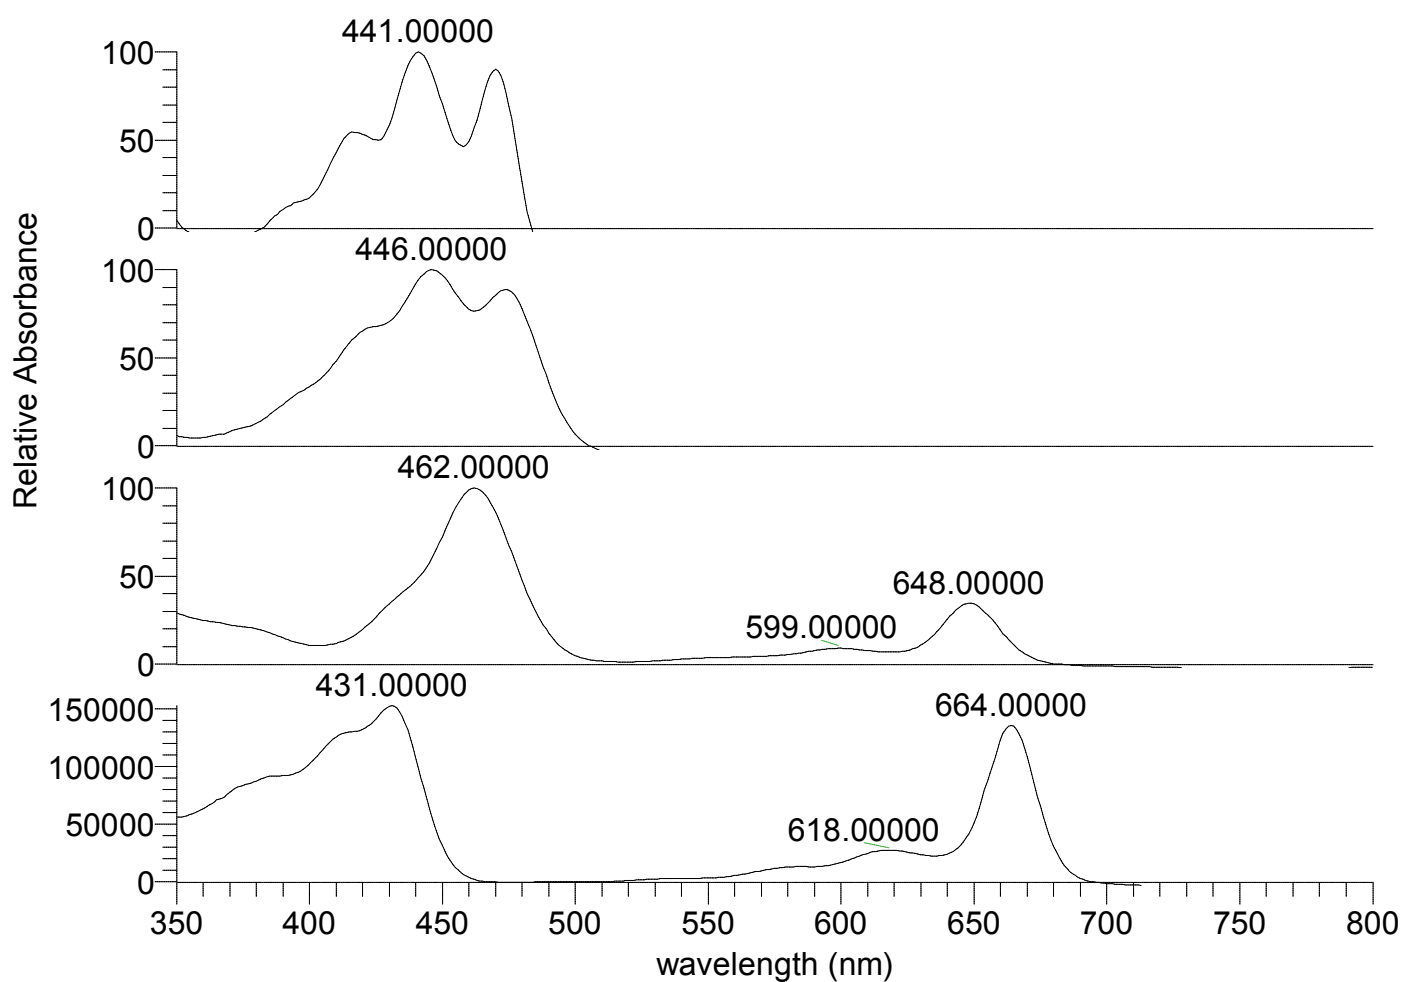

NL:  
1.08E4  
Muestra2#12  
965 RT:  
21.61 AV: 1

NL:  
6.16E4  
Muestra2#14  
675 RT:  
24.46 AV: 1

NL:  
2.52E5  
Muestra2#19  
667 RT:  
32.78 AV: 1

NL:  
1.52E5  
Muestra2#21  
607 RT:  
36.01 AV: 1
