# Supplementary material for: Photoprotective responses of three intertidal Antarctic macroalgae to short-term temperature stress
Source: Frontiers journal article supplement (doi:10.3389/fmars.2023.1223853), 2023-10-25
Supplement: Data_Sheet_1.zip [file Phenols HPLC.pdf › Phenols HPLC.pdf]

## INFORME 2

### CUANTIFICACION DE POLIFENOLES EN ALGAS ANTARTICAS

#### I. Metodología

La identificación y cuantificación de polifenoles se realizó utilizando un método de cromatografía líquida de alta resolución, basado en el descrito por Celis-Plá *et al.* (2018) al que se realizaron modificaciones.

Se trabajo sobre un extracto de algas metanol/agua, almacenado a -80°C antes de su análisis, que fue centrifugado a 4000 rpm por 5 min y filtrado por 0,22µm previo a su inyección en el cromatógrafo.

Se utilizó un cromatógrafo líquido de alta resolución con autosampler modelo SIL20AC, horno de columna modelo CTO-20AC, desgasificador modelo DGU-20A5, bomba modelo LC-20AD y detector de arreglo de diodo SPD M20A, Shimadzu.

La identificación de los polifenoles se realizó por comparación de los tiempos de retención y espectros de absorción de estándares (190- 800 nm) de floroglucinol, ácido gálico, ácido cafeico, rutina, ácido cinámico, quercetina y camferol con las señales cromatográficas detectadas en las muestras. Los tiempos de retención de los estándares fueron 4,49; 4,98;18,91; 25,42; 25,74; 35,00 y 42,12 min.

La separación cromatográfica se realizó sobre un volumen de muestra de 100 µL, en una columna RP18 InertSustain (4,6 x250mm, 5µm), protegida por una precolumna Nucleodur C18 Gravity, en un horno a 30°C, detectándose los analitos a una longitud de onda de trabajo de 280nm. La fase móvil consistió en acetonitrilo (A) y ácido fosfórico al 1% en agua HPLC (B). La elución de los analitos se realizó en gradiente, como indica en la siguiente tabla.

| Tiempo (min) | Fase móvil |     |
|--------------|------------|-----|
|              | A          | B   |
| 0            | 10         | 90  |
| 12,0         | 12         | 88  |
| 16,0         | 12         | 88  |
| 16,01        | 15         | 85  |
| 18,00        | 15         | 85  |
| 18,01        | 30         | 70  |
| 30,0         | 30         | 70  |
| 30,01        | 35         | 65  |
| 36,0         | 35         | 65  |
| 36,01        | 10         | 90  |
| 45,0         | 10         | 90  |
| 45,01        | 0          | 100 |
| 54,0         | 0          | 100 |

## II. Resultados

Tabla N°1: Composición de polifenoles en muestras de algas (µg/mL)

| Muestra | Floroglucinol<br>µg/mL | Ac Gálico<br>µg/mL | Ac. Cafeico<br>µg/mL | Rutina<br>µg/mL | Ac, Cinámico<br>µg/mL | Quercetina<br>µg/mL | Camferol<br>µg/mL |
|---------|------------------------|--------------------|----------------------|-----------------|-----------------------|---------------------|-------------------|
| 1       | 0,93                   | ND                 | ND                   | ND              | ND                    | ND                  | ND                |
| 2       | ND                     | 1,42               | ND                   | ND              | ND                    | ND                  | ND                |
| 3       | 177,38                 | ND                 | ND                   | ND              | ND                    | ND                  | ND                |
| 4       | 11,64                  | 0,75               | ND                   | ND              | ND                    | ND                  | ND                |
| 8       | 9,41                   | 0,24               | ND                   | ND              | ND                    | ND                  | ND                |
| 9       | ND                     | 1,22               | ND                   | ND              | ND                    | ND                  | ND                |
| 10      | ND                     | 1,19               | ND                   | ND              | ND                    | ND                  | ND                |
| 11      | 0,35                   | 0,36               | ND                   | ND              | ND                    | ND                  | ND                |
| 12      | 9,27                   | 1,05               | ND                   | ND              | ND                    | ND                  | ND                |
| 13      | ND                     | ND                 | ND                   | ND              | ND                    | ND                  | 3,88              |
| 14      | 28,18                  | ND                 | ND                   | ND              | ND                    | ND                  | 3,03              |
| 15      | 20,59                  | ND                 | ND                   | ND              | ND                    | ND                  | 2,60              |
| 16      | ND                     | ND                 | ND                   | ND              | ND                    | ND                  | ND                |
| 17      | ND                     | ND                 | ND                   | ND              | ND                    | ND                  | ND                |
| 18      | 3,88                   | ND                 | ND                   | ND              | ND                    | ND                  | ND                |
| 19      | 18,89                  | ND                 | ND                   | ND              | ND                    | ND                  | ND                |
| 20      | ND                     | ND                 | ND                   | ND              | ND                    | ND                  | ND                |
| 21      | ND                     | ND                 | ND                   | ND              | ND                    | ND                  | ND                |
| 22      | ND                     | ND                 | ND                   | ND              | ND                    | ND                  | ND                |
| 23      | ND                     | ND                 | ND                   | ND              | ND                    | ND                  | ND                |
| 24      | ND                     | ND                 | ND                   | ND              | ND                    | ND                  | ND                |
| 25      | ND                     | ND                 | ND                   | ND              | ND                    | ND                  | ND                |
| 26      | ND                     | ND                 | ND                   | ND              | ND                    | ND                  | ND                |
| 27      | ND                     | ND                 | ND                   | ND              | ND                    | ND                  | ND                |
| 28      | ND                     | ND                 | ND                   | ND              | ND                    | ND                  | ND                |
| 28 AZUL | ND                     | ND                 | ND                   | ND              | ND                    | ND                  | ND                |
| 29      | ND                     | ND                 | ND                   | ND              | ND                    | ND                  | ND                |
| 31 AZUL | ND                     | ND                 | ND                   | ND              | ND                    | ND                  | ND                |
| 32 AZUL | ND                     | ND                 | ND                   | ND              | ND                    | ND                  | ND                |
| 33      | ND                     | ND                 | ND                   | ND              | ND                    | ND                  | ND                |
| 34      | ND                     | ND                 | ND                   | ND              | ND                    | ND                  | ND                |
| 35      | ND                     | ND                 | ND                   | ND              | ND                    | ND                  | ND                |
| 36      | ND                     | ND                 | ND                   | ND              | ND                    | ND                  | ND                |
| 37      | ND                     | ND                 | ND                   | ND              | ND                    | ND                  | ND                |

|    |    |    |    |      |    |    |    |
|----|----|----|----|------|----|----|----|
| 38 | ND | ND | ND | 1,41 | ND | ND | ND |
| 39 | ND | ND | ND | 1,43 | ND | ND | ND |

L.D. Floroglucinol: 0,002 µg/mL; L.D. Ac. Gálico: 0,001 µg/mL; L.D. Ac. Cafeico: 0,001 µg/mL;

L.D. Rutina: 0,001 µg/mL; L.D. Ac. Cinámico: 0,001 µg/mL; L.D. Quercetina: 0,001 µg/mL;

L.D. Camferol: 0,001 µg/mL

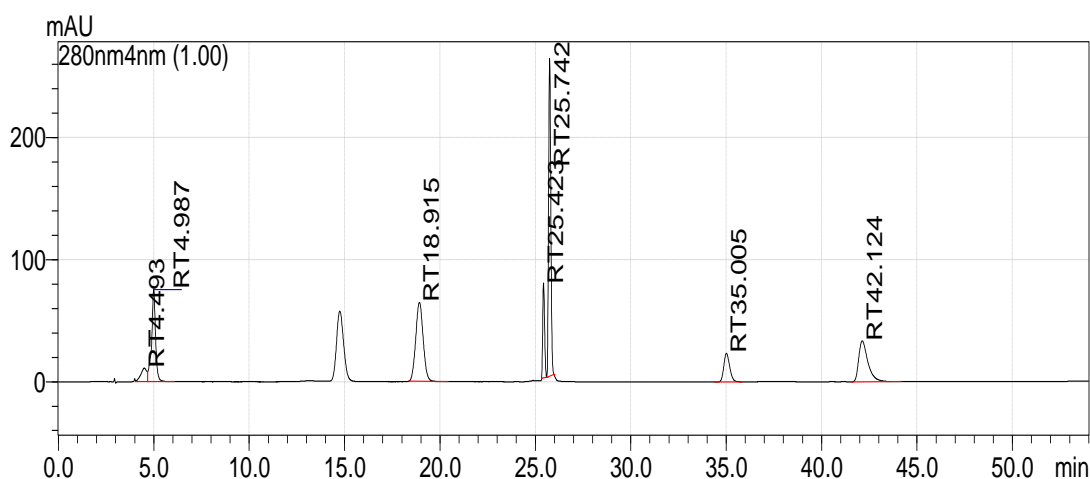

Figura N°1: Cromatograma de estándares utilizados en el ensayo y por orden de elución aparecen floroglucinol, ácido gálico, ácido cafeico, rutina, ácido cinámico, quercetina y camferol.

La señal cromatográfica que se muestra sin tiempo de retención corresponde a la elución conjunta de ácido clorogénico y el ácido 3,4 hidroxibenzoico.

### III. Bibliografía

Celis-Plá, P., Brown, M., Santillán-Sarmiento, A., Korbee, N., Sáez, C., Figueroa, F., 2018. Ecophysiological and metabolic responses to interactive exposure to nutrients and copper excess in the brown macroalga *Cystoseira tamariscifolia*. Marine Pollution Bulletin 128 (2018) 214–222

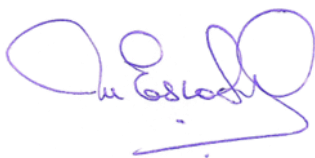

Realizado por: Marcela Escobar P.,

24 de abril 2022
