# Supplementary figures and images for: Photoprotective responses of three intertidal Antarctic macroalgae to short-term temperature stress (part 1 of 2)
Source: Frontiers journal article supplement (doi:10.3389/fmars.2023.1223853), 2023-10-25

MUESTRA A


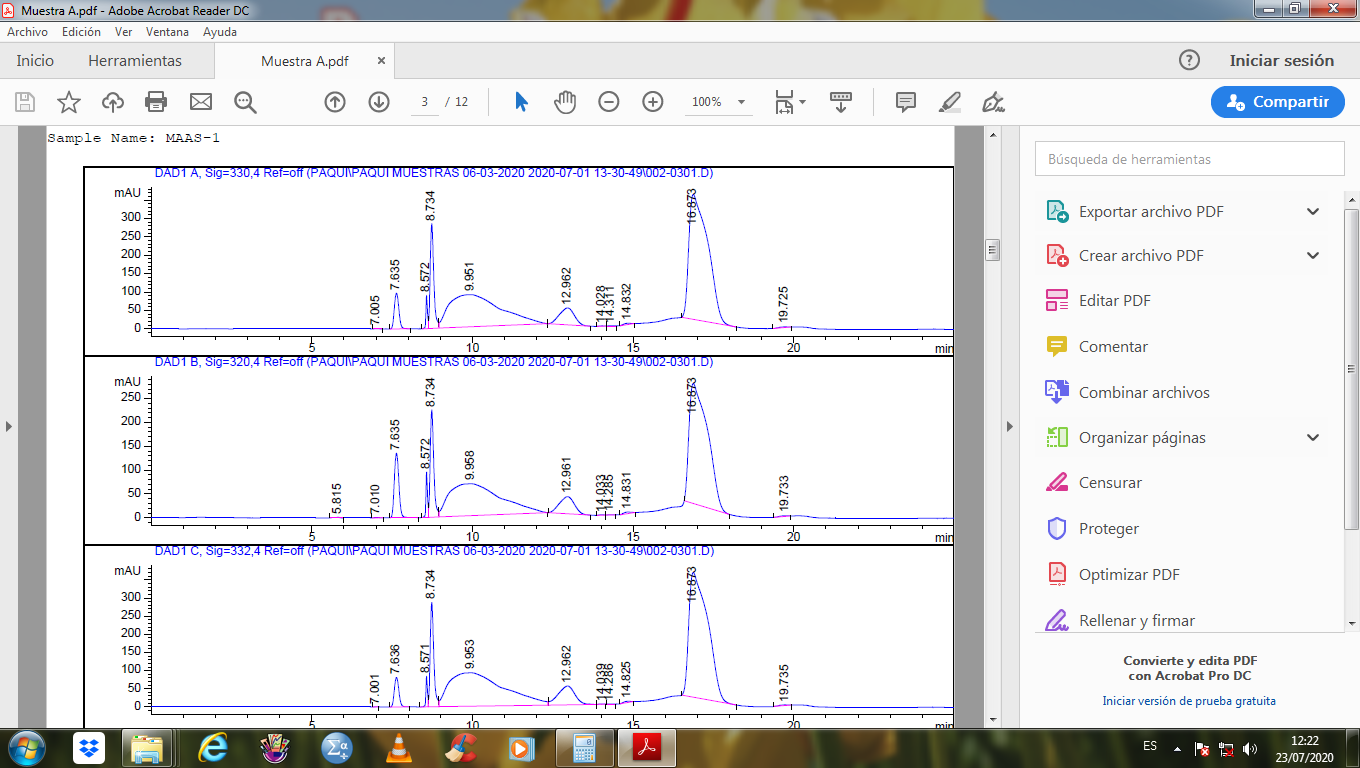


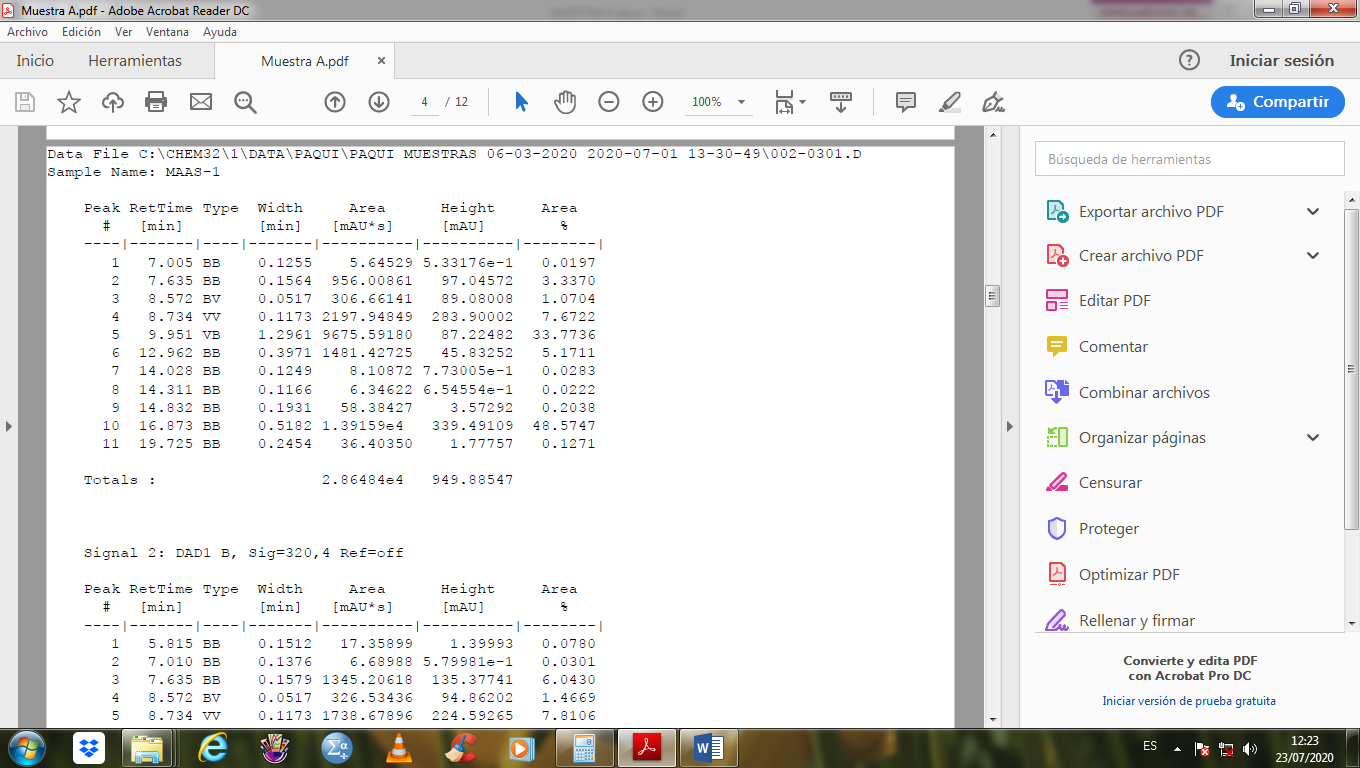

Supplement: Data_Sheet_1.zip [file MUESTRA A.docx]

RT: 0.00 - 61.20

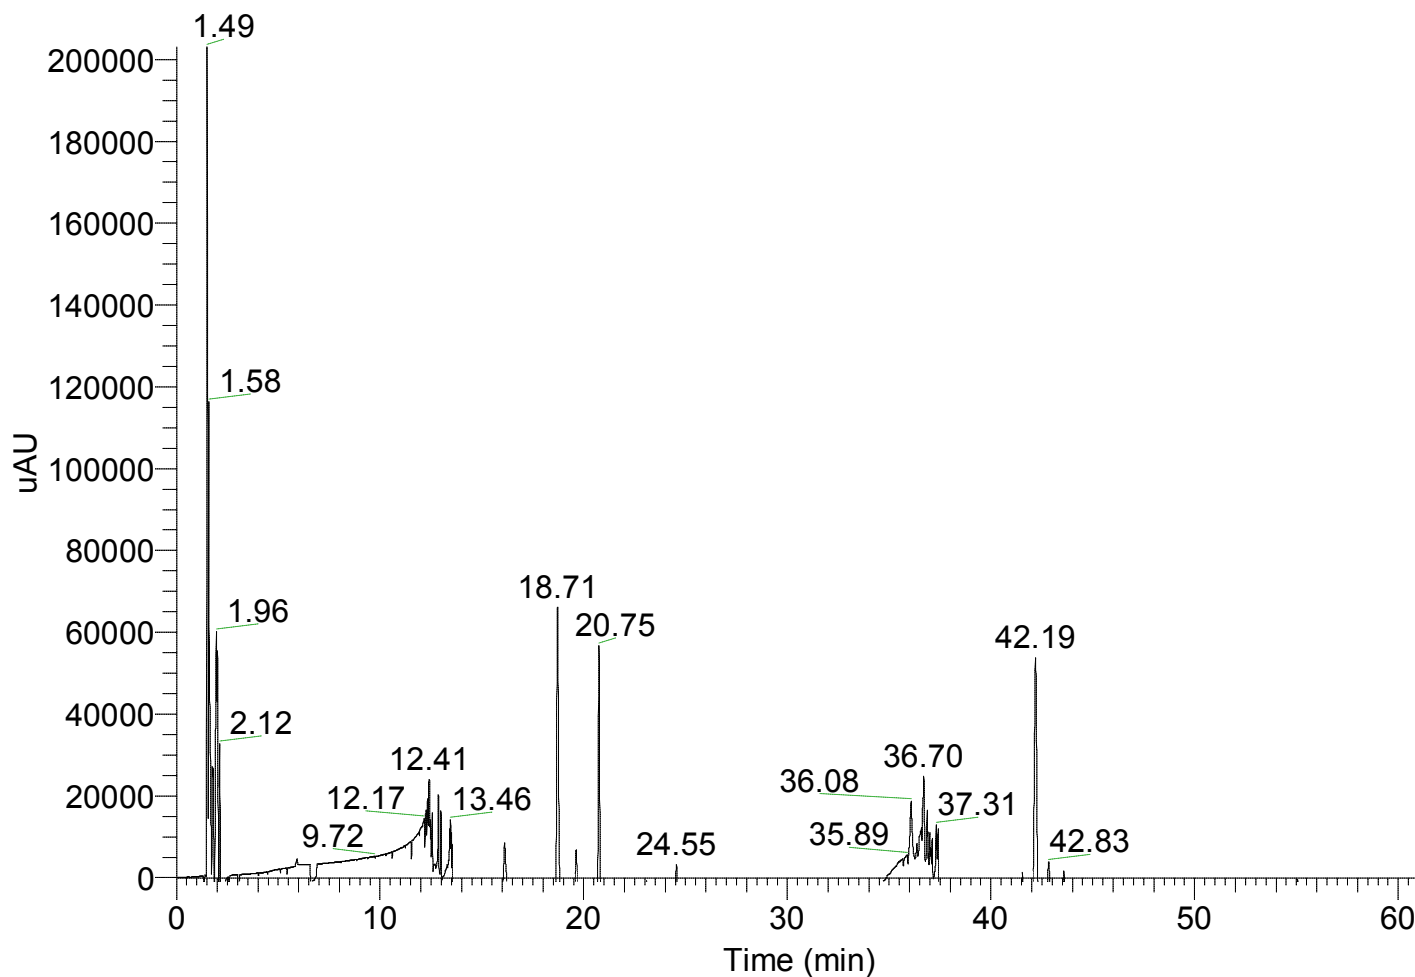

NL:  
2.03E5  
Total Scan  
PDA 100

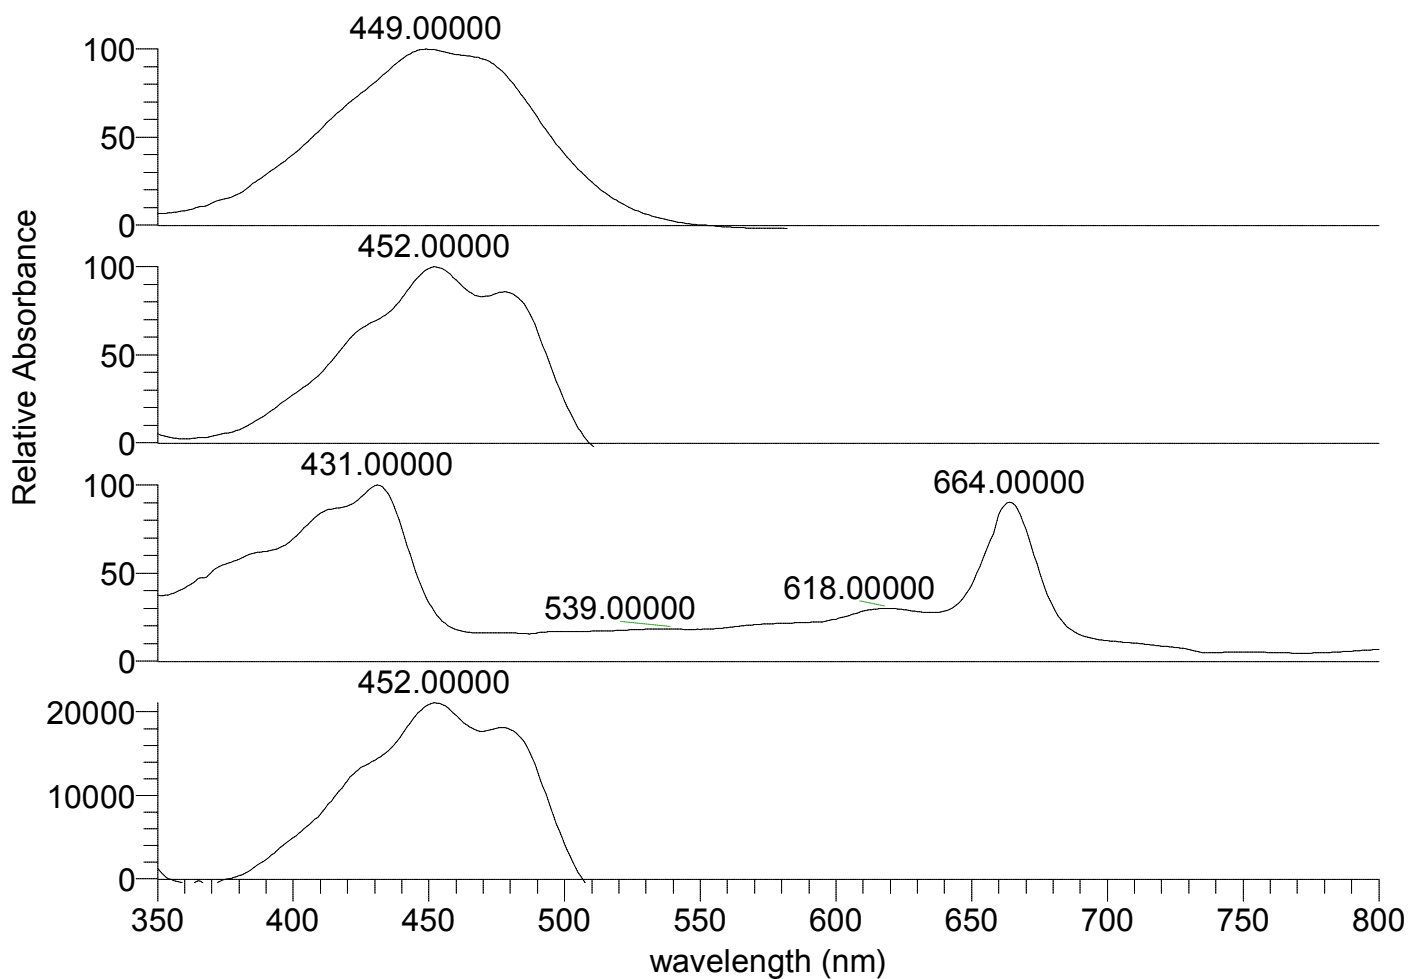

NL:  
2.85E5  
100#6226  
RT: 20.75  
AV: 1

NL:  
4.88E4  
100#7365  
RT: 24.55  
AV: 1

NL:  
6.00E4  
100#10823  
RT: 36.08  
AV: 1

NL:  
2.11E4  
100#13067  
RT: 43.56  
AV: 1

Supplement: Data_Sheet_1.zip [file Muestra100_HPLC-UV.pdf › Carotenoids/Muestra100_HPLC-UV.pdf]

RT: 0.00 - 61.20

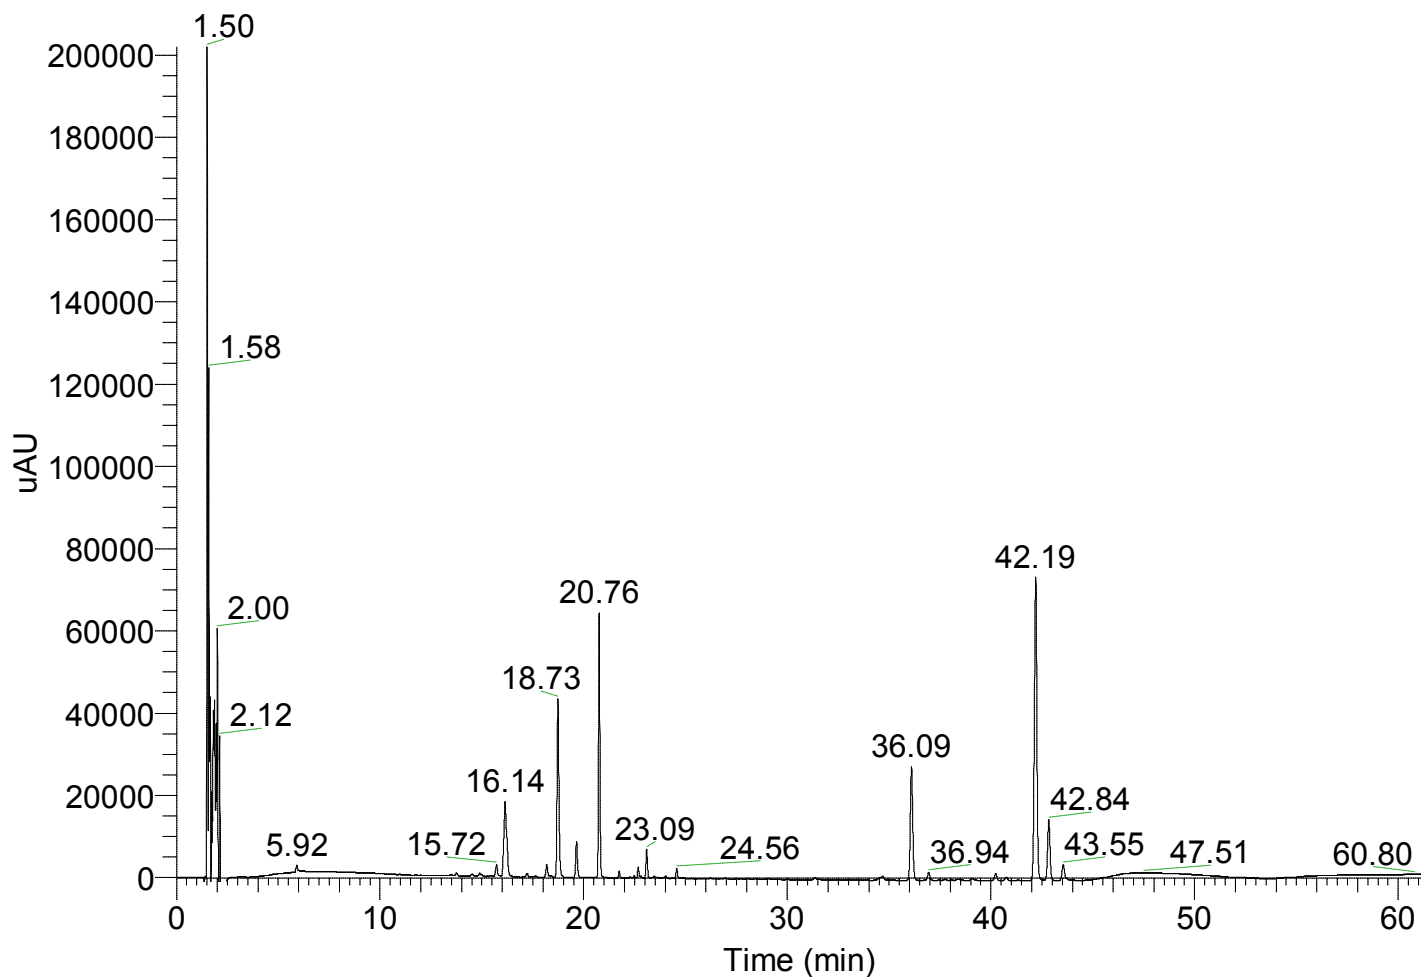

NL:  
2.02E5  
Total Scan  
PDA 101

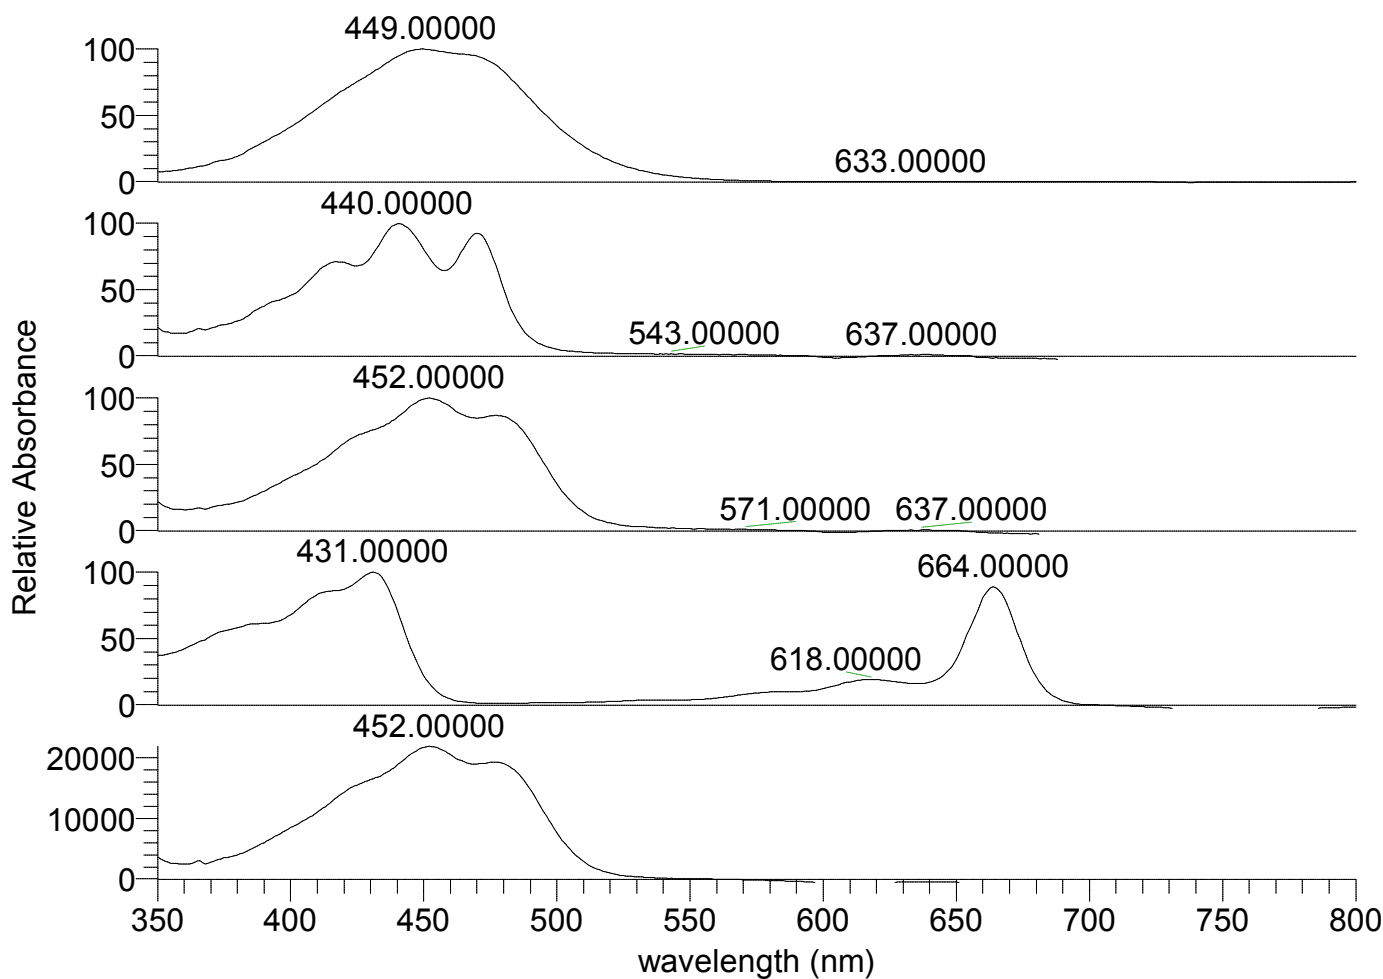

NL:  
3.03E5  
101#6227  
RT: 20.76  
AV: 1

NL:  
1.23E4  
101#6521  
RT: 21.74  
AV: 1

NL:  
1.39E4  
101#7368  
RT: 24.56  
AV: 1

NL:  
1.23E5  
101#10827  
RT: 36.09  
AV: 1

NL:  
2.19E4  
101#13065  
RT: 43.55  
AV: 1

Supplement: Data_Sheet_1.zip [file Muestra101_HPLC-UV.pdf › Carotenoids/Muestra101_HPLC-UV.pdf]

MUESTRA B


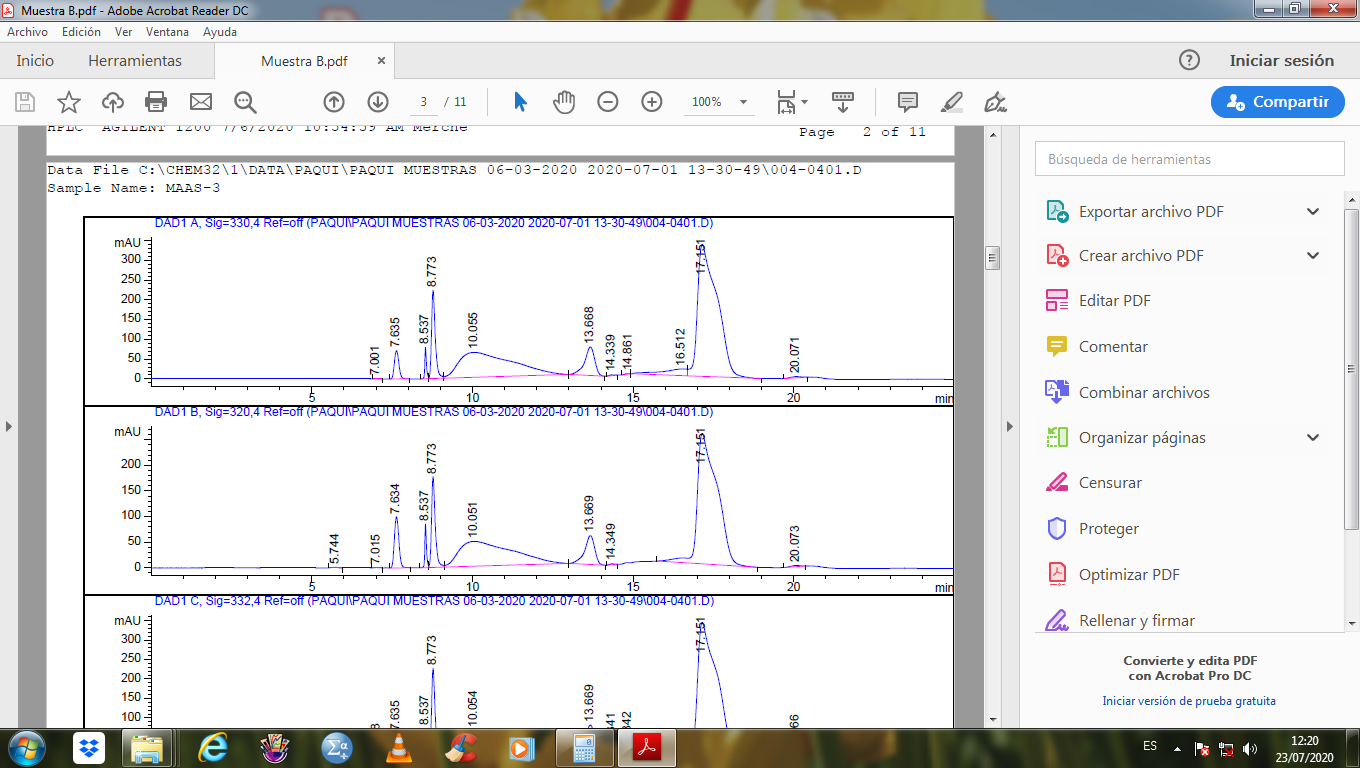


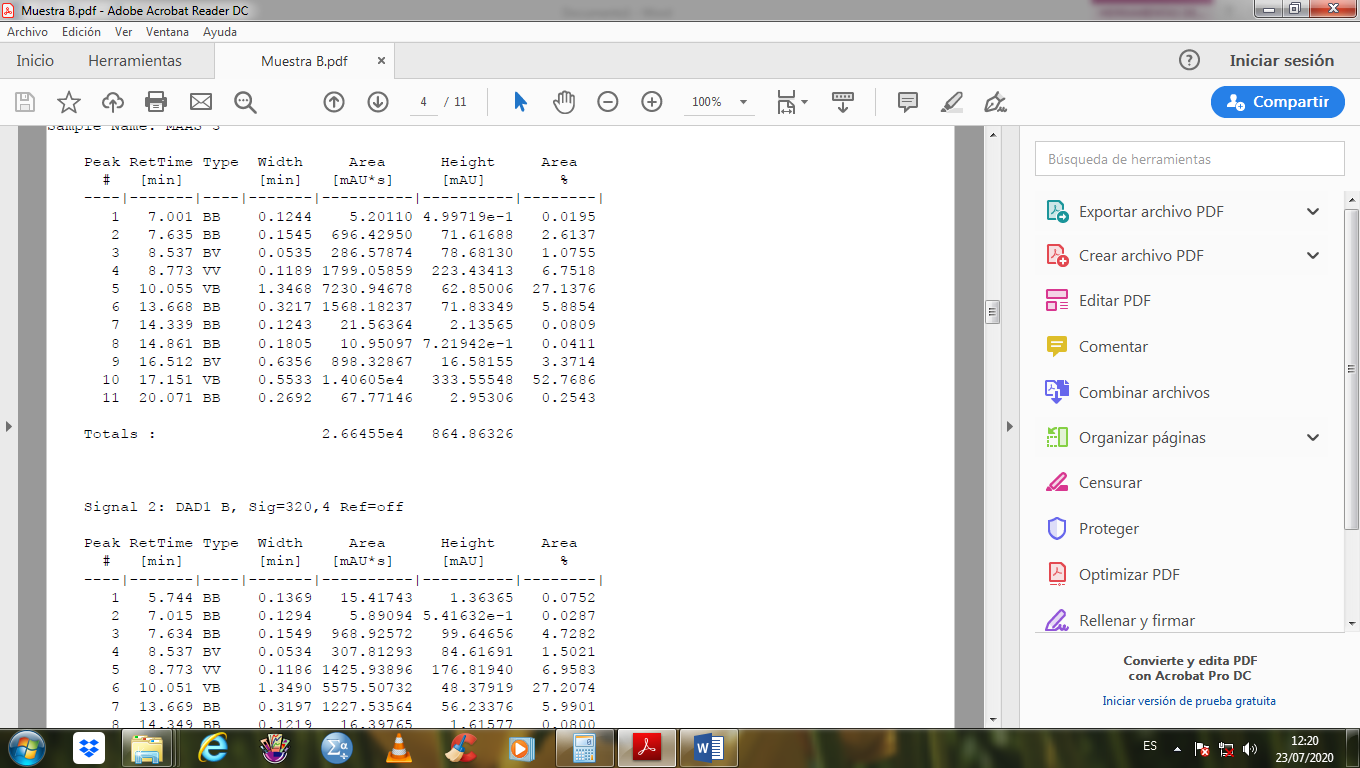

Supplement: Data_Sheet_1.zip [file MUESTRA B.docx]

MUESTRA C


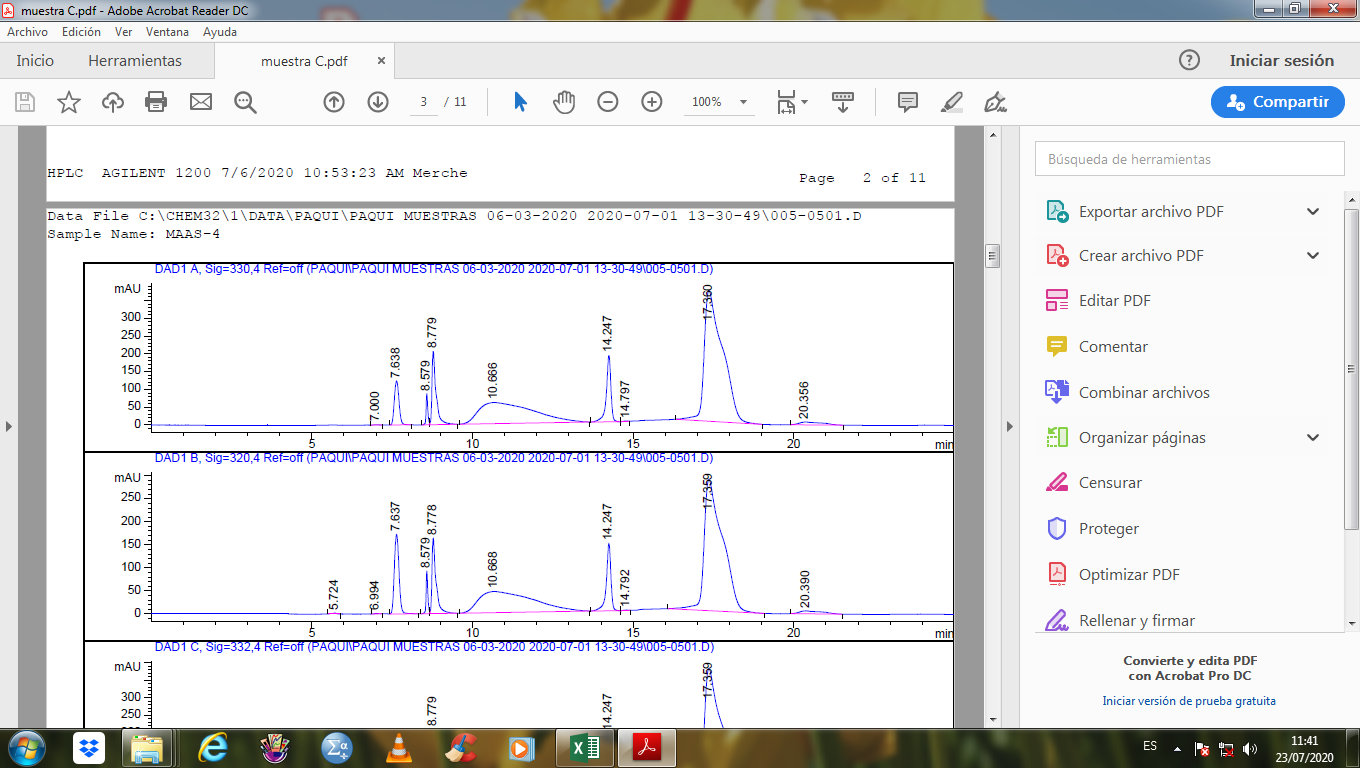


A 330 nm


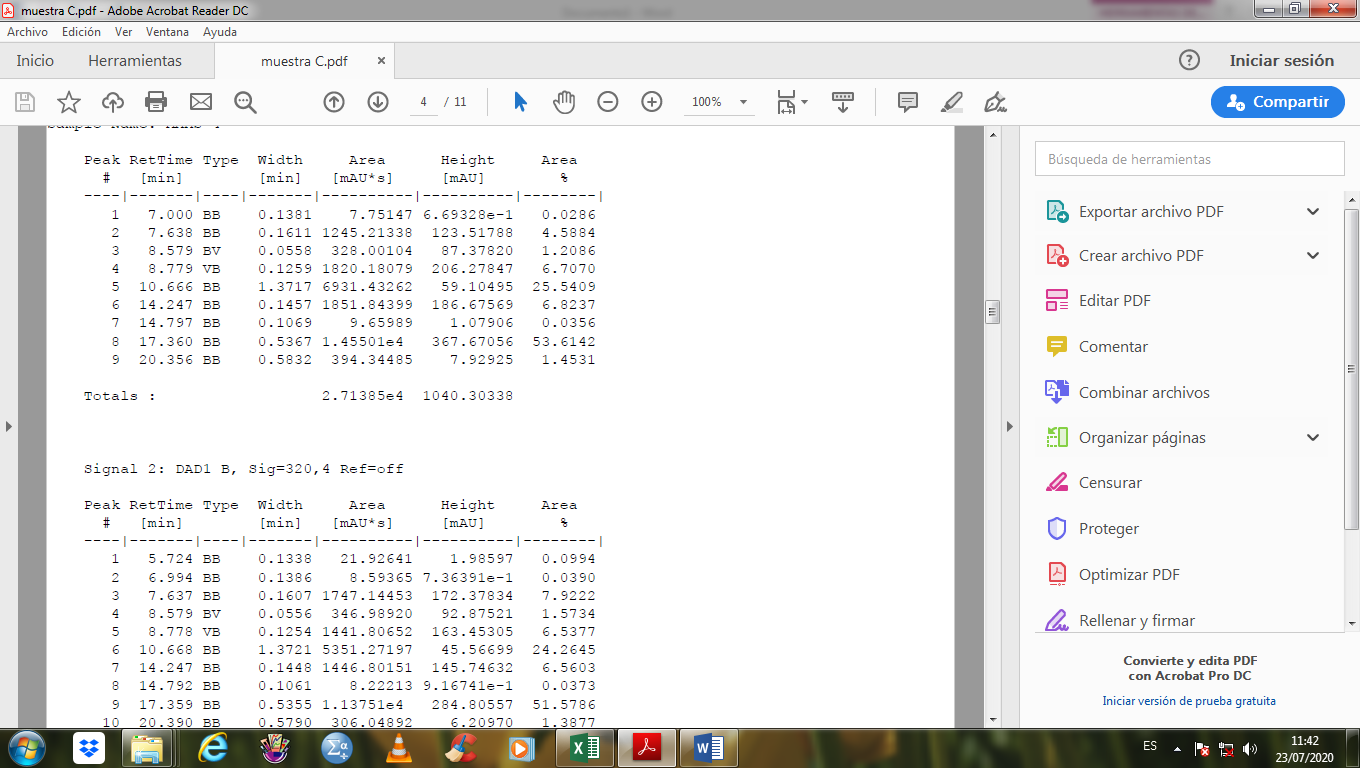

Supplement: Data_Sheet_1.zip [file MUESTRA C.docx]

RT: 0.00 - 61.20

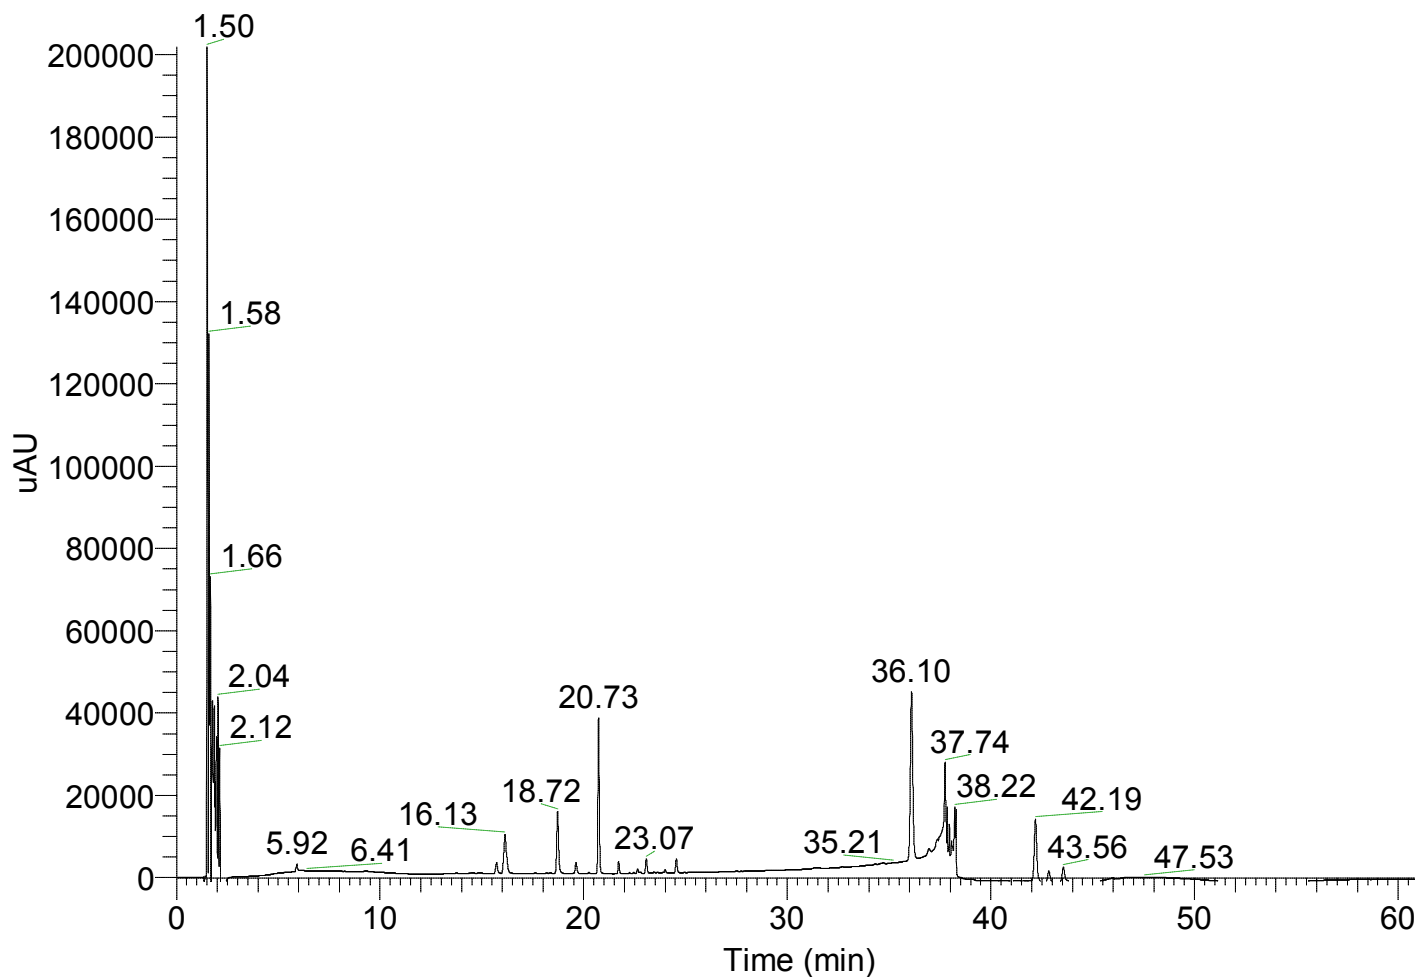

NL:  
2.02E5  
Total Scan  
PDA 102

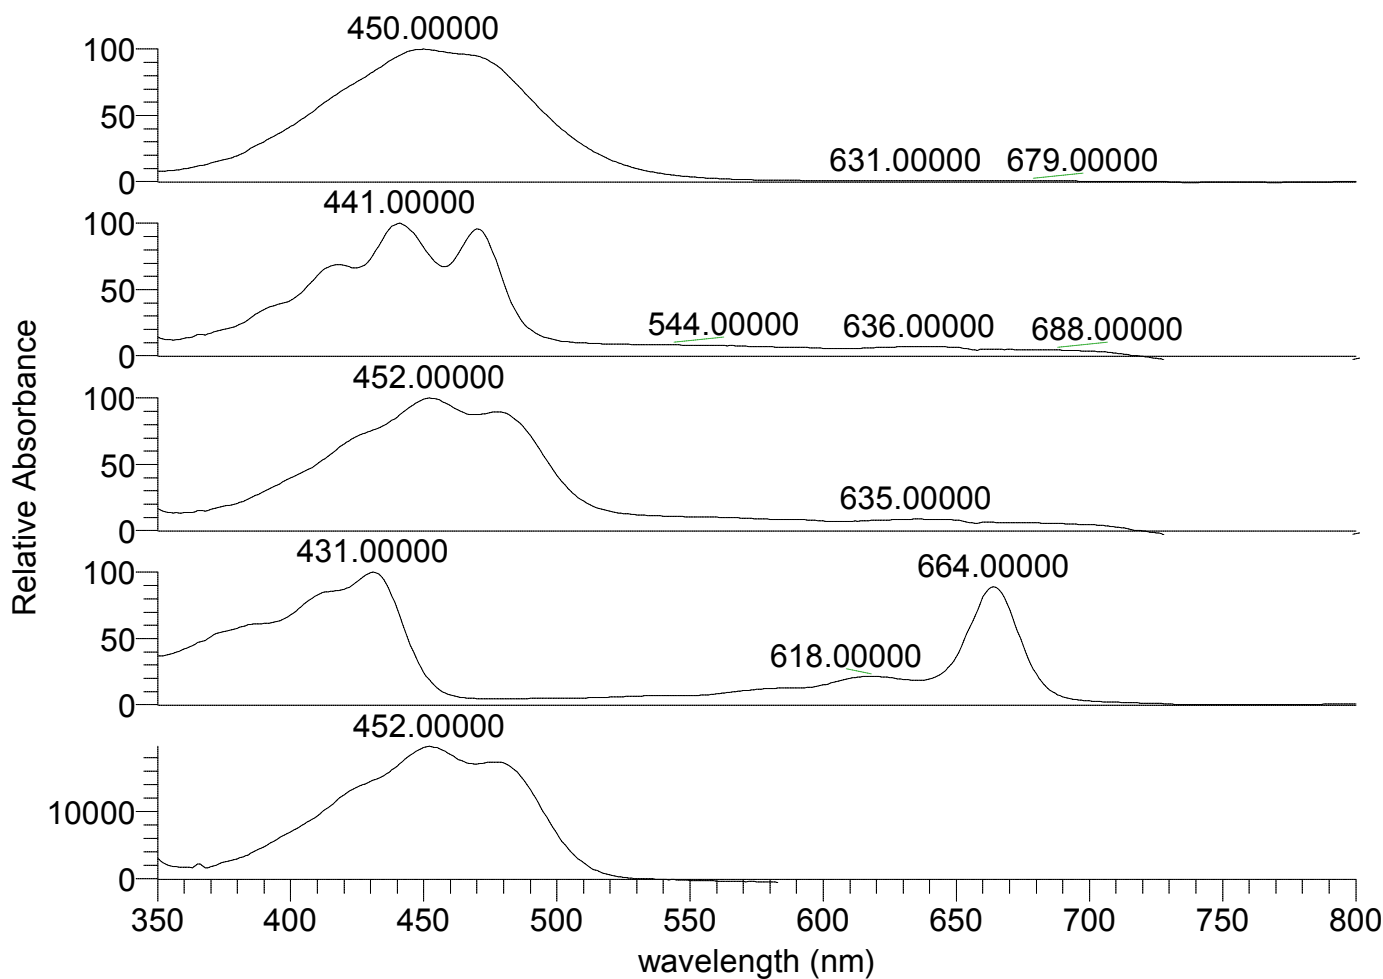

NL:  
1.80E5  
102#6219  
RT: 20.73  
AV: 1  
NL:  
2.11E4  
102#6514  
RT: 21.71  
AV: 1  
NL:  
2.03E4  
102#7364  
RT: 24.55  
AV: 1  
NL:  
1.86E5  
102#10831  
RT: 36.10  
AV: 1  
NL:  
1.96E4  
102#13068  
RT: 43.56  
AV: 1

Supplement: Data_Sheet_1.zip [file Muestra102_HPLC-UV.pdf › Carotenoids/Muestra102_HPLC-UV.pdf]

RT: 0.00 - 61.20

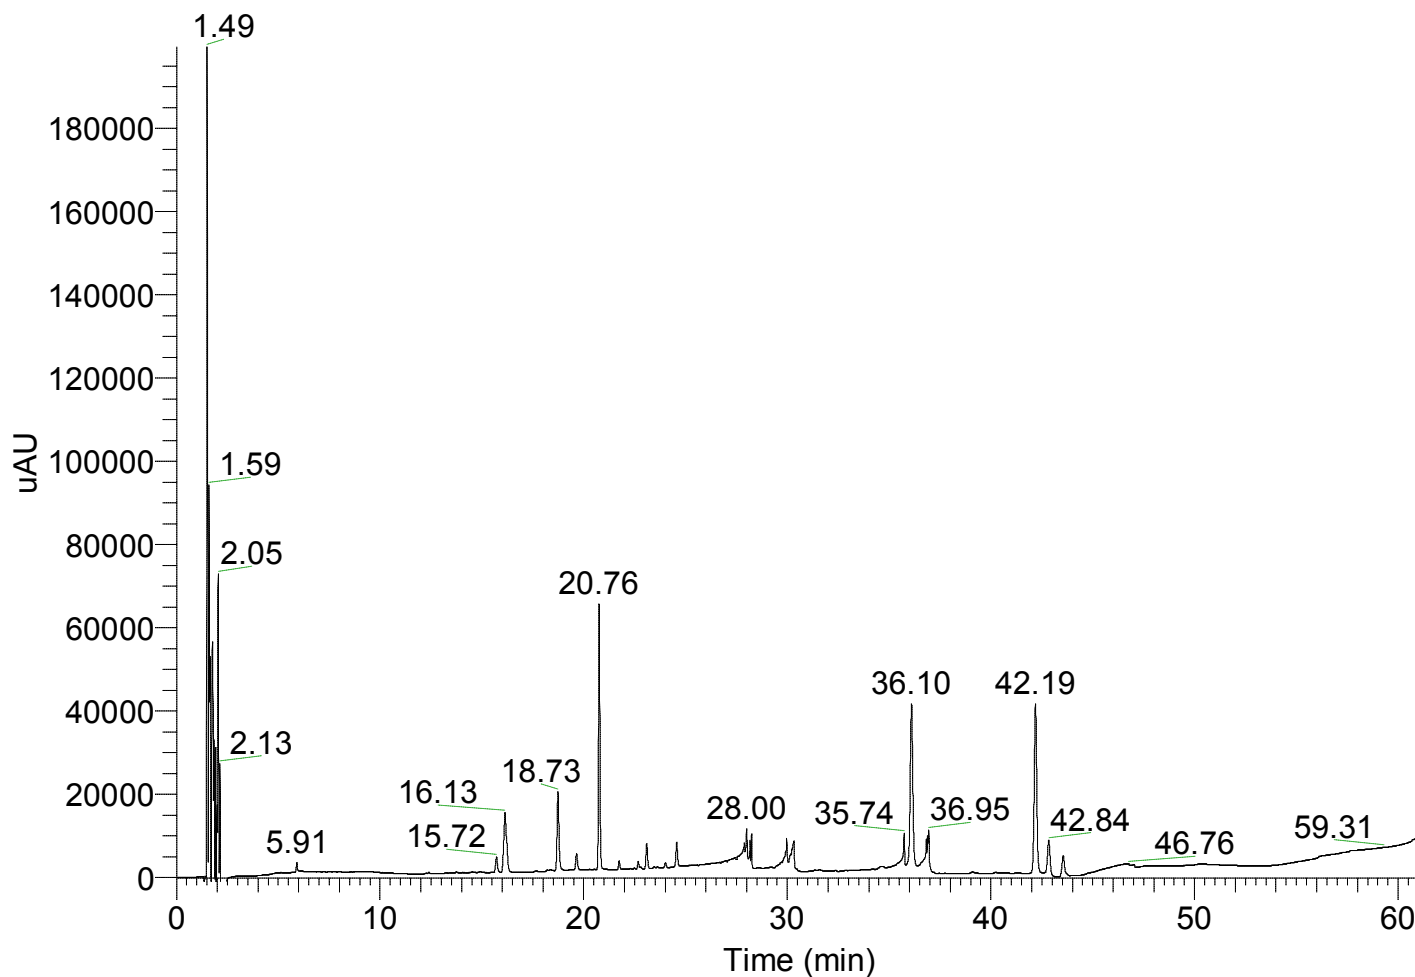

NL:  
1.99E5  
Total Scan  
PDA 103

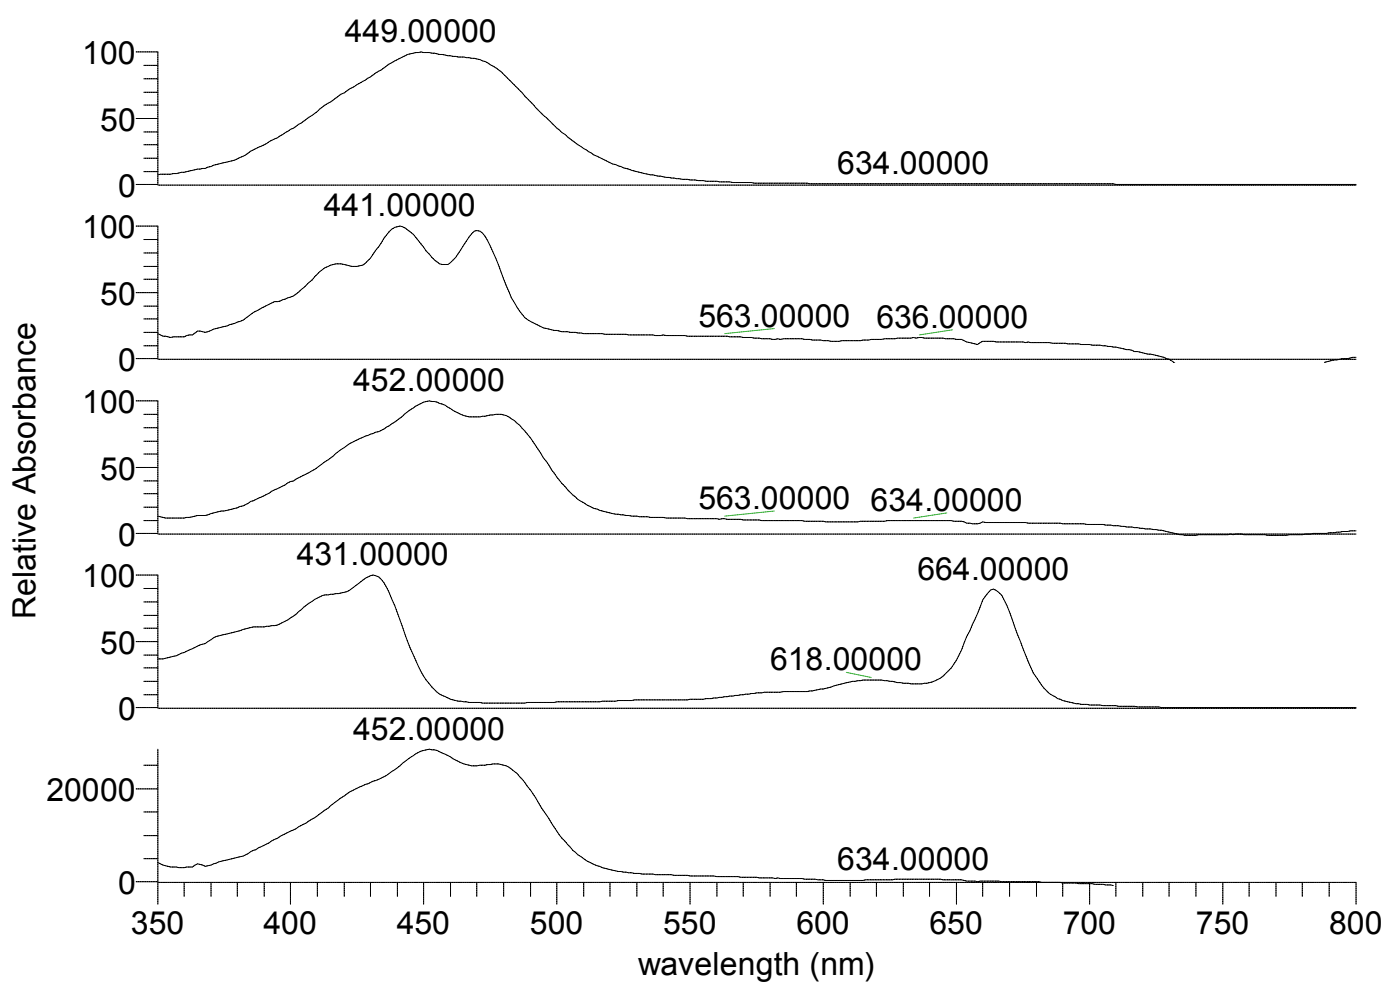

NL:  
3.02E5  
103#6228  
RT: 20.76  
AV: 1  
NL:  
1.61E4  
103#6523  
RT: 21.74  
AV: 1  
NL:  
3.45E4  
103#7368  
RT: 24.56  
AV: 1  
NL:  
1.76E5  
103#10830  
RT: 36.10  
AV: 1  
NL:  
2.84E4  
103#13064  
RT: 43.55  
AV: 1

Supplement: Data_Sheet_1.zip [file Muestra103_HPLC-UV.pdf › Carotenoids/Muestra103_HPLC-UV.pdf]

MUESTRA D


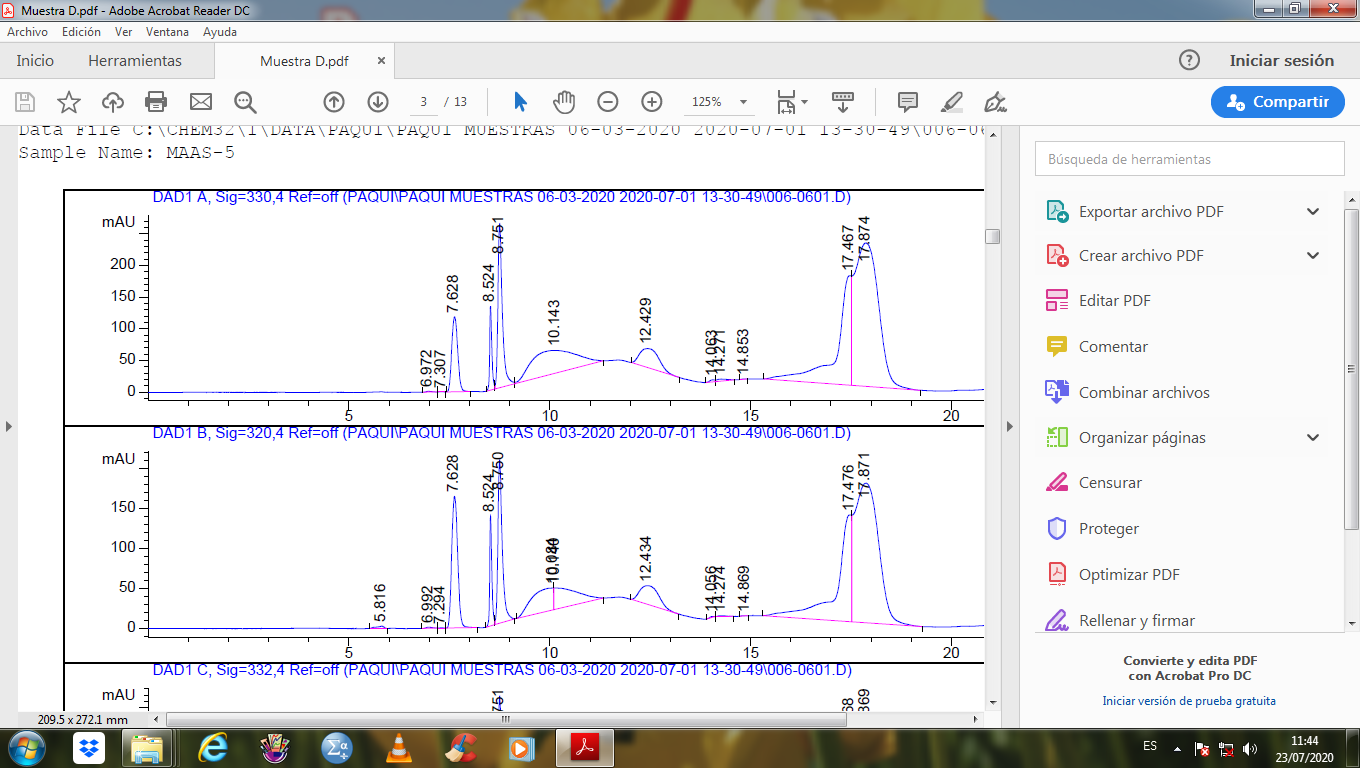


A 330 nm


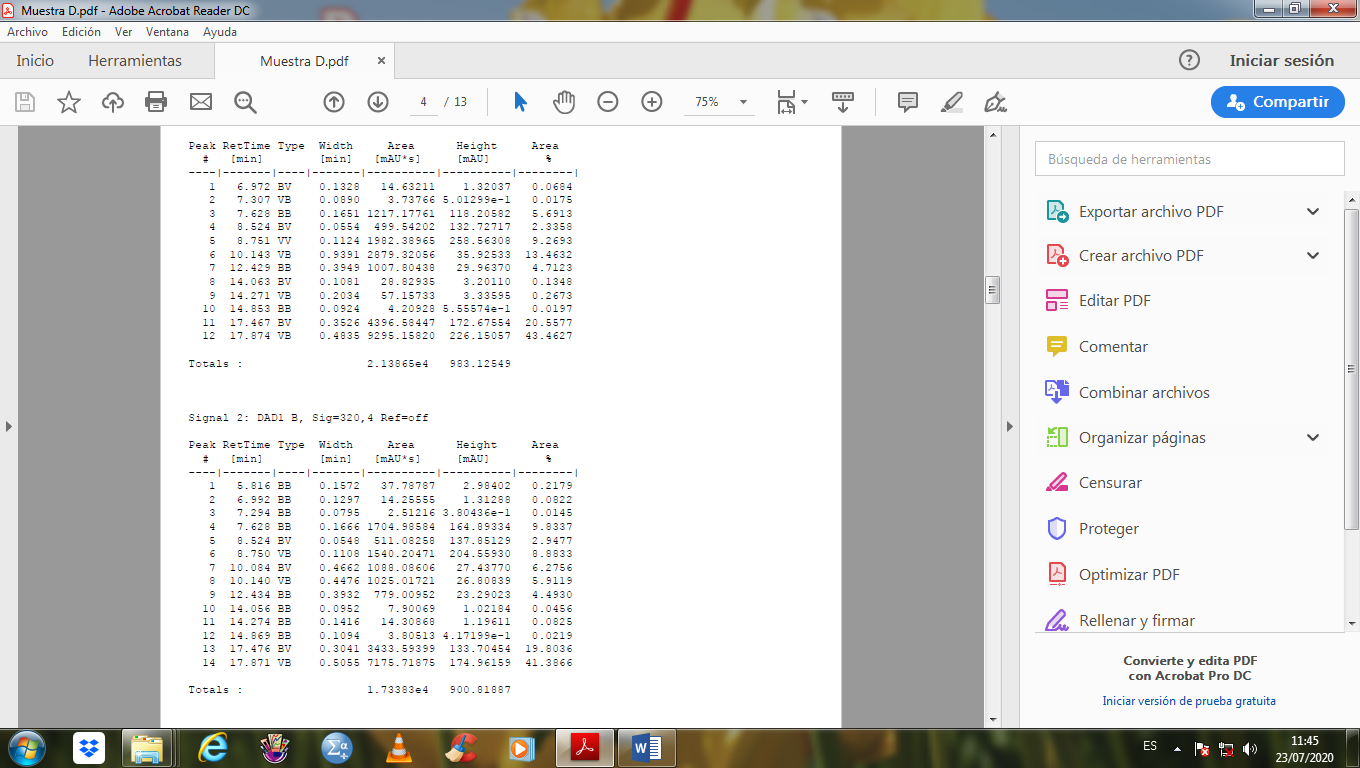

Supplement: Data_Sheet_1.zip [file MUESTRA D.docx]

MUESTRA E


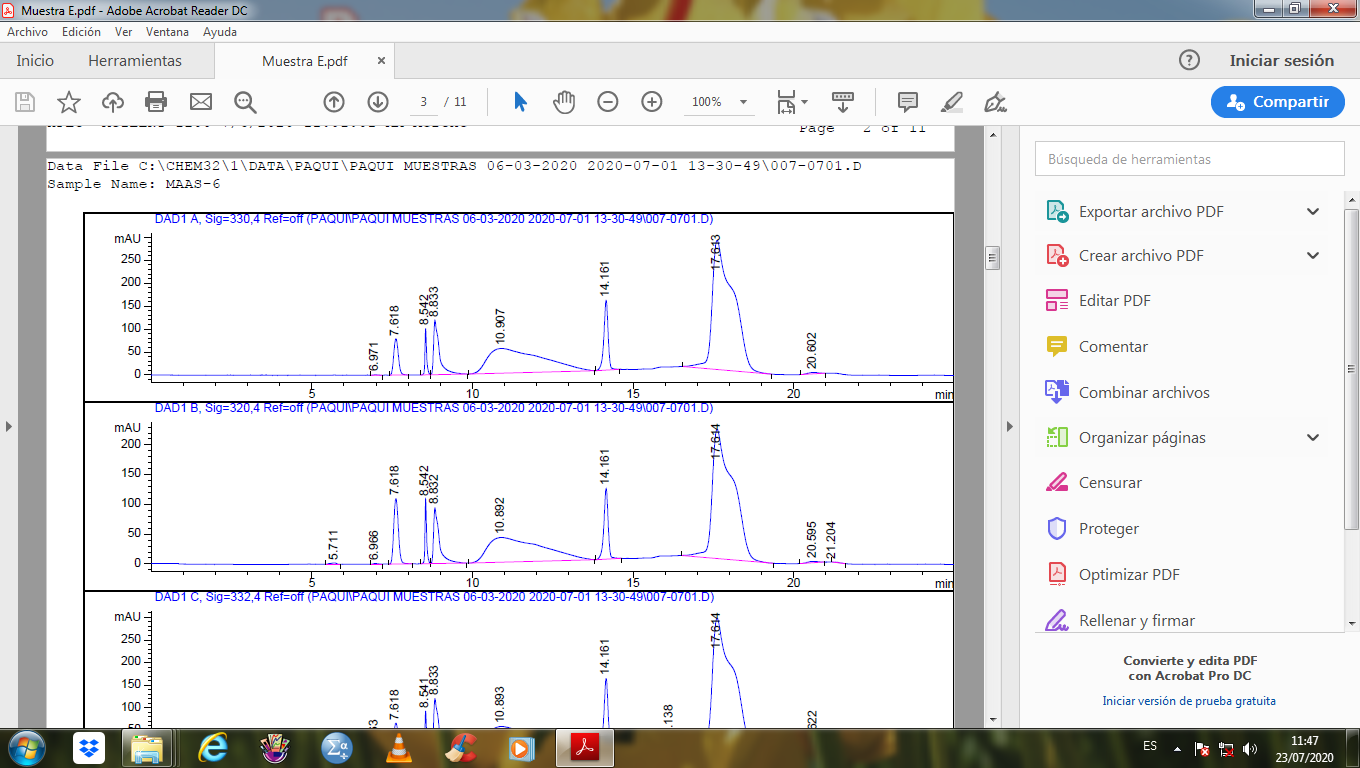


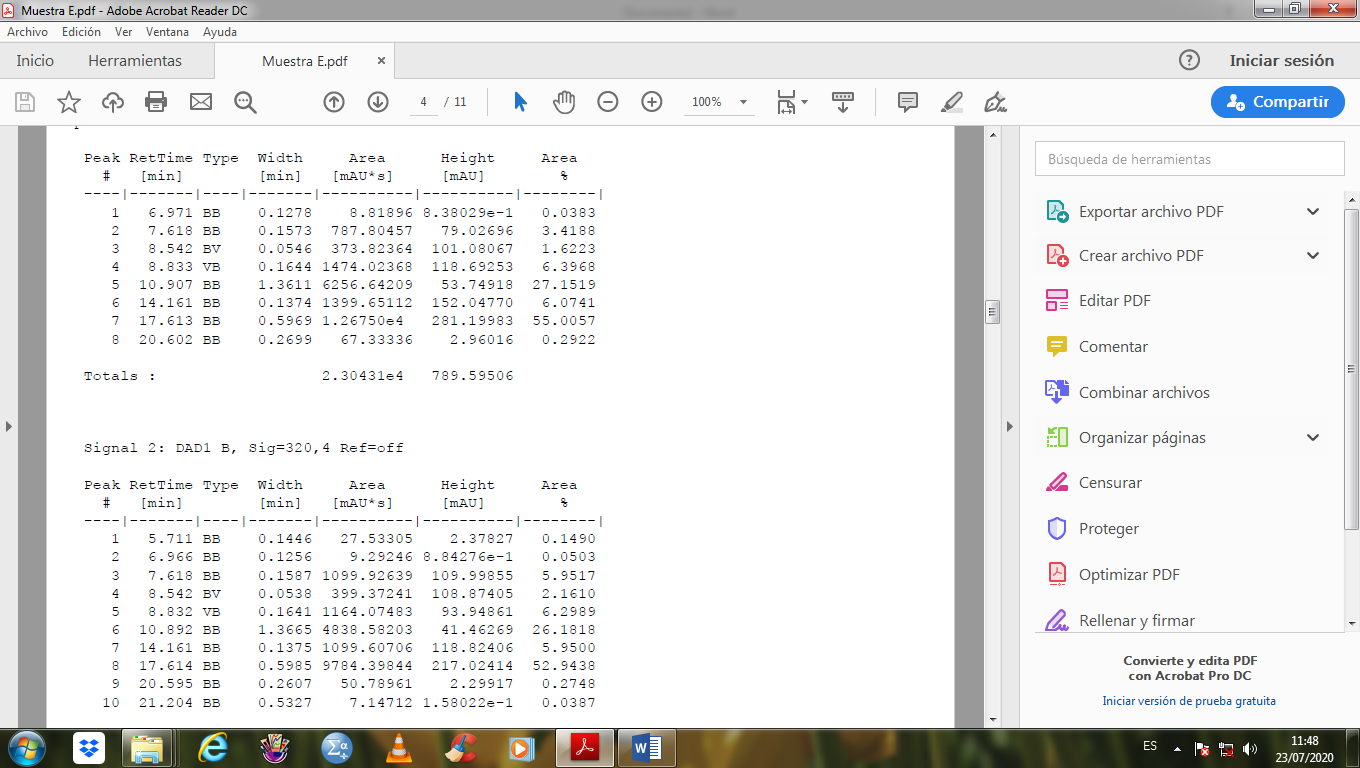

Supplement: Data_Sheet_1.zip [file MUESTRA E.docx]

RT: 0.00 - 61.20

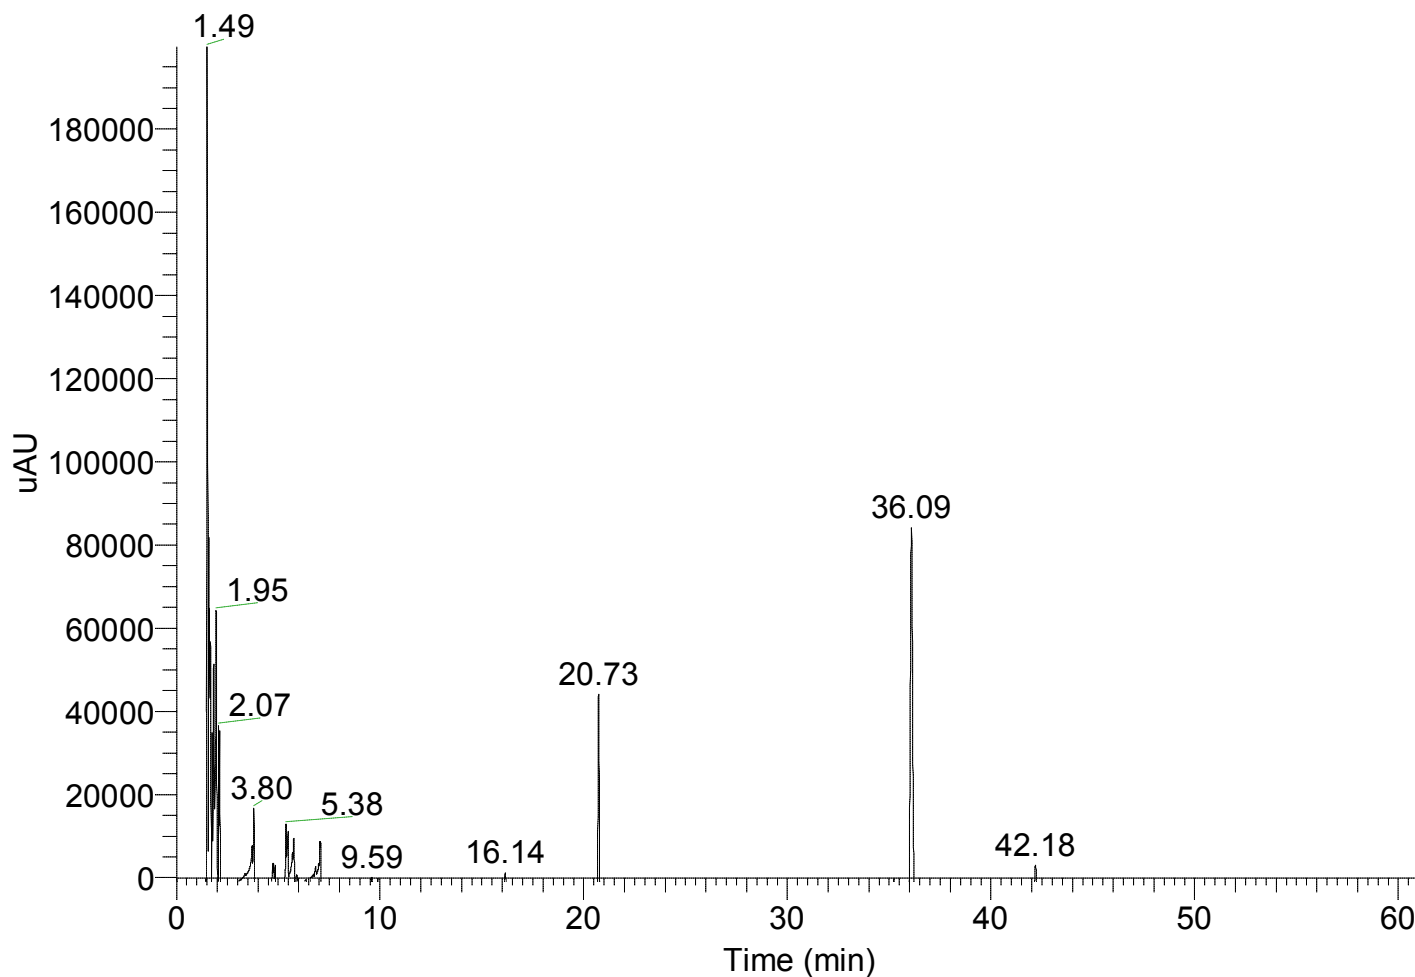

NL:  
2.00E5  
Total Scan  
PDA 104

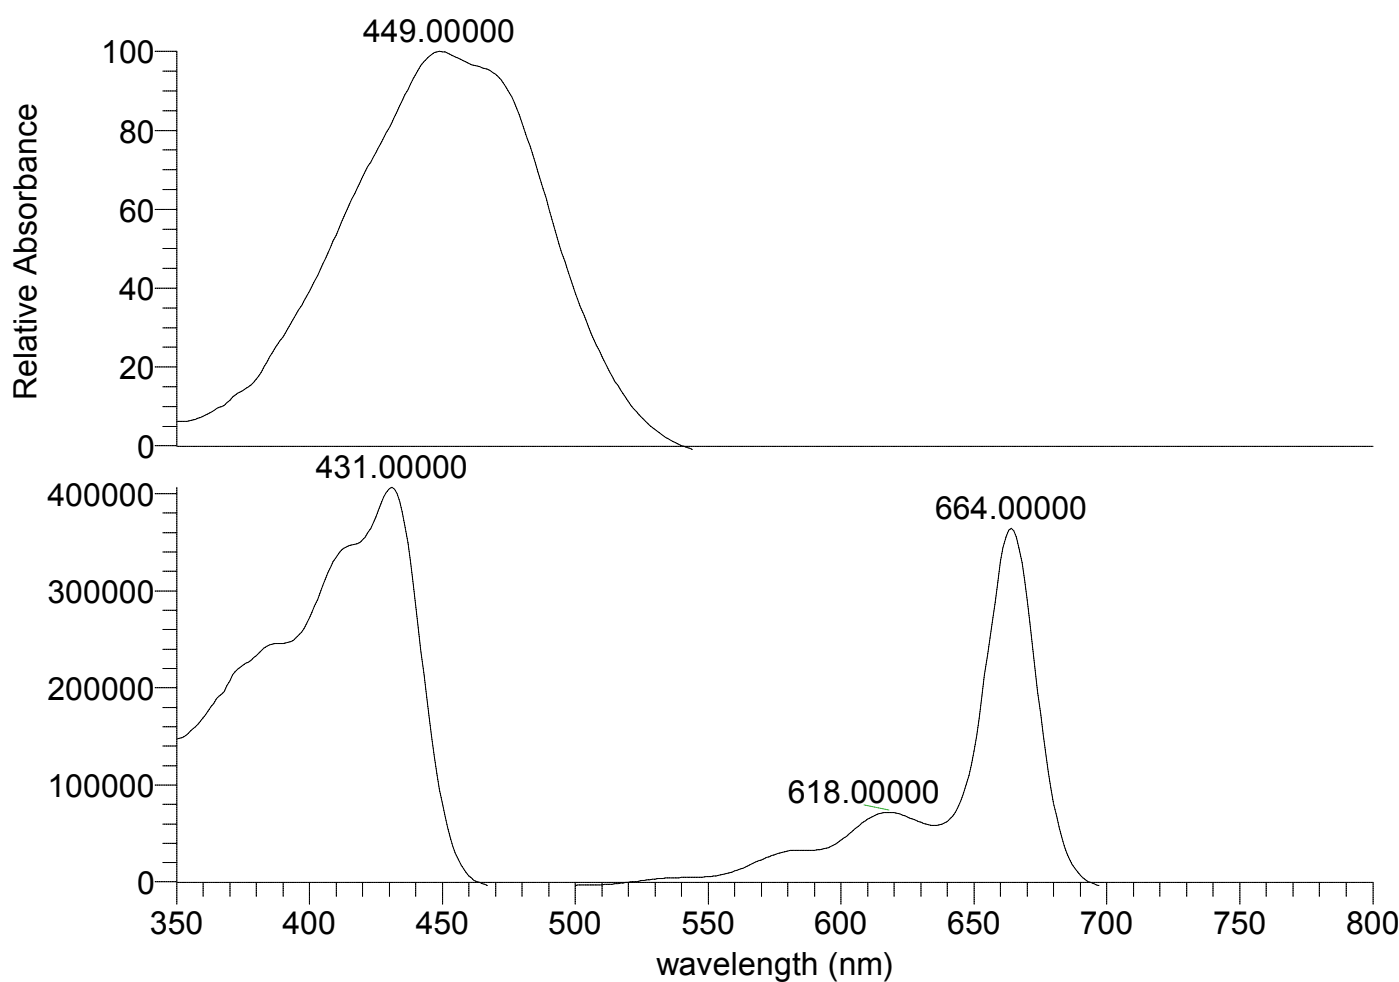

NL:  
2.50E5  
104#6218  
RT: 20.73  
AV: 1

NL:  
4.06E5  
104#10827  
RT: 36.09  
AV: 1

Supplement: Data_Sheet_1.zip [file Muestra104_HPLC-UV.pdf › Carotenoids/Muestra104_HPLC-UV.pdf]

MUESTRA G


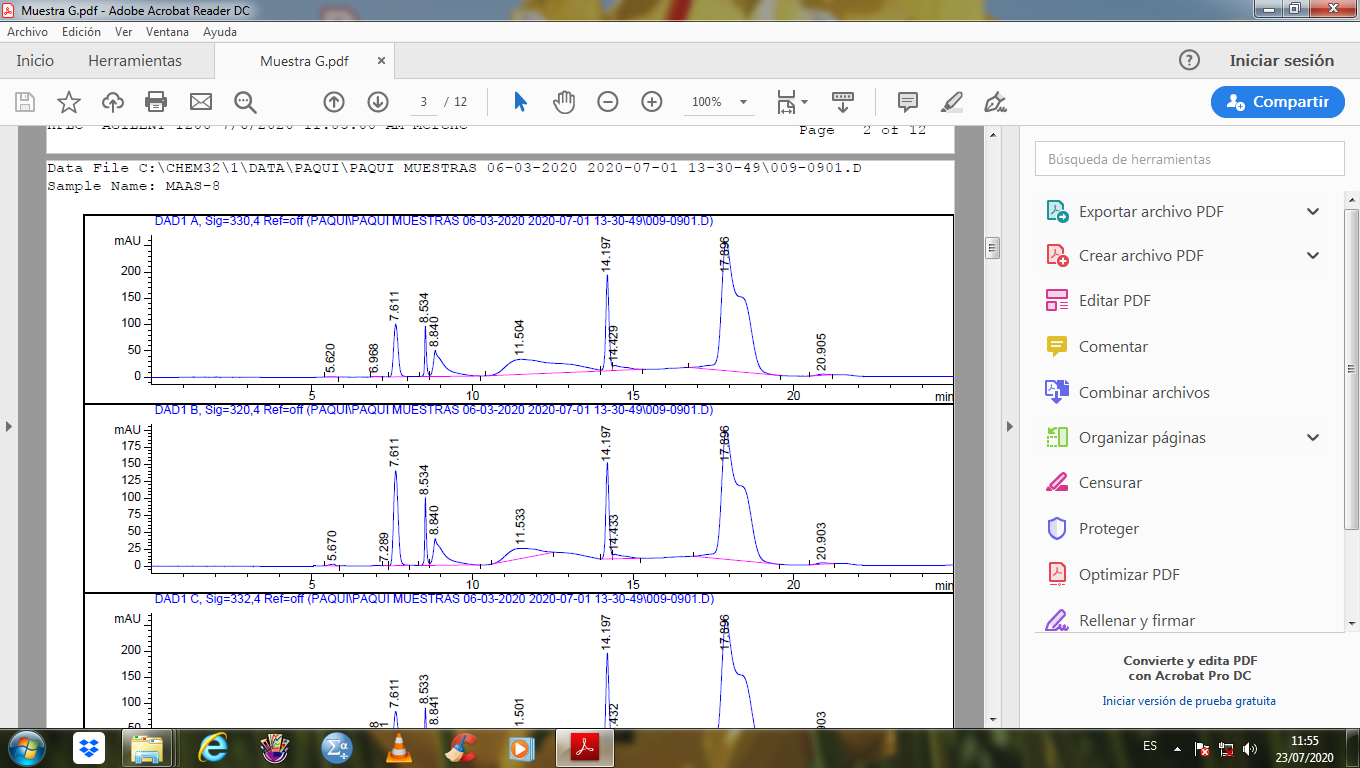


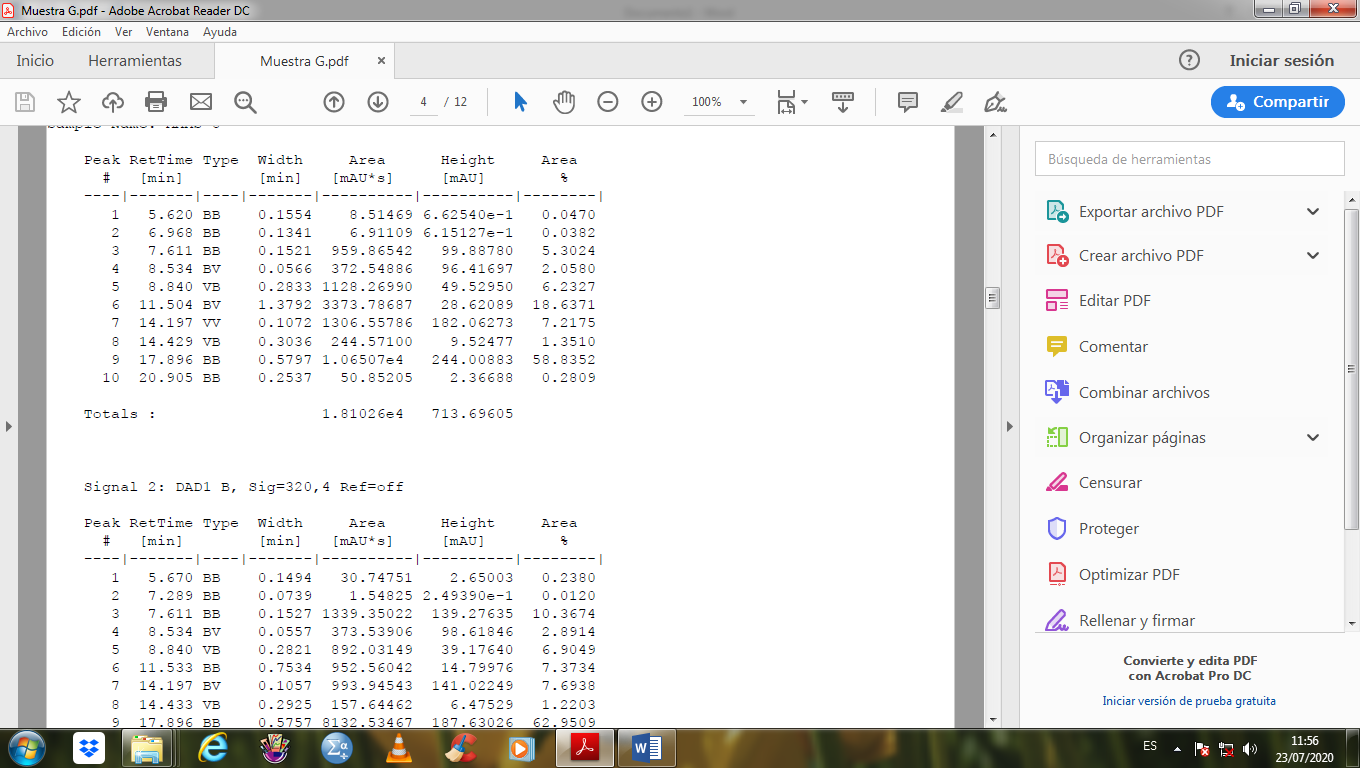

Supplement: Data_Sheet_1.zip [file MUESTRA G.docx]

RT: 0.00 - 61.20

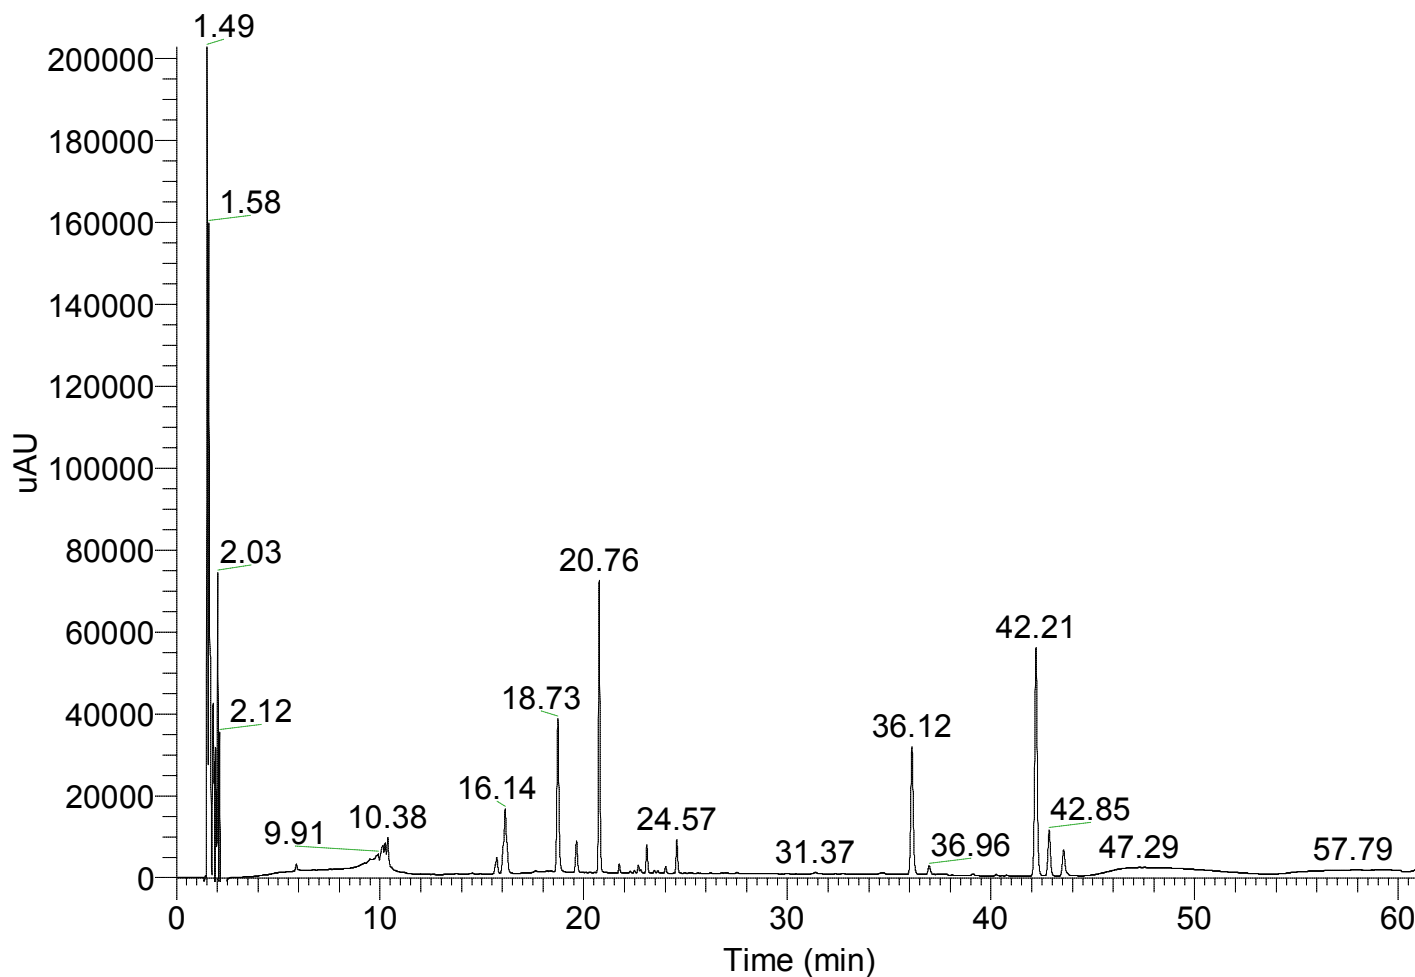

NL:  
2.03E5  
Total Scan  
PDA 105

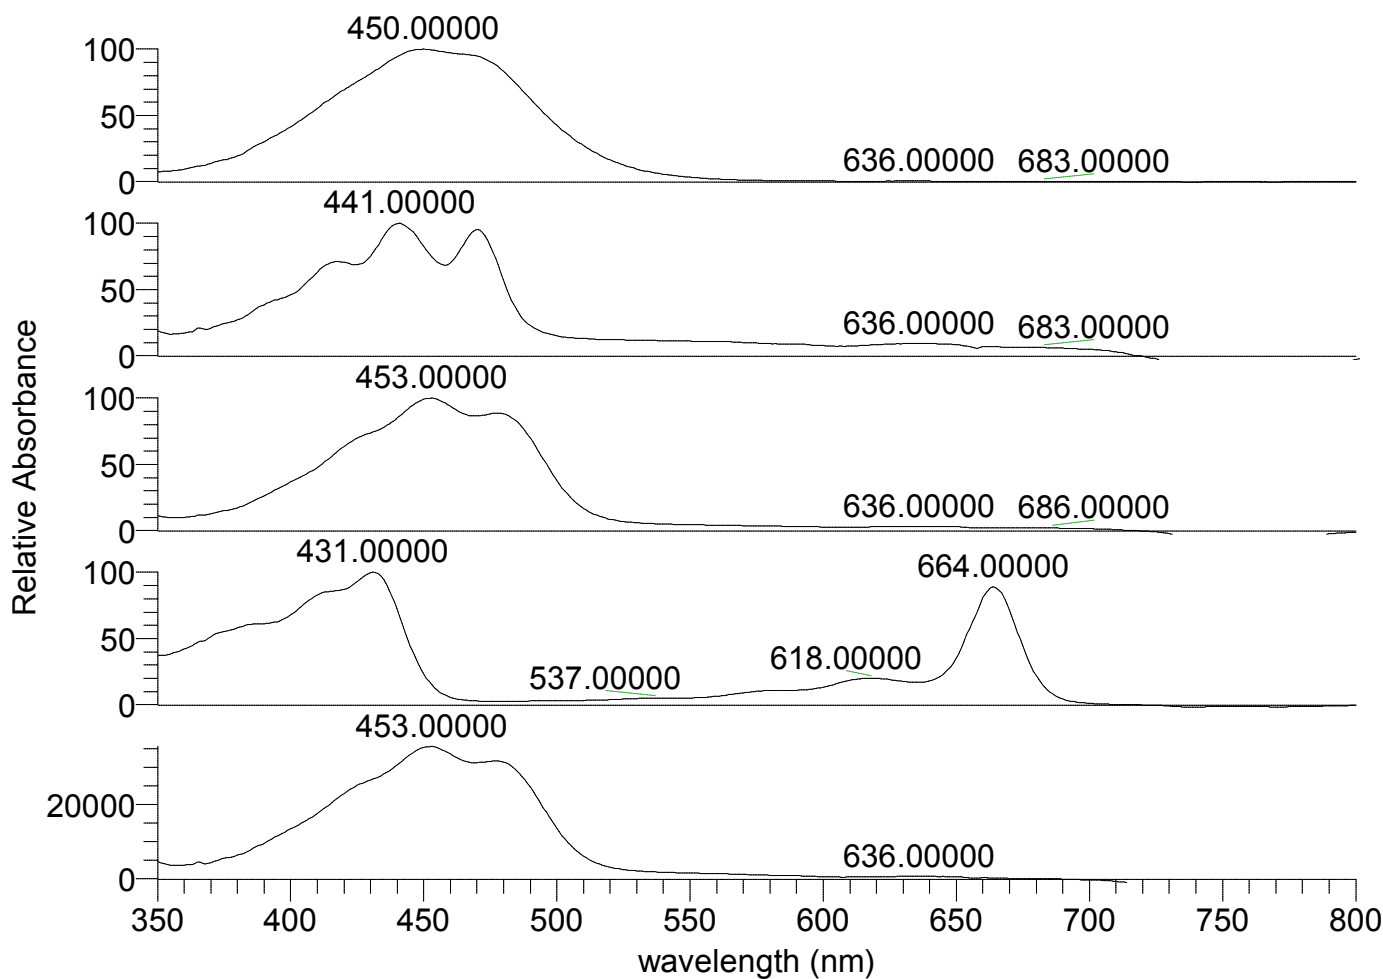

NL:  
3.37E5  
105#6228  
RT: 20.76  
AV: 1  
NL:  
1.62E4  
105#6523  
RT: 21.74  
AV: 1  
NL:  
4.58E4  
105#7371  
RT: 24.57  
AV: 1  
NL:  
1.39E5  
105#10836  
RT: 36.12  
AV: 1  
NL:  
3.57E4  
105#13070  
RT: 43.57  
AV: 1

Supplement: Data_Sheet_1.zip [file Muestra105_HPLC-UV.pdf › Carotenoids/Muestra105_HPLC-UV.pdf]

RT: 0.00 - 61.20

NL:  
2.00E5  
Total Scan  
PDA 106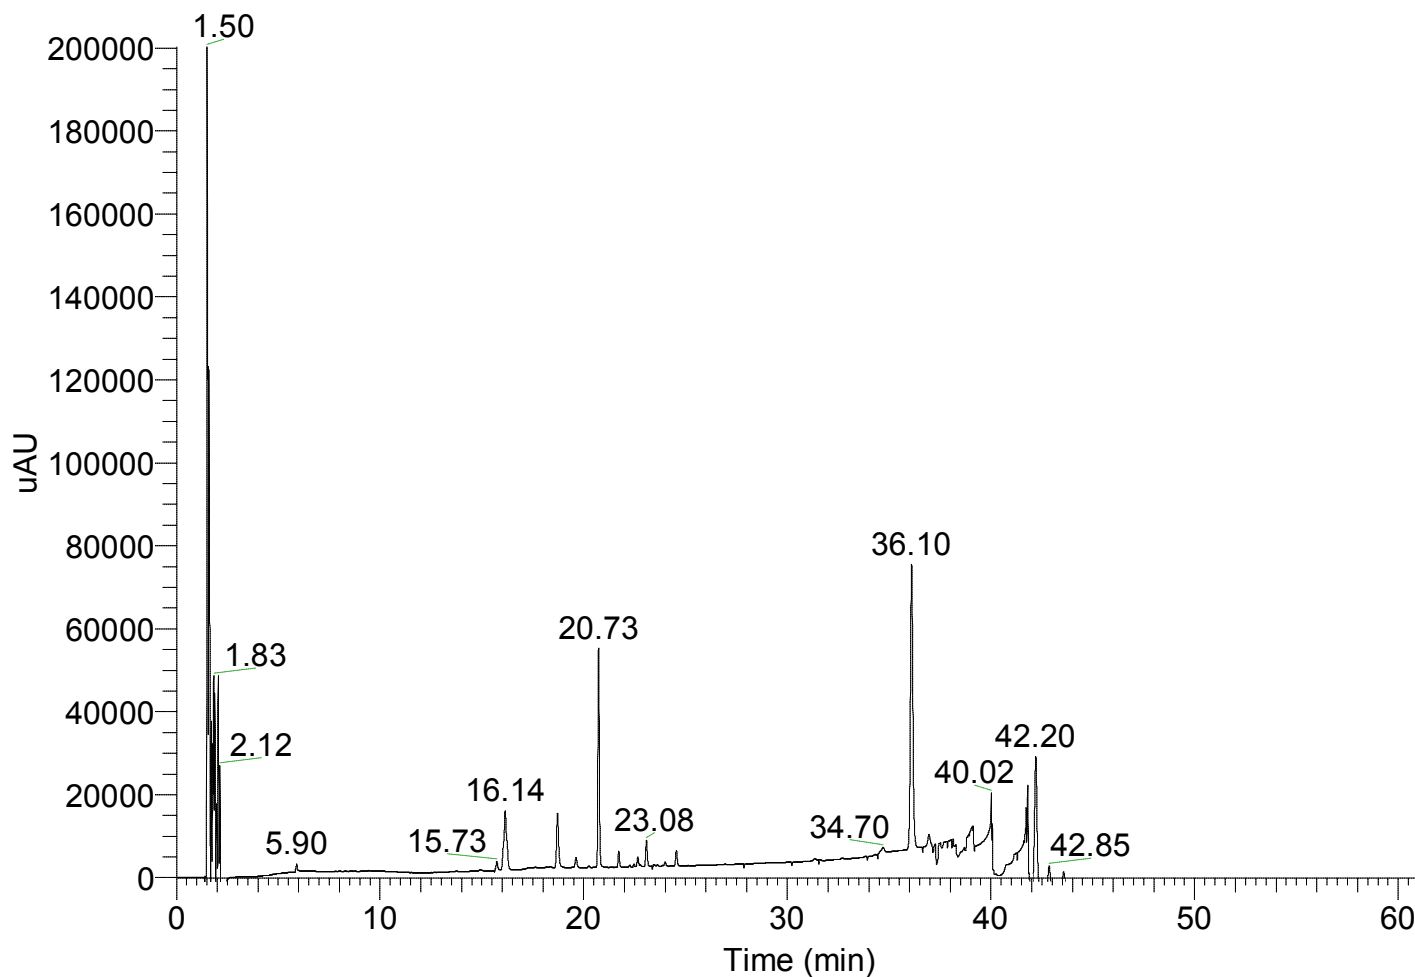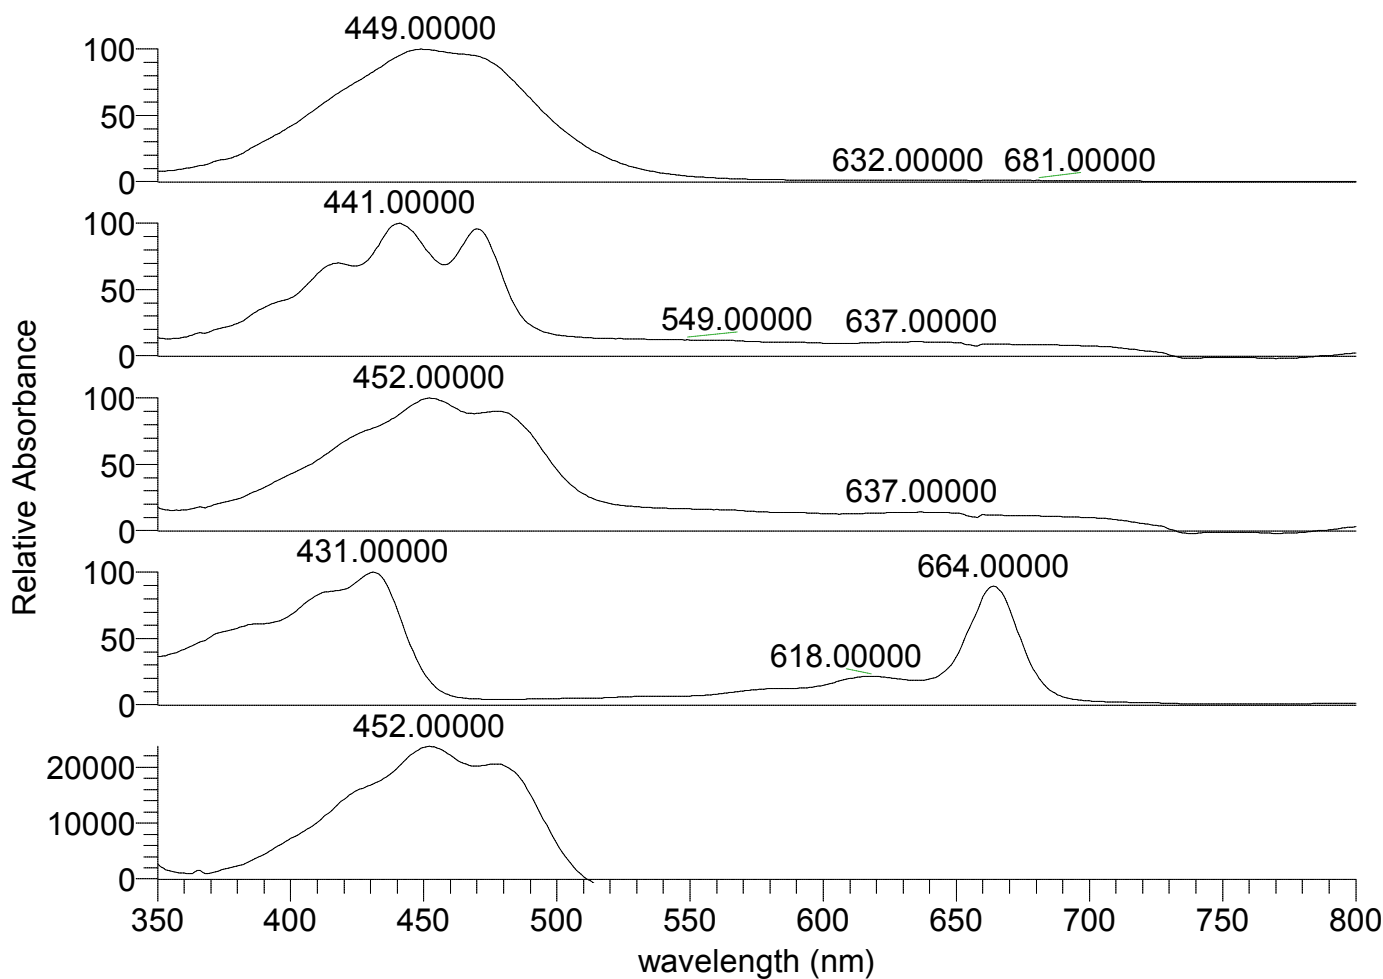

NL:  
2.52E5  
106#6219  
RT: 20.73  
AV: 1

NL:  
2.86E4  
106#6515  
RT: 21.72  
AV: 1

NL:  
2.43E4  
106#7364  
RT: 24.55  
AV: 1

NL:  
3.12E5  
106#10830  
RT: 36.10  
AV: 1

NL:  
2.37E4  
106#13071  
RT: 43.57  
AV: 1

Supplement: Data_Sheet_1.zip [file Muestra106_HPLC-UV.pdf › Carotenoids/Muestra106_HPLC-UV.pdf]

MUESTRA H


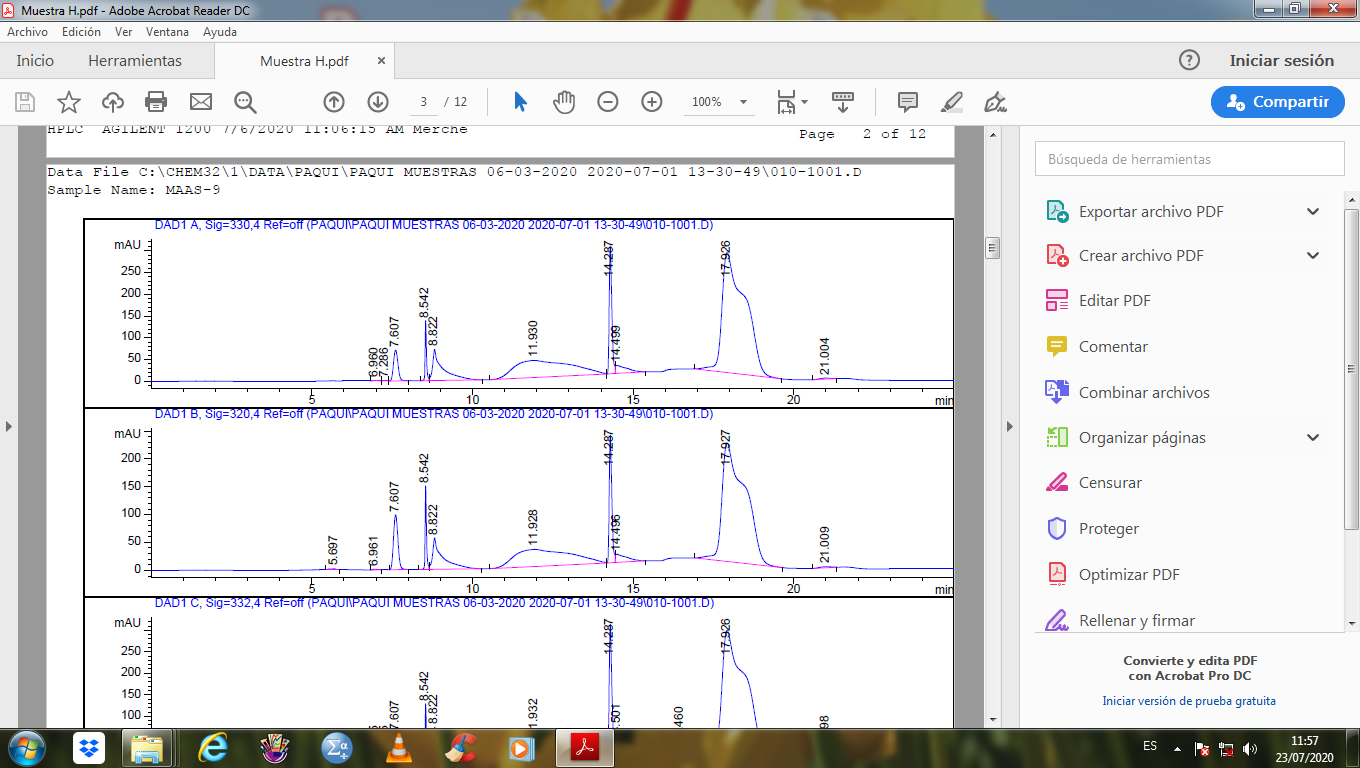


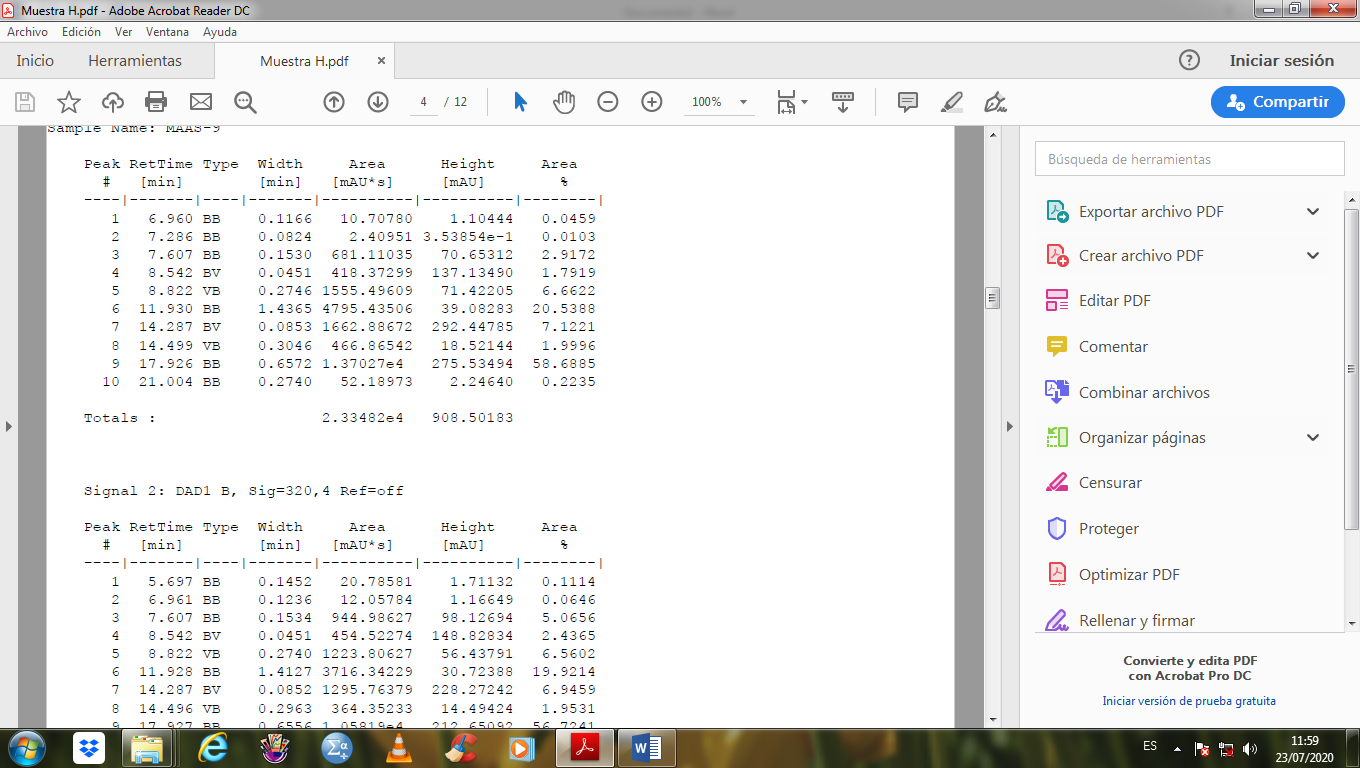

Supplement: Data_Sheet_1.zip [file MUESTRA H.docx]

MUESTRA I


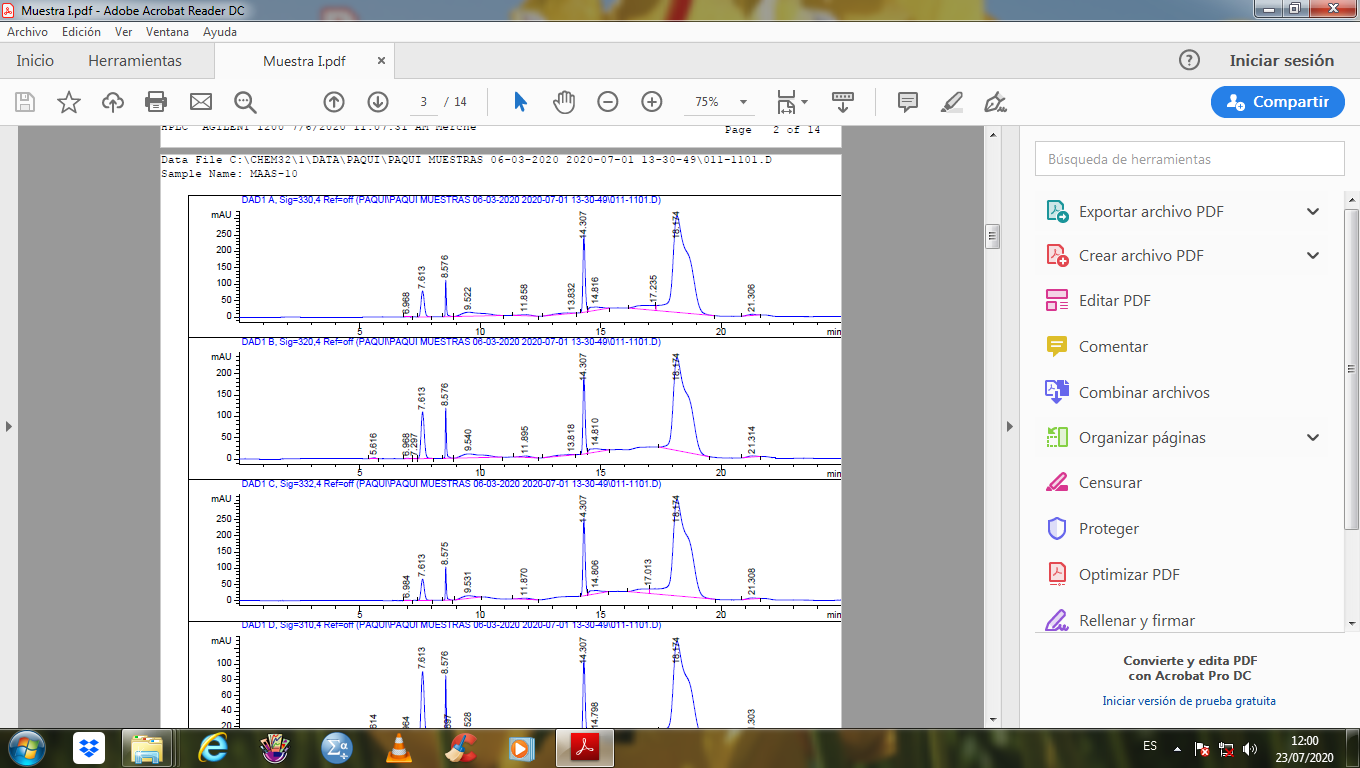


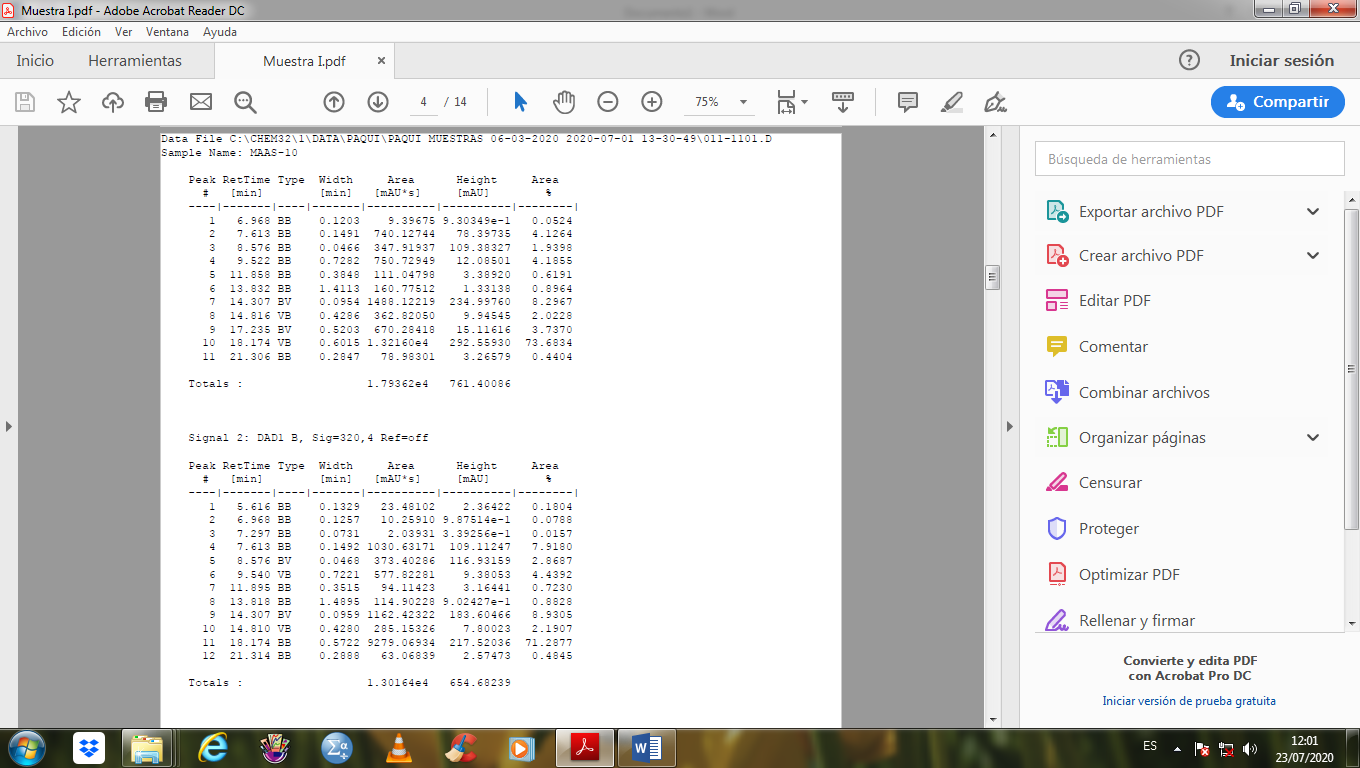

Supplement: Data_Sheet_1.zip [file MUESTRA I.docx]

RT: 0.00 - 61.20

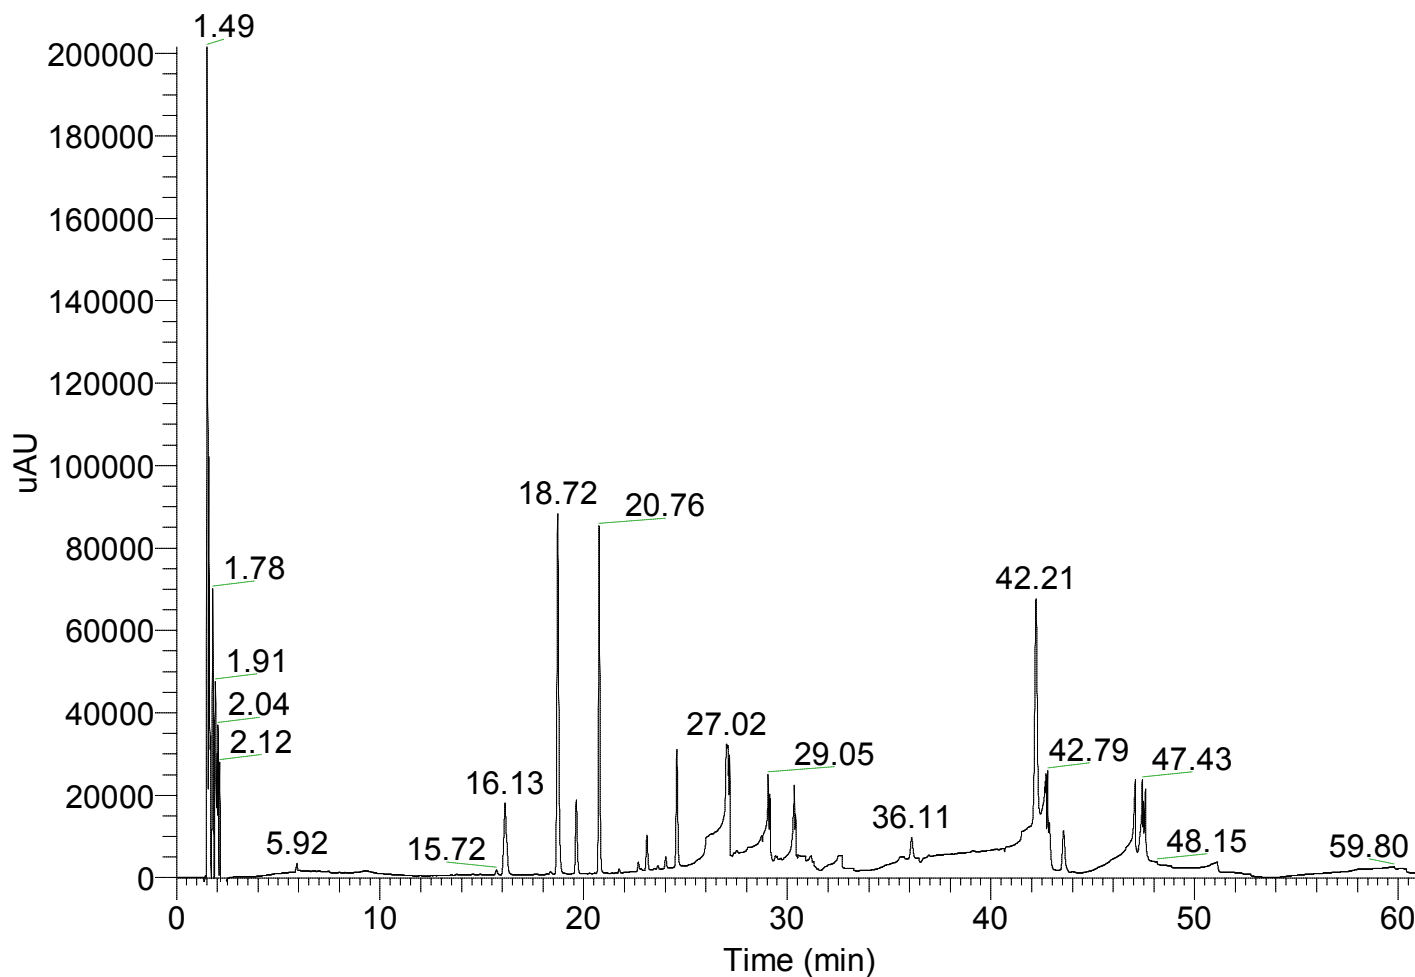

NL:  
2.02E5  
Total Scan  
PDA 107

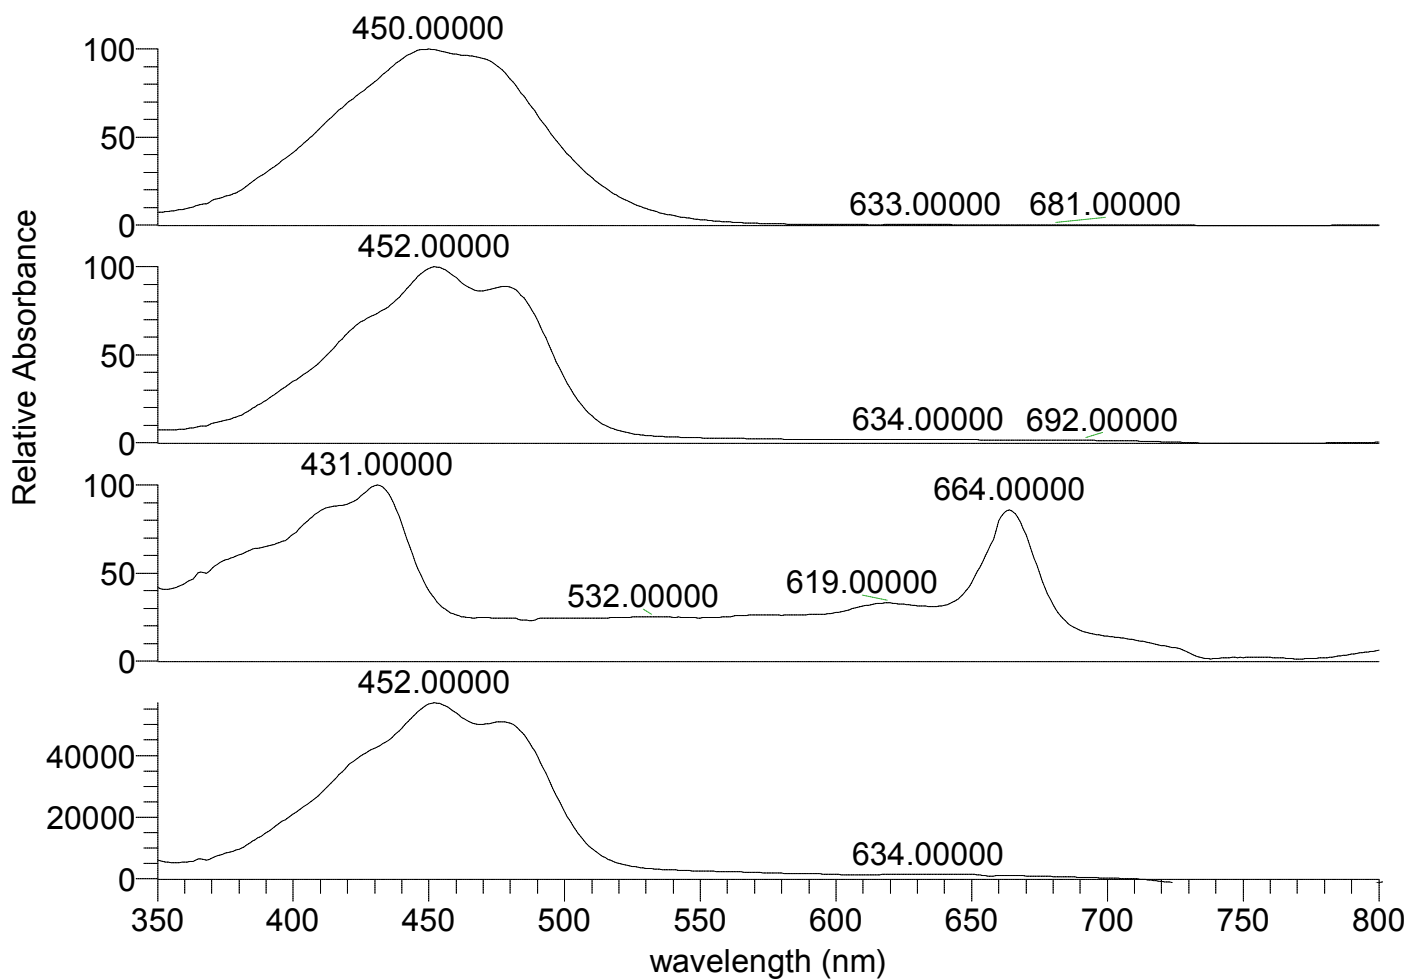

NL:  
3.98E5  
107#6228  
RT: 20.76  
AV: 1

NL:  
1.55E5  
107#7371  
RT: 24.57  
AV: 1

NL:  
2.86E4  
107#10833  
RT: 36.11  
AV: 1

NL:  
5.70E4  
107#13071  
RT: 43.57  
AV: 1

Supplement: Data_Sheet_1.zip [file Muestra107_HPLC-UV.pdf › Carotenoids/Muestra107_HPLC-UV.pdf]

MUESTRA J


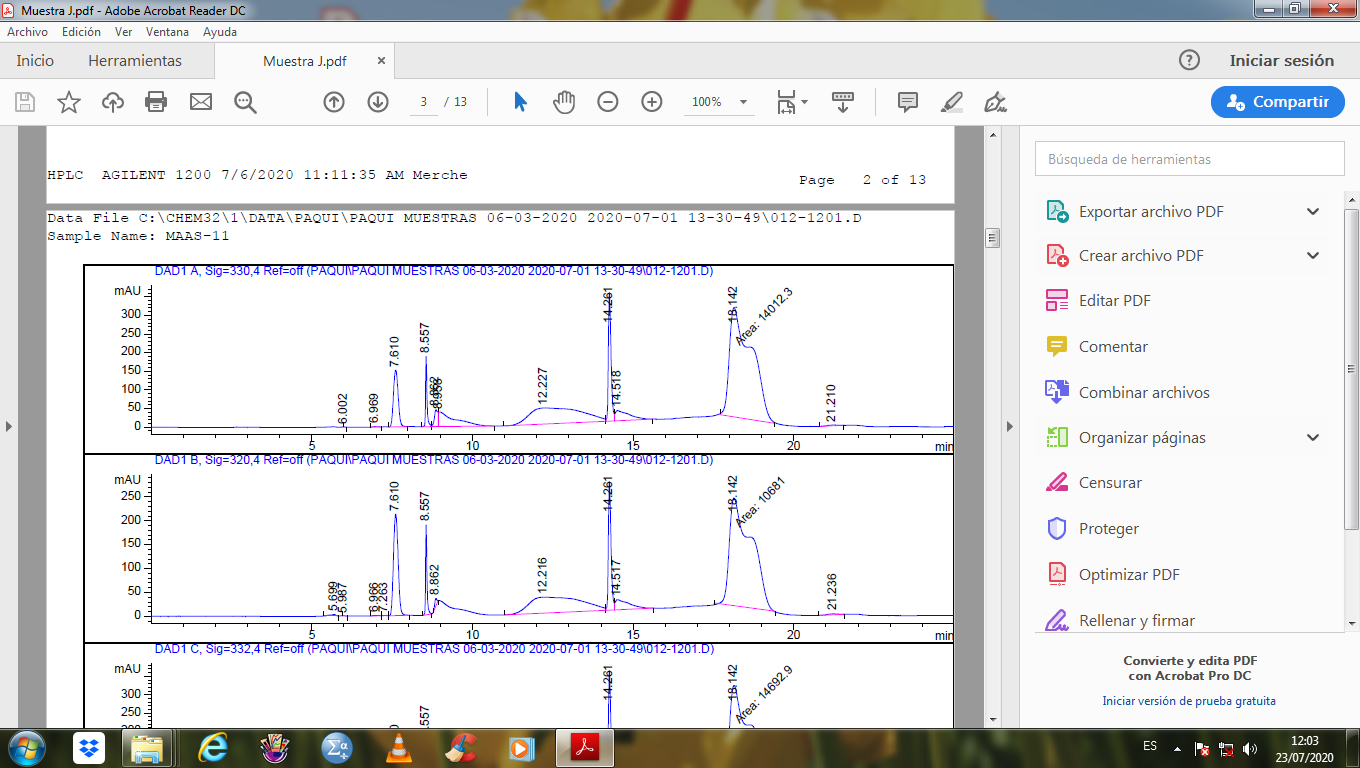


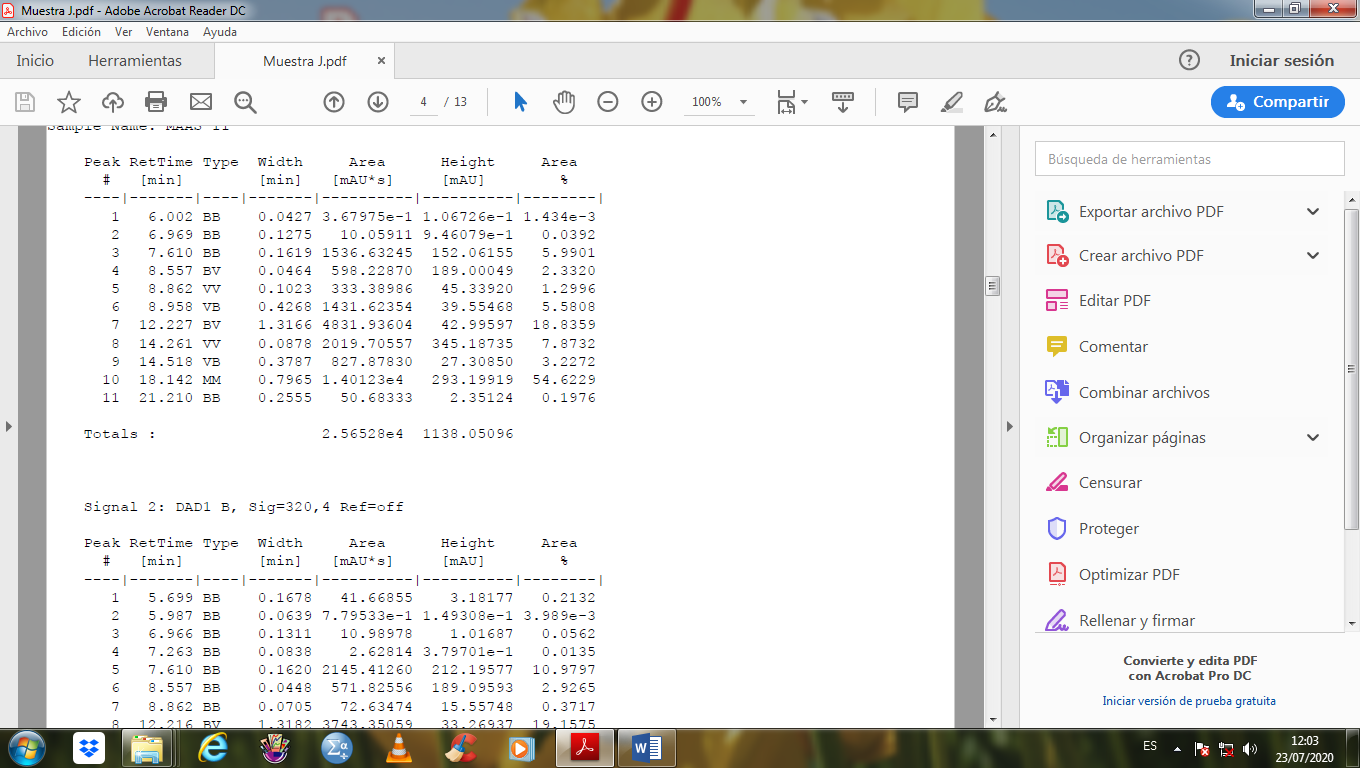

Supplement: Data_Sheet_1.zip [file MUESTRA J.docx]

RT: 0.00 - 61.20

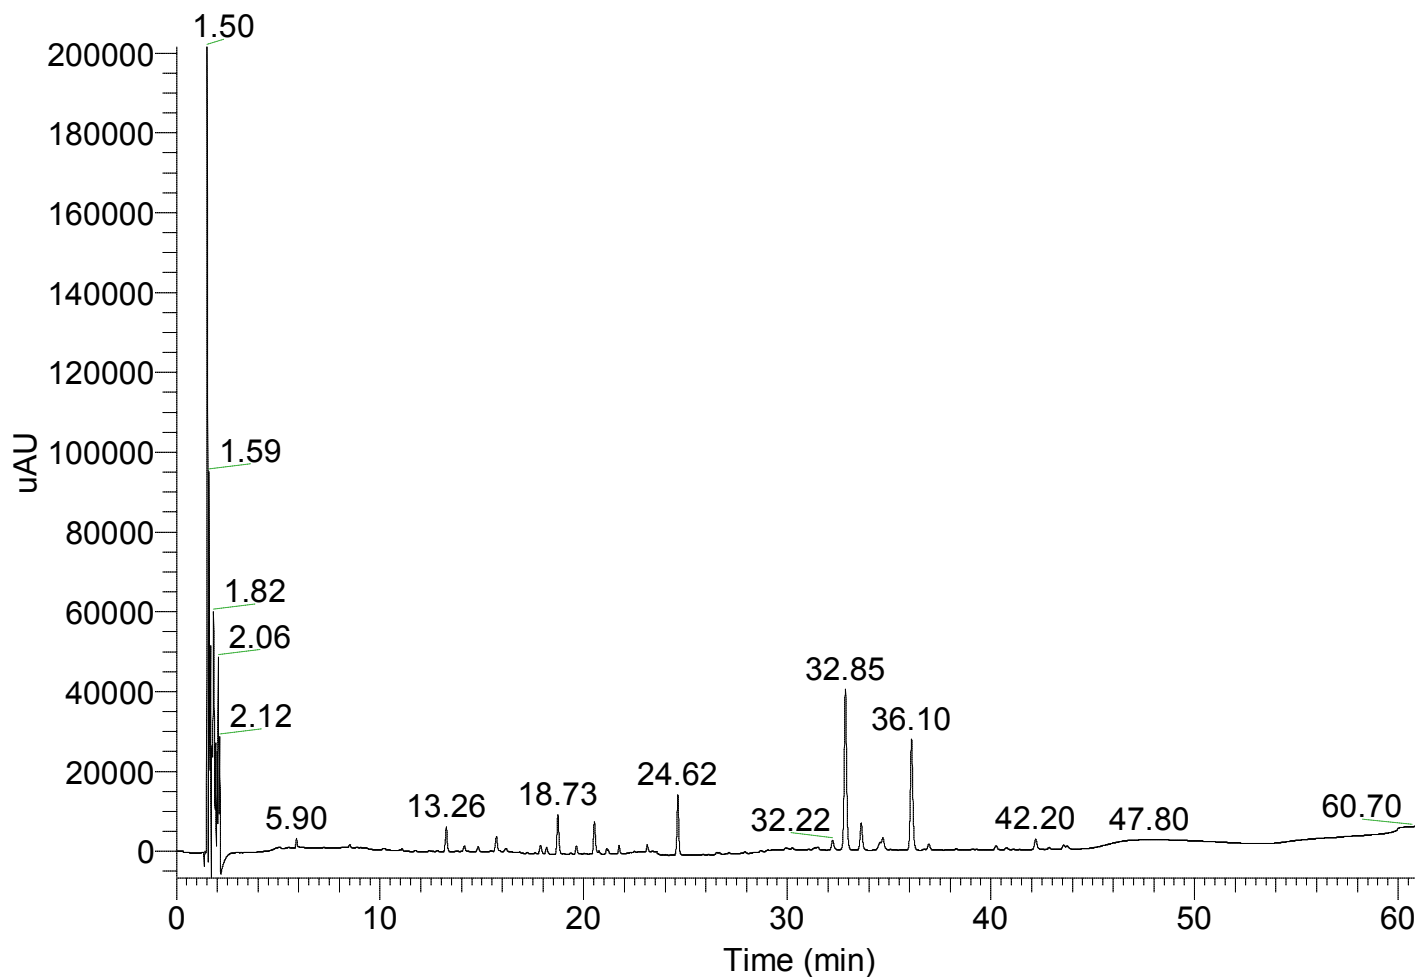

NL:  
2.01E5  
Total Scan  
PDA 109

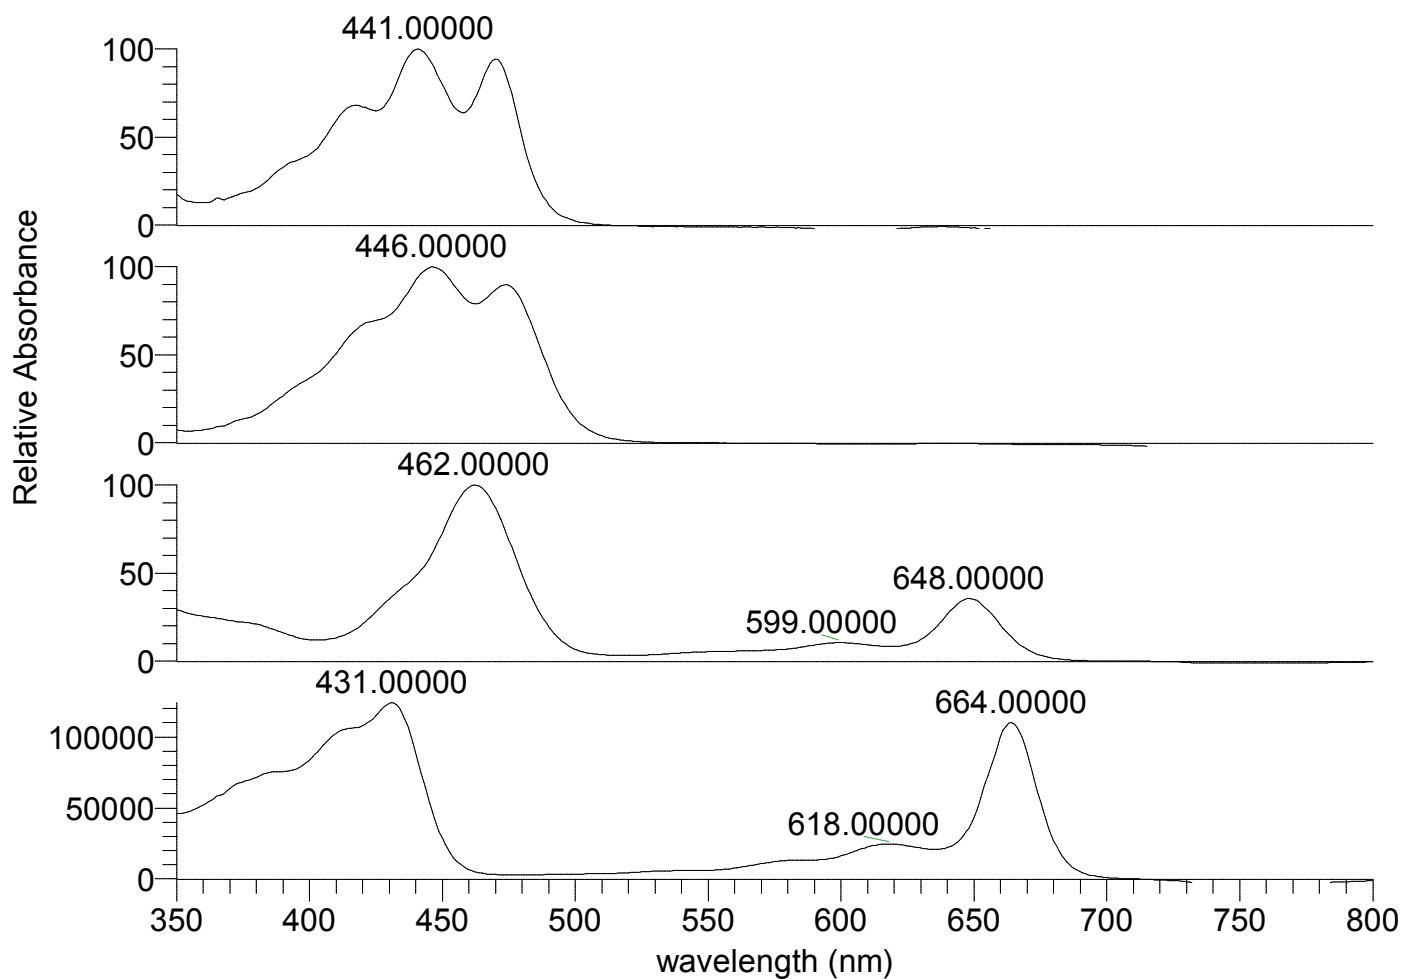

Supplement: Data_Sheet_1.zip [file Muestra109_HPLC-UV.pdf › Carotenoids/Muestra109_HPLC-UV.pdf]

MUESTRA K


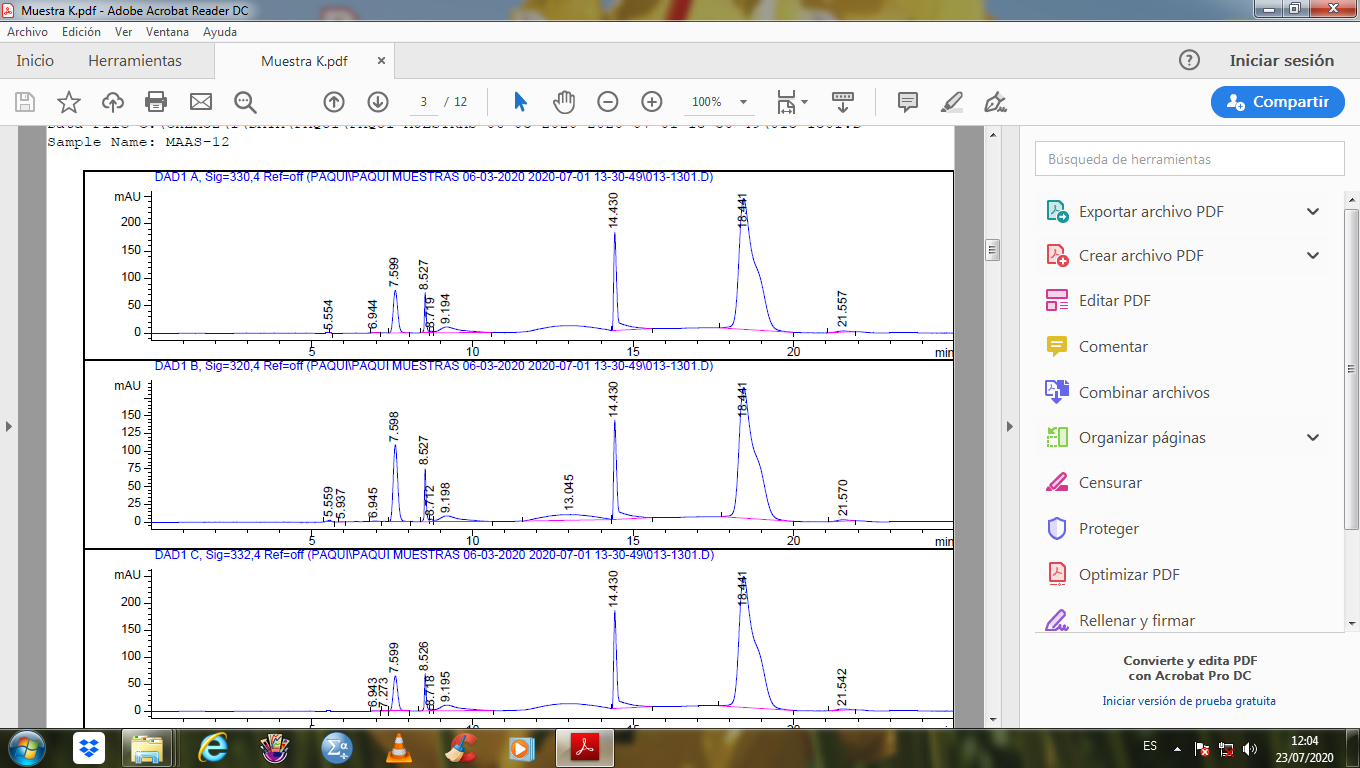


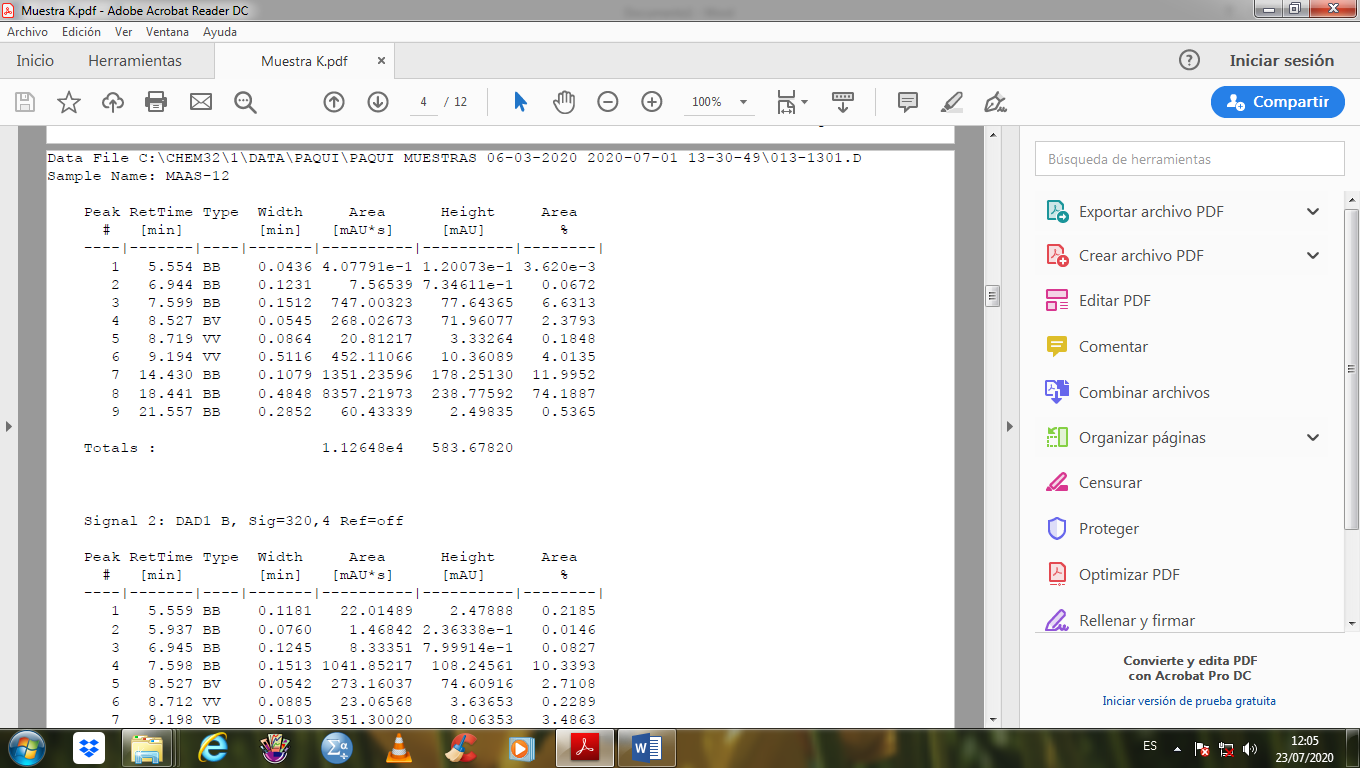

Supplement: Data_Sheet_1.zip [file MUESTRA K.docx]

RT: 0.00 - 61.20

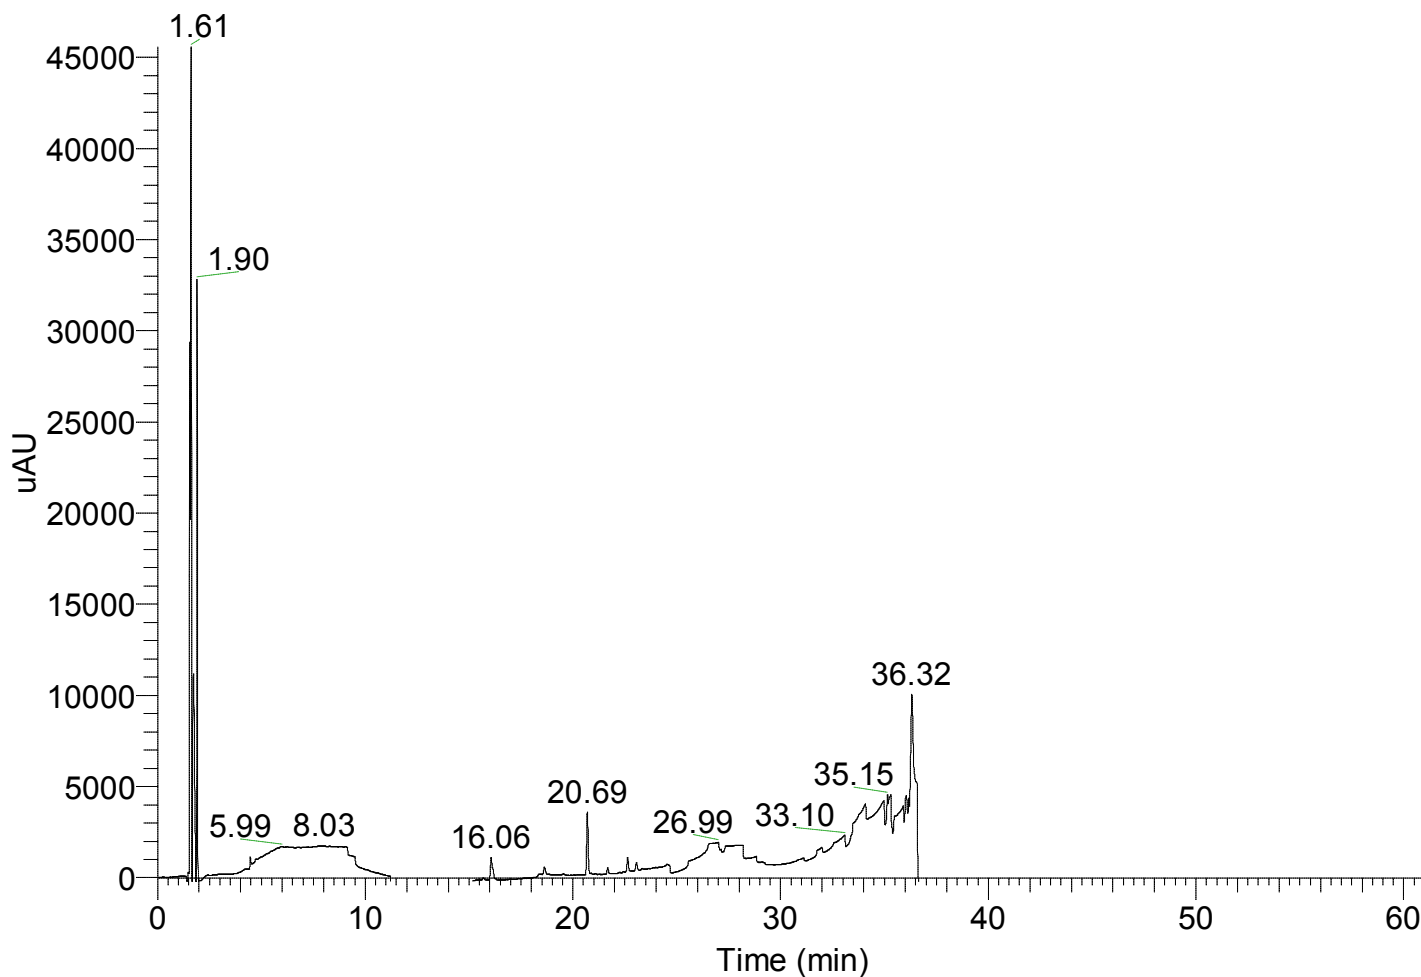

NL:  
4.56E4  
Total Scan  
PDA 10

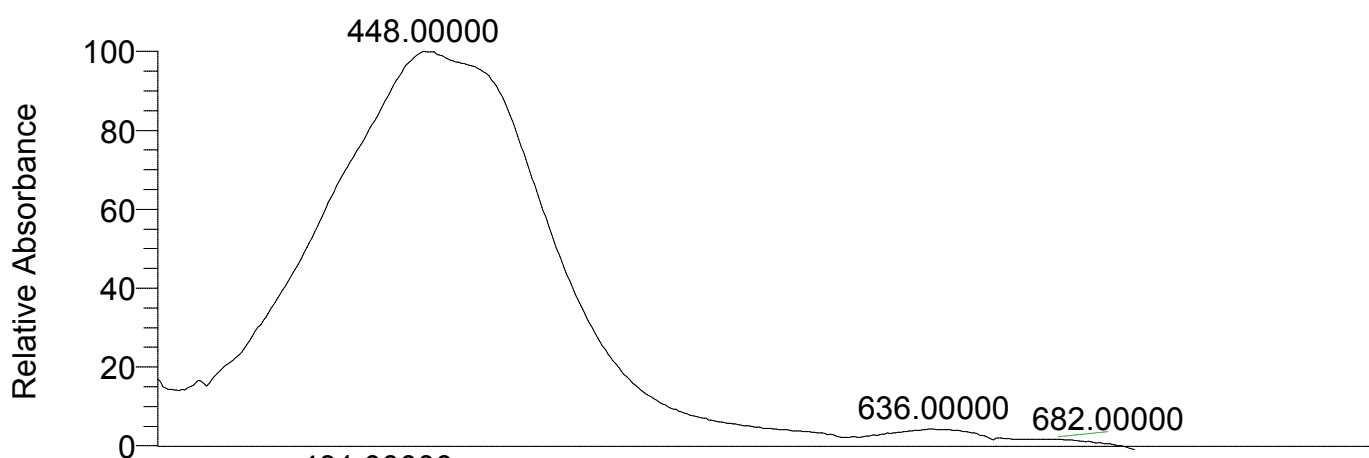

NL:  
1.68E4  
10#6207  
RT: 20.69  
AV: 1

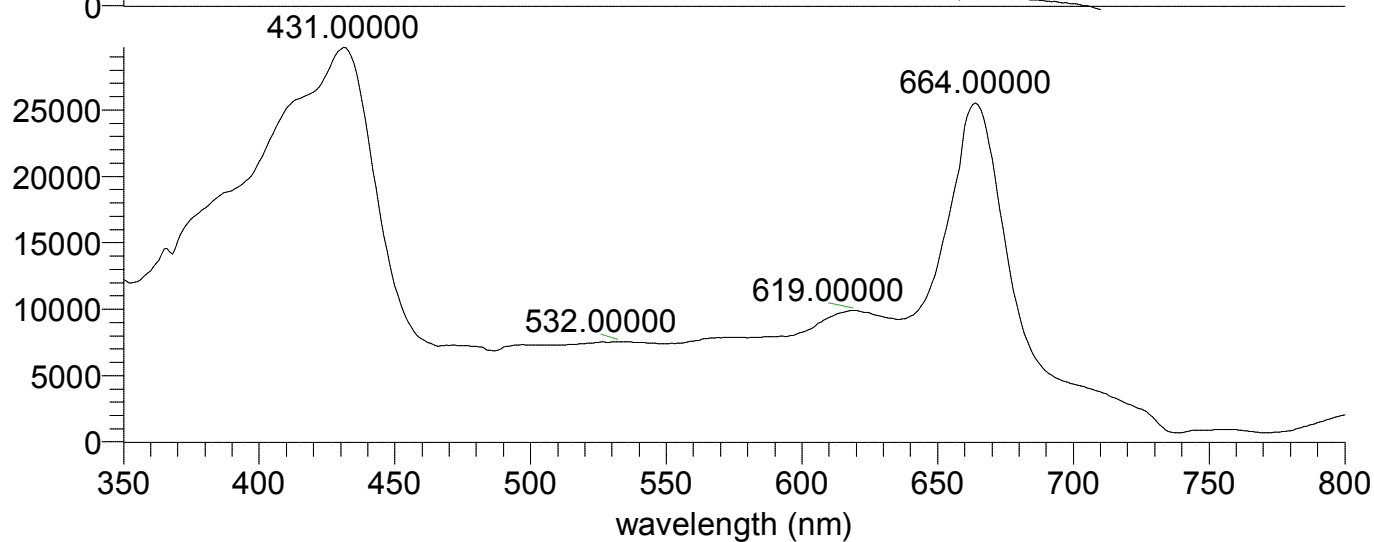

NL:  
2.97E4  
10#10896  
RT: 36.32  
AV: 1

Supplement: Data_Sheet_1.zip [file Muestra10_HPLC-UV.pdf › Carotenoids/Muestra10_HPLC-UV.pdf]

RT: 0.00 - 61.20

NL:  
2.11E5  
Total Scan  
PDA 110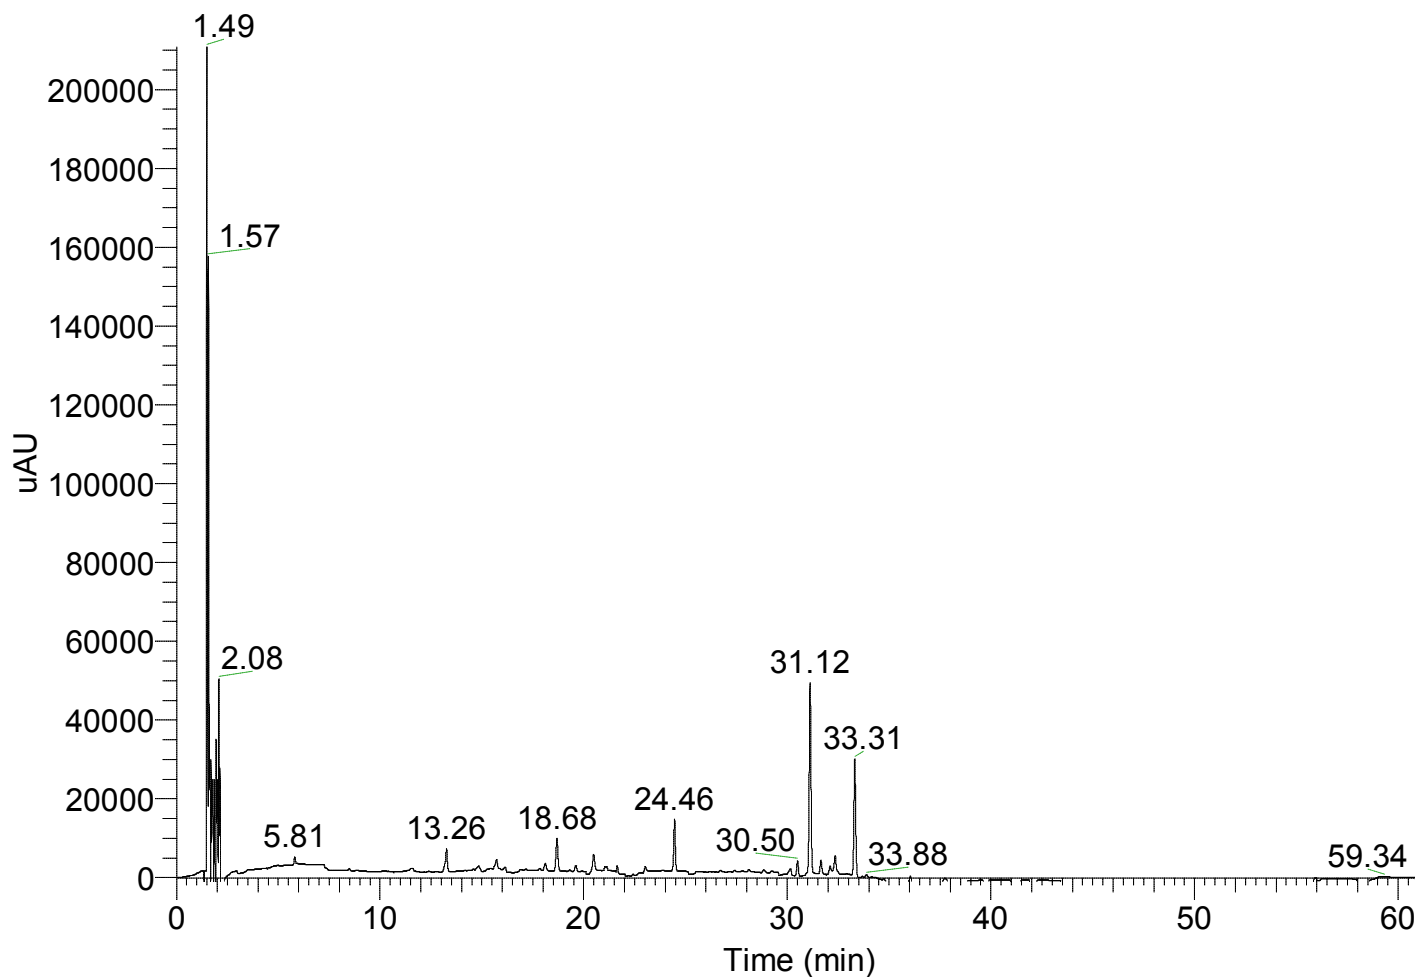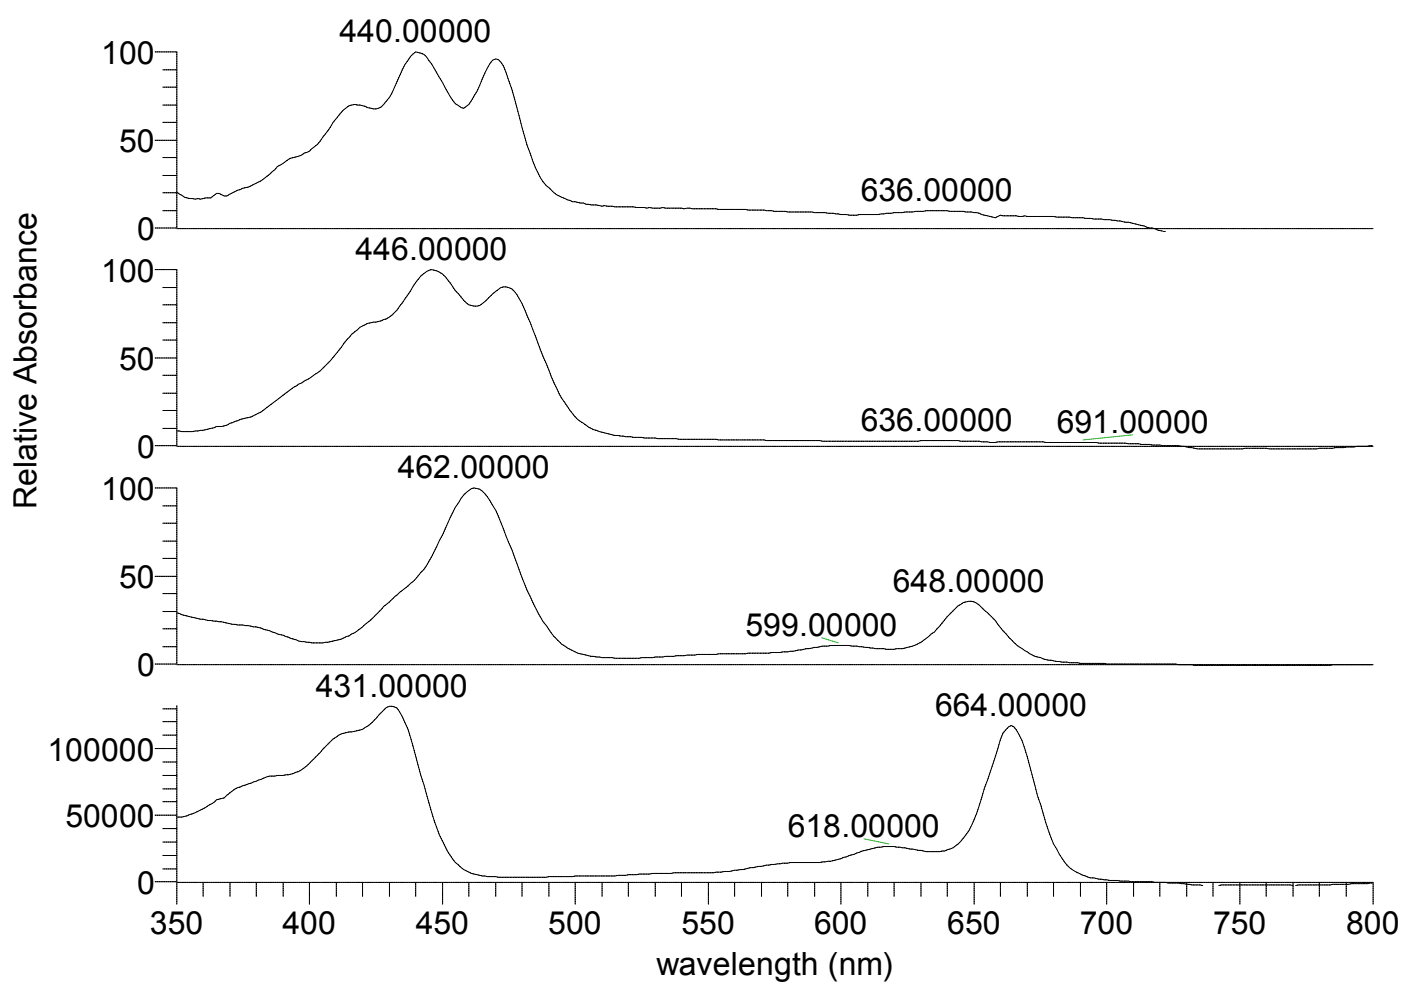

Supplement: Data_Sheet_1.zip [file Muestra110_HPLC-UV.pdf › Carotenoids/Muestra110_HPLC-UV.pdf]

MUESTRA L


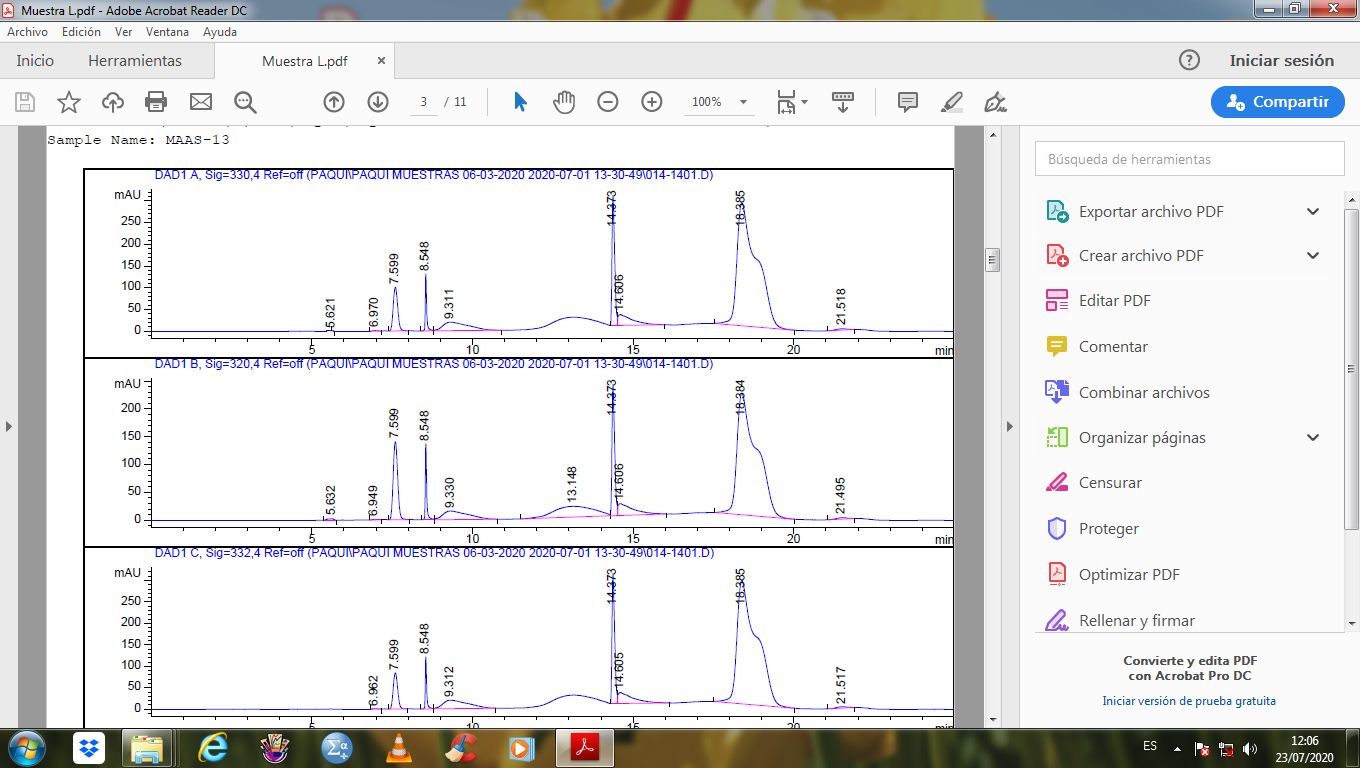


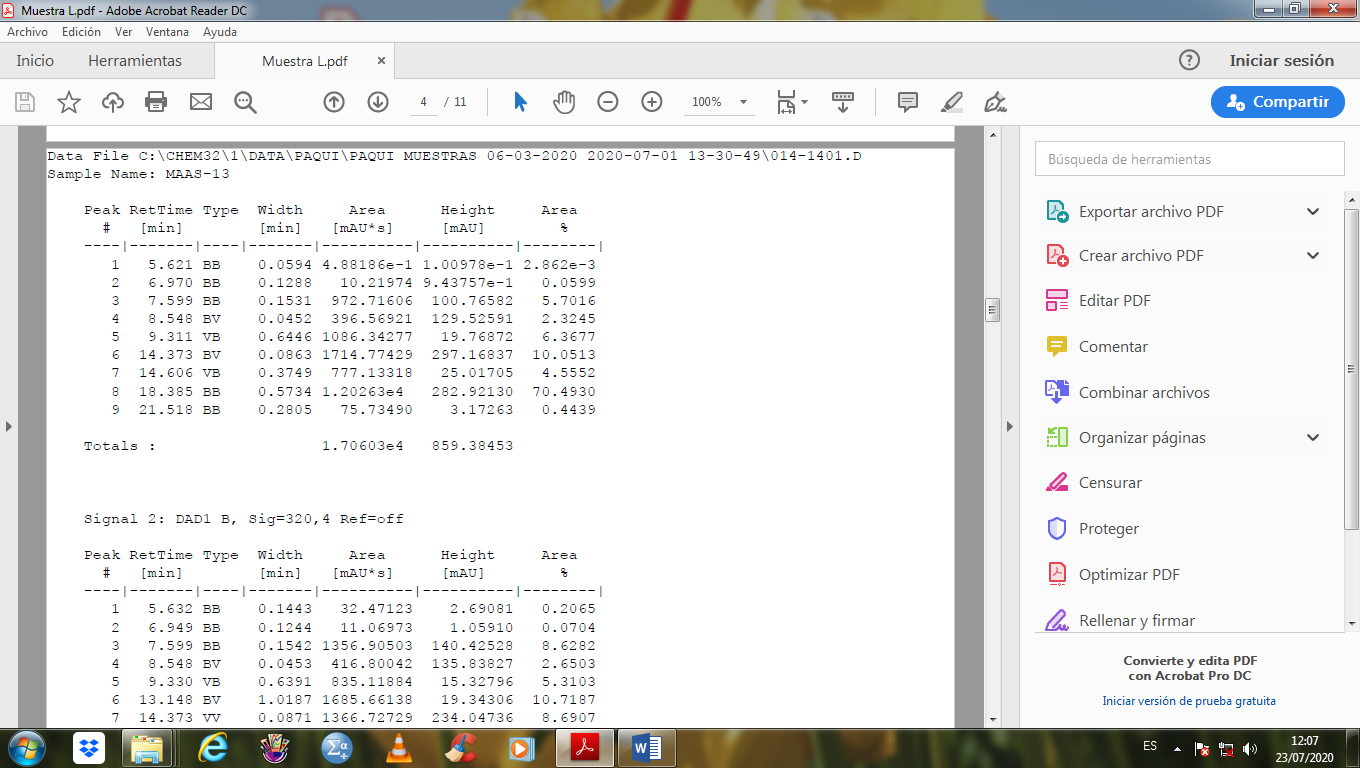

Supplement: Data_Sheet_1.zip [file MUESTRA L.docx]

RT: 0.00 - 61.20

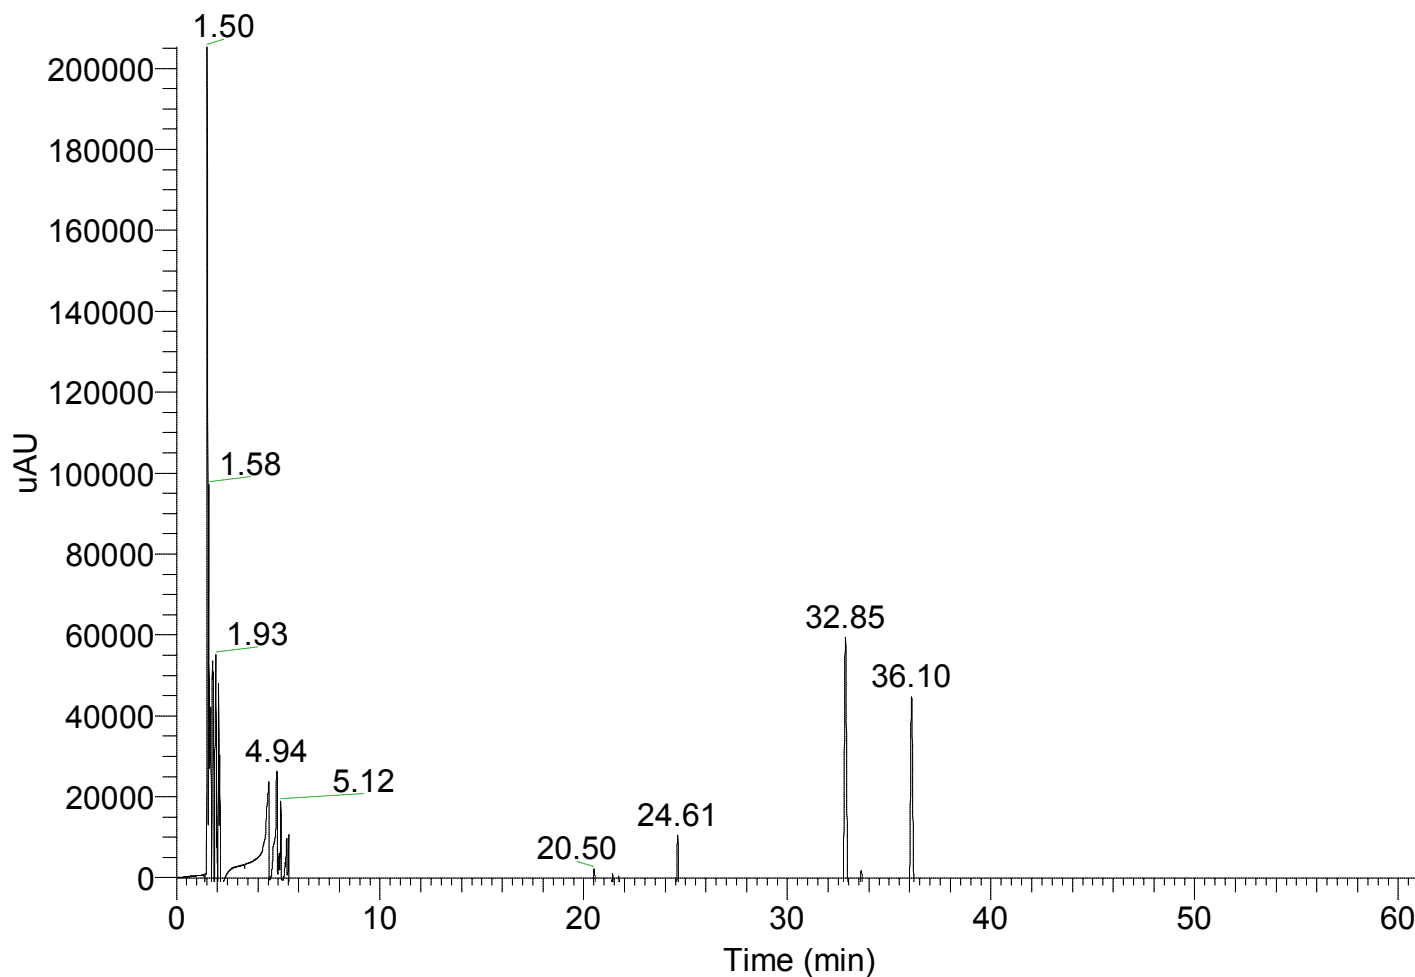

NL:  
2.05E5  
Total Scan  
PDA 111

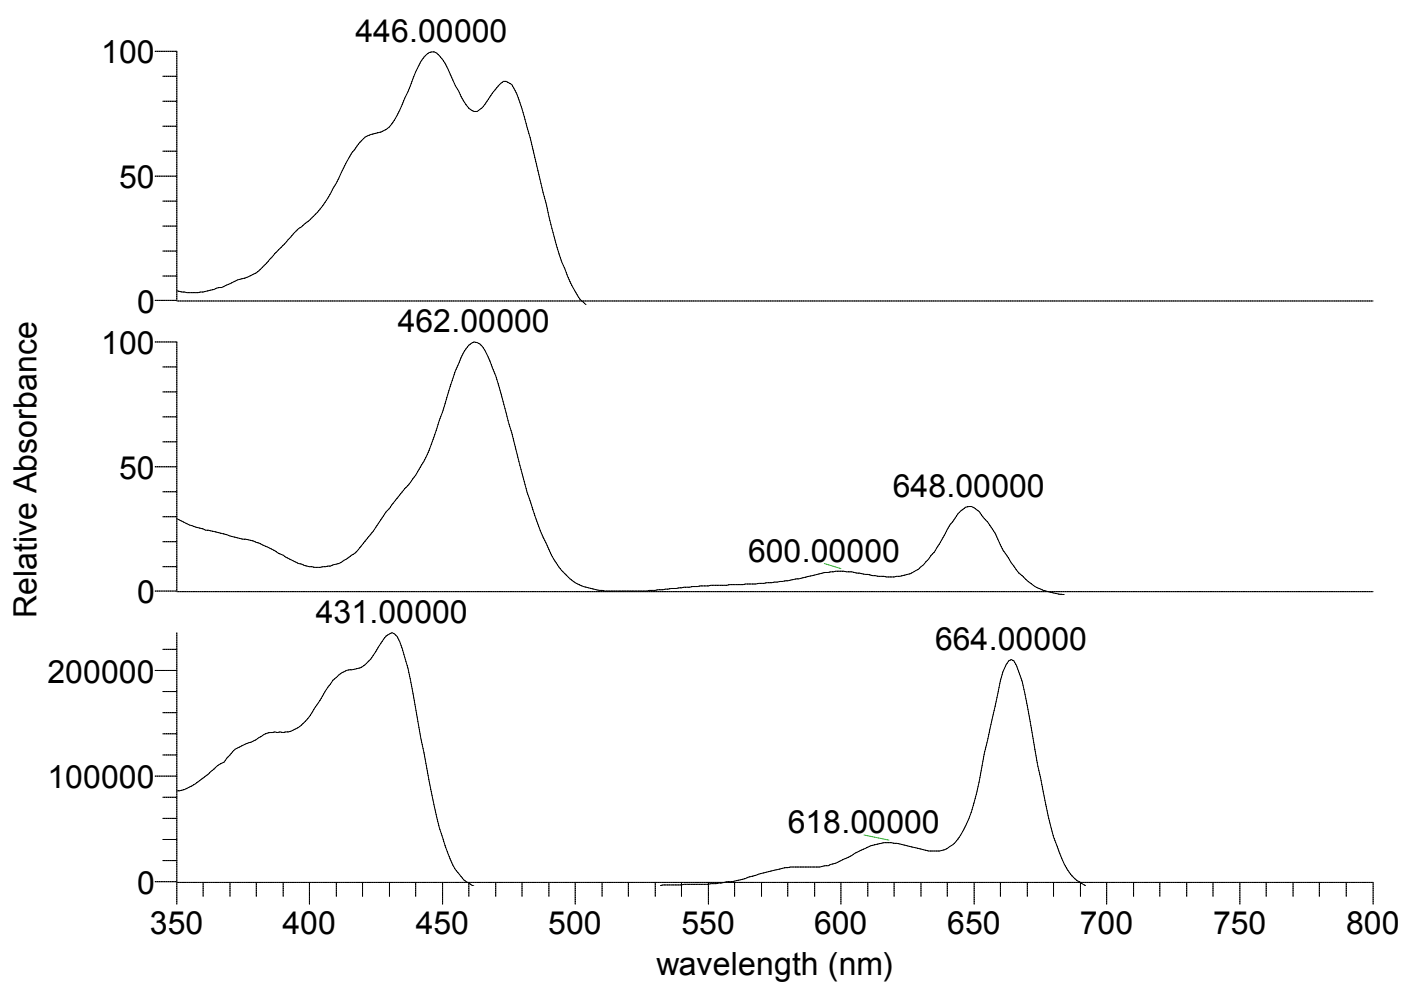

NL:  
1.08E5  
111#7384  
RT: 24.61  
AV: 1

NL:  
4.18E5  
111#9855  
RT: 32.85  
AV: 1

NL:  
2.35E5  
111#10830  
RT: 36.10  
AV: 1

Supplement: Data_Sheet_1.zip [file Muestra111_HPLC-UV.pdf › Carotenoids/Muestra111_HPLC-UV.pdf]

MUESTRA M


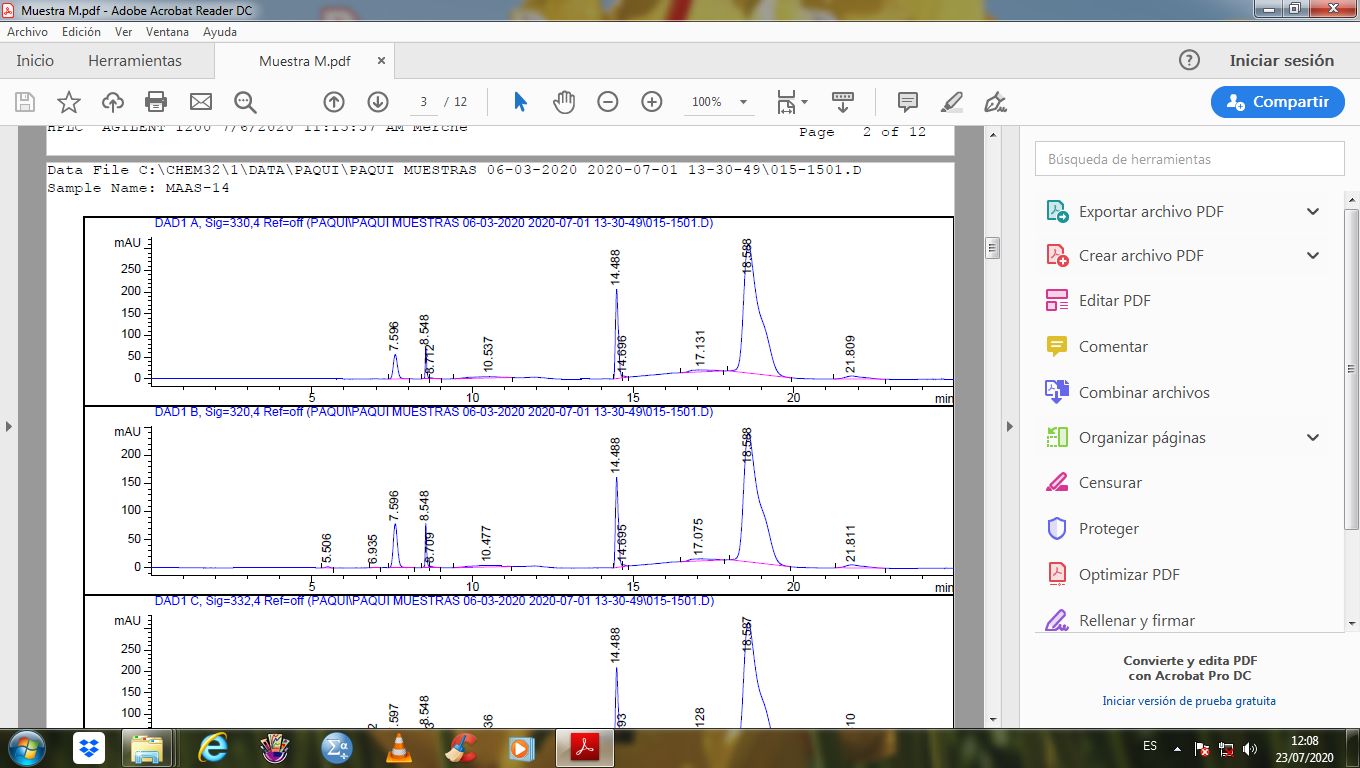


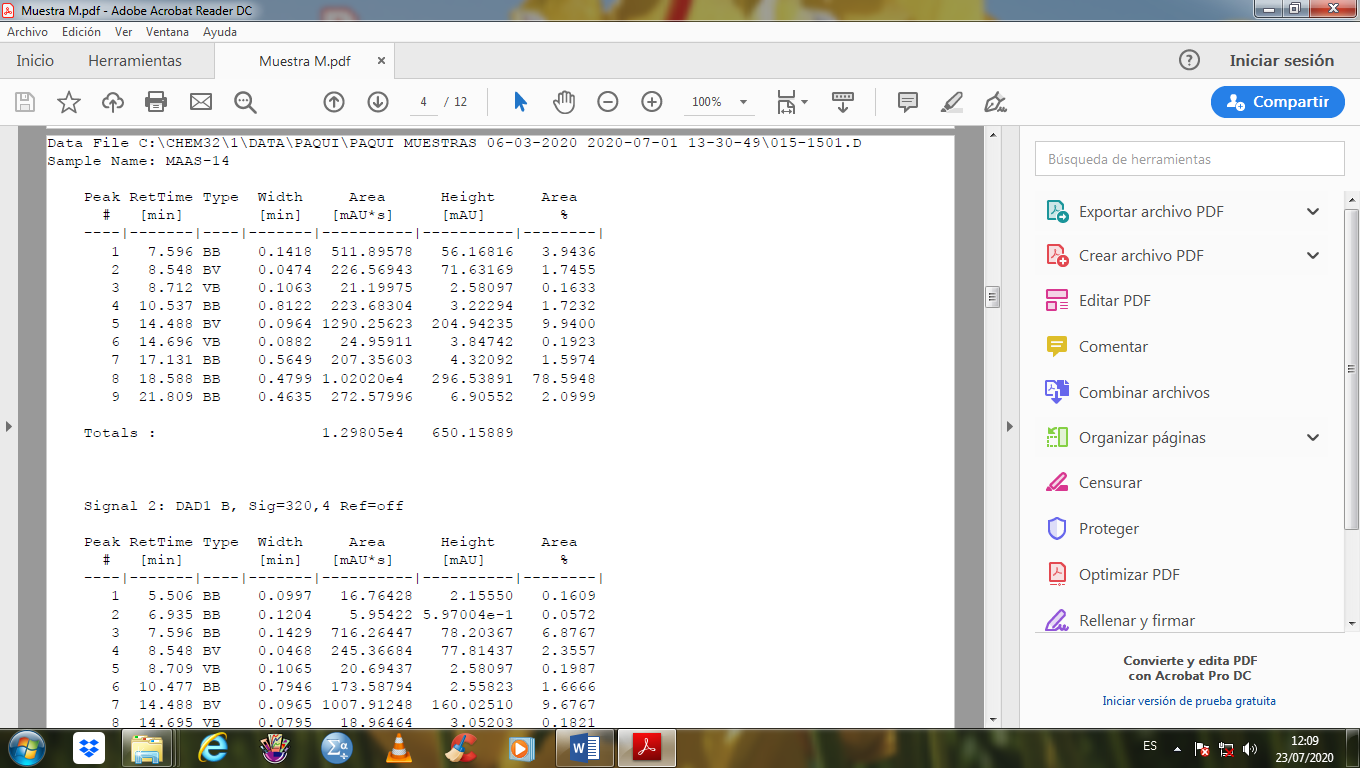

Supplement: Data_Sheet_1.zip [file MUESTRA M.docx]

RT: 0.00 - 61.20

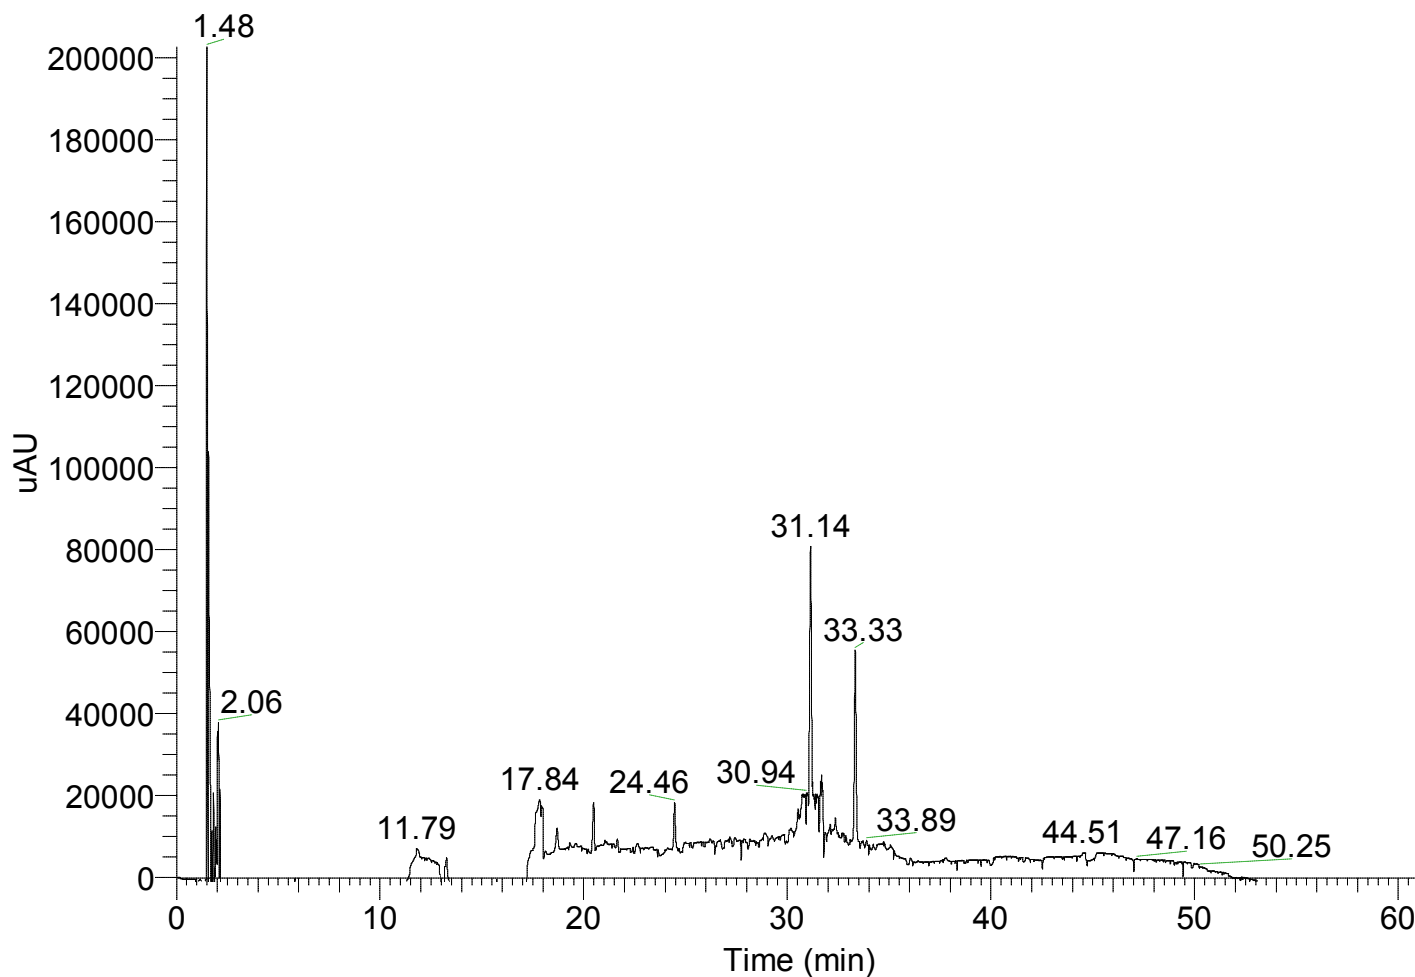

NL:  
2.03E5  
Total Scan  
PDA 115

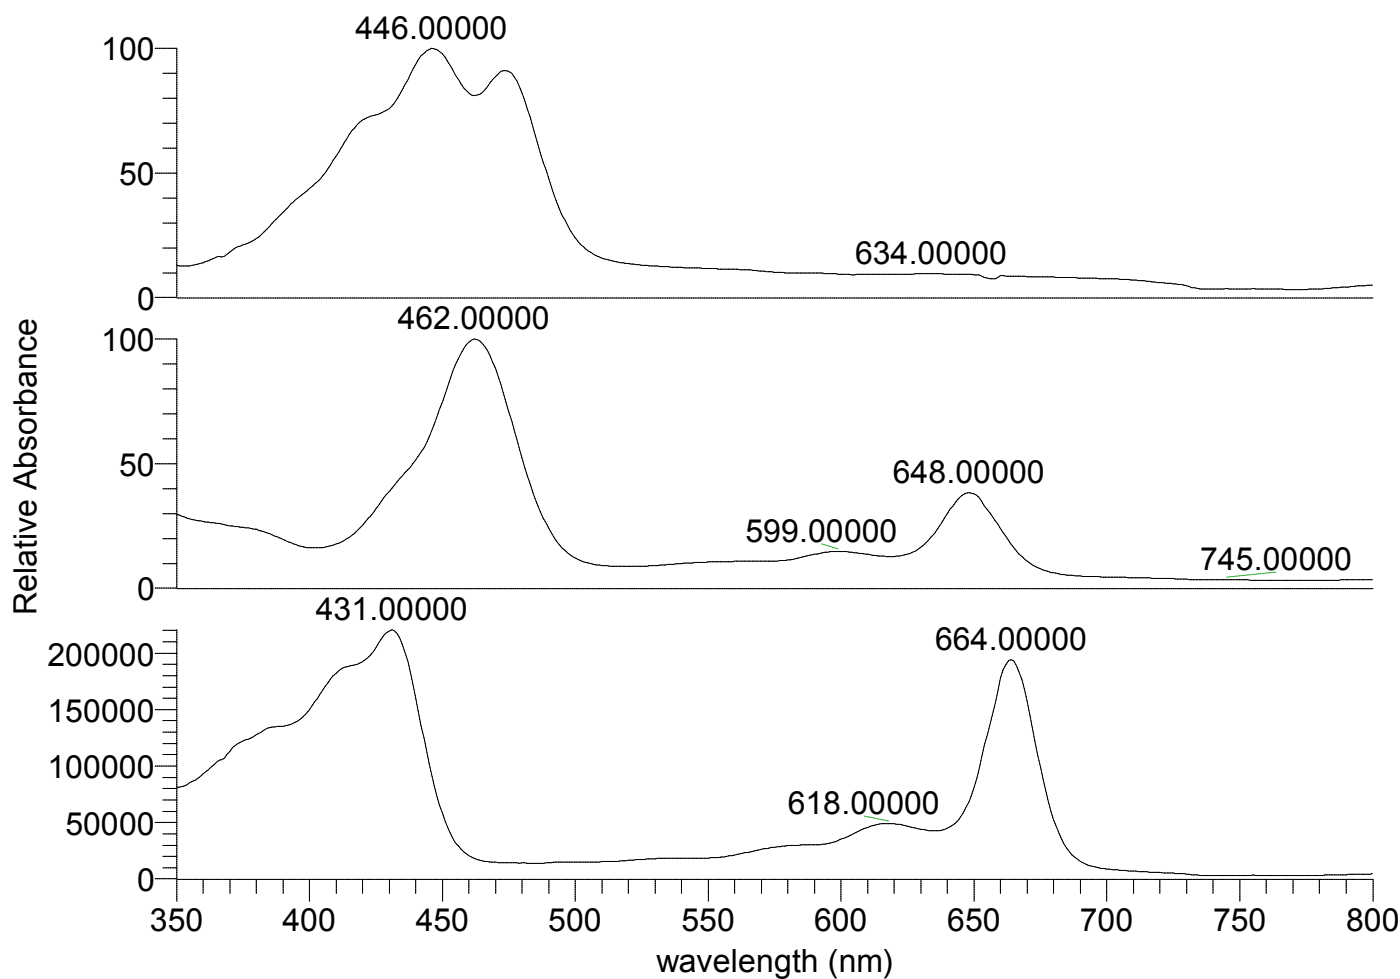

NL:  
7.49E4  
115#14675  
RT: 24.46  
AV: 1

NL:  
3.98E5  
115#18684  
RT: 31.14  
AV: 1

NL:  
2.20E5  
115#19998  
RT: 33.33  
AV: 1

Supplement: Data_Sheet_1.zip [file Muestra115_HPLC-UV.pdf › Carotenoids/Muestra115_HPLC-UV.pdf]

MUESTRA N


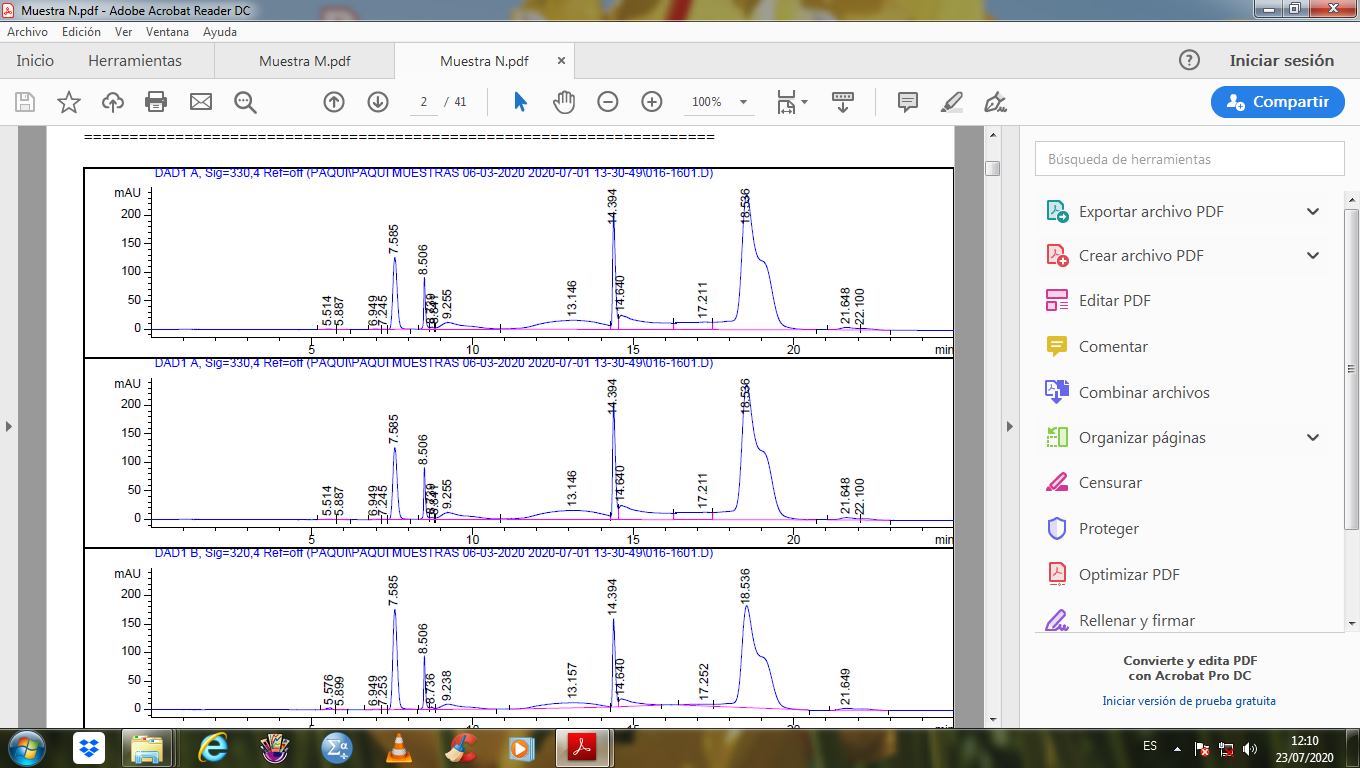


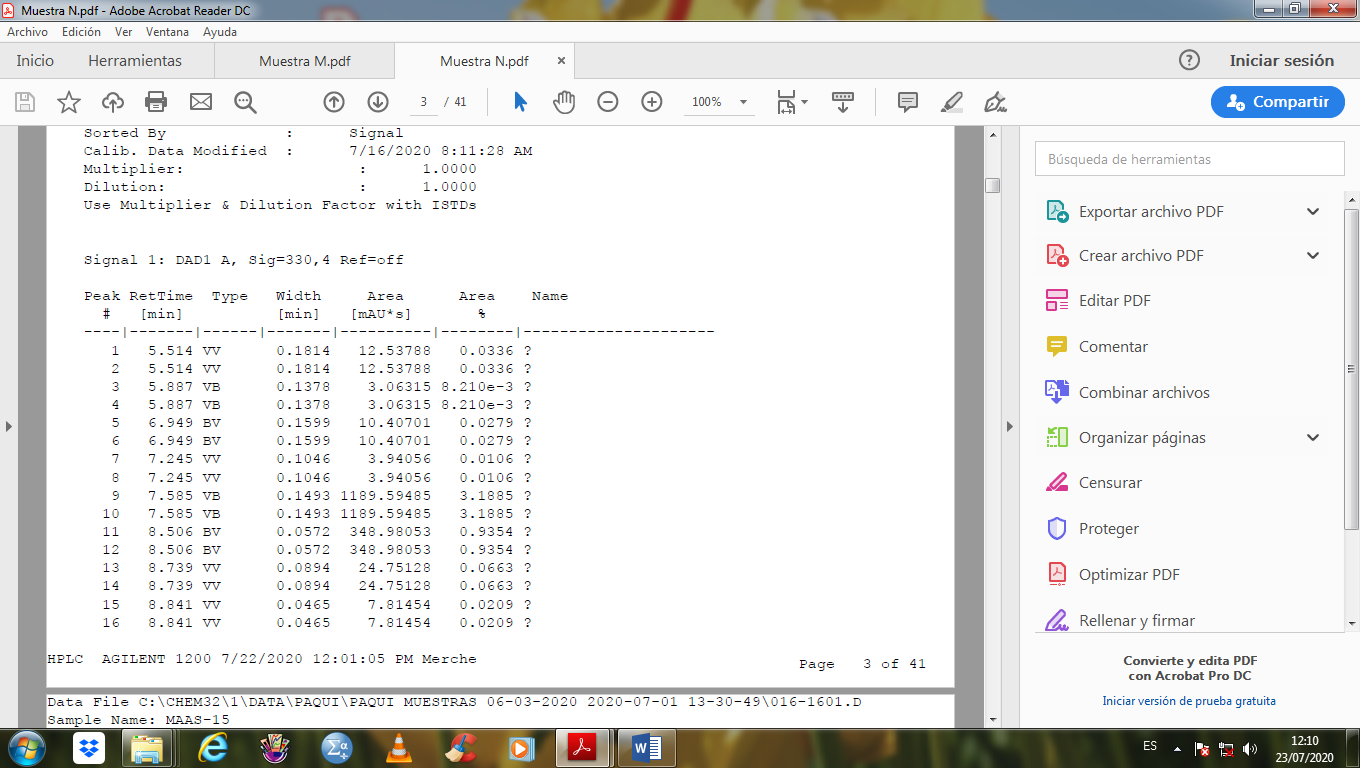


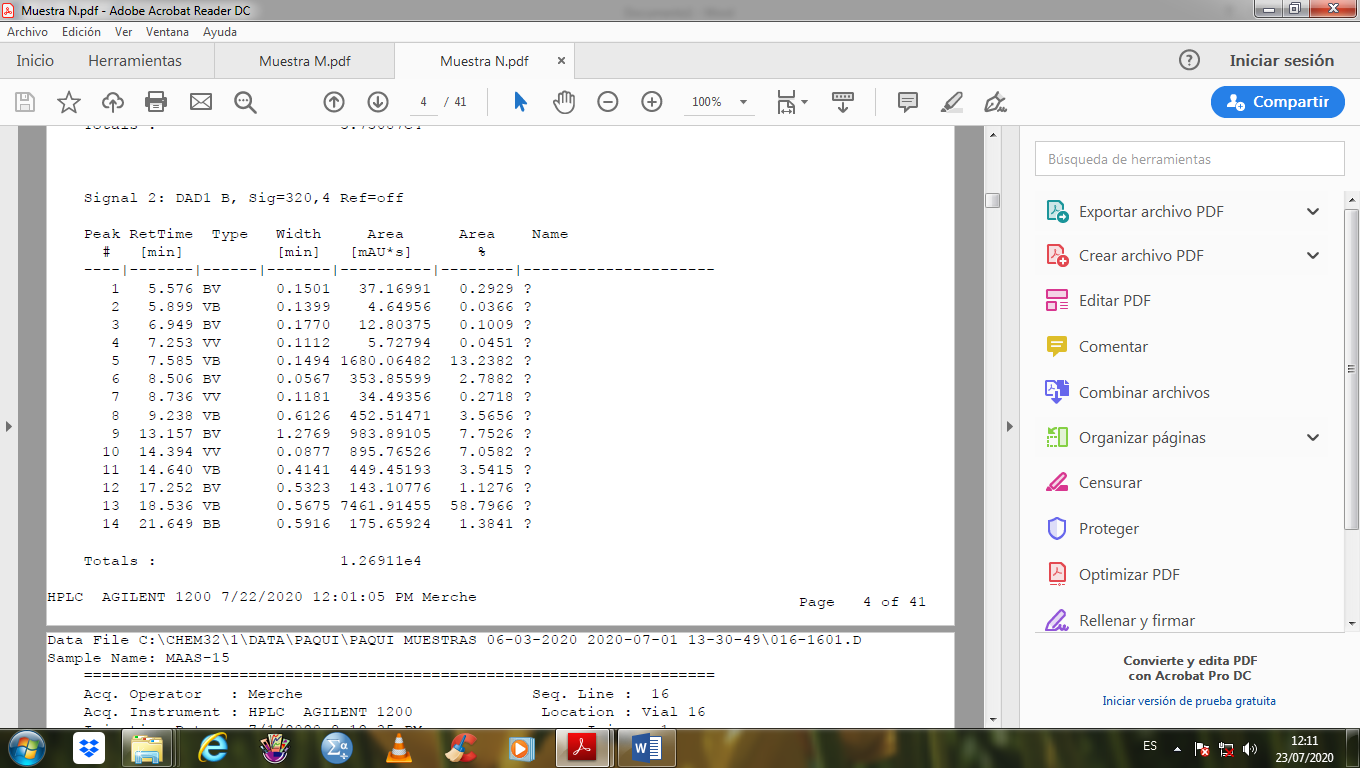

Supplement: Data_Sheet_1.zip [file MUESTRA N.docx]

RT: 0.00 - 61.20

NL:  
2.09E5  
Total Scan  
PDA 116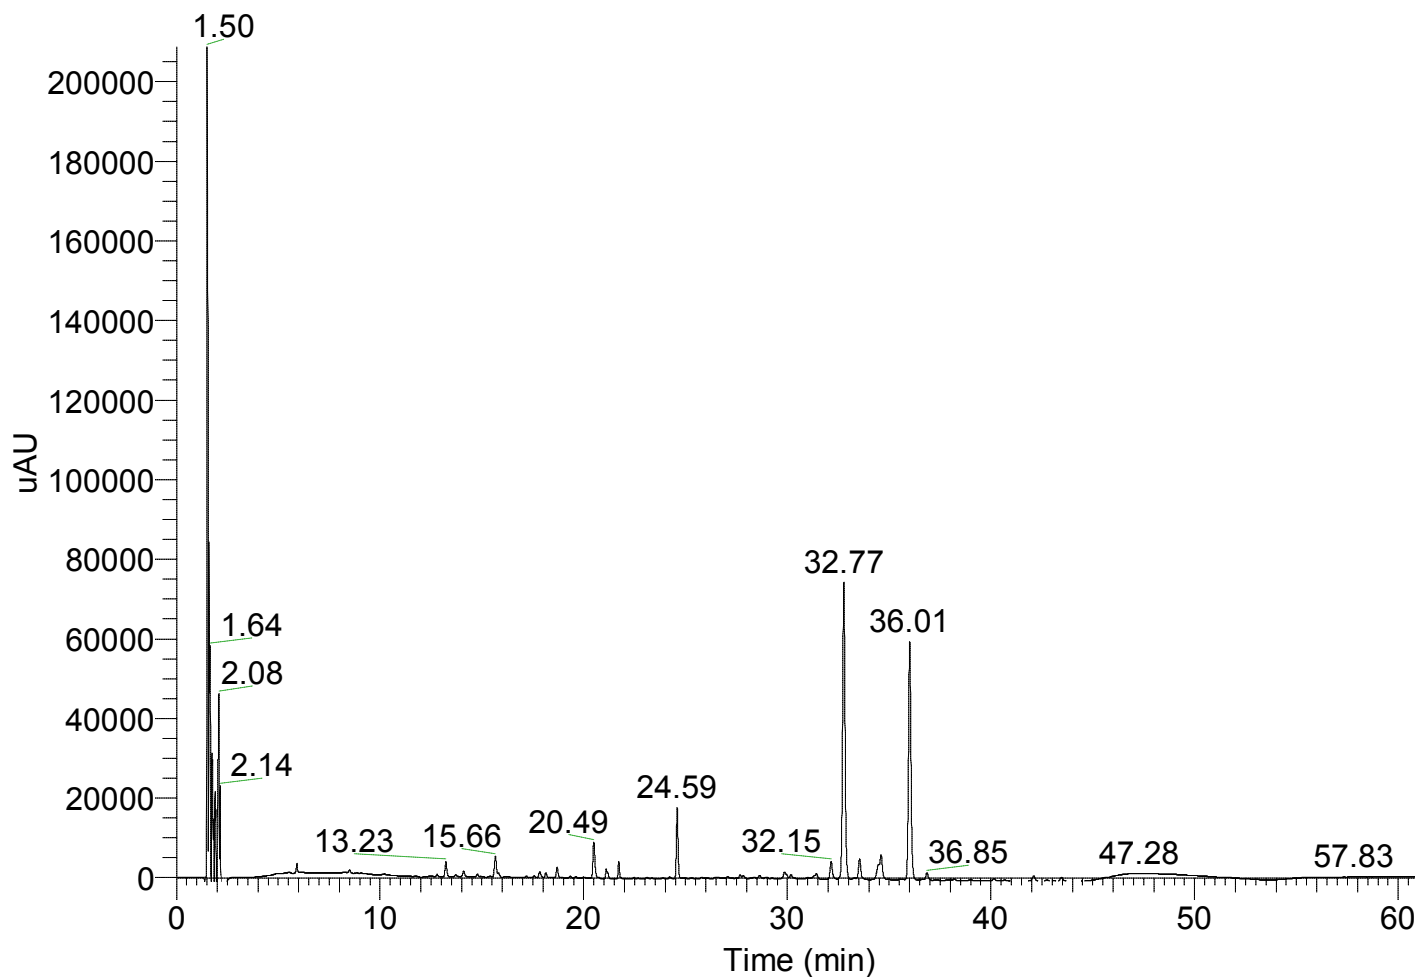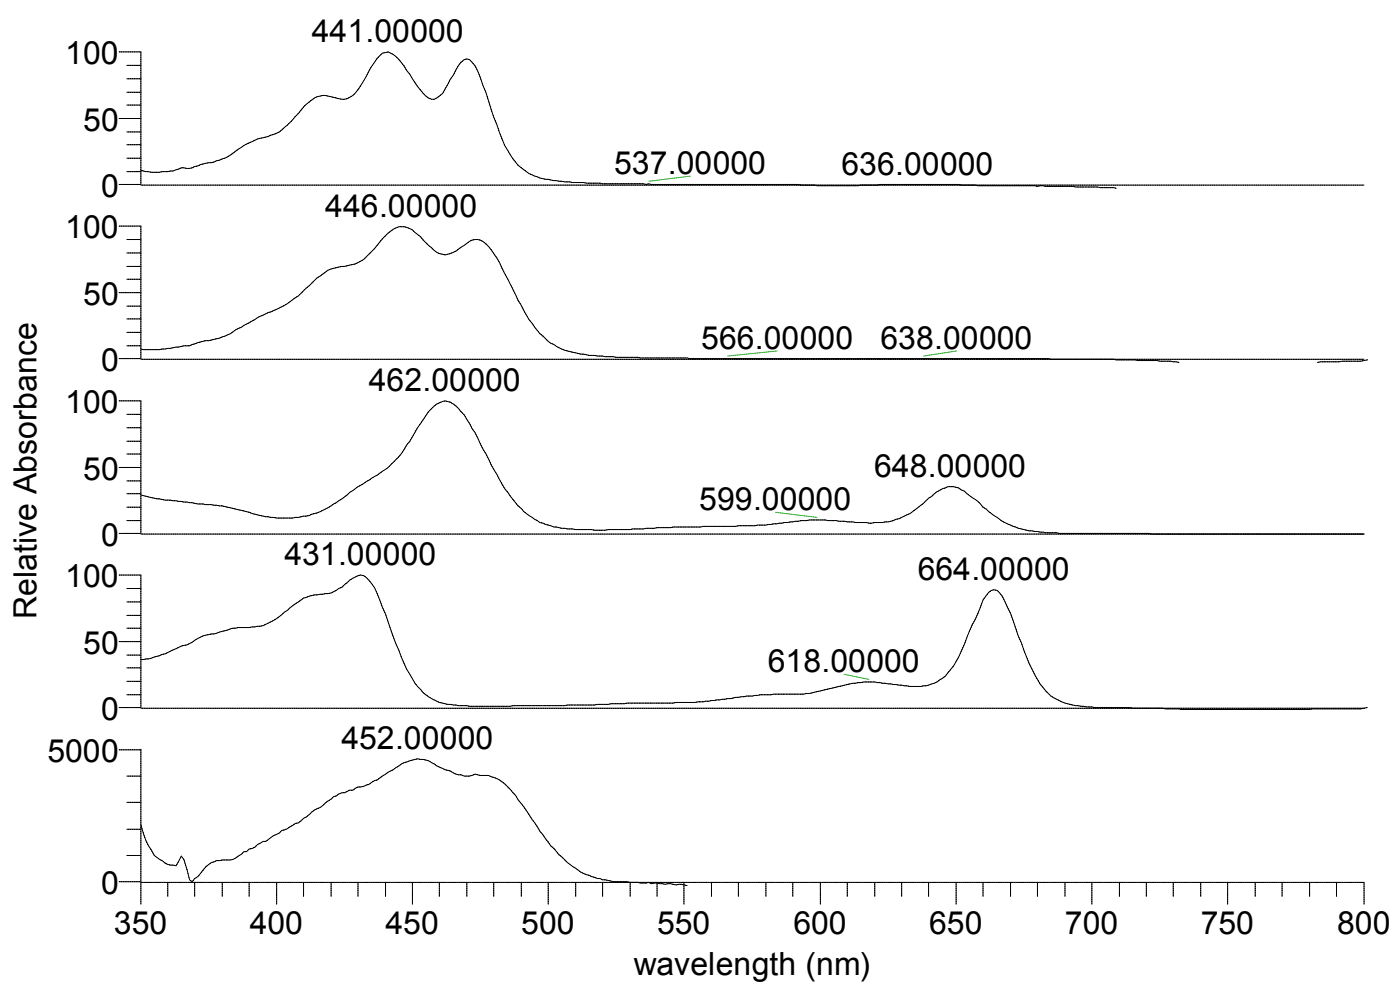

NL:  
2.90E4  
116#6515  
RT: 21.72  
AV: 1  
NL:  
1.03E5  
116#7376  
RT: 24.59  
AV: 1  
NL:  
4.58E5  
116#9831  
RT: 32.77  
AV: 1  
NL:  
2.65E5  
116#10803  
RT: 36.01  
AV: 1  
NL:  
5.00E3  
116#13046  
RT: 43.49  
AV: 1

Supplement: Data_Sheet_1.zip [file Muestra116_HPLC-UV-Vis.pdf › Carotenoids/Muestra116_HPLC-UV-Vis.pdf]

MUESTRA O


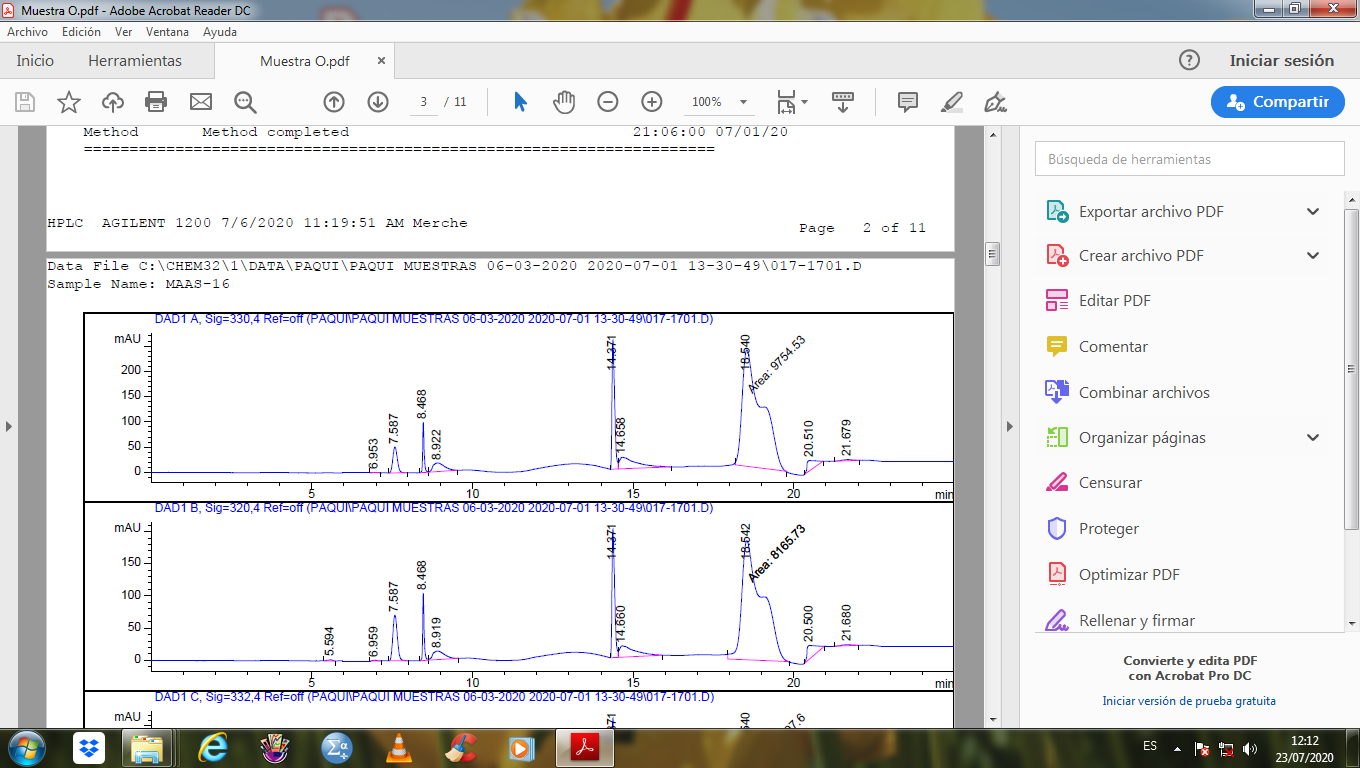


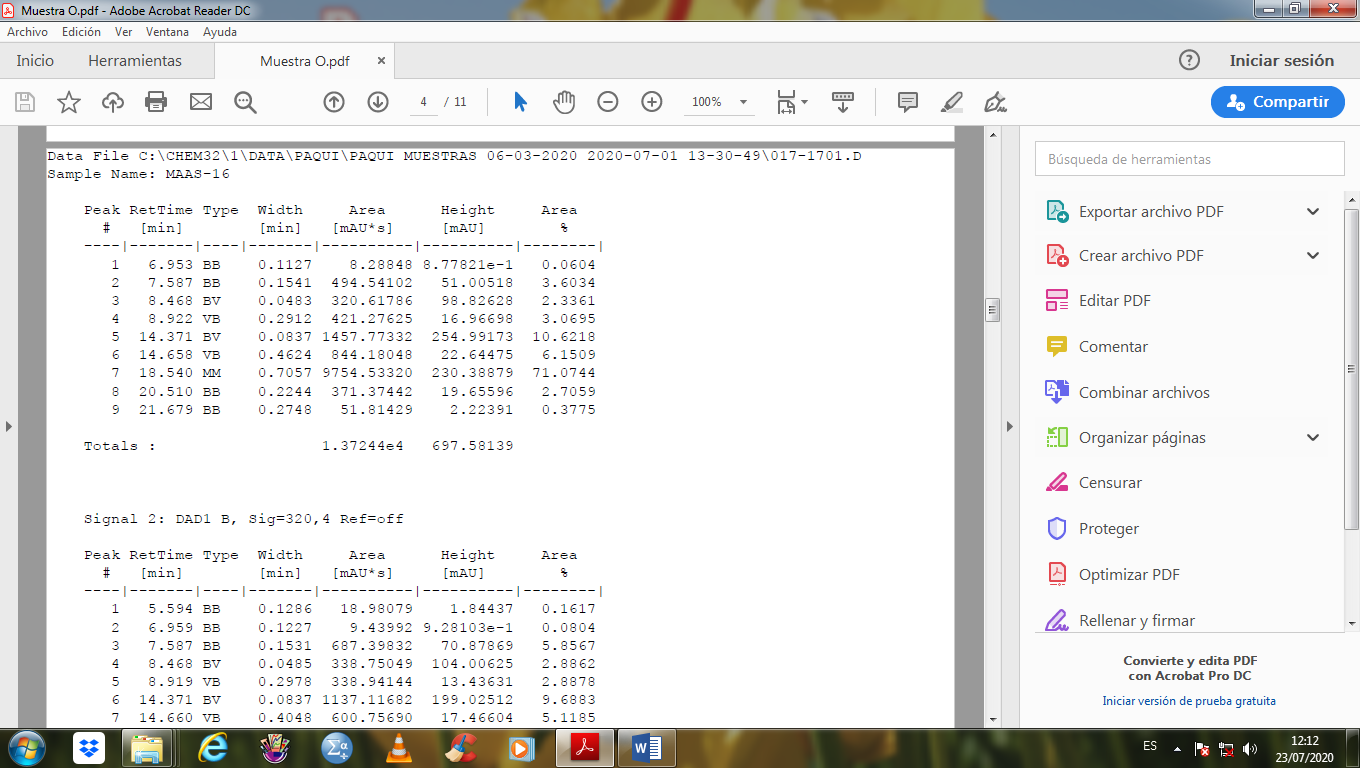

Supplement: Data_Sheet_1.zip [file MUESTRA O.docx]

RT: 0.00 - 61.20

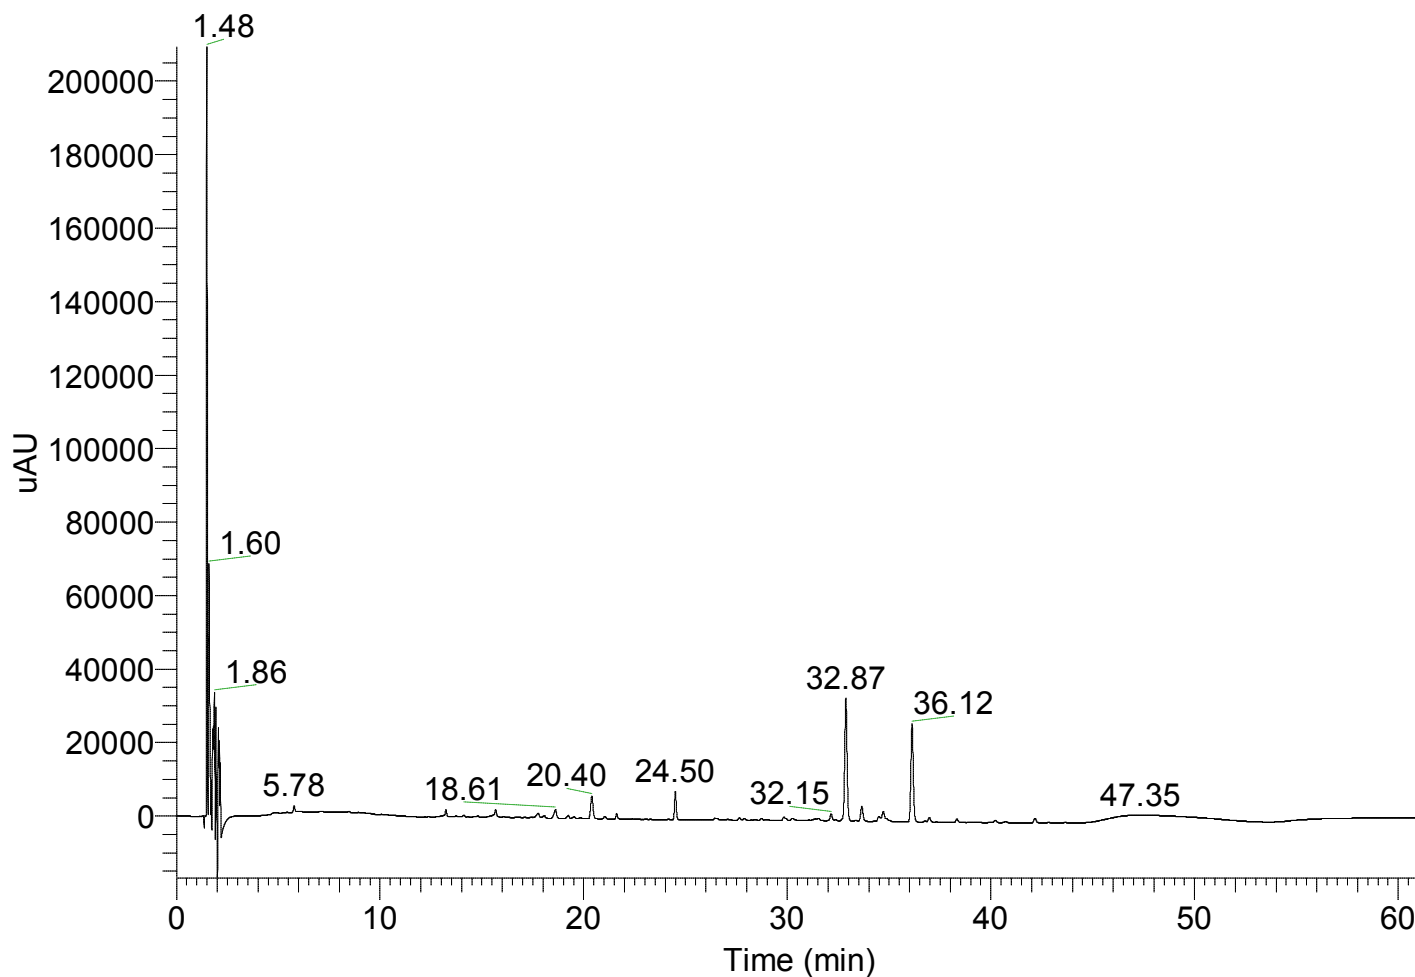

NL:  
2.09E5  
Total Scan  
PDA 117

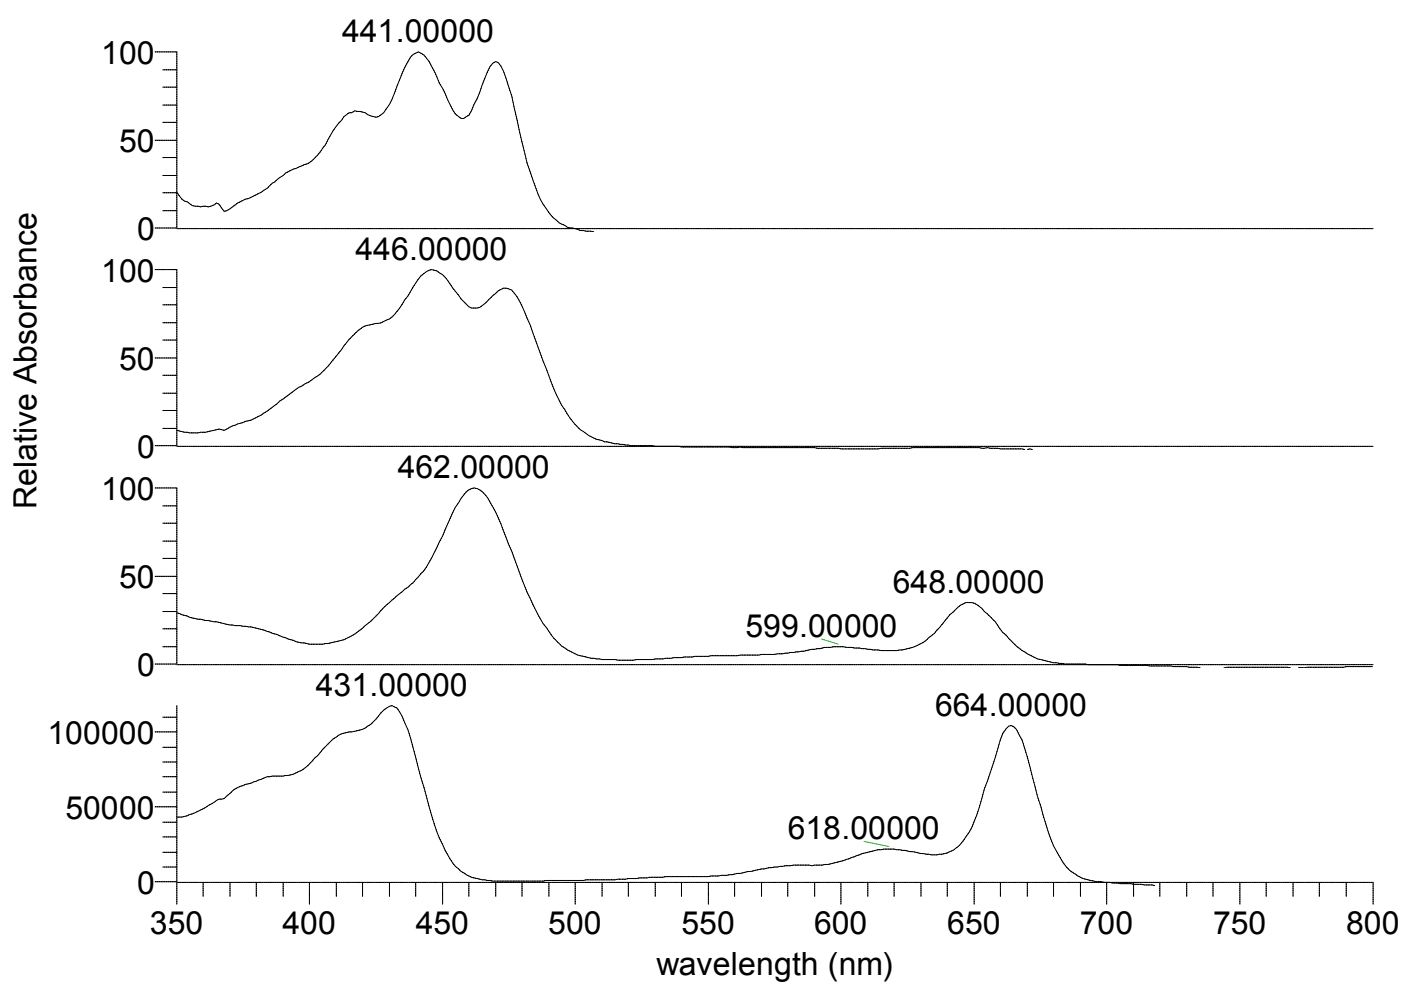

NL:  
9.32E3  
117#6487  
RT: 21.62  
AV: 1

NL:  
4.35E4  
117#7350  
RT: 24.50  
AV: 1

NL:  
2.04E5  
117#9860  
RT: 32.87  
AV: 1

NL:  
1.17E5  
117#10836  
RT: 36.12  
AV: 1

Supplement: Data_Sheet_1.zip [file Muestra117_HPLC-UV.pdf › Carotenoids/Muestra117_HPLC-UV.pdf]

Muestra F


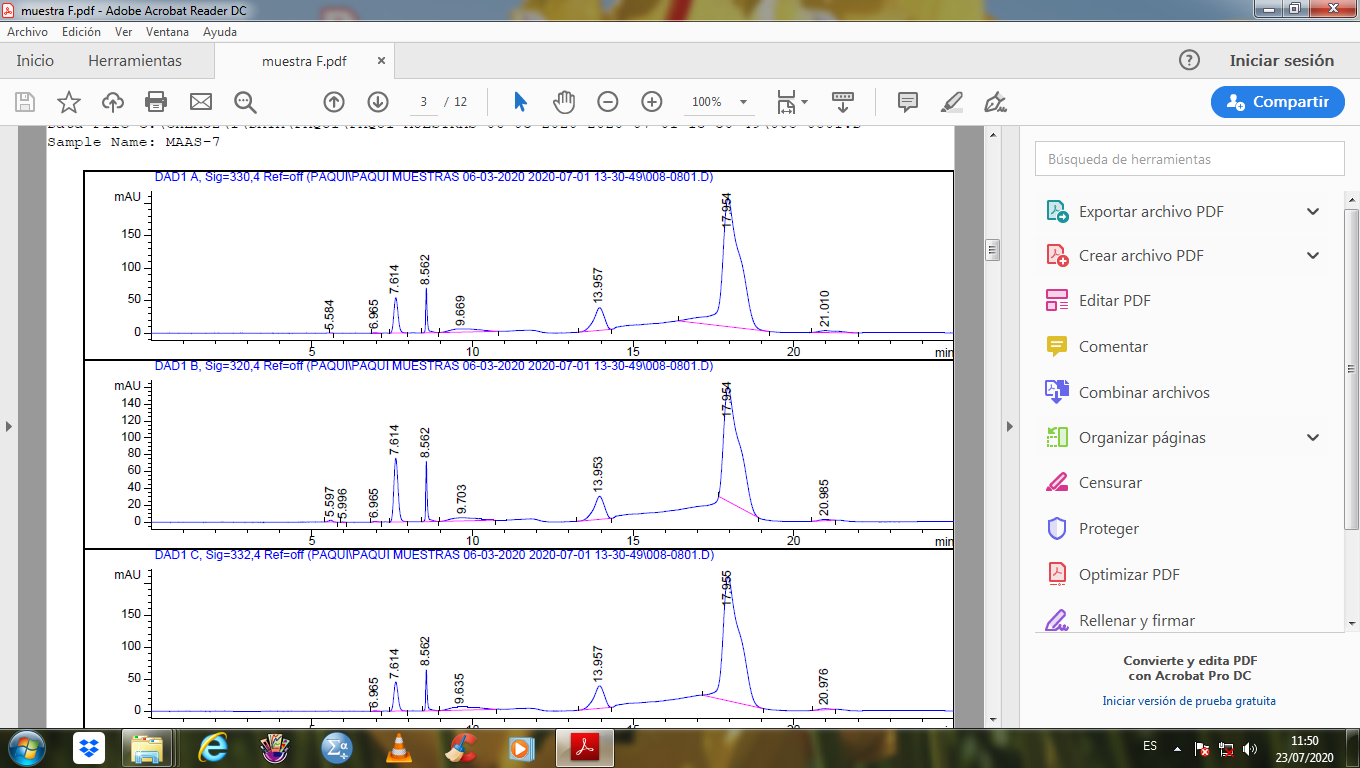


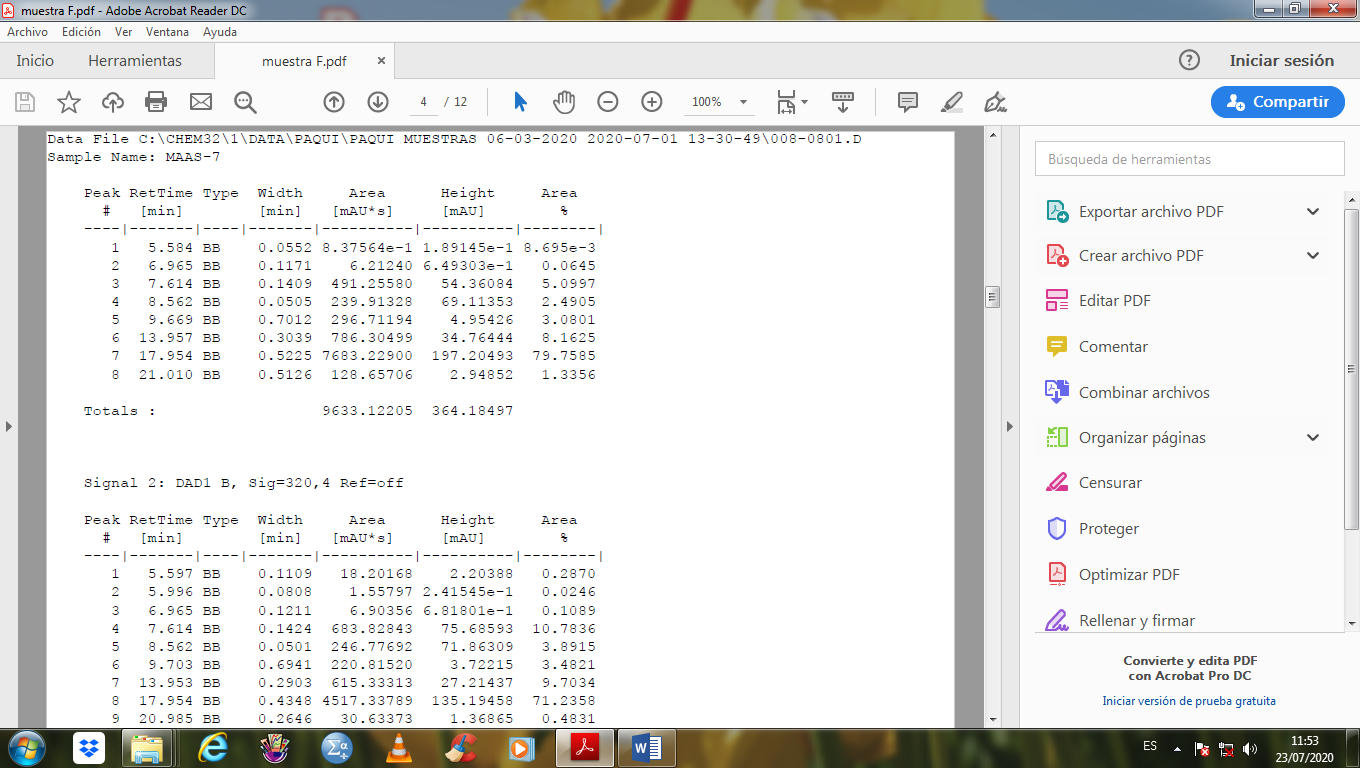

Supplement: Data_Sheet_1.zip [file Muestra F.docx]

RT: 0.00 - 61.20

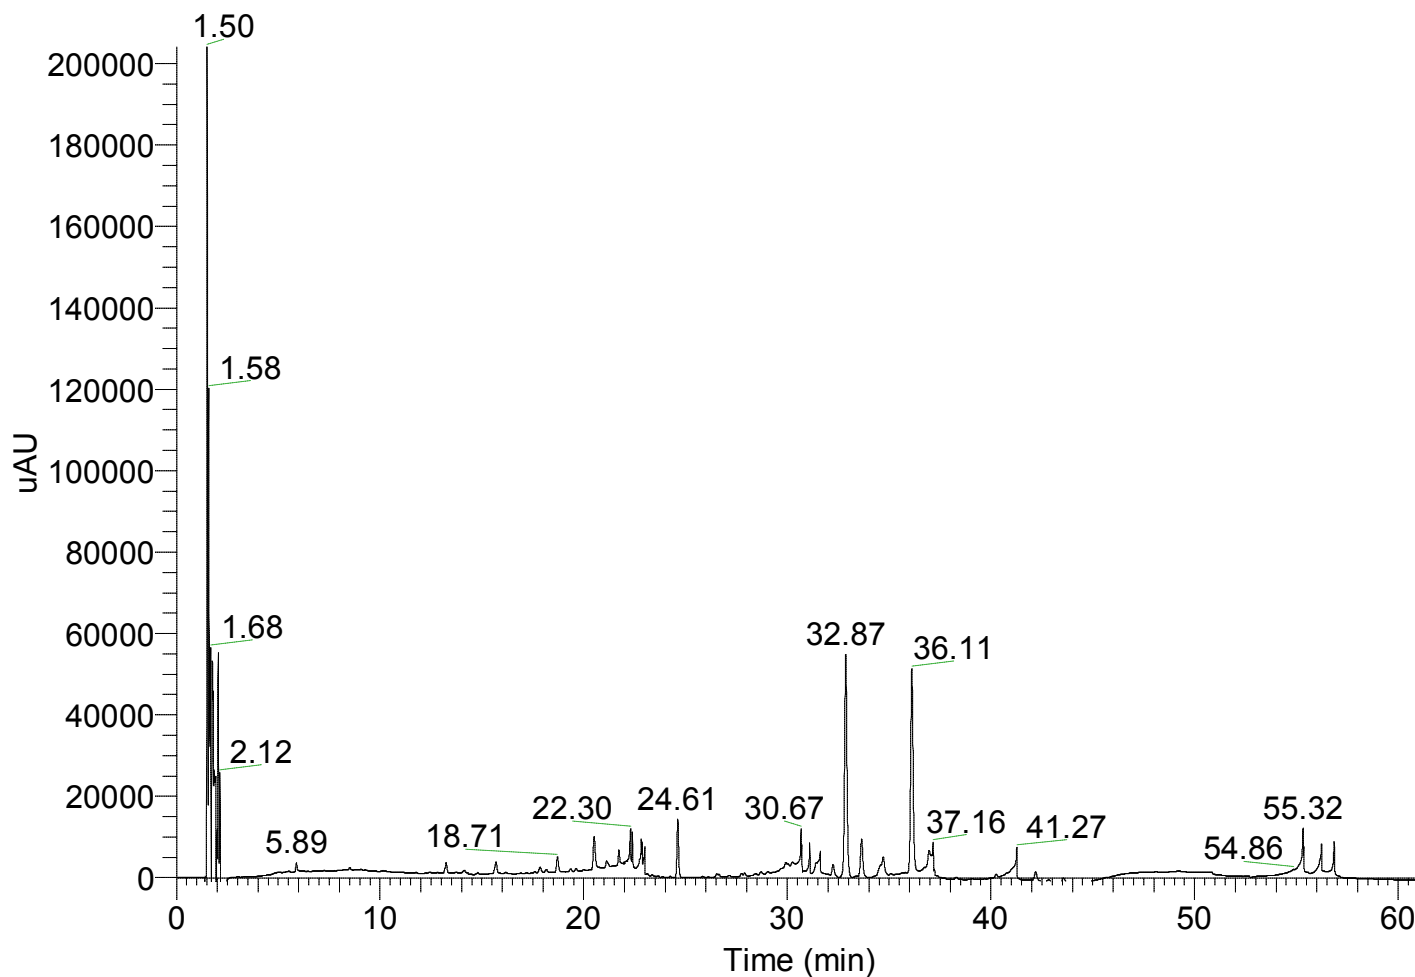

NL:  
2.04E5  
Total Scan  
PDA 119

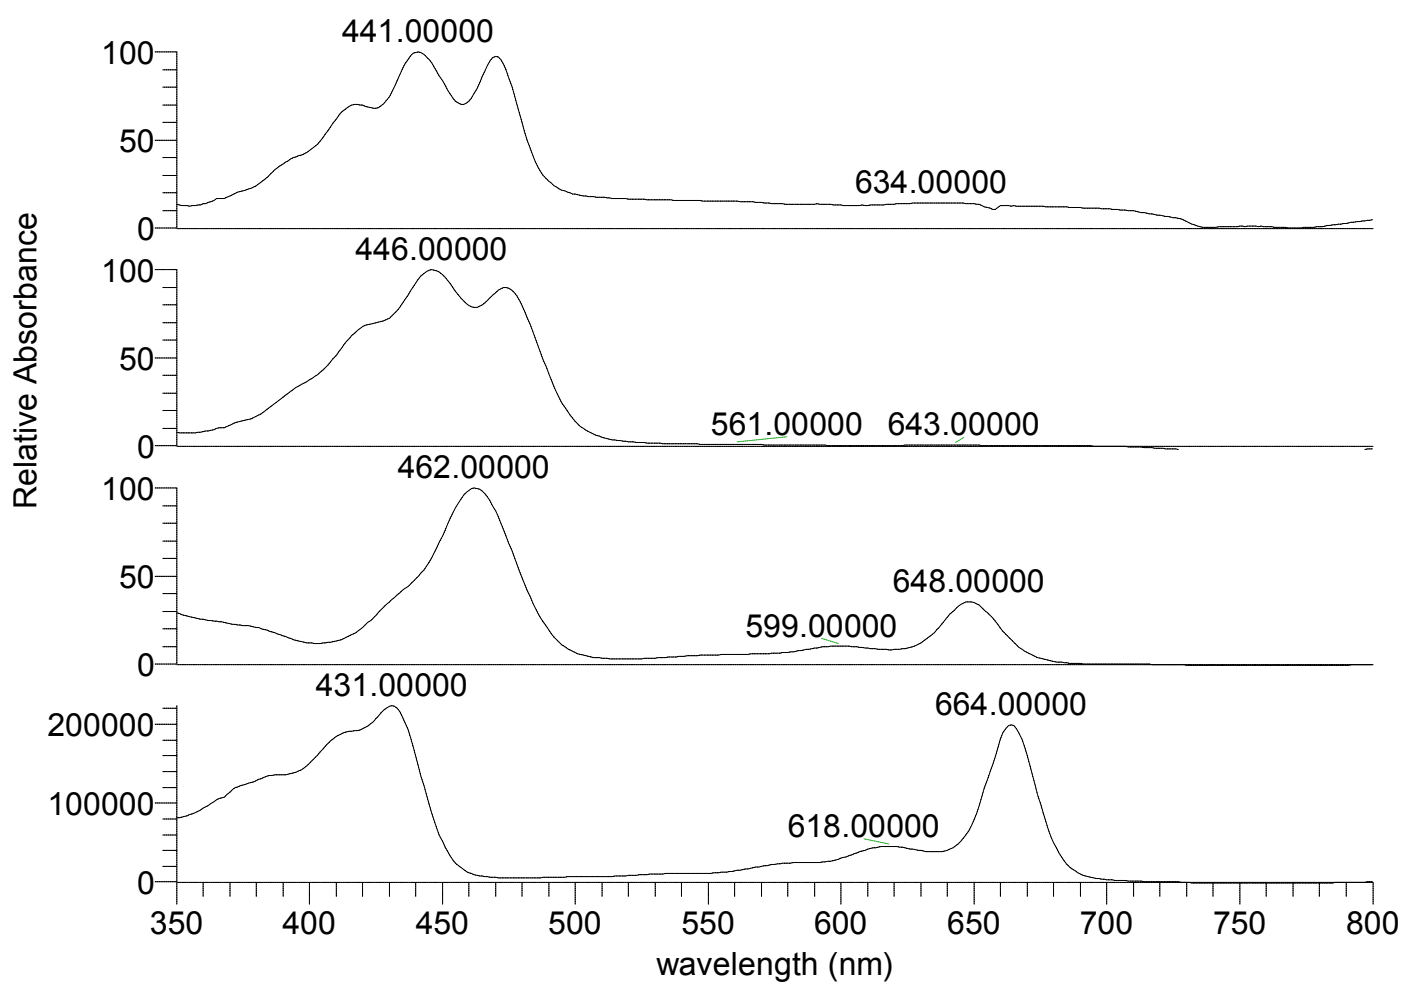

NL:  
2.76E4  
119#6518  
RT: 21.73  
AV: 1

NL:  
8.25E4  
119#7383  
RT: 24.61  
AV: 1

NL:  
3.34E5  
119#9861  
RT: 32.87  
AV: 1

NL:  
2.23E5  
119#10834  
RT: 36.11  
AV: 1

Supplement: Data_Sheet_1.zip [file Muestra119_HPLC-UV.pdf › Carotenoids/Muestra119_HPLC-UV.pdf]

RT: 0.00 - 61.20

NL:  
2.13E5  
Total Scan  
PDA 11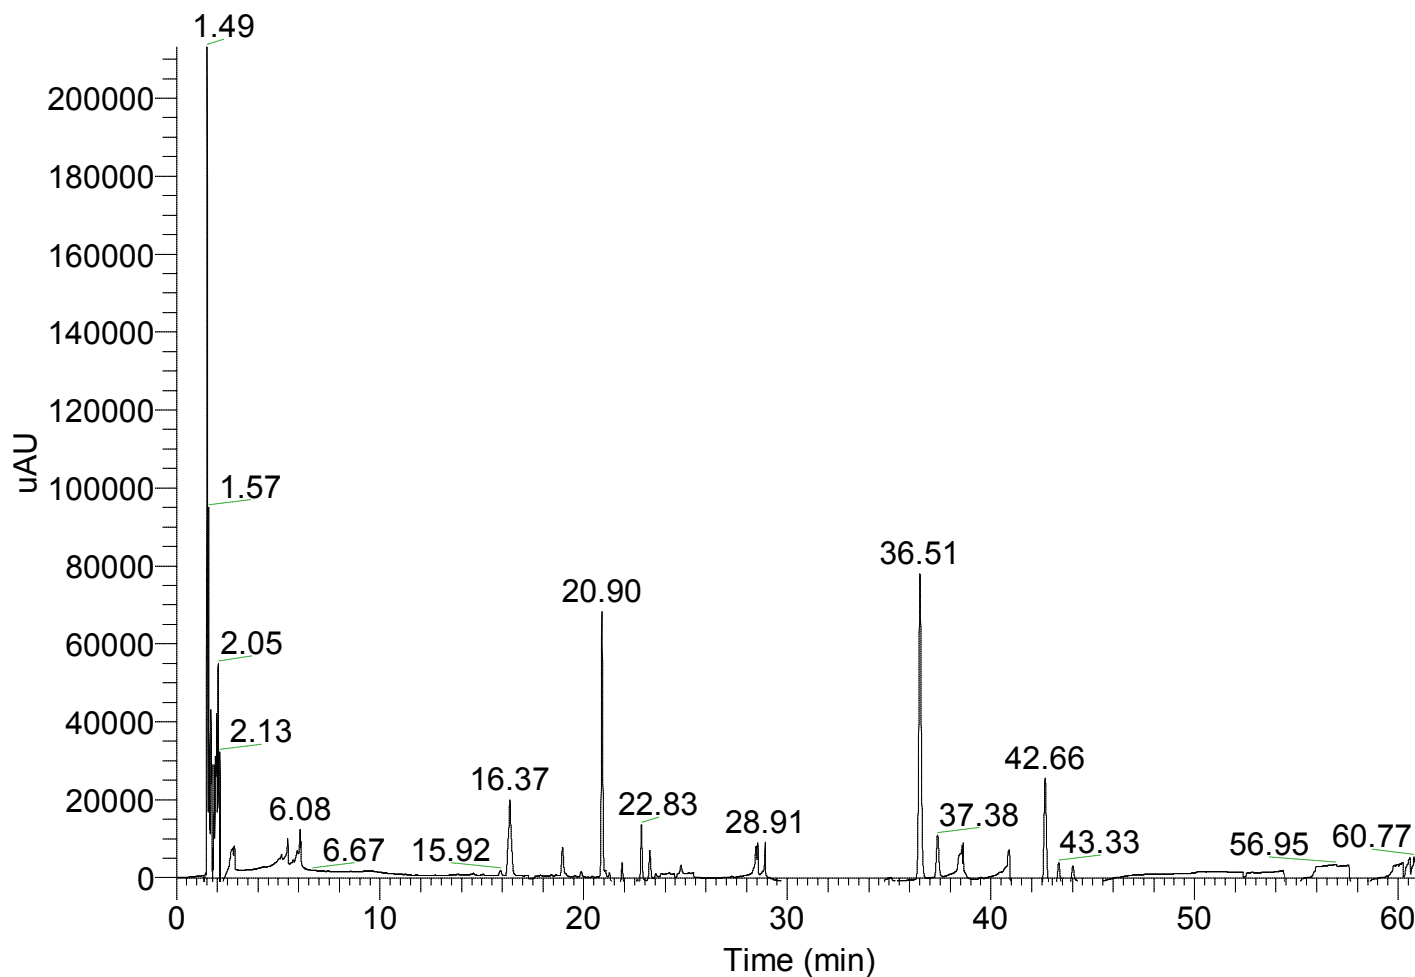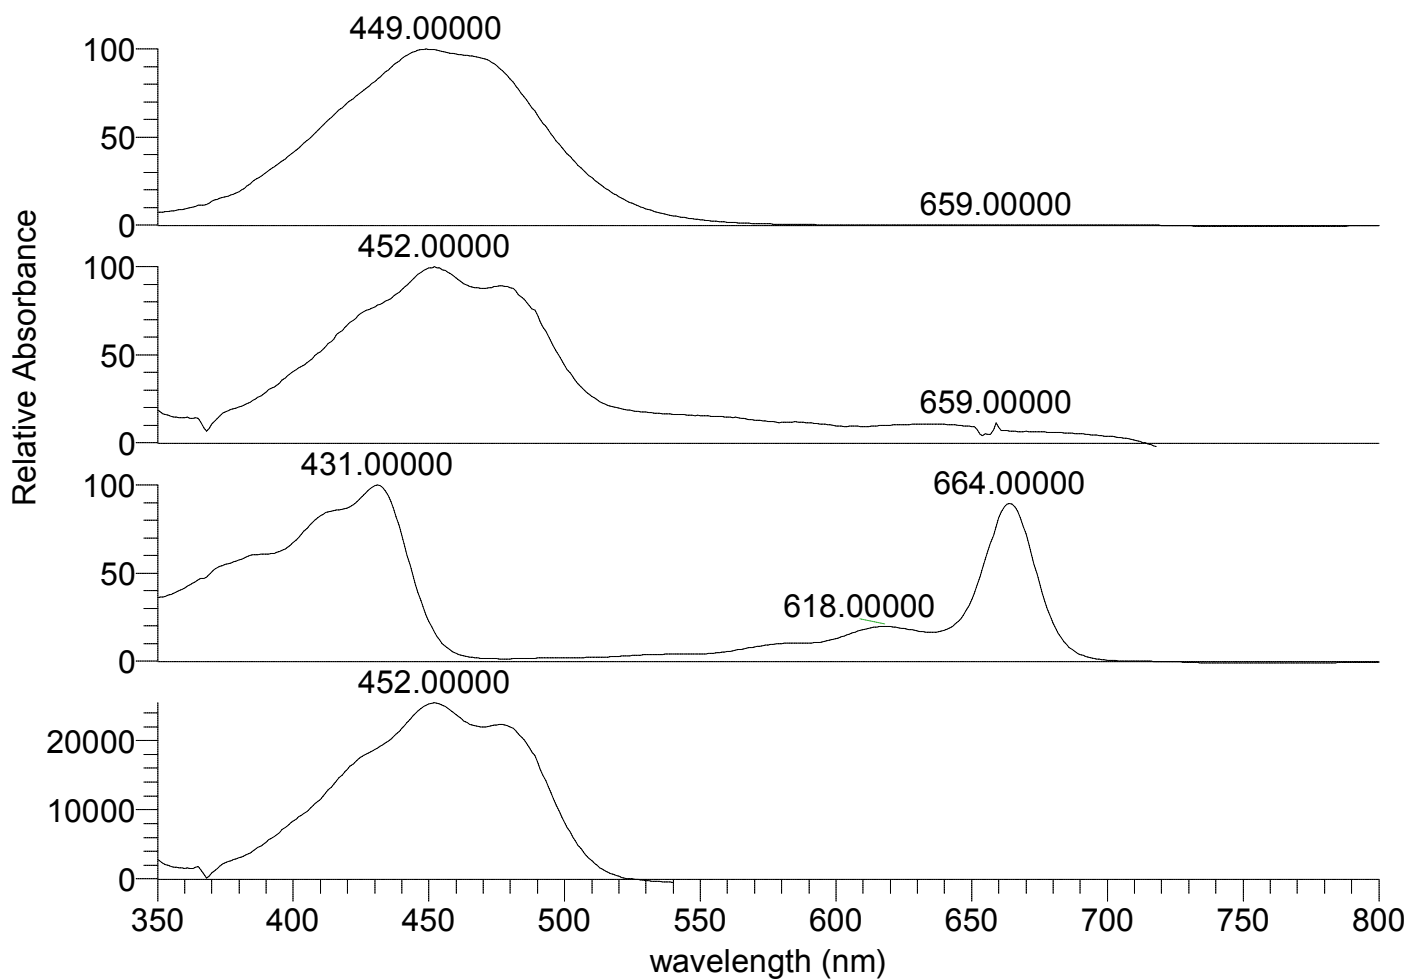NL:  
3.20E5  
11#6270  
RT: 20.90  
AV: 1NL:  
1.43E4  
11#7434  
RT: 24.78  
AV: 1NL:  
3.42E5  
11#10952  
RT: 36.51  
AV: 1NL:  
2.54E4  
11#13203  
RT: 44.01  
AV: 1

Supplement: Data_Sheet_1.zip [file Muestra11_HPLC-UV.pdf › Carotenoids/Muestra11_HPLC-UV.pdf]

RT: 0.00 - 61.20

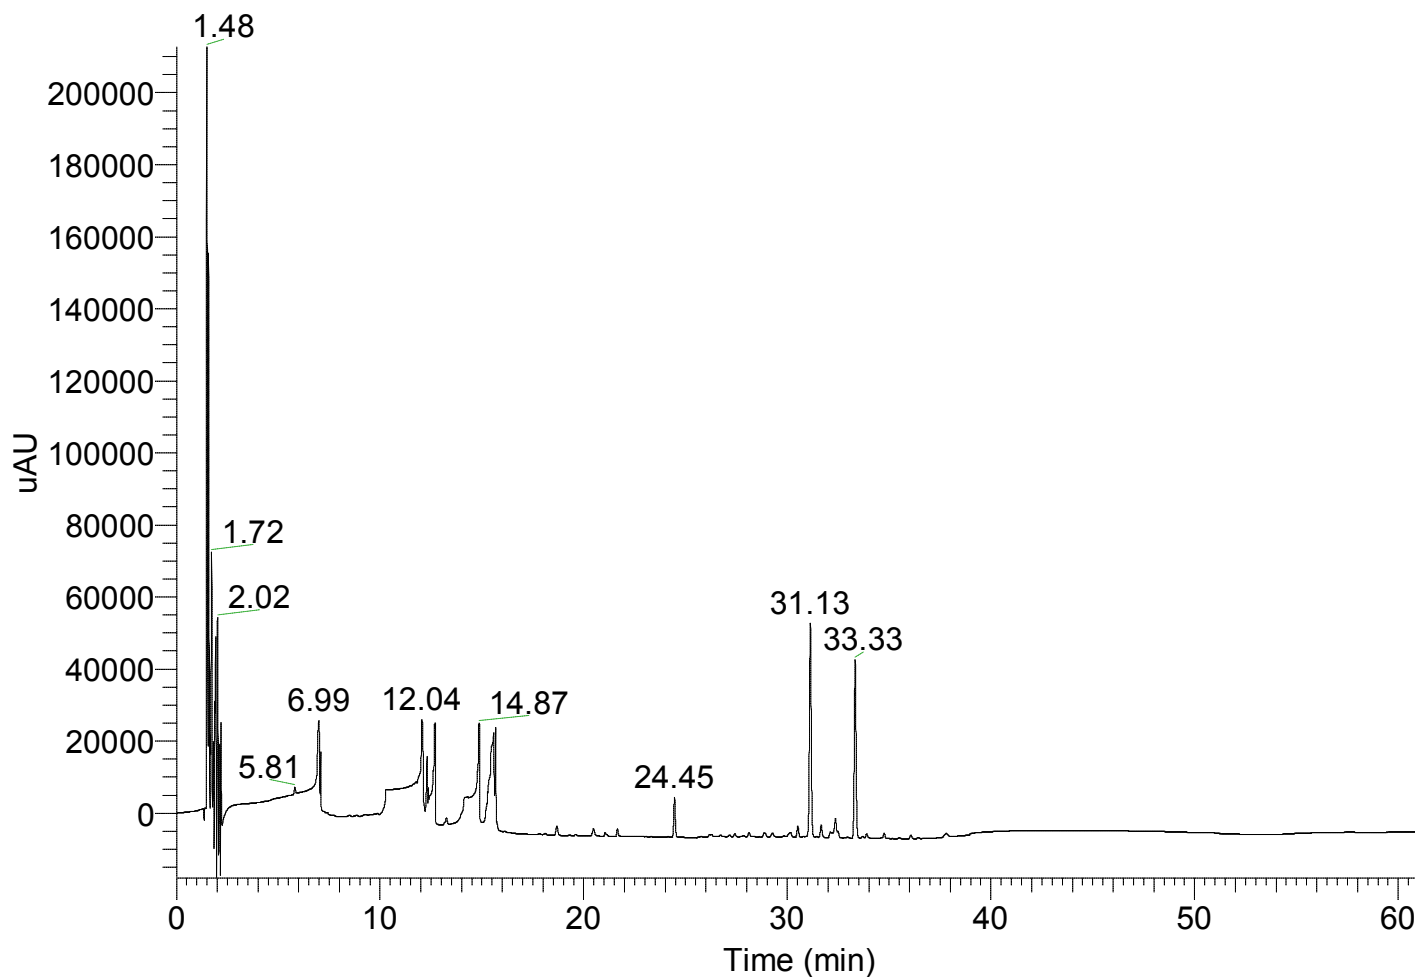

NL:  
2.13E5  
Total Scan  
PDA 120

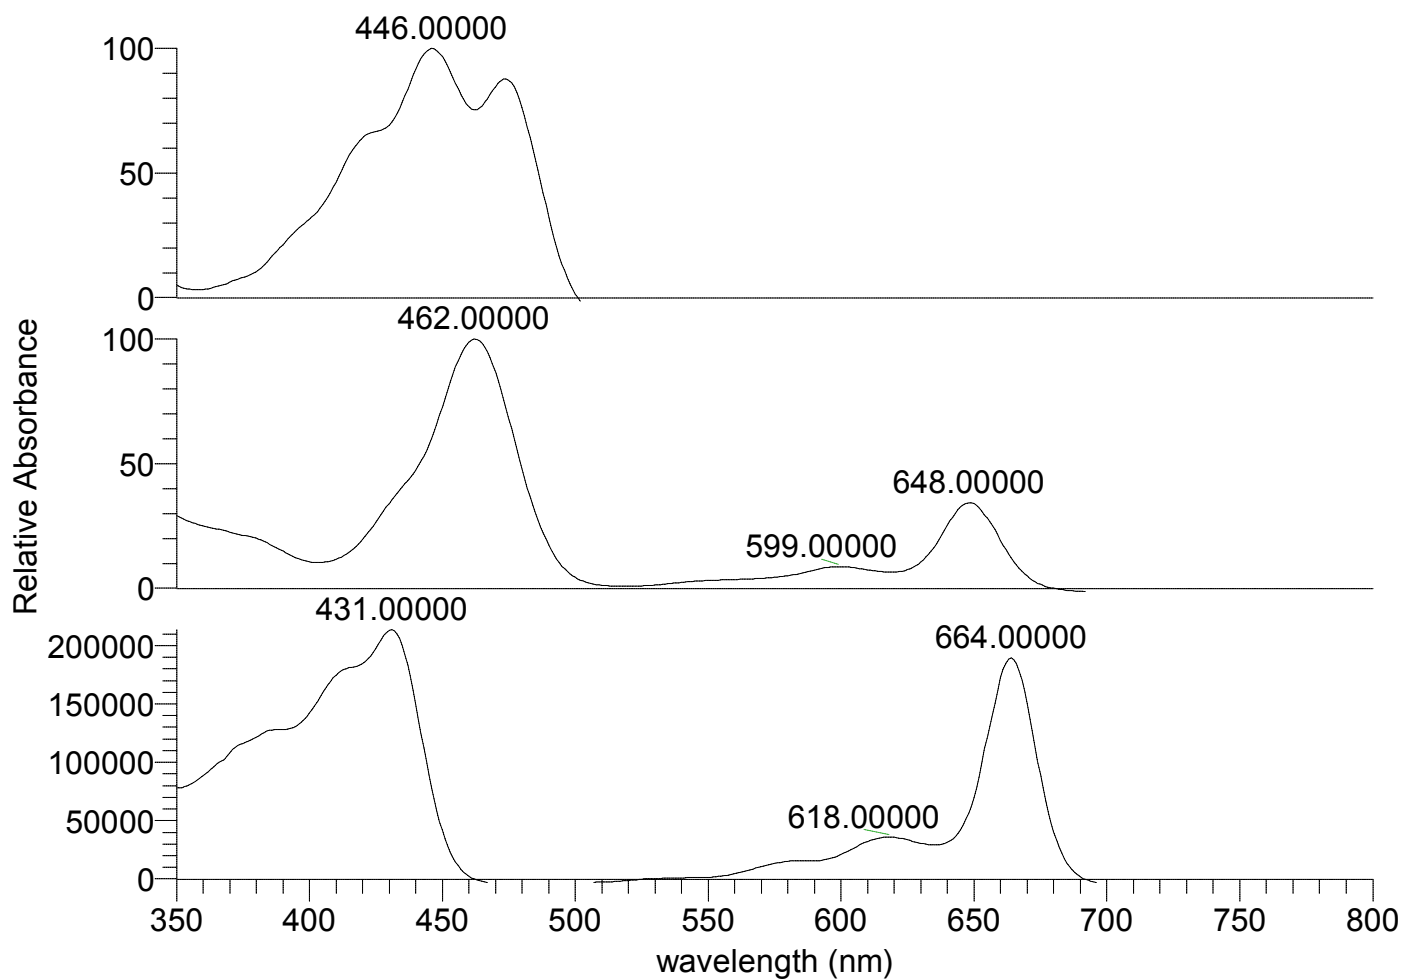

NL:  
5.50E4  
120#14669  
RT: 24.45  
AV: 1

NL:  
3.55E5  
120#18677  
RT: 31.13  
AV: 1

NL:  
2.13E5  
120#19997  
RT: 33.33  
AV: 1

Supplement: Data_Sheet_1.zip [file Muestra120_HPLC-UV.pdf › Carotenoids/Muestra120_HPLC-UV.pdf]

RT: 13.41 - 55.44

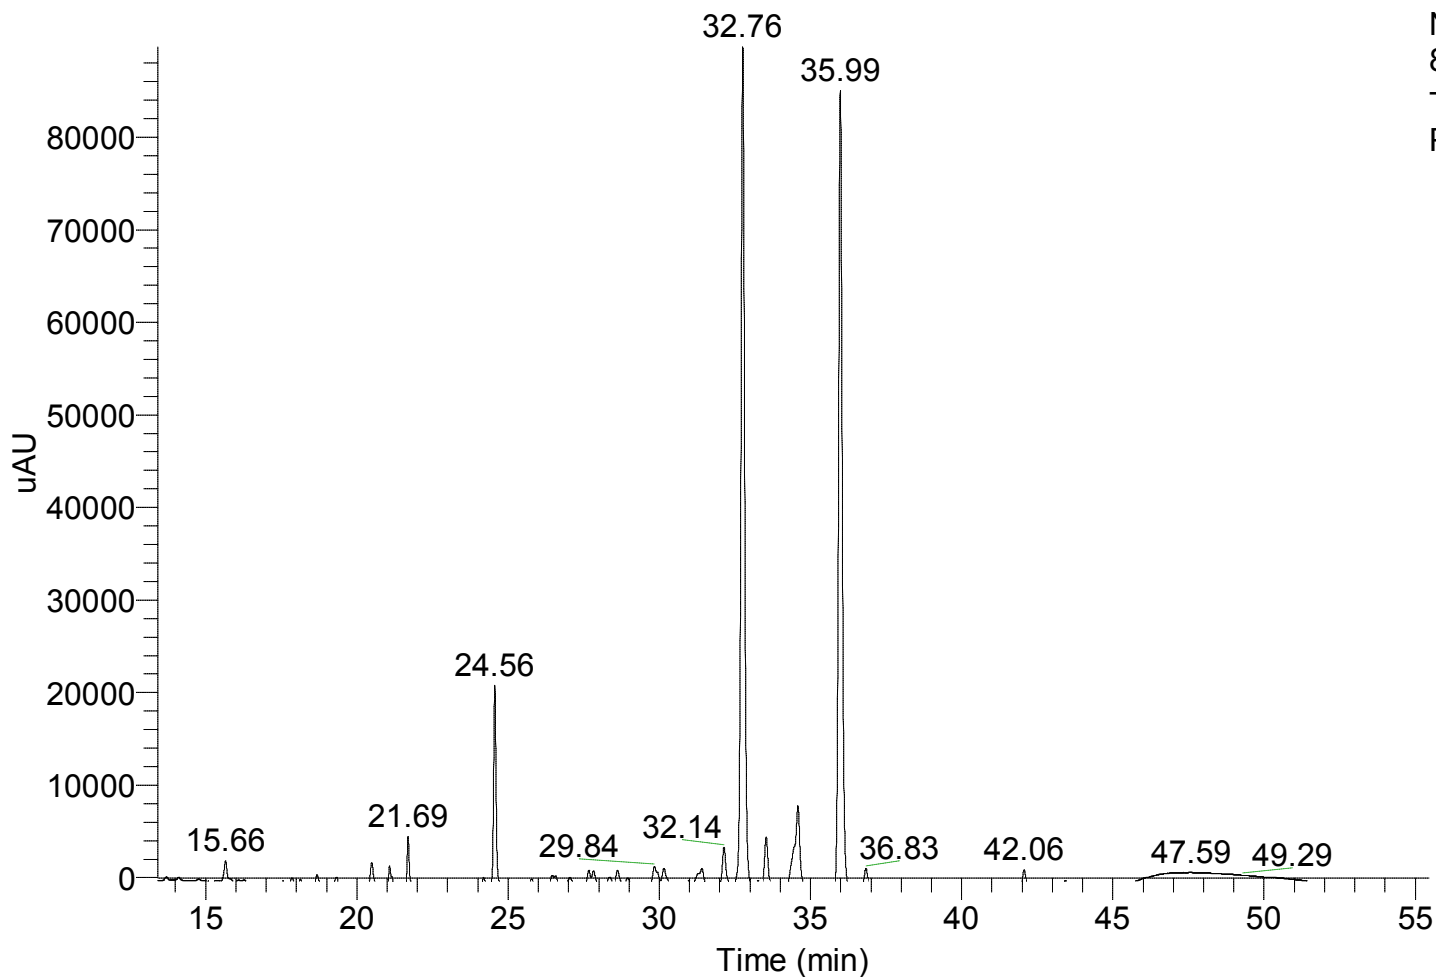

NL:  
8.97E4  
Total Scan  
PDA 121

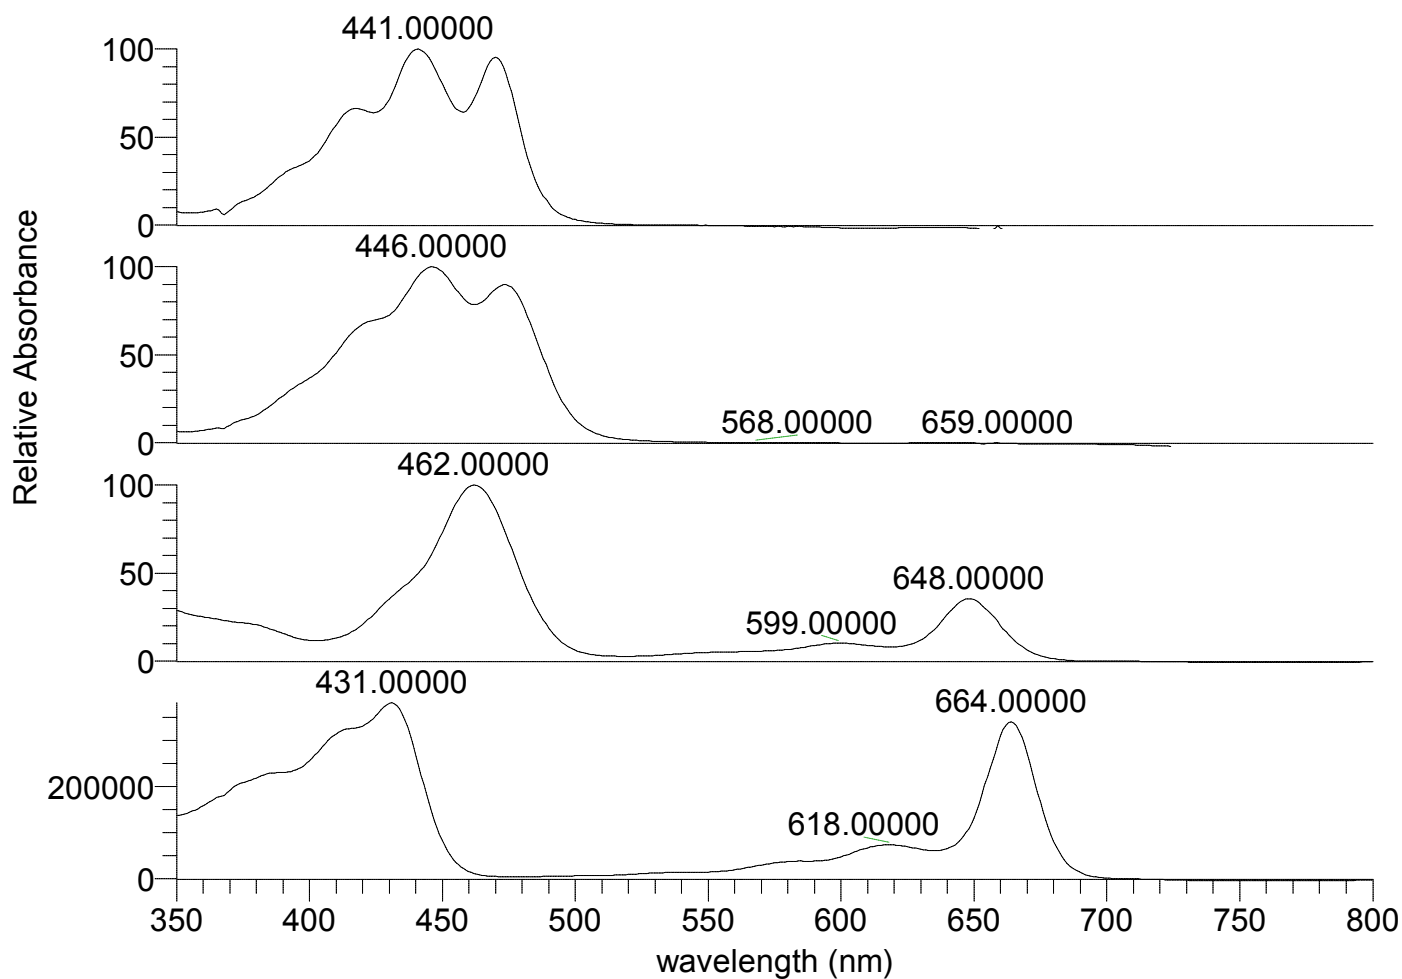

NL:  
3.48E4  
121#6508  
RT: 21.69  
AV: 1

NL:  
1.24E5  
121#7367  
RT: 24.56  
AV: 1

NL:  
5.53E5  
121#9829  
RT: 32.76  
AV: 1

NL:  
3.81E5  
121#10797  
RT: 35.99  
AV: 1

Supplement: Data_Sheet_1.zip [file Muestra121_HPLC-UV.pdf › Carotenoids/Muestra121_HPLC-UV.pdf]

RT: 0.00 - 51.79

NL:  
2.00E5  
Total Scan  
PDA 122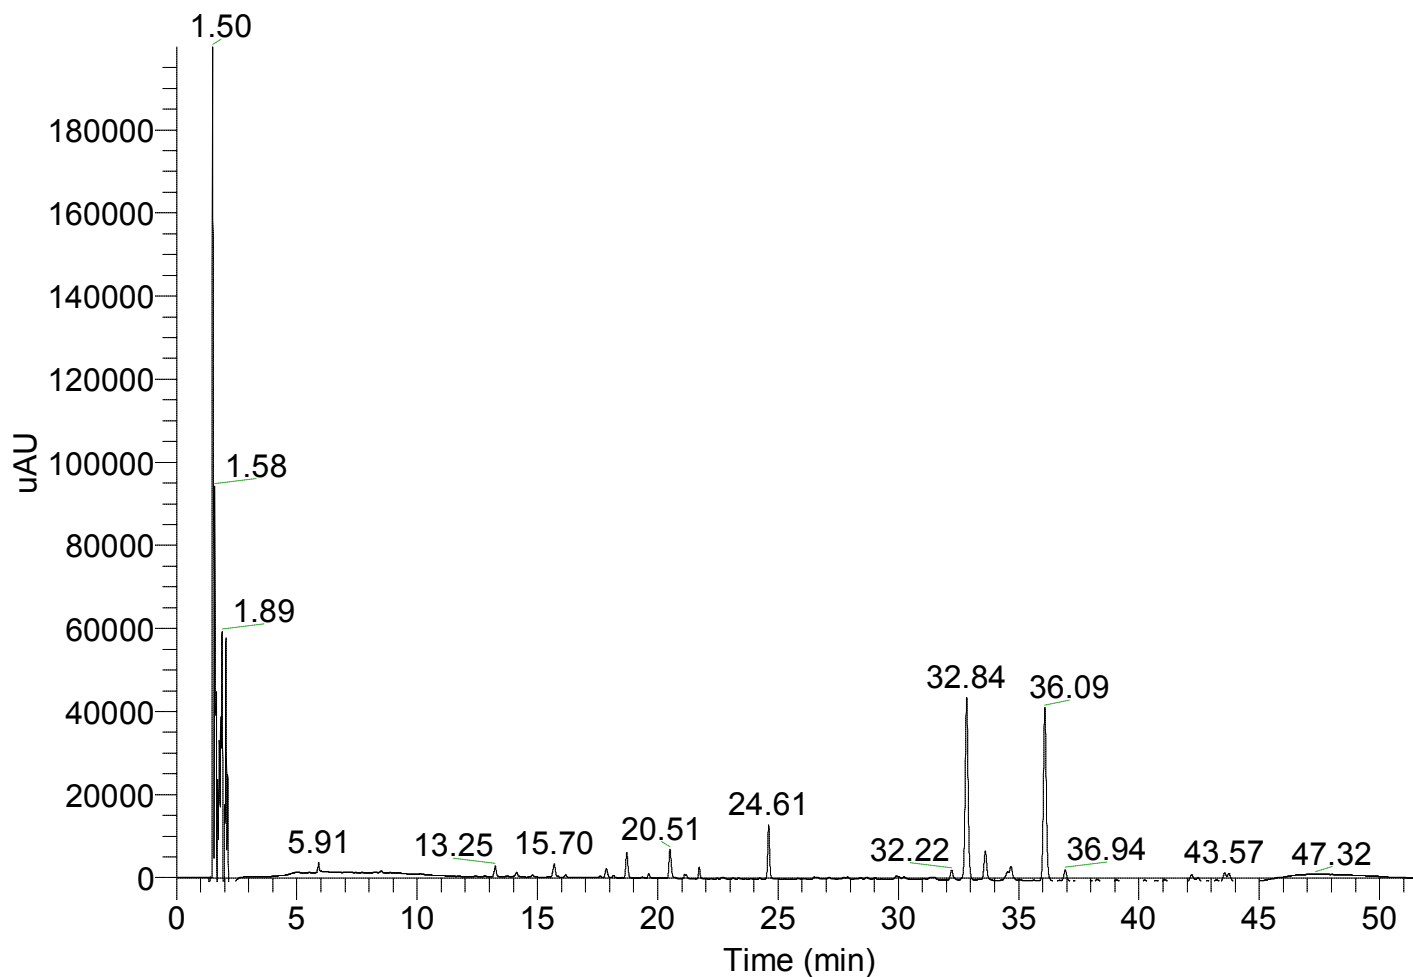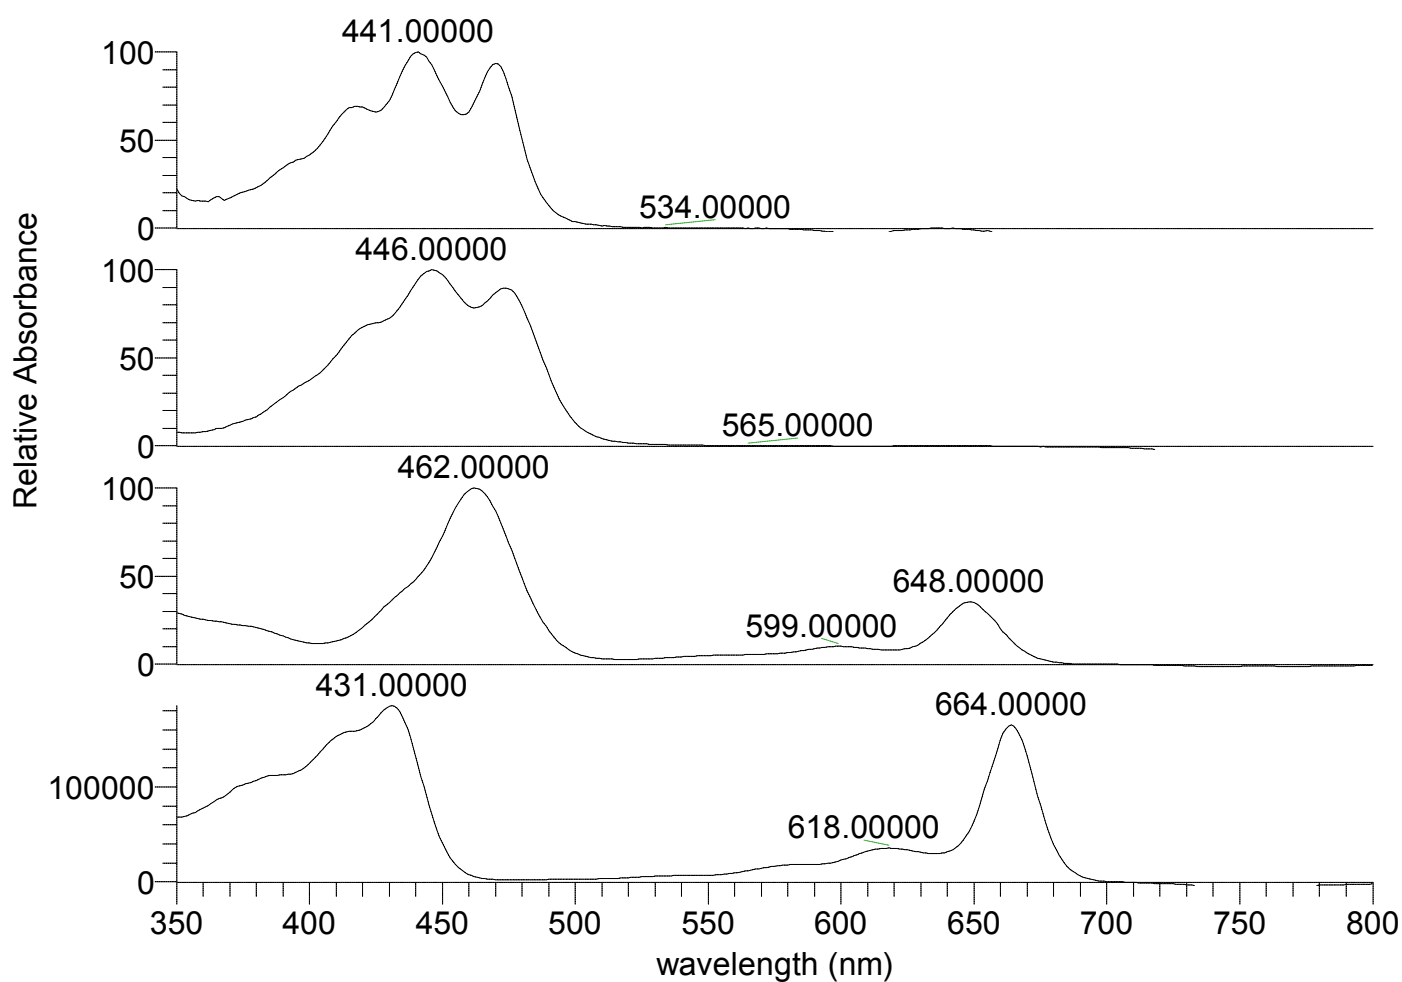NL:  
1.04E4  
122#6508  
RT: 21.69  
AV: 1NL:  
7.57E4  
122#7383  
RT: 24.61  
AV: 1NL:  
2.69E5  
122#9851  
RT: 32.84  
AV: 1NL:  
1.85E5  
122#10827  
RT: 36.09  
AV: 1

Supplement: Data_Sheet_1.zip [file Muestra122_HPLC-UV.pdf › Carotenoids/Muestra122_HPLC-UV.pdf]

RT: 0.00 - 61.20

NL:  
2.05E5  
Total Scan  
PDA 123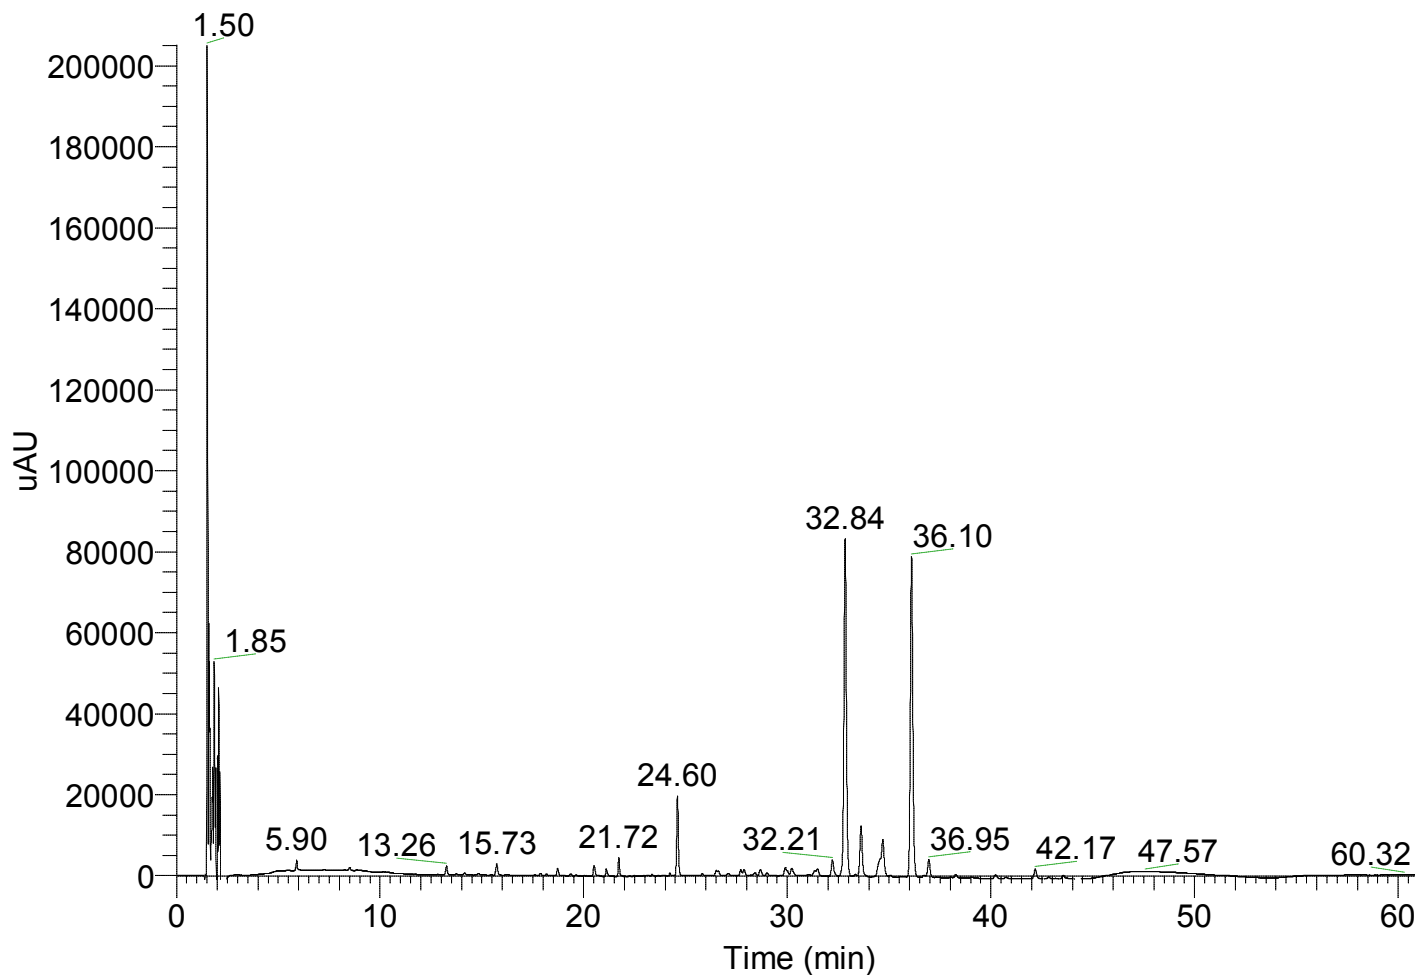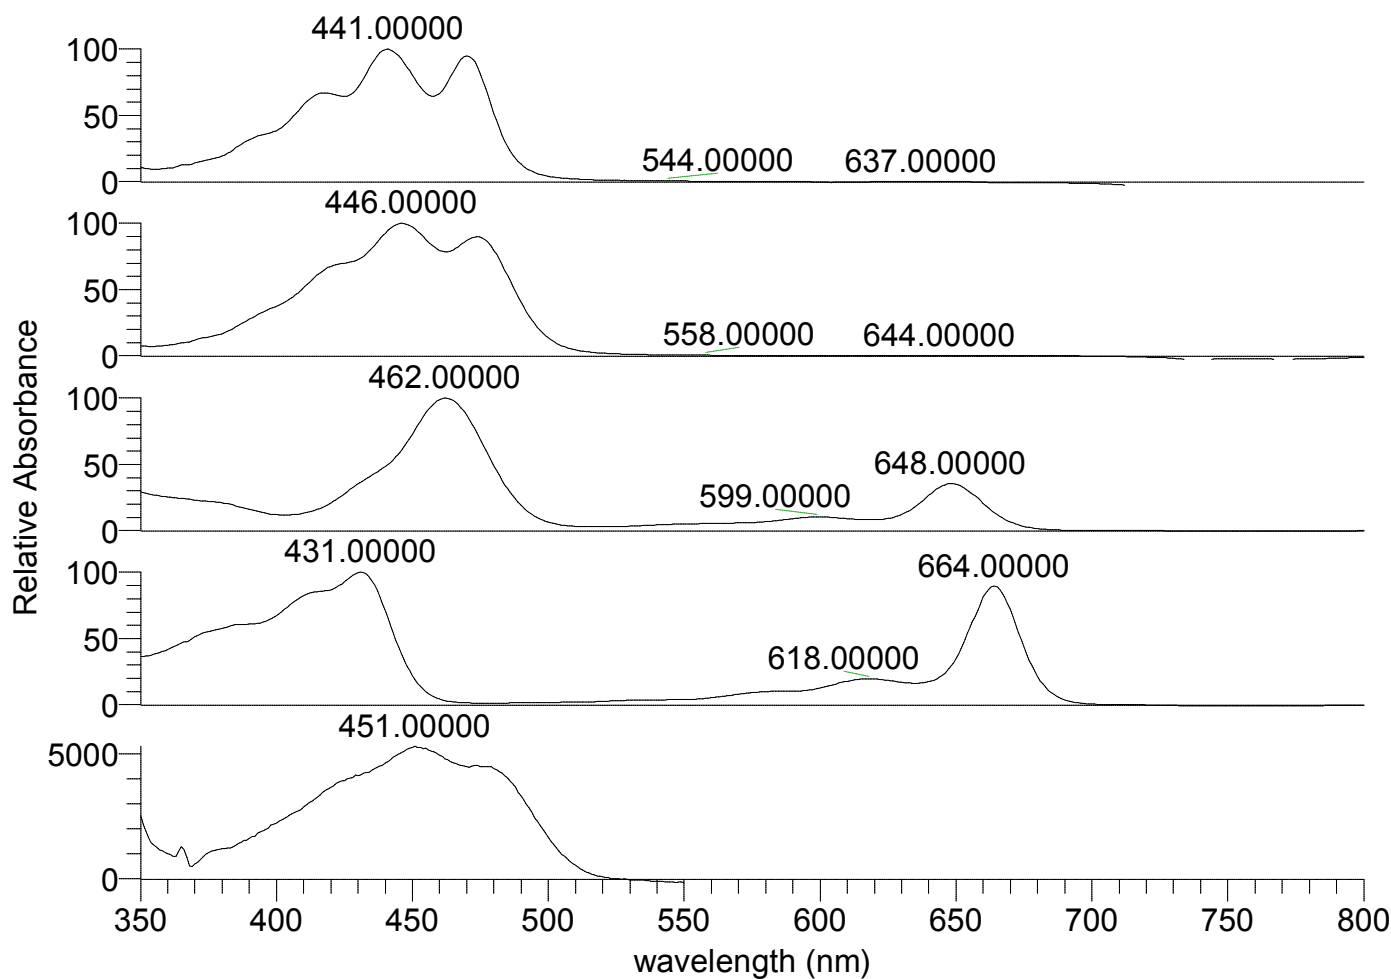

NL:  
3.14E4  
123#6517  
RT: 21.72  
AV: 1

NL:  
1.14E5  
123#7381  
RT: 24.60  
AV: 1

NL:  
5.08E5  
123#9853  
RT: 32.84  
AV: 1

NL:  
3.50E5  
123#10831  
RT: 36.10  
AV: 1

NL:  
5.29E3  
123#13066  
RT: 43.55  
AV: 1

Supplement: Data_Sheet_1.zip [file Muestra123_HPLC-UV.pdf › Carotenoids/Muestra123_HPLC-UV.pdf]

RT: 11.67 - 46.93

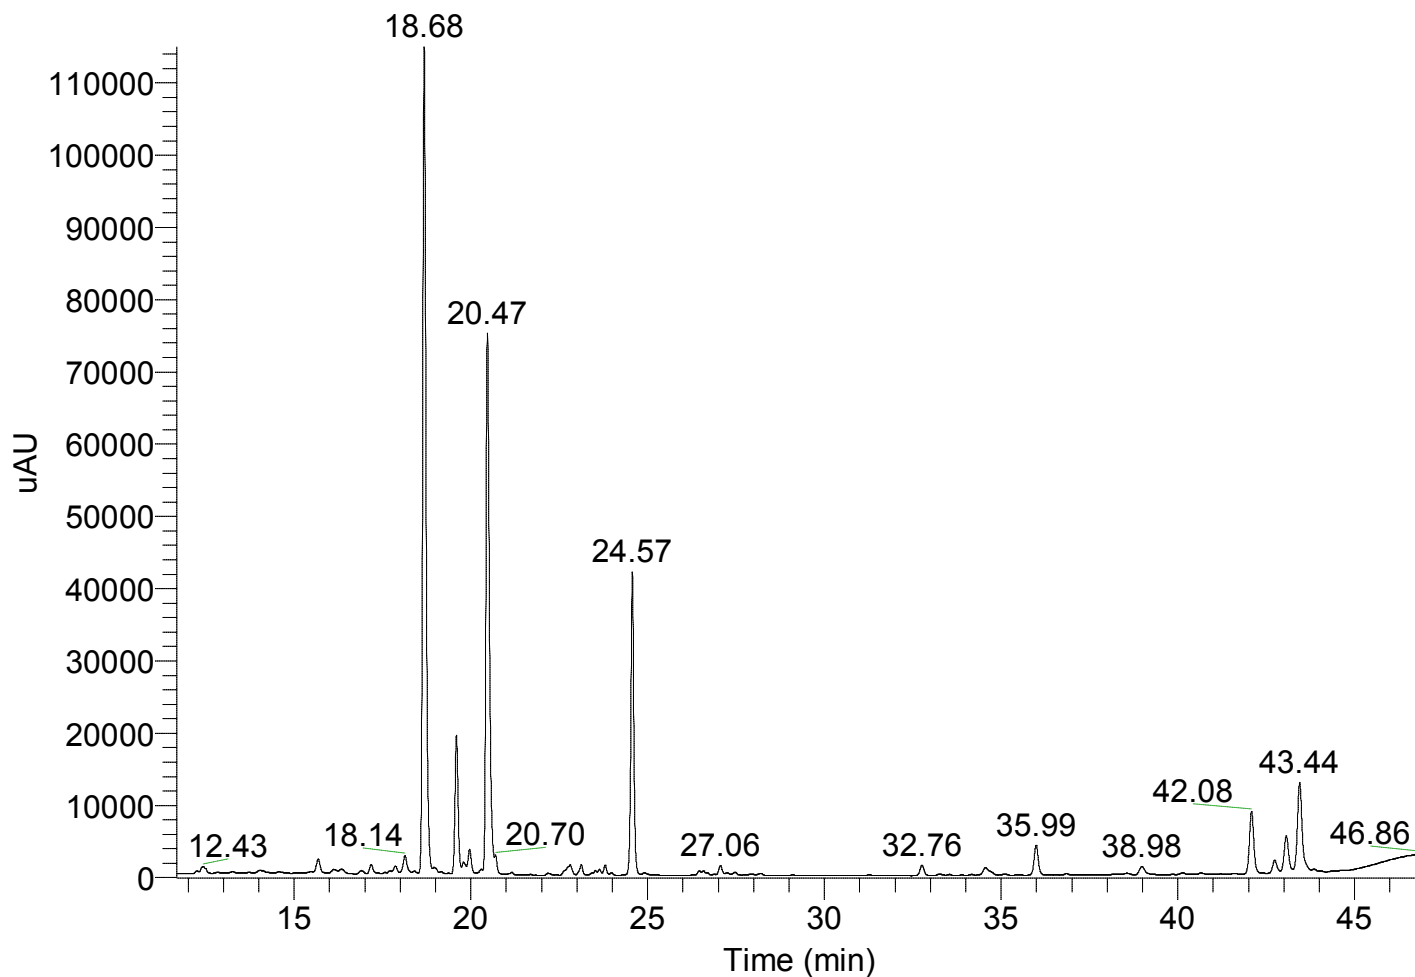

NL:  
1.15E5  
Total Scan  
PDA 125

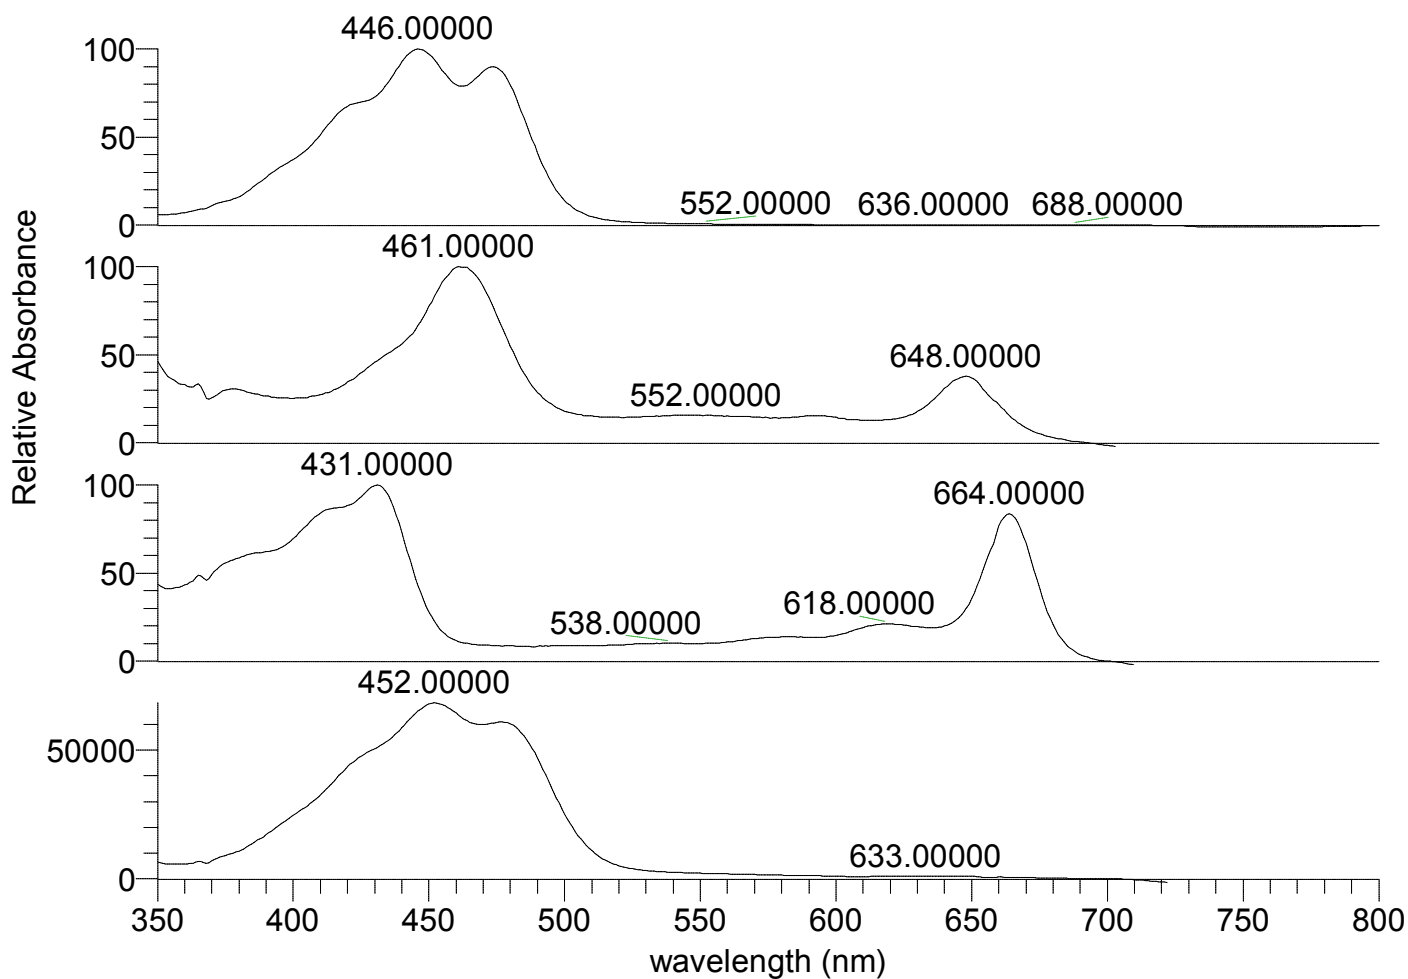

Supplement: Data_Sheet_1.zip [file Muestra125_HPLC-UV.pdf › Carotenoids/Muestra125_HPLC-UV.pdf]

RT: 13.88 - 48.90

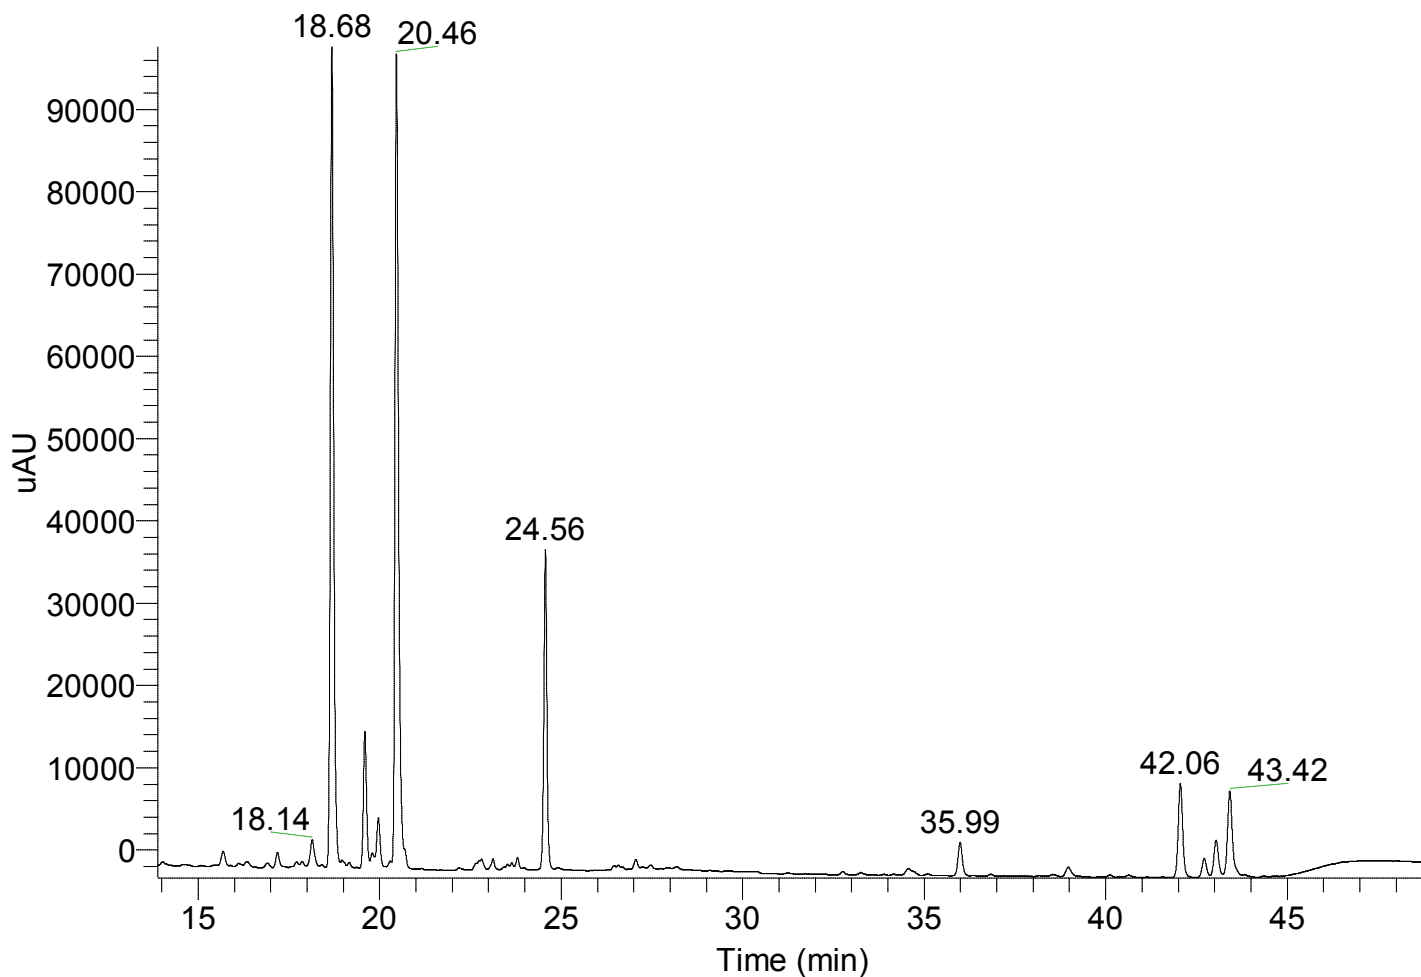

NL:  
9.76E4  
Total Scan  
PDA 126

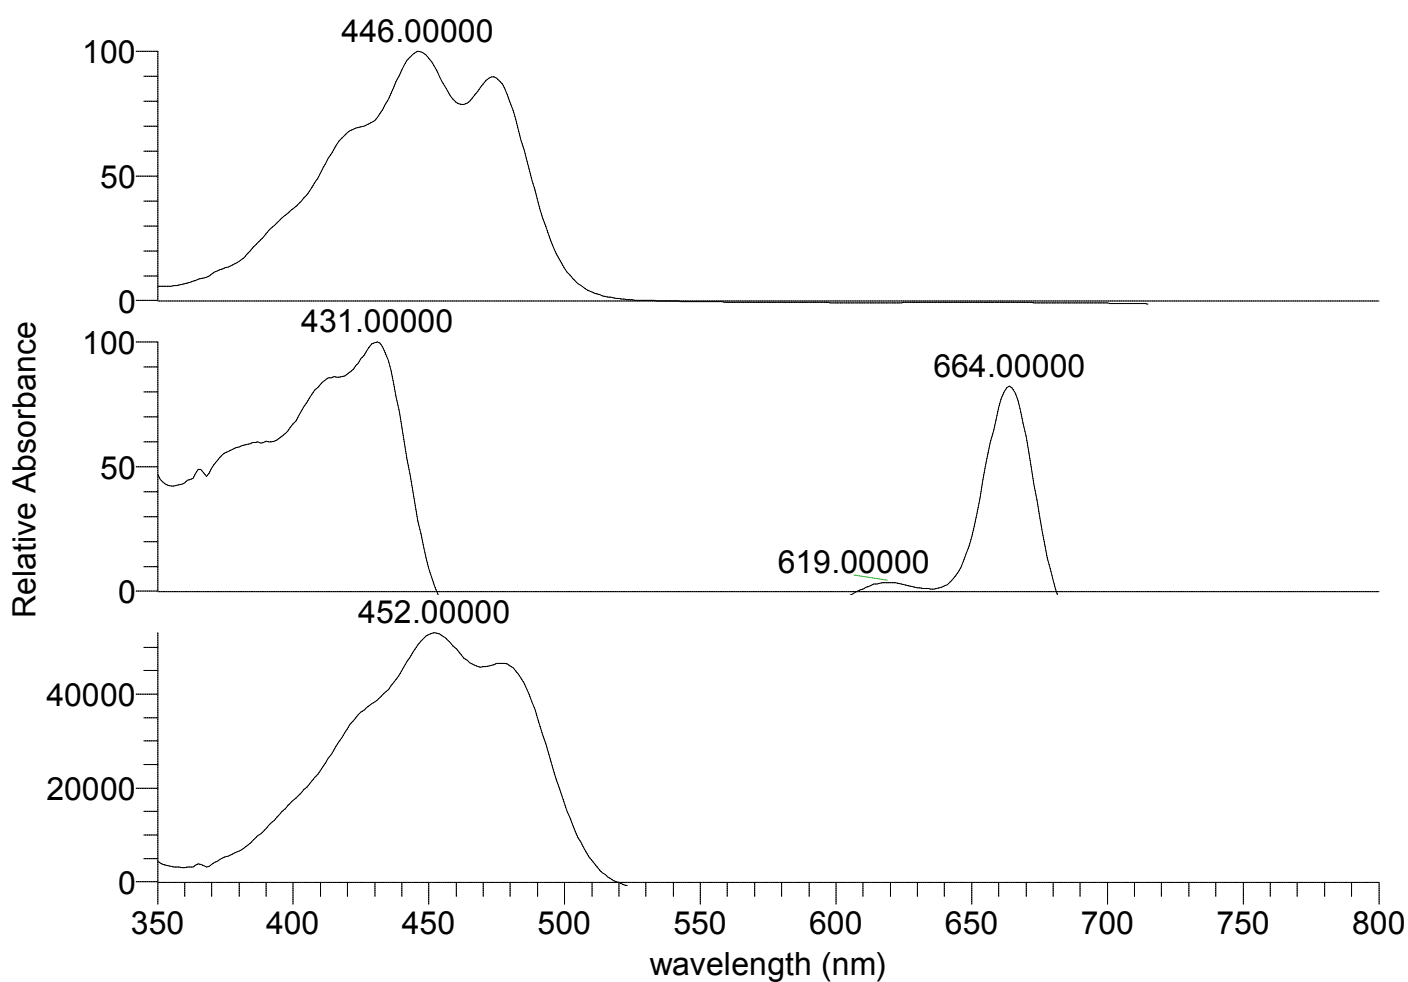

NL:  
2.18E5  
126#7368  
RT: 24.56  
AV: 1

NL:  
1.57E4  
126#10797  
RT: 35.99  
AV: 1

NL:  
5.30E4  
126#13024  
RT: 43.41  
AV: 1

Supplement: Data_Sheet_1.zip [file Muestra126_HPLC-UV.pdf › Carotenoids/Muestra126_HPLC-UV.pdf]

RT: 0.00 - 61.23

NL:  
2.11E5  
Total Scan  
PDA 127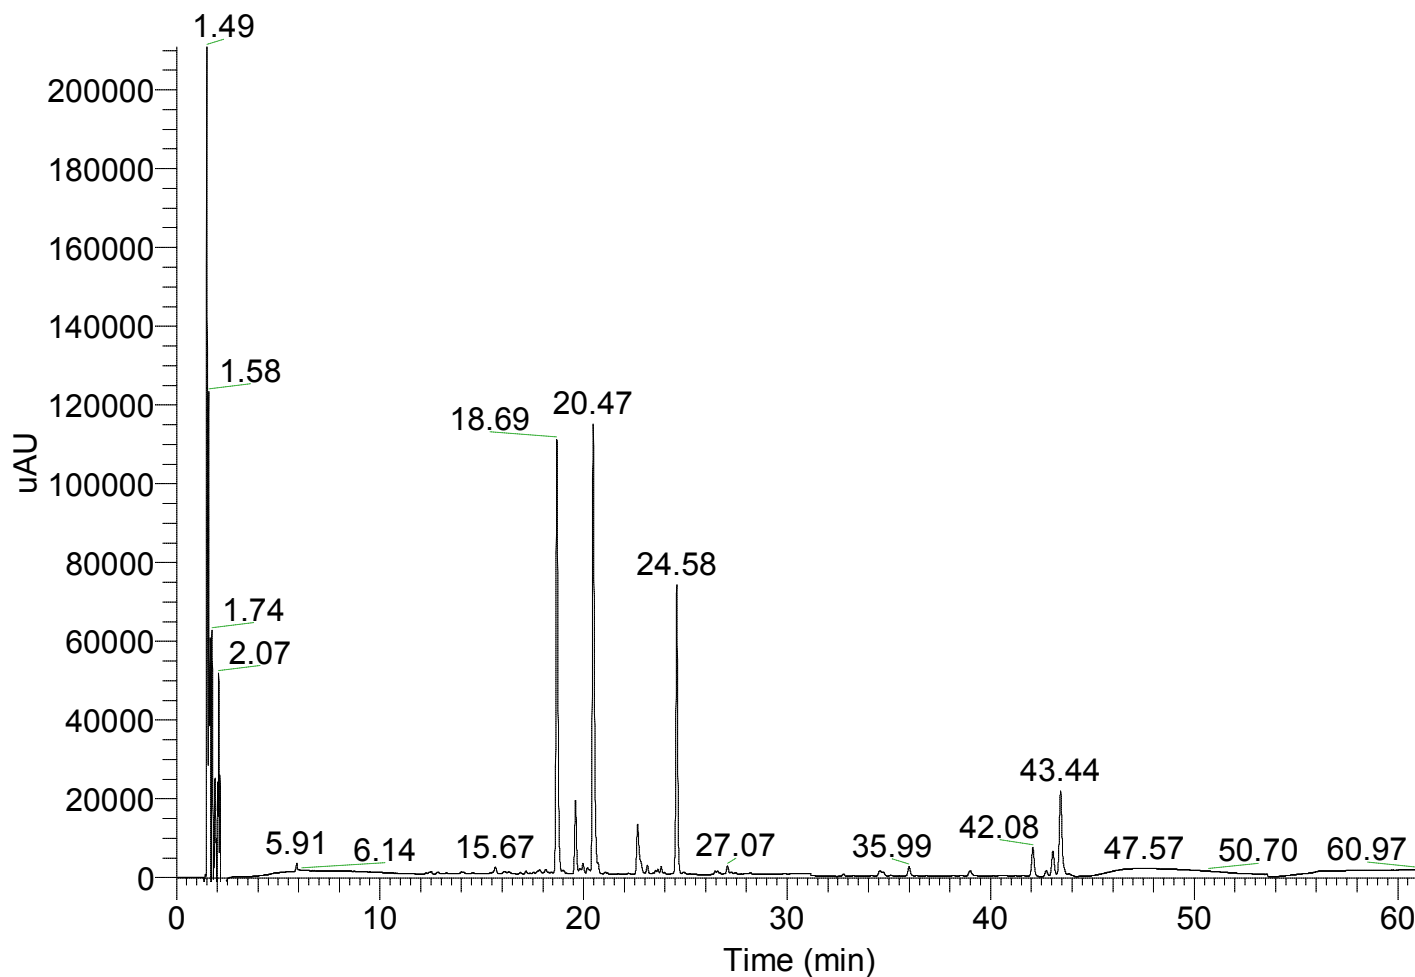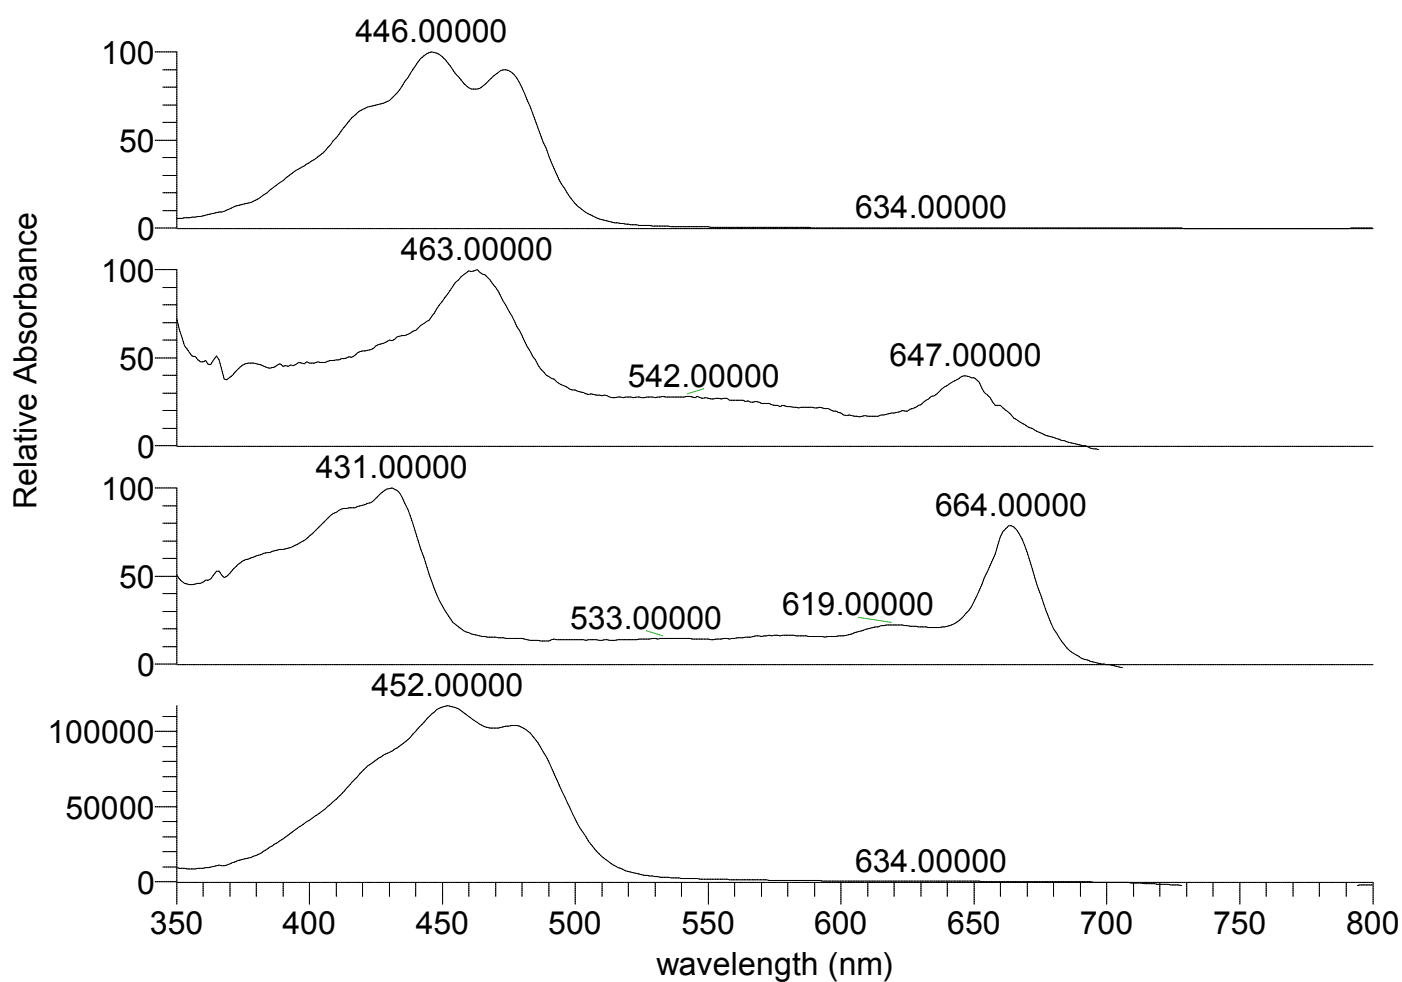NL:  
4.21E5  
127#7374  
RT: 24.58  
AV: 1NL:  
4.78E3  
127#9828  
RT: 32.76  
AV: 1NL:  
1.22E4  
127#10798  
RT: 35.99  
AV: 1NL:  
1.17E5  
127#13032  
RT: 43.44  
AV: 1

Supplement: Data_Sheet_1.zip [file Muestra127_HPLC-UV.pdf › Carotenoids/Muestra127_HPLC-UV.pdf]

RT: 14.68 - 46.95

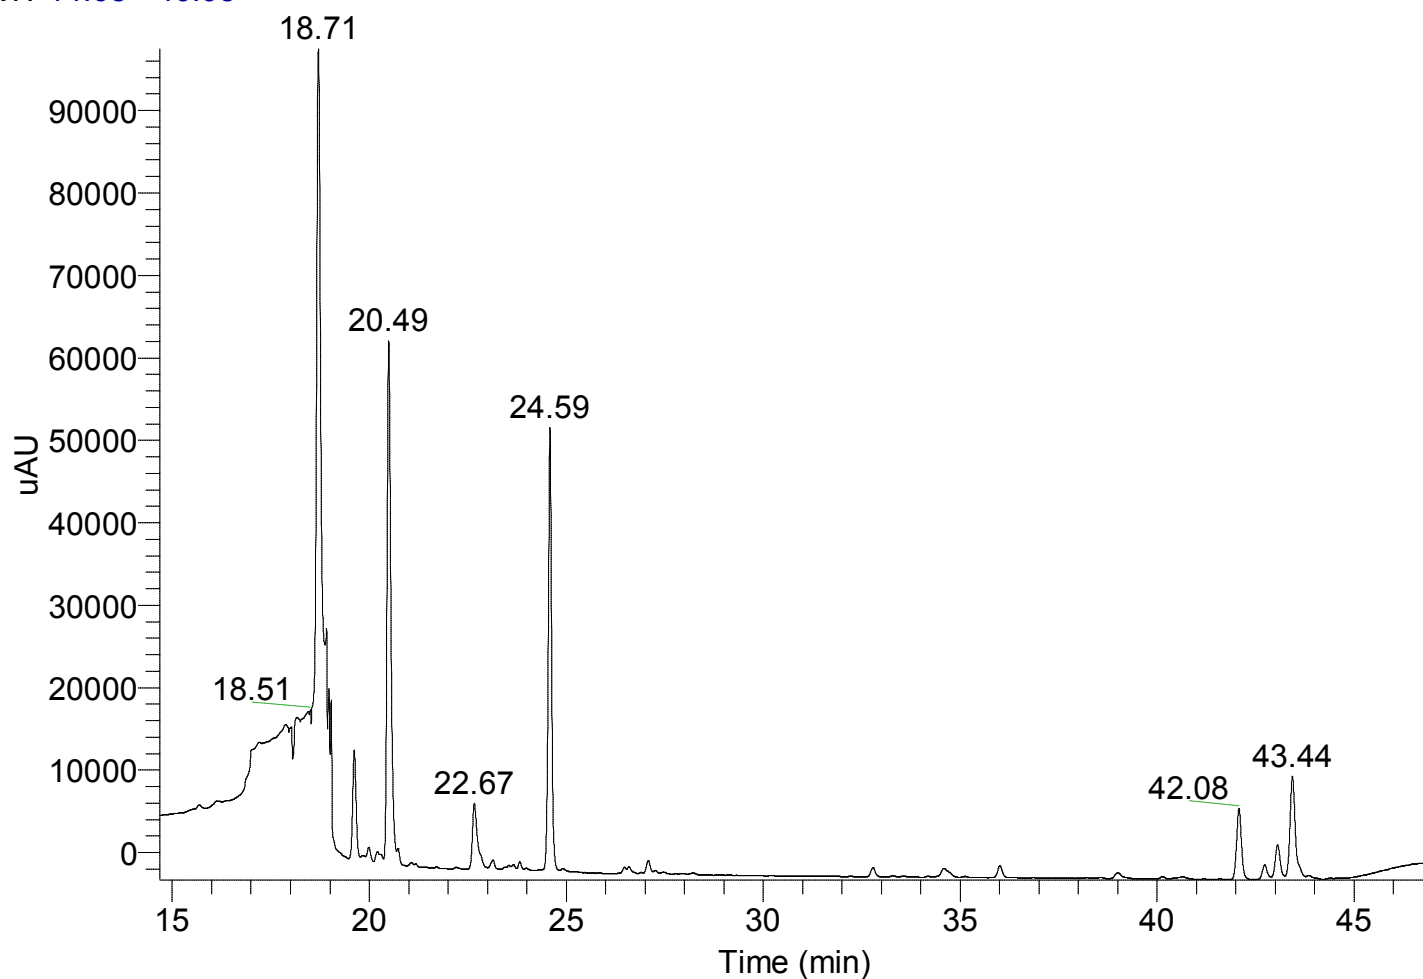

NL:  
9.74E4  
Total Scan  
PDA 128

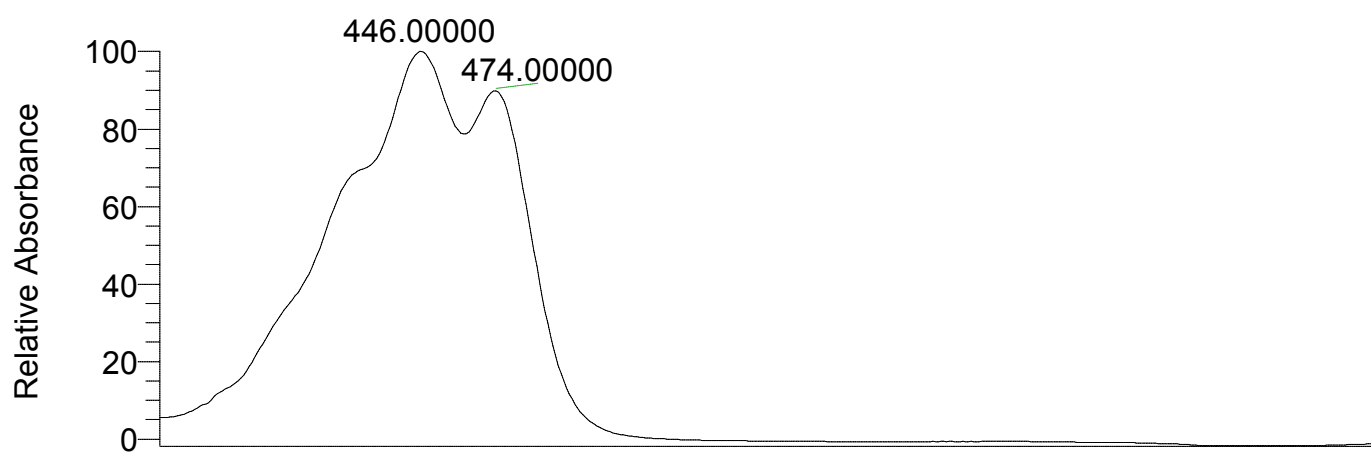

NL:  
3.03E5  
128#7377  
RT: 24.59  
AV: 1

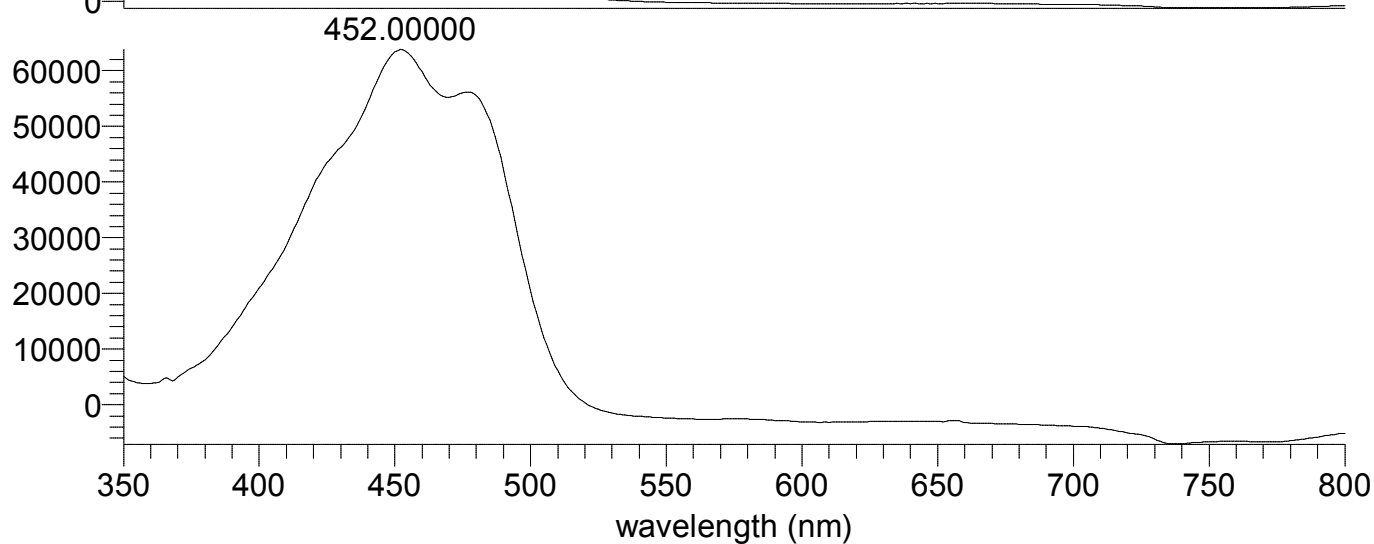

NL:  
6.38E4  
128#13032  
RT: 43.44  
AV: 1

Supplement: Data_Sheet_1.zip [file Muestra128_HPLC-UV.pdf › Carotenoids/Muestra128_HPLC-UV.pdf]

RT: 0.00 - 61.20

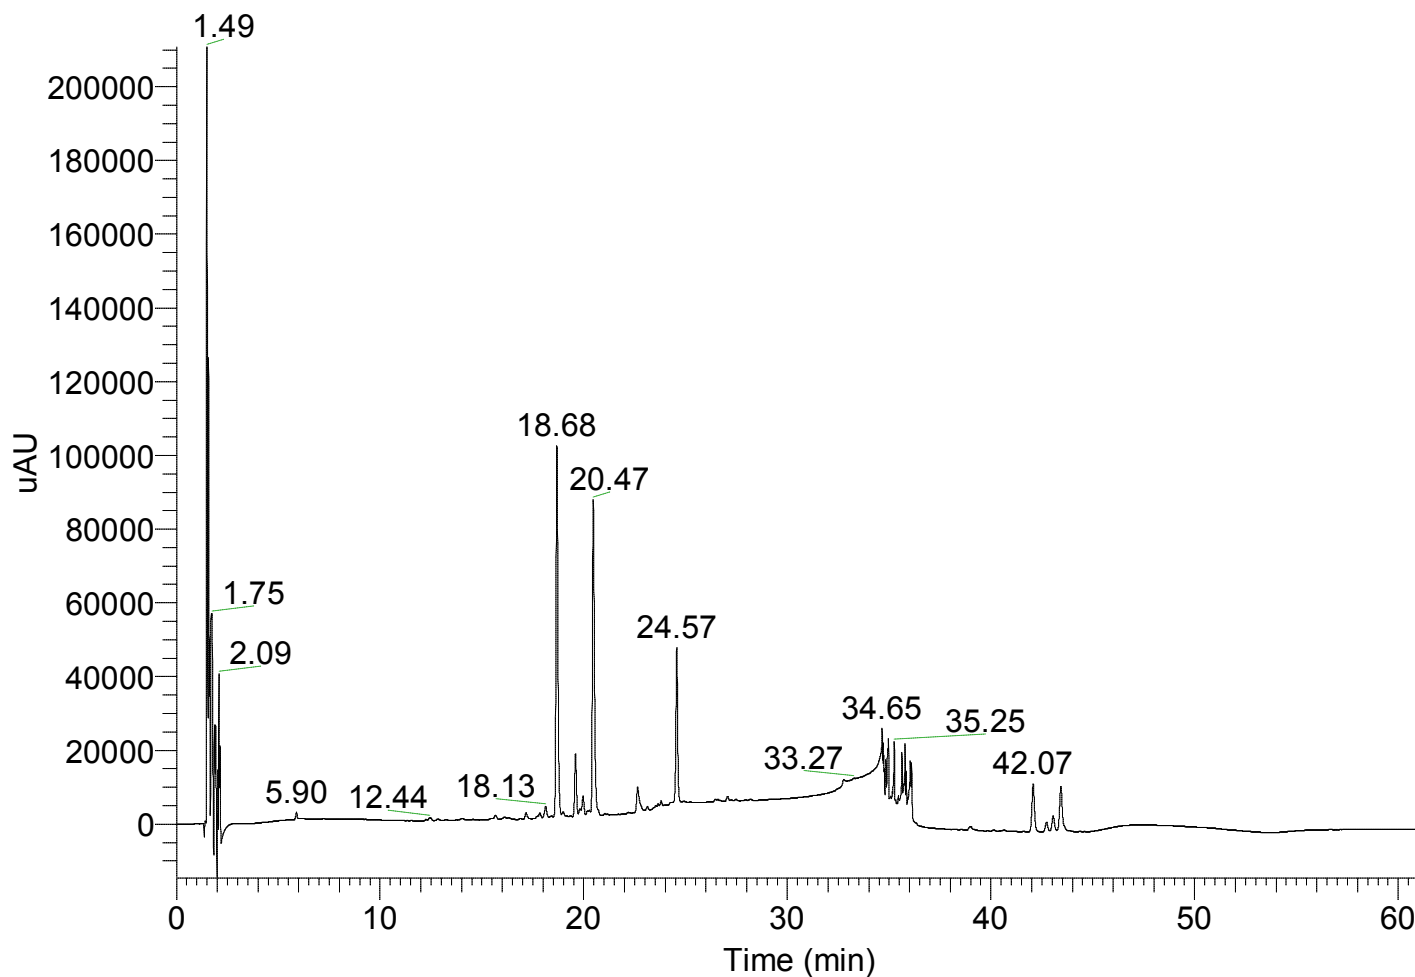

NL:  
2.11E5  
Total Scan  
PDA 129

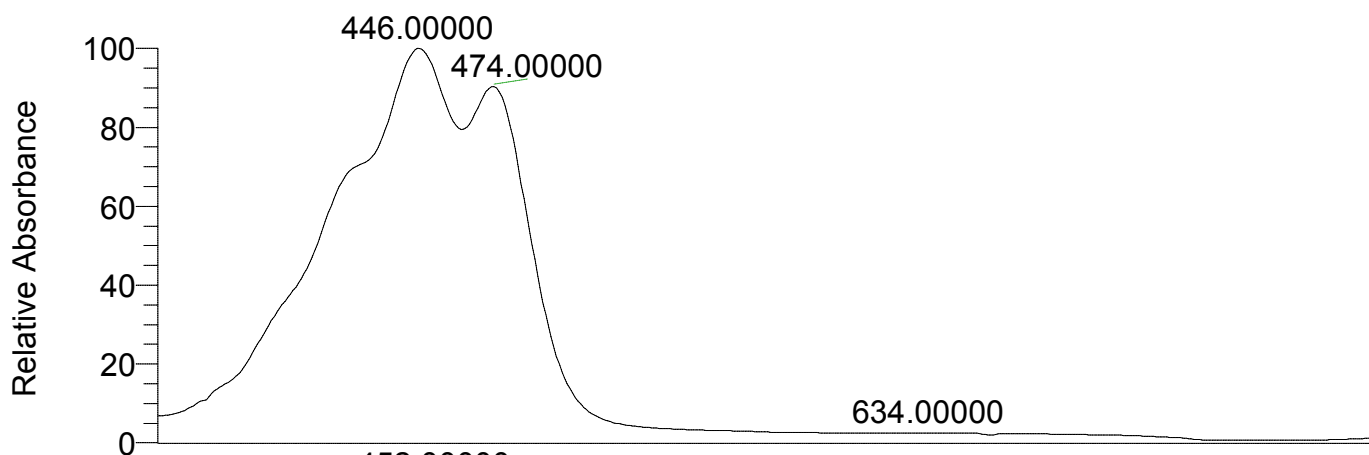

NL:  
2.47E5  
129#7371  
RT: 24.57  
AV: 1

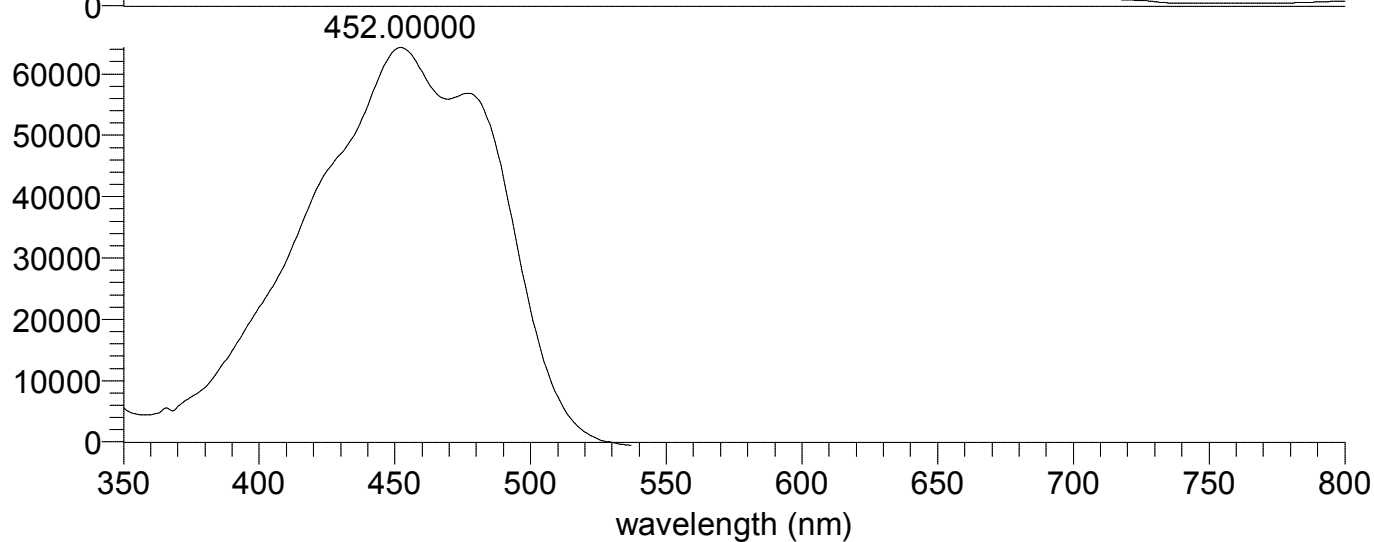

NL:  
6.43E4  
129#13029  
RT: 43.43  
AV: 1

Supplement: Data_Sheet_1.zip [file Muestra129_HPLC-UV.pdf › Carotenoids/Muestra129_HPLC-UV.pdf]

RT: 0.00 - 61.20

NL:  
2.20E5  
Total Scan  
PDA 12

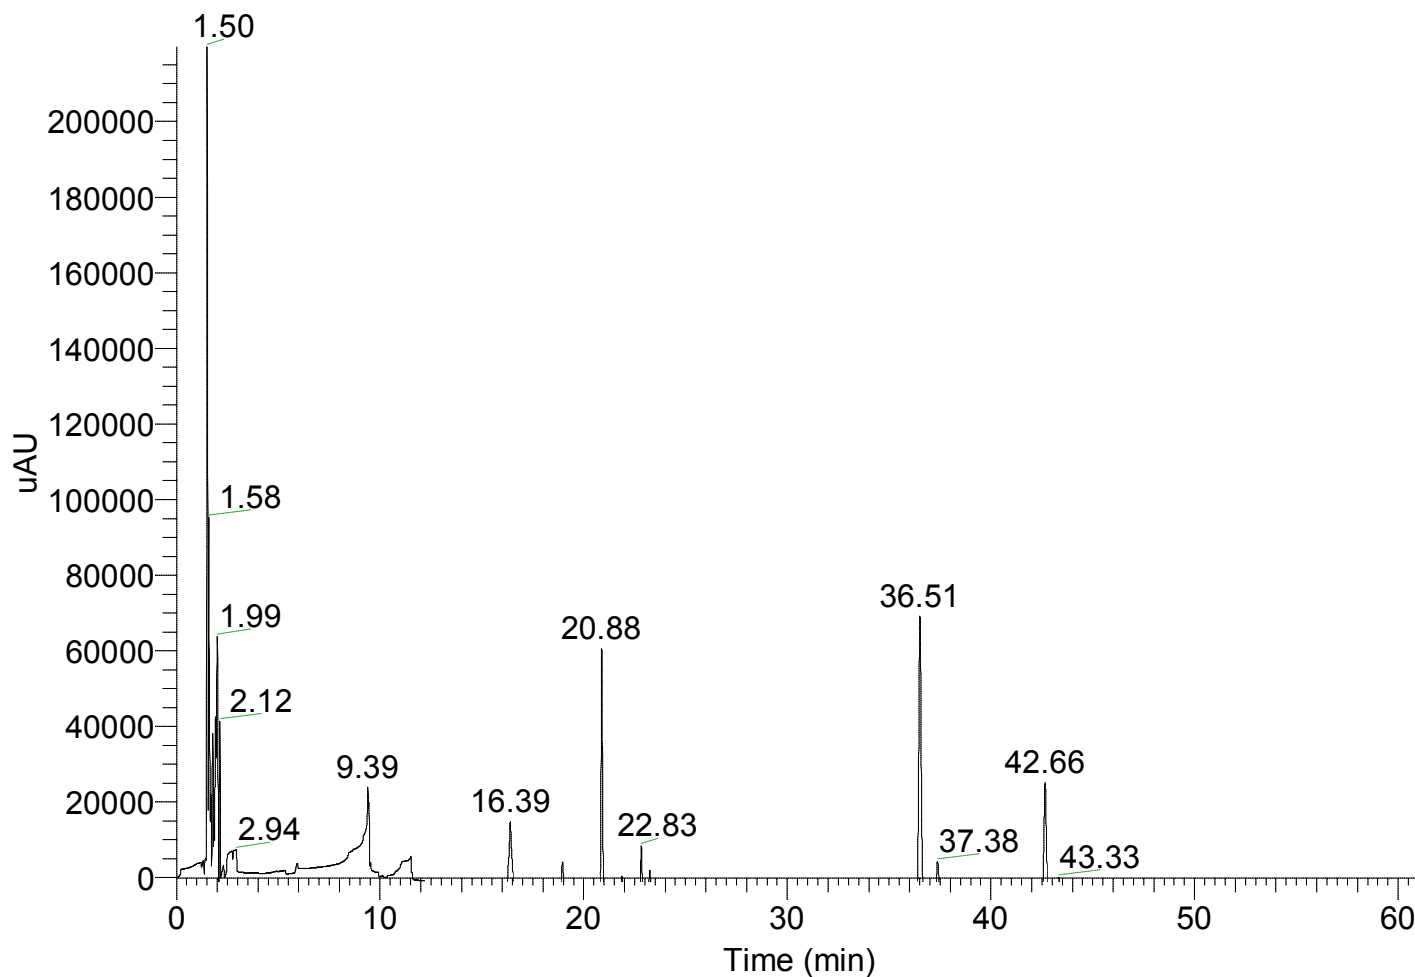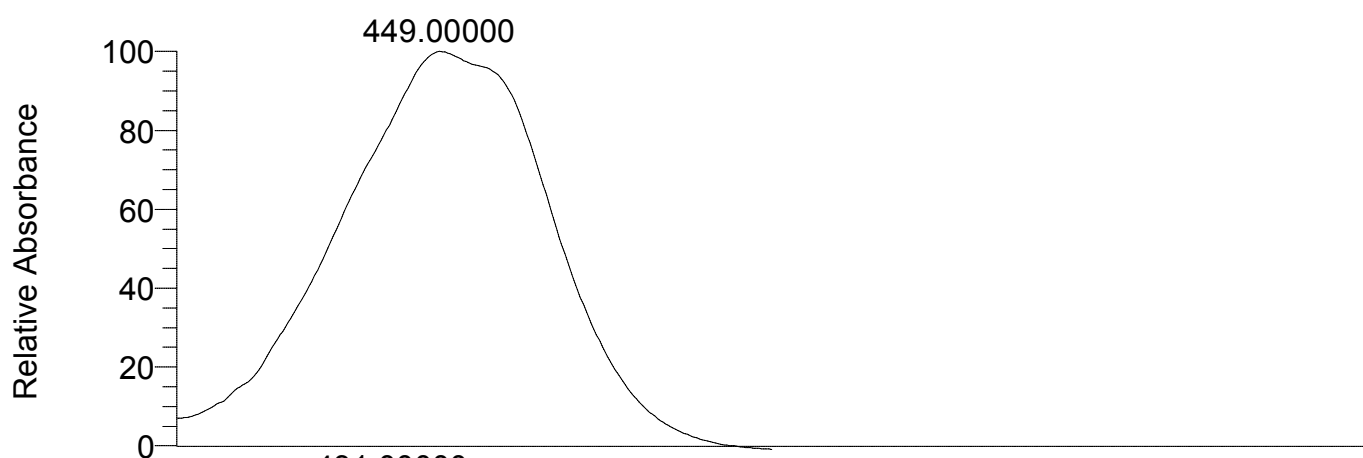

NL:  
2.93E5  
12#6263  
RT: 20.88  
AV: 1

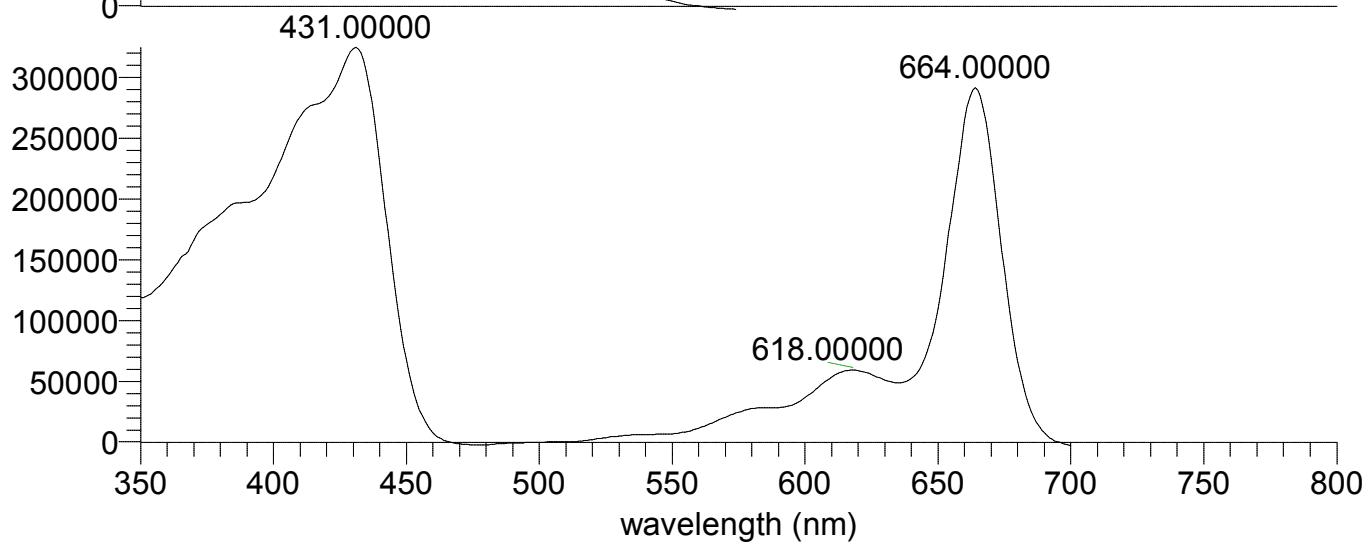

NL:  
3.25E5  
12#10952  
RT: 36.51  
AV: 1

Supplement: Data_Sheet_1.zip [file Muestra12_HPLC-UV.pdf › Carotenoids/Muestra12_HPLC-UV.pdf]

RT: 0.00 - 61.20

NL:  
2.15E5  
Total Scan  
PDA 130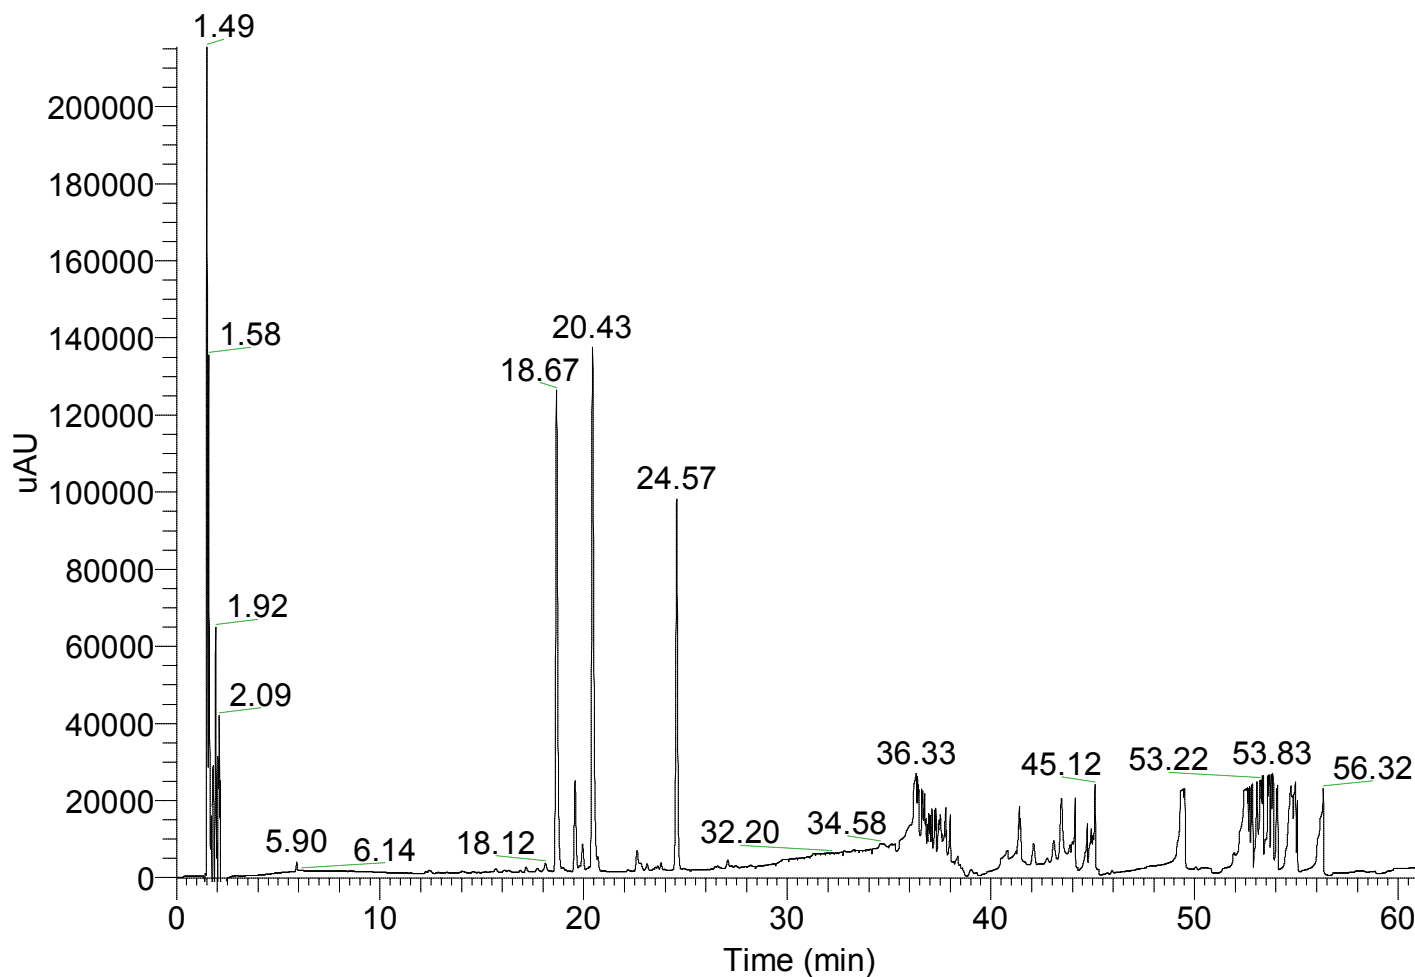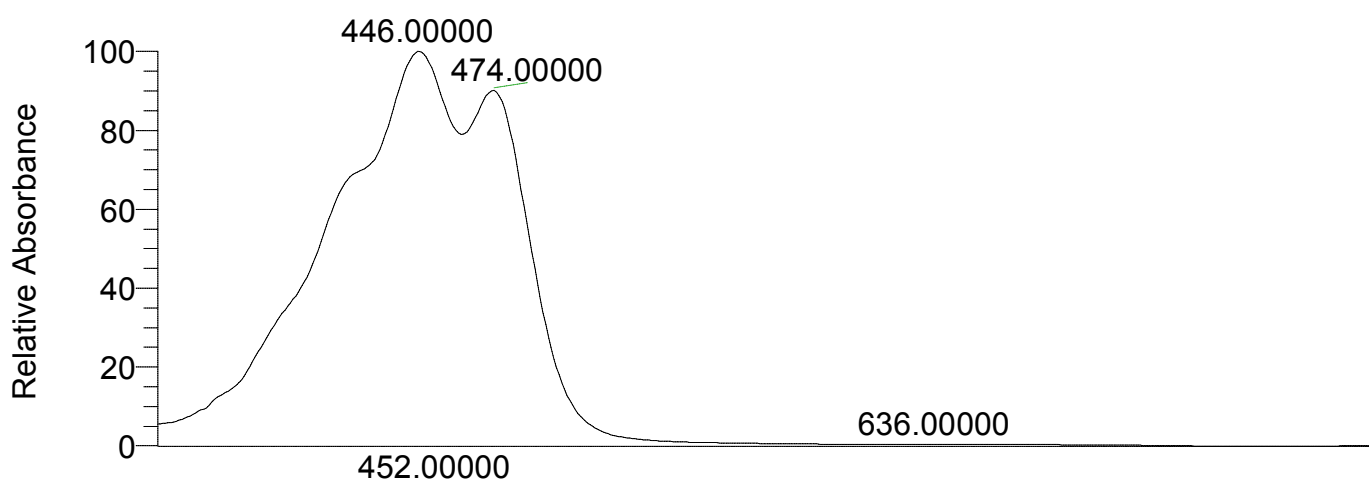NL:  
5.48E5  
130#7371  
RT: 24.57  
AV: 1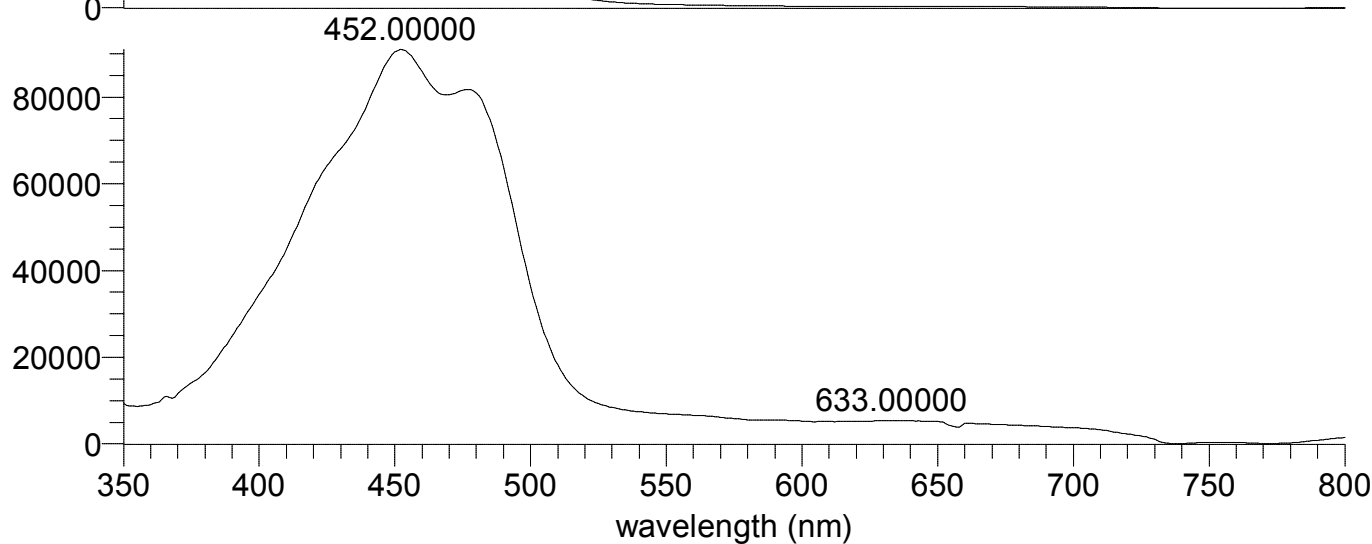NL:  
9.09E4  
130#13039  
RT: 43.46  
AV: 1

Supplement: Data_Sheet_1.zip [file Muestra130_HPLC-UV-Vis.pdf › Carotenoids/Muestra130_HPLC-UV-Vis.pdf]

RT: 14.83 - 48.58

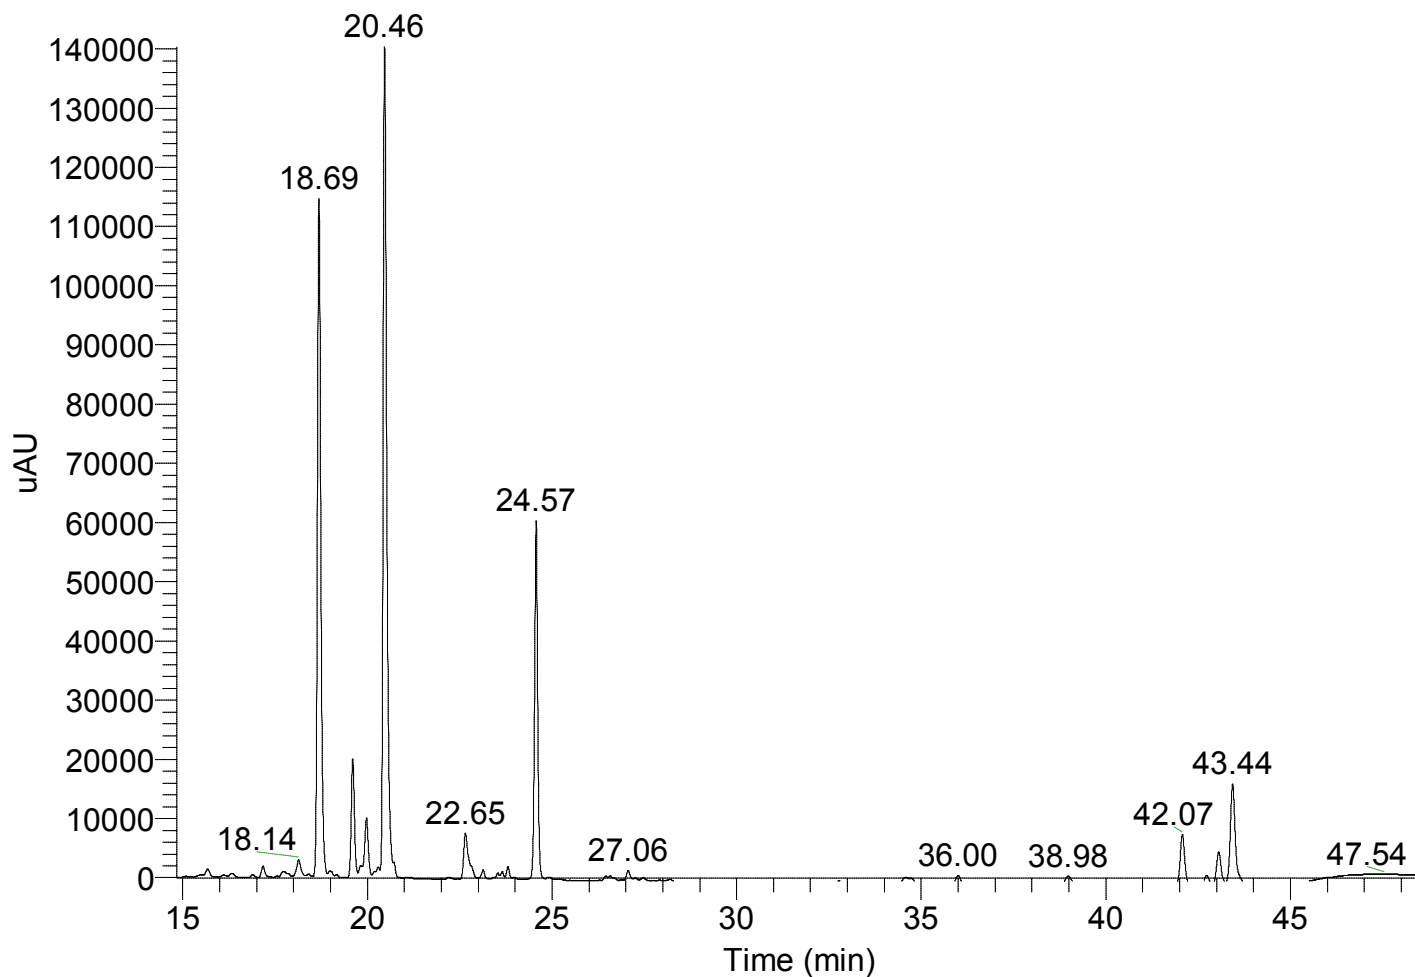

NL:  
1.40E5  
Total Scan  
PDA 131

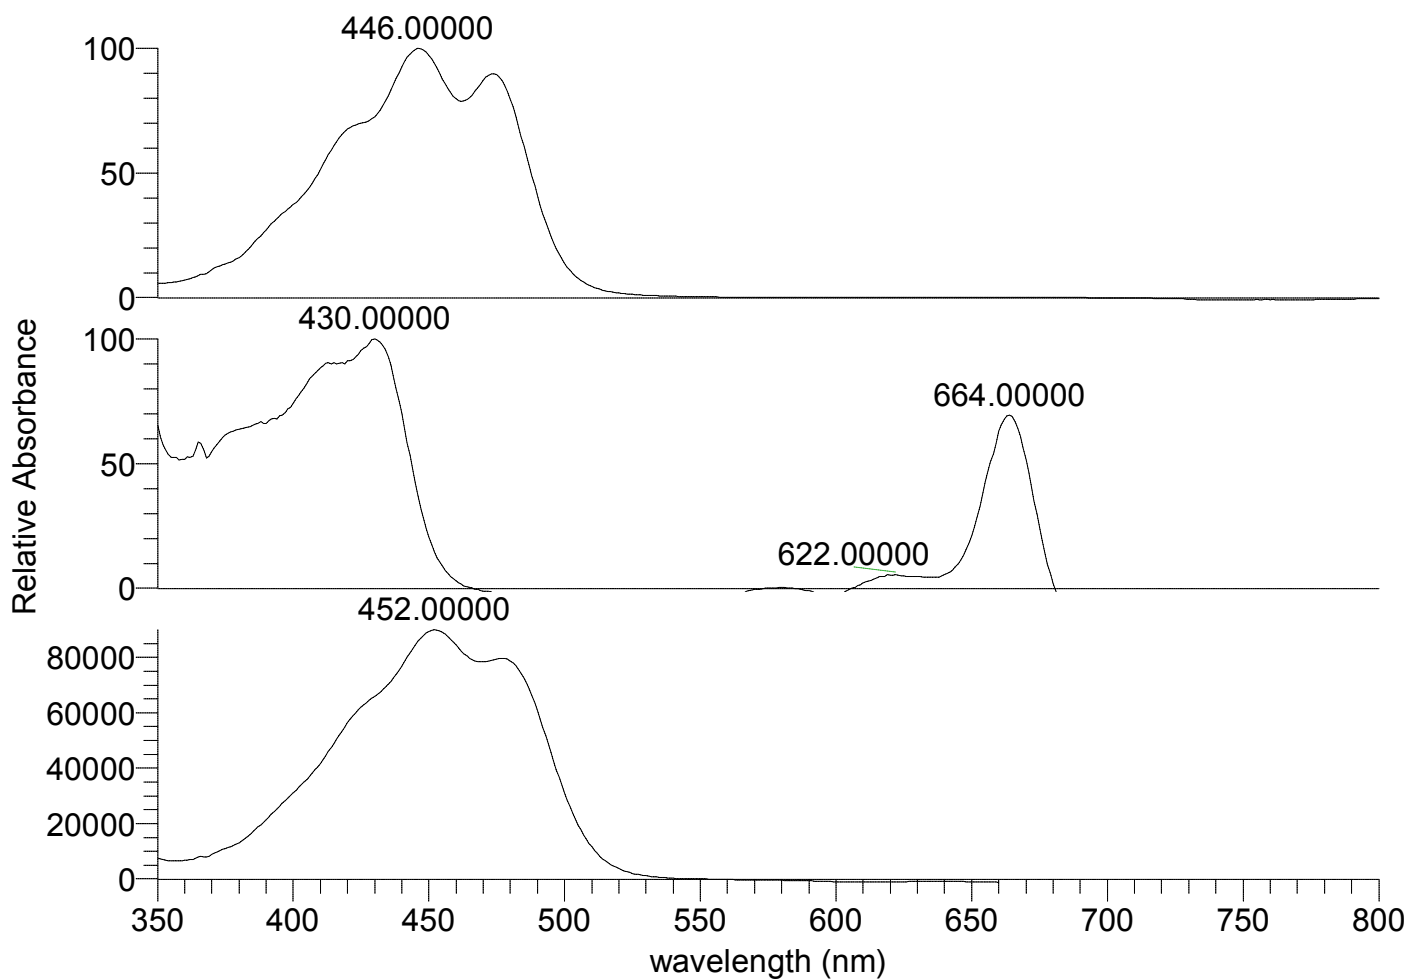

NL:  
3.47E5  
131#7371  
RT: 24.57  
AV: 1

NL:  
6.71E3  
131#10800  
RT: 36.00  
AV: 1

NL:  
8.99E4  
131#13033  
RT: 43.44  
AV: 1

Supplement: Data_Sheet_1.zip [file Muestra131_HPLC-UV.pdf › Carotenoids/Muestra131_HPLC-UV.pdf]

RT: 0.00 - 61.20

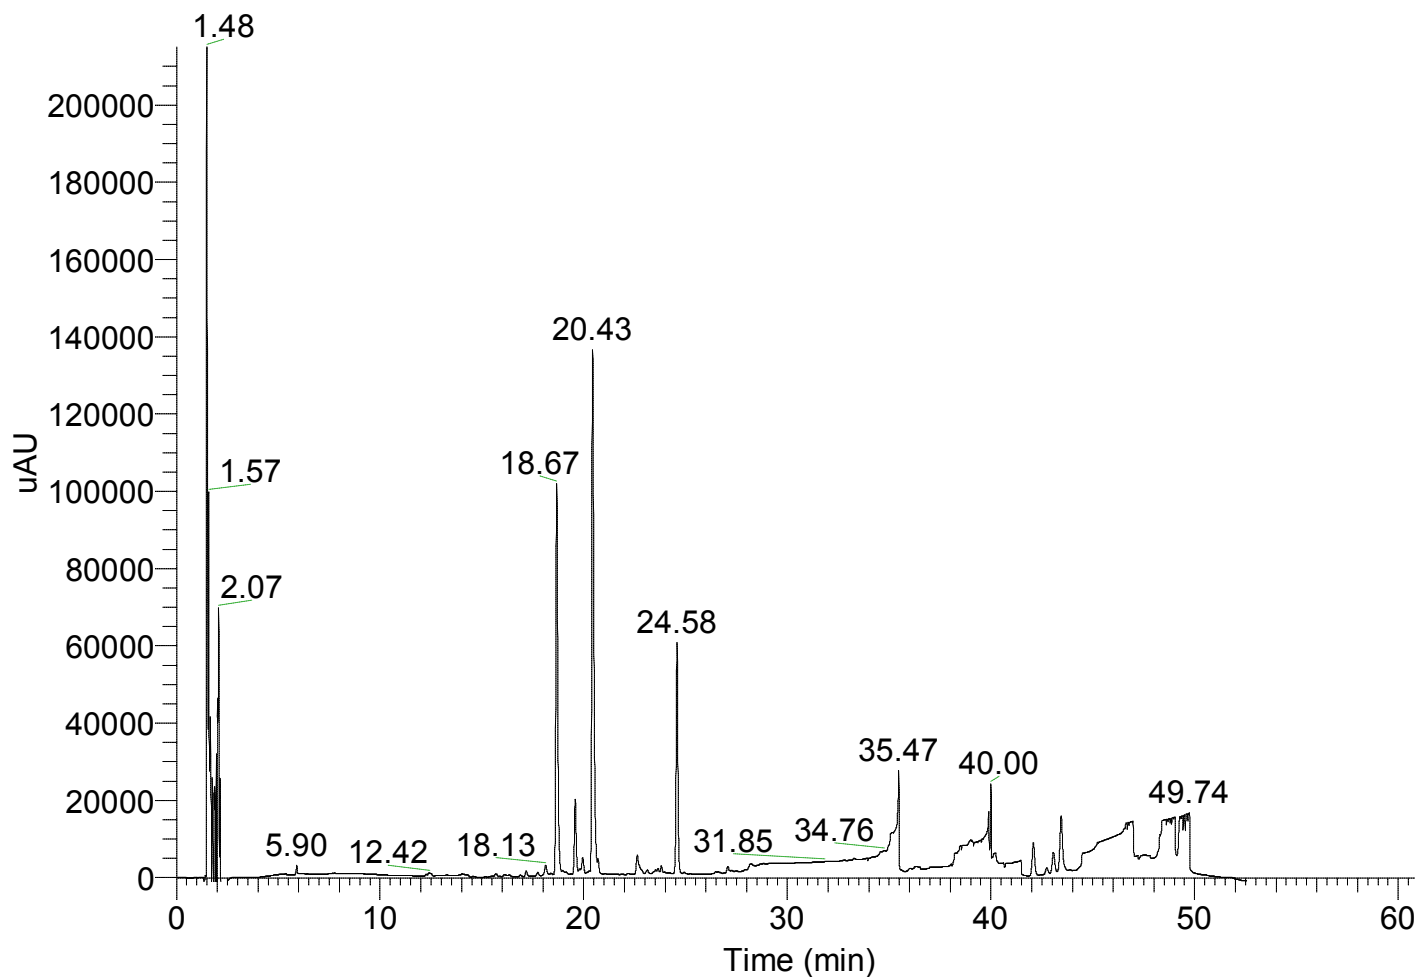

NL:  
2.15E5  
Total Scan  
PDA 132

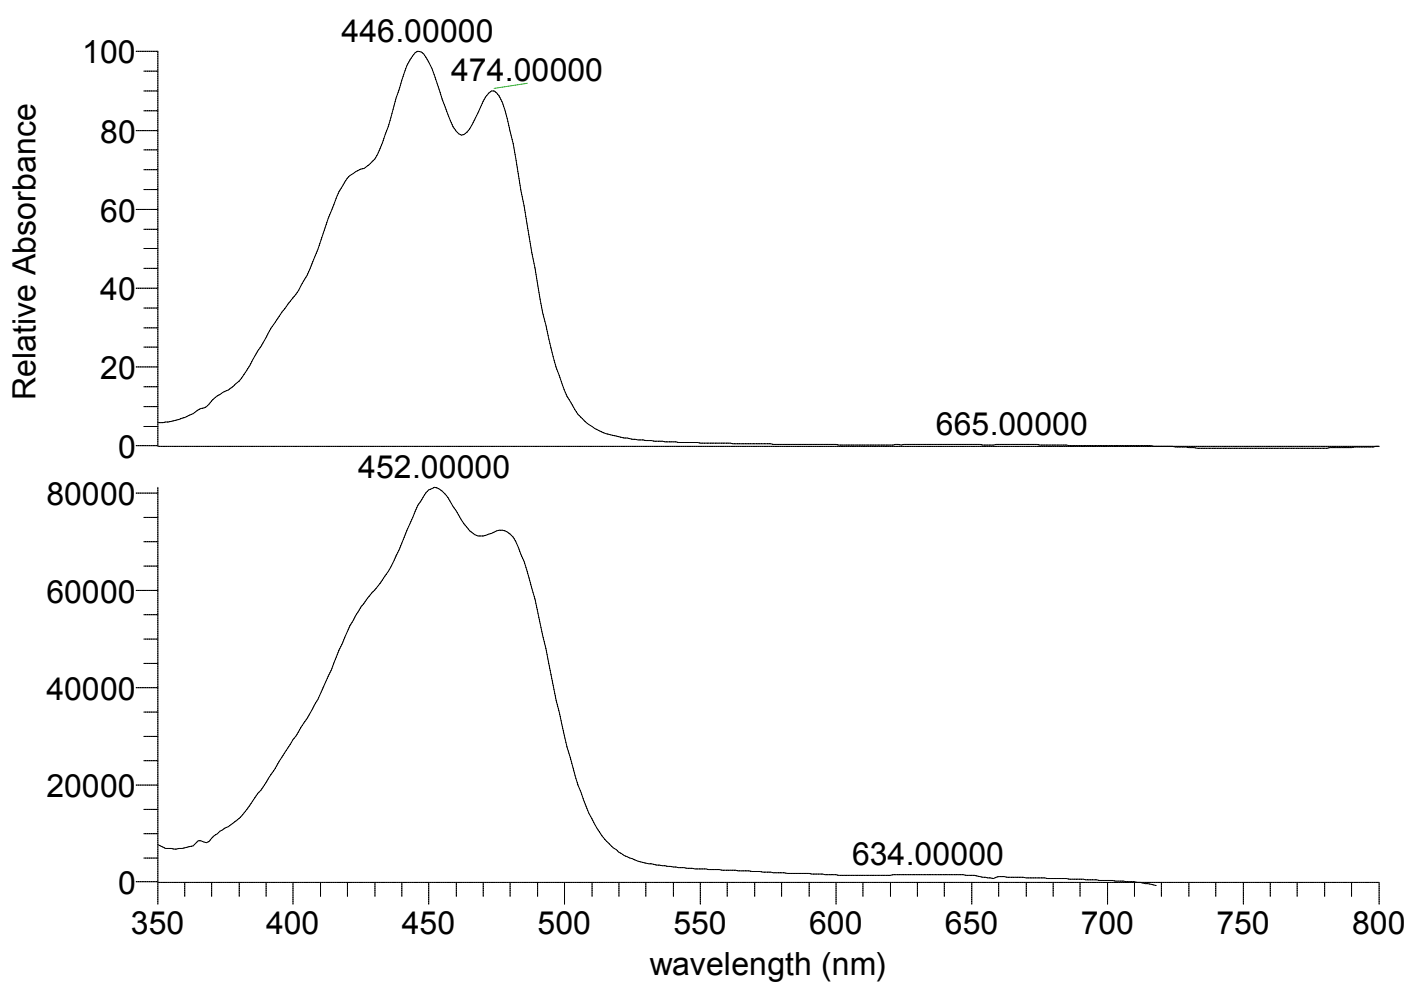

NL:  
3.44E5  
132#7374  
RT: 24.58  
AV: 1

NL:  
8.11E4  
132#13033  
RT: 43.44  
AV: 1

Supplement: Data_Sheet_1.zip [file Muestra132_HPLC-UV-Vis.pdf › Carotenoids/Muestra132_HPLC-UV-Vis.pdf]

RT: 0.00 - 61.20

NL:  
2.07E5  
Total Scan  
PDA 133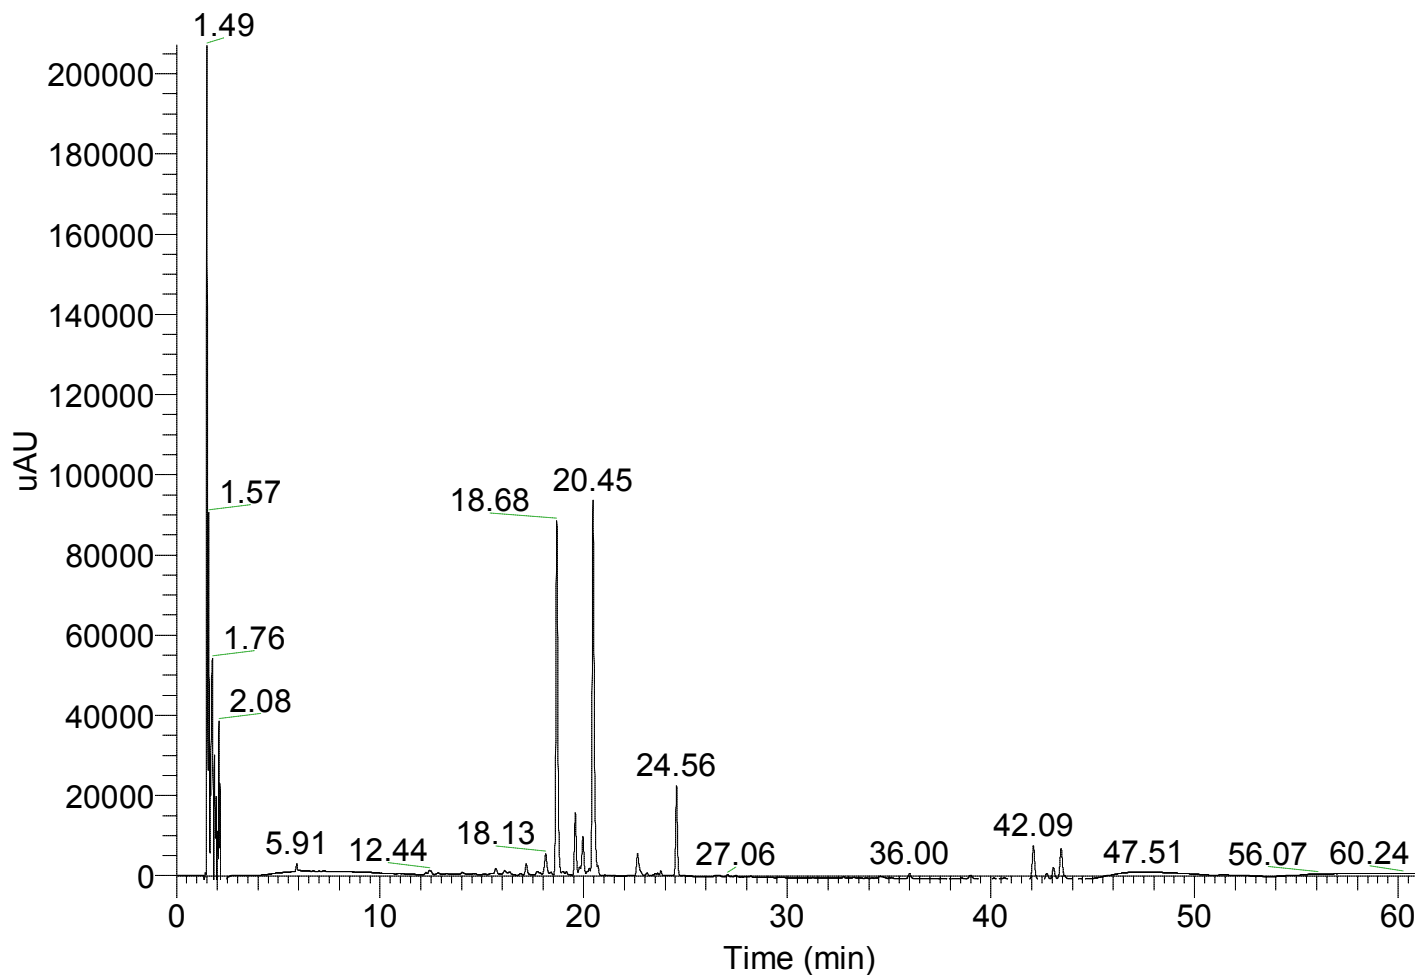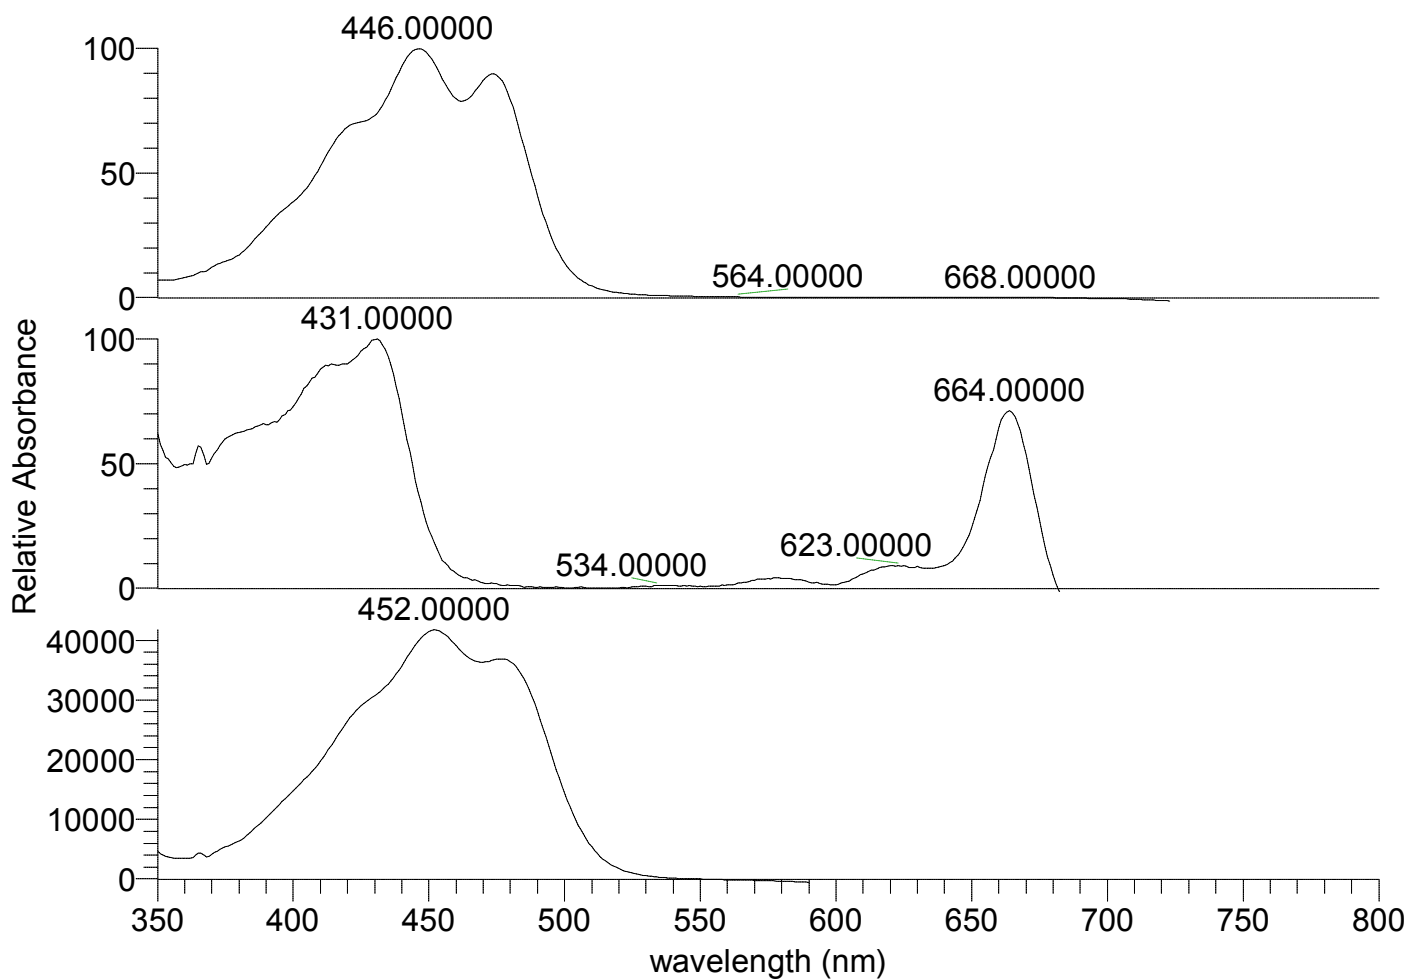NL:  
1.30E5  
133#7367  
RT: 24.56  
AV: 1NL:  
6.83E3  
133#10799  
RT: 36.00  
AV: 1NL:  
4.17E4  
133#13032  
RT: 43.44  
AV: 1

Supplement: Data_Sheet_1.zip [file Muestra133_HPLC-UV.pdf › Carotenoids/Muestra133_HPLC-UV.pdf]

RT: 0.00 - 61.20

NL:  
2.14E5  
Total Scan  
PDA 135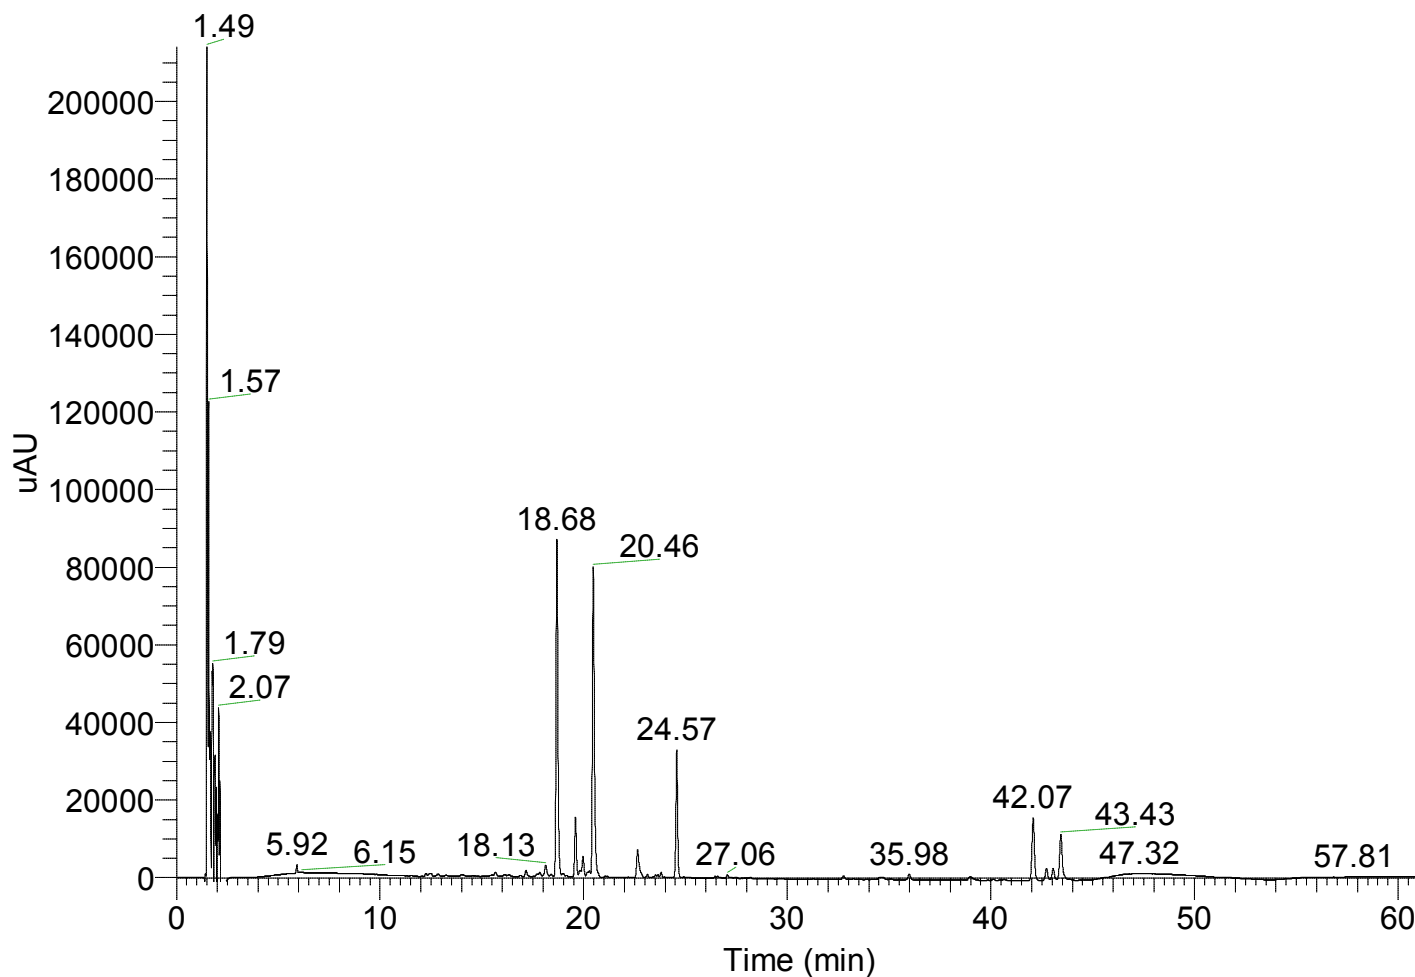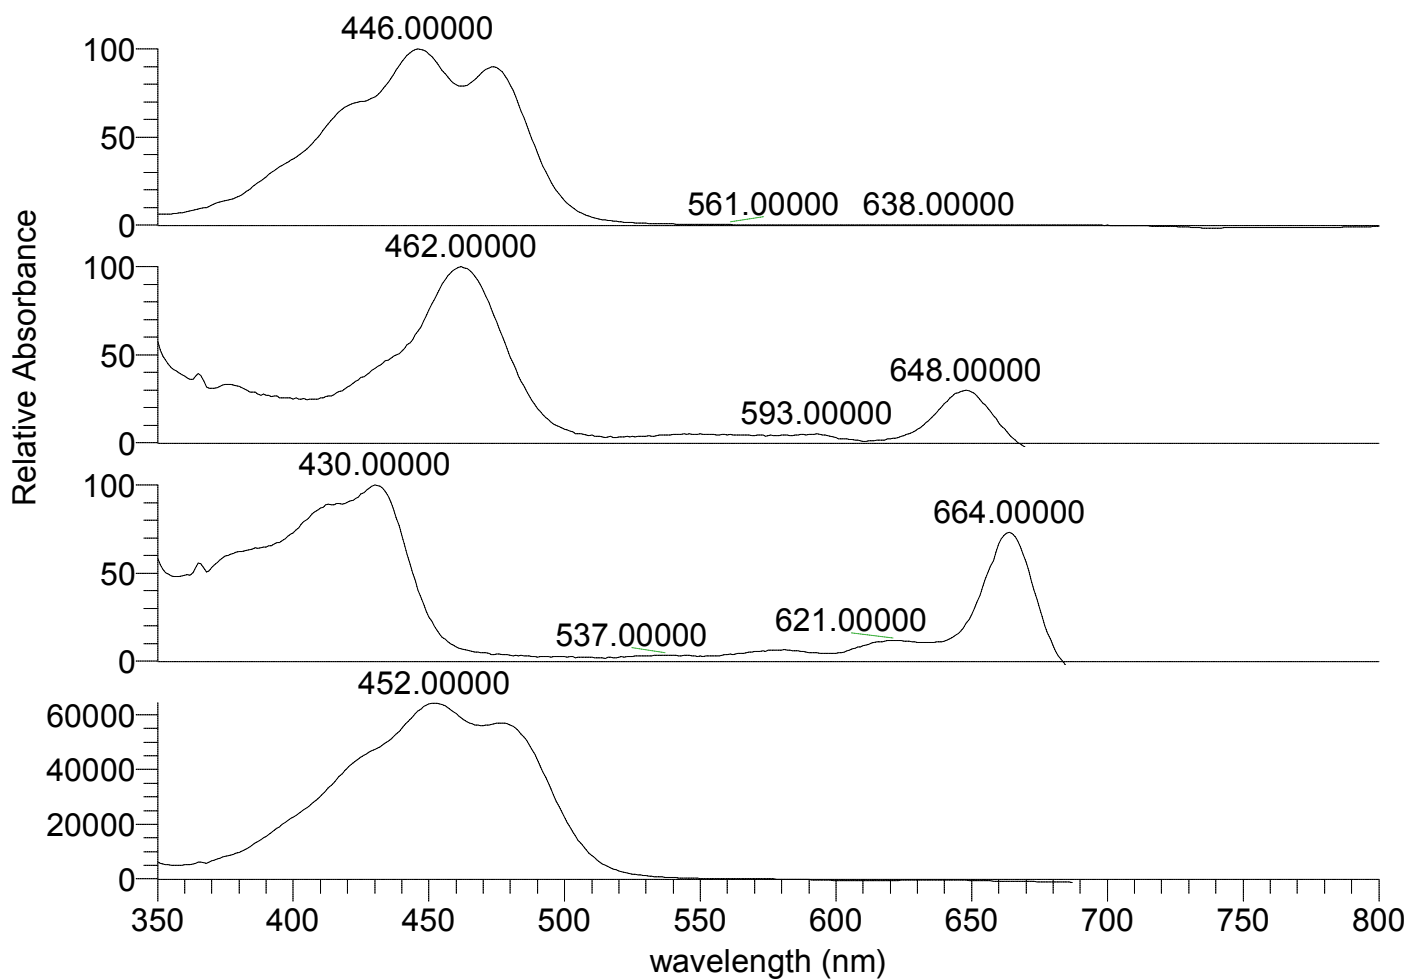

Supplement: Data_Sheet_1.zip [file Muestra135_HPLC-UV.pdf › Carotenoids/Muestra135_HPLC-UV.pdf]

RT: 0.00 - 61.20

NL:  
2.14E5  
Total Scan  
PDA 136

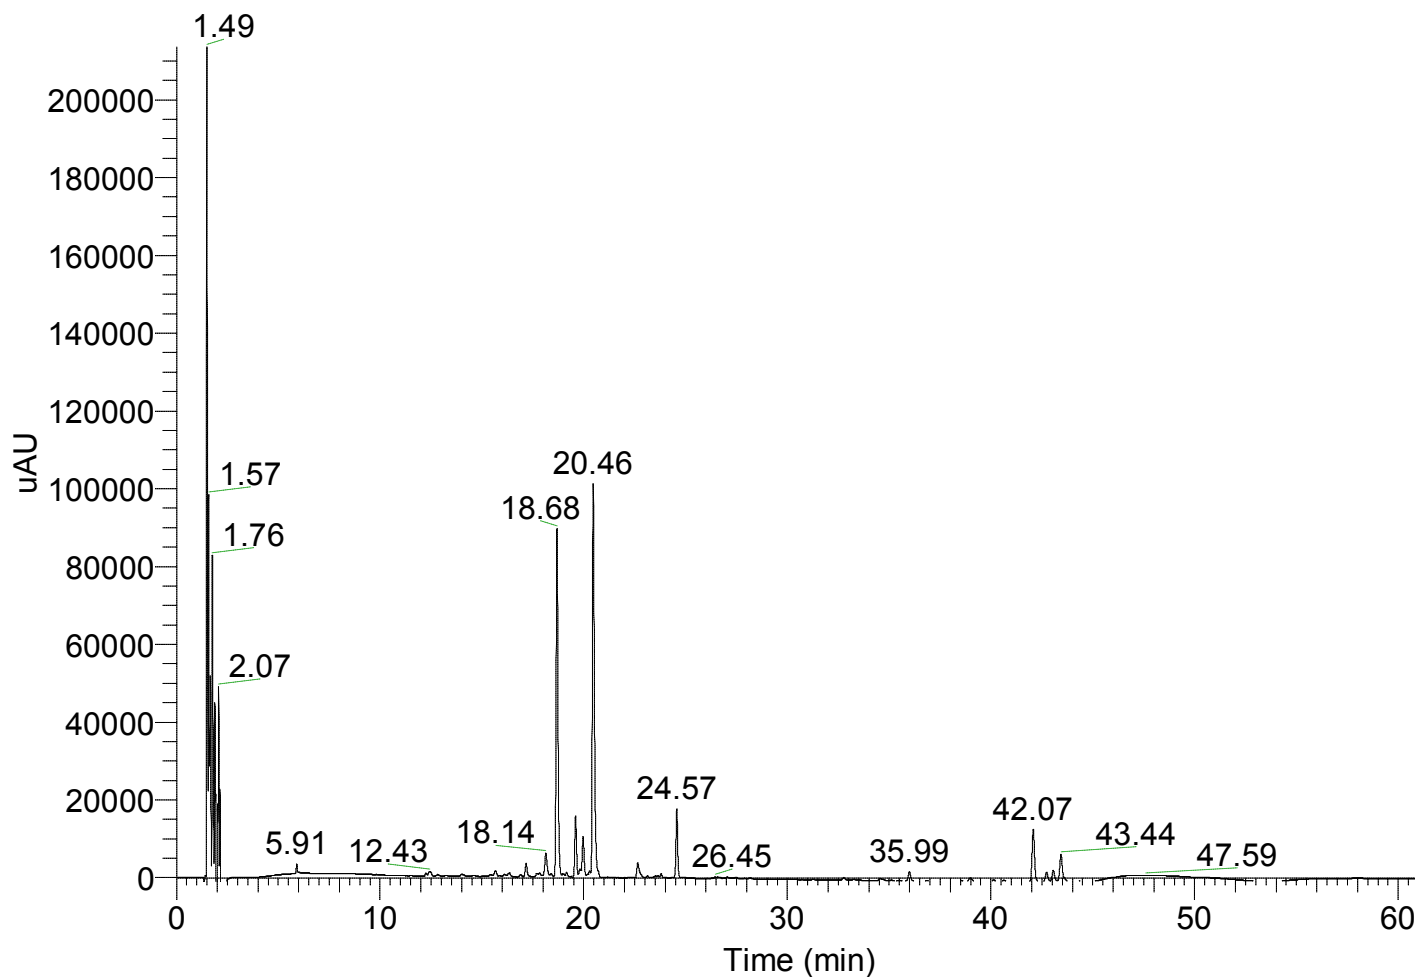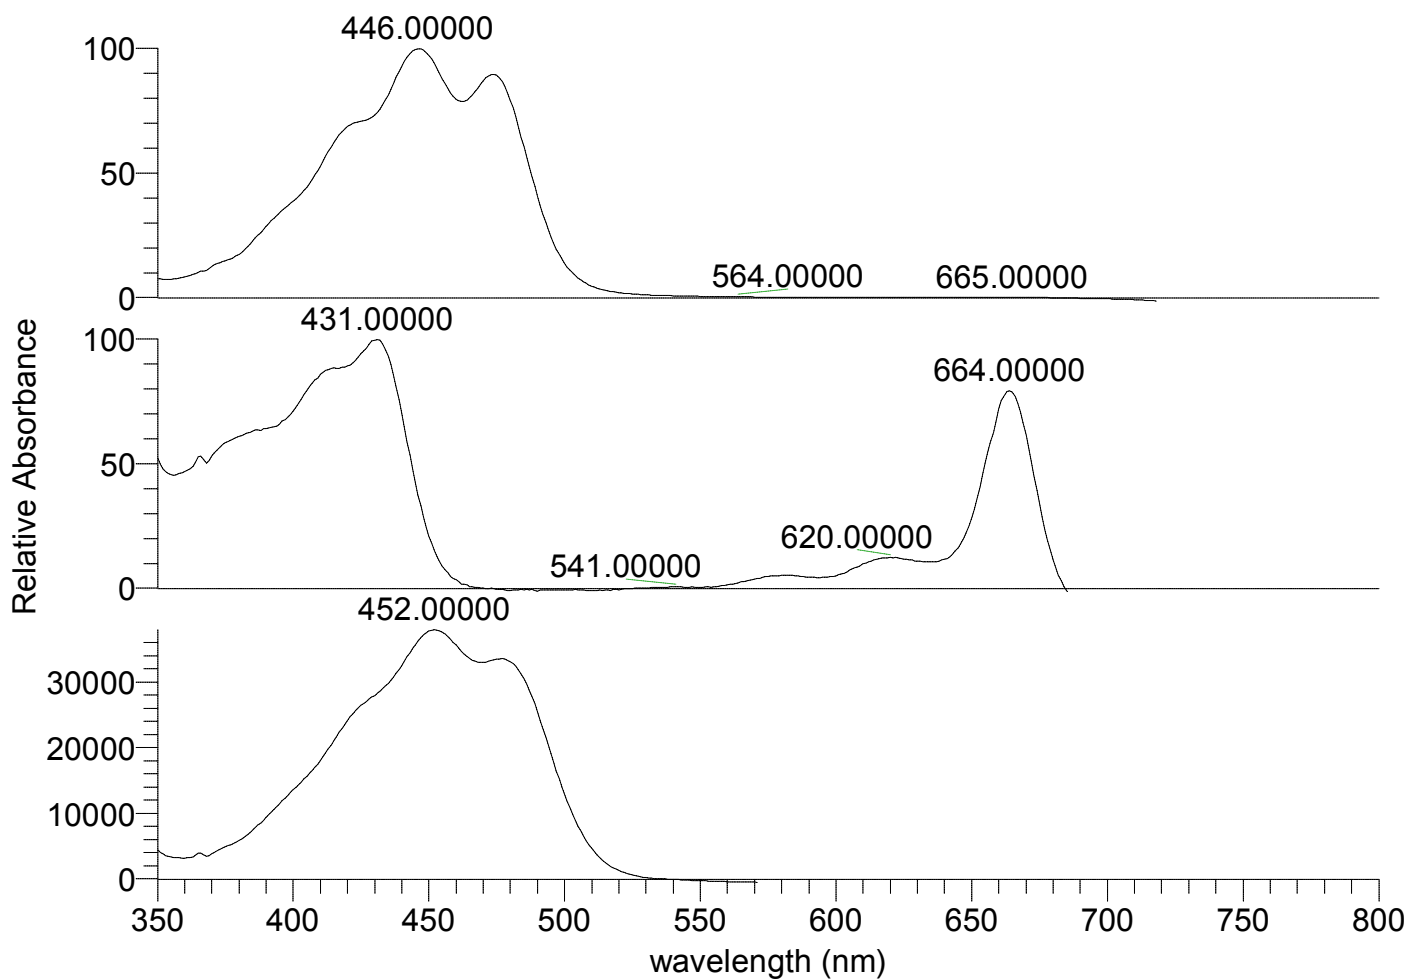

Supplement: Data_Sheet_1.zip [file Muestra136_HPLC-UV.pdf › Carotenoids/Muestra136_HPLC-UV.pdf]

RT: 13.96 - 45.58

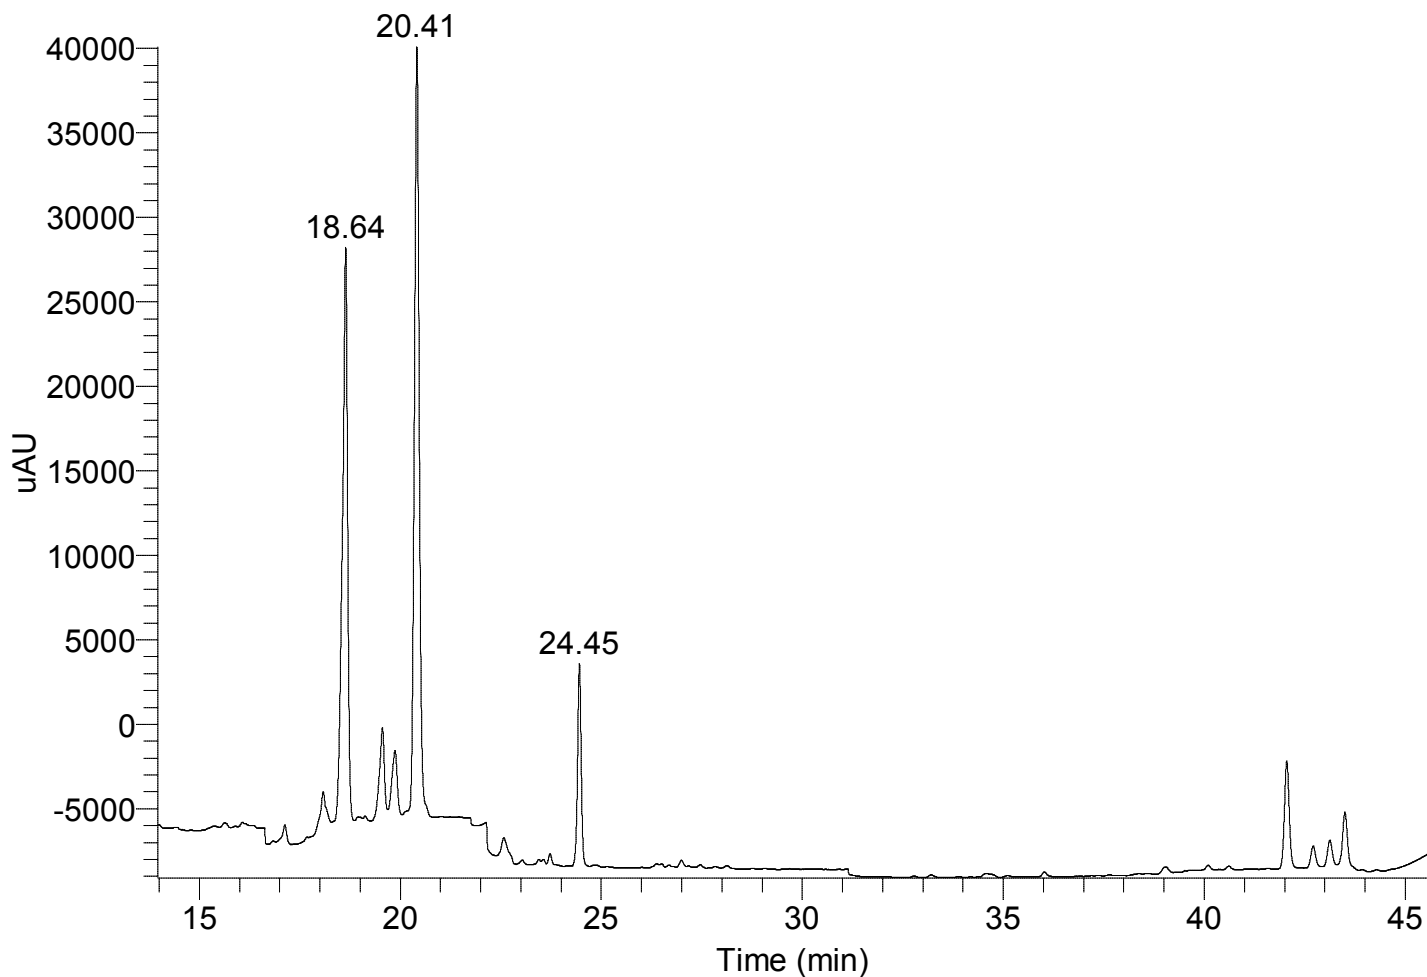

NL:  
4.01E4  
Total Scan  
PDA  
Muestra3

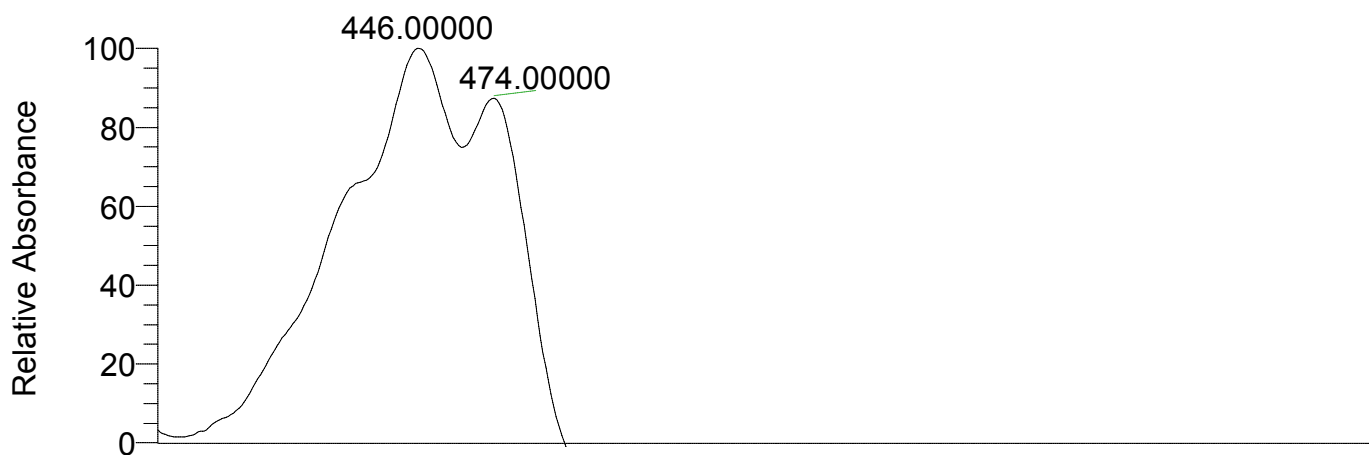

NL:  
5.93E4  
Muestra3#14  
672 RT:  
24.45 AV: 1

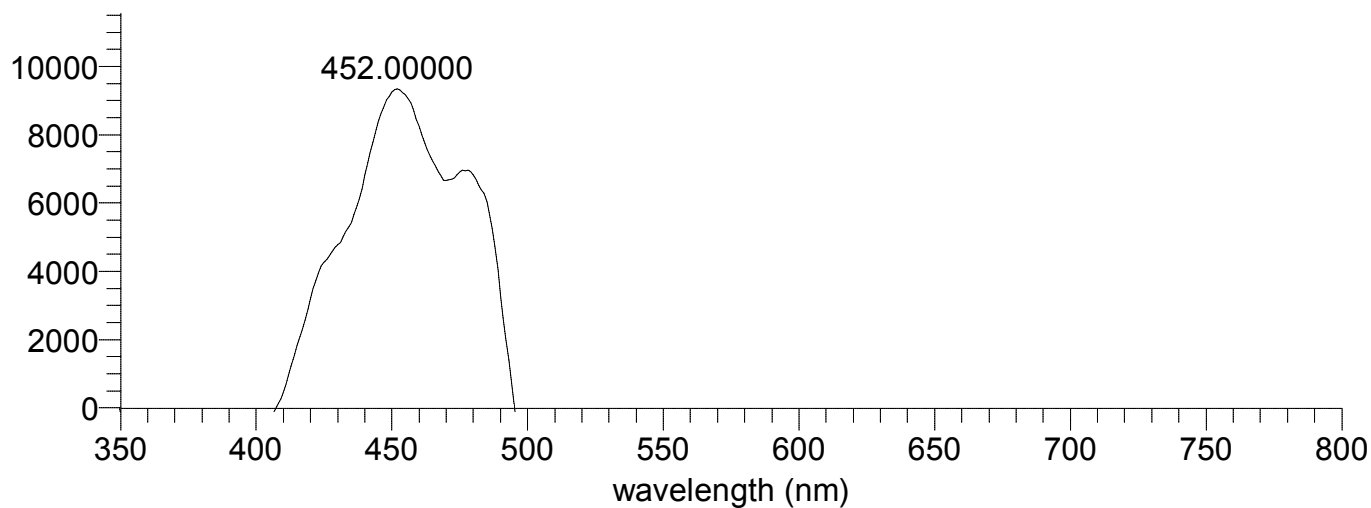

NL:  
1.15E4  
Muestra3#26  
102 RT:  
43.50 AV: 1

Supplement: Data_Sheet_1.zip [file Muestra137_HPLC-UV.pdf › Carotenoids/Muestra137_HPLC-UV.pdf]

RT: 13.49 - 49.53

NL:  
1.58E5  
Total Scan  
PDA 138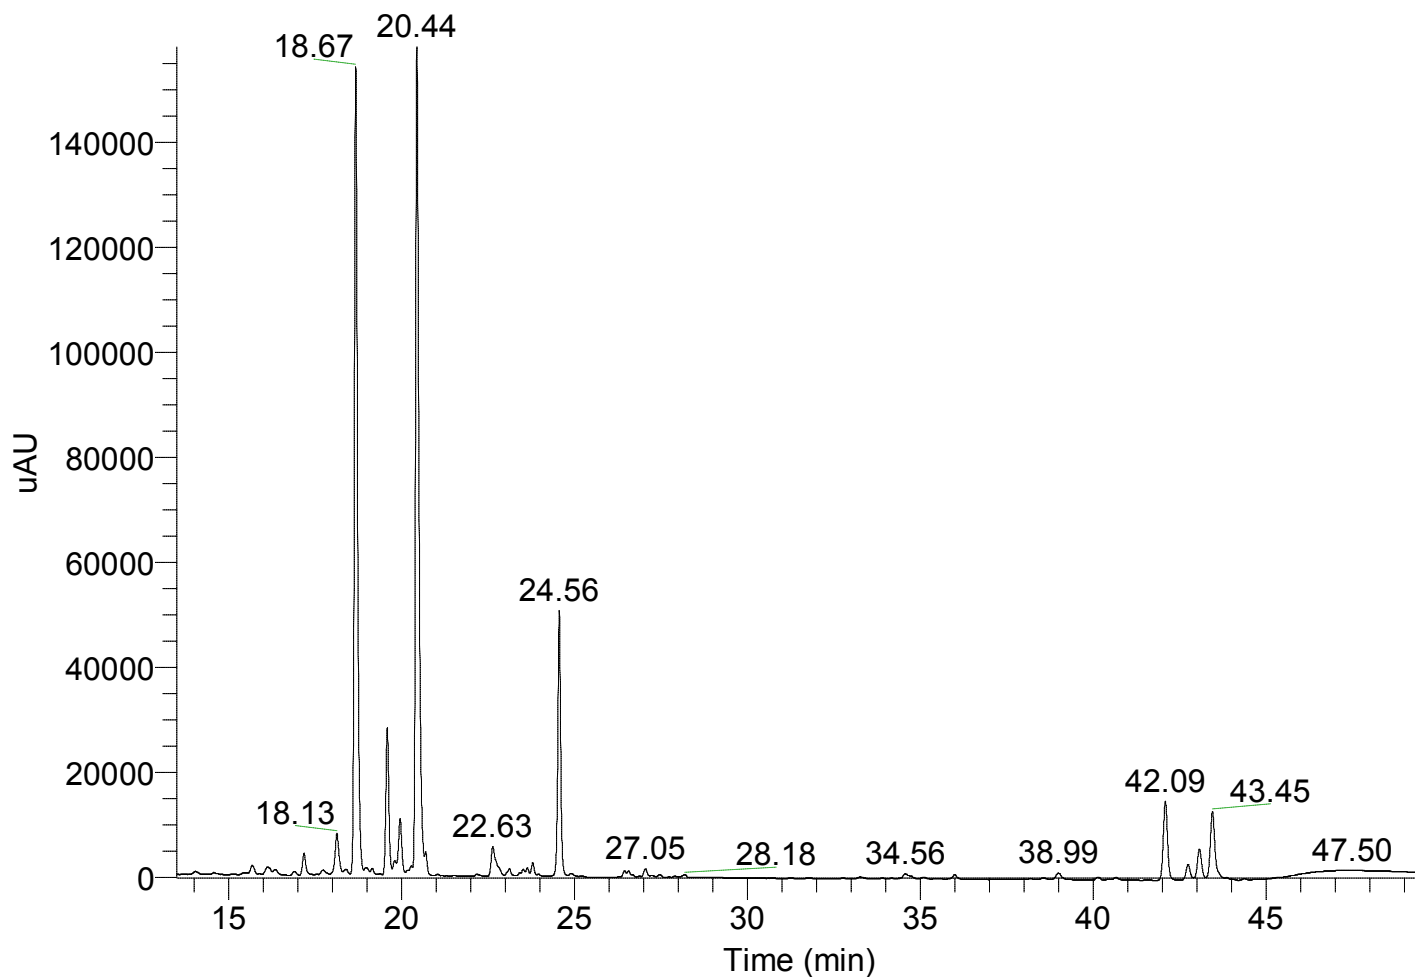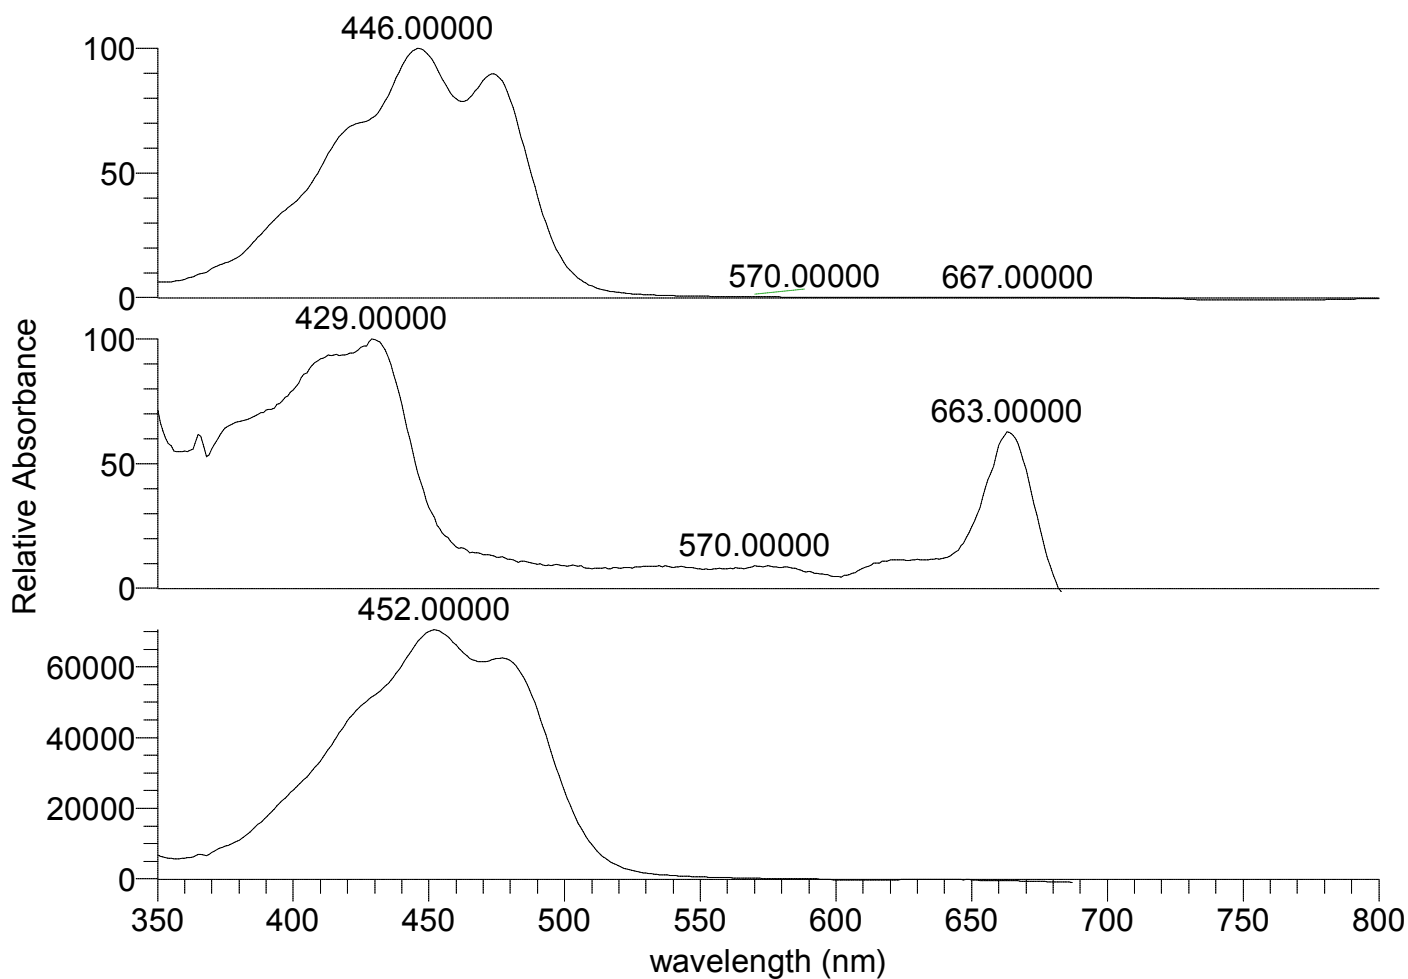NL:  
2.88E5  
138#7368  
RT: 24.56  
AV: 1NL:  
5.48E3  
138#10798  
RT: 35.99  
AV: 1NL:  
7.05E4  
138#13035  
RT: 43.45  
AV: 1

Supplement: Data_Sheet_1.zip [file Muestra138_HPLC-UV.pdf › Carotenoids/Muestra138_HPLC-UV.pdf]

RT: 0.00 - 61.20

NL:  
2.08E5  
Total Scan  
PDA 139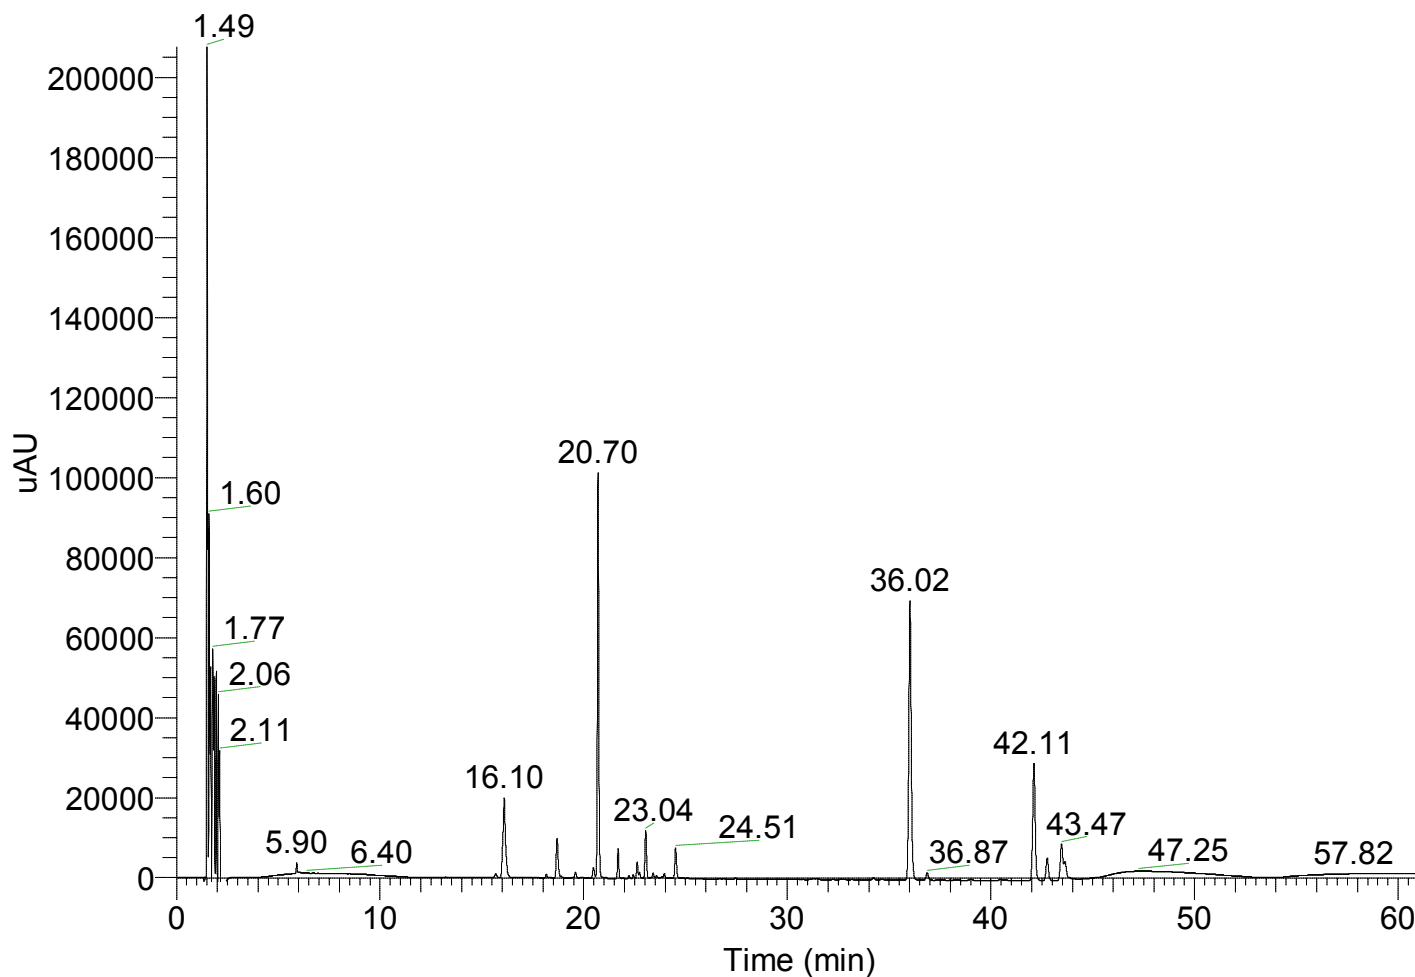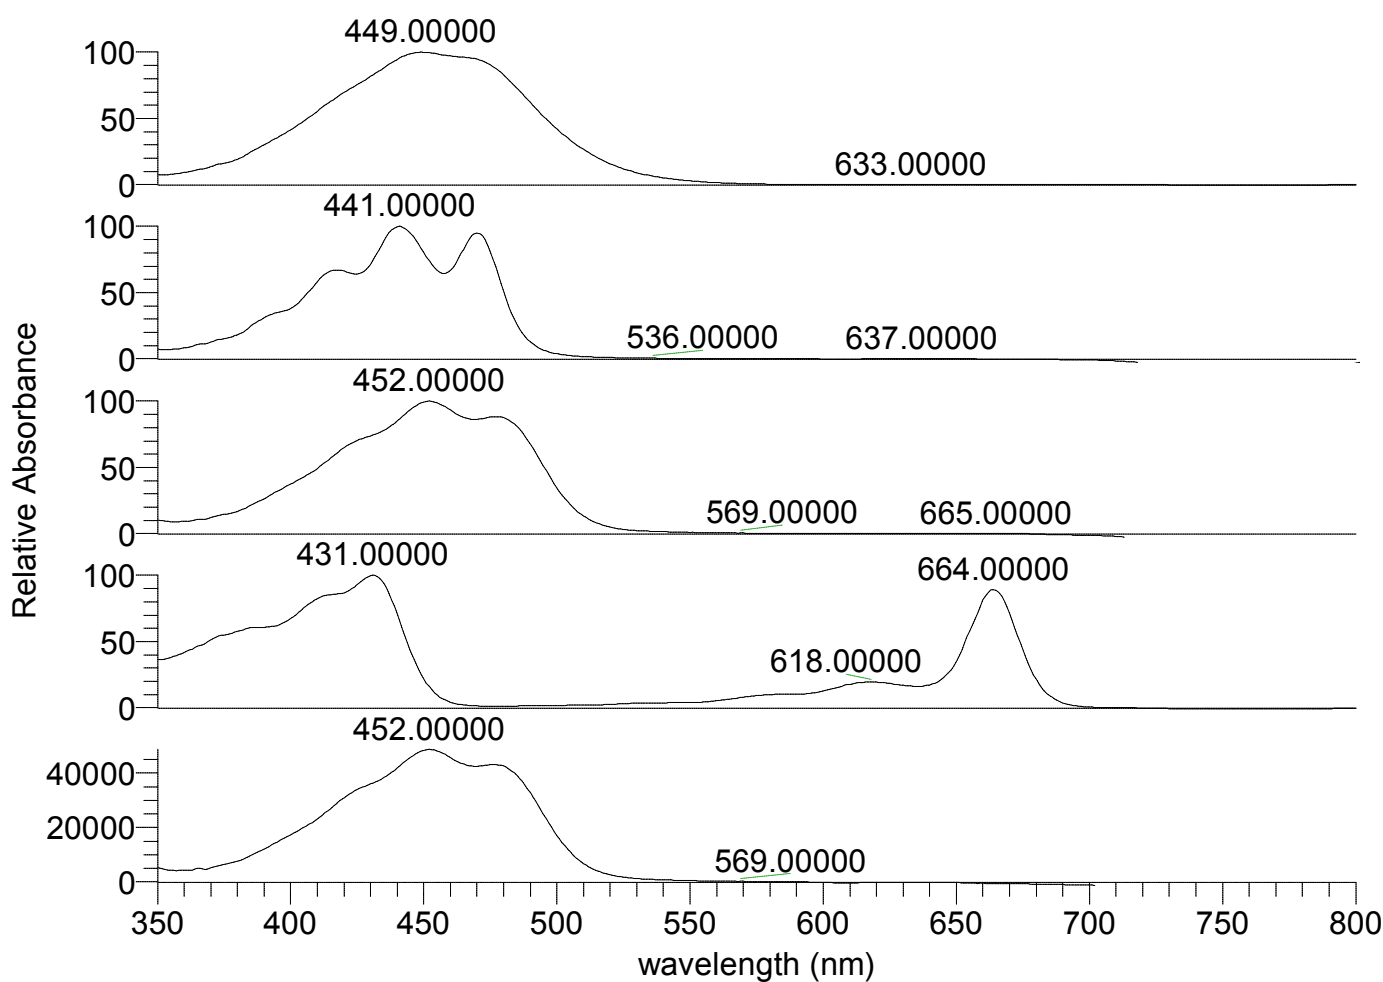

NL:  
4.40E5  
139#6207  
RT: 20.69  
AV: 1

NL:  
4.83E4  
139#6507  
RT: 21.69  
AV: 1

NL:  
4.17E4  
139#7354  
RT: 24.51  
AV: 1

NL:  
3.09E5  
139#10806  
RT: 36.02  
AV: 1

NL:  
4.87E4  
139#13041  
RT: 43.47  
AV: 1

Supplement: Data_Sheet_1.zip [file Muestra139_HPLC-UV.pdf › Carotenoids/Muestra139_HPLC-UV.pdf]

RT: 0.00 - 61.20

NL:  
2.12E5  
Total Scan  
PDA 13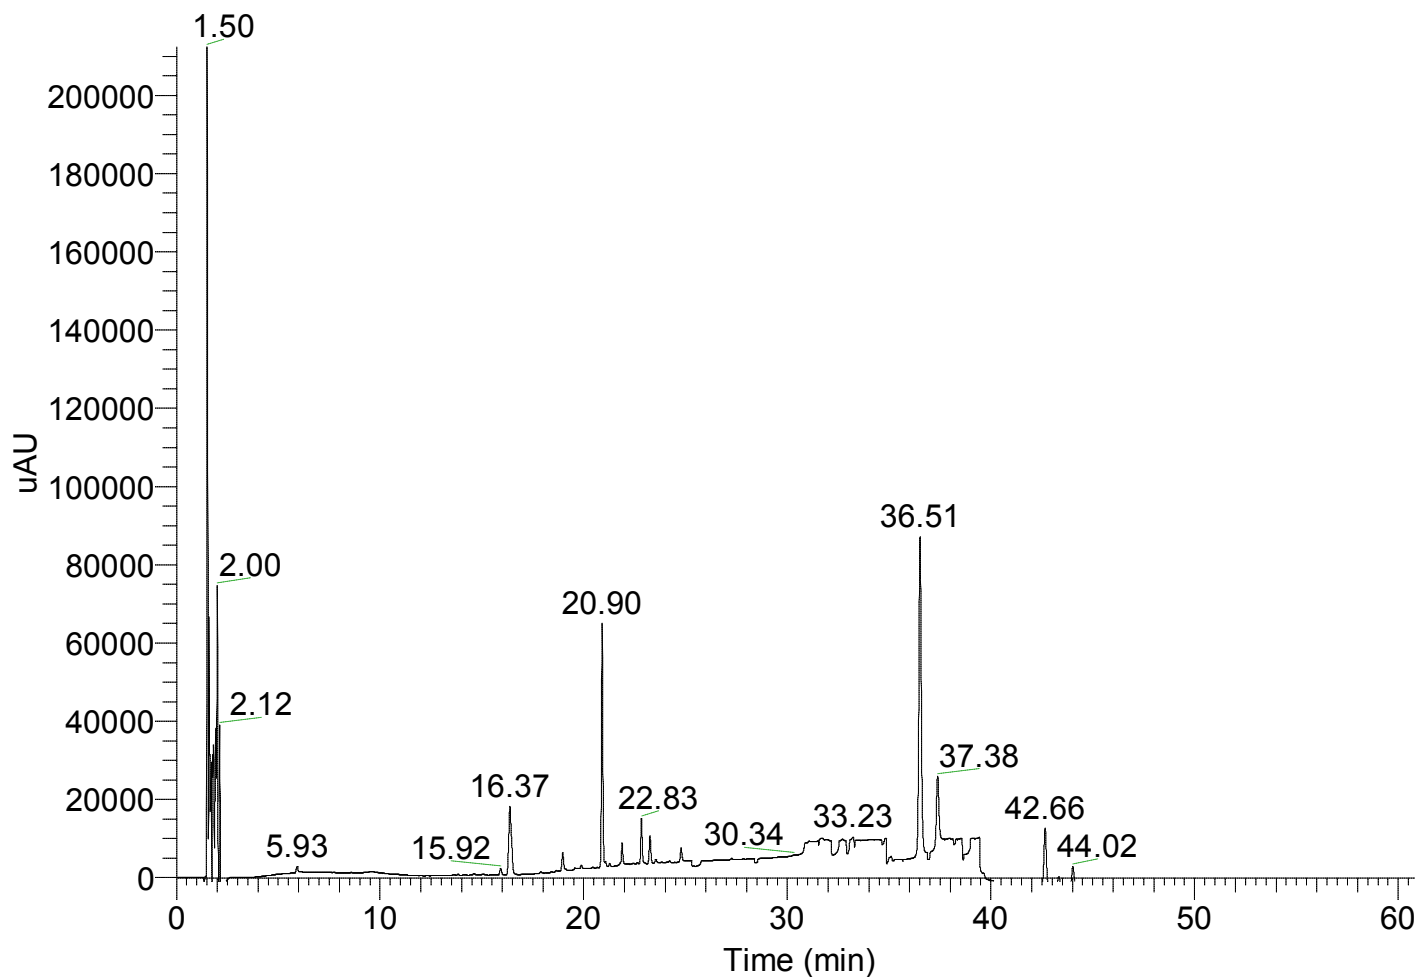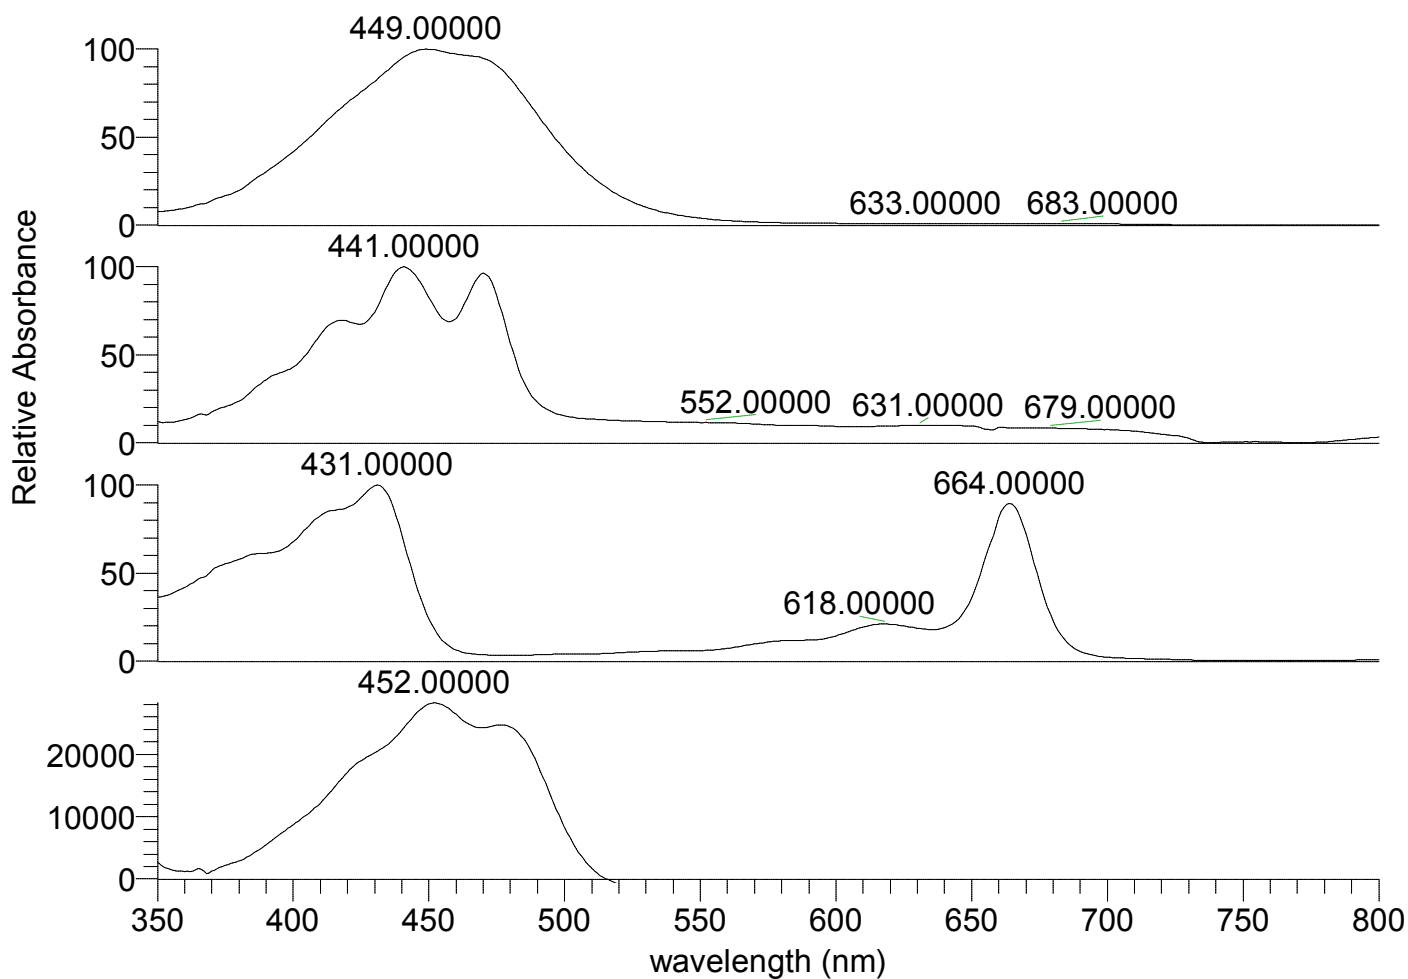NL:  
2.97E5  
13#6270  
RT: 20.90  
AV: 1NL:  
3.94E4  
13#6566  
RT: 21.89  
AV: 1NL:  
3.63E5  
13#10953  
RT: 36.51  
AV: 1NL:  
2.82E4  
13#13207  
RT: 44.02  
AV: 1

Supplement: Data_Sheet_1.zip [file Muestra13_HPLC-UV.pdf › Carotenoids/Muestra13_HPLC-UV.pdf]

RT: 0.00 - 61.20

NL:  
2.11E5  
Total Scan  
PDA 140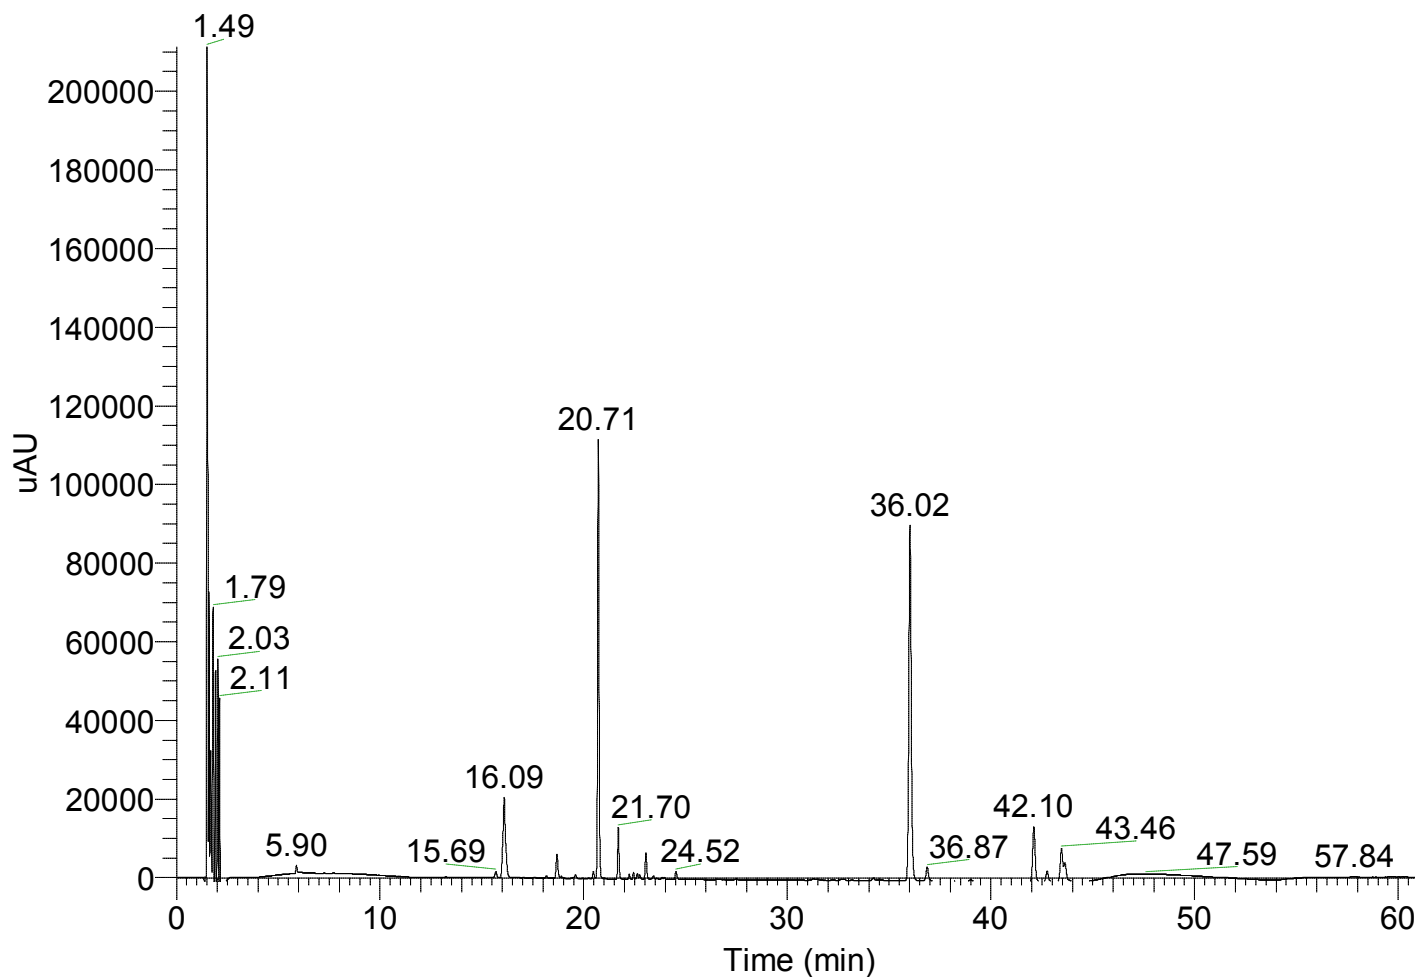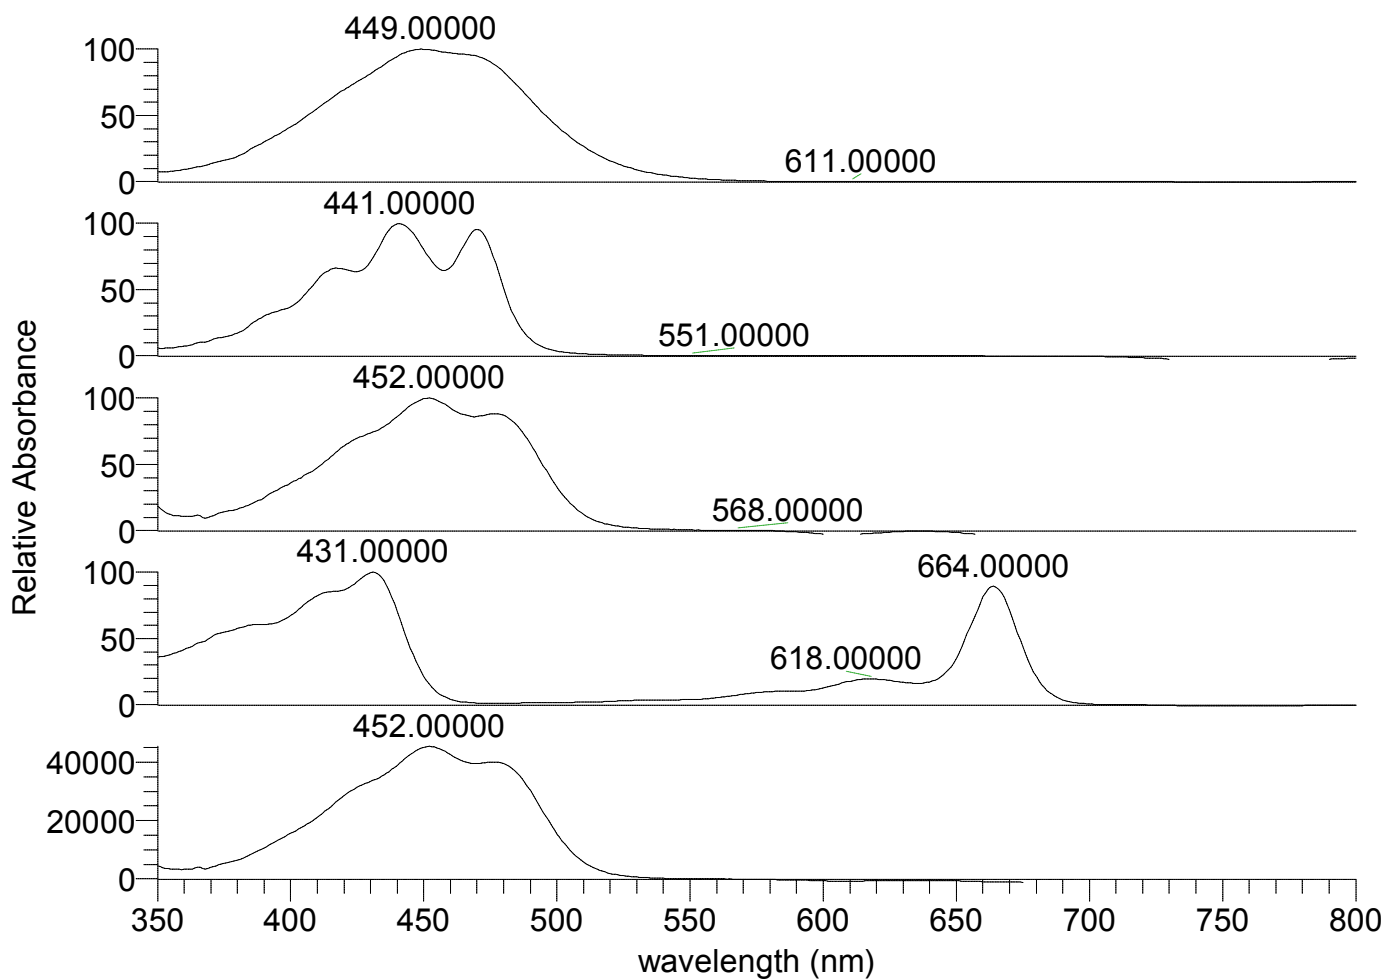

NL:  
5.26E5  
140#6214  
RT: 20.71  
AV: 1

NL:  
8.43E4  
140#6509  
RT: 21.70  
AV: 1

NL:  
1.19E4  
140#7359  
RT: 24.53  
AV: 1

NL:  
4.00E5  
140#10806  
RT: 36.02  
AV: 1

NL:  
4.54E4  
140#13039  
RT: 43.46  
AV: 1

Supplement: Data_Sheet_1.zip [file Muestra140_HPLC-UV-Vis.pdf › Carotenoids/Muestra140_HPLC-UV-Vis.pdf]

RT: 0.00 - 61.20

NL:  
2.14E5  
Total Scan  
PDA 142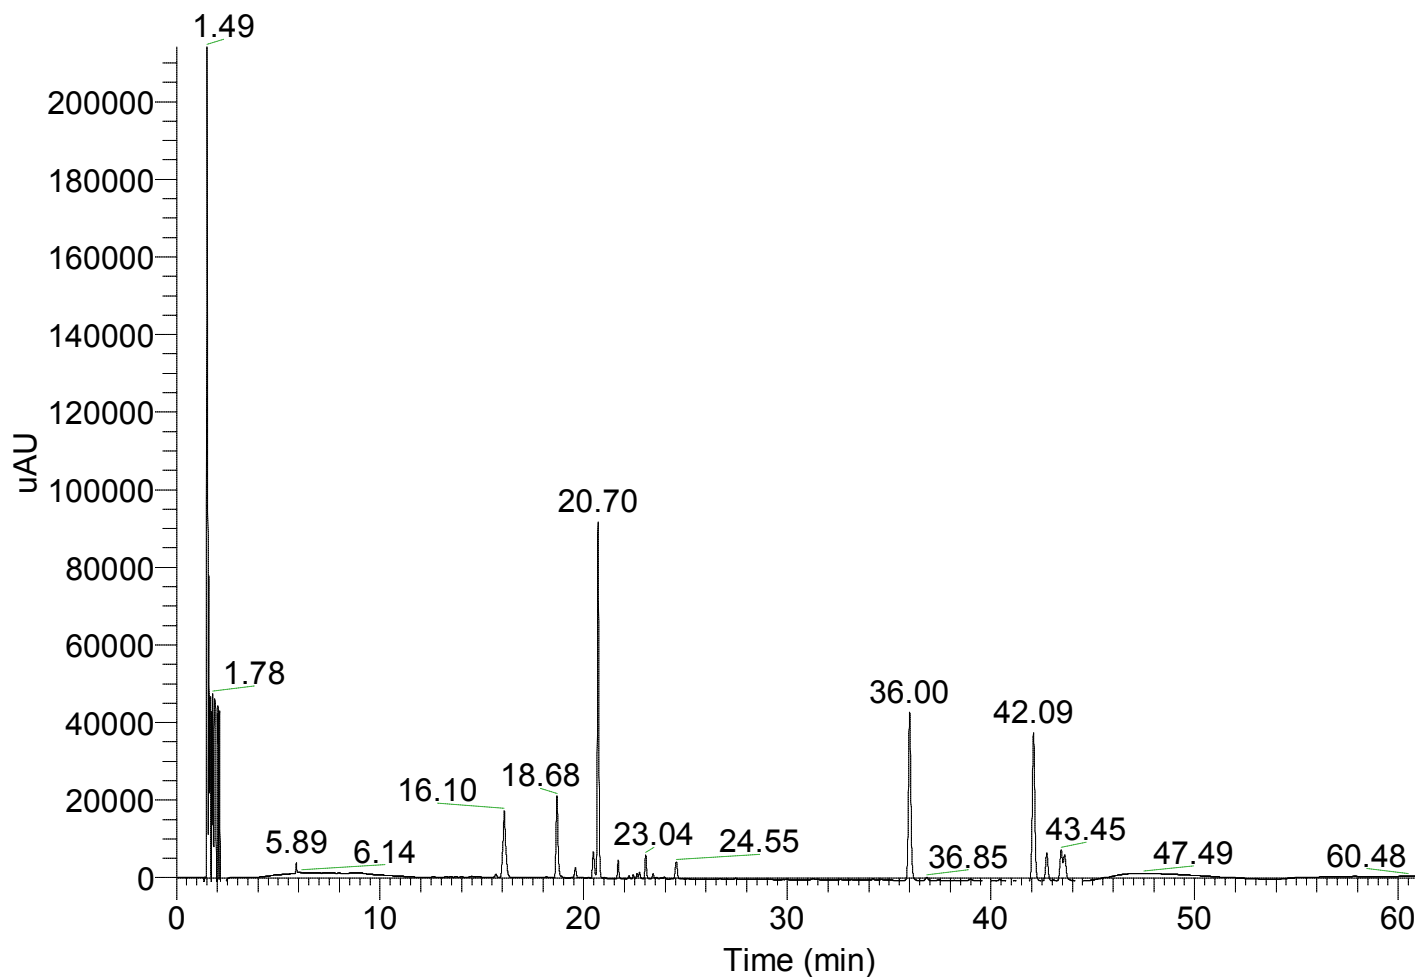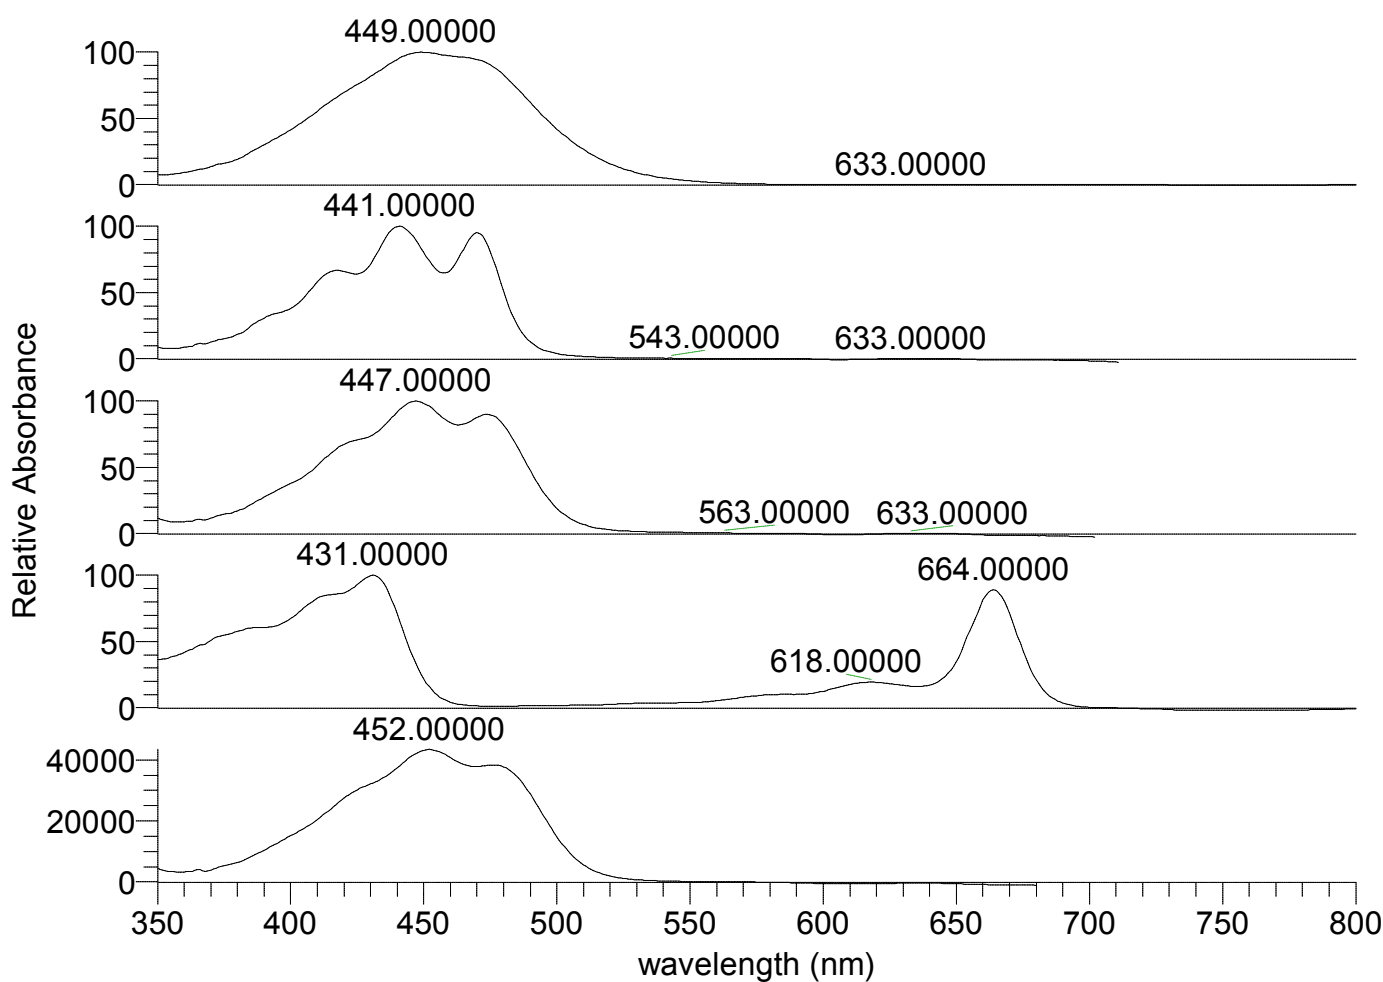

NL:  
4.33E5  
142#6211  
RT: 20.70  
AV: 1

NL:  
3.21E4  
142#6507  
RT: 21.69  
AV: 1

NL:  
2.55E4  
142#7366  
RT: 24.55  
AV: 1

NL:  
1.92E5  
142#10800  
RT: 36.00  
AV: 1

NL:  
4.34E4  
142#13036  
RT: 43.45  
AV: 1

Supplement: Data_Sheet_1.zip [file Muestra142_HPLC-UV-Vis.pdf › Carotenoids/Muestra142_HPLC-UV-Vis.pdf]

RT: 0.00 - 61.20

NL:  
2.06E5  
Total Scan  
PDA 143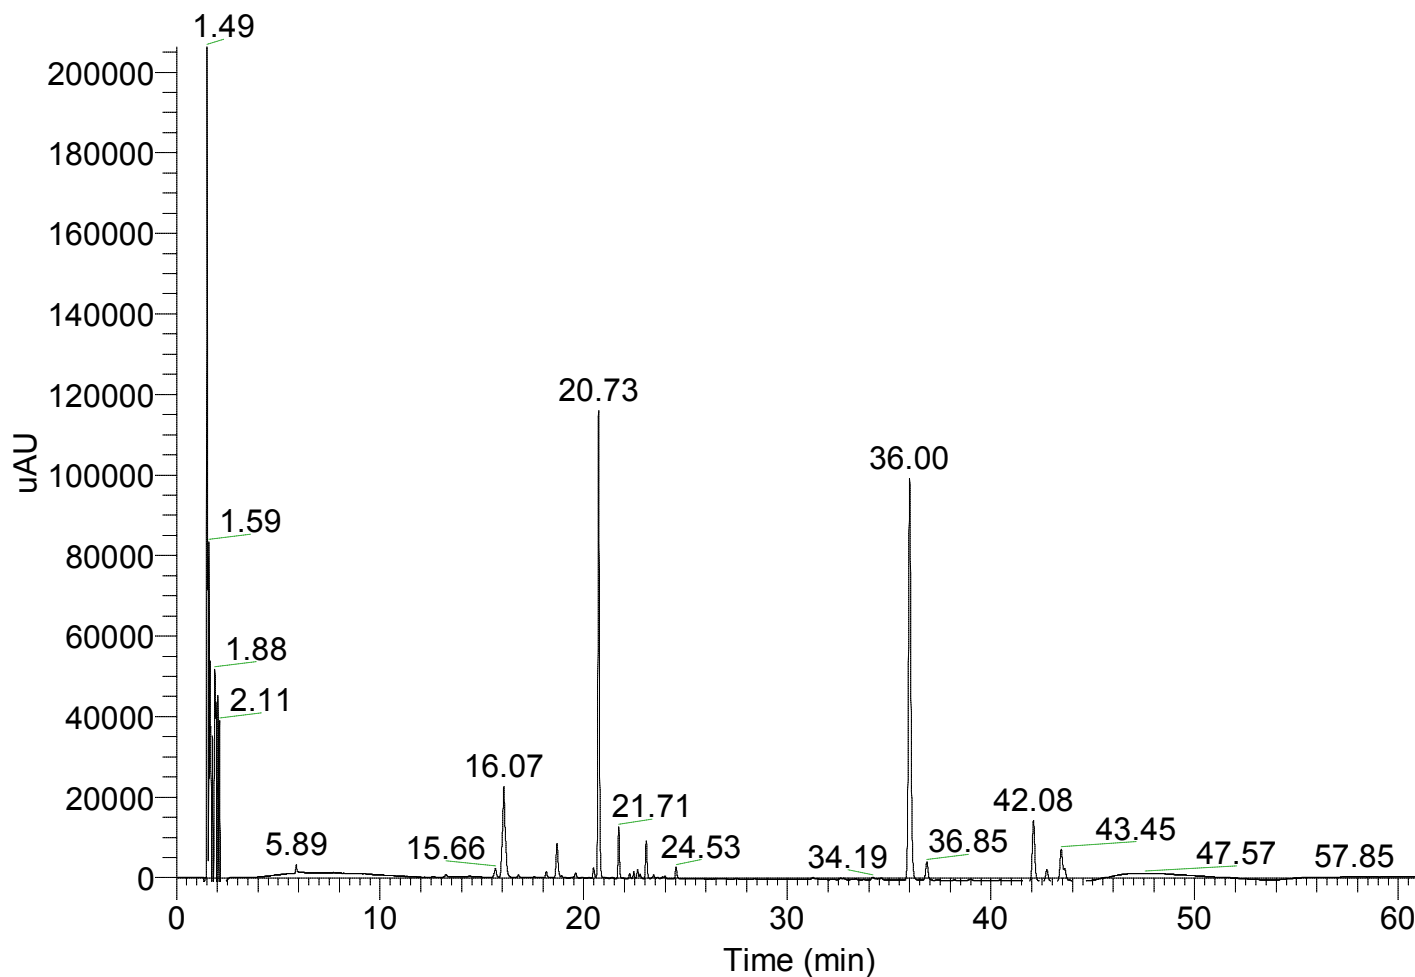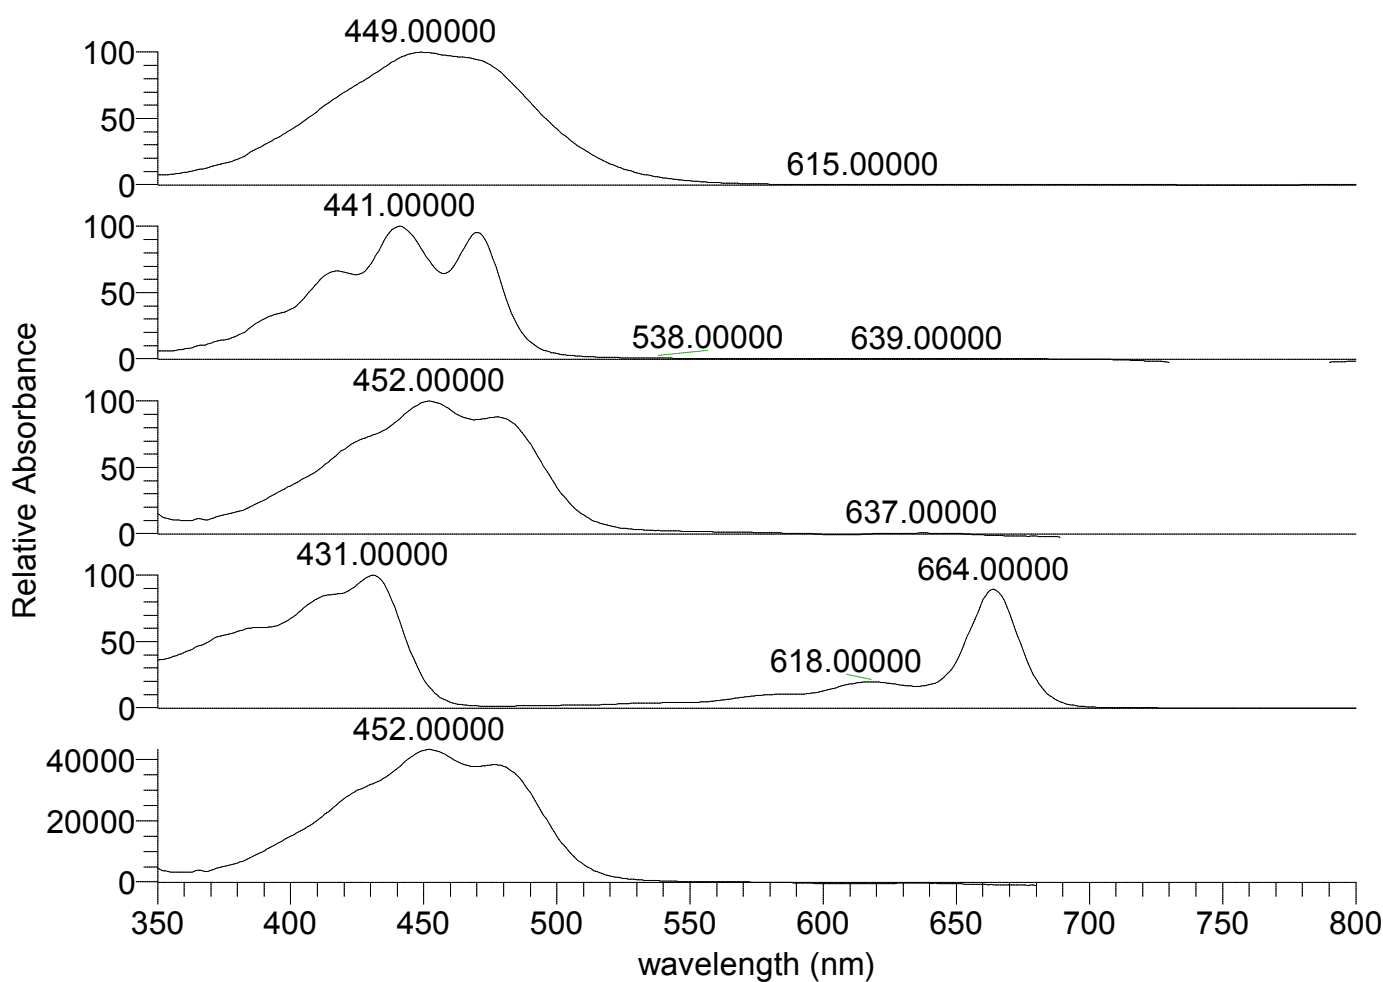

NL:  
5.45E5  
143#6219  
RT: 20.73  
AV: 1

NL:  
8.16E4  
143#6513  
RT: 21.71  
AV: 1

NL:  
1.71E4  
143#7359  
RT: 24.53  
AV: 1

NL:  
4.40E5  
143#10799  
RT: 36.00  
AV: 1

NL:  
4.32E4  
143#13035  
RT: 43.45  
AV: 1

Supplement: Data_Sheet_1.zip [file Muestra143_HPLC-UV-Vis.pdf › Carotenoids/Muestra143_HPLC-UV-Vis.pdf]

RT: 0.00 - 61.20

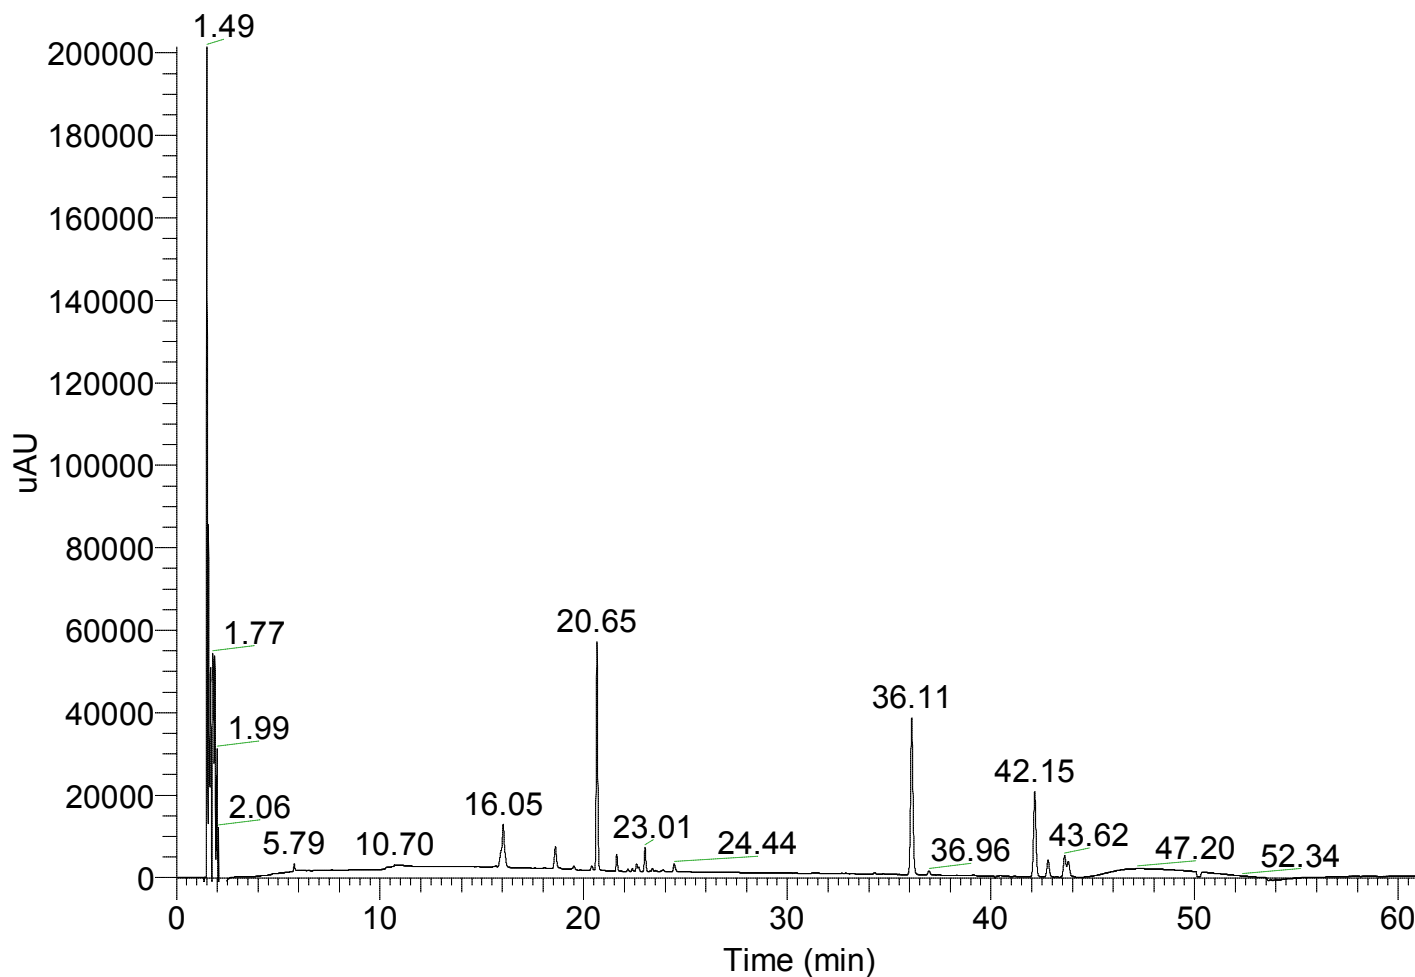

NL:  
2.01E5  
Total Scan  
PDA 144

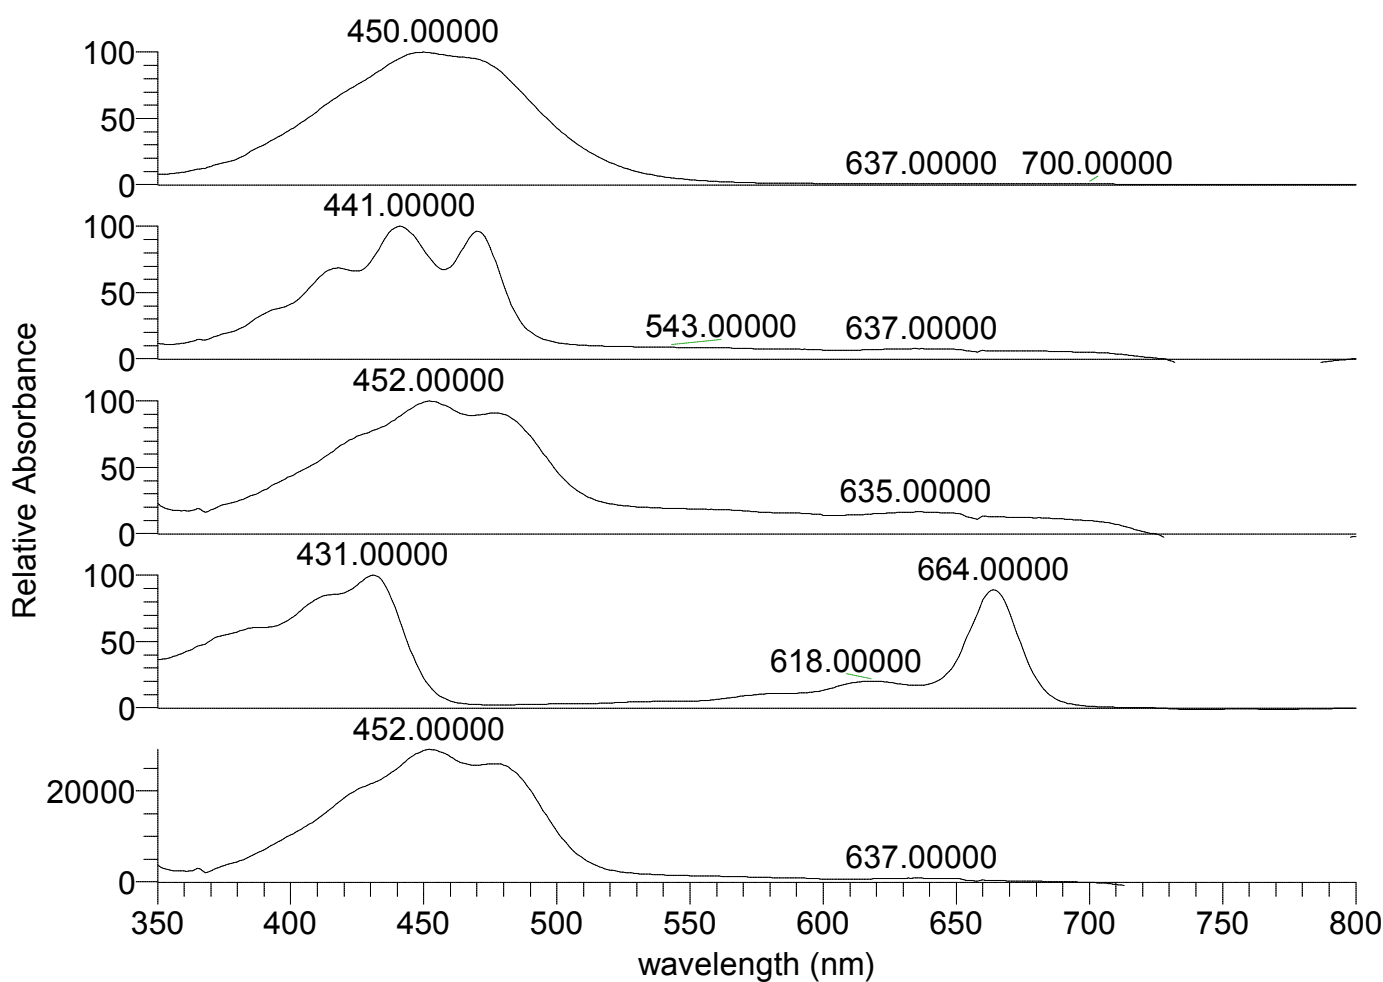

NL:  
2.63E5  
144#6195  
RT: 20.65  
AV: 1  
NL:  
2.81E4  
144#6488  
RT: 21.63  
AV: 1  
NL:  
1.28E4  
144#7333  
RT: 24.44  
AV: 1  
NL:  
1.69E5  
144#10834  
RT: 36.11  
AV: 1  
NL:  
2.91E4  
144#13085  
RT: 43.62  
AV: 1

Supplement: Data_Sheet_1.zip [file Muestra144_HPLC-UV.pdf › Carotenoids/Muestra144_HPLC-UV.pdf]

RT: 0.00 - 61.20

NL:  
2.10E5  
Total Scan  
PDA 145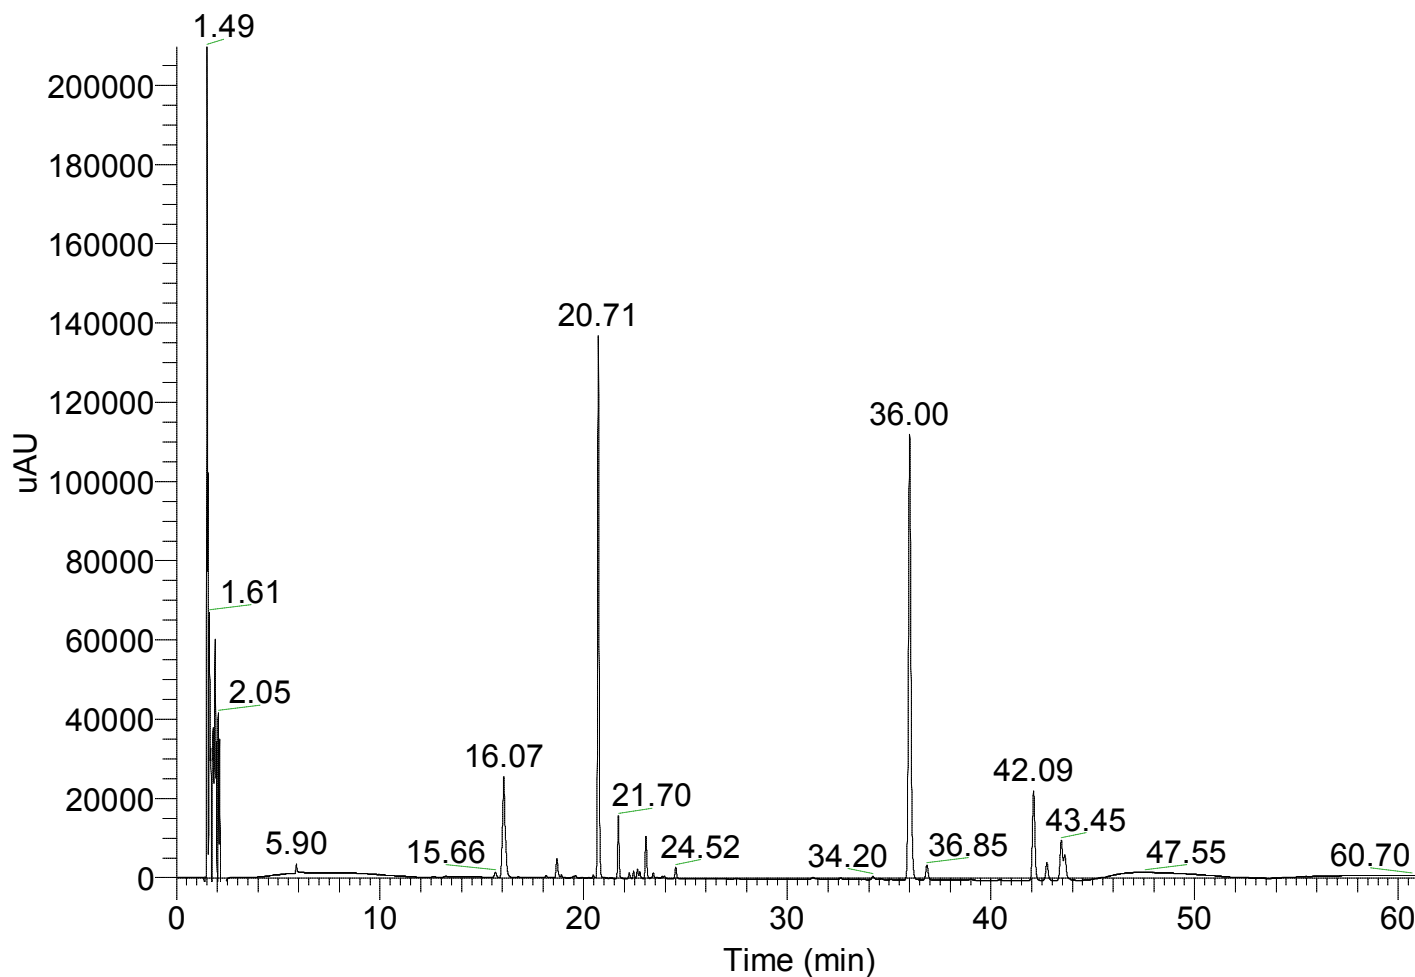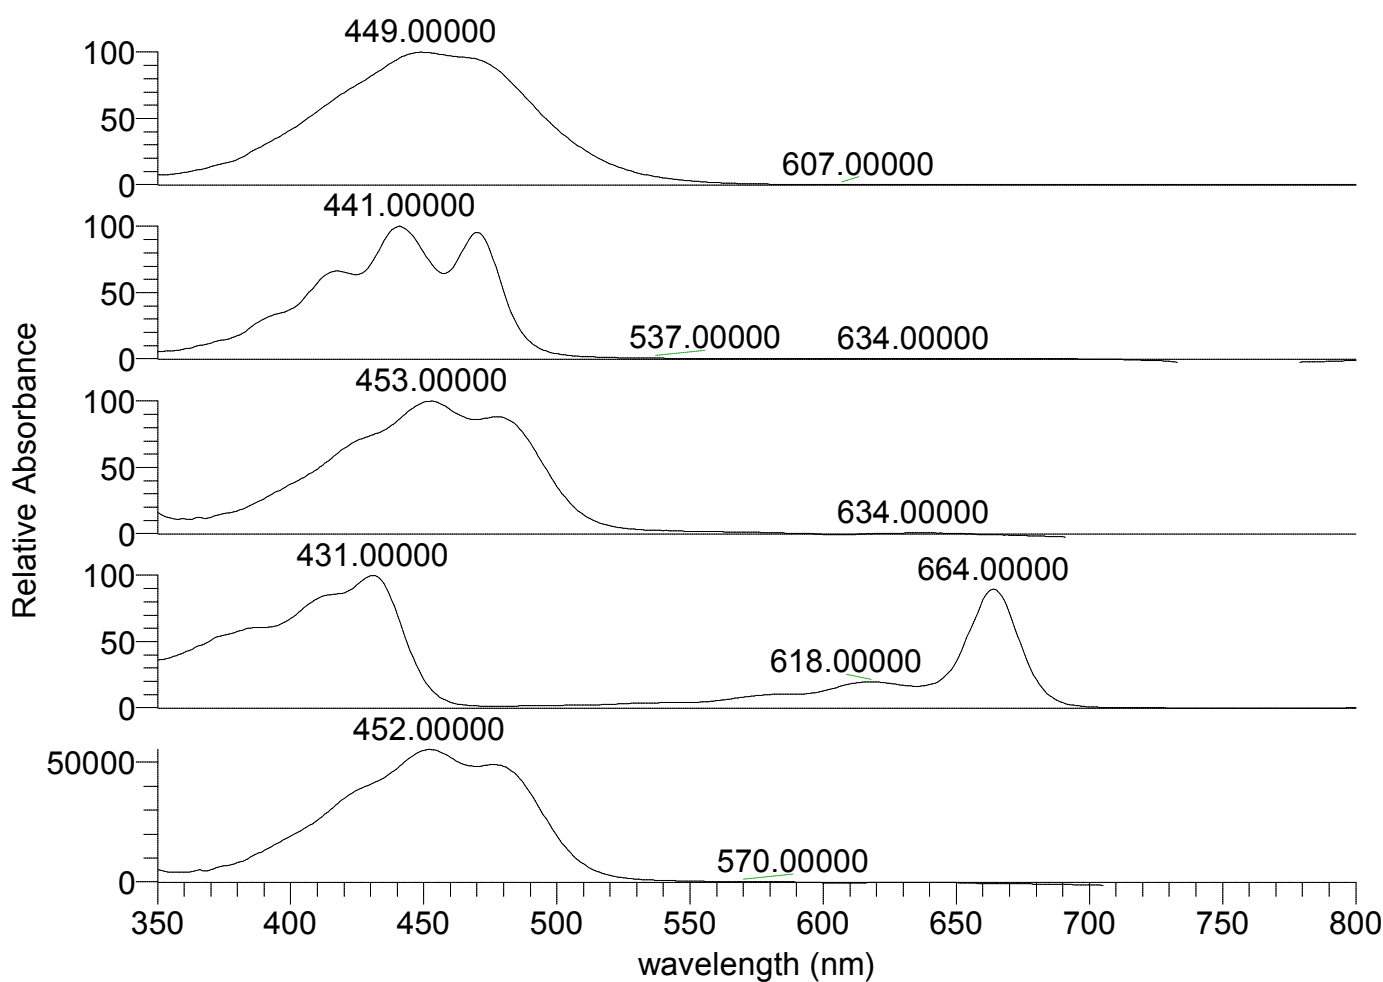

NL:  
6.44E5  
145#6214  
RT: 20.71  
AV: 1

NL:  
1.00E5  
145#6511  
RT: 21.70  
AV: 1

NL:  
1.62E4  
145#7354  
RT: 24.51  
AV: 1

NL:  
4.96E5  
145#10800  
RT: 36.00  
AV: 1

NL:  
5.53E4  
145#13035  
RT: 43.45  
AV: 1

Supplement: Data_Sheet_1.zip [file Muestra145_HPLC-UV-Vis.pdf › Carotenoids/Muestra145_HPLC-UV-Vis.pdf]

RT: 0.00 - 61.20

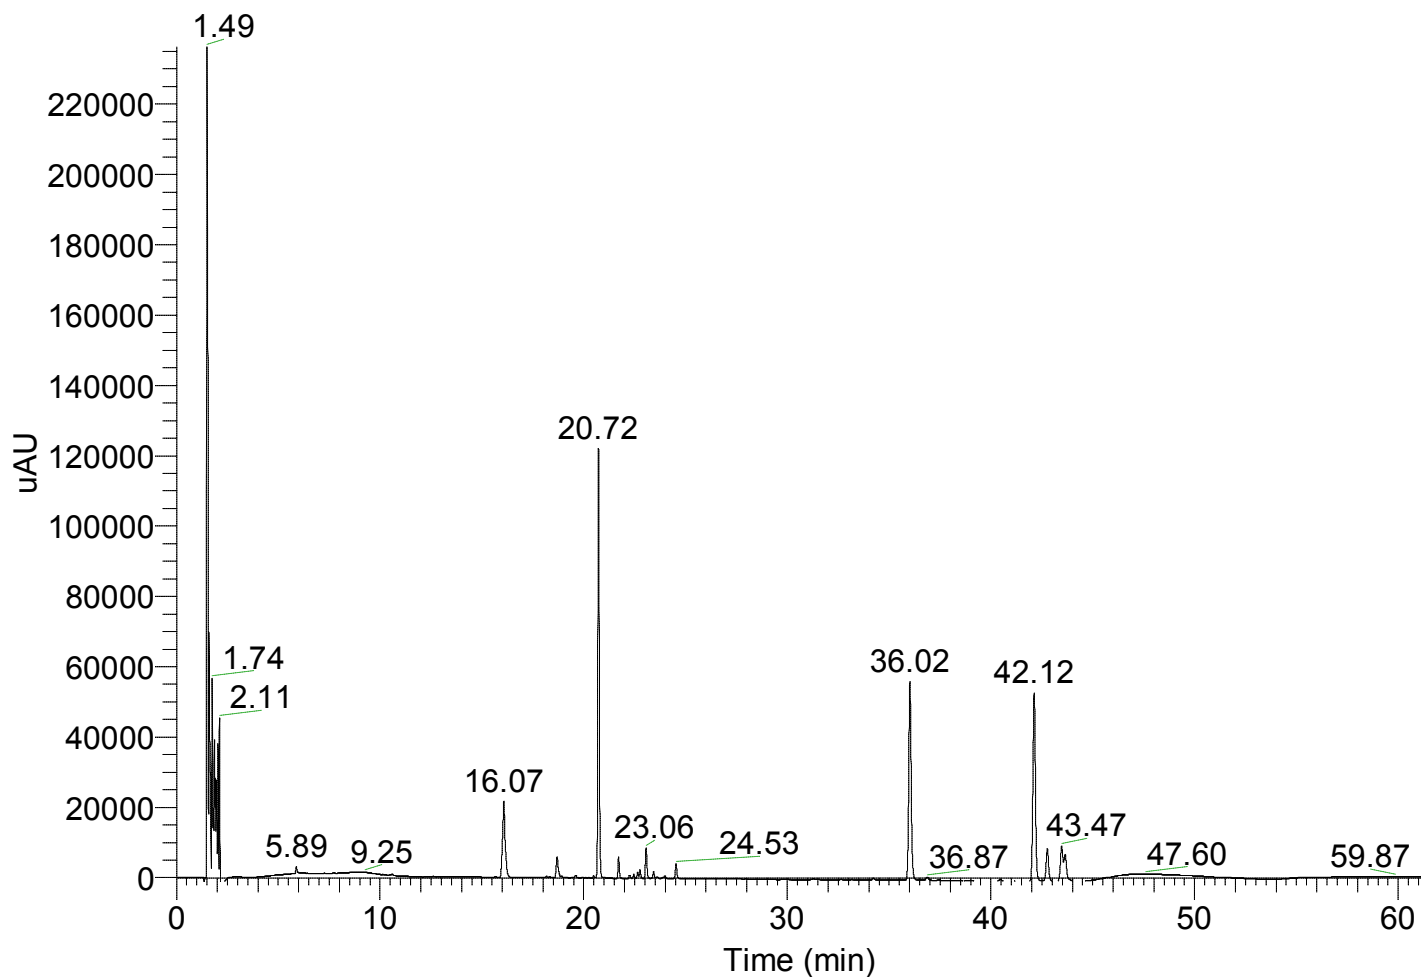

NL:  
2.36E5  
Total Scan  
PDA 146

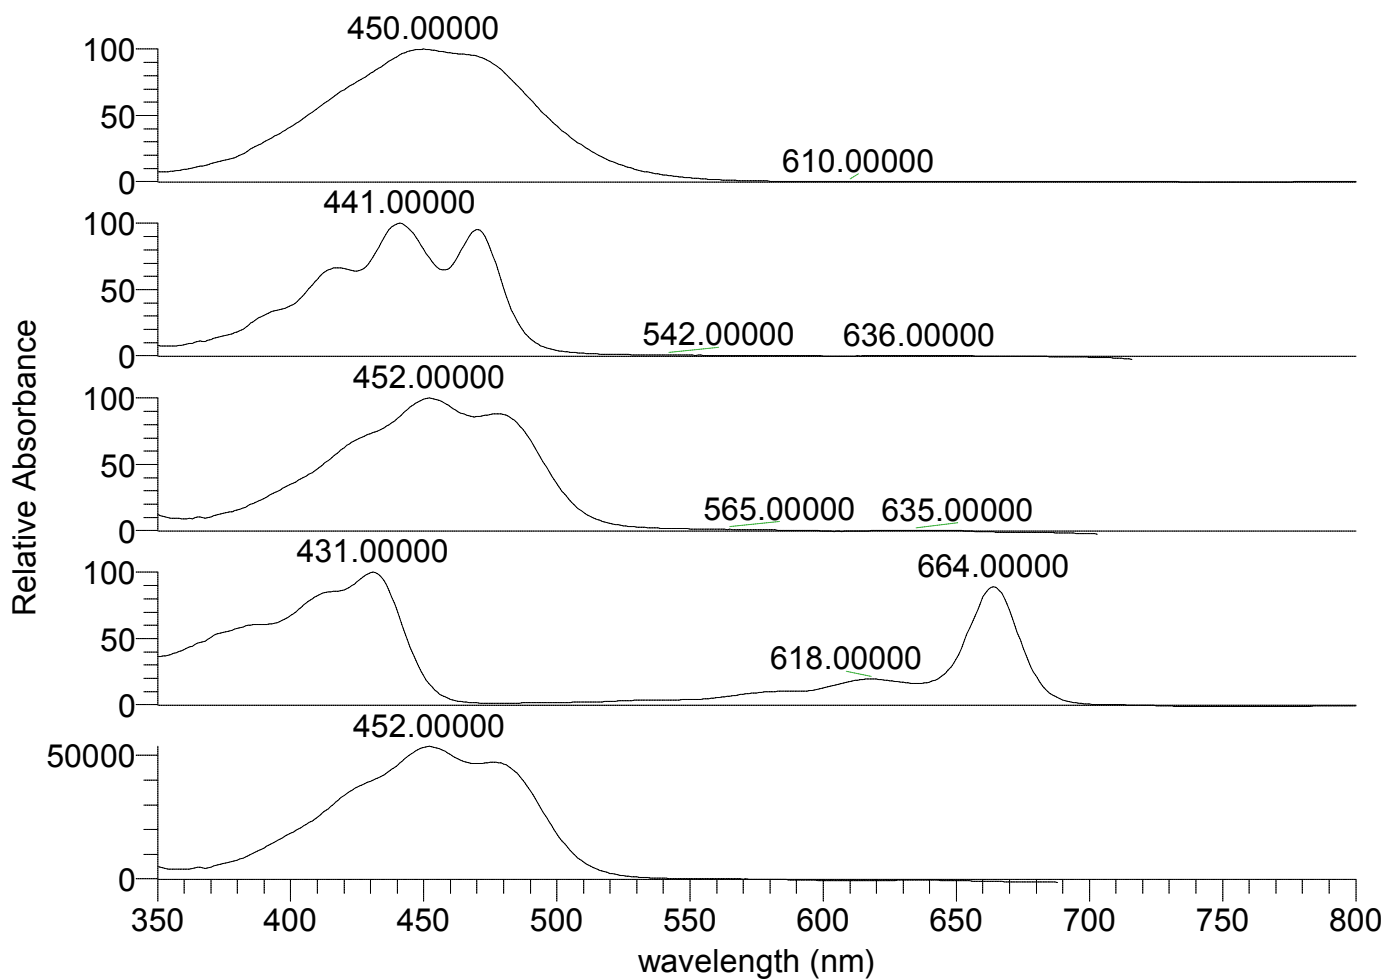

NL:  
5.69E5  
146#6216  
RT: 20.72  
AV: 1

NL:  
4.09E4  
146#6513  
RT: 21.71  
AV: 1

NL:  
2.39E4  
146#7359  
RT: 24.53  
AV: 1

NL:  
2.50E5  
146#10805  
RT: 36.02  
AV: 1

NL:  
5.36E4  
146#13041  
RT: 43.47  
AV: 1

Supplement: Data_Sheet_1.zip [file Muestra146_HPLC-UV-Vis.pdf › Carotenoids/Muestra146_HPLC-UV-Vis.pdf]

RT: 0.00 - 61.20

NL:  
2.28E5  
Total Scan  
PDA 147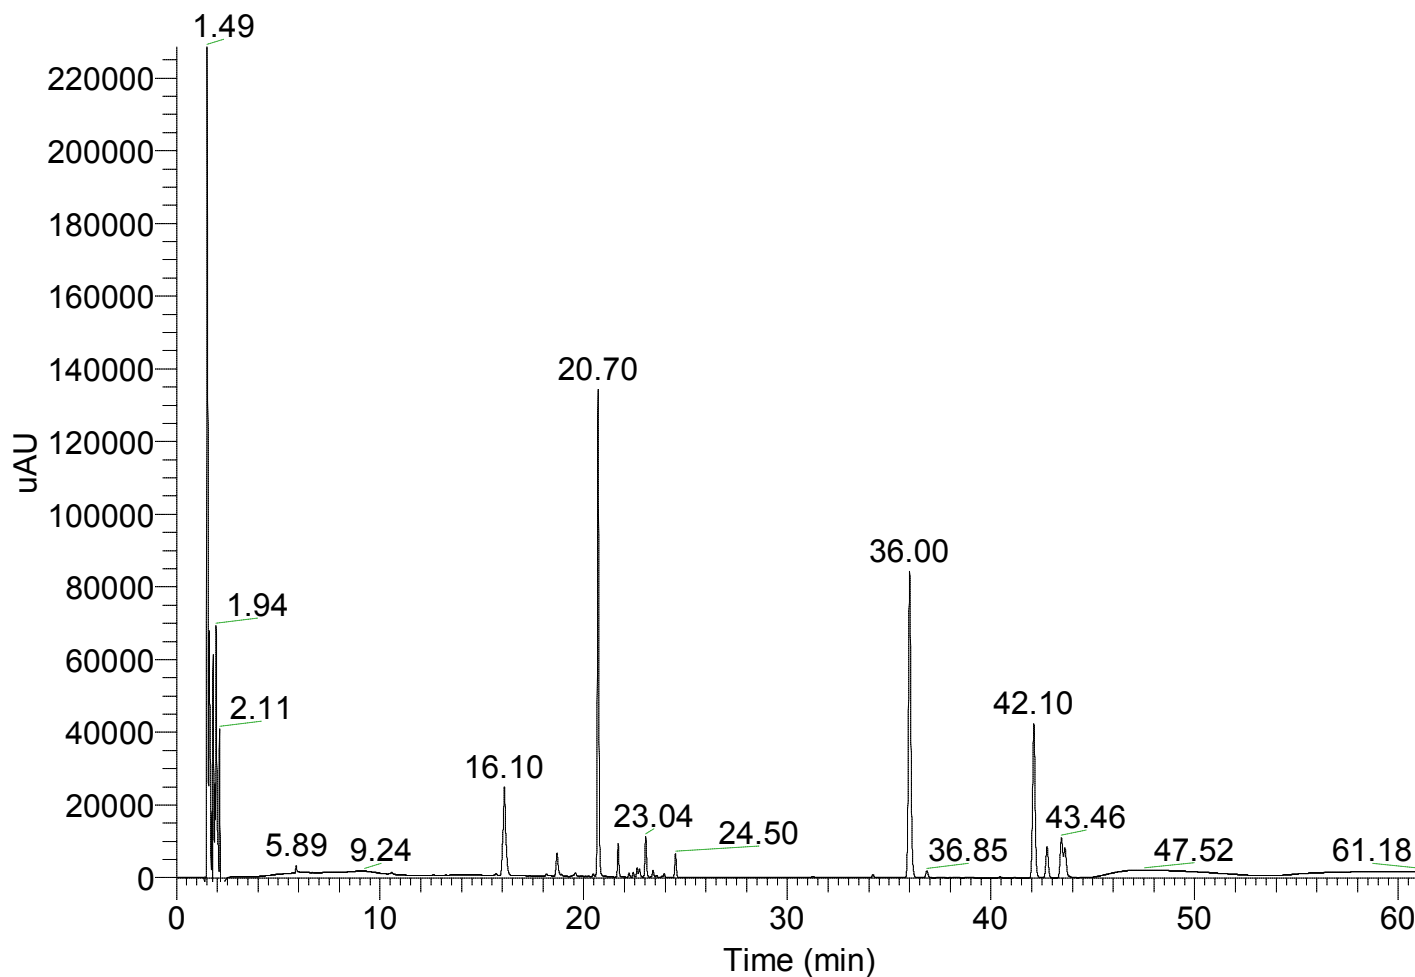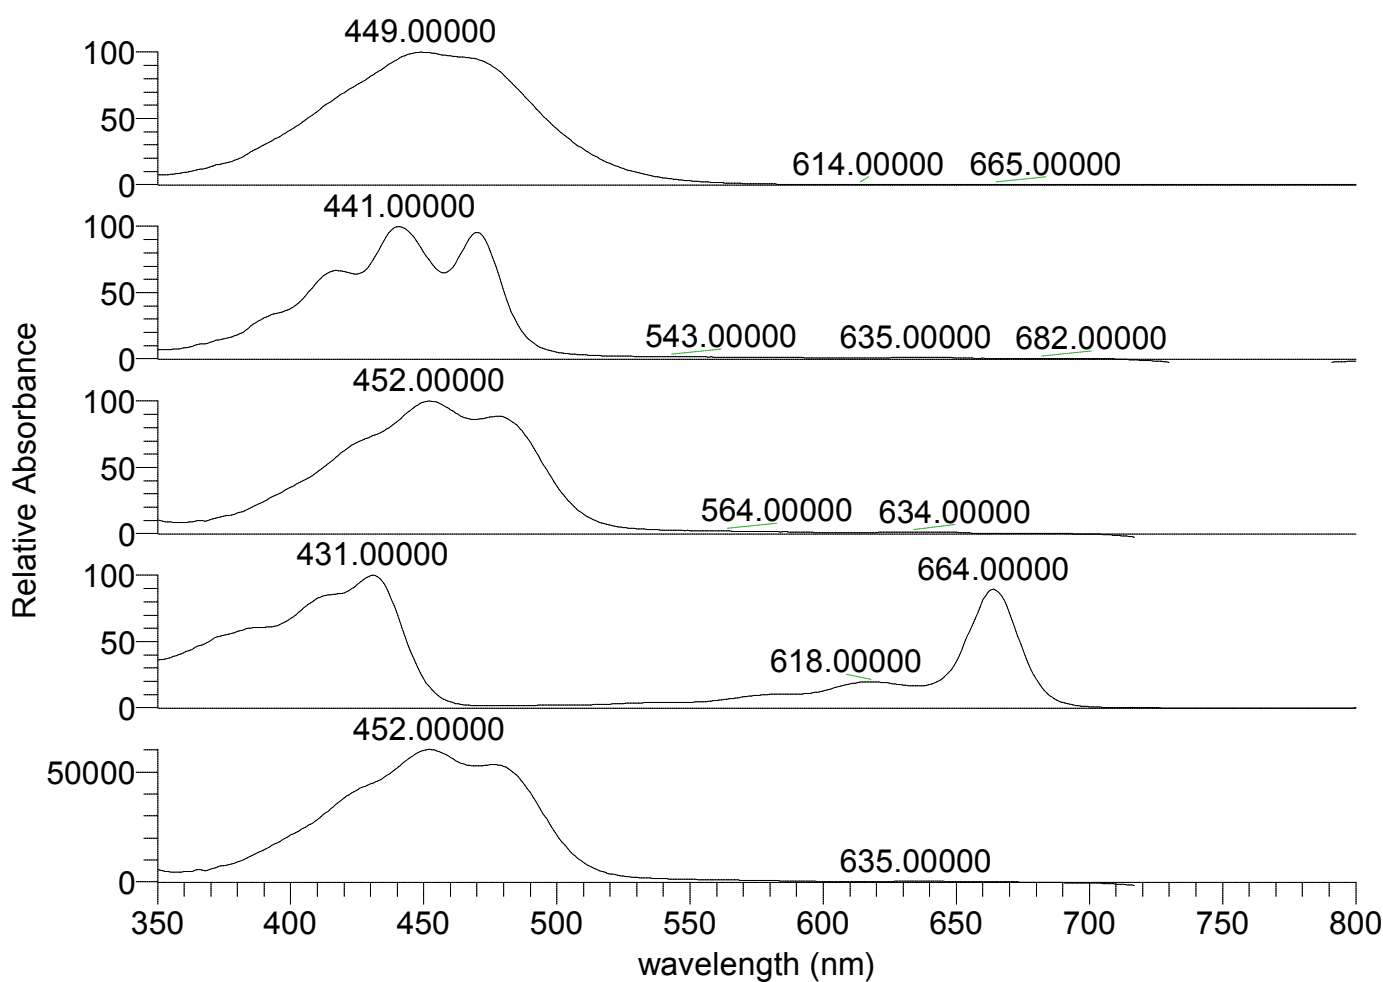

NL:  
6.29E5  
147#6211  
RT: 20.70  
AV: 1

NL:  
5.97E4  
147#6506  
RT: 21.69  
AV: 1

NL:  
3.61E4  
147#7350  
RT: 24.50  
AV: 1

NL:  
3.73E5  
147#10800  
RT: 36.00  
AV: 1

NL:  
6.02E4  
147#13038  
RT: 43.46  
AV: 1

Supplement: Data_Sheet_1.zip [file Muestra147_HPLC-UV-Vis.pdf › Carotenoids/Muestra147_HPLC-UV-Vis.pdf]

RT: 0.00 - 61.20

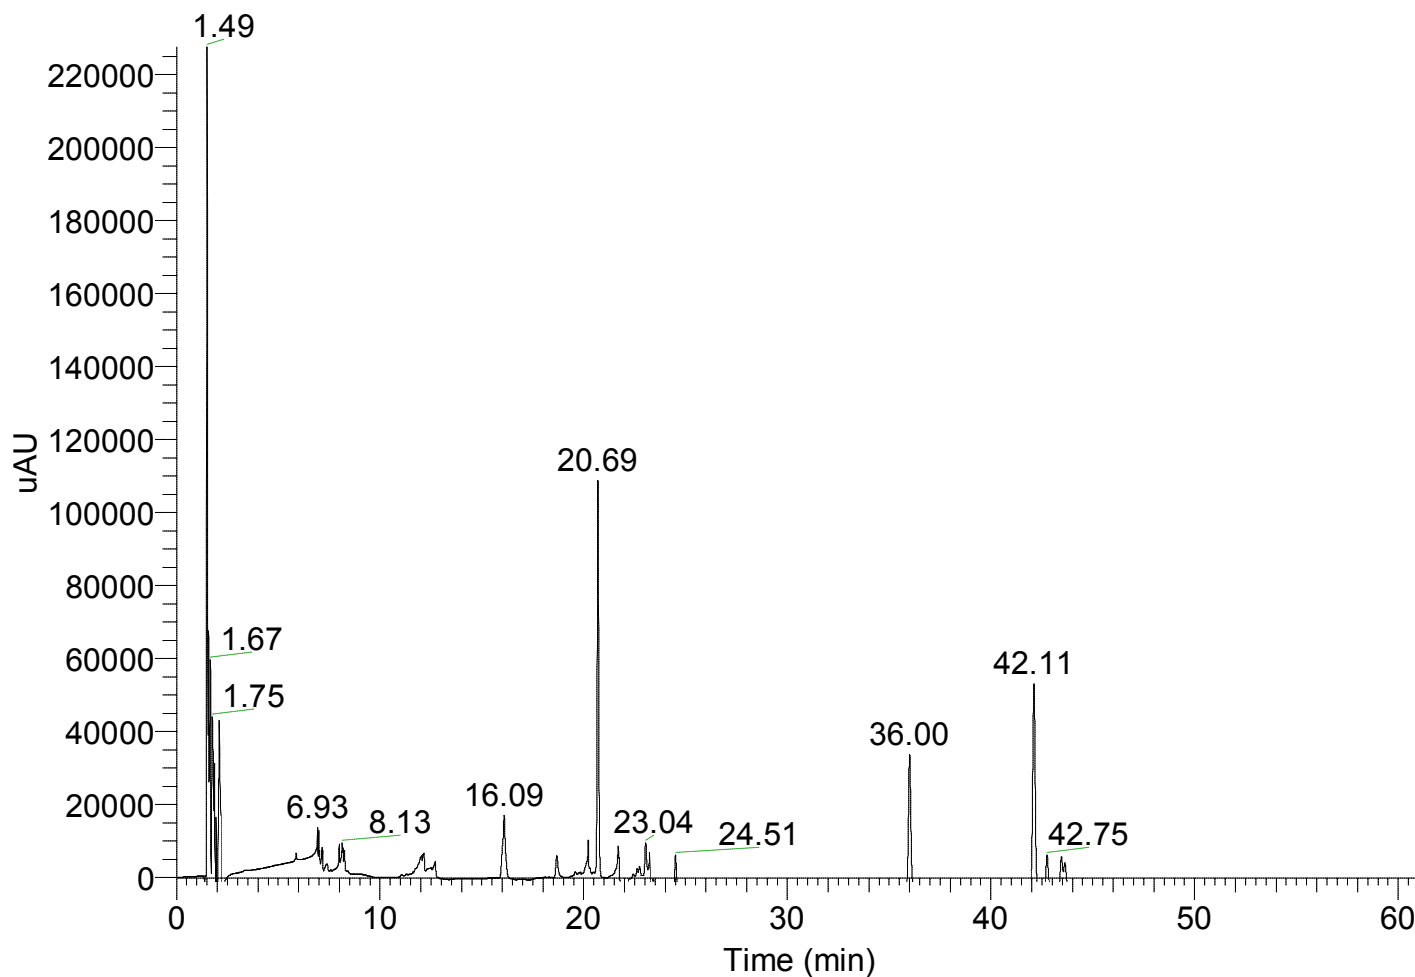

NL:  
2.27E5  
Total Scan  
PDA 148

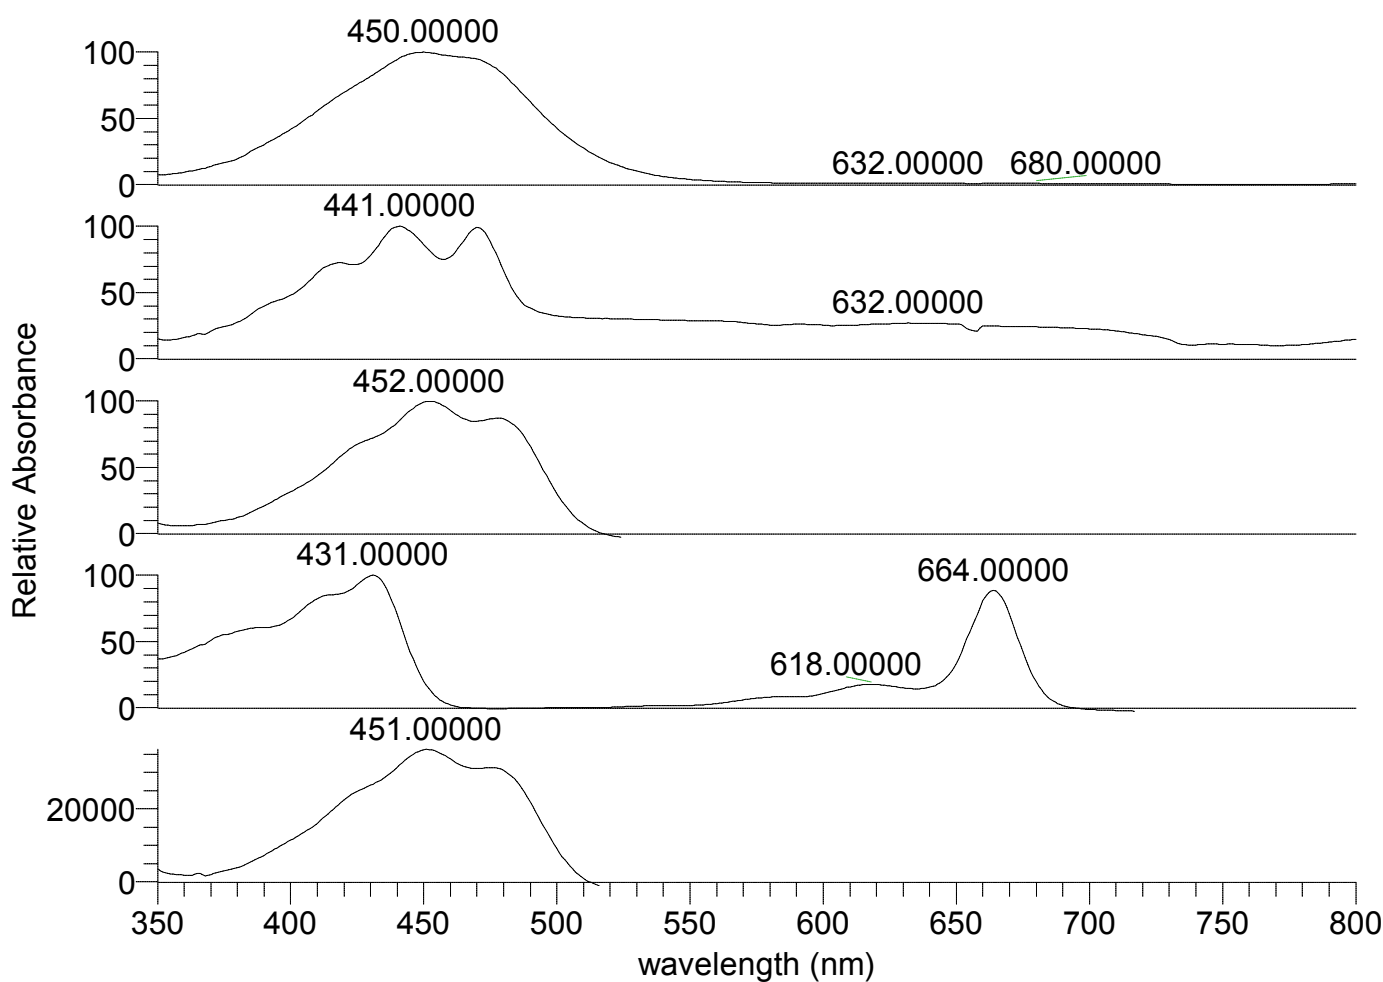

NL:  
4.96E5  
148#6208  
RT: 20.69  
AV: 1

NL:  
2.53E4  
148#6506  
RT: 21.69  
AV: 1

NL:  
4.52E4  
148#7354  
RT: 24.51  
AV: 1

NL:  
1.64E5  
148#10800  
RT: 36.00  
AV: 1

NL:  
3.63E4  
148#13052  
RT: 43.51  
AV: 1

Supplement: Data_Sheet_1.zip [file Muestra148_HPLC-UV-Vis.pdf › Carotenoids/Muestra148_HPLC-UV-Vis.pdf]

RT: 0.00 - 61.20

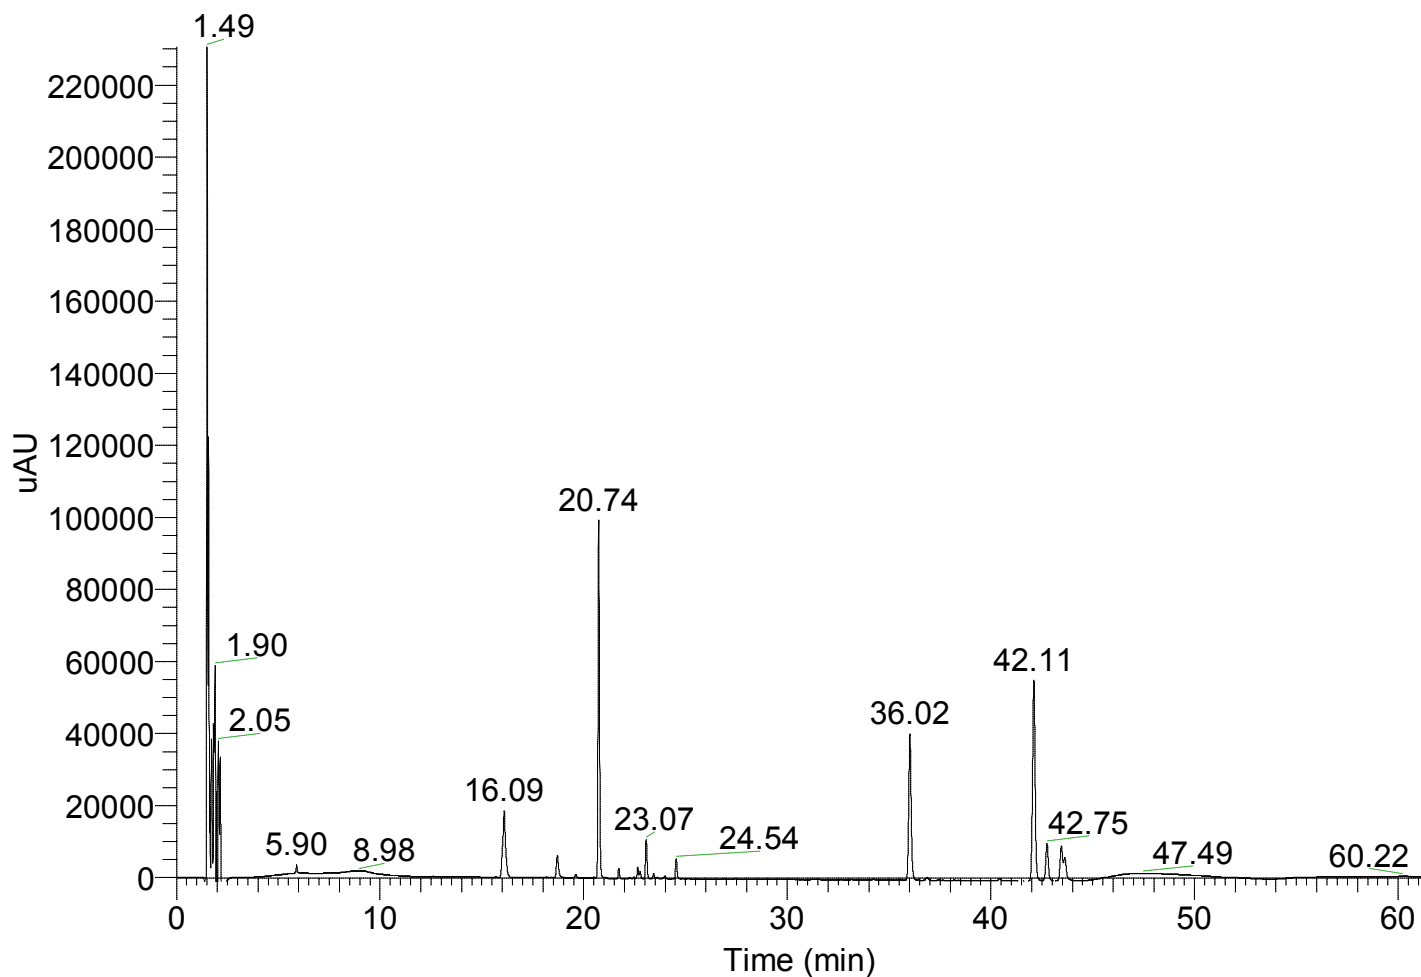

NL:  
2.30E5  
Total Scan  
PDA 149

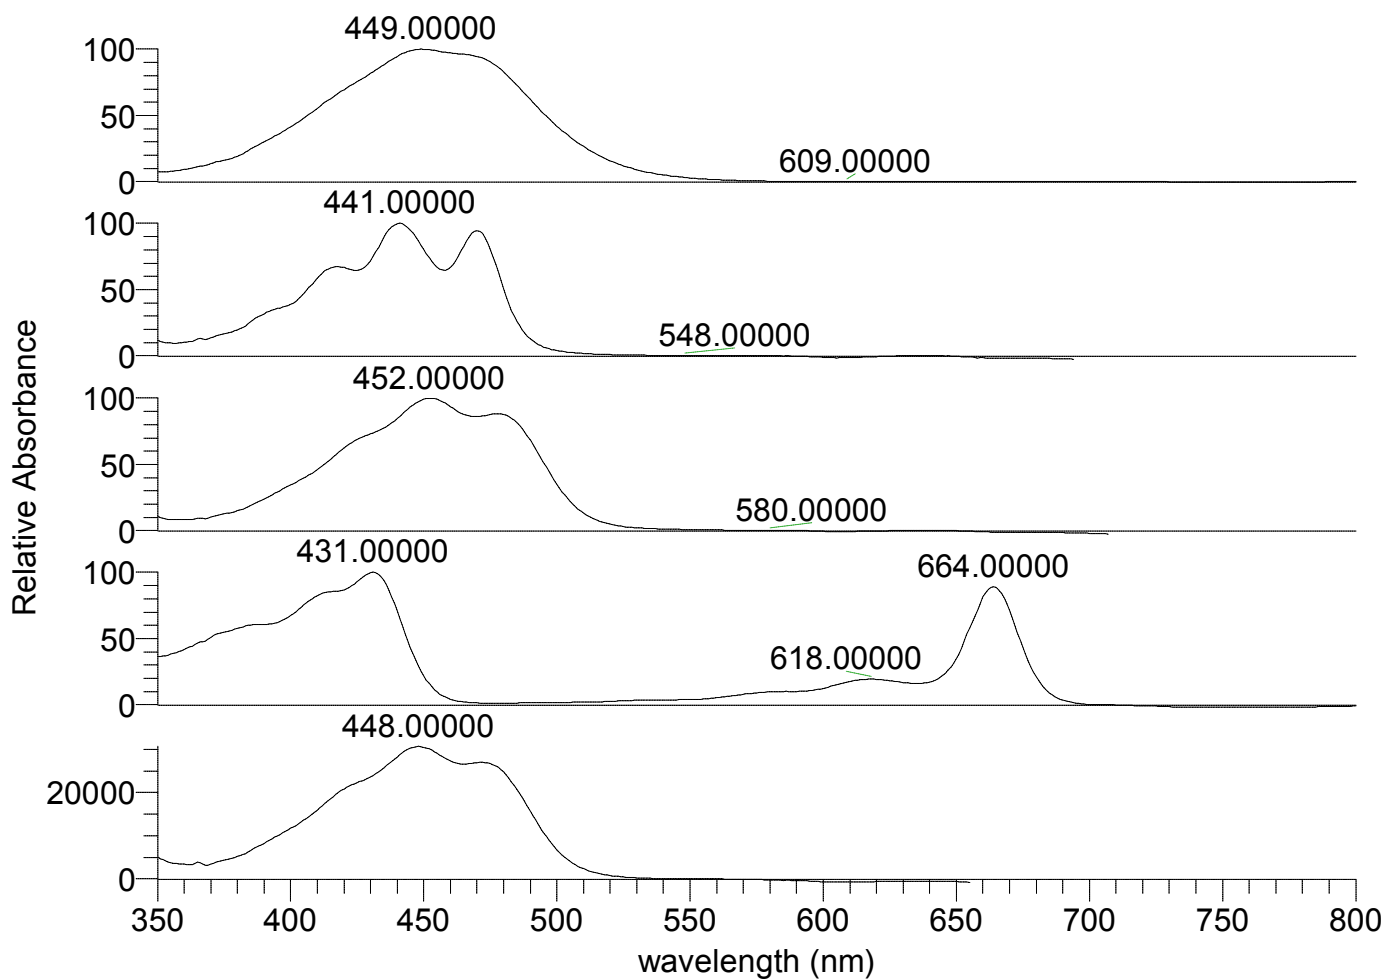

NL:  
4.55E5  
149#6223  
RT: 20.74  
AV: 1  
NL:  
2.03E4  
149#6516  
RT: 21.72  
AV: 1  
NL:  
3.11E4  
149#7362  
RT: 24.54  
AV: 1  
NL:  
1.80E5  
149#10805  
RT: 36.02  
AV: 1  
NL:  
3.06E4  
149#13074  
RT: 43.58  
AV: 1

Supplement: Data_Sheet_1.zip [file Muestra149_HPLC-UV-Vis.pdf › Carotenoids/Muestra149_HPLC-UV-Vis.pdf]

RT: 0.00 - 61.20

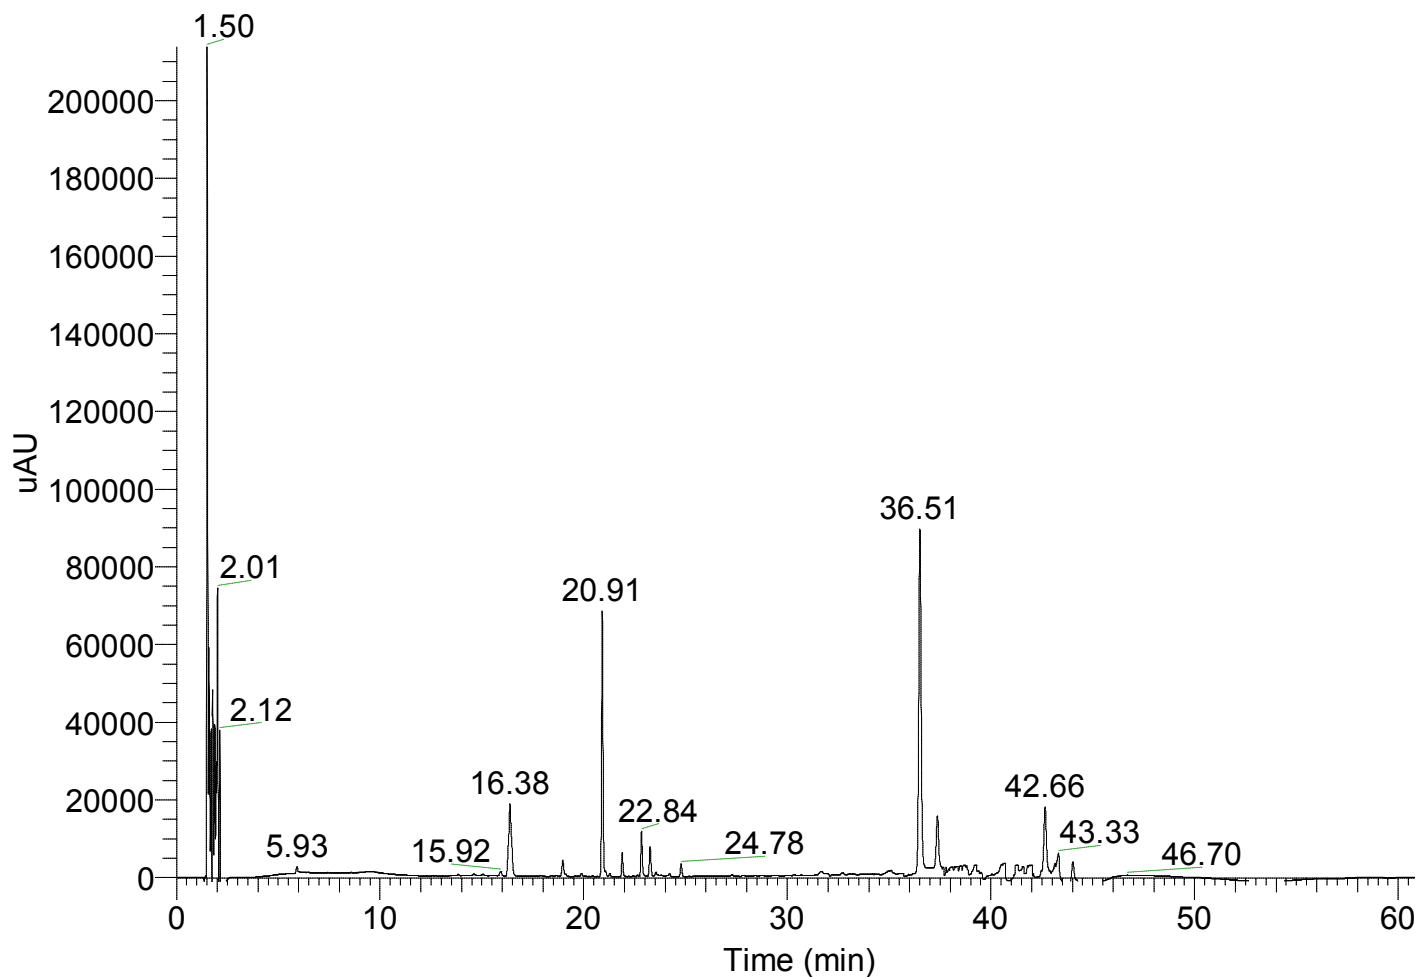

NL:  
2.14E5  
Total Scan  
PDA 14

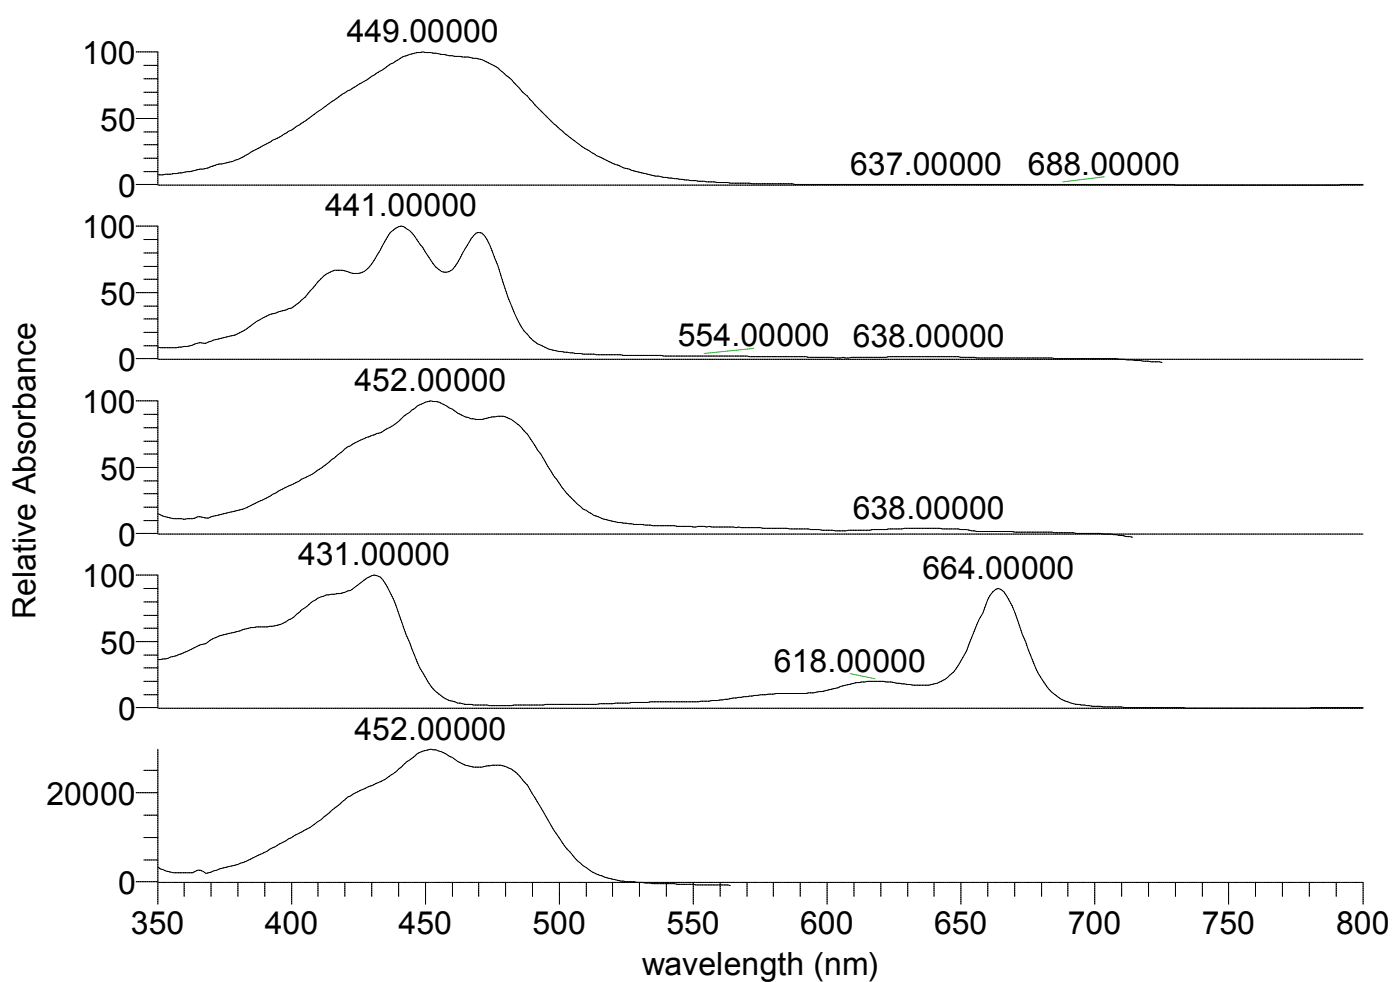

Supplement: Data_Sheet_1.zip [file Muestra14_HPLC-UV.pdf › Carotenoids/Muestra14_HPLC-UV.pdf]

RT: 0.00 - 61.20

NL:  
2.29E5  
Total Scan  
PDA 150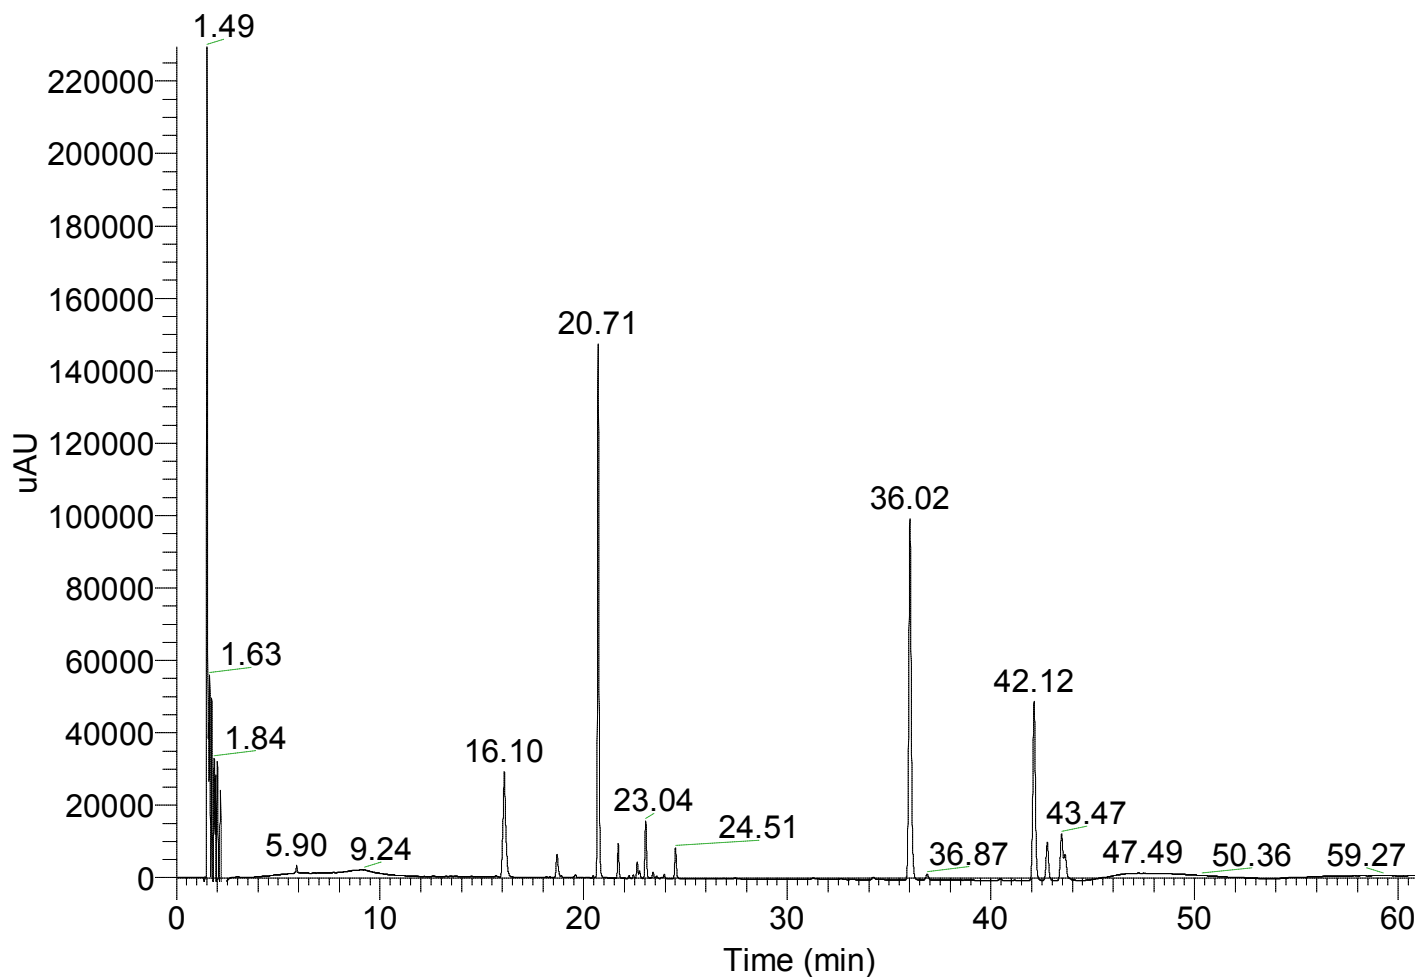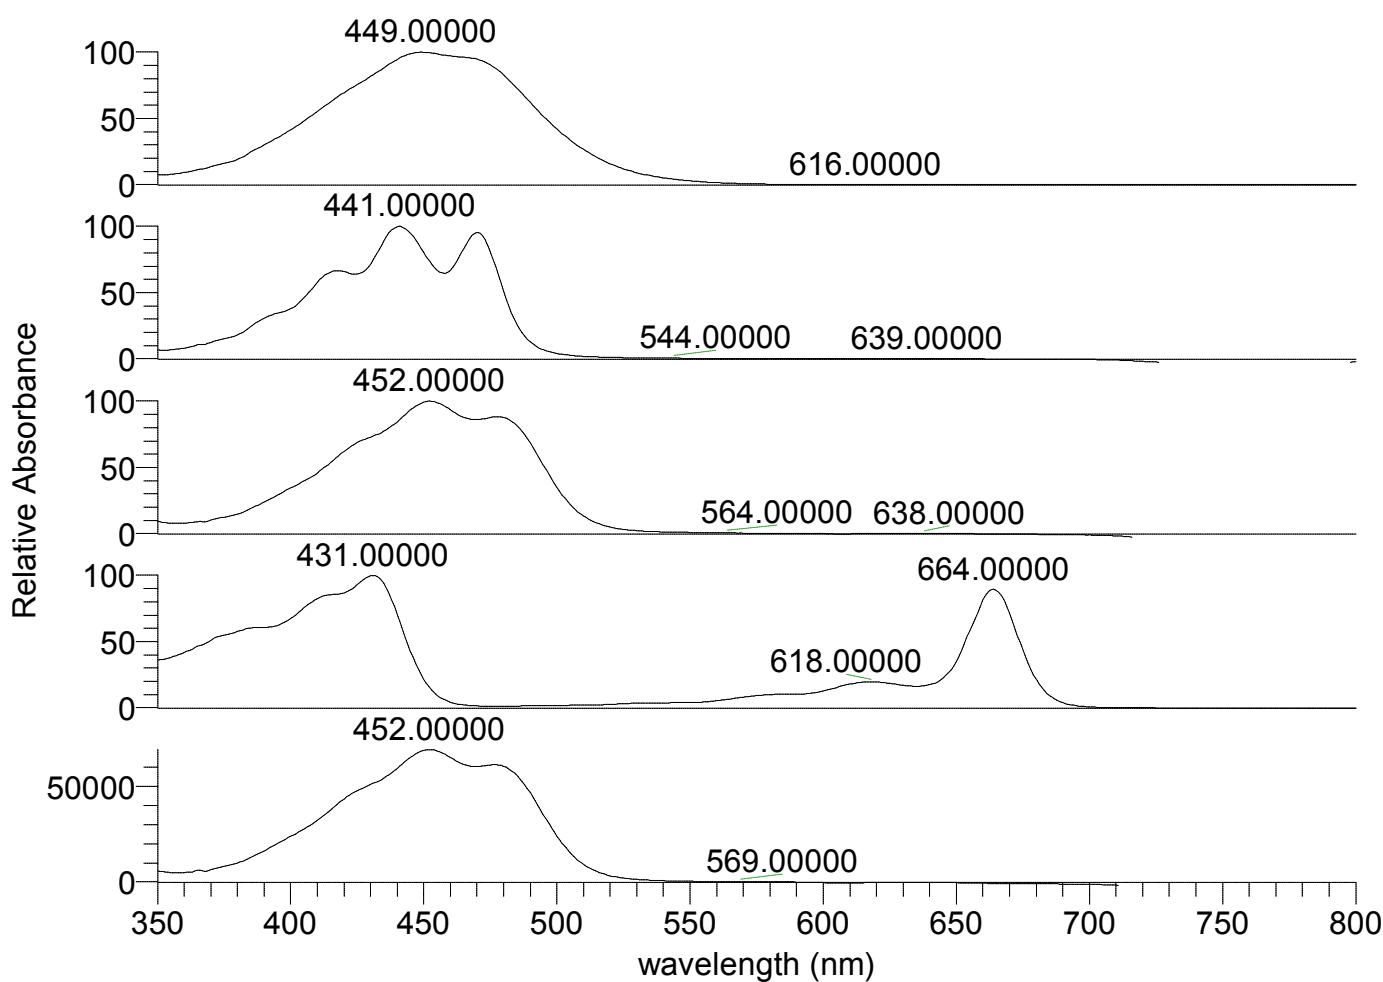

NL:  
6.93E5  
150#6213  
RT: 20.71  
AV: 1

NL:  
6.27E4  
150#6507  
RT: 21.69  
AV: 1

NL:  
4.64E4  
150#7353  
RT: 24.51  
AV: 1

NL:  
4.40E5  
150#10805  
RT: 36.02  
AV: 1

NL:  
6.91E4  
150#13041  
RT: 43.47  
AV: 1

Supplement: Data_Sheet_1.zip [file Muestra150_HPLC-UV-Vis.pdf › Carotenoids/Muestra150_HPLC-UV-Vis.pdf]

RT: 0.00 - 61.20

NL:  
2.10E5  
Total Scan  
PDA 151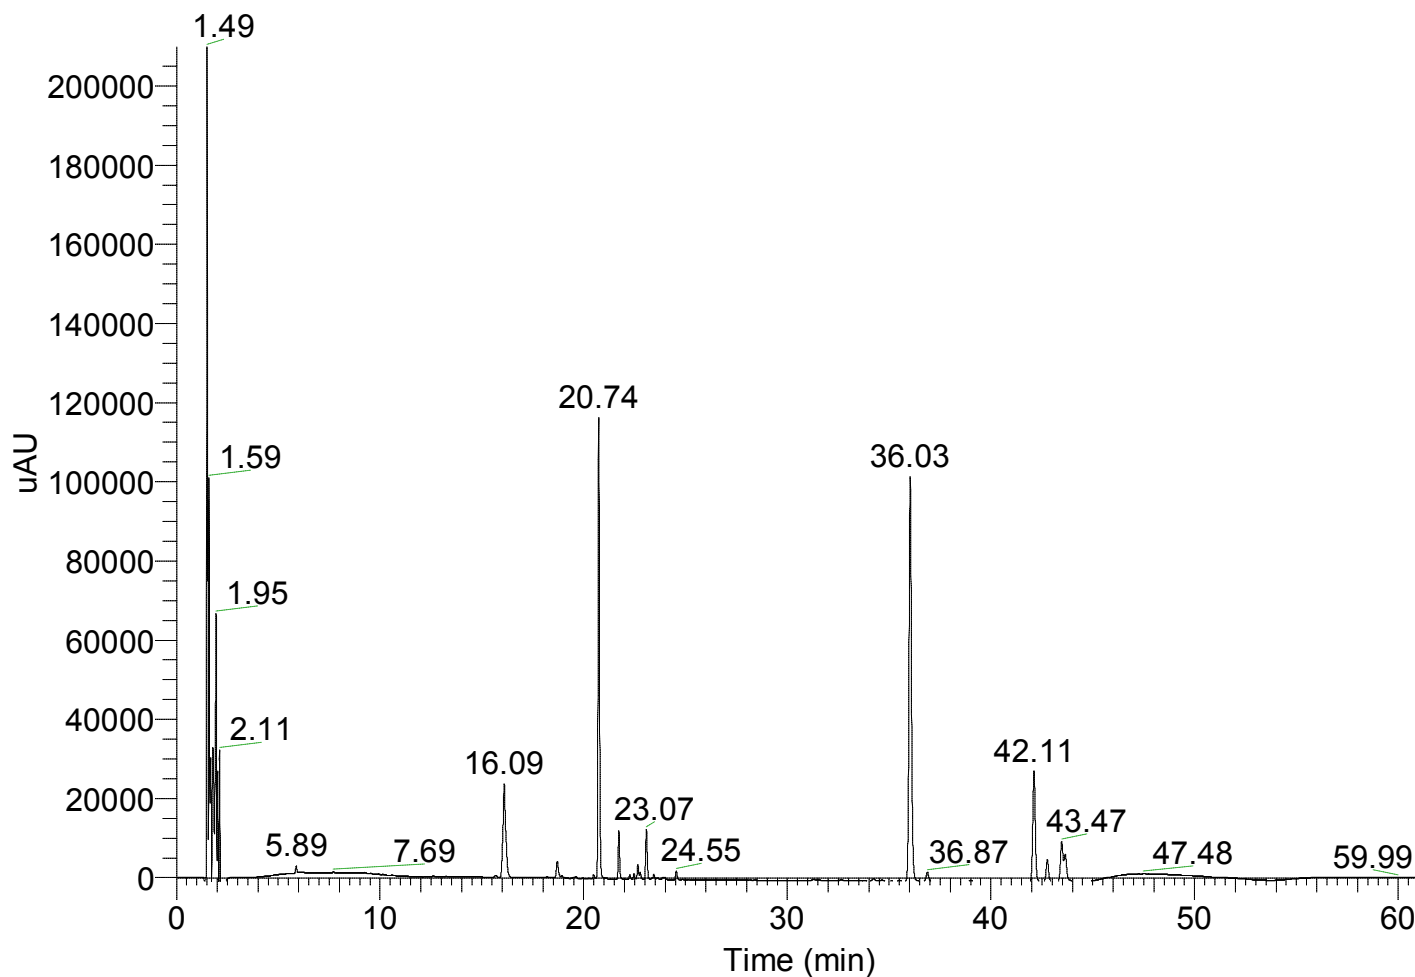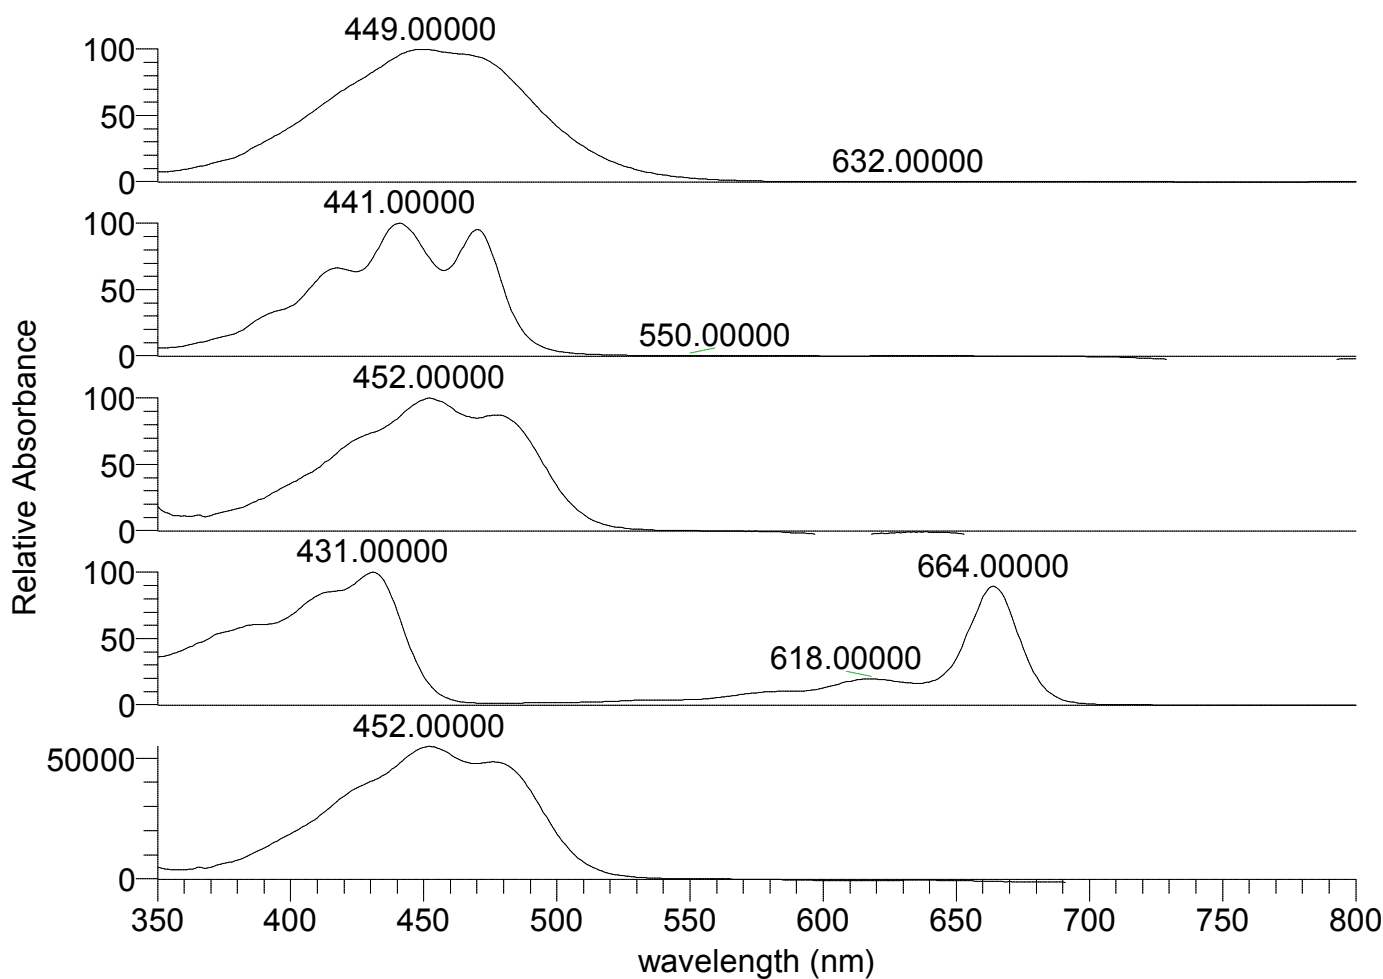

NL:  
5.44E5  
151#6222  
RT: 20.74  
AV: 1

NL:  
7.86E4  
151#6518  
RT: 21.73  
AV: 1

NL:  
1.26E4  
151#7364  
RT: 24.55  
AV: 1

NL:  
4.52E5  
151#10809  
RT: 36.03  
AV: 1

NL:  
5.48E4  
151#13041  
RT: 43.47  
AV: 1

Supplement: Data_Sheet_1.zip [file Muestra151_HPLC-UV-Vis.pdf › Carotenoids/Muestra151_HPLC-UV-Vis.pdf]

RT: 0.00 - 61.20

NL:  
2.15E5  
Total Scan  
PDA 152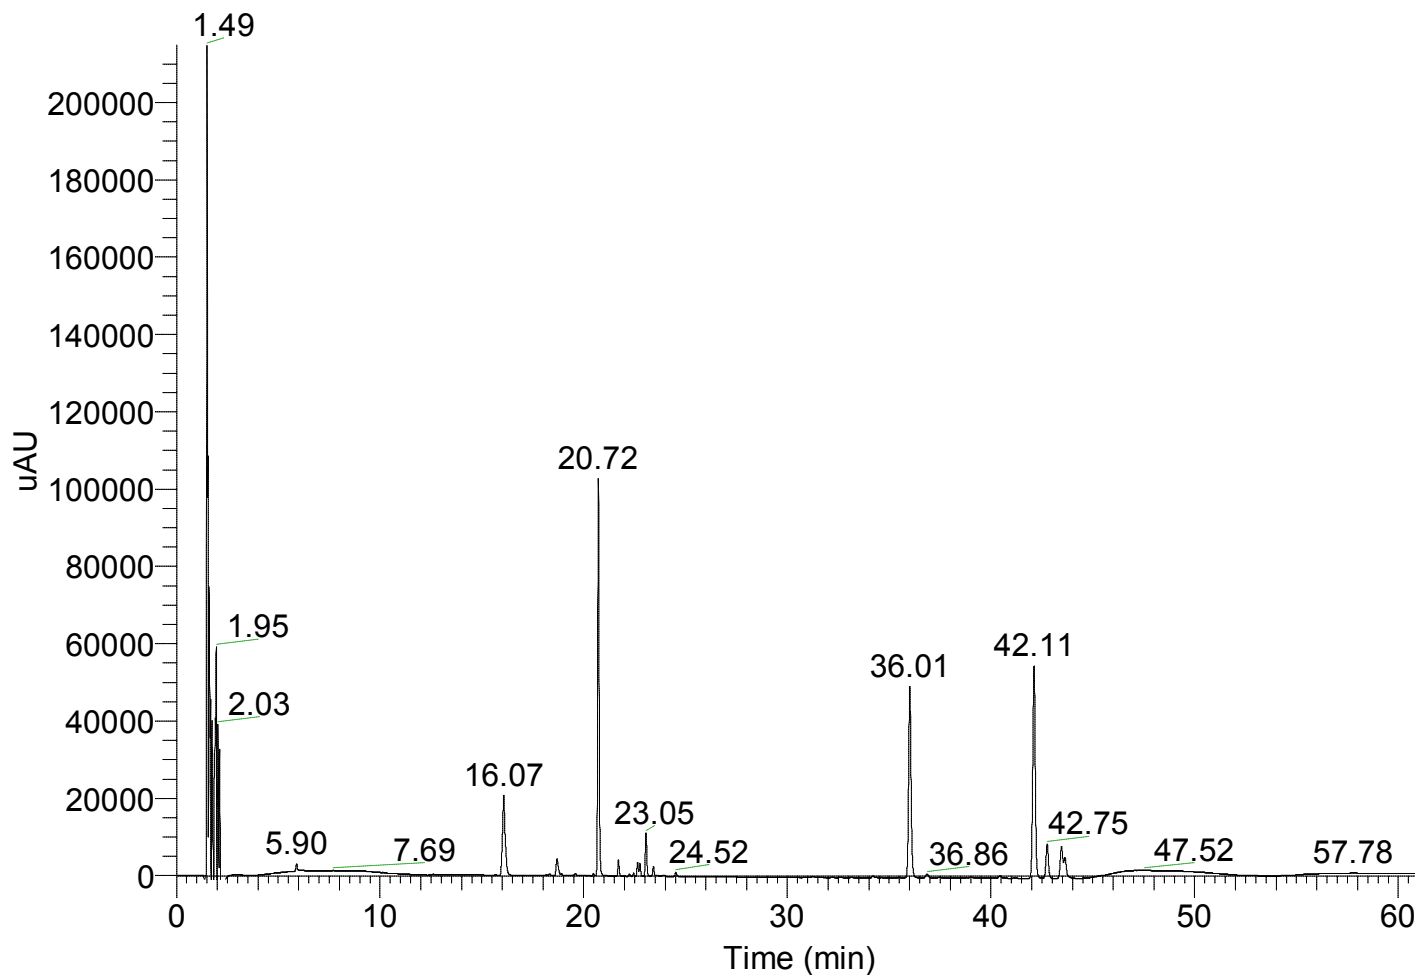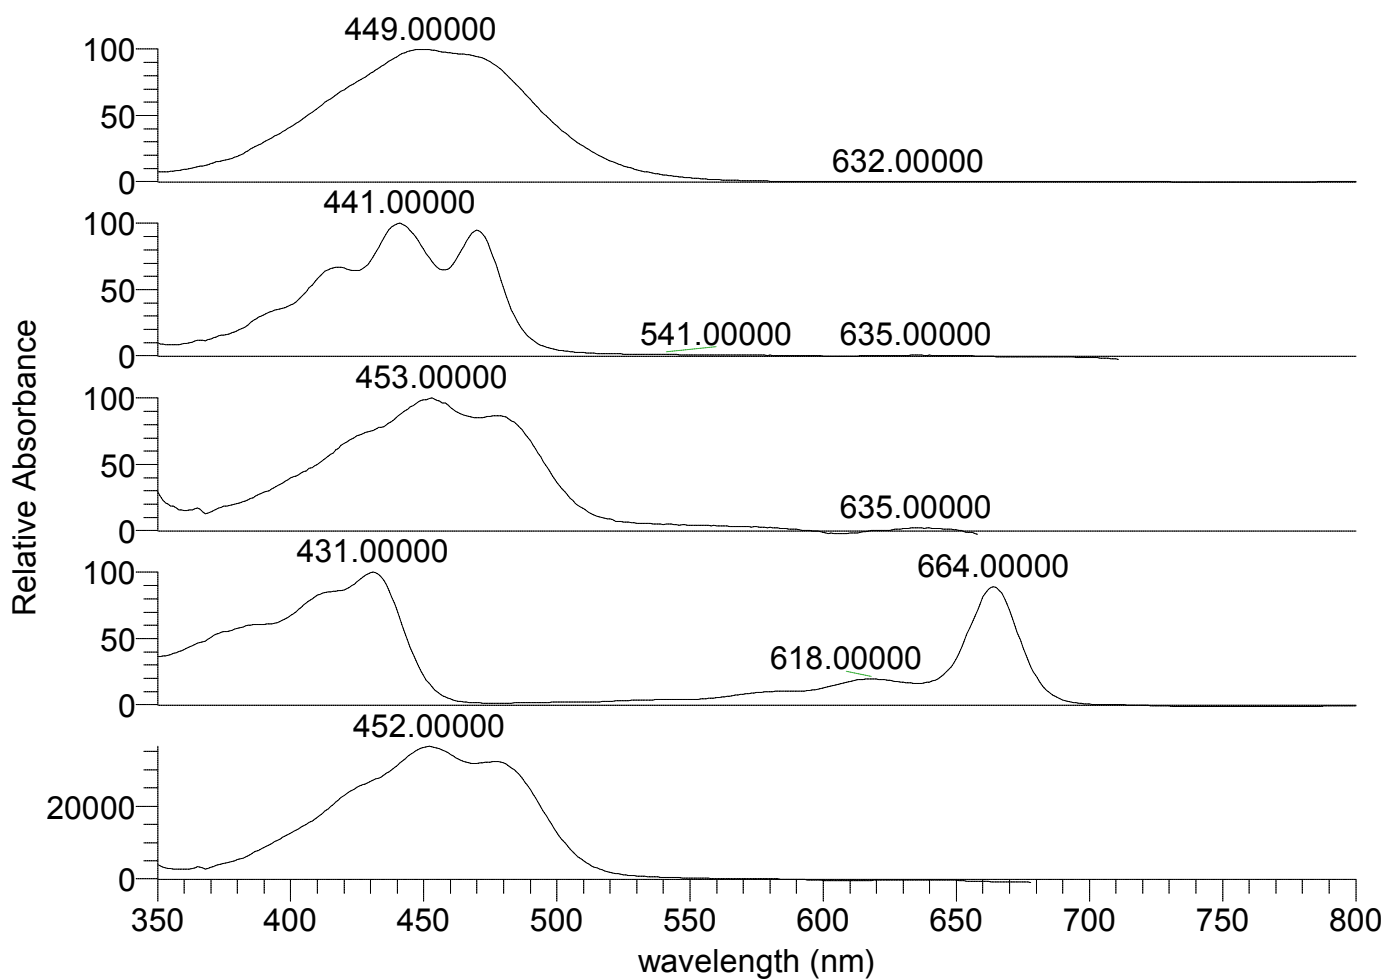

NL:  
4.69E5  
152#6217  
RT: 20.72  
AV: 1

NL:  
2.87E4  
152#6510  
RT: 21.70  
AV: 1

NL:  
6.93E3  
152#7355  
RT: 24.52  
AV: 1

NL:  
2.20E5  
152#10803  
RT: 36.01  
AV: 1

NL:  
3.64E4  
152#13026  
RT: 43.42  
AV: 1

Supplement: Data_Sheet_1.zip [file Muestra152_HPLC-UV-Vis.pdf › Carotenoids/Muestra152_HPLC-UV-Vis.pdf]

RT: 0.00 - 61.23

NL:  
2.20E5  
Total Scan  
PDA 153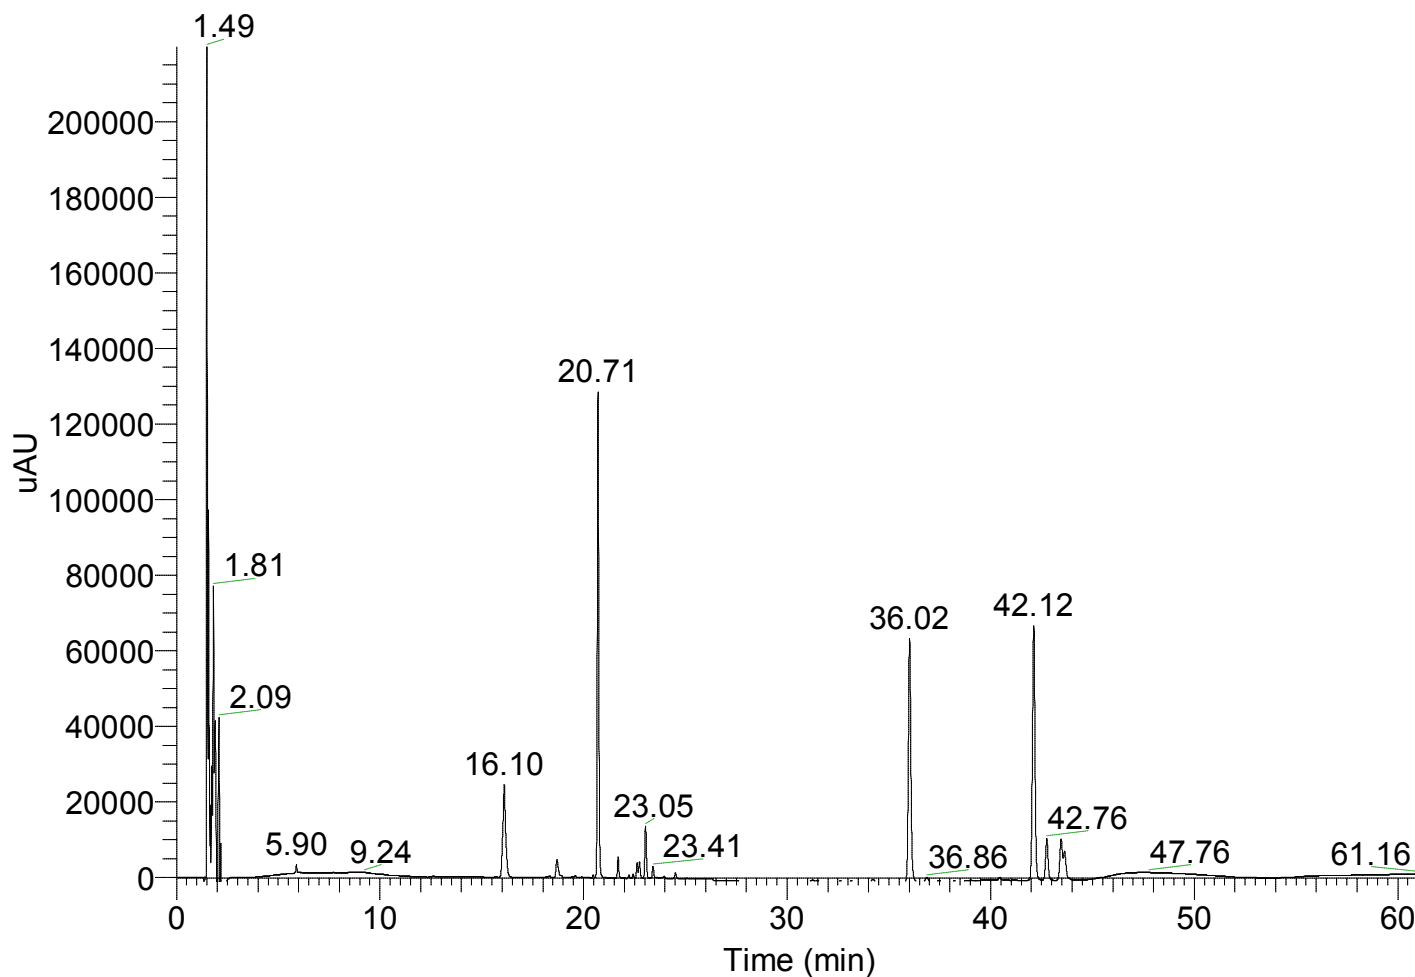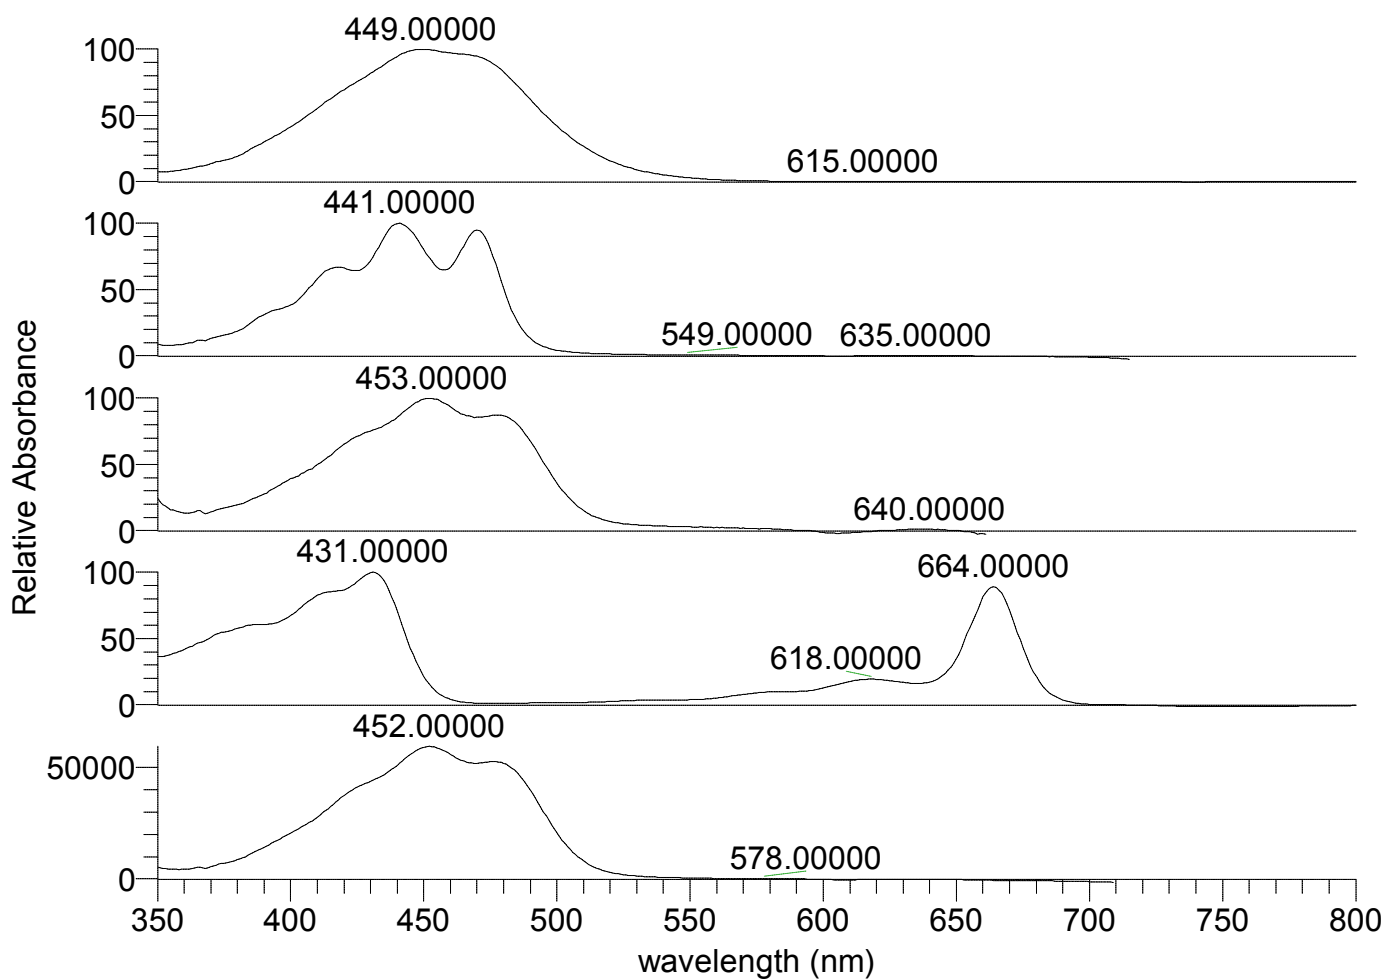

NL:  
5.94E5  
153#6214  
RT: 20.71  
AV: 1

NL:  
3.61E4  
153#6510  
RT: 21.70  
AV: 1

NL:  
9.27E3  
153#7354  
RT: 24.51  
AV: 1

NL:  
2.83E5  
153#10806  
RT: 36.02  
AV: 1

NL:  
5.93E4  
153#13037  
RT: 43.46  
AV: 1

Supplement: Data_Sheet_1.zip [file Muestra153_HPLC-UV-Vis.pdf › Carotenoids/Muestra153_HPLC-UV-Vis.pdf]

RT: 0.00 - 61.20

NL:  
2.07E5  
Total Scan  
PDA 15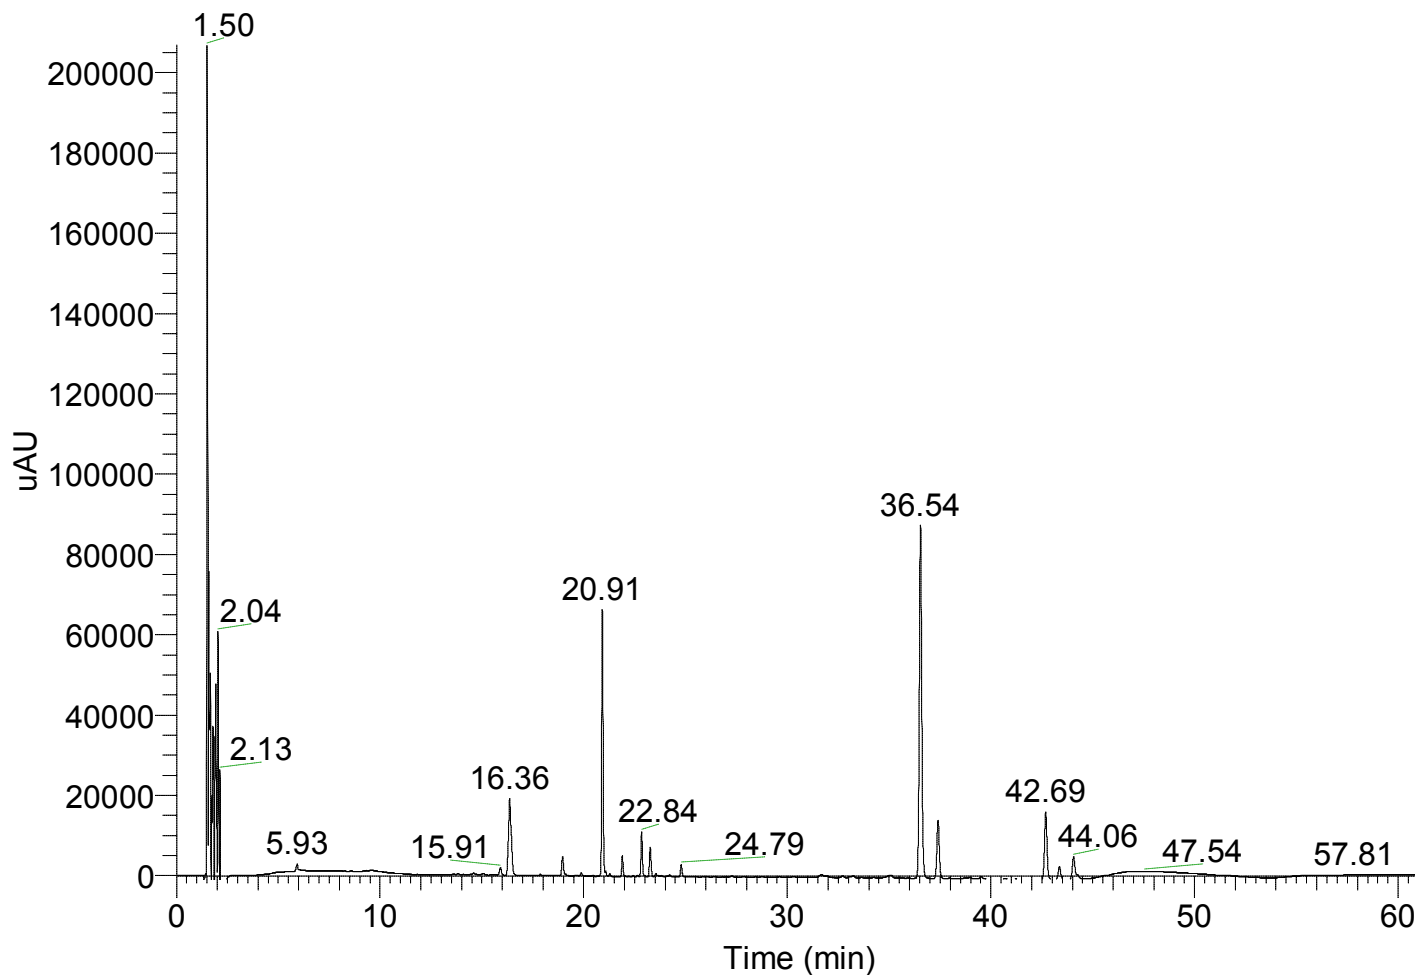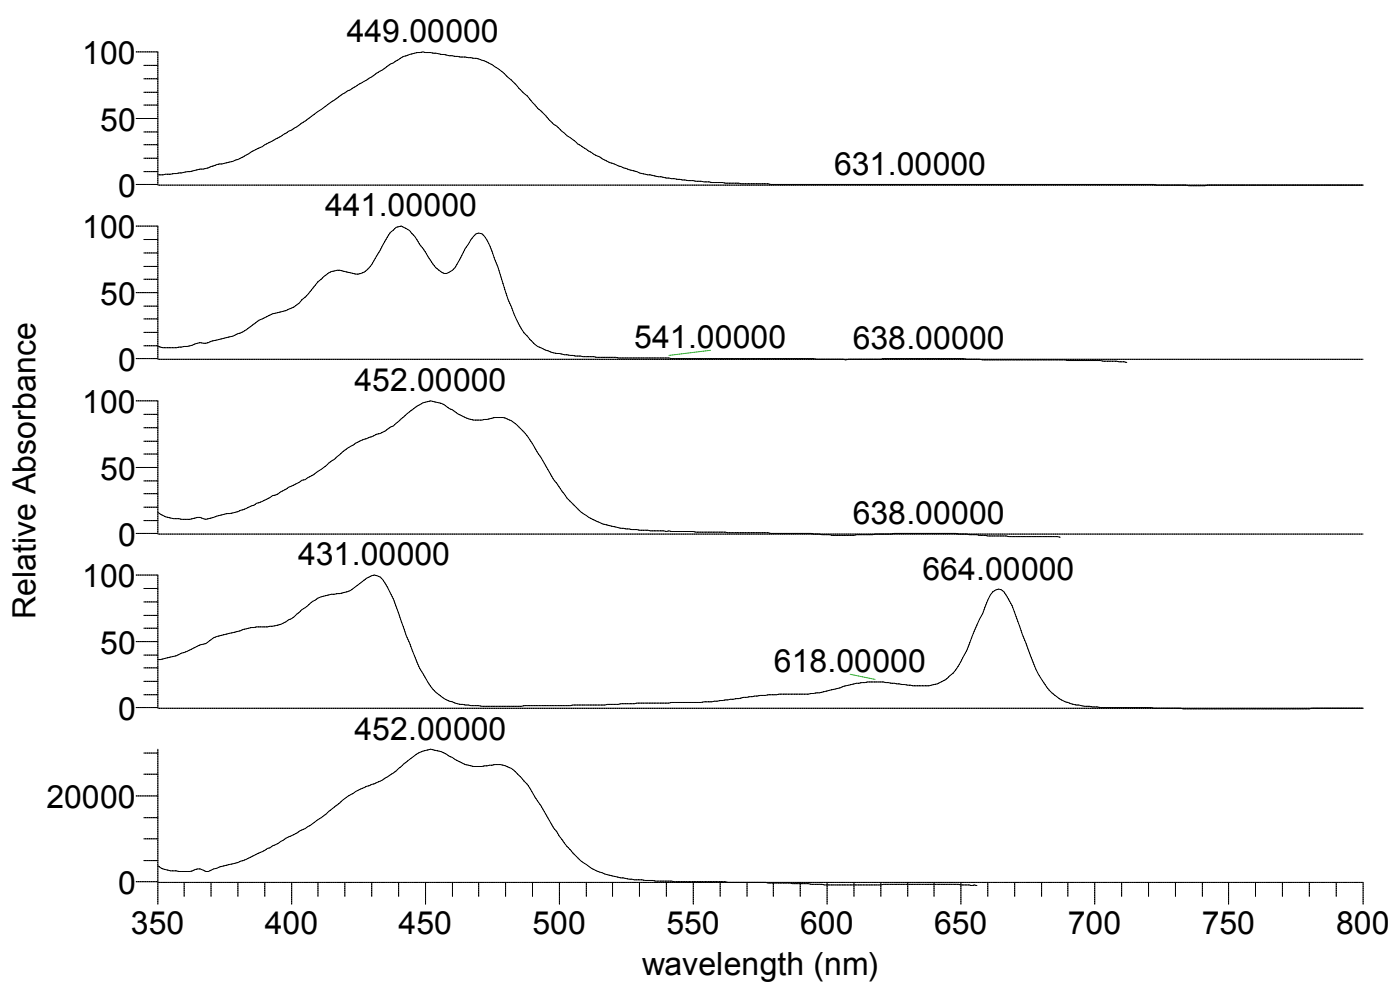NL:  
3.13E5  
15#6274 RT:  
20.91 AV: 1NL:  
3.53E4  
15#6569 RT:  
21.90 AV: 1NL:  
1.75E4  
15#7436 RT:  
24.79 AV: 1NL:  
3.88E5  
15#10962  
RT: 36.54  
AV: 1NL:  
3.08E4  
15#13219  
RT: 44.06  
AV: 1

Supplement: Data_Sheet_1.zip [file Muestra15_HPLC-UV.pdf › Carotenoids/Muestra15_HPLC-UV.pdf]

RT: 0.00 - 61.20

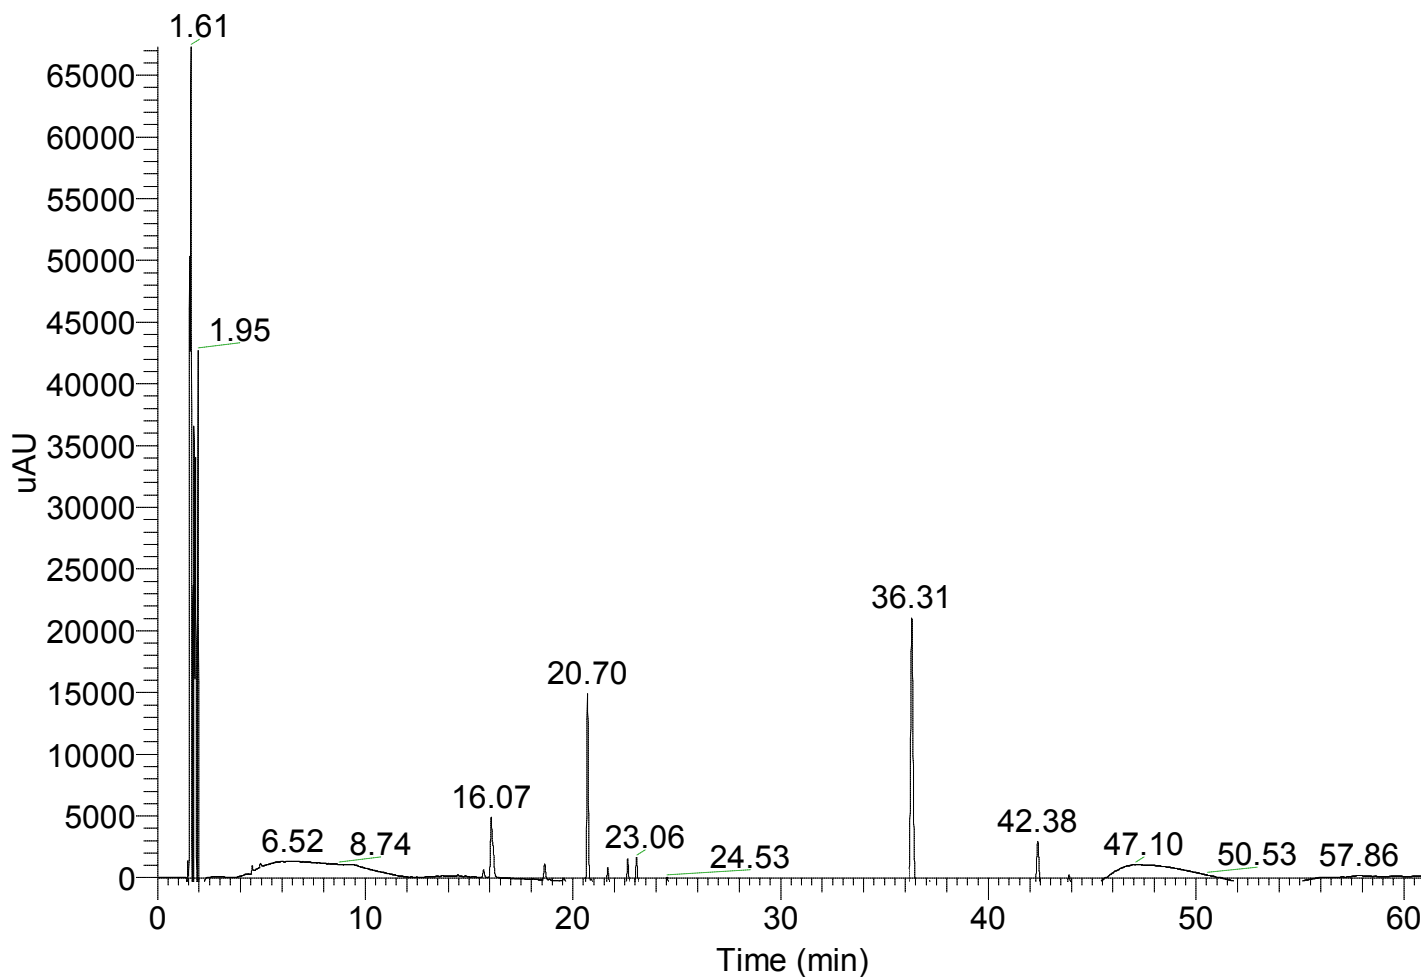

NL:  
6.73E4  
Total Scan  
PDA 16

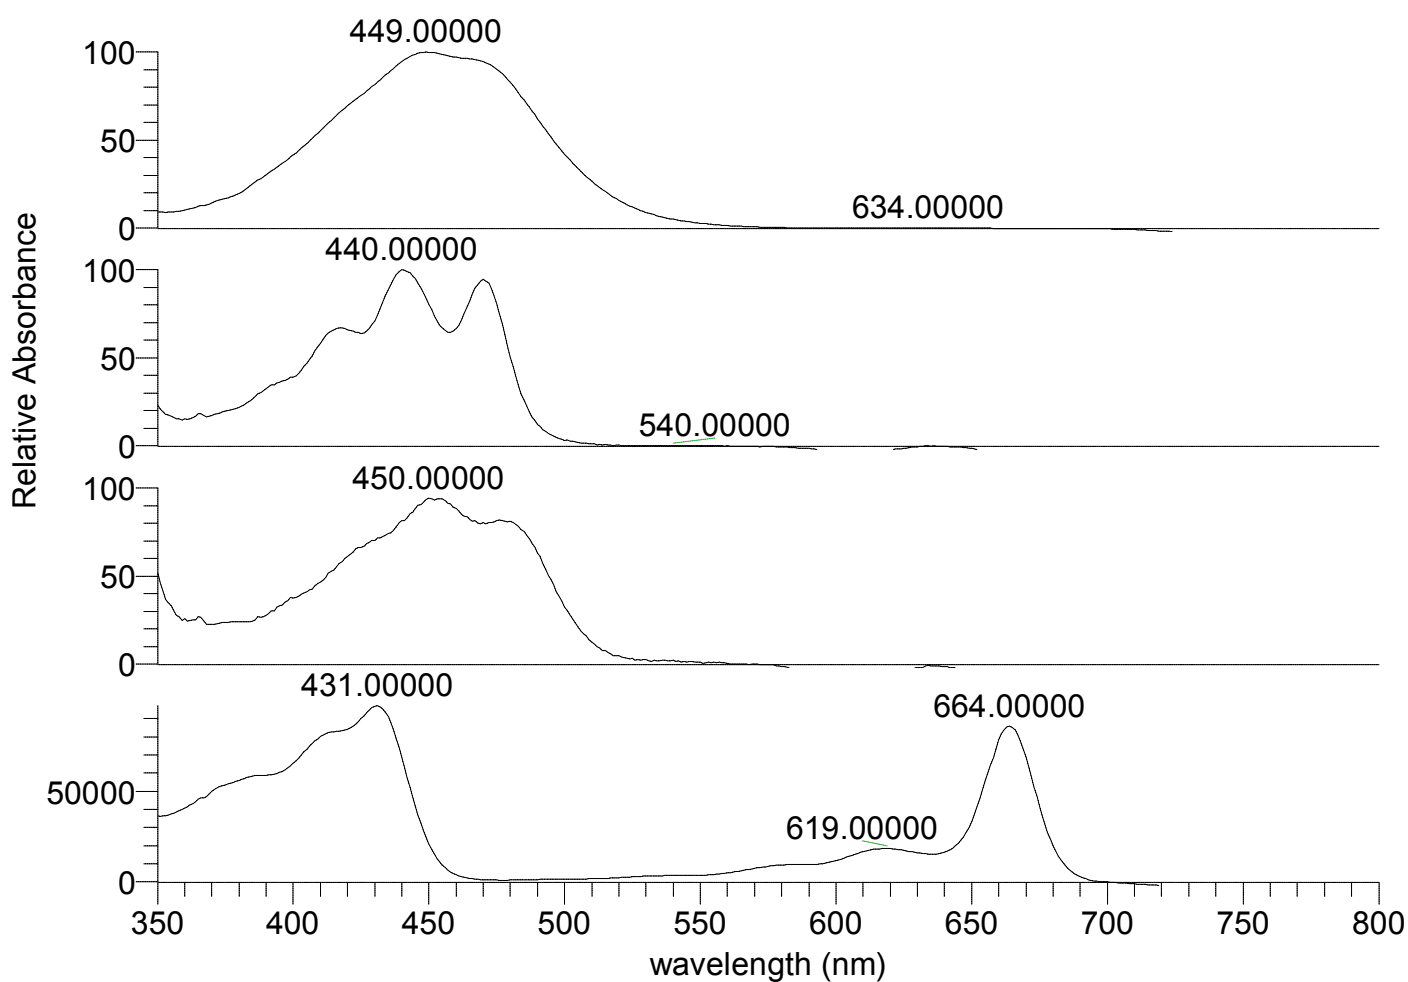

NL:  
7.22E4  
16#6211  
RT: 20.70  
AV: 1

NL:  
8.68E3  
16#6503  
RT: 21.68  
AV: 1

NL:  
3.60E3  
16#7360  
RT: 24.53  
AV: 1

NL:  
9.69E4  
16#10893  
RT: 36.31  
AV: 1

Supplement: Data_Sheet_1.zip [file Muestra16_HPLC-UV.pdf › Carotenoids/Muestra16_HPLC-UV.pdf]

RT: 0.00 - 61.20

NL:  
2.06E5  
Total Scan  
PDA 17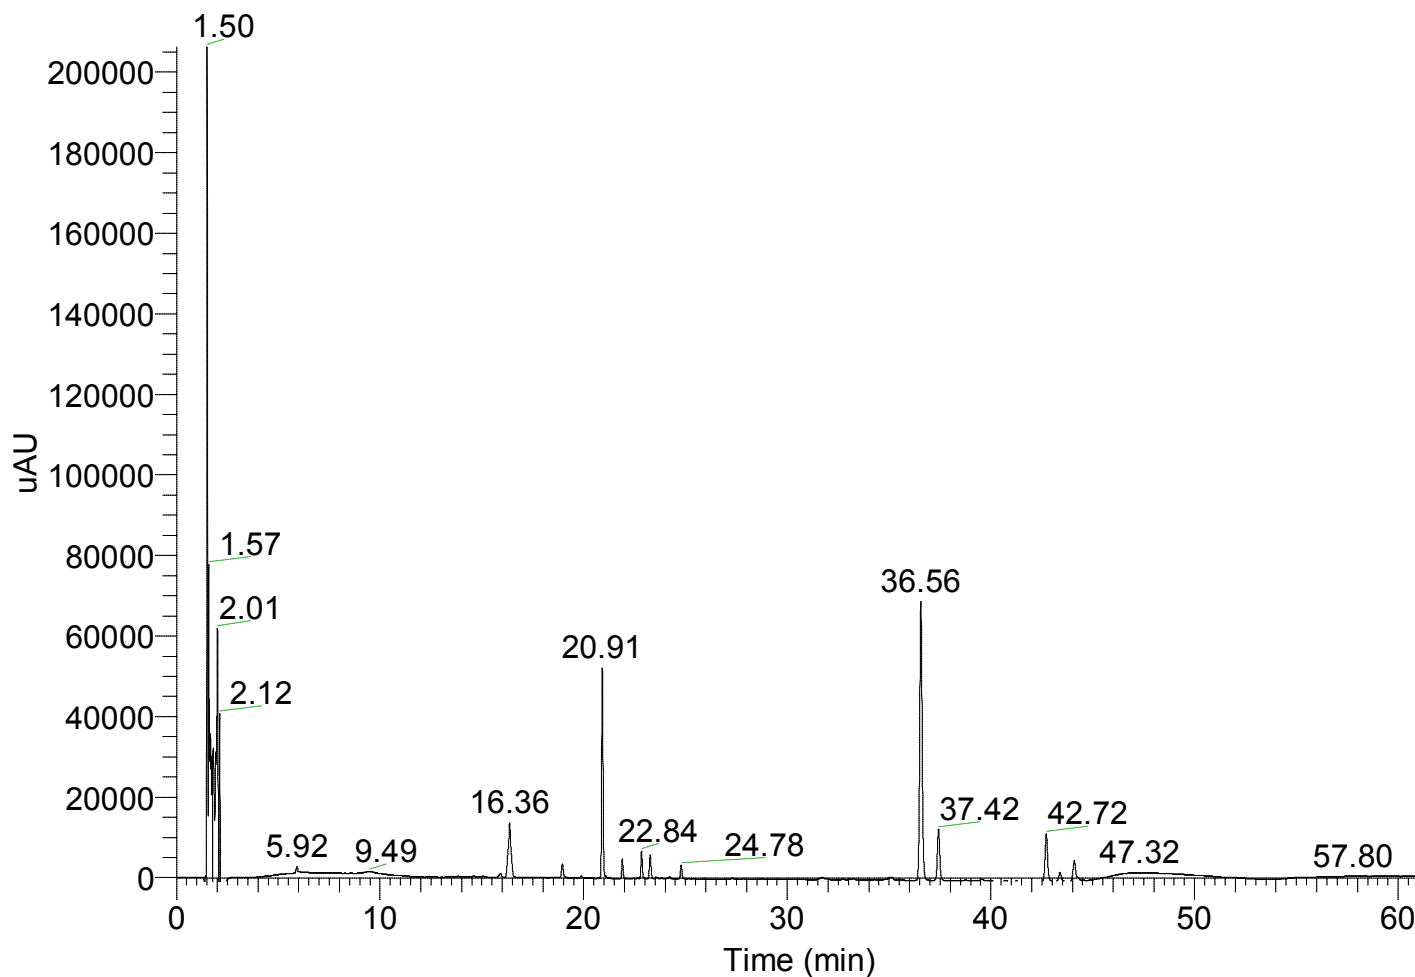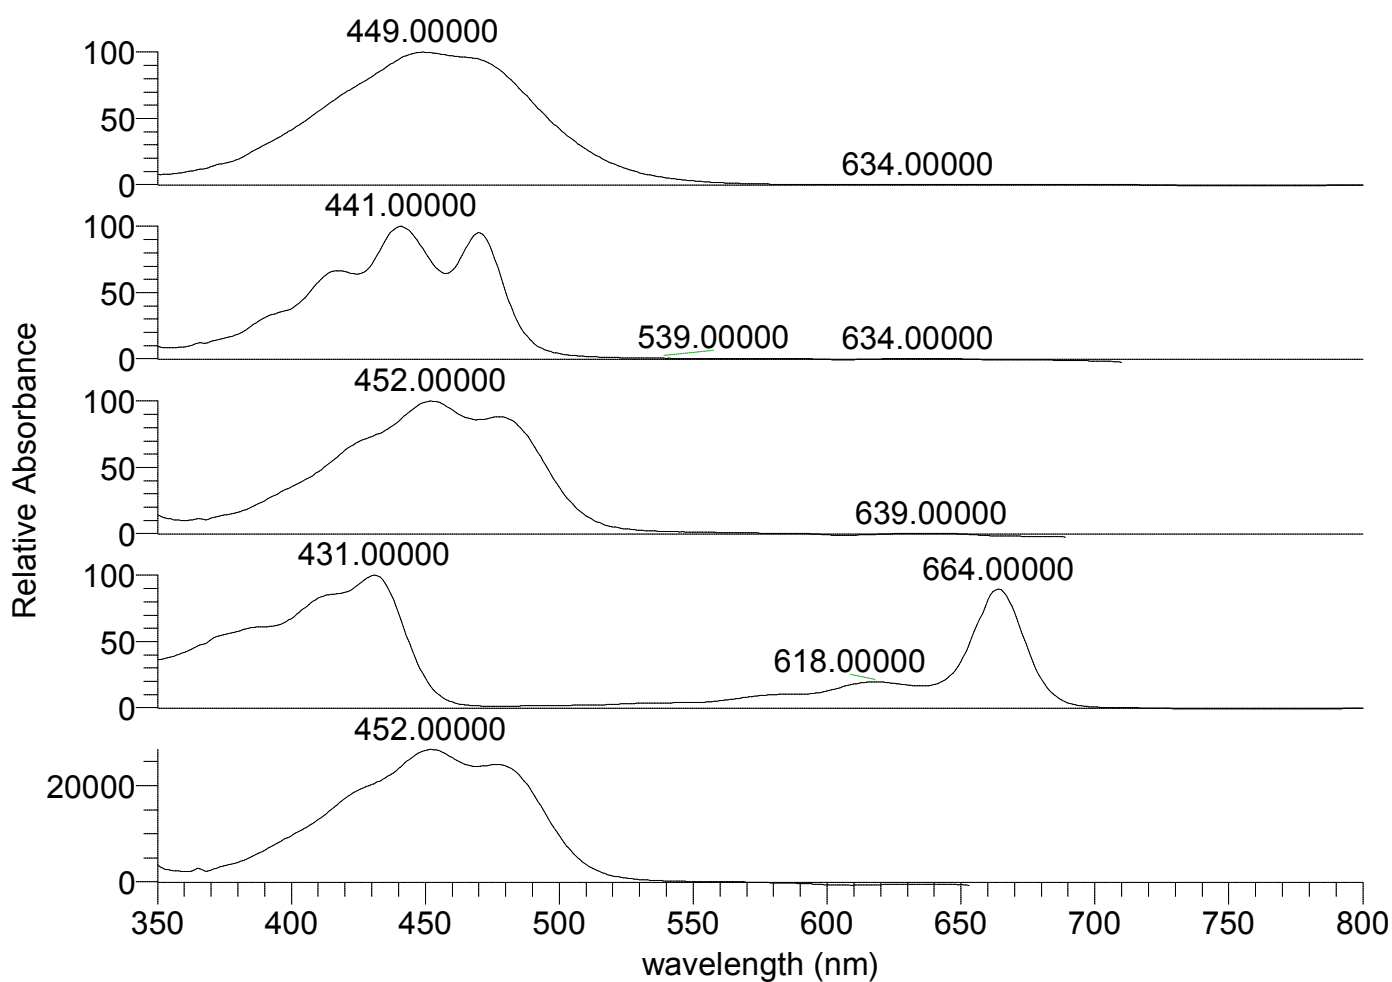NL:  
2.47E5  
17#6273 RT:  
20.91 AV: 1NL:  
3.24E4  
17#6568 RT:  
21.89 AV: 1NL:  
1.92E4  
17#7437 RT:  
24.79 AV: 1NL:  
3.05E5  
17#10968  
RT: 36.56  
AV: 1NL:  
2.75E4  
17#13228  
RT: 44.09  
AV: 1

Supplement: Data_Sheet_1.zip [file Muestra17_HPLC-UV.pdf › Carotenoids/Muestra17_HPLC-UV.pdf]

RT: 0.00 - 61.20

NL:  
2.10E5  
Total Scan  
PDA 19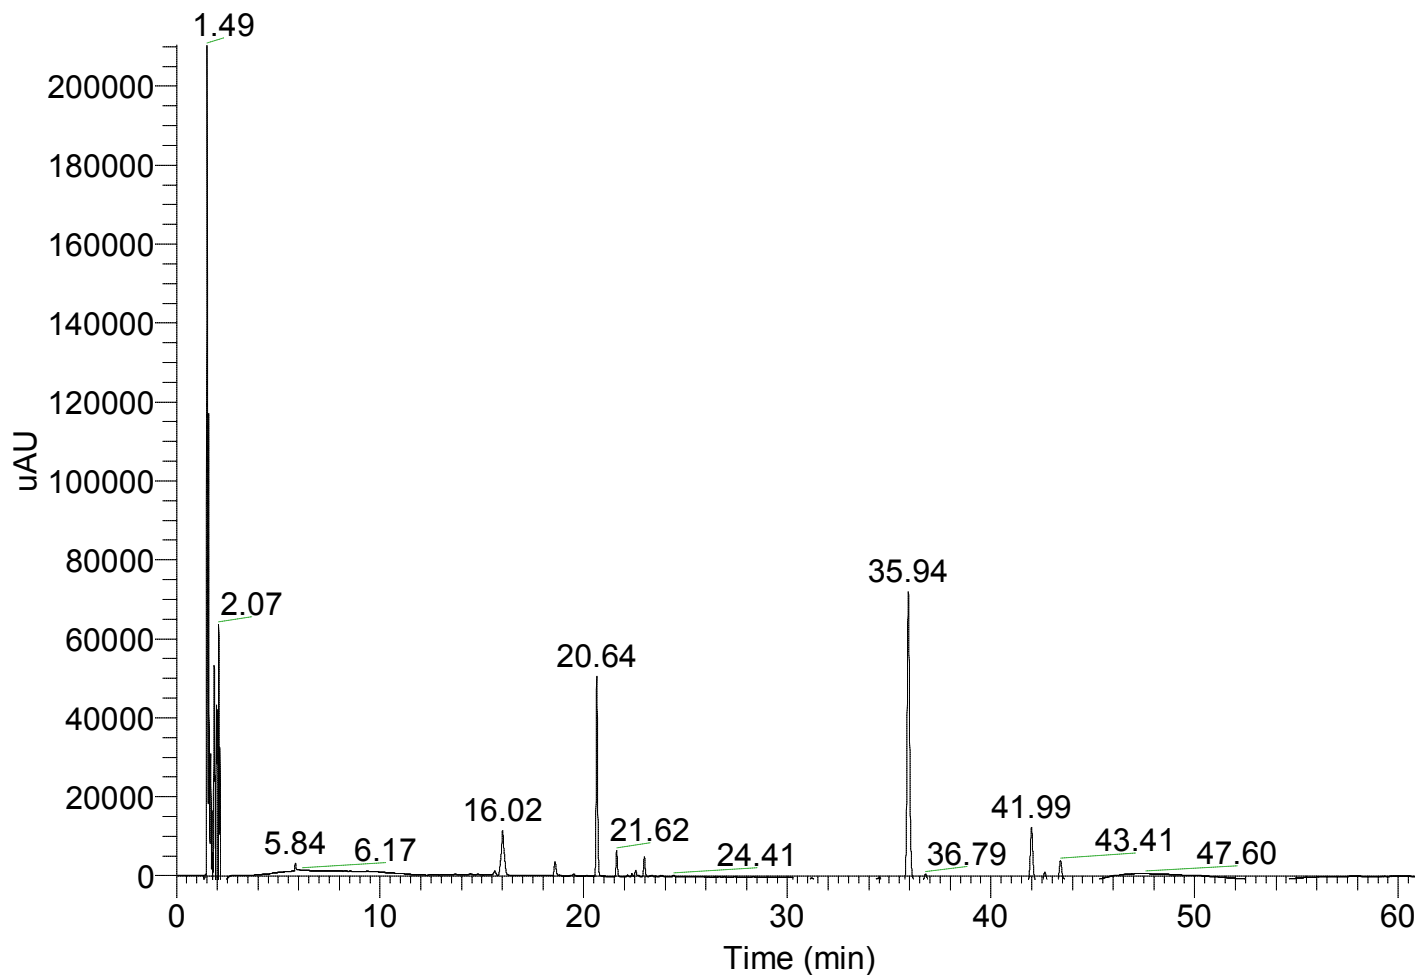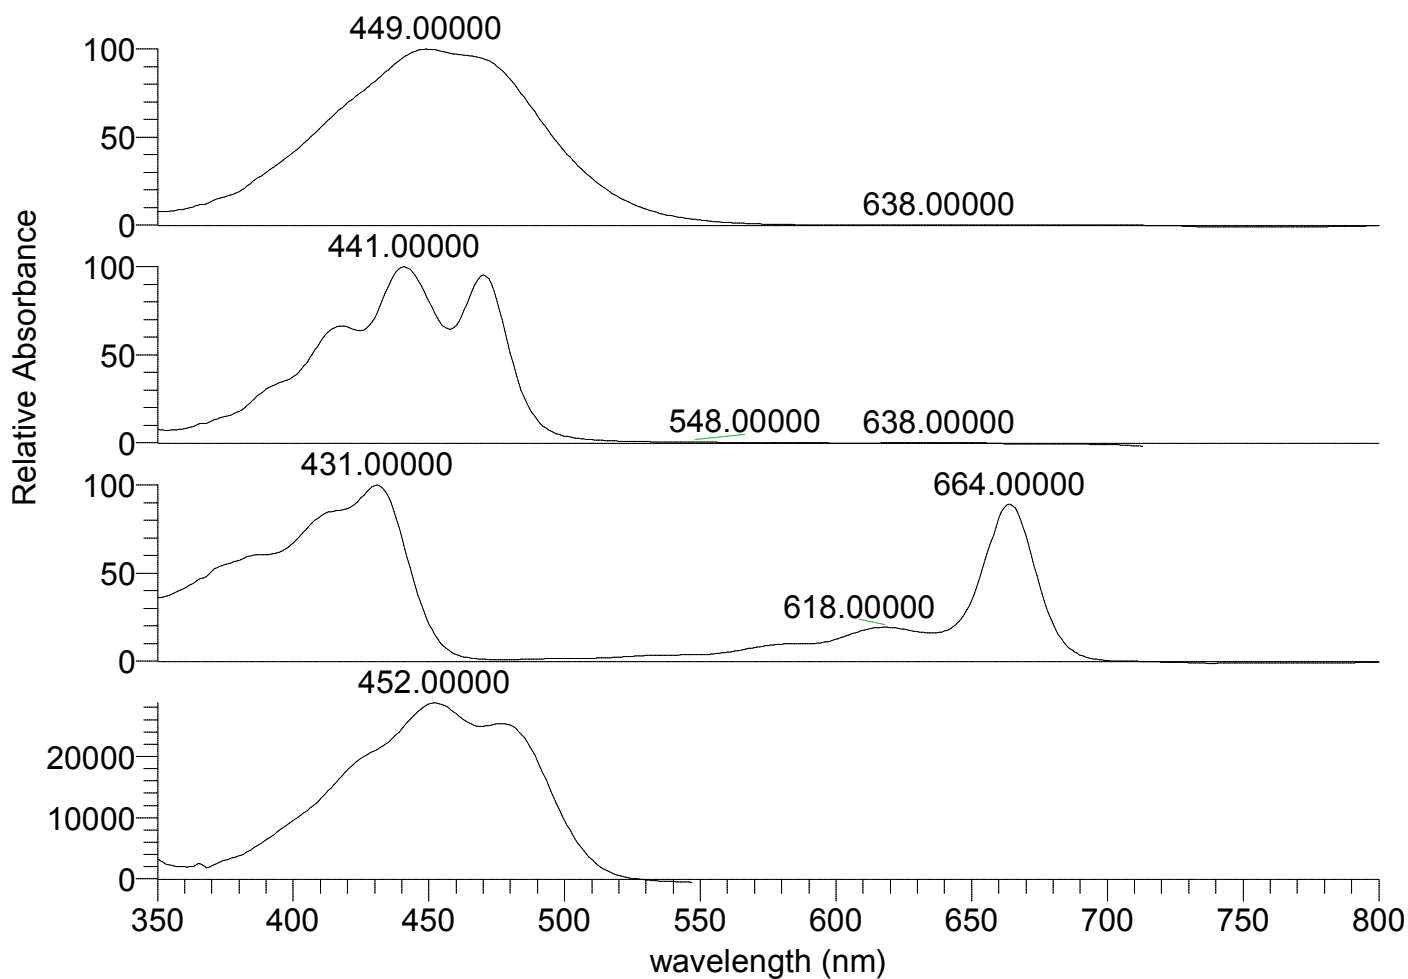NL:  
2.39E5  
19#6192  
RT: 20.64  
AV: 1NL:  
4.35E4  
19#6486  
RT: 21.62  
AV: 1NL:  
3.24E5  
19#10782  
RT: 35.94  
AV: 1NL:  
2.87E4  
19#13023  
RT: 43.41  
AV: 1

Supplement: Data_Sheet_1.zip [file Muestra19_HPLC-UV.pdf › Carotenoids/Muestra19_HPLC-UV.pdf]

RT: 0.00 - 61.23

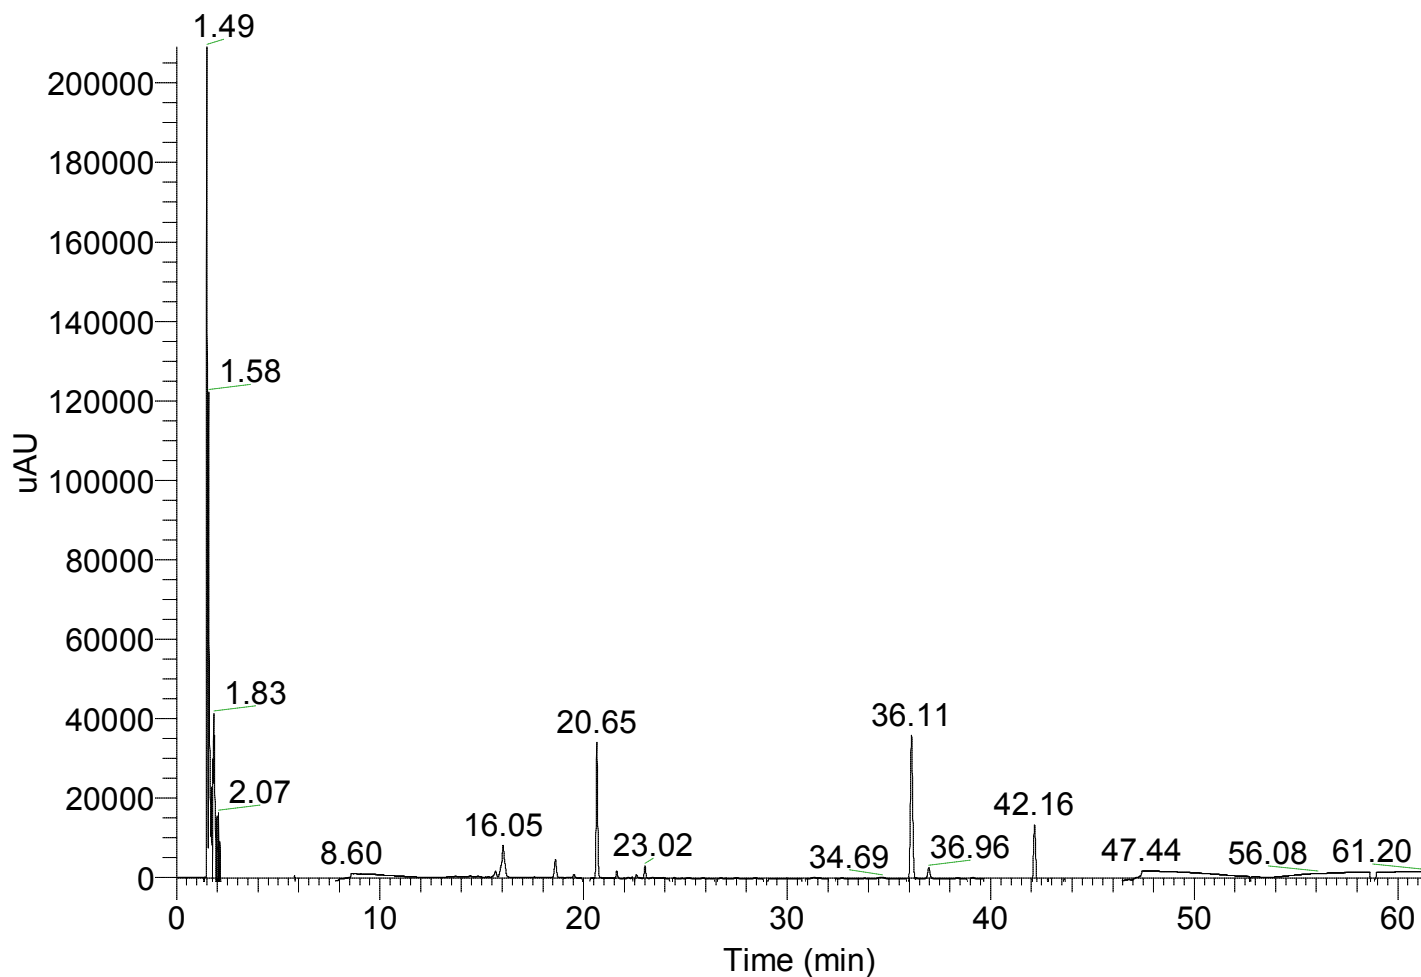

NL:  
2.09E5  
Total Scan  
PDA  
Muestra1re  
p

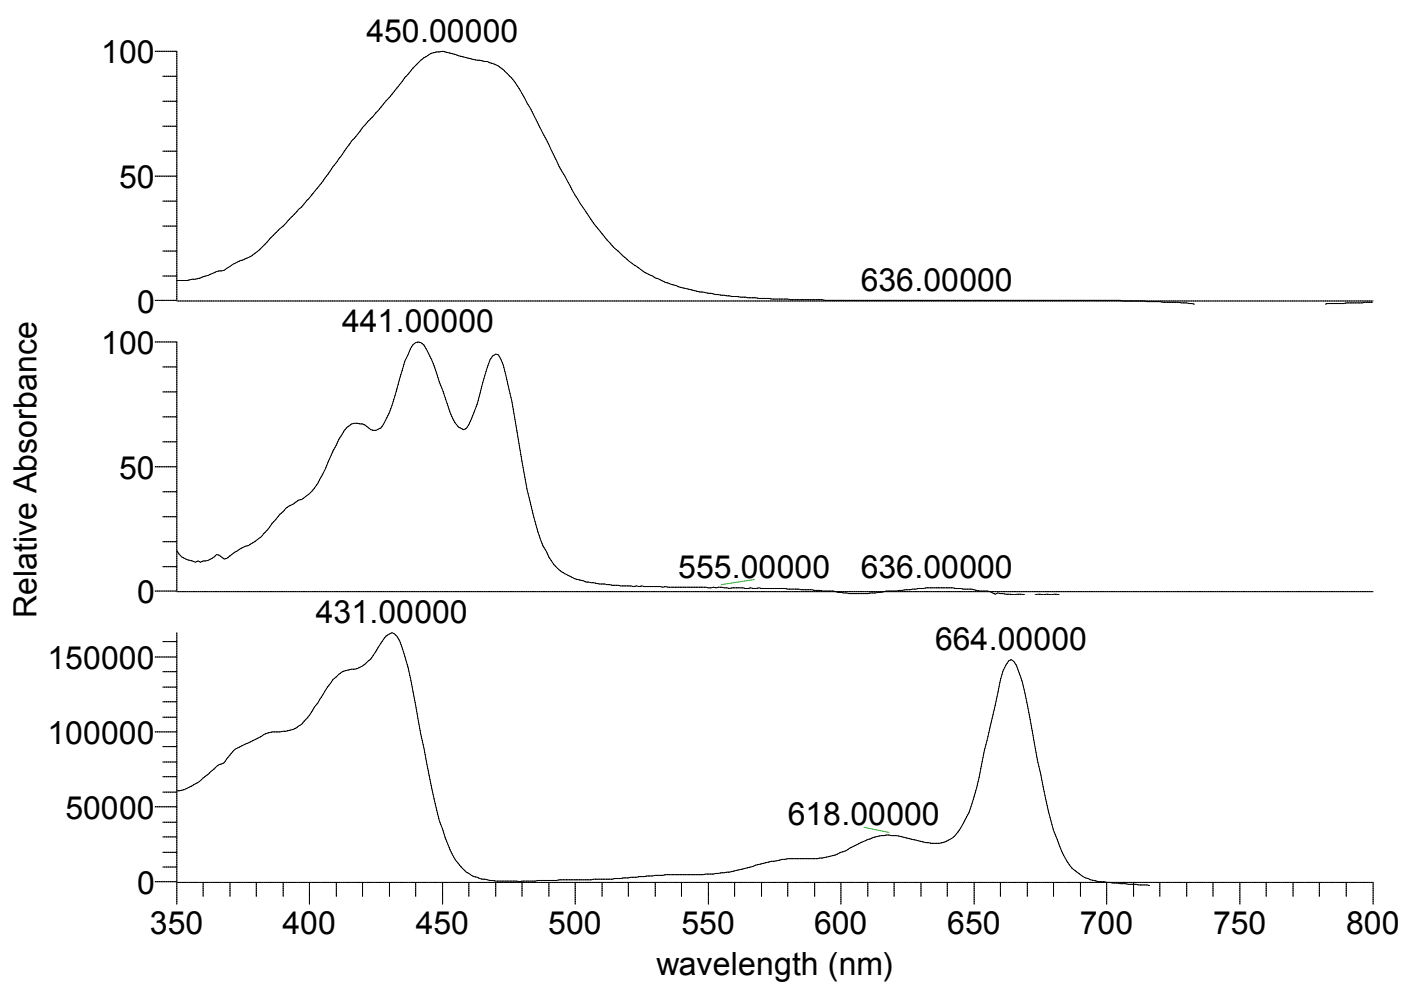

NL:  
1.59E5  
Muestra1rep  
#6194 RT:  
20.65 AV: 1

NL:  
1.37E4  
Muestra1rep  
#6488 RT:  
21.63 AV: 1

NL:  
1.66E5  
Muestra1rep  
#10833 RT:  
36.11 AV: 1

Supplement: Data_Sheet_1.zip [file Muestra1_HPLC-UV.pdf › Carotenoids/Muestra1_HPLC-UV.pdf]

RT: 0.00 - 61.20

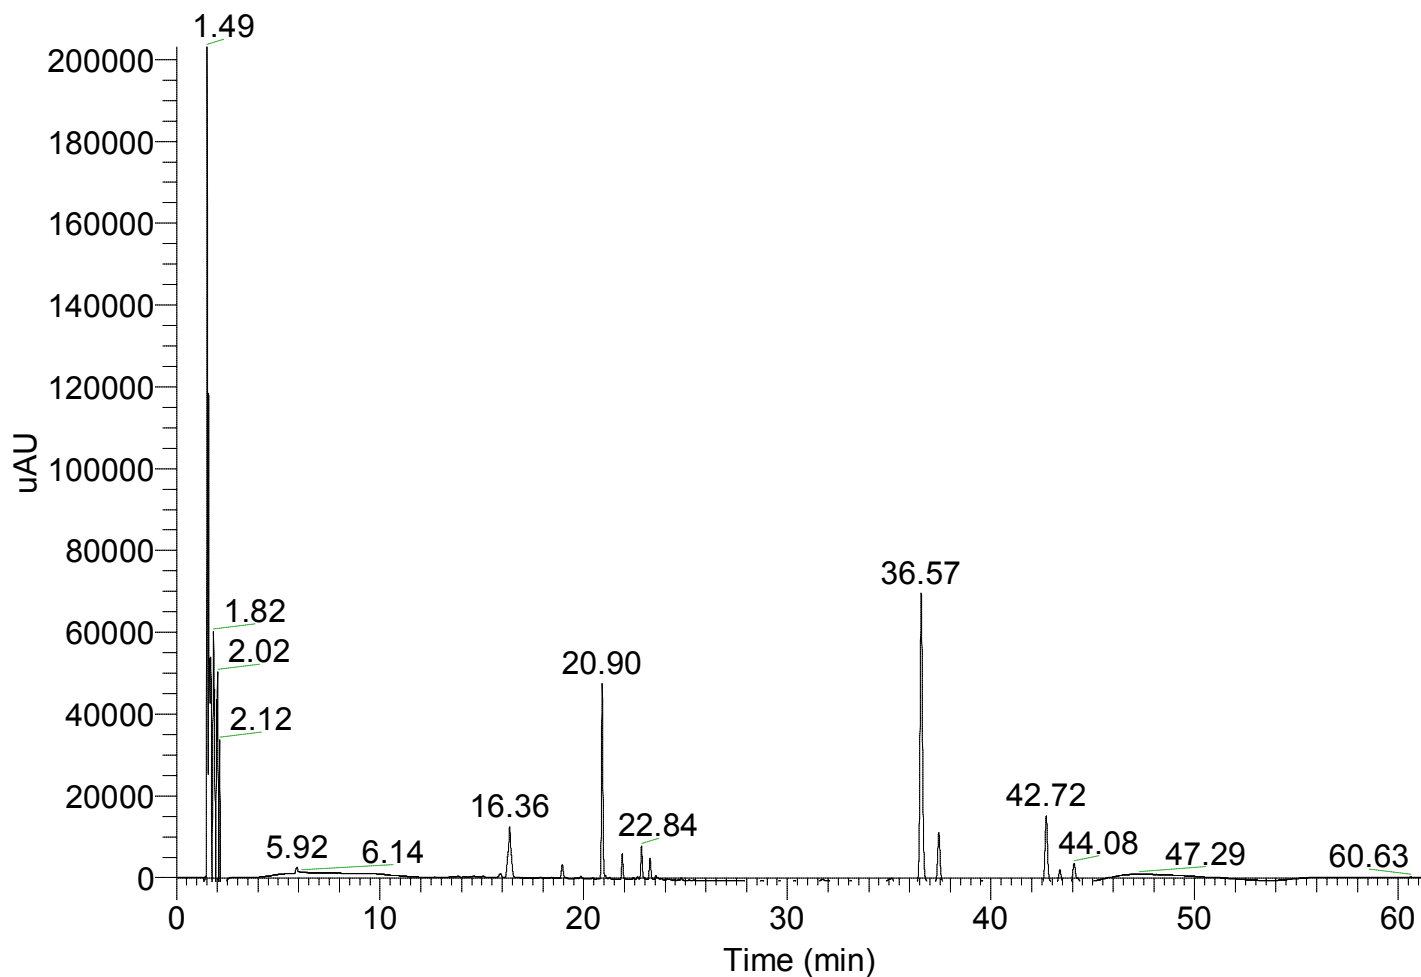

NL:  
2.03E5  
Total Scan  
PDA 20

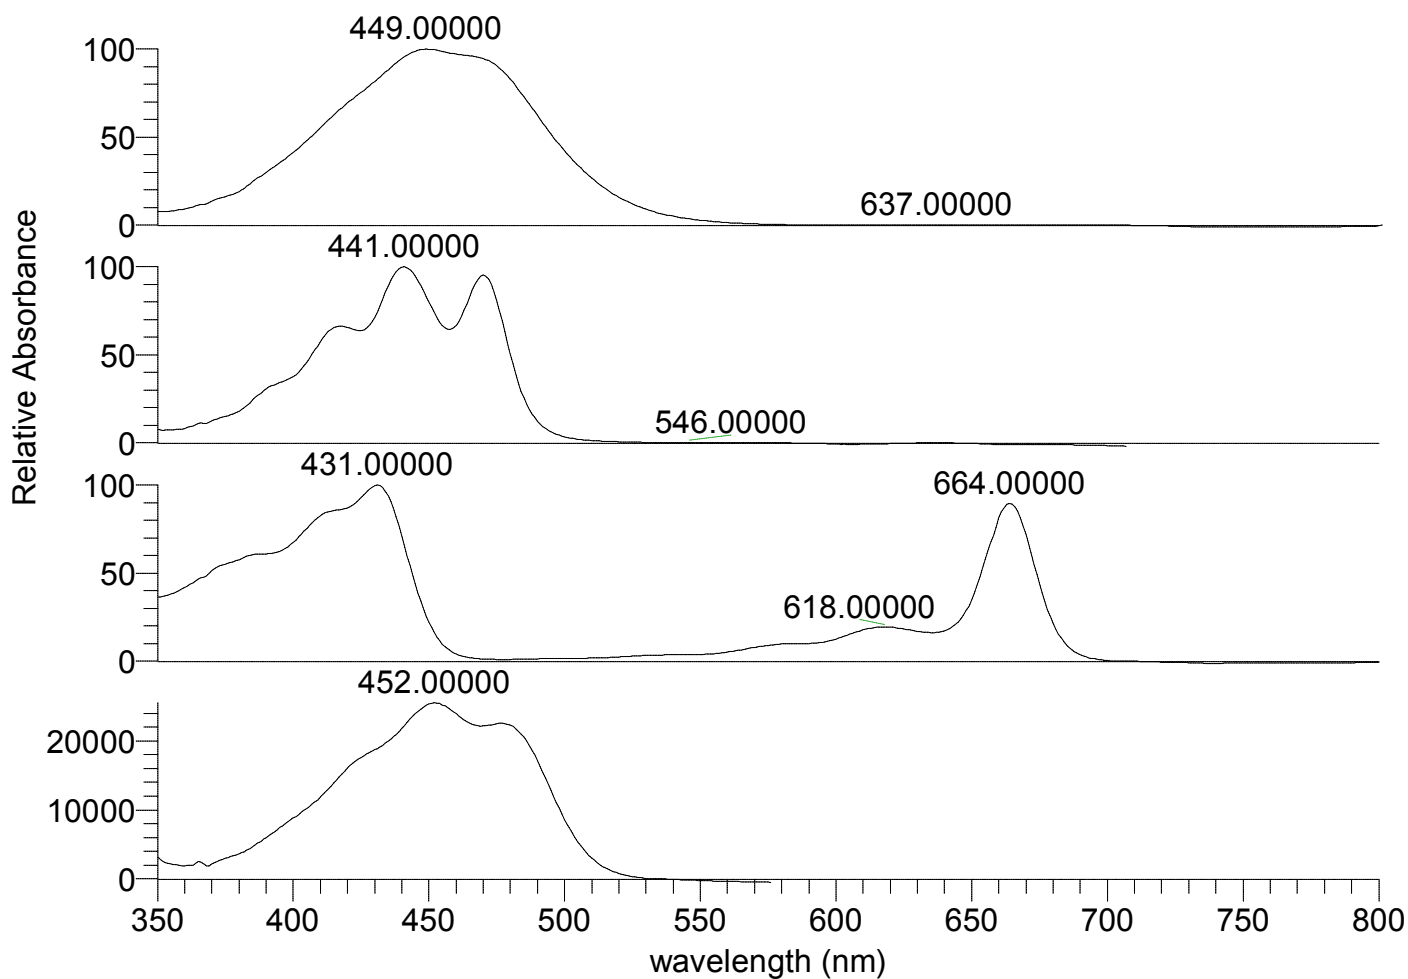

NL:  
2.23E5  
20#6270  
RT: 20.90  
AV: 1

NL:  
4.09E4  
20#6568  
RT: 21.89  
AV: 1

NL:  
3.10E5  
20#10971  
RT: 36.57  
AV: 1

NL:  
2.55E4  
20#13224  
RT: 44.08  
AV: 1

Supplement: Data_Sheet_1.zip [file Muestra20_HPLC-UV.pdf › Carotenoids/Muestra20_HPLC-UV.pdf]

RT: 0.00 - 61.20

NL:  
2.06E5  
Total Scan  
PDA 21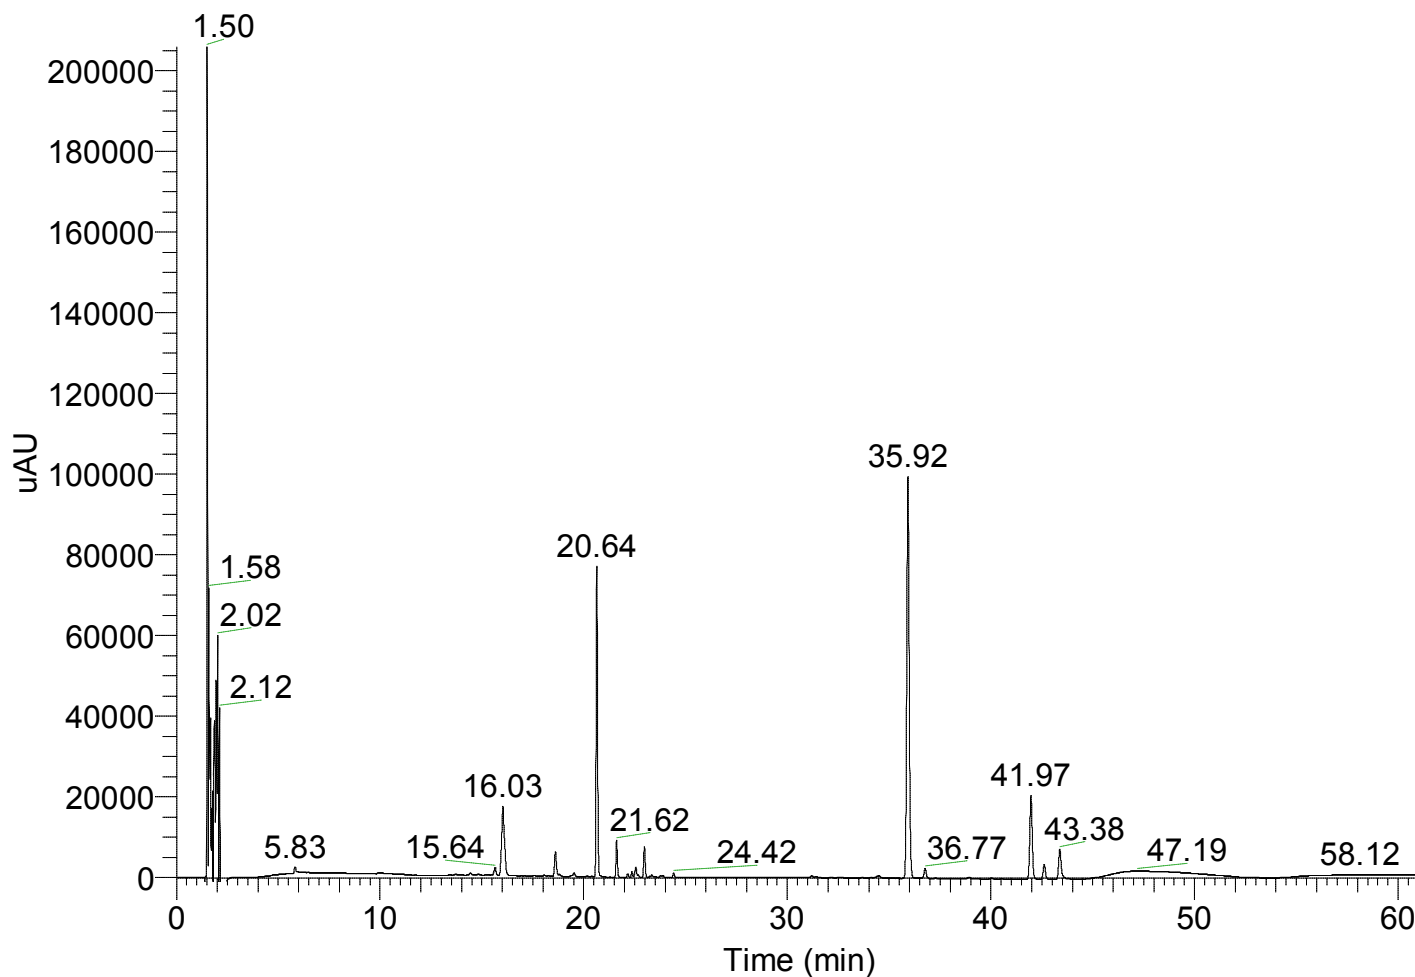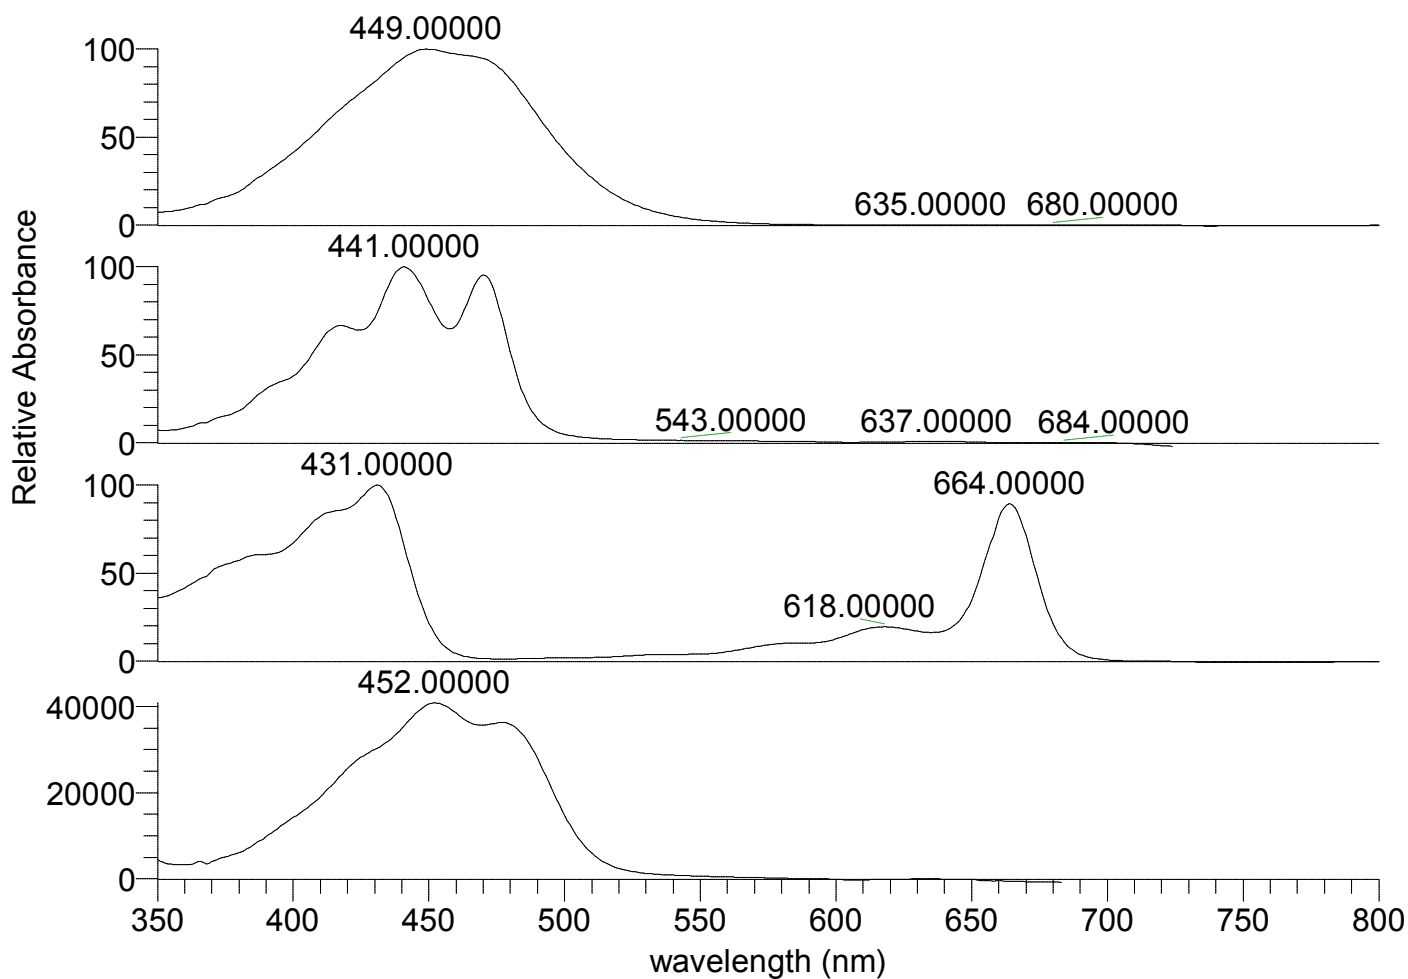

Supplement: Data_Sheet_1.zip [file Muestra21_HPLC-UV.pdf › Carotenoids/Muestra21_HPLC-UV.pdf]

RT: 0.00 - 61.20

NL:  
2.09E5  
Total Scan  
PDA 22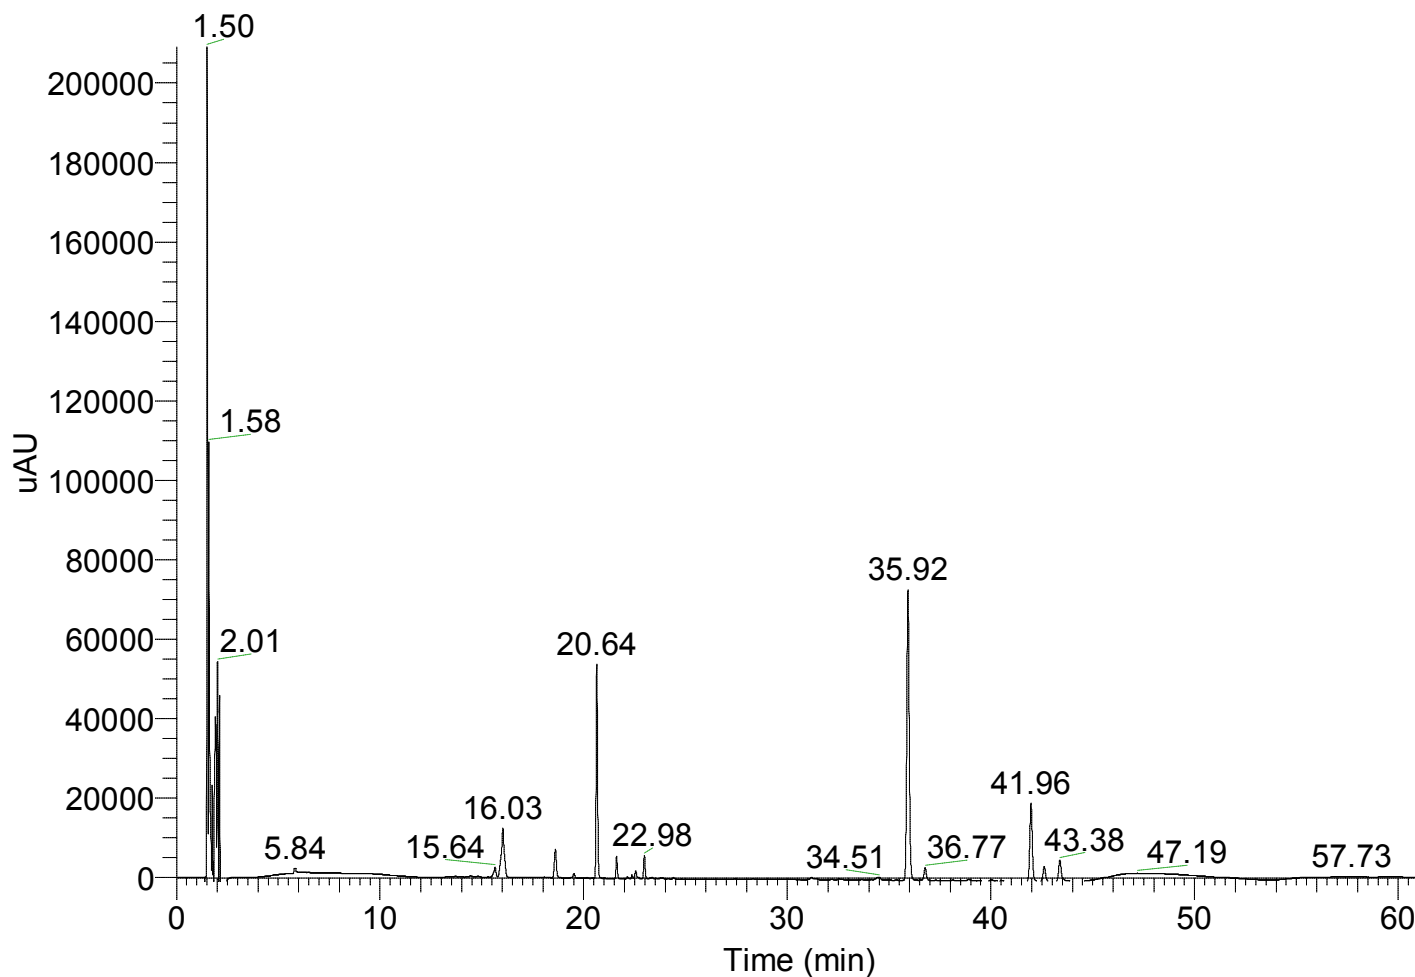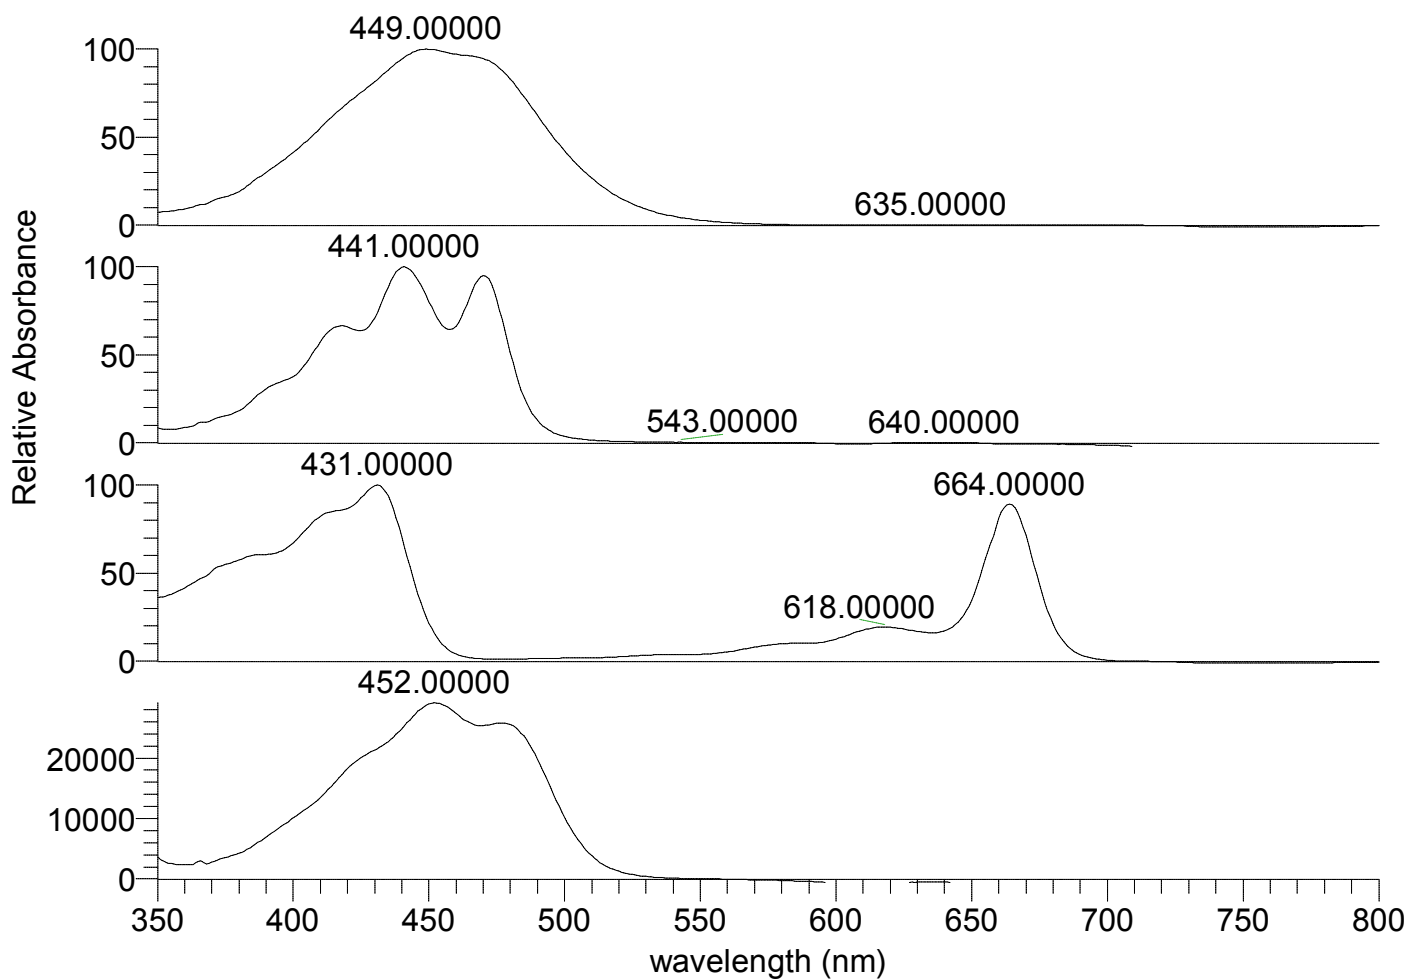

Supplement: Data_Sheet_1.zip [file Muestra22_HPLC-UV.pdf › Carotenoids/Muestra22_HPLC-UV.pdf]

RT: 13.17 - 51.89

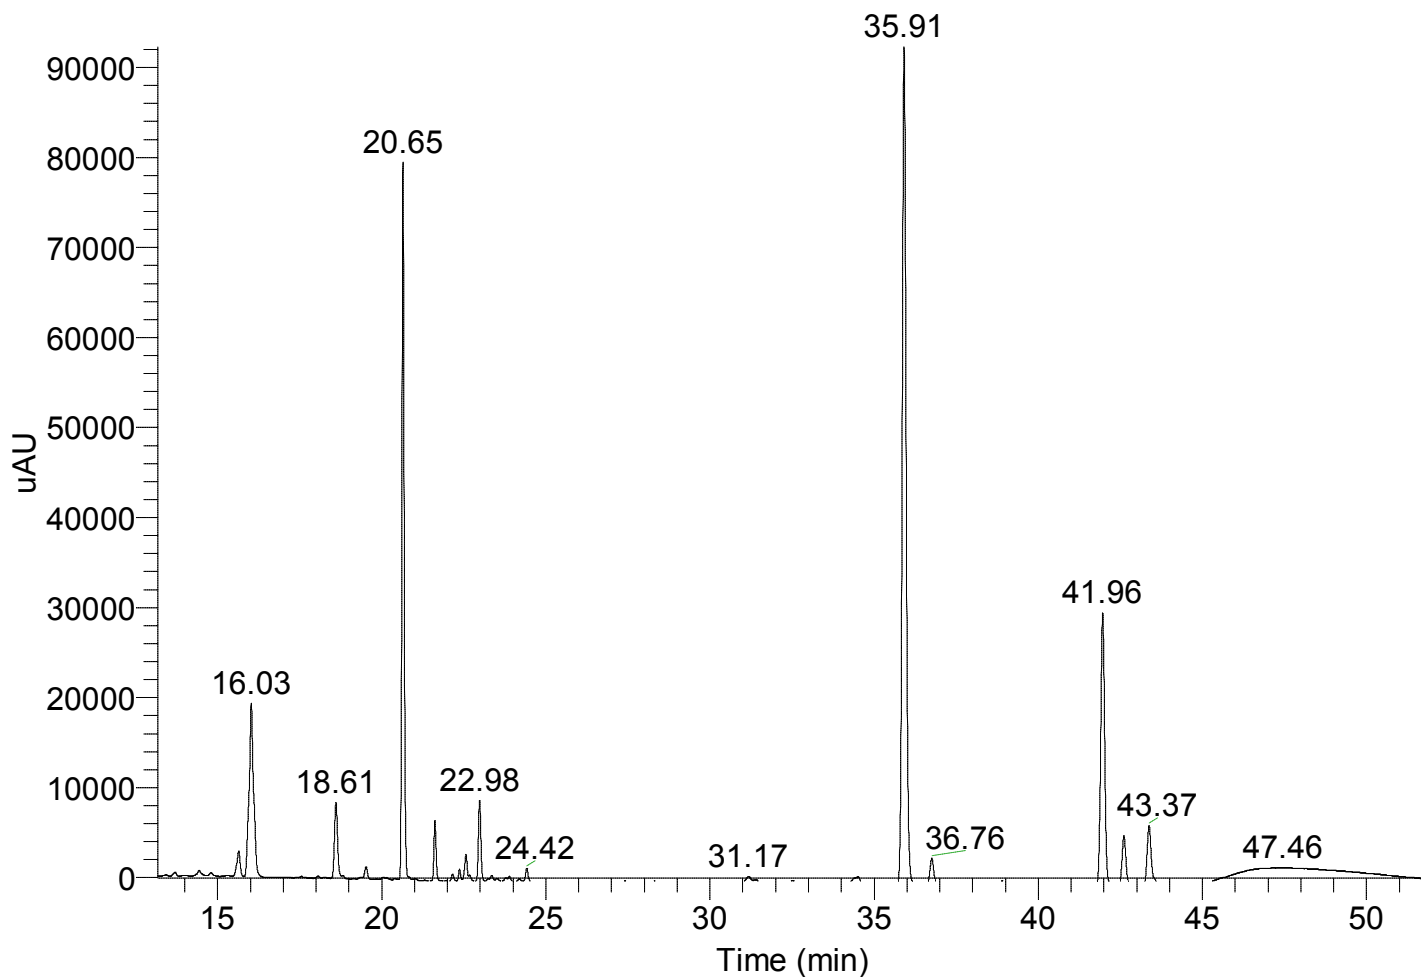

NL:  
9.22E4  
Total Scan  
PDA 23

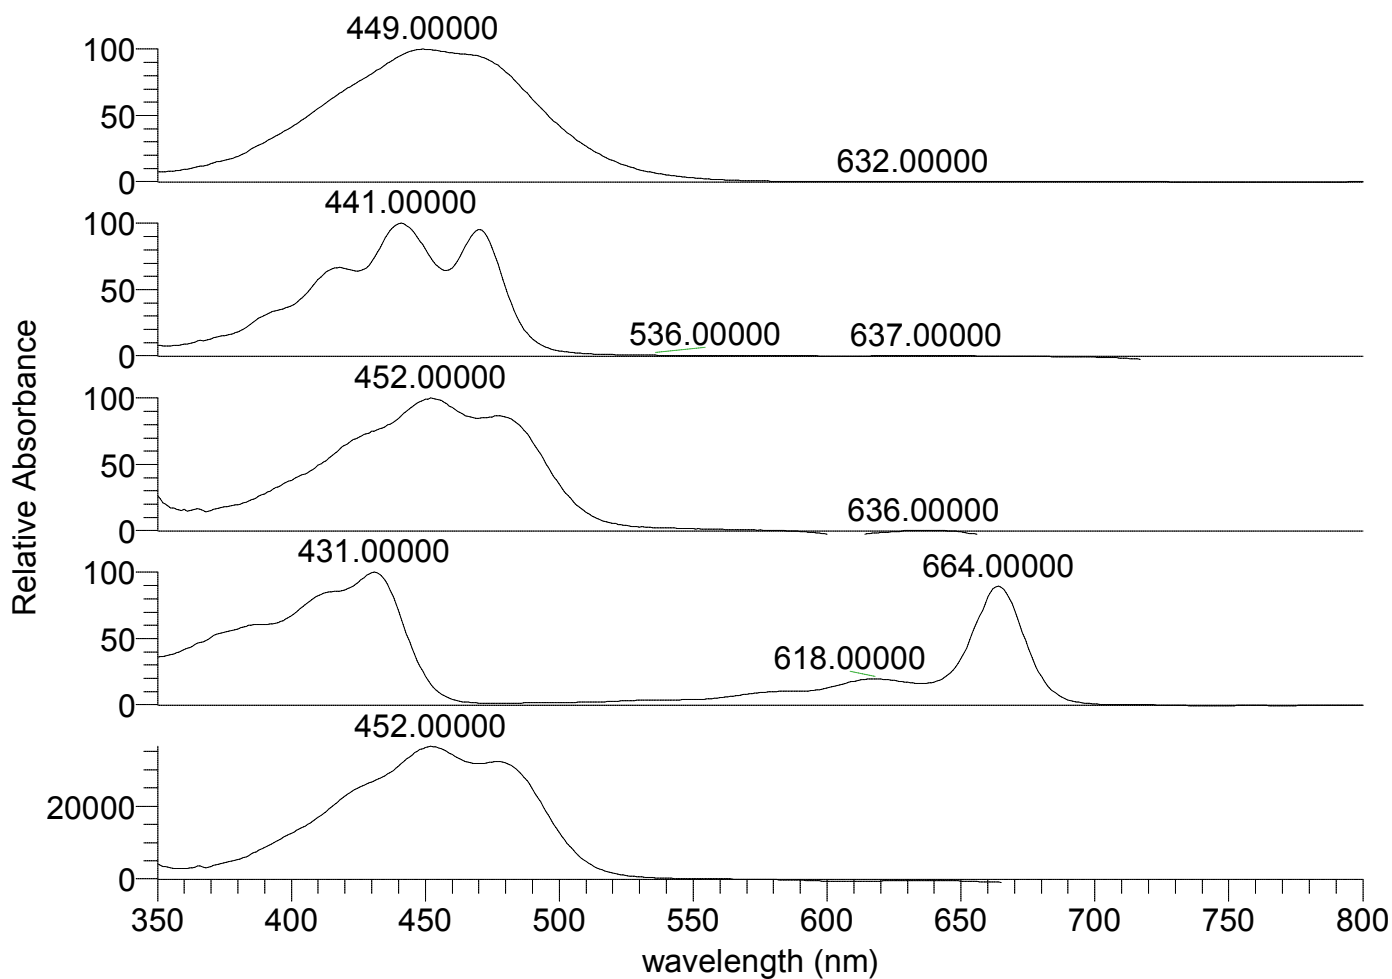

NL:  
3.73E5  
23#6195 RT:  
20.65 AV: 1

NL:  
4.35E4  
23#6486 RT:  
21.62 AV: 1

NL:  
8.57E3  
23#7327 RT:  
24.42 AV: 1

NL:  
4.11E5  
23#10773  
RT: 35.91  
AV: 1

NL:  
3.64E4  
23#13011  
RT: 43.37  
AV: 1

Supplement: Data_Sheet_1.zip [file Muestra23_HPLC-UV.pdf › Carotenoids/Muestra23_HPLC-UV.pdf]

RT: 0.00 - 61.20

NL:  
2.05E5  
Total Scan  
PDA 24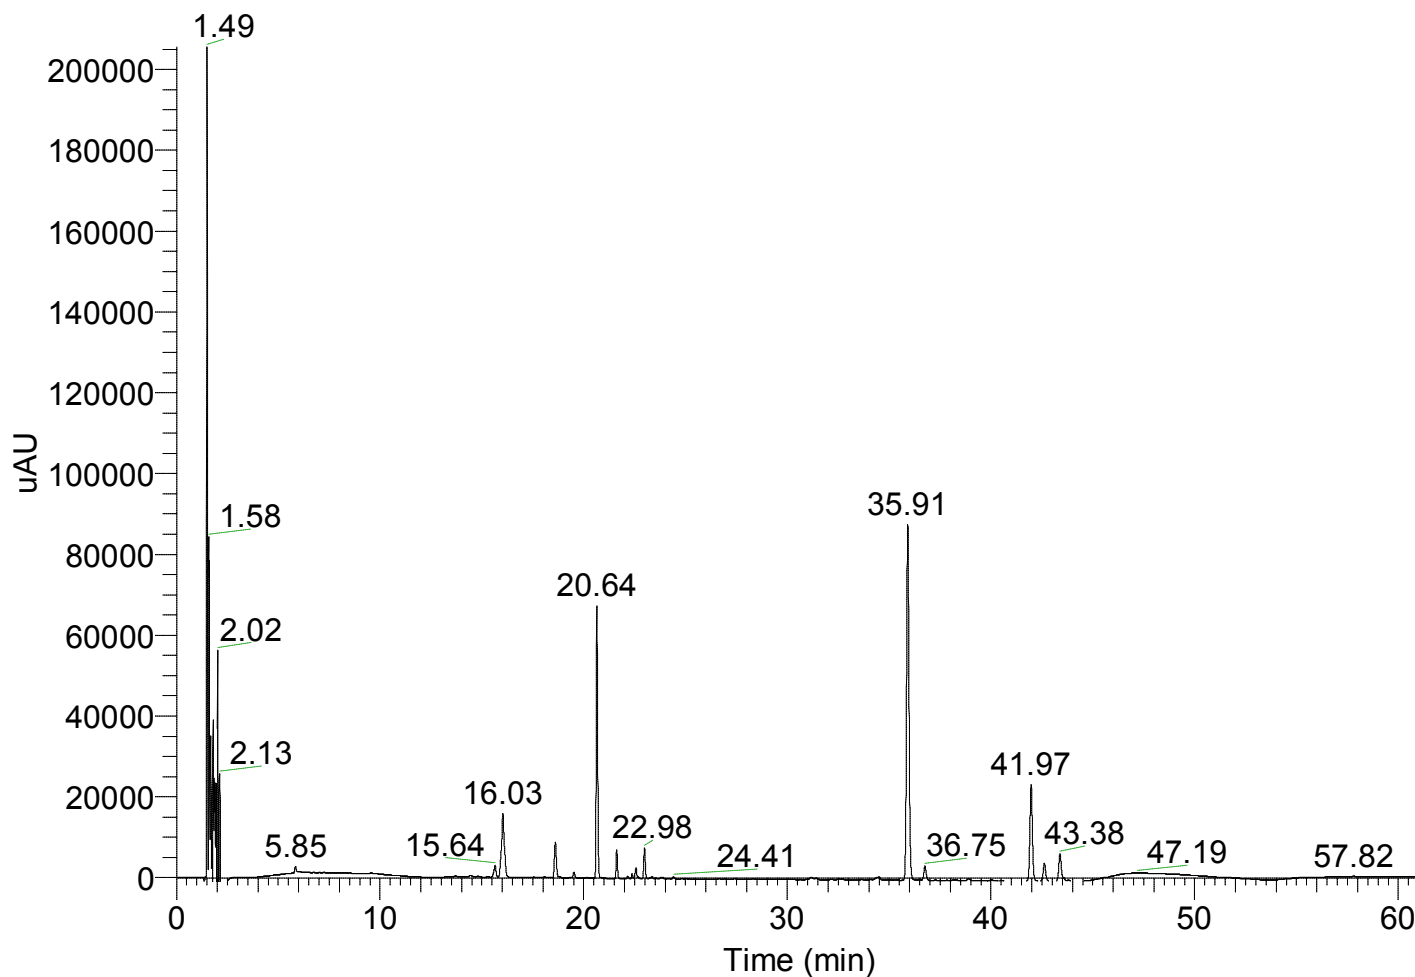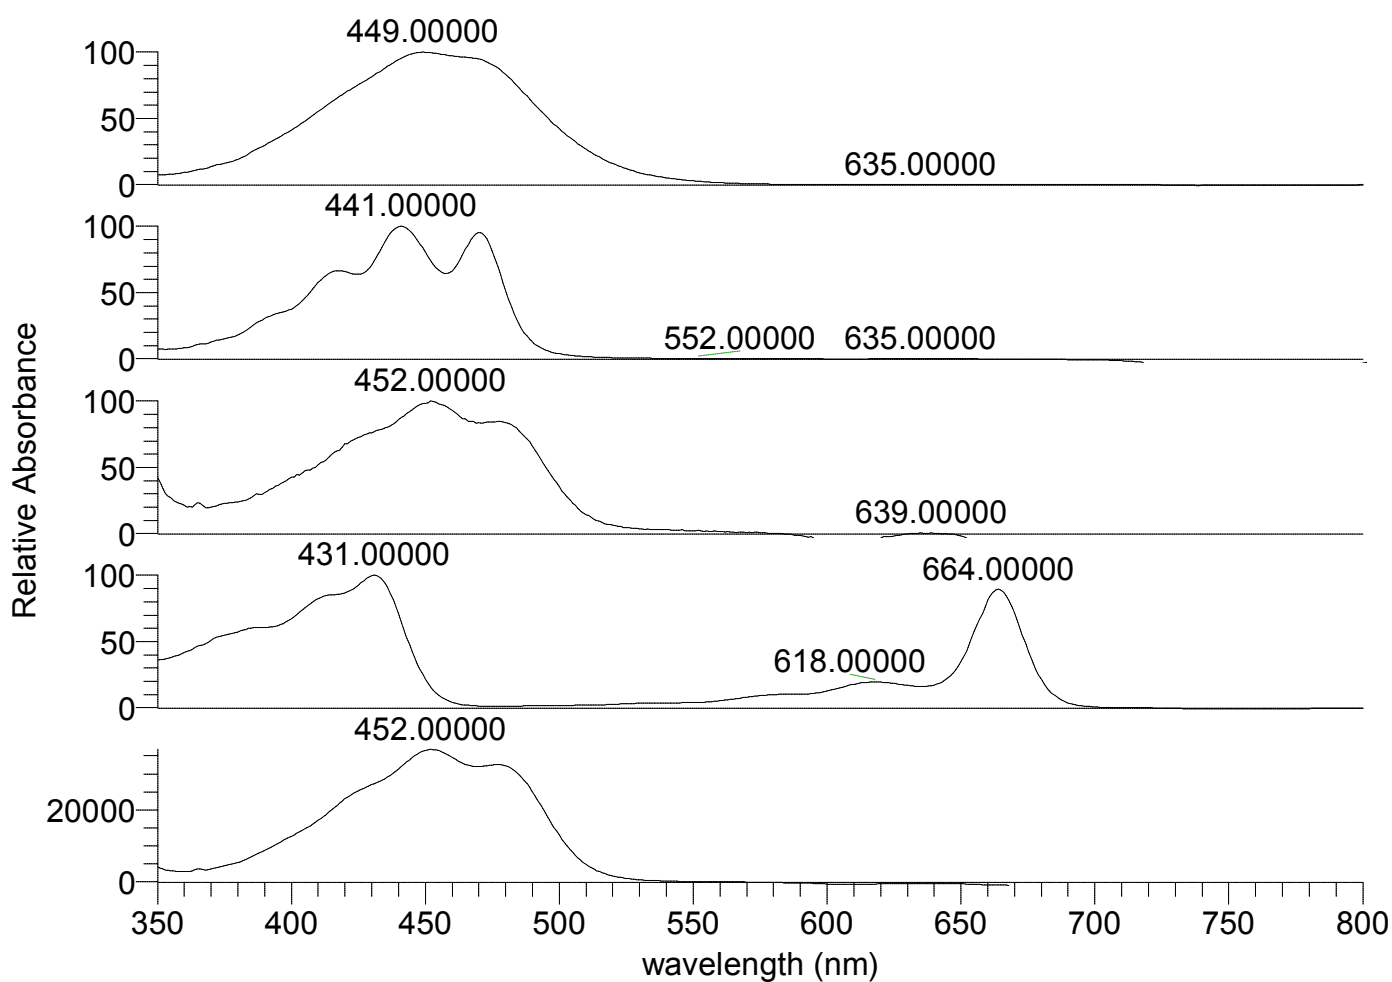NL:  
3.16E5  
24#6192 RT:  
20.64 AV: 1NL:  
4.73E4  
24#6485 RT:  
21.62 AV: 1NL:  
4.58E3  
24#7322 RT:  
24.41 AV: 1NL:  
3.89E5  
24#10773  
RT: 35.91  
AV: 1NL:  
3.68E4  
24#13015  
RT: 43.38  
AV: 1

Supplement: Data_Sheet_1.zip [file Muestra24_HPLC-UV.pdf › Carotenoids/Muestra24_HPLC-UV.pdf]

RT: 0.00 - 61.20

NL:  
2.07E5  
Total Scan  
PDA 25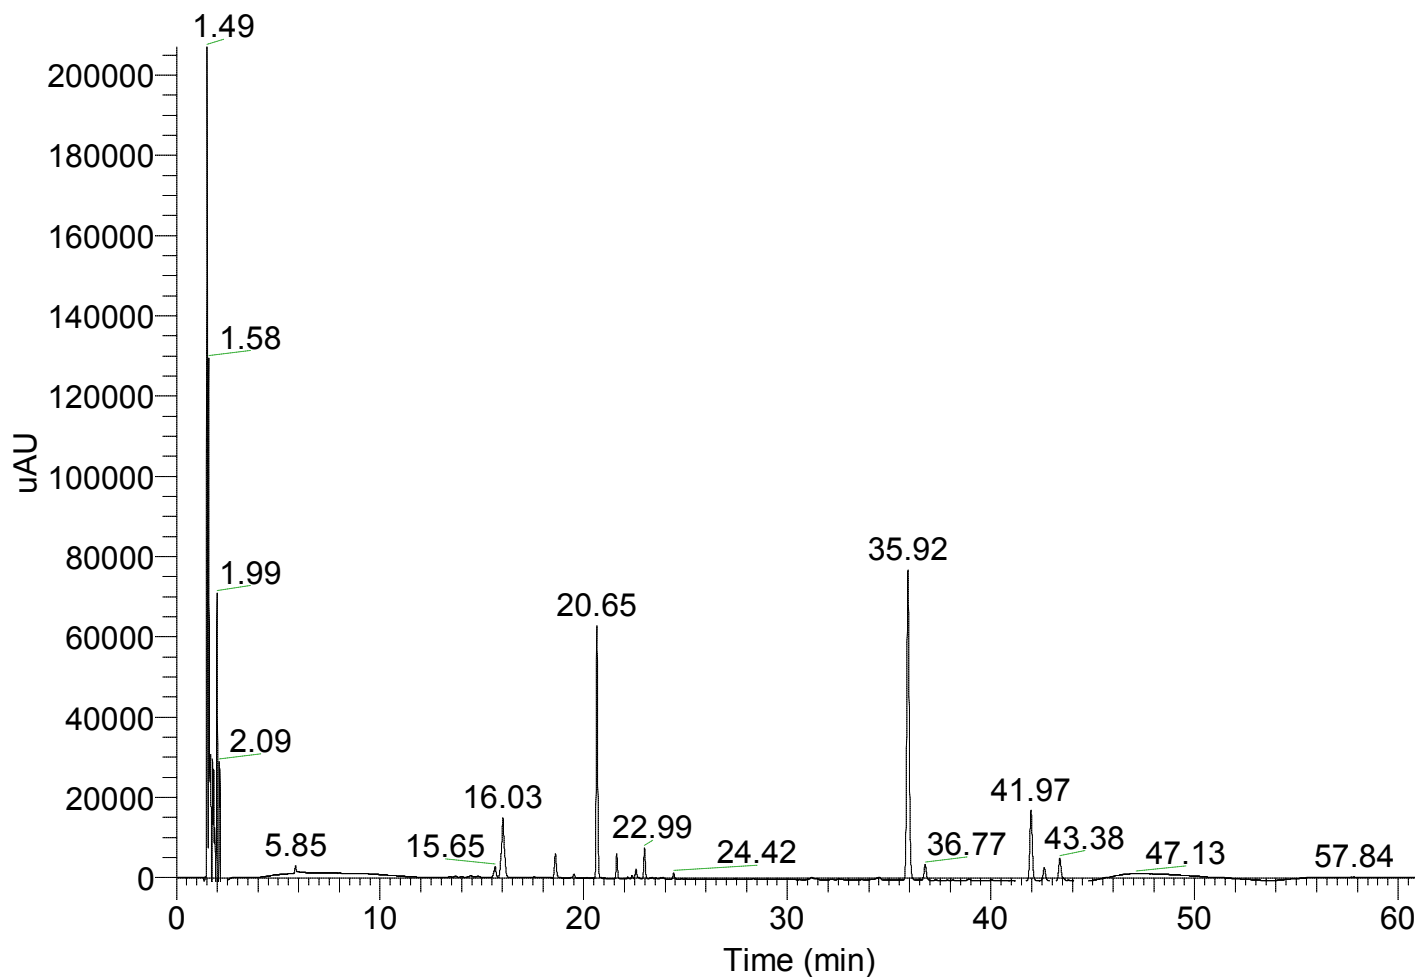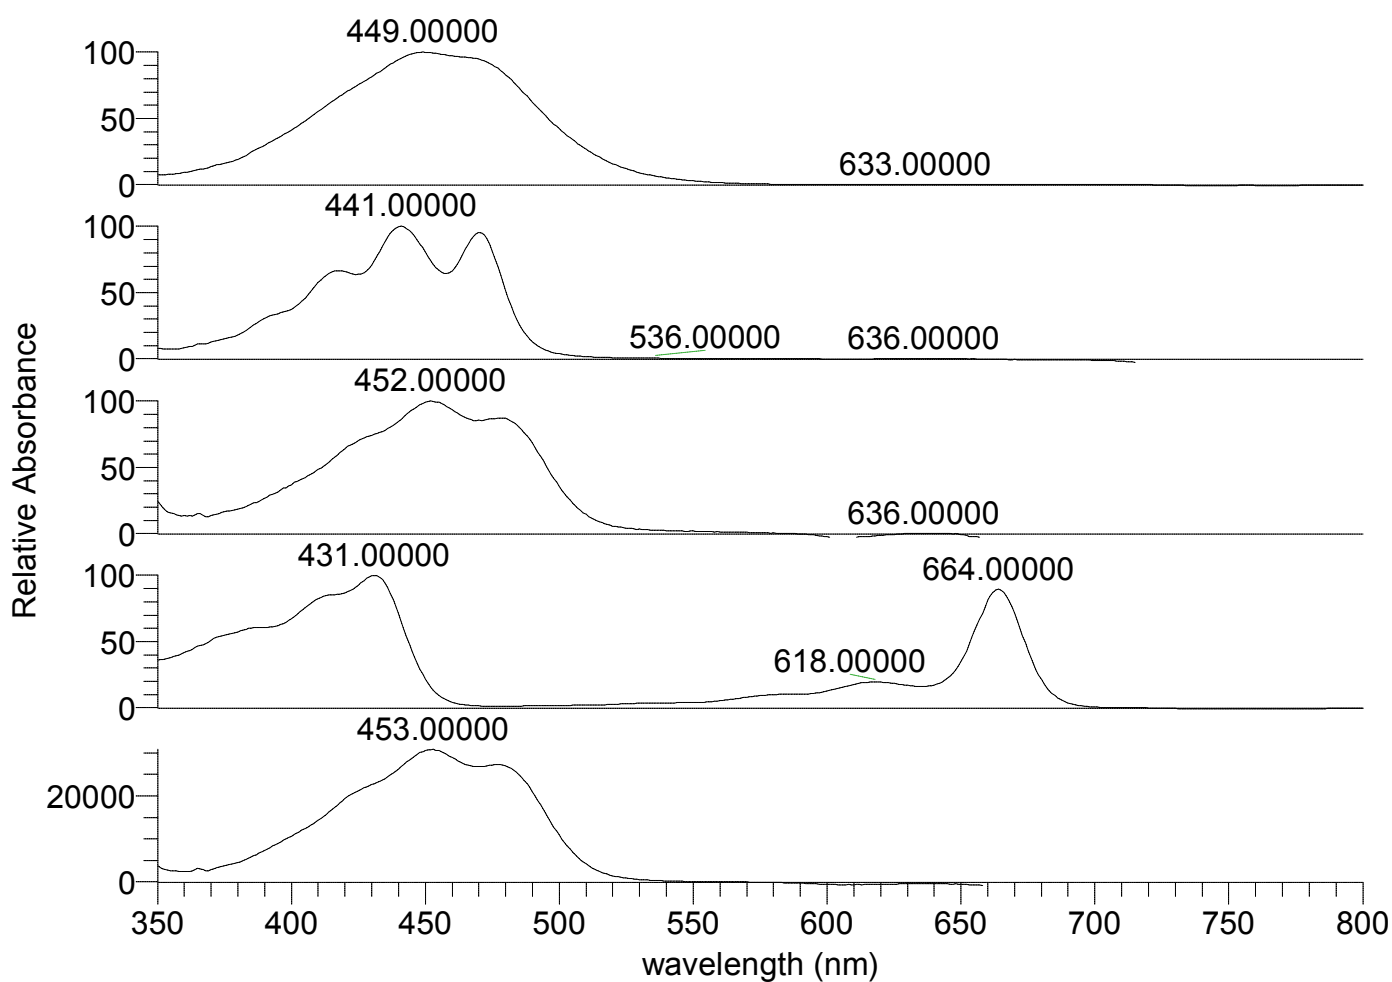NL:  
2.95E5  
25#6195 RT:  
20.65 AV: 1NL:  
4.11E4  
25#6486 RT:  
21.62 AV: 1NL:  
8.98E3  
25#7325 RT:  
24.42 AV: 1NL:  
3.42E5  
25#10776  
RT: 35.92  
AV: 1NL:  
3.08E4  
25#13014  
RT: 43.38  
AV: 1

Supplement: Data_Sheet_1.zip [file Muestra25_HPLC-UV.pdf › Carotenoids/Muestra25_HPLC-UV.pdf]

RT: 0.00 - 61.20

NL:  
2.07E5  
Total Scan  
PDA 26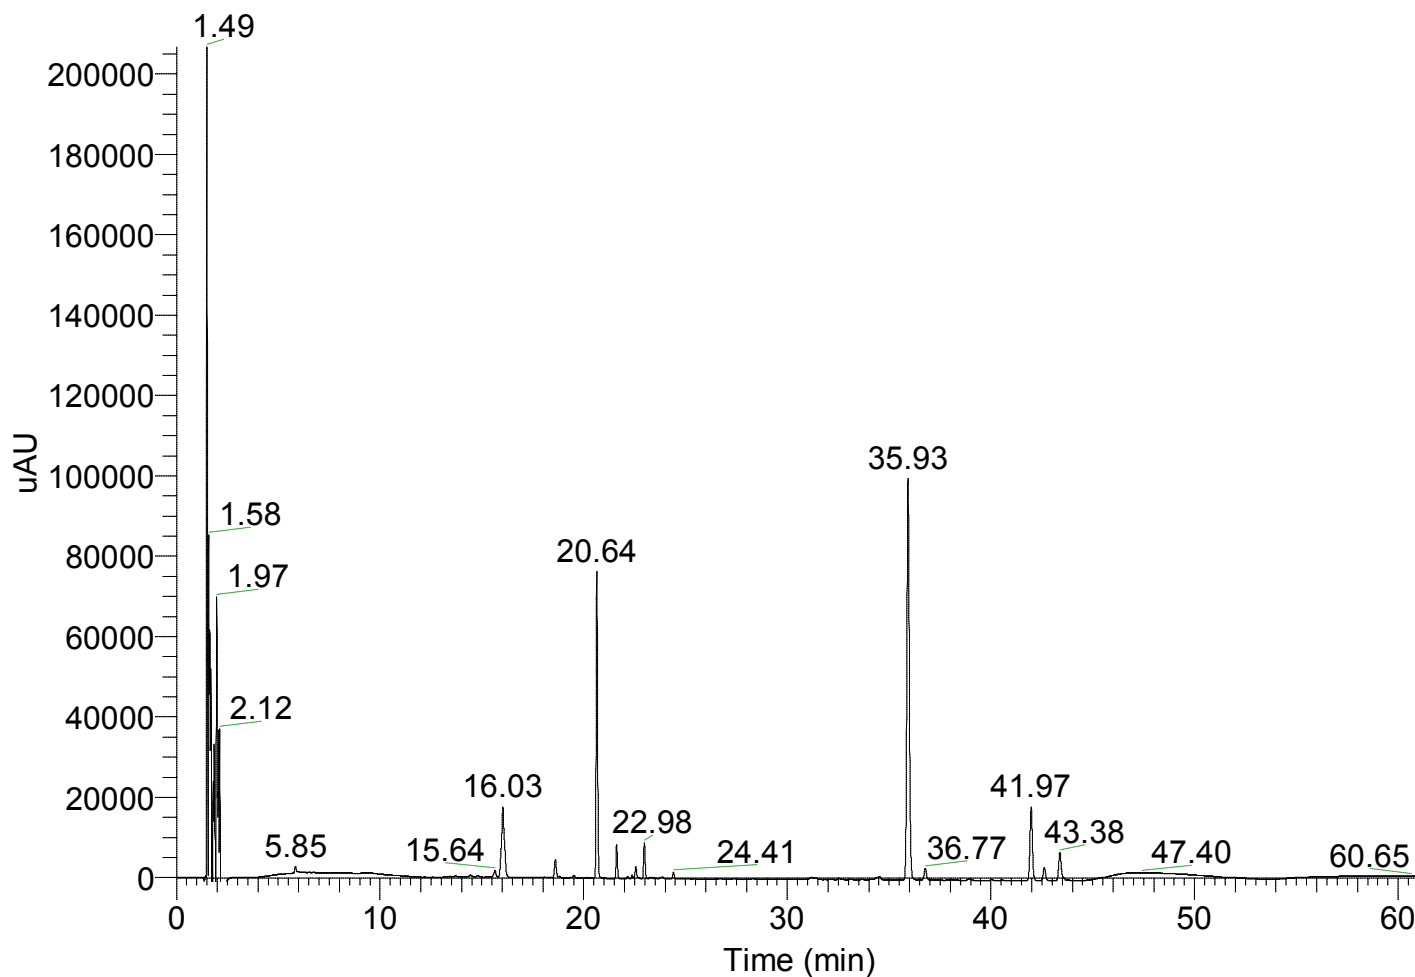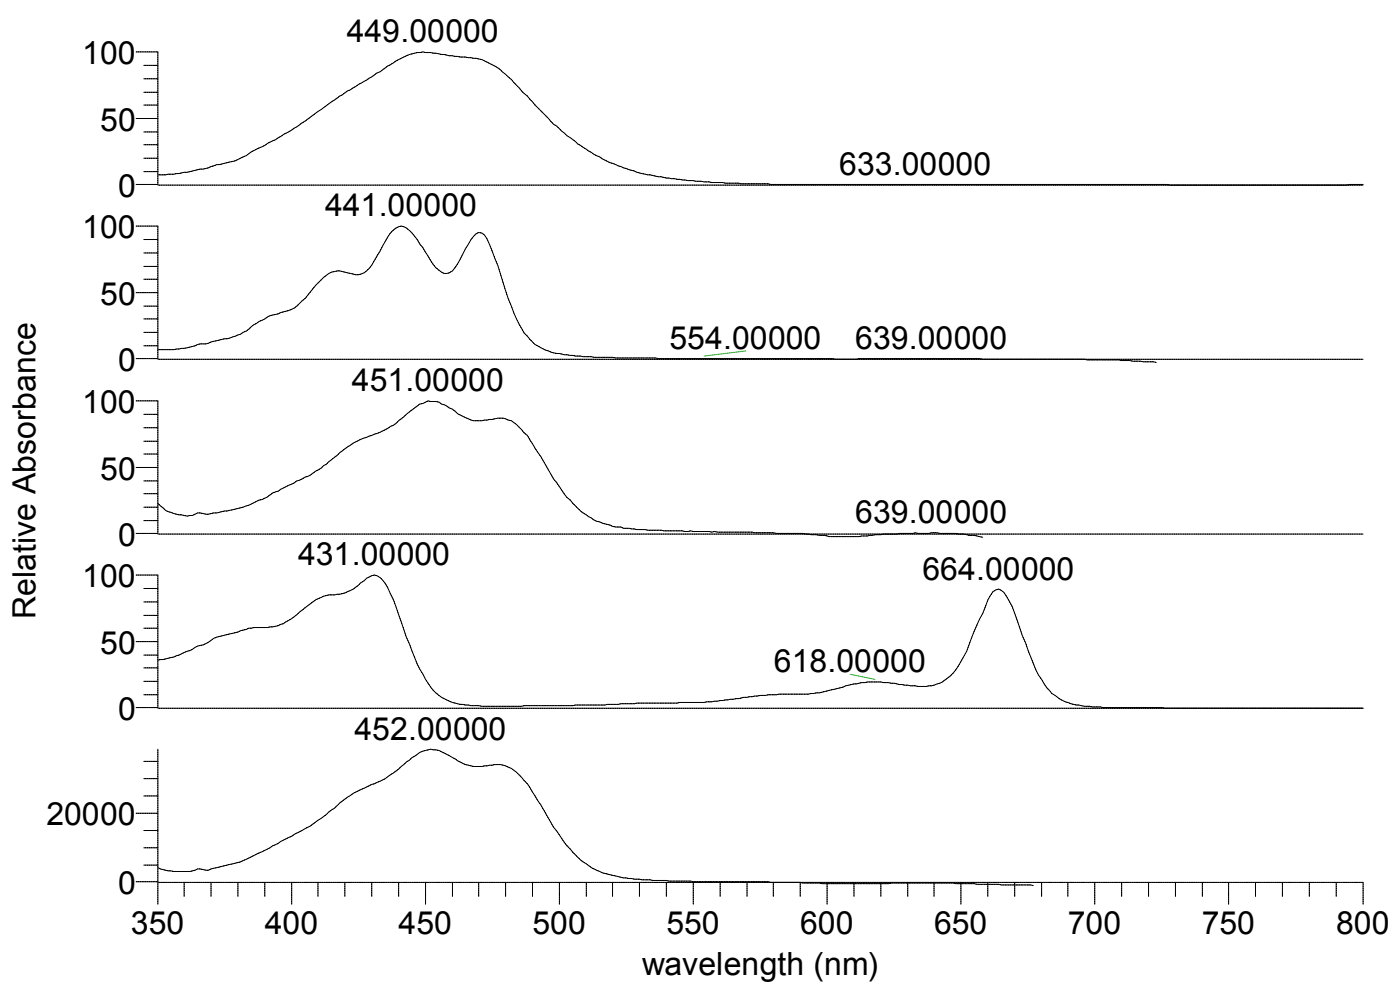NL:  
3.60E5  
26#6193 RT:  
20.64 AV: 1NL:  
5.55E4  
26#6485 RT:  
21.62 AV: 1NL:  
9.94E3  
26#7323 RT:  
24.41 AV: 1NL:  
4.42E5  
26#10779  
RT: 35.93  
AV: 1NL:  
3.84E4  
26#13014  
RT: 43.38  
AV: 1

Supplement: Data_Sheet_1.zip [file Muestra26_HPLC-UV.pdf › Carotenoids/Muestra26_HPLC-UV.pdf]

RT: 0.00 - 61.20

NL:  
2.04E5  
Total Scan  
PDA 27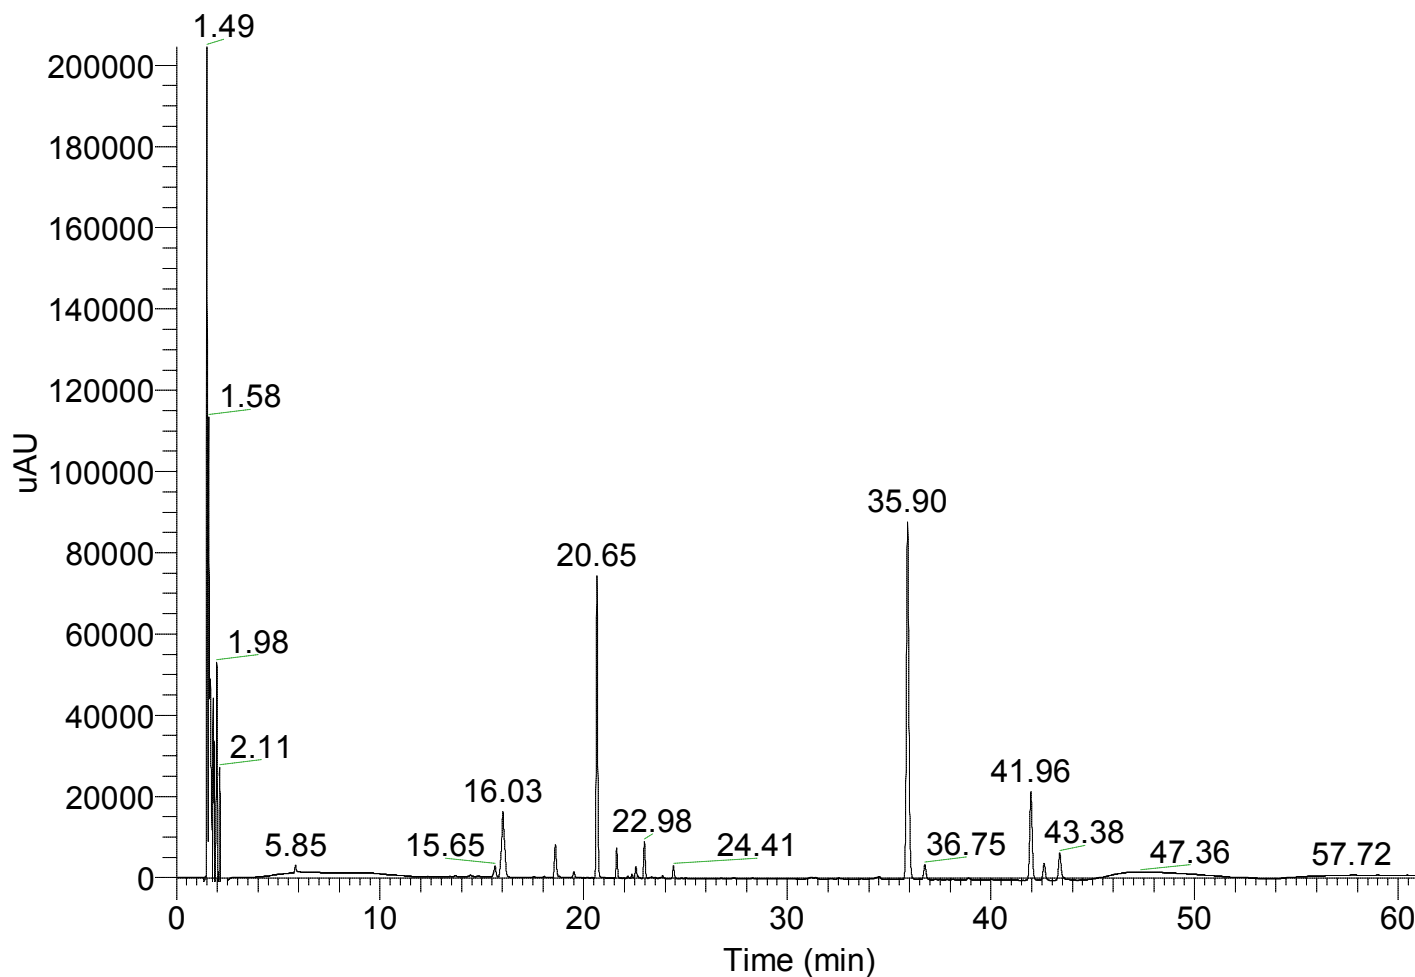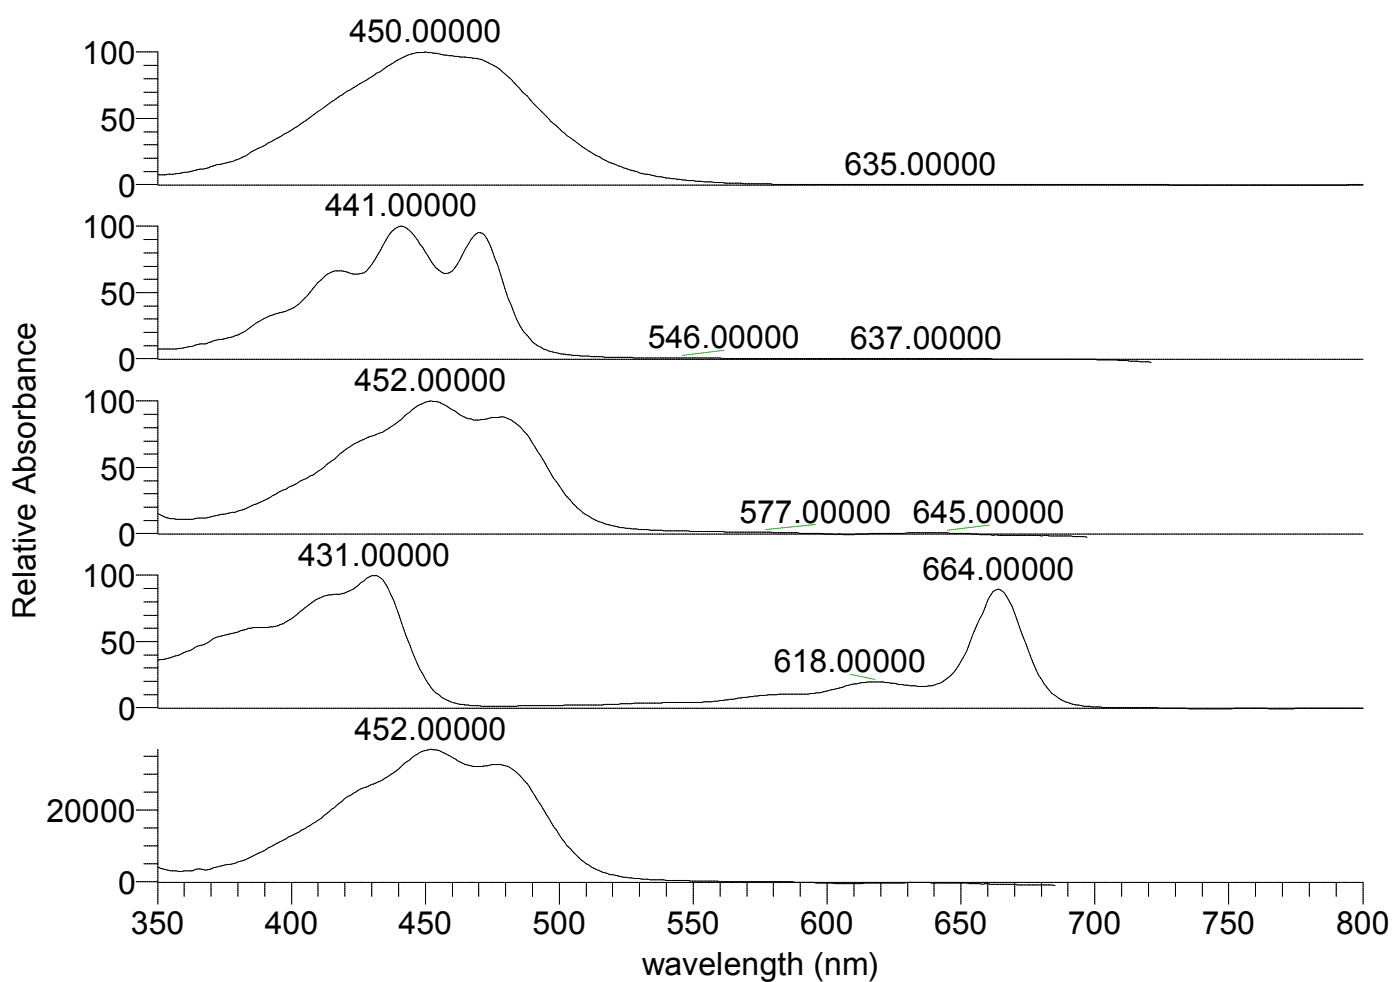NL:  
3.51E5  
27#6194 RT:  
20.65 AV: 1NL:  
4.84E4  
27#6485 RT:  
21.62 AV: 1NL:  
1.79E4  
27#7322 RT:  
24.41 AV: 1NL:  
3.90E5  
27#10770  
RT: 35.90  
AV: 1NL:  
3.69E4  
27#13014  
RT: 43.38  
AV: 1

Supplement: Data_Sheet_1.zip [file Muestra27_HPLC-UV.pdf › Carotenoids/Muestra27_HPLC-UV.pdf]

RT: 0.00 - 61.20

NL:  
2.06E5  
Total Scan  
PDA 28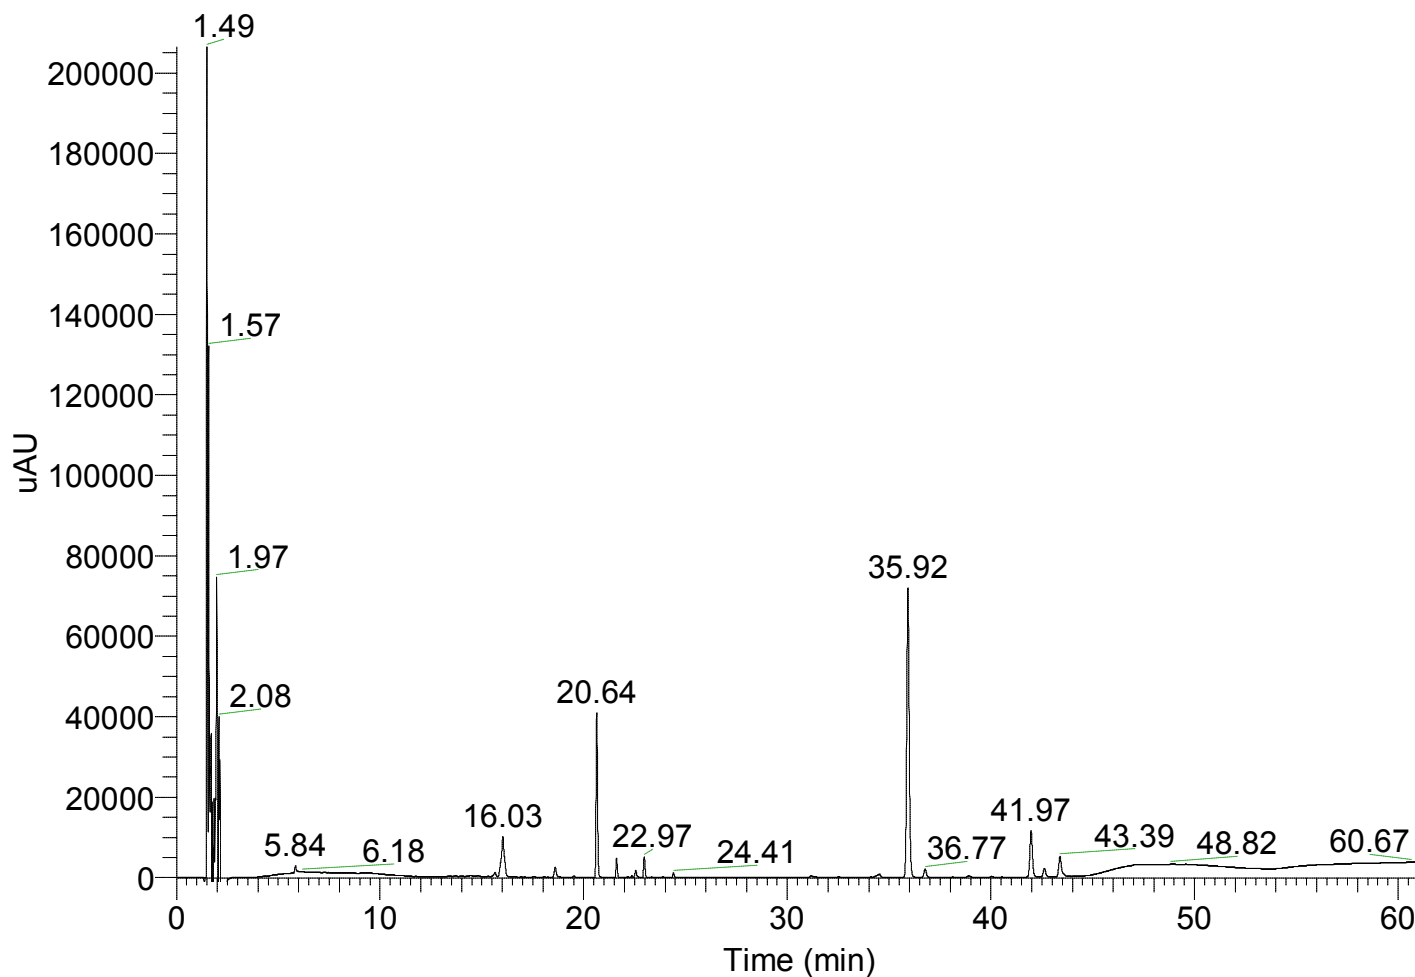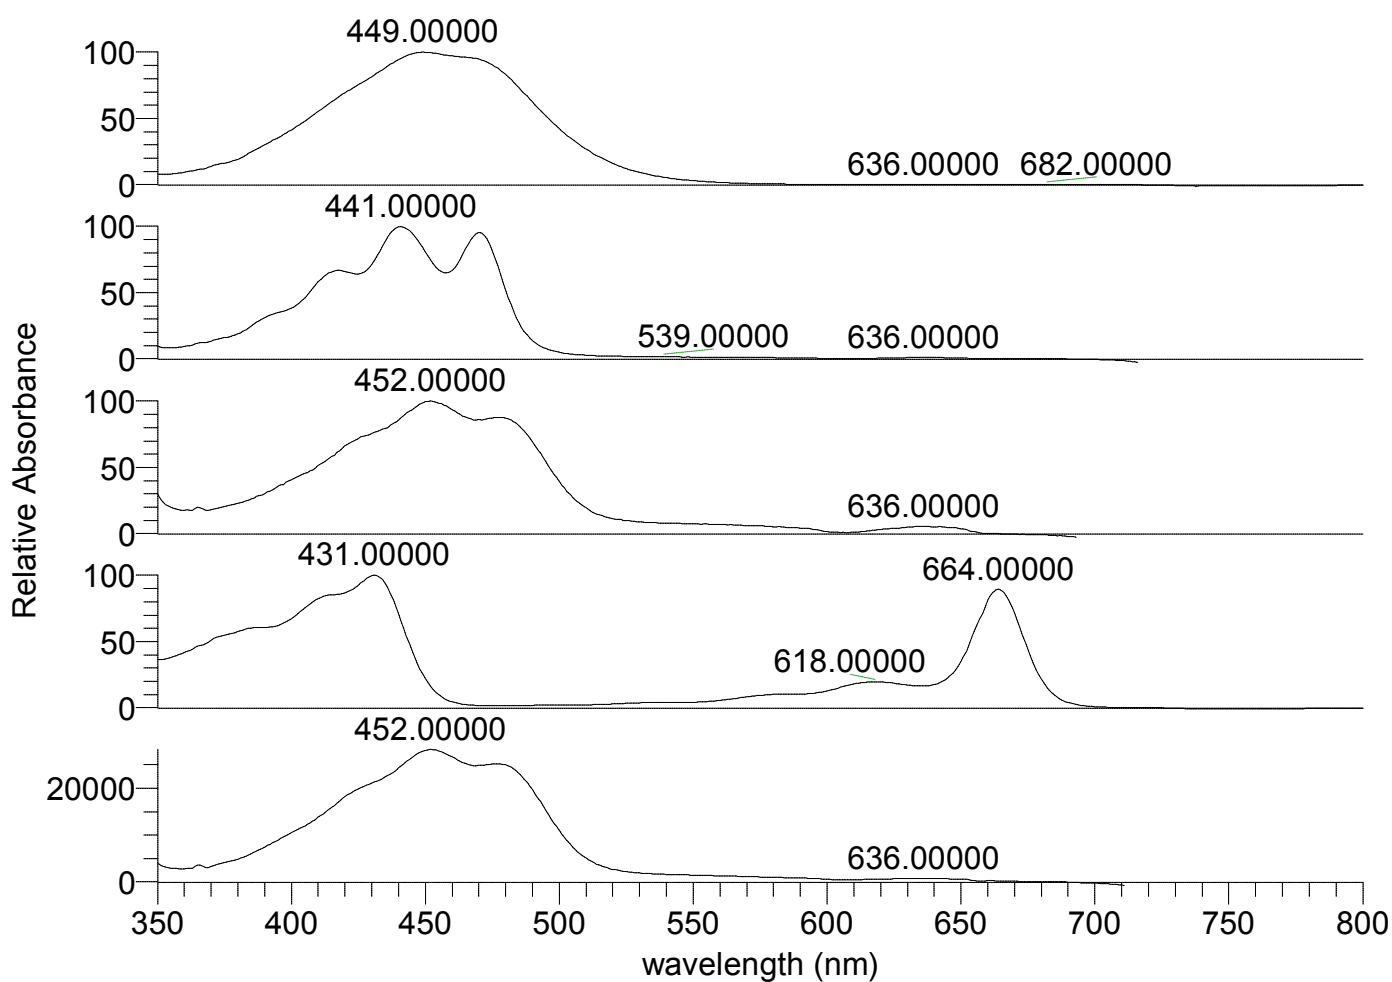NL:  
1.94E5  
28#6192 RT:  
20.64 AV: 1NL:  
3.20E4  
28#6484 RT:  
21.61 AV: 1NL:  
7.34E3  
28#7324 RT:  
24.41 AV: 1NL:  
3.19E5  
28#10776  
RT: 35.92  
AV: 1NL:  
2.83E4  
28#13017  
RT: 43.39  
AV: 1

Supplement: Data_Sheet_1.zip [file Muestra28_HPLC-UV.pdf › Carotenoids/Muestra28_HPLC-UV.pdf]

RT: 0.00 - 61.20

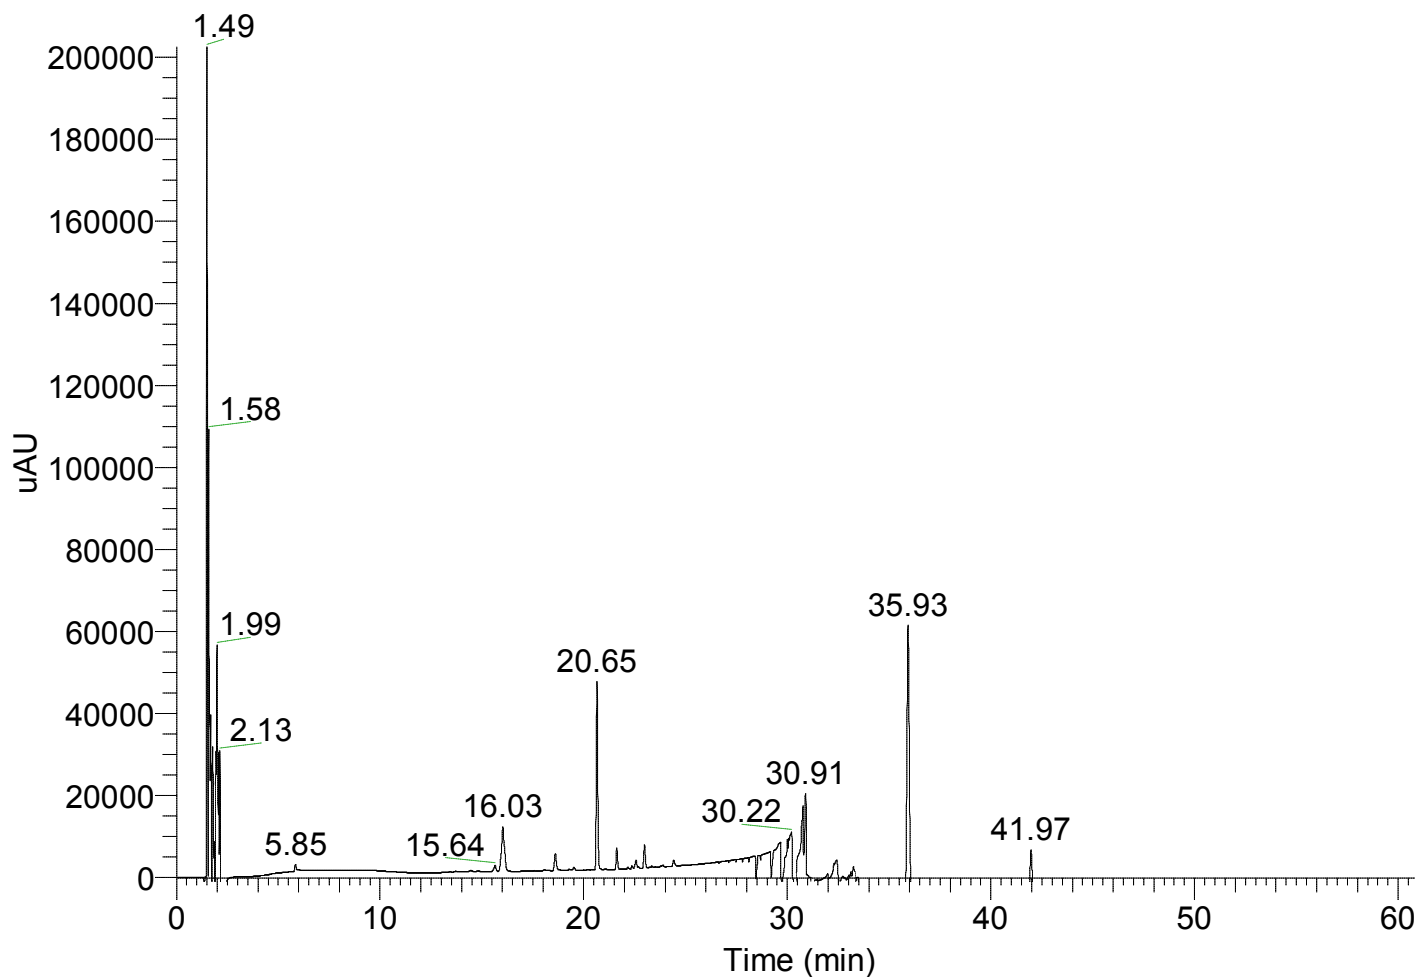

NL:  
2.02E5  
Total Scan  
PDA 29

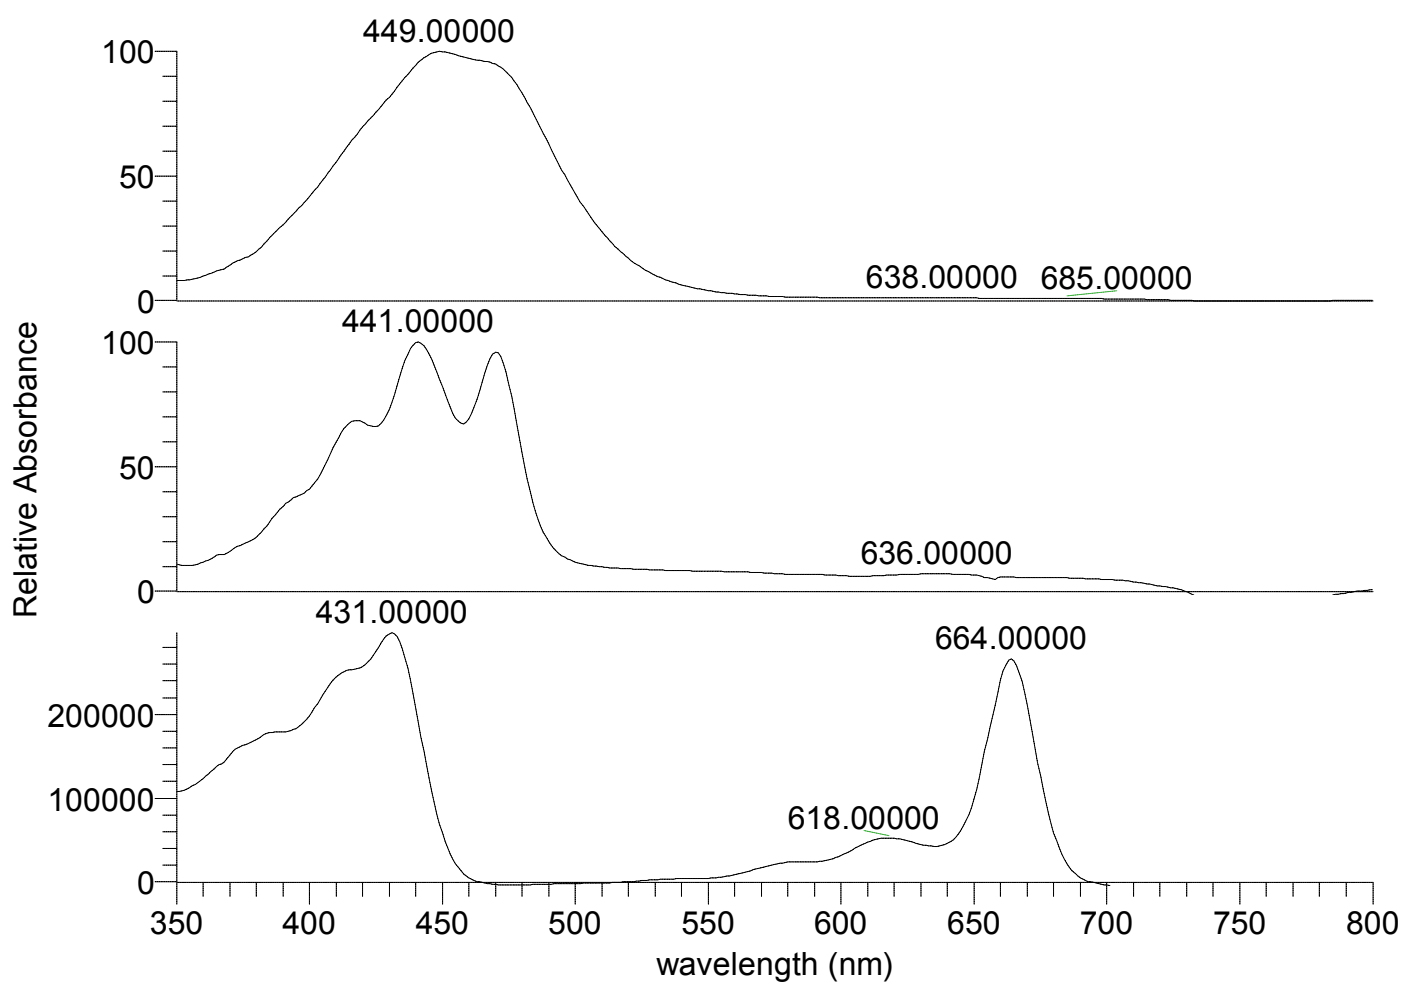

Supplement: Data_Sheet_1.zip [file Muestra29_HPLC-UV.pdf › Carotenoids/Muestra29_HPLC-UV.pdf]

RT: 0.00 - 61.20

NL:  
2.06E5  
Total Scan  
PDA 30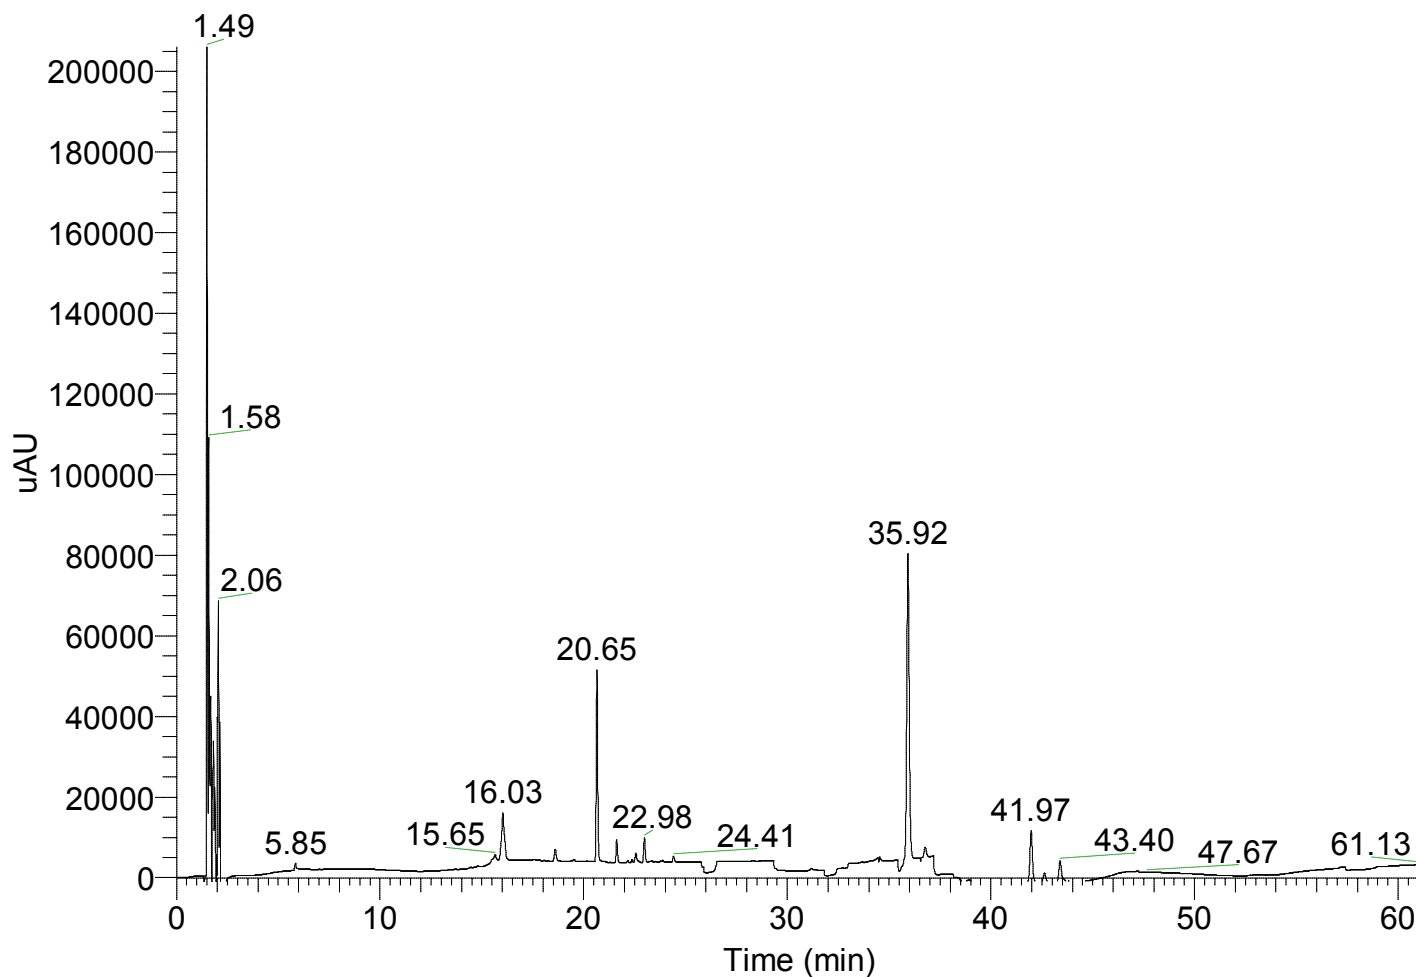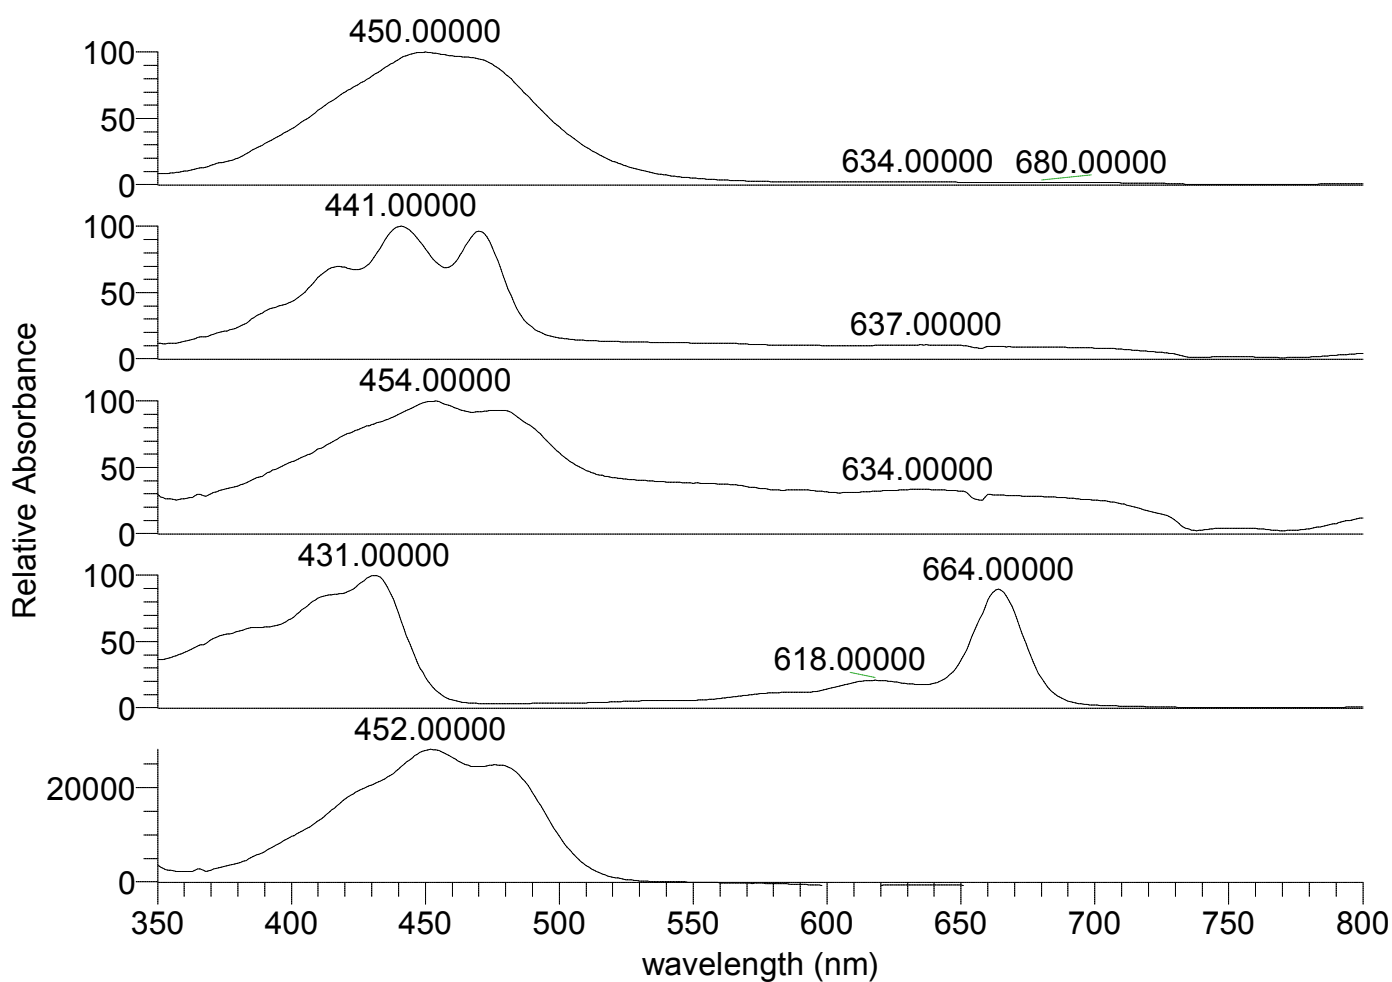NL:  
2.29E5  
30#6194 RT:  
20.65 AV: 1NL:  
4.09E4  
30#6486 RT:  
21.62 AV: 1NL:  
1.35E4  
30#7323 RT:  
24.41 AV: 1NL:  
3.42E5  
30#10776  
RT: 35.92  
AV: 1NL:  
2.81E4  
30#13020  
RT: 43.40  
AV: 1

Supplement: Data_Sheet_1.zip [file Muestra30_HPLC-UV.pdf › Carotenoids/Muestra30_HPLC-UV.pdf]

RT: 0.00 - 61.20

NL:  
2.09E5  
Total Scan  
PDA 31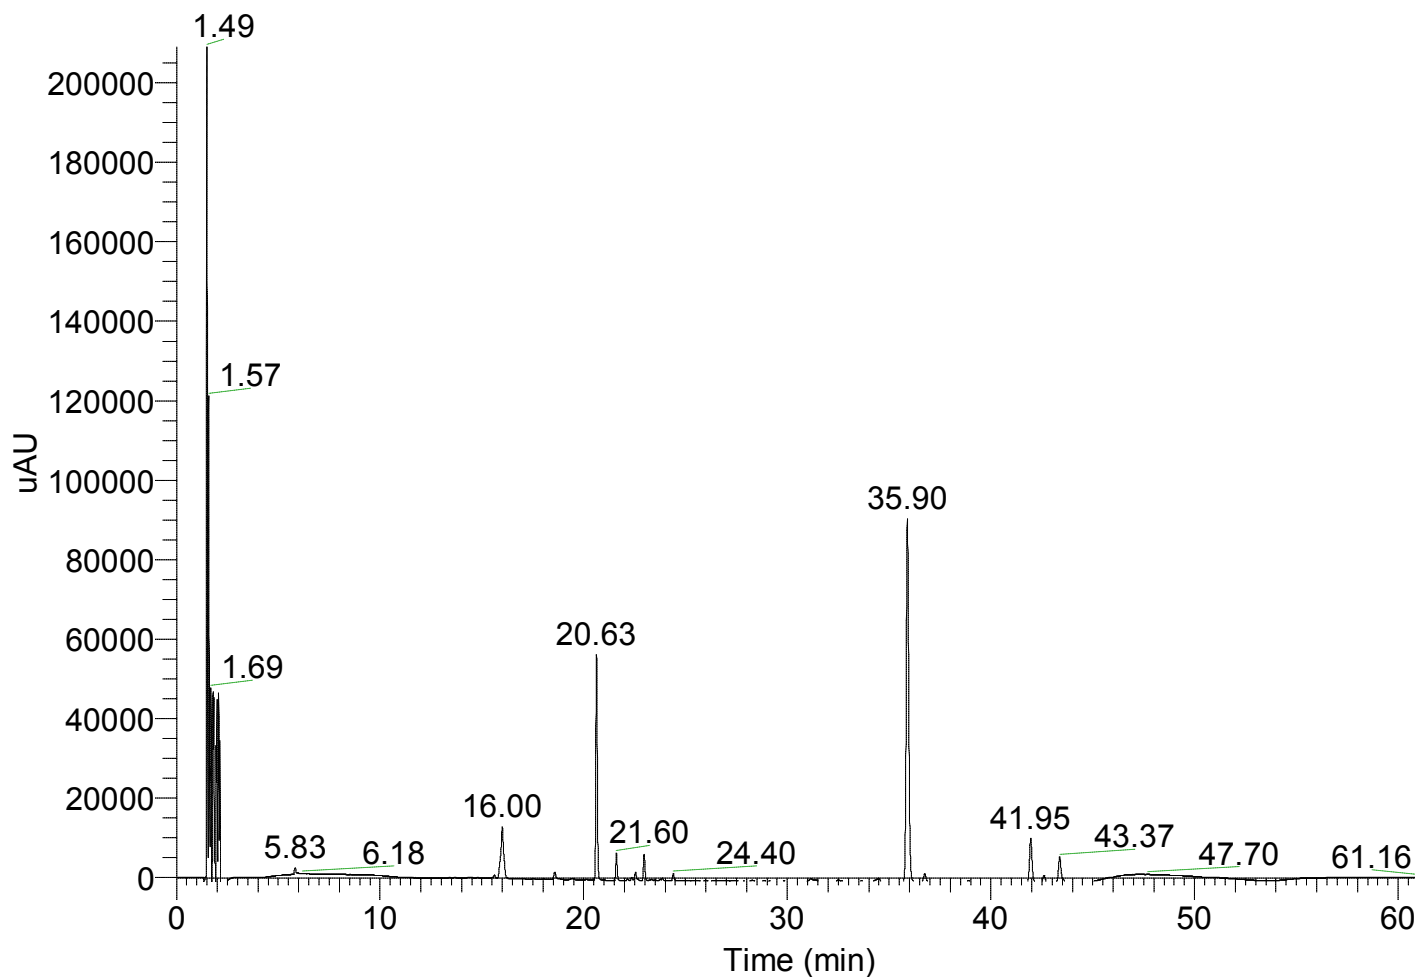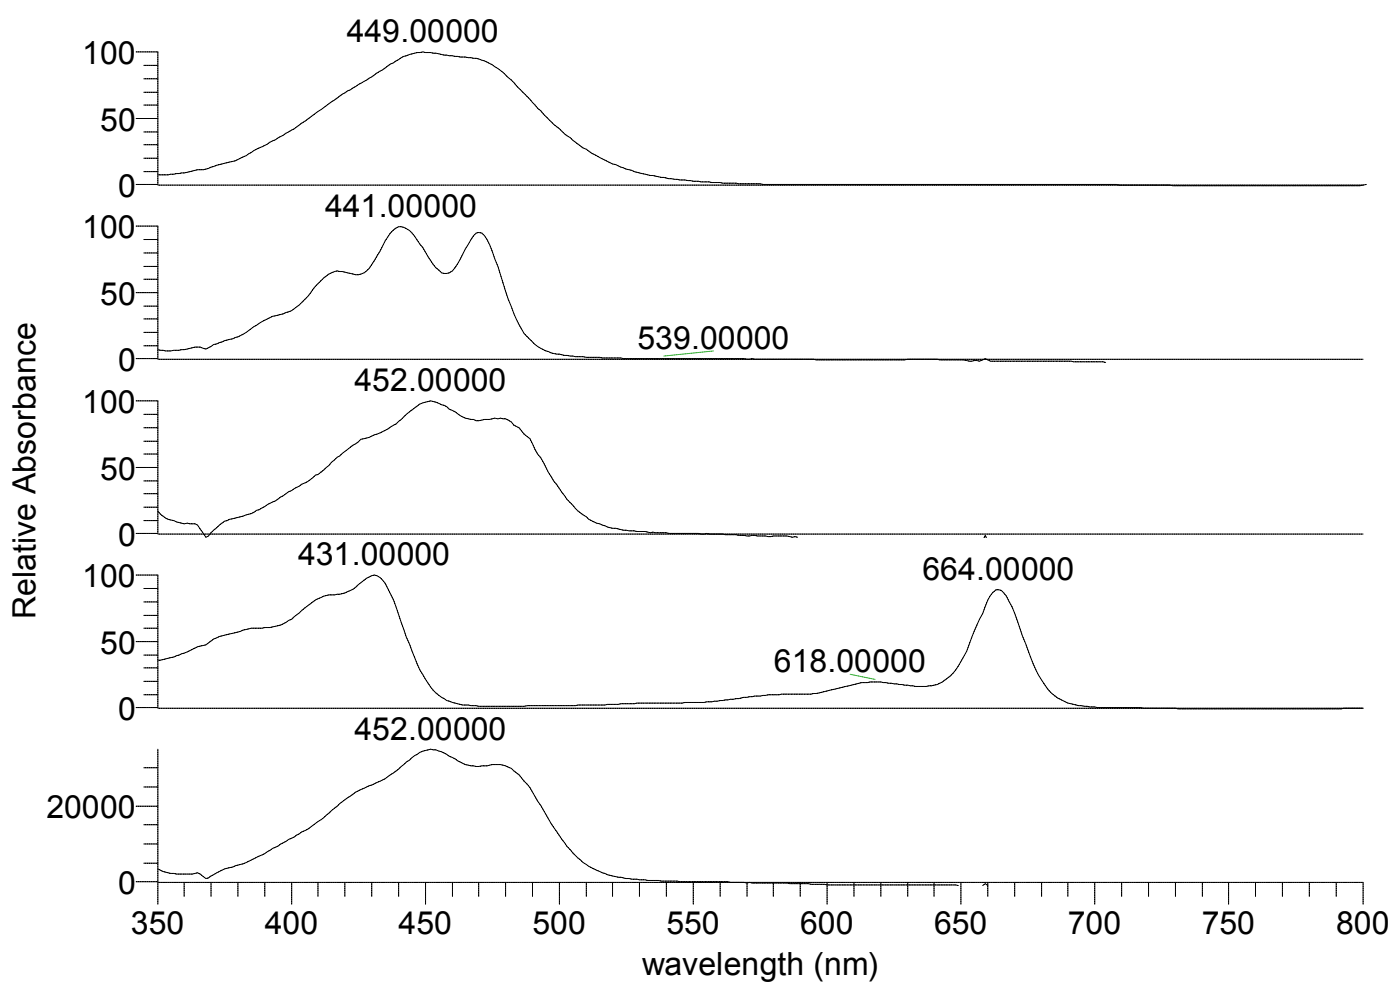NL:  
2.62E5  
31#6190 RT:  
20.63 AV: 1NL:  
4.34E4  
31#6479 RT:  
21.60 AV: 1NL:  
1.05E4  
31#7321 RT:  
24.40 AV: 1NL:  
4.04E5  
31#10770  
RT: 35.90  
AV: 1NL:  
3.49E4  
31#13011  
RT: 43.37  
AV: 1

Supplement: Data_Sheet_1.zip [file Muestra31_HPLC-UV.pdf › Carotenoids/Muestra31_HPLC-UV.pdf]

RT: 0.00 - 61.20

NL:  
2.12E5  
Total Scan  
PDA 32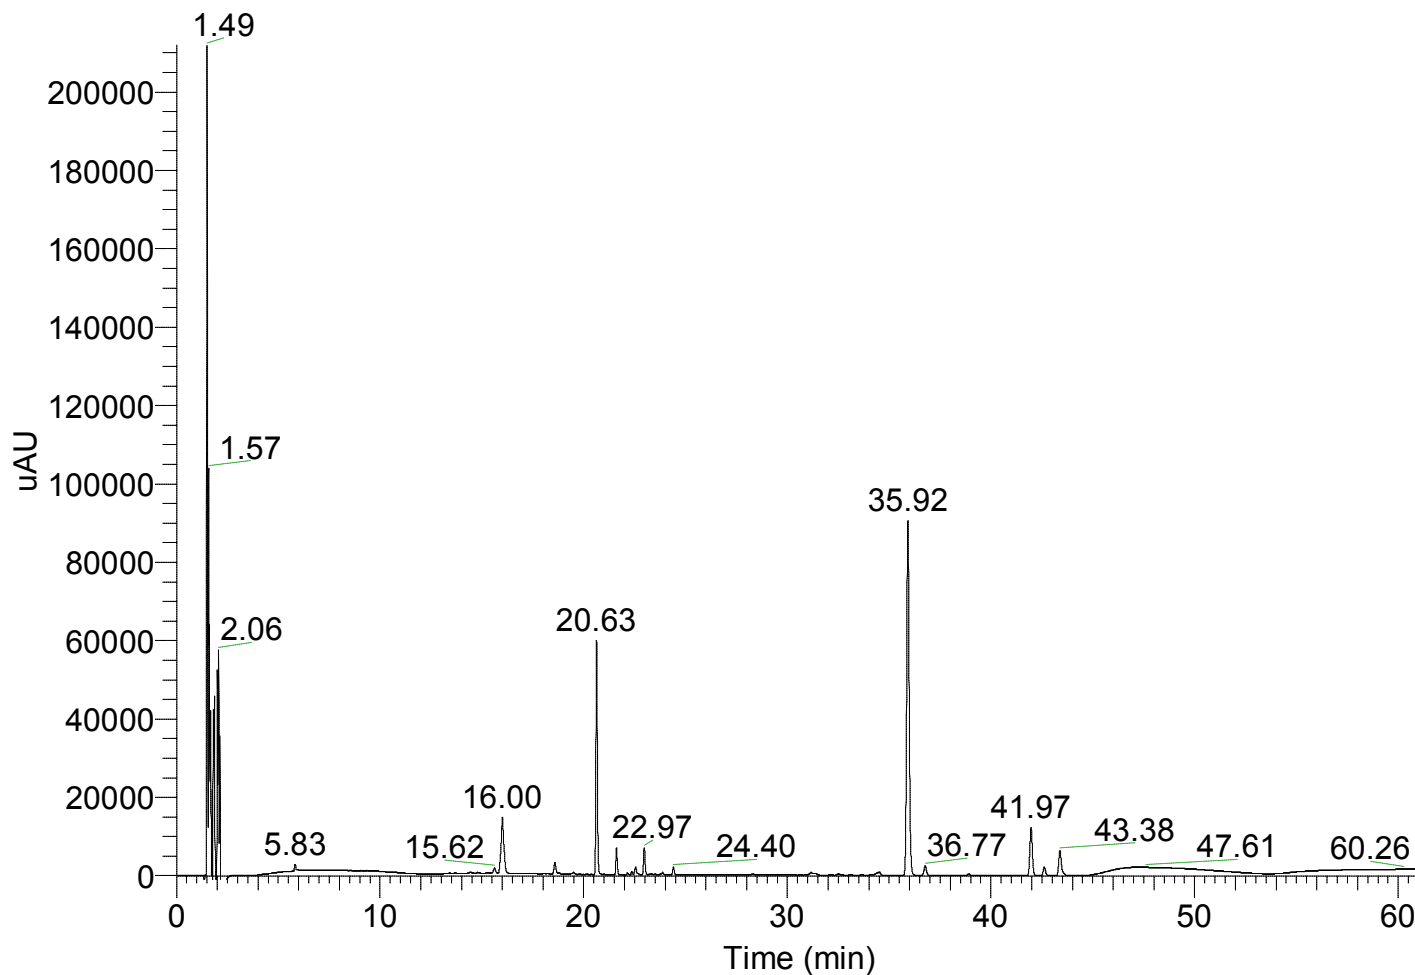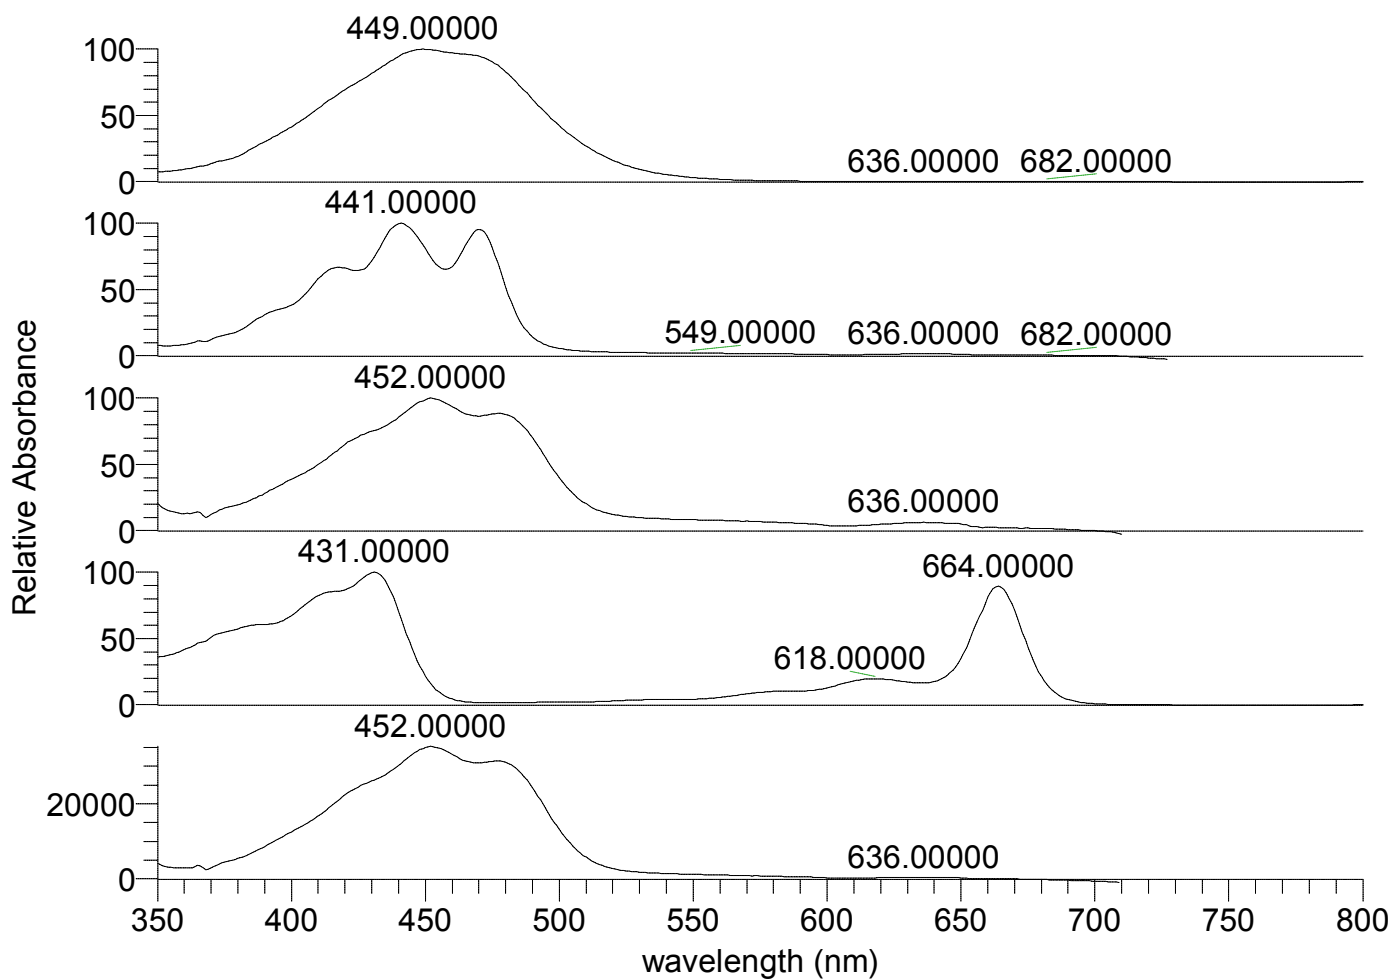NL:  
2.81E5  
32#6188 RT:  
20.63 AV: 1NL:  
4.47E4  
32#6482 RT:  
21.61 AV: 1NL:  
1.21E4  
32#7320 RT:  
24.40 AV: 1NL:  
4.00E5  
32#10776  
RT: 35.92  
AV: 1NL:  
3.53E4  
32#13013  
RT: 43.38  
AV: 1

Supplement: Data_Sheet_1.zip [file Muestra32_HPLC-UV.pdf › Carotenoids/Muestra32_HPLC-UV.pdf]

RT: 0.00 - 61.20

NL:  
2.11E5  
Total Scan  
PDA 33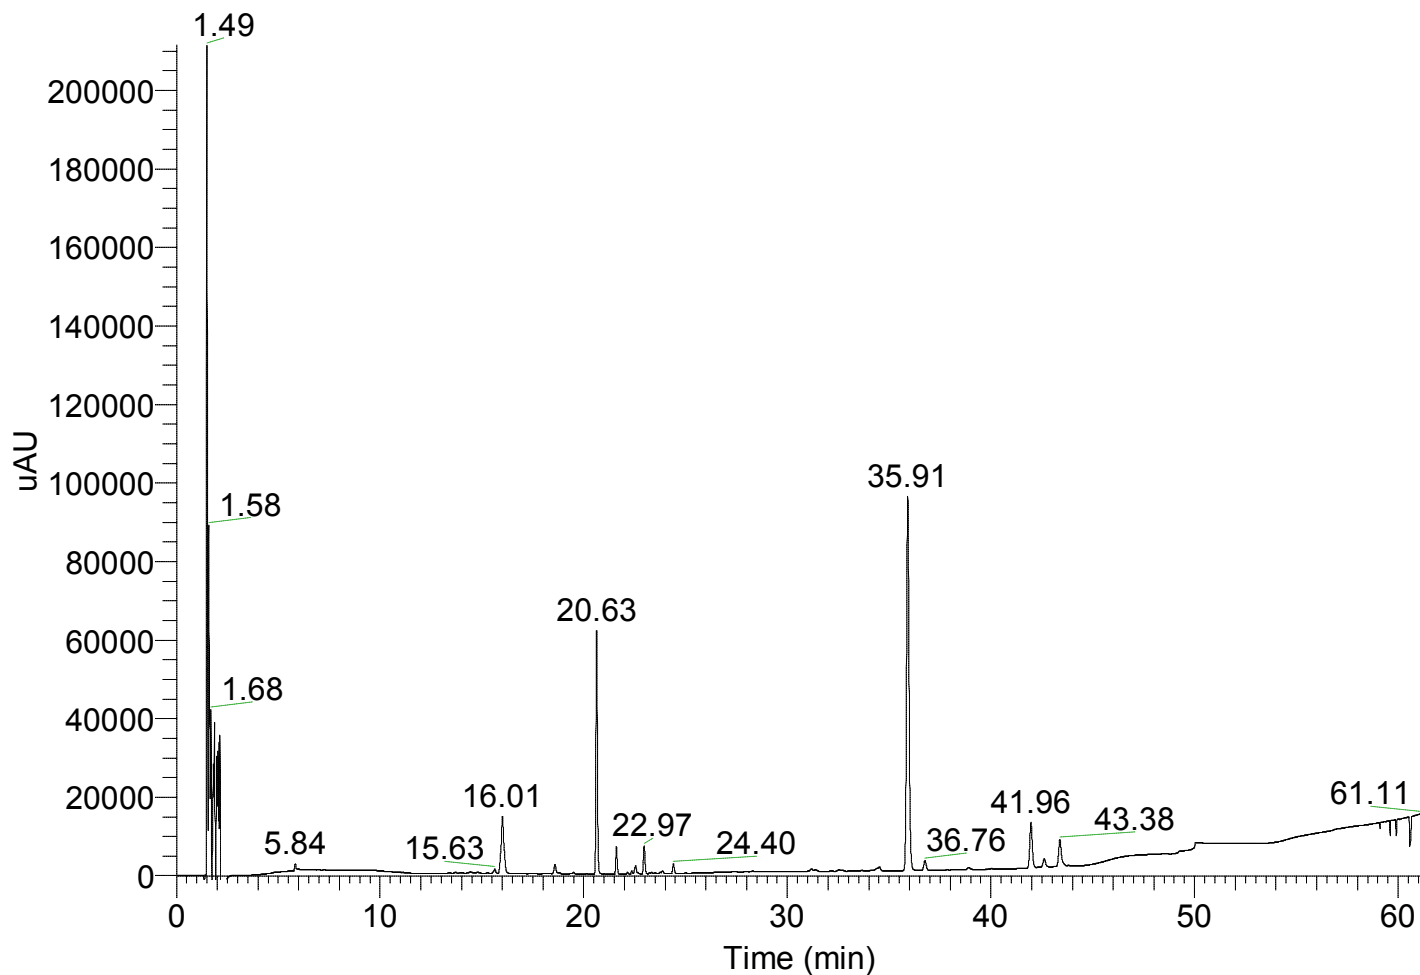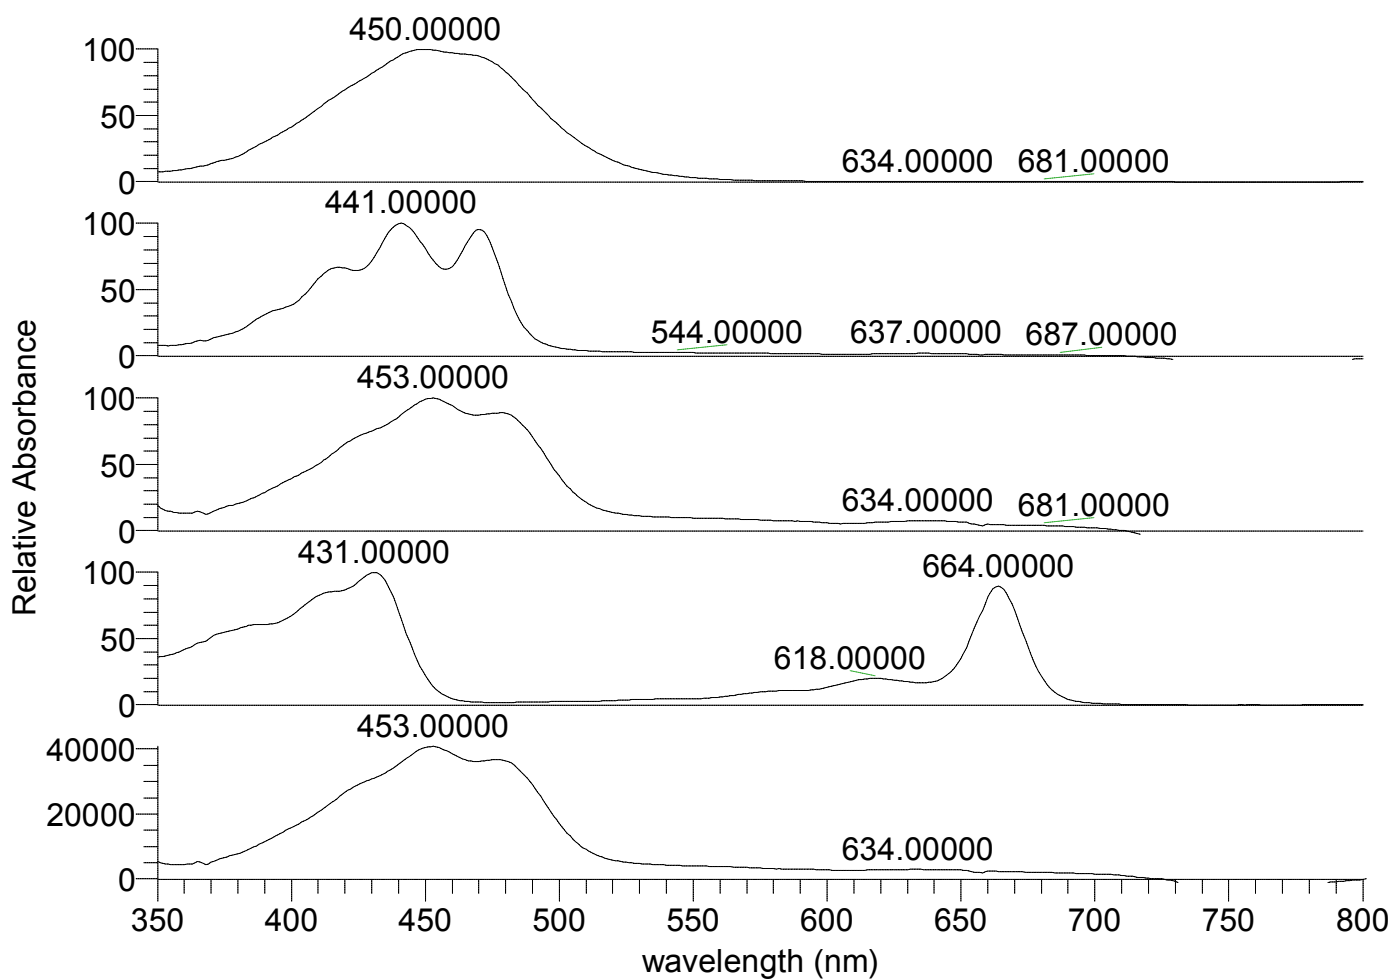NL:  
2.92E5  
33#6189 RT:  
20.63 AV: 1NL:  
4.57E4  
33#6482 RT:  
21.61 AV: 1NL:  
1.48E4  
33#7320 RT:  
24.40 AV: 1NL:  
4.24E5  
33#10773  
RT: 35.91  
AV: 1NL:  
4.08E4  
33#13014  
RT: 43.38  
AV: 1

Supplement: Data_Sheet_1.zip [file Muestra33_HPLC-UV.pdf › Carotenoids/Muestra33_HPLC-UV.pdf]

RT: 0.00 - 61.20

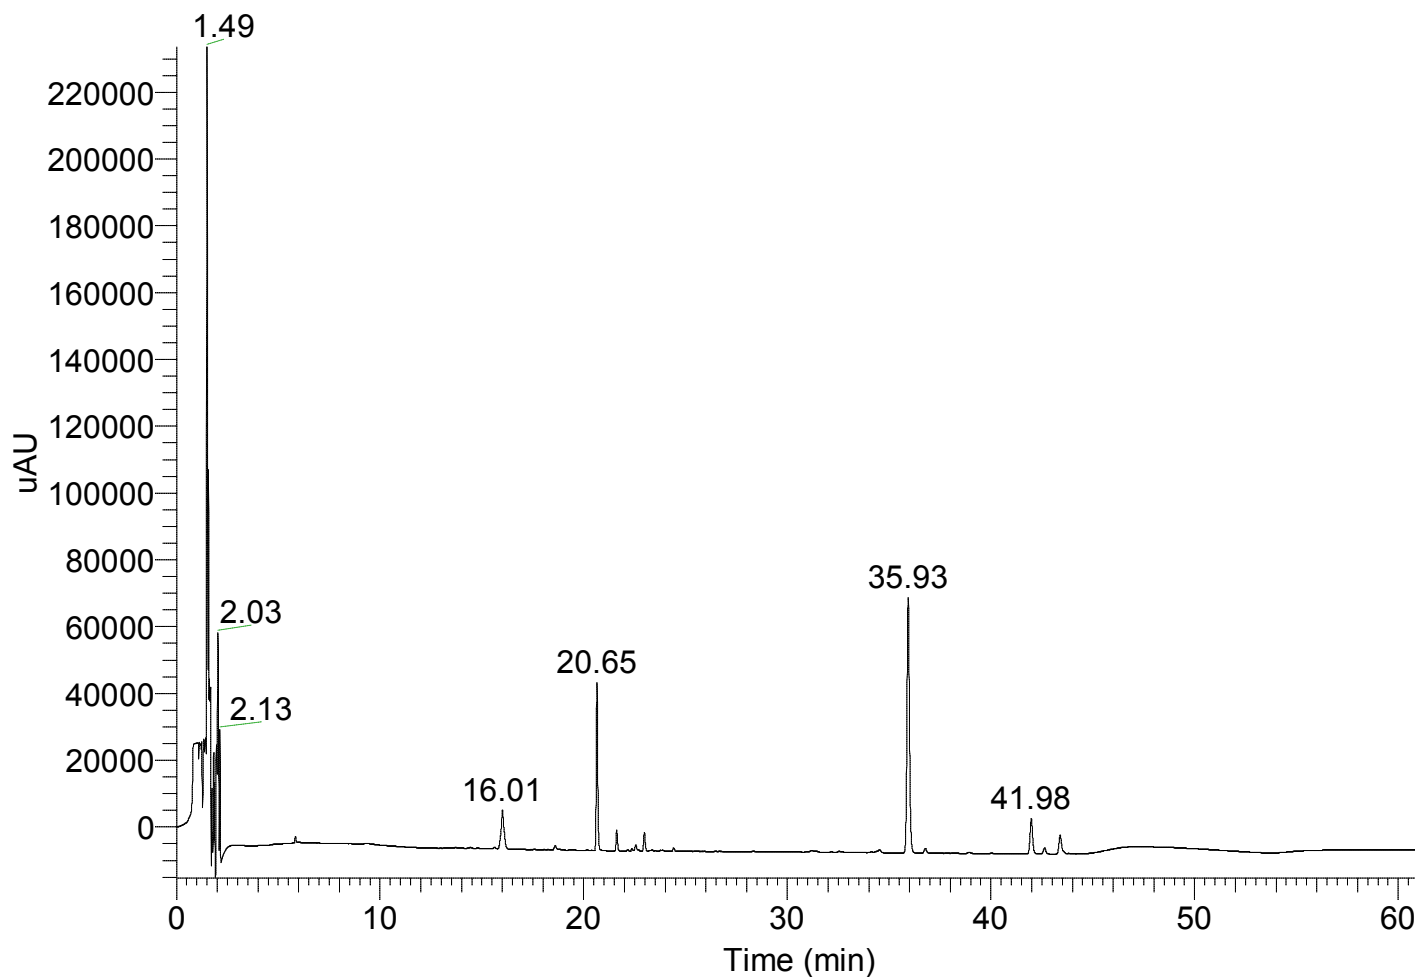

NL:  
2.33E5  
Total Scan  
PDA 34

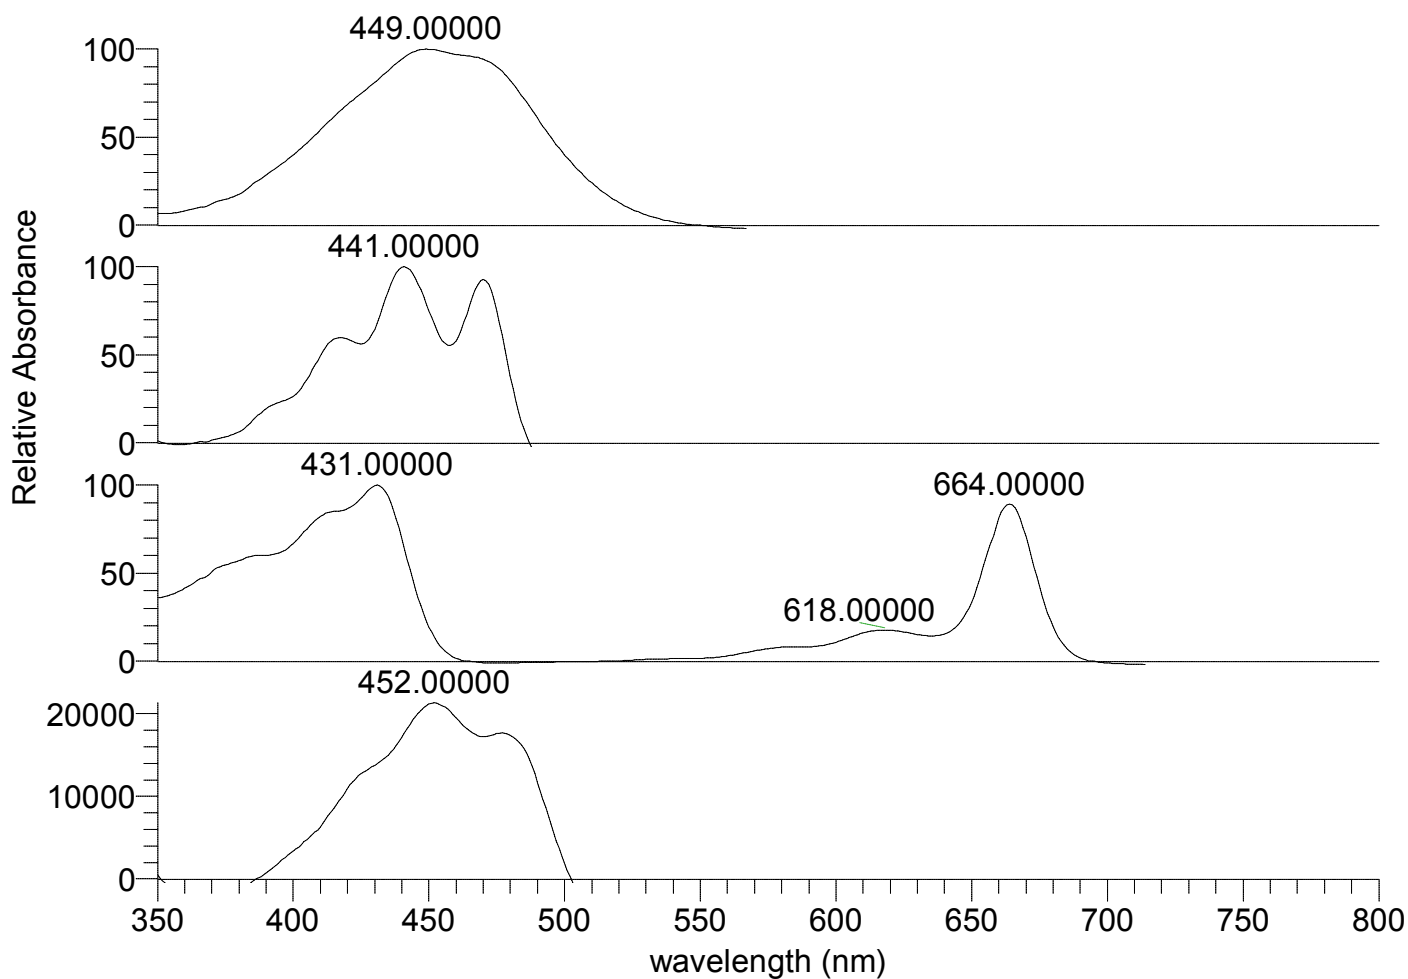

NL:  
2.28E5  
34#6194  
RT: 20.65  
AV: 1

NL:  
3.19E4  
34#6486  
RT: 21.62  
AV: 1

NL:  
3.31E5  
34#10779  
RT: 35.93  
AV: 1

NL:  
2.13E4  
34#13019  
RT: 43.40  
AV: 1

Supplement: Data_Sheet_1.zip [file Muestra34_HPLC-UV.pdf › Carotenoids/Muestra34_HPLC-UV.pdf]

RT: 0.00 - 61.20

NL:  
2.09E5  
Total Scan  
PDA 35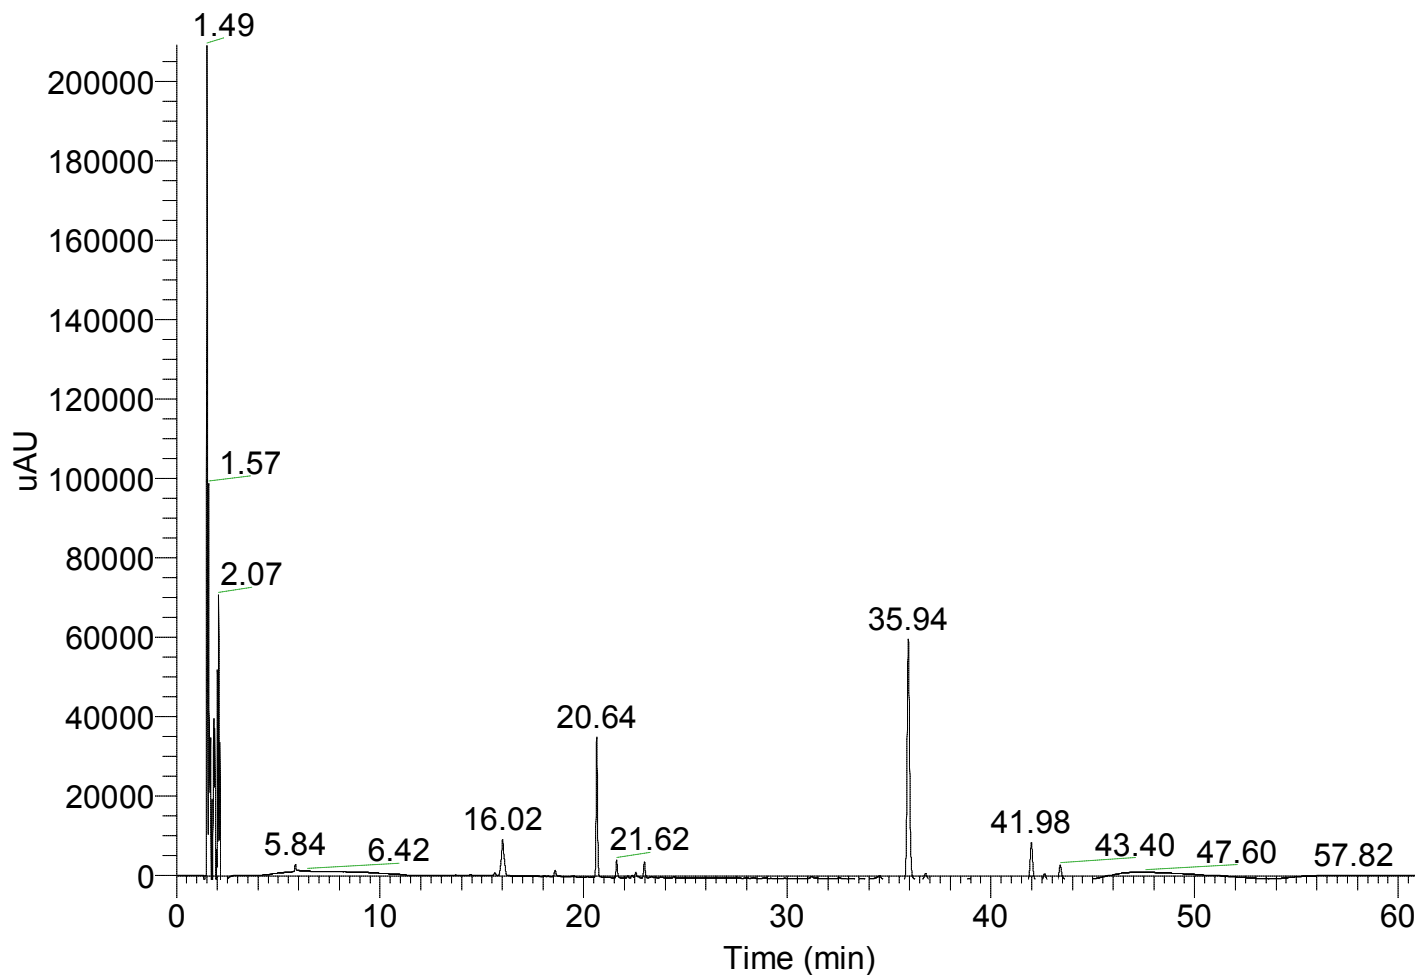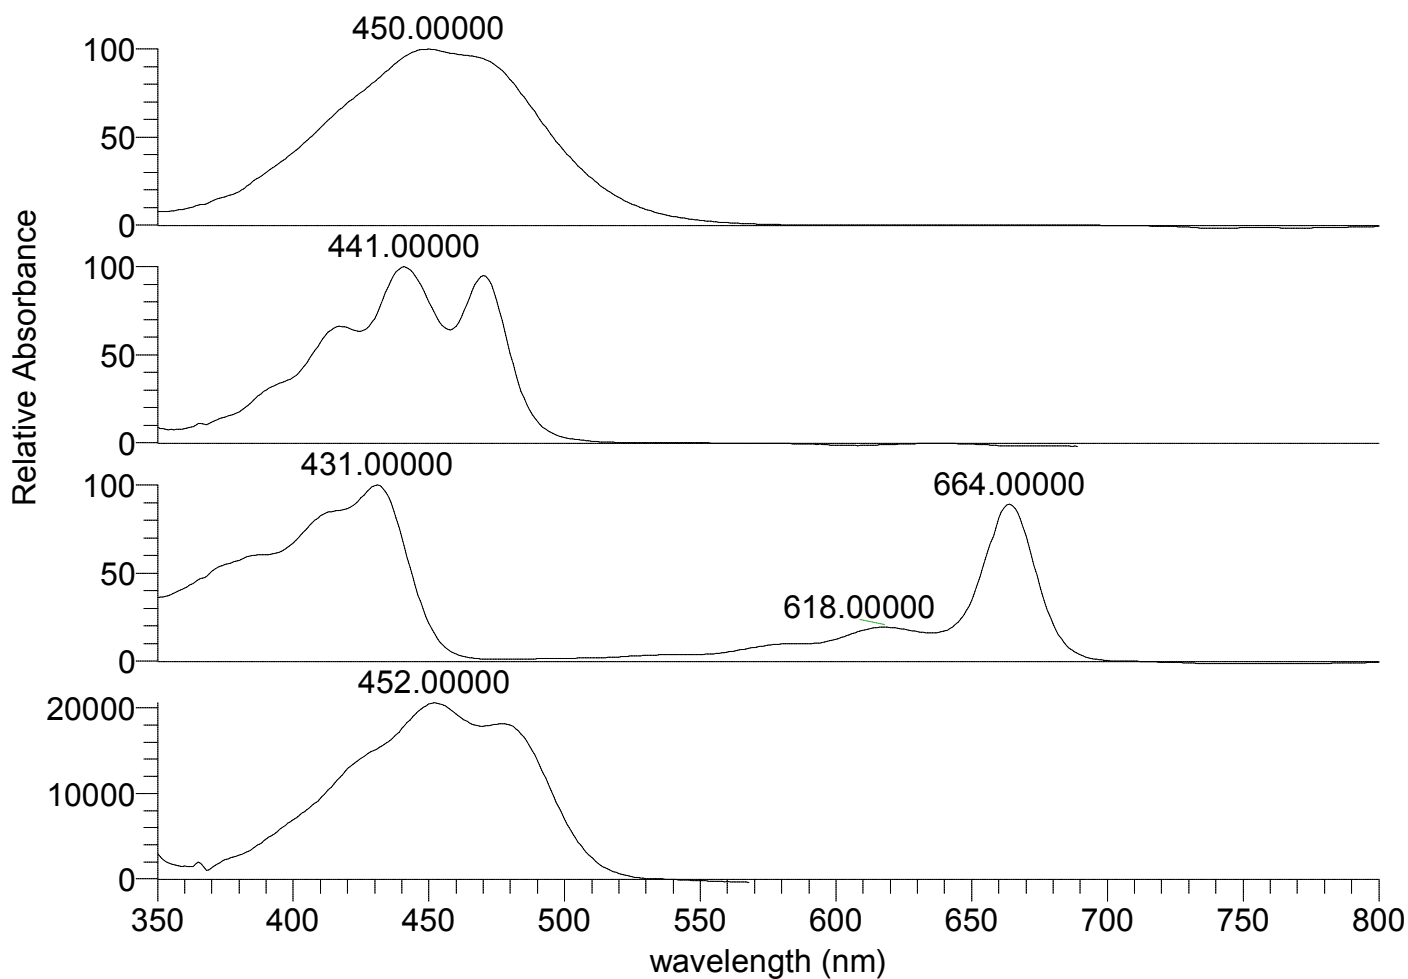NL:  
1.66E5  
35#6192  
RT: 20.64  
AV: 1NL:  
2.87E4  
35#6487  
RT: 21.62  
AV: 1NL:  
2.68E5  
35#10782  
RT: 35.94  
AV: 1NL:  
2.06E4  
35#13019  
RT: 43.40  
AV: 1

Supplement: Data_Sheet_1.zip [file Muestra35_HPLC-UV.pdf › Carotenoids/Muestra35_HPLC-UV.pdf]

RT: 0.00 - 61.20

NL:  
2.11E5  
Total Scan  
PDA 36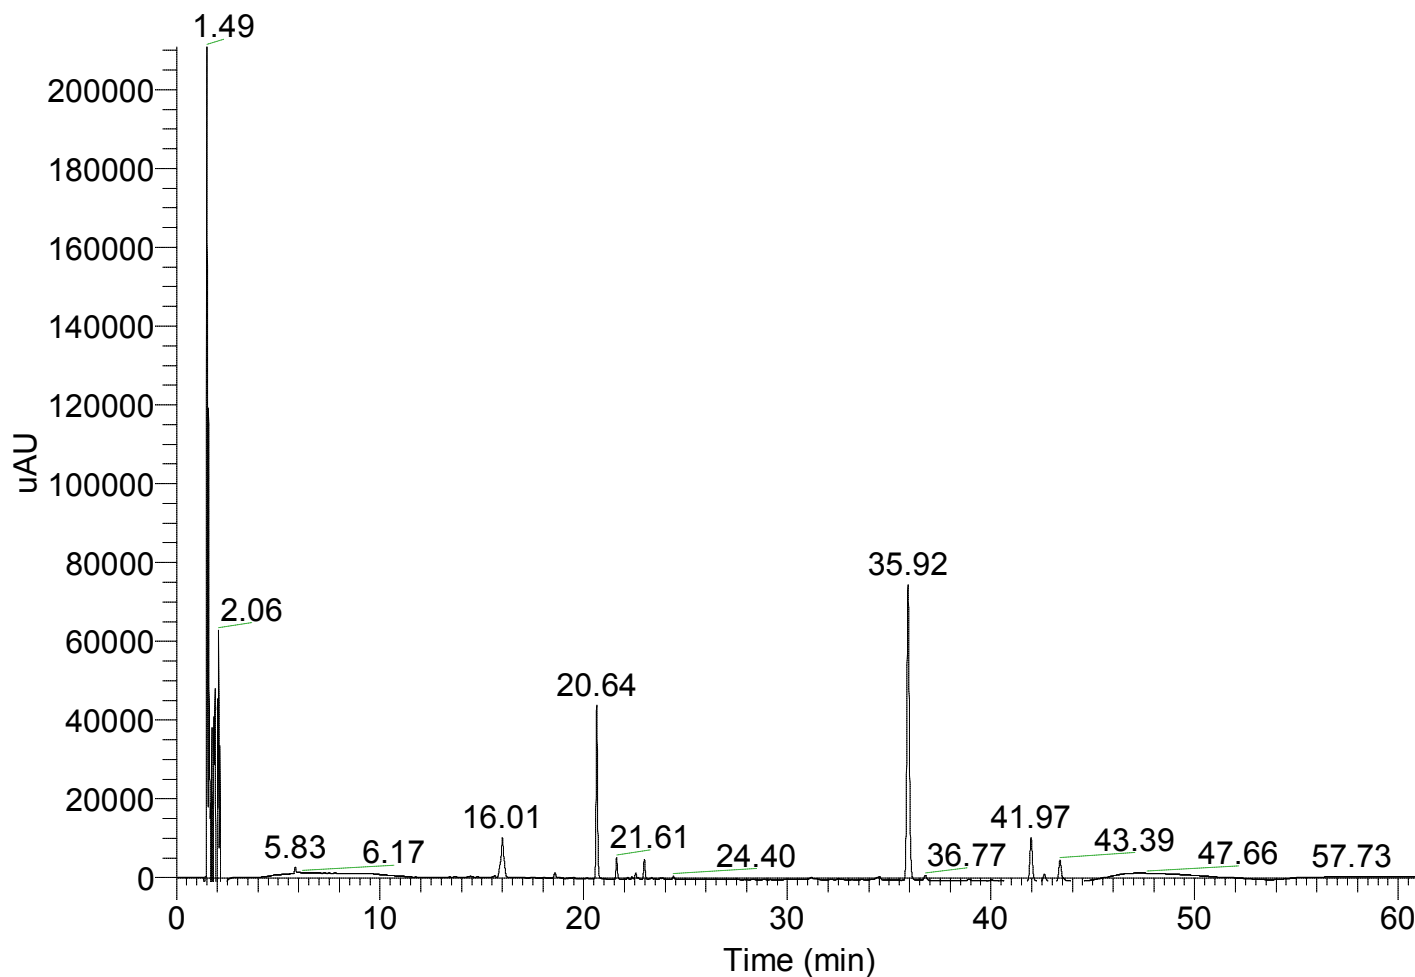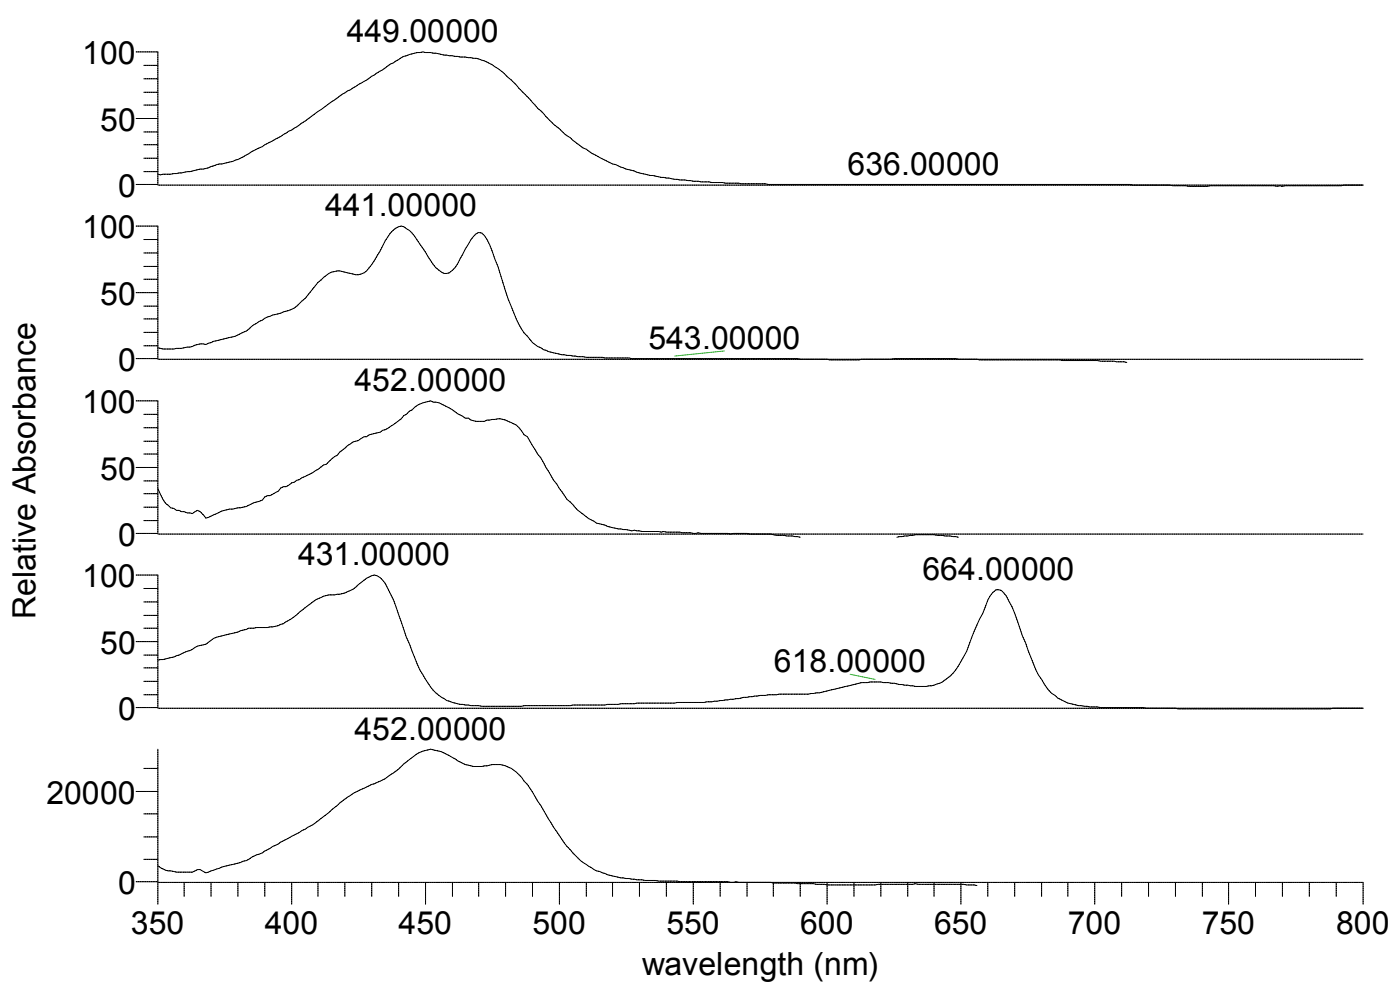NL:  
2.08E5  
36#6191 RT:  
20.64 AV: 1NL:  
3.60E4  
36#6483 RT:  
21.61 AV: 1NL:  
5.59E3  
36#7321 RT:  
24.40 AV: 1NL:  
3.31E5  
36#10776  
RT: 35.92  
AV: 1NL:  
2.92E4  
36#13018  
RT: 43.39  
AV: 1

Supplement: Data_Sheet_1.zip [file Muestra36_HPLC-UV.pdf › Carotenoids/Muestra36_HPLC-UV.pdf]

RT: 0.00 - 61.20

NL:  
2.09E5  
Total Scan  
PDA 37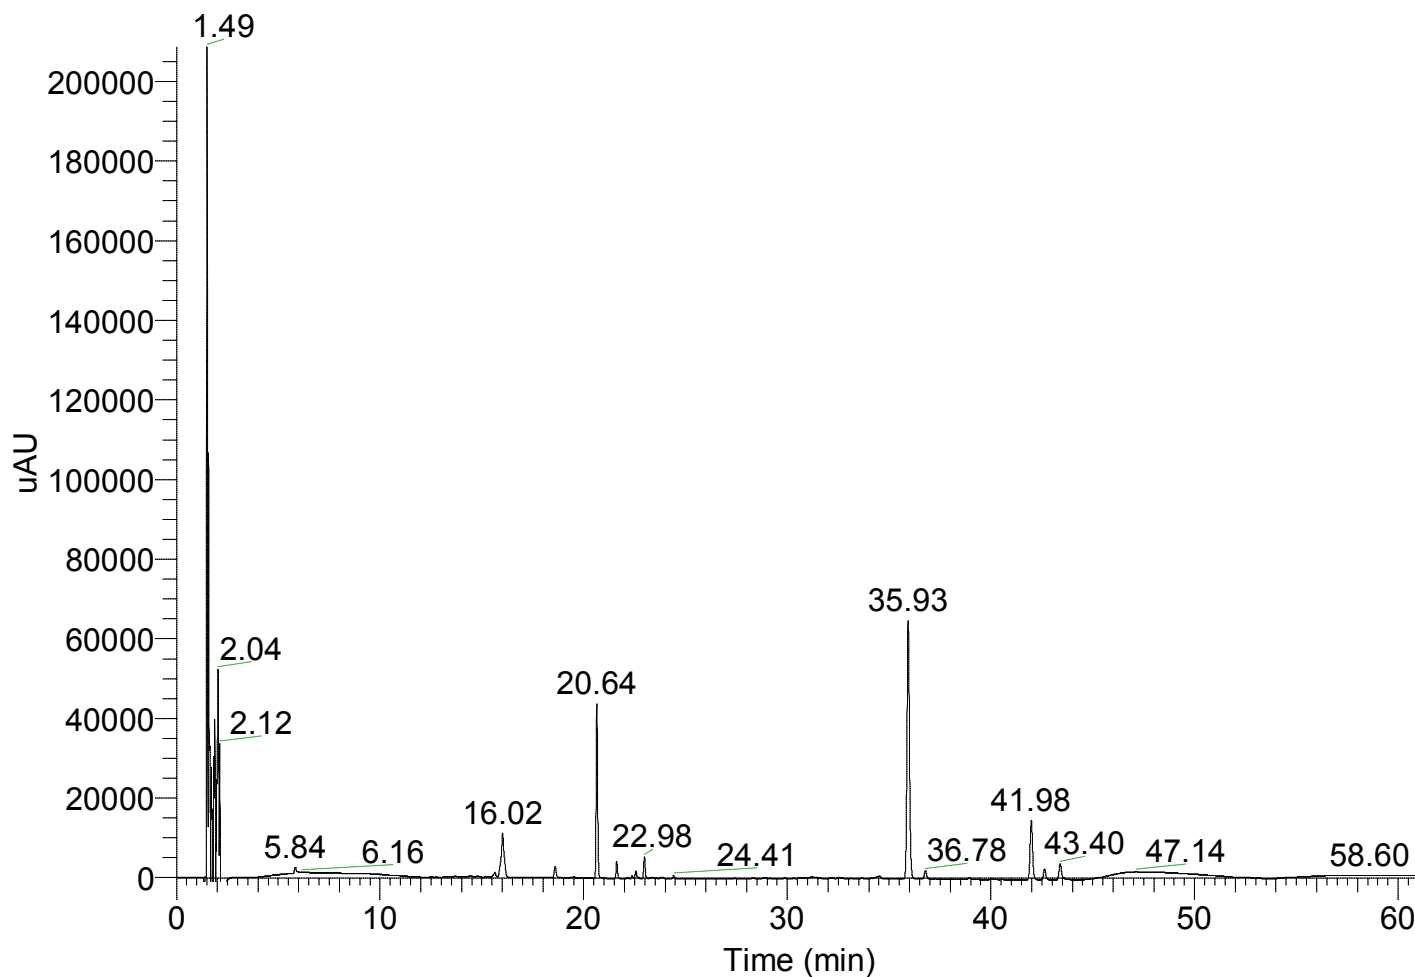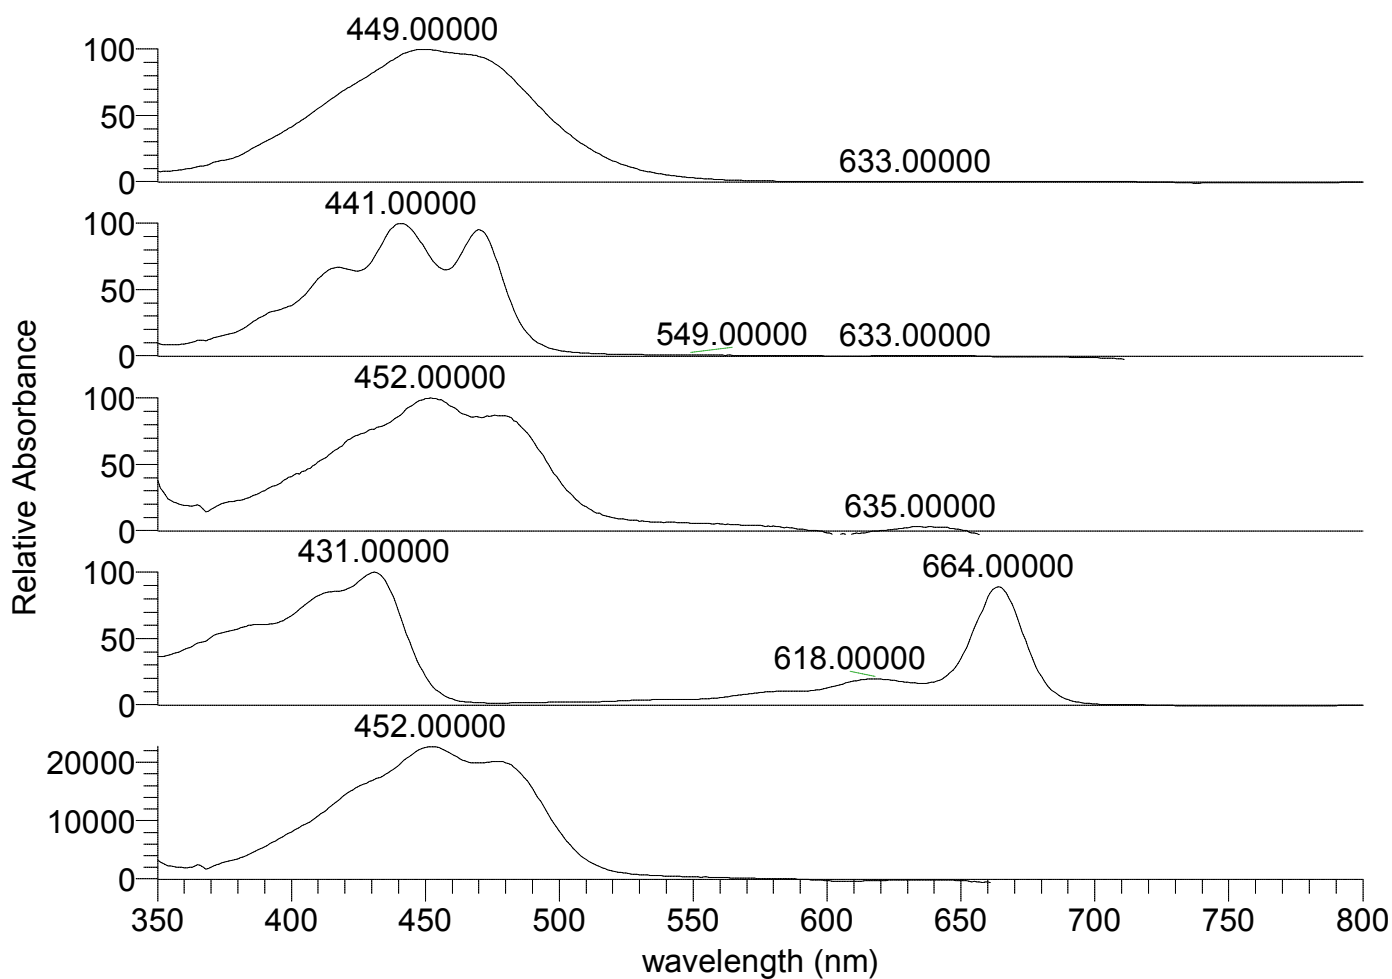

Supplement: Data_Sheet_1.zip [file Muestra37_HPLC-UV.pdf › Carotenoids/Muestra37_HPLC-UV.pdf]

RT: 0.00 - 61.20

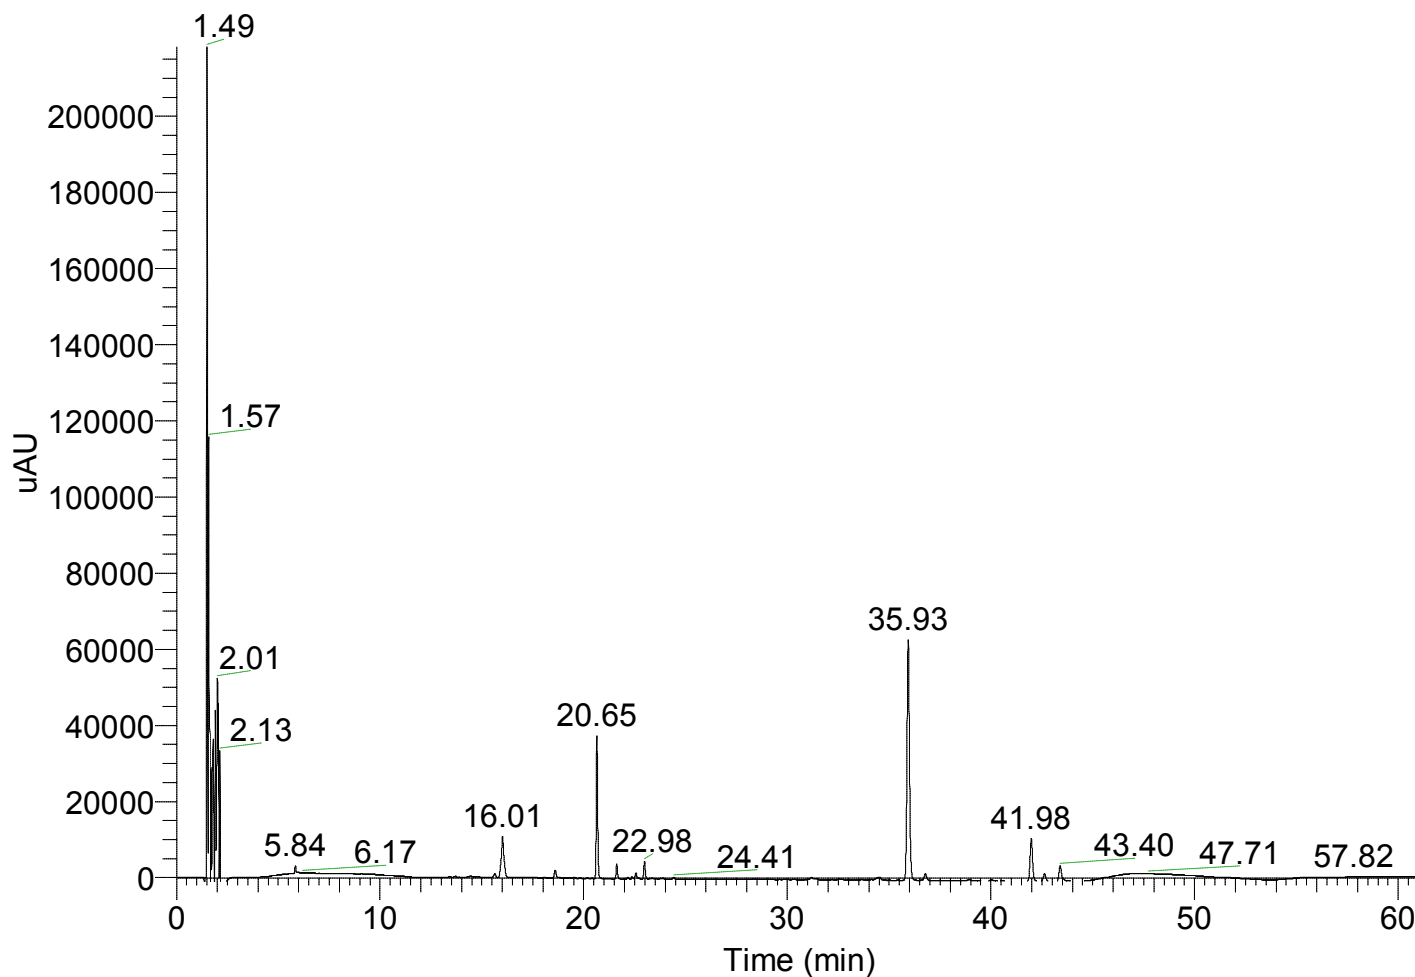

NL:  
2.18E5  
Total Scan  
PDA 38

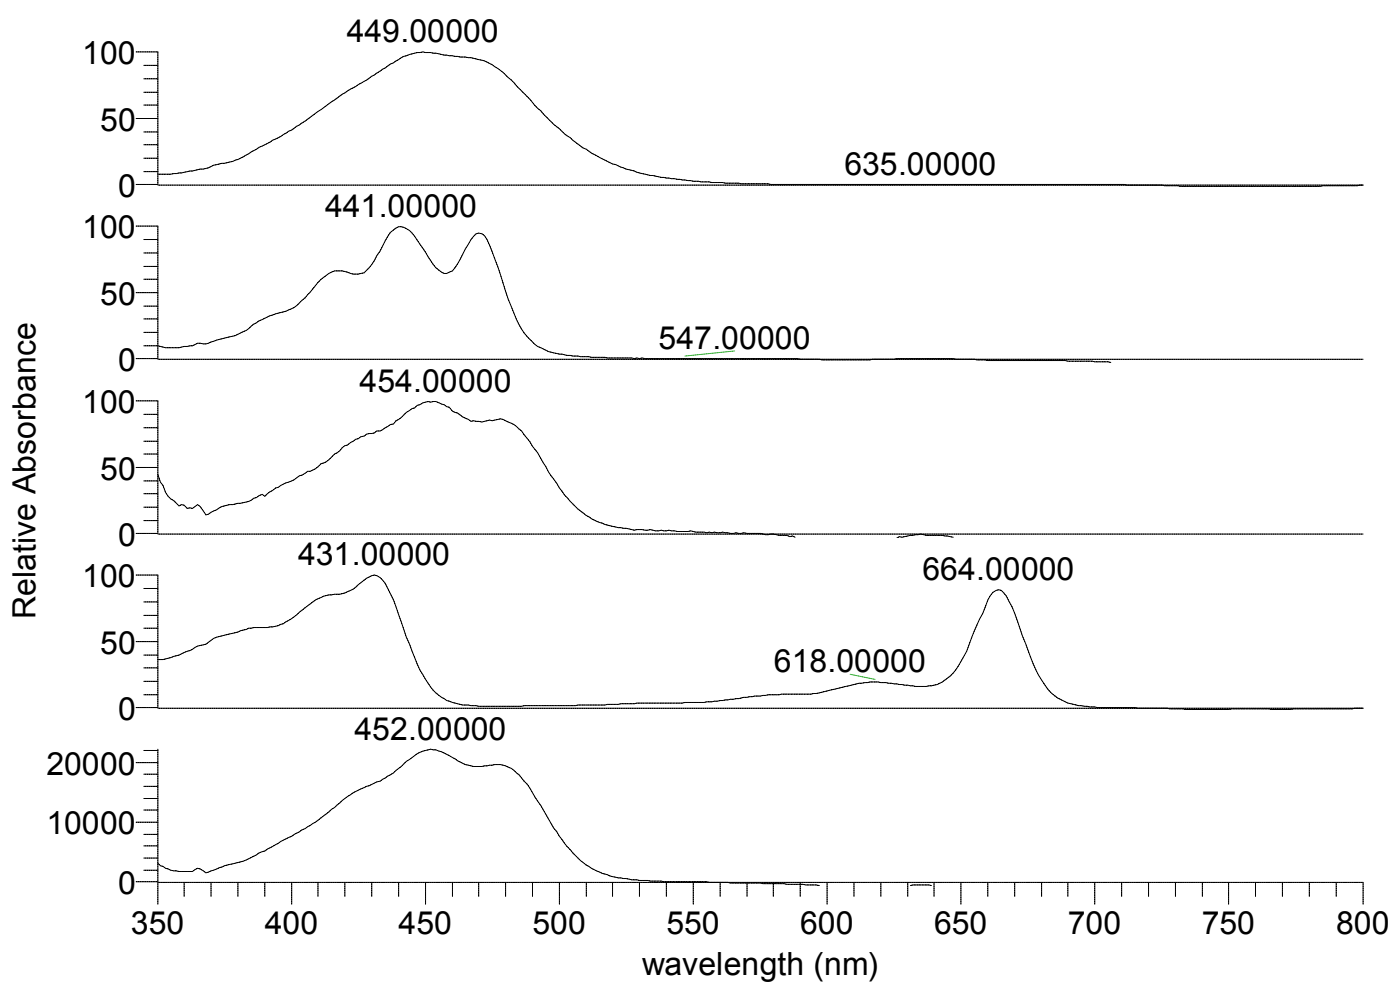

NL:  
1.76E5  
38#6195 RT:  
20.65 AV: 1

NL:  
2.70E4  
38#6486 RT:  
21.62 AV: 1

NL:  
4.03E3  
38#7324 RT:  
24.41 AV: 1

NL:  
2.80E5  
38#10779  
RT: 35.93  
AV: 1

NL:  
2.22E4  
38#13020  
RT: 43.40  
AV: 1

Supplement: Data_Sheet_1.zip [file Muestra38_HPLC-UV.pdf › Carotenoids/Muestra38_HPLC-UV.pdf]

RT: 0.00 - 61.20

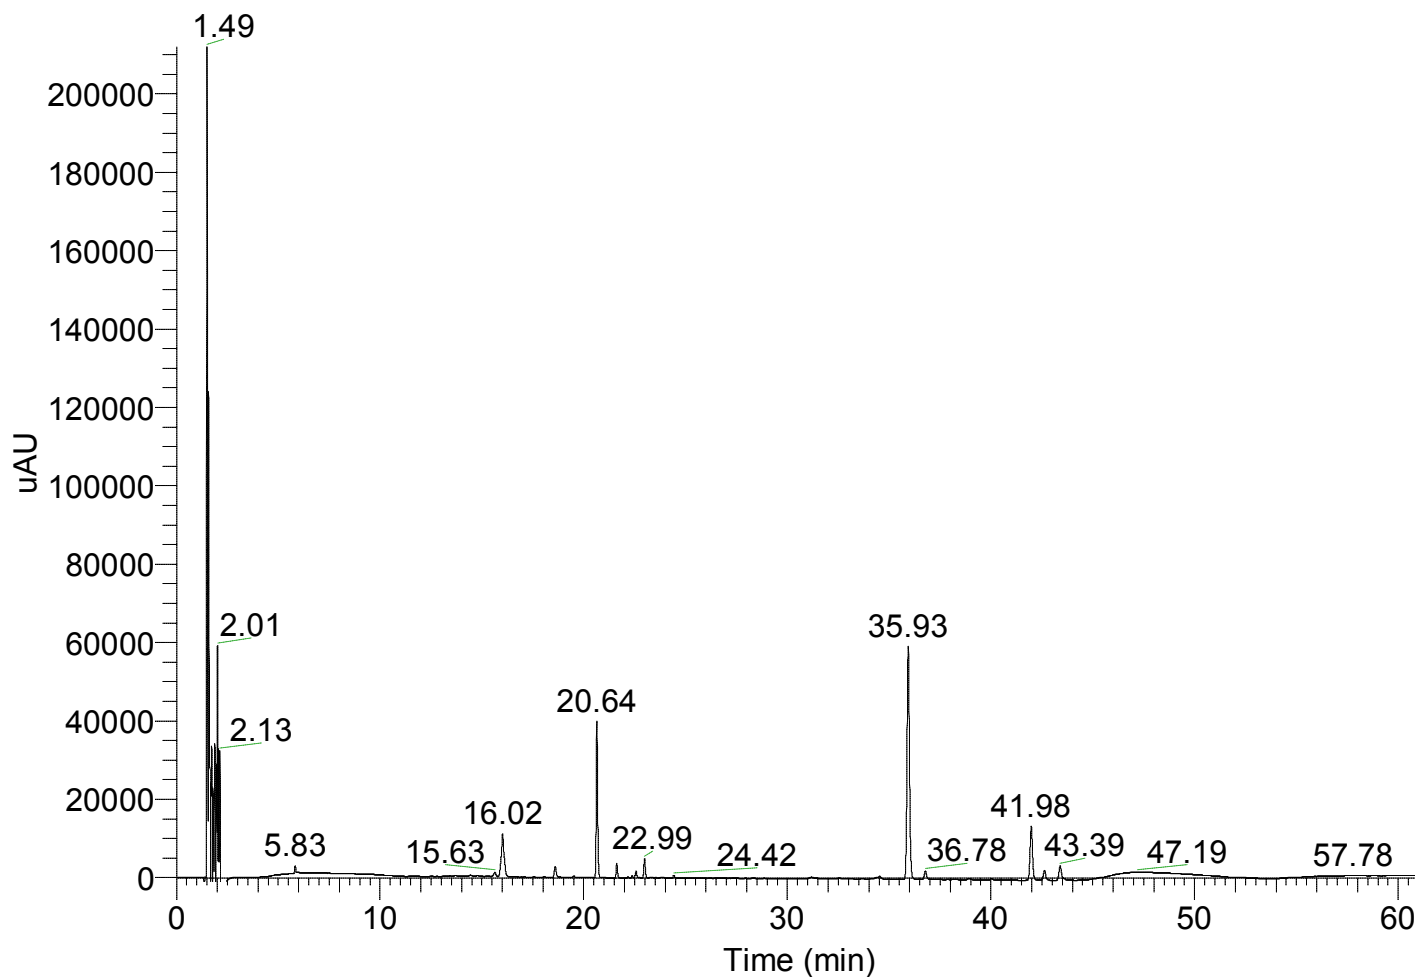

NL:  
2.12E5  
Total Scan  
PDA 39

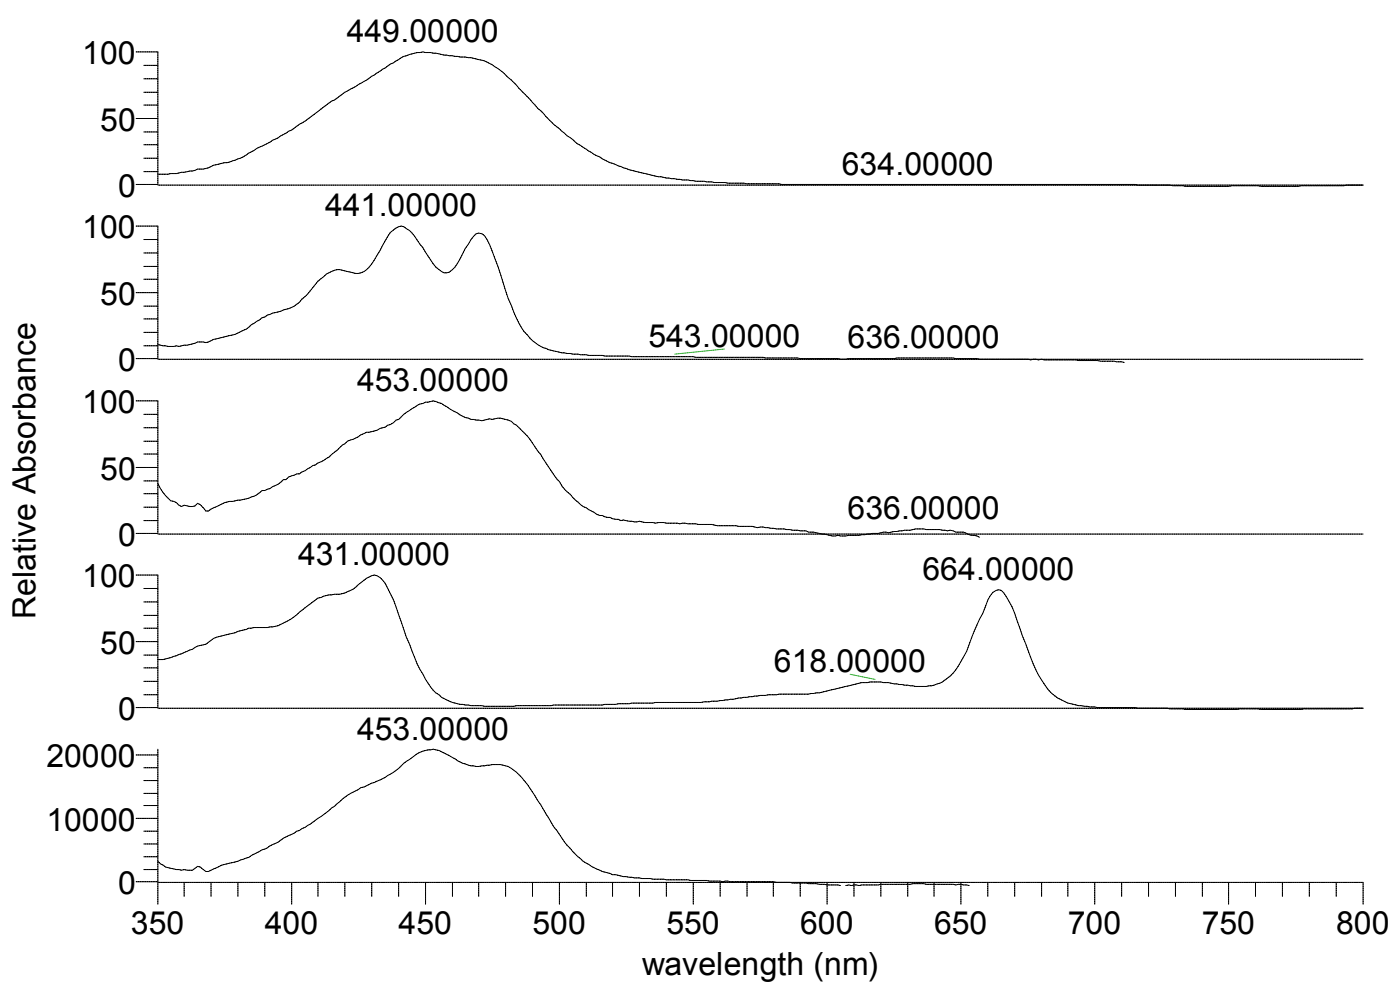

NL:  
1.89E5  
39#6193 RT:  
20.64 AV: 1

NL:  
2.53E4  
39#6486 RT:  
21.62 AV: 1

NL:  
5.46E3  
39#7326 RT:  
24.42 AV: 1

NL:  
2.64E5  
39#10780  
RT: 35.93  
AV: 1

NL:  
2.09E4  
39#13017  
RT: 43.39  
AV: 1

Supplement: Data_Sheet_1.zip [file Muestra39_HPLC-UV.pdf › Carotenoids/Muestra39_HPLC-UV.pdf]

RT: 14.43 - 45.58

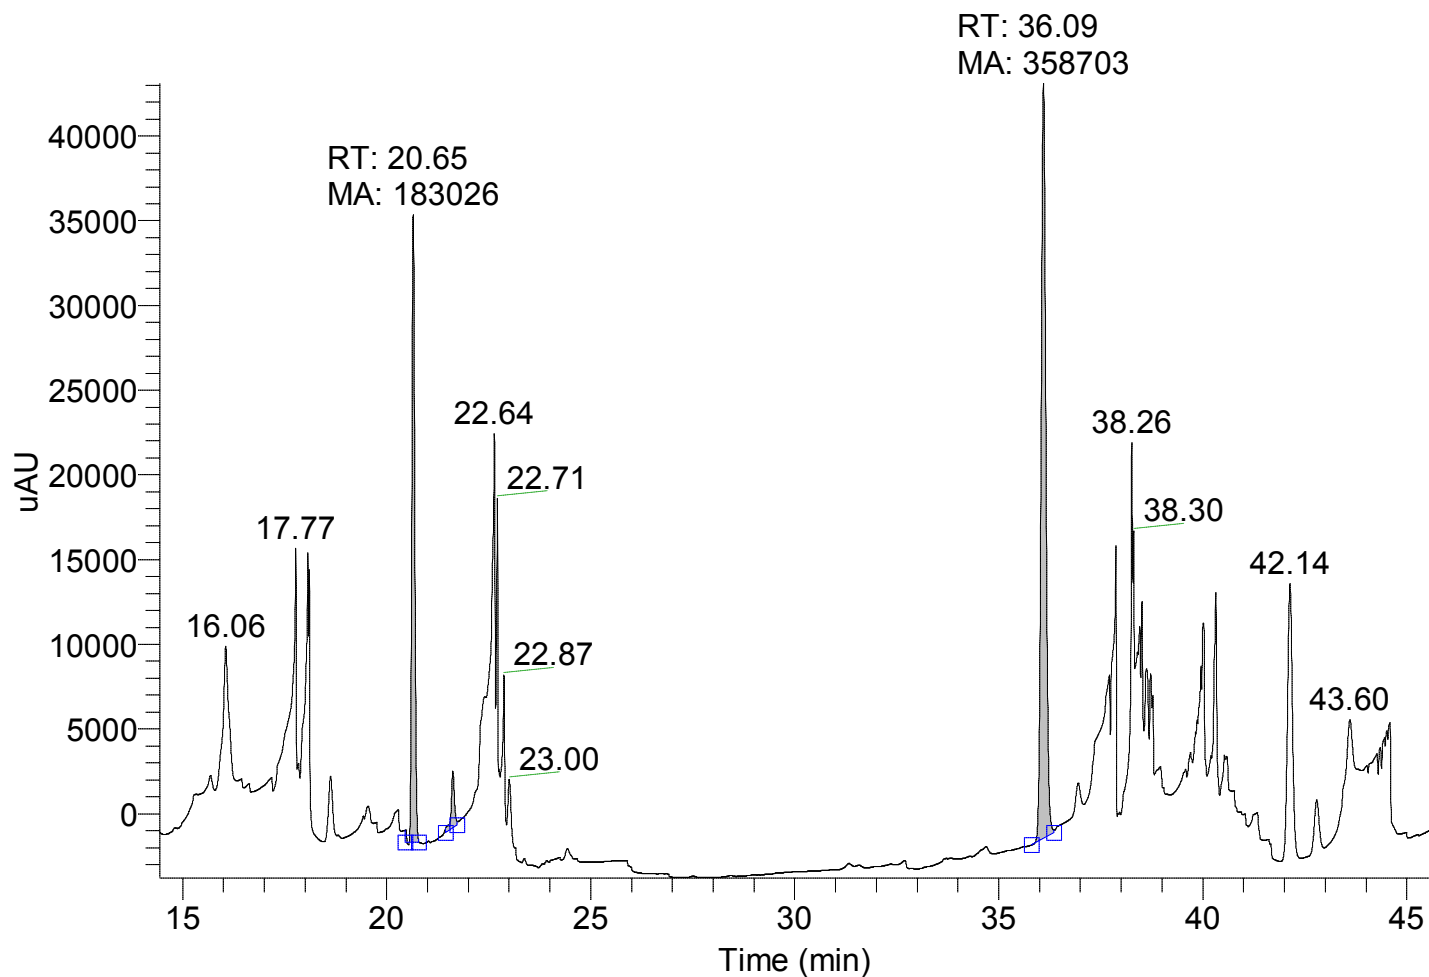

NL:  
4.31E4  
Total Scan  
PDA  
Muestra3

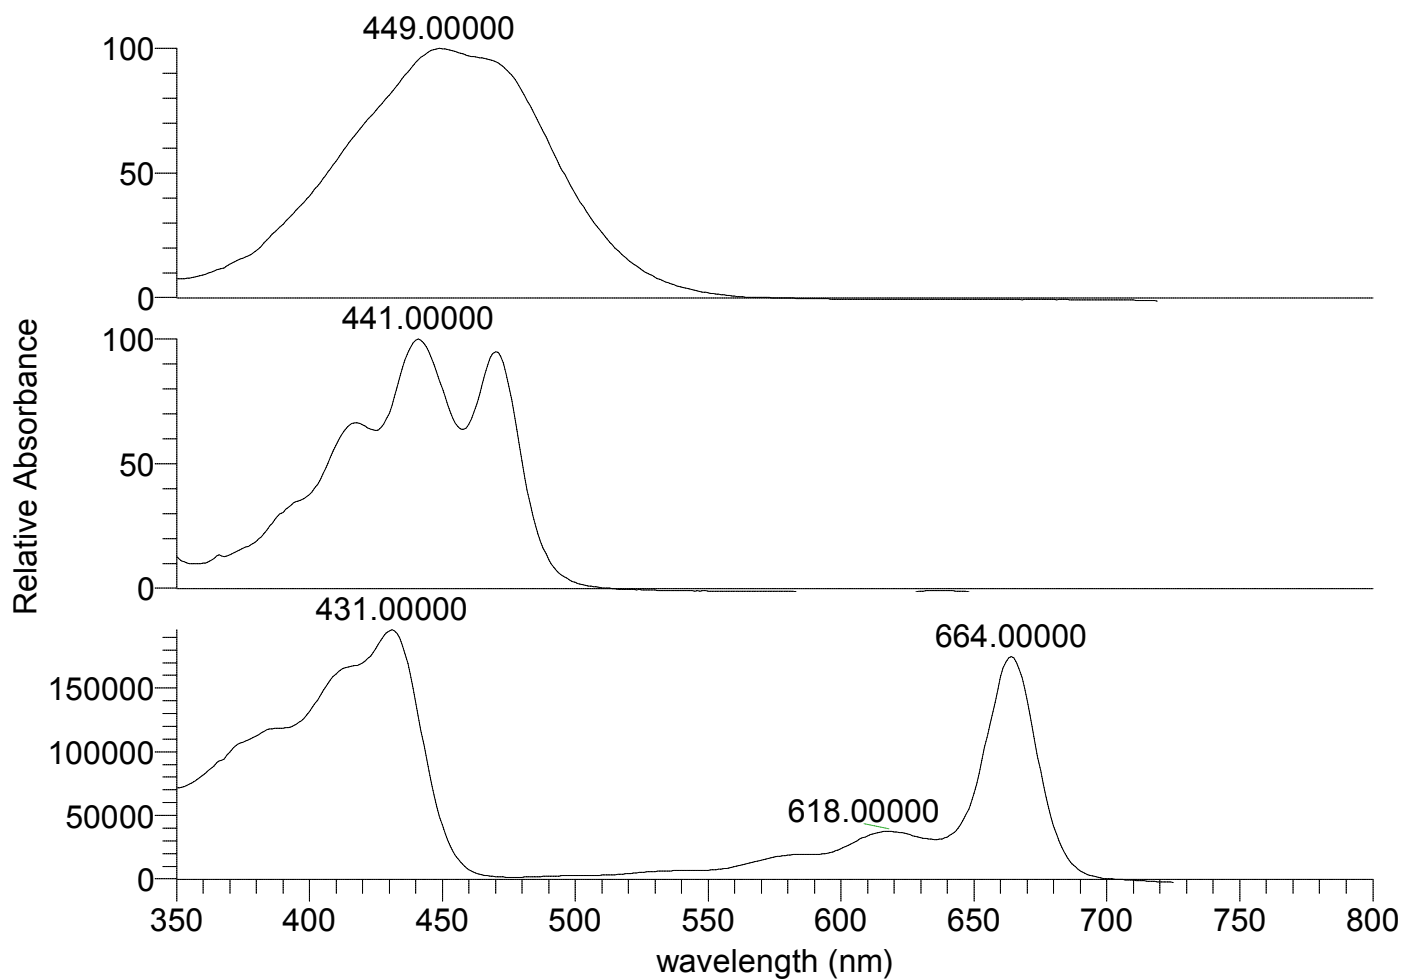

NL:  
1.74E5  
Muestra3#61  
95 RT:  
20.65 AV: 1

NL:  
1.83E4  
Muestra3#64  
82 RT:  
21.61 AV: 1

NL:  
1.96E5  
Muestra3#10  
827 RT:  
36.09 AV: 1

Supplement: Data_Sheet_1.zip [file Muestra3_HPLC-UV.pdf › Carotenoids/Muestra3_HPLC-UV.pdf]

RT: 0.00 - 61.20

NL:  
2.11E5  
Total Scan  
PDA 40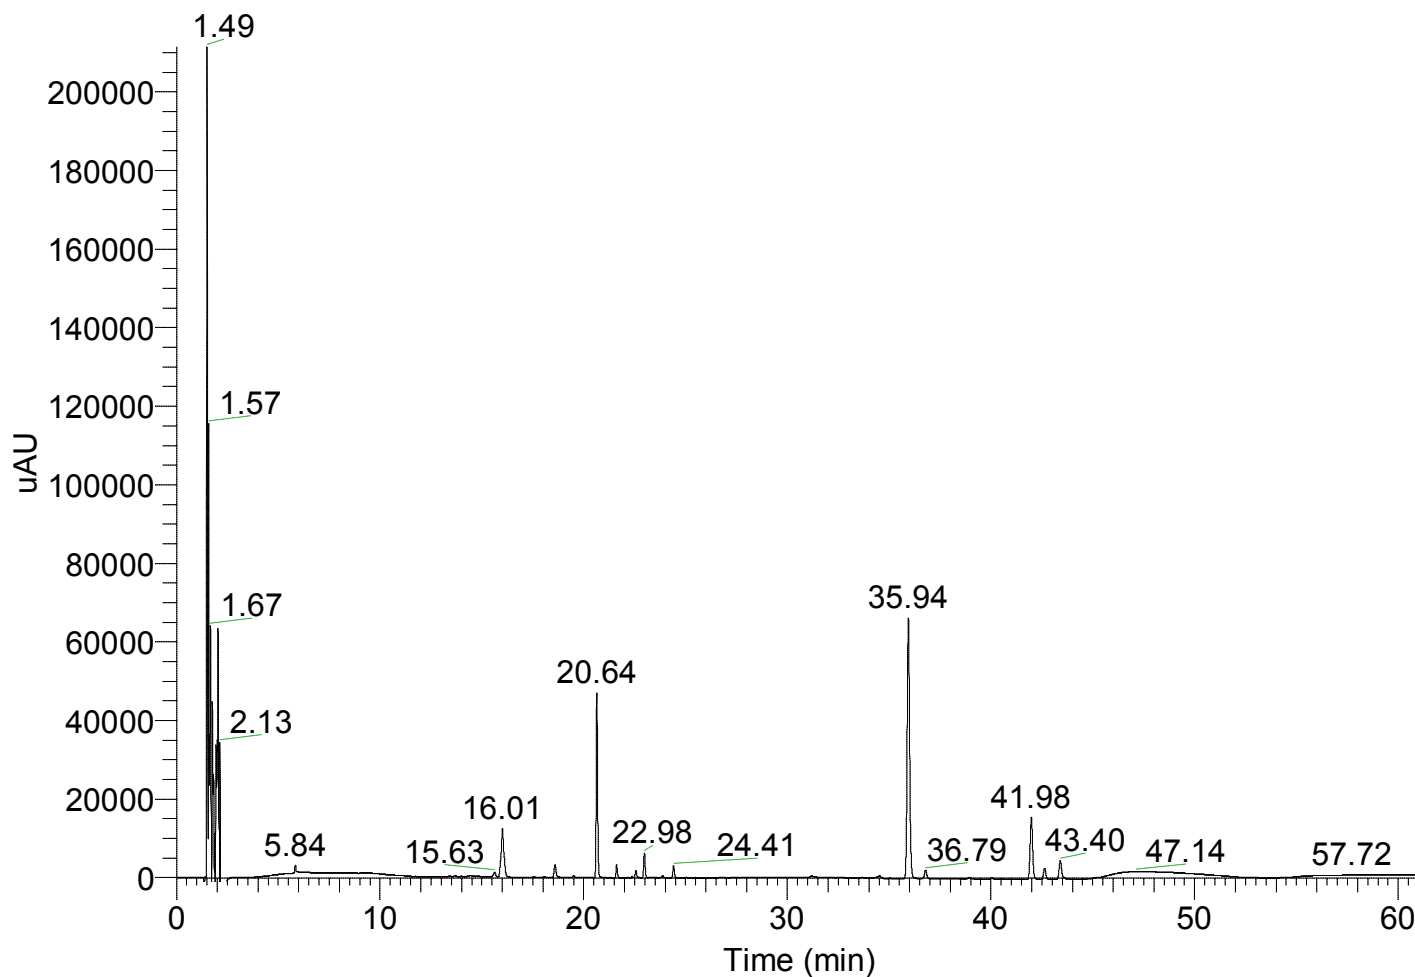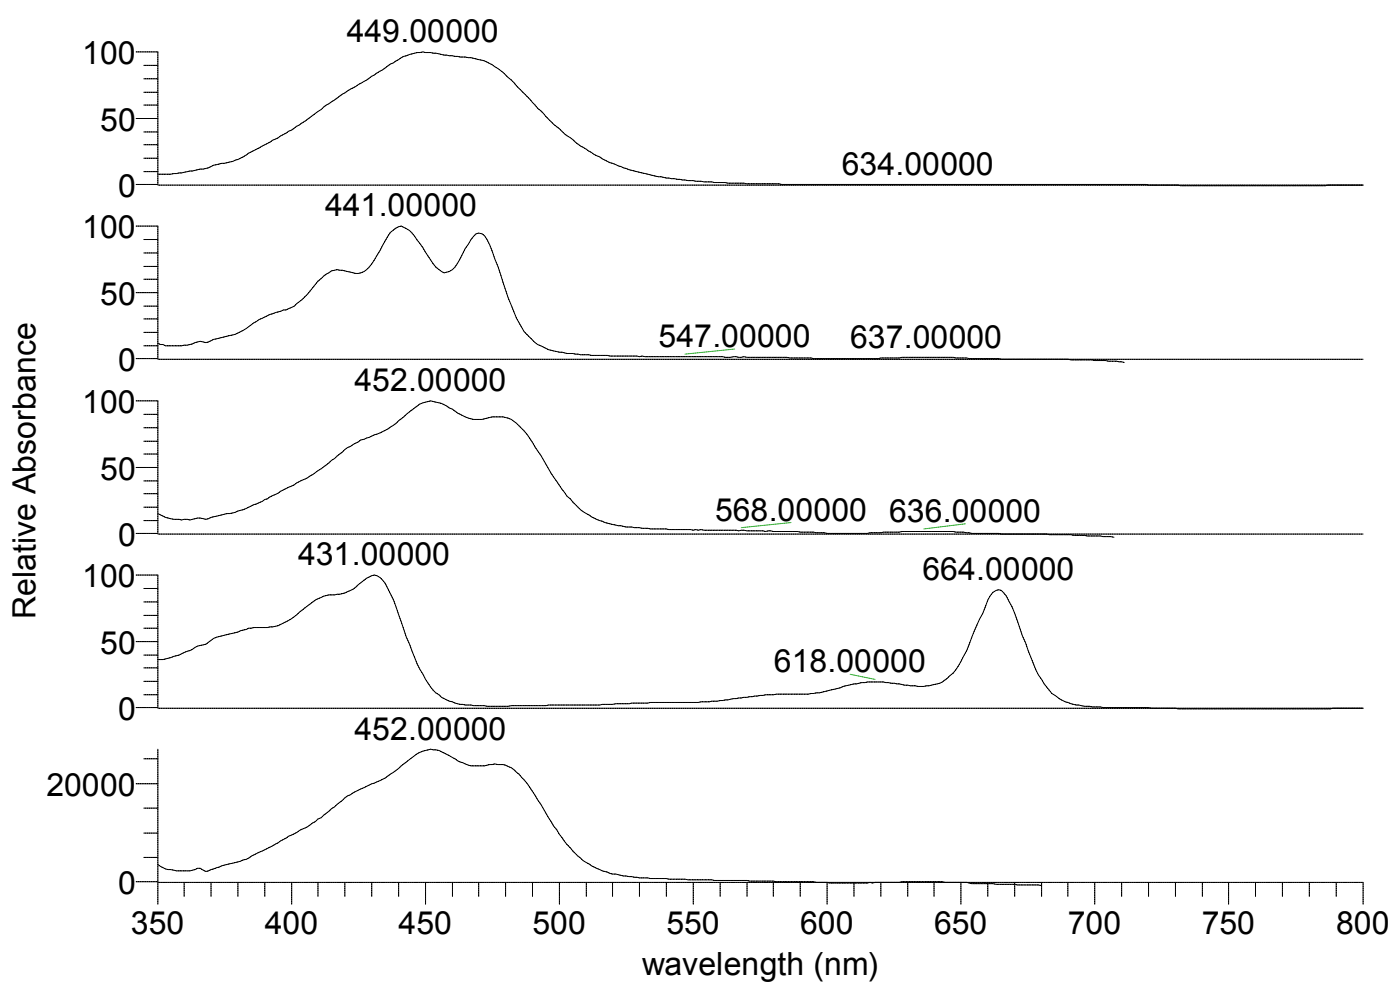NL:  
2.22E5  
40#6193 RT:  
20.64 AV: 1NL:  
2.28E4  
40#6484 RT:  
21.61 AV: 1NL:  
1.82E4  
40#7323 RT:  
24.41 AV: 1NL:  
2.94E5  
40#10783  
RT: 35.94  
AV: 1NL:  
2.69E4  
40#13020  
RT: 43.40  
AV: 1

Supplement: Data_Sheet_1.zip [file Muestra40_HPLC-UV.pdf › Carotenoids/Muestra40_HPLC-UV.pdf]

RT: 0.00 - 61.20

NL:  
2.11E5  
Total Scan  
PDA 41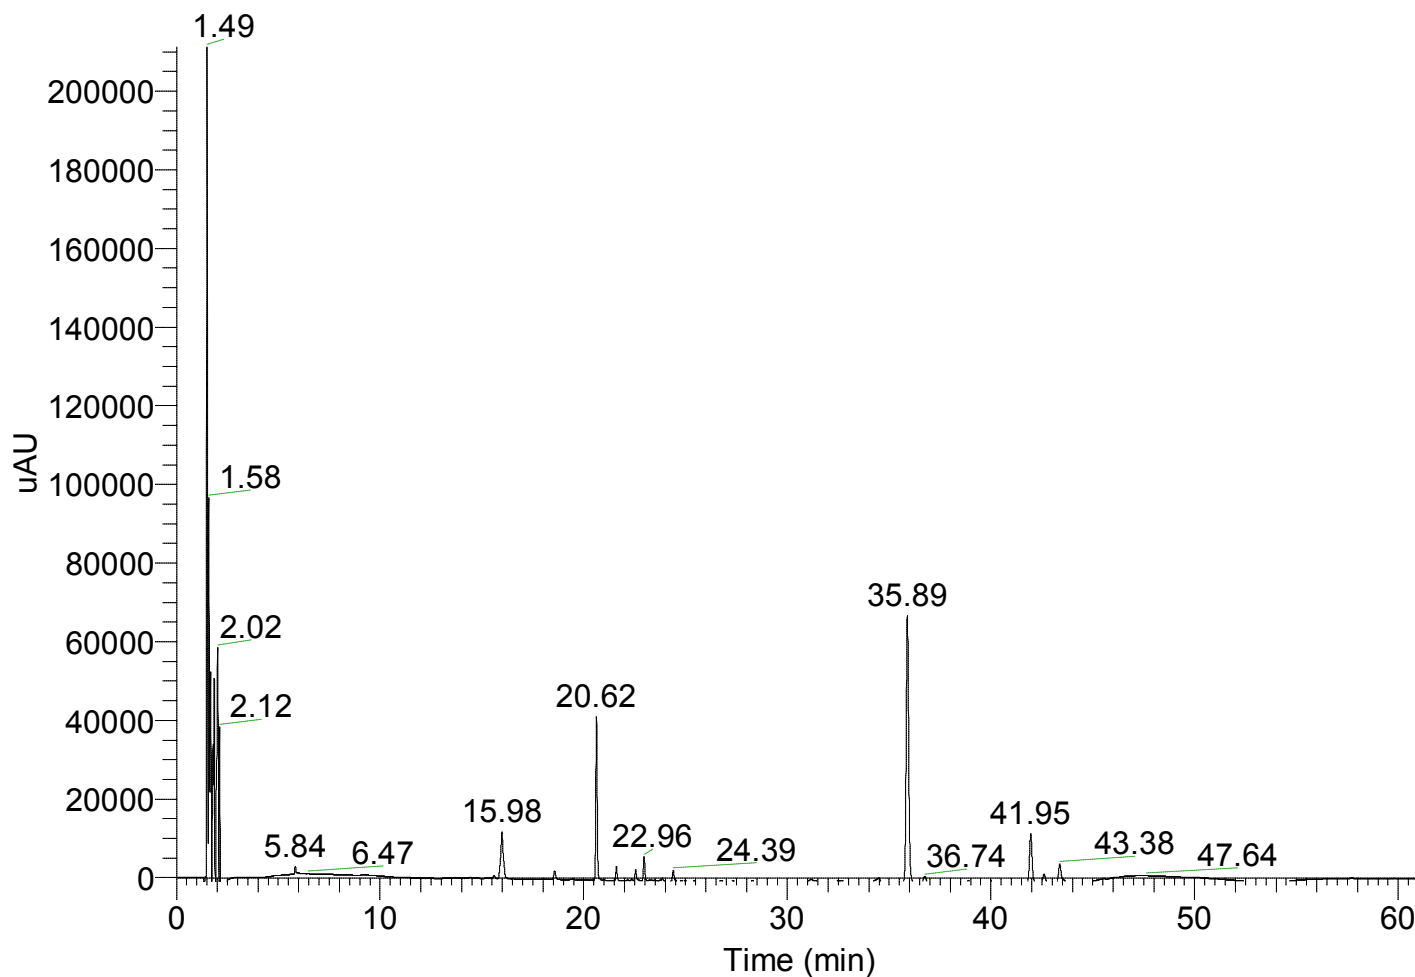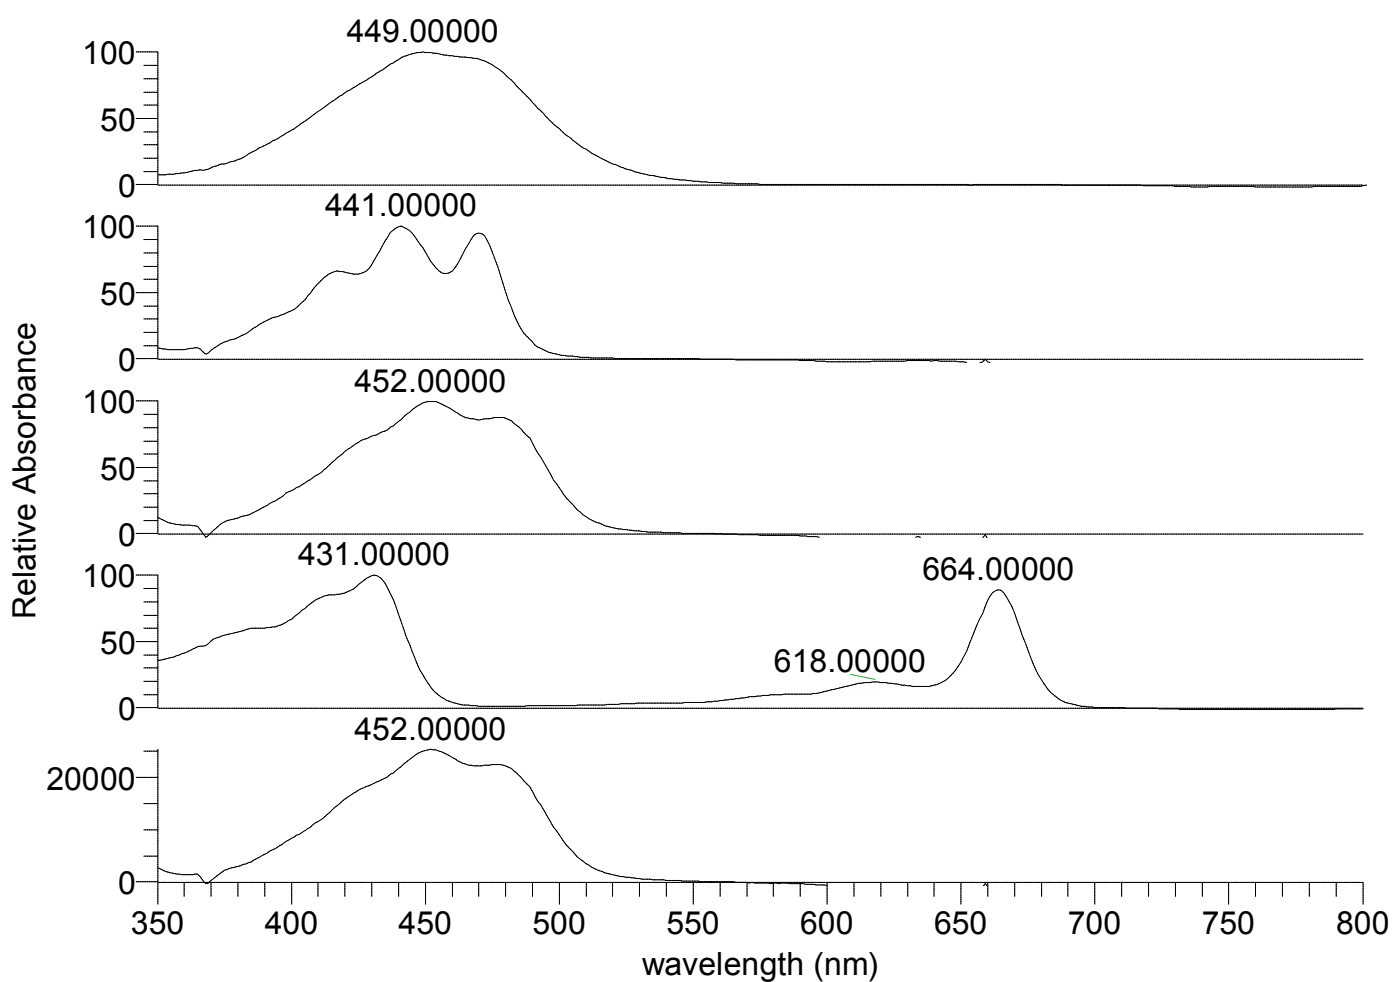NL:  
1.91E5  
41#6185 RT:  
20.62 AV: 1NL:  
2.40E4  
41#6481 RT:  
21.60 AV: 1NL:  
1.55E4  
41#7317 RT:  
24.39 AV: 1NL:  
2.99E5  
41#10769  
RT: 35.90  
AV: 1NL:  
2.53E4  
41#13015  
RT: 43.38  
AV: 1

Supplement: Data_Sheet_1.zip [file Muestra41_HPLC-UV.pdf › Carotenoids/Muestra41_HPLC-UV.pdf]

RT: 0.00 - 61.20

NL:  
2.14E5  
Total Scan  
PDA 42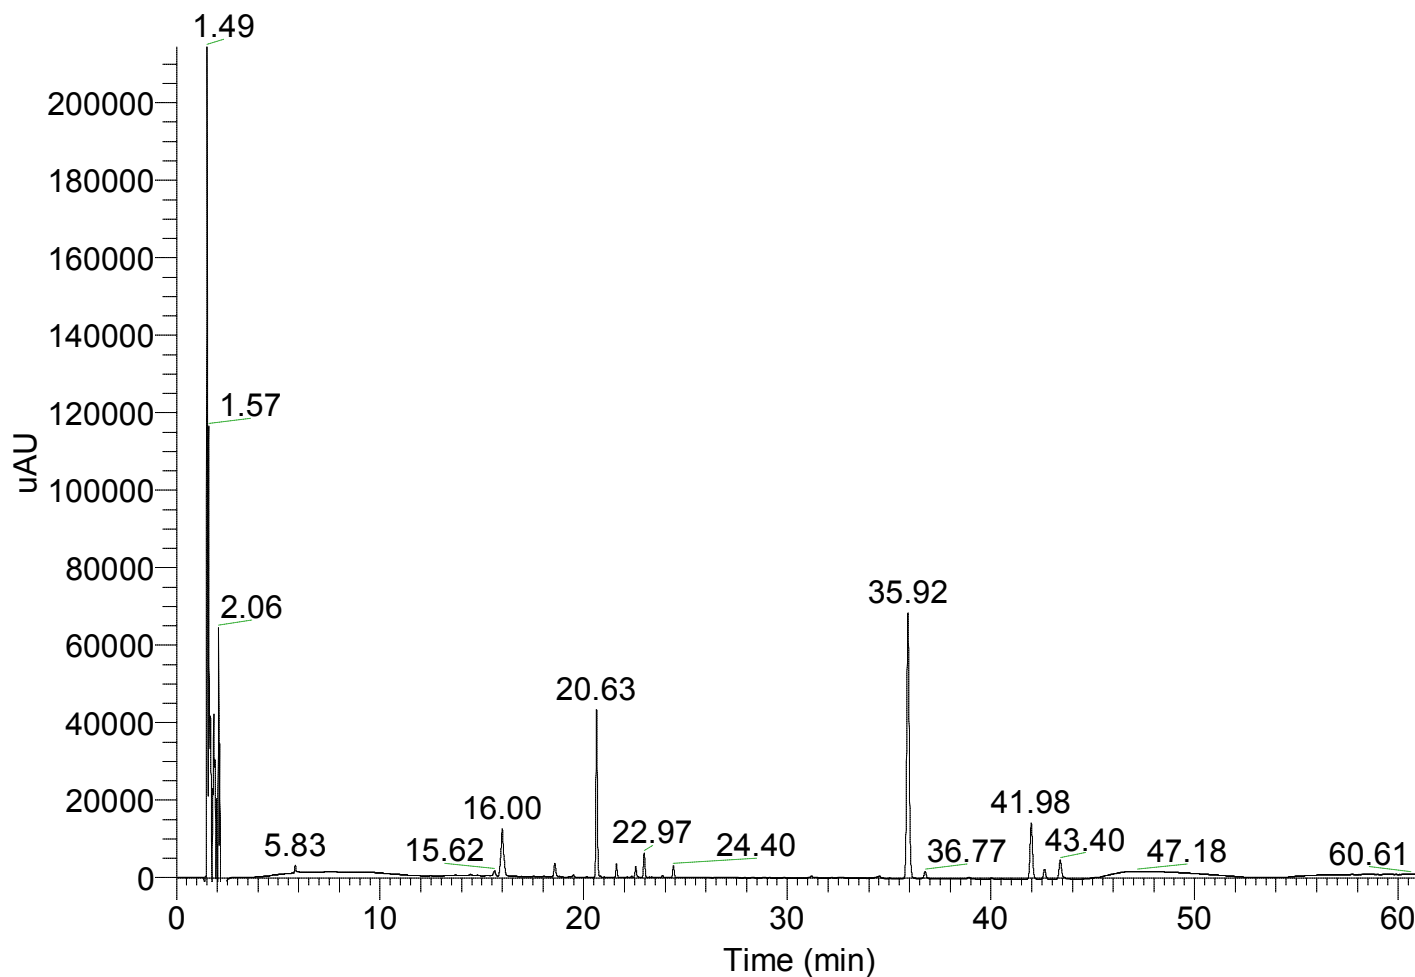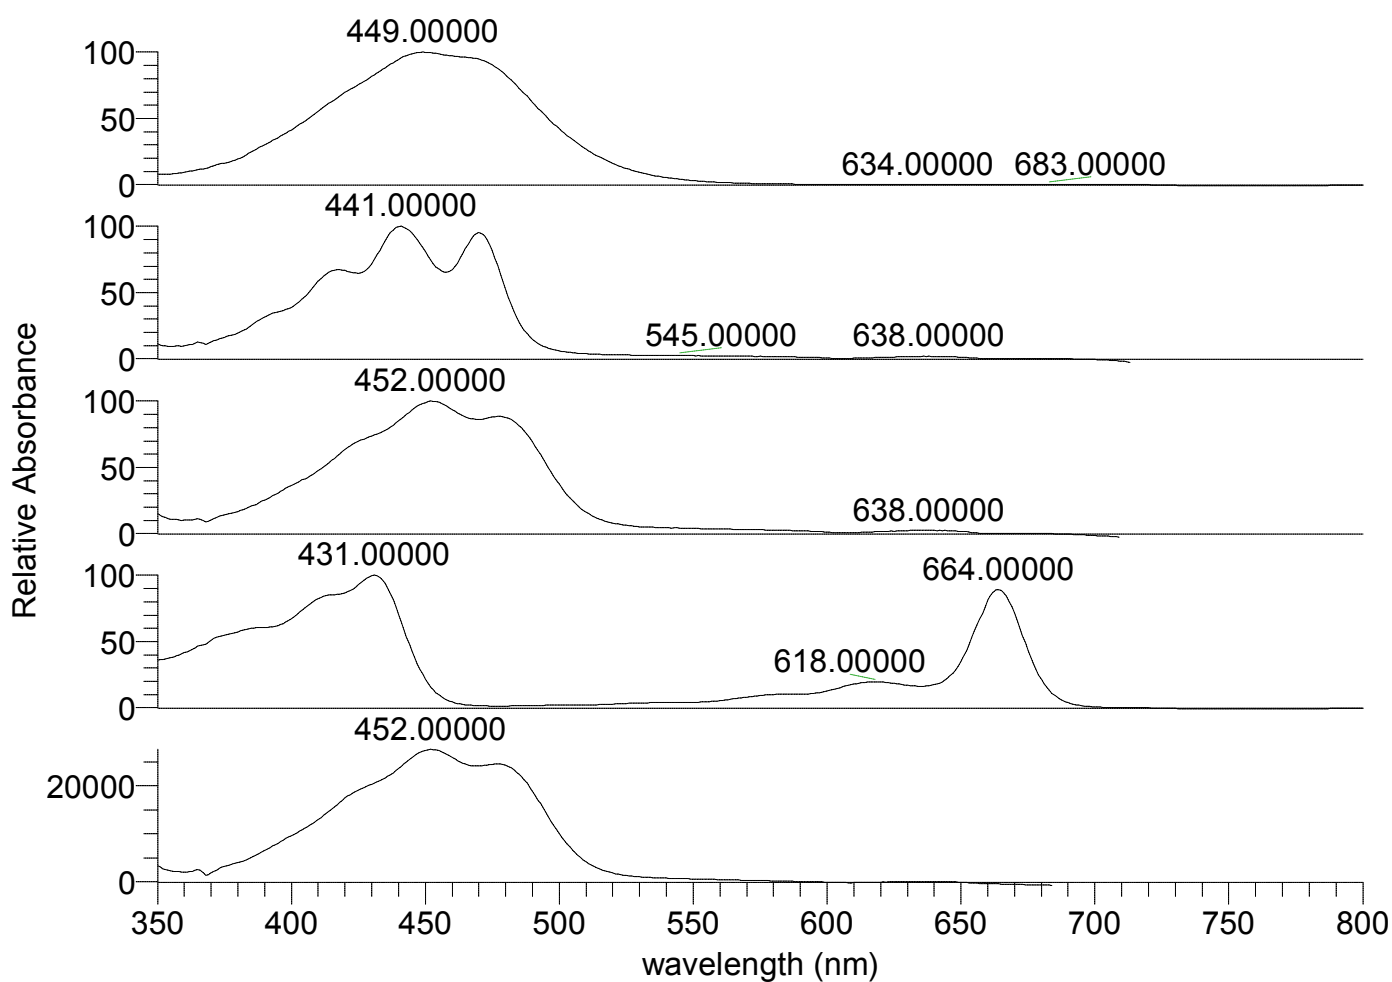NL:  
2.04E5  
42#6190 RT:  
20.63 AV: 1NL:  
2.34E4  
42#6481 RT:  
21.60 AV: 1NL:  
1.76E4  
42#7319 RT:  
24.40 AV: 1NL:  
3.05E5  
42#10776  
RT: 35.92  
AV: 1NL:  
2.76E4  
42#13020  
RT: 43.40  
AV: 1

Supplement: Data_Sheet_1.zip [file Muestra42_HPLC-UV.pdf › Carotenoids/Muestra42_HPLC-UV.pdf]

RT: 0.00 - 61.23

NL:  
2.11E5  
Total Scan  
PDA 43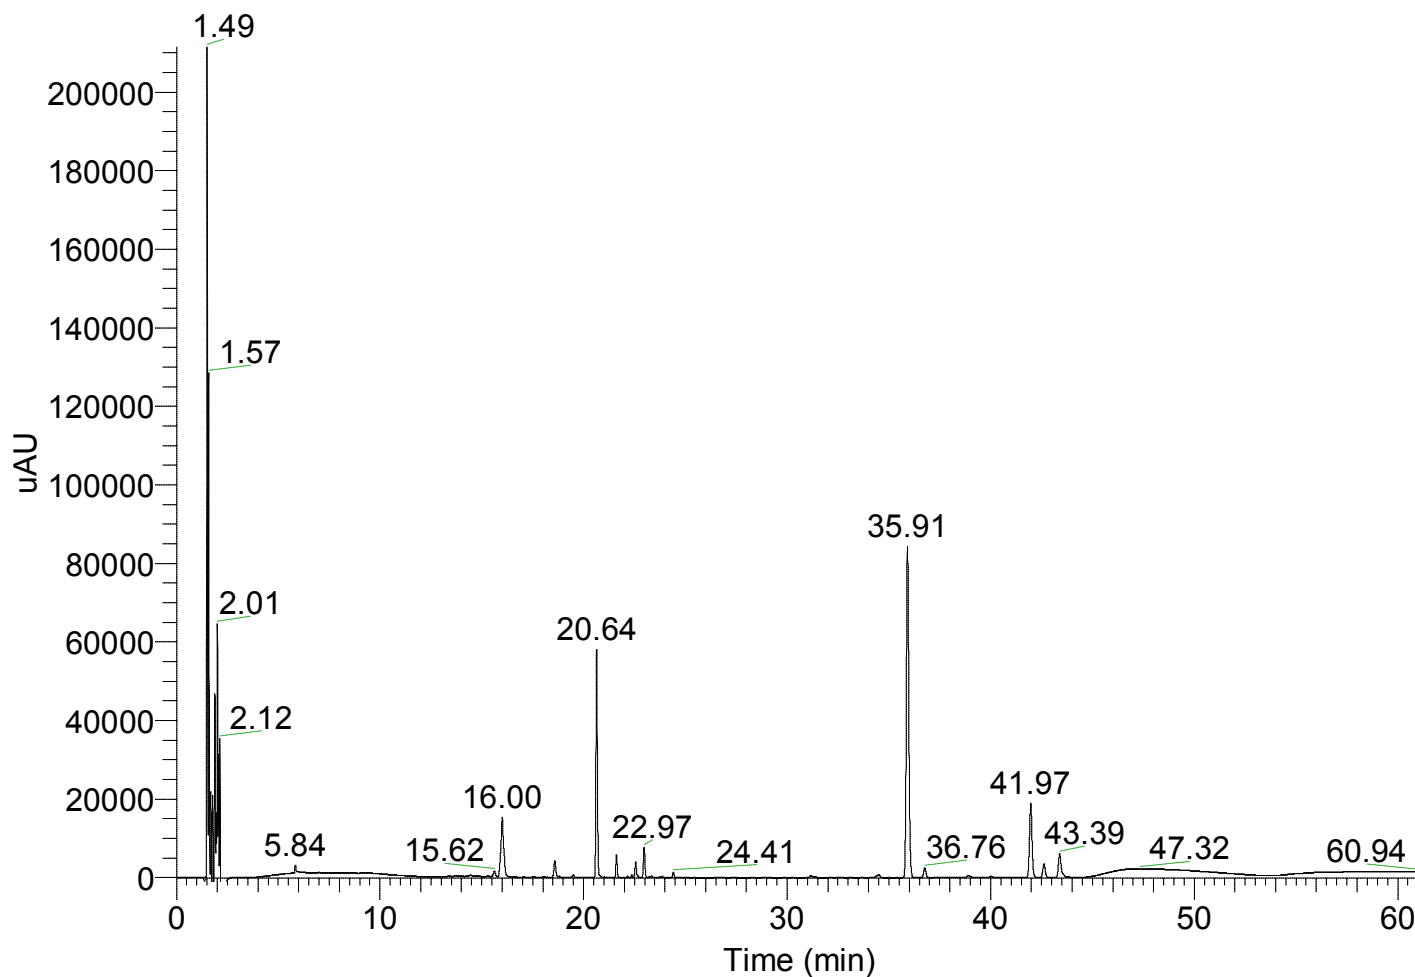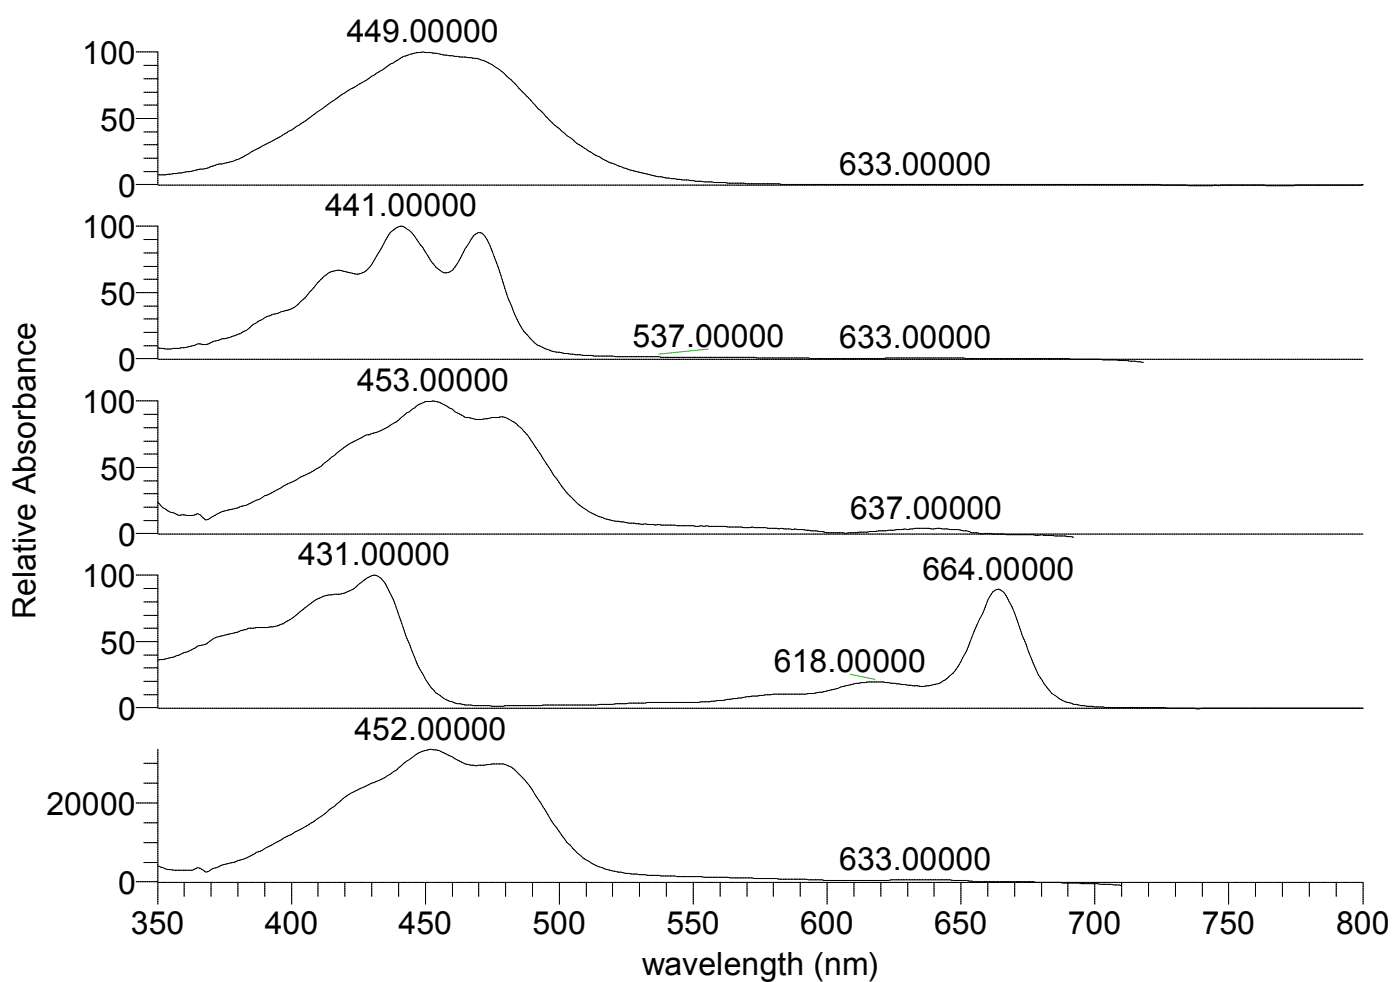

NL:  
2.74E5  
43#13016  
RT: 43.39  
AV: 1  
NL:  
3.85E4  
43#6485 RT:  
21.62 AV: 1  
NL:  
9.16E3  
43#7323 RT:  
24.41 AV: 1  
NL:  
3.73E5  
43#10773  
RT: 35.91  
AV: 1  
NL:  
3.35E4  
43#13016  
RT: 43.39  
AV: 1

Supplement: Data_Sheet_1.zip [file Muestra43_HPLC-UV.pdf › Carotenoids/Muestra43_HPLC-UV.pdf]

RT: 0.00 - 61.20

NL:  
2.12E5  
Total Scan  
PDA 44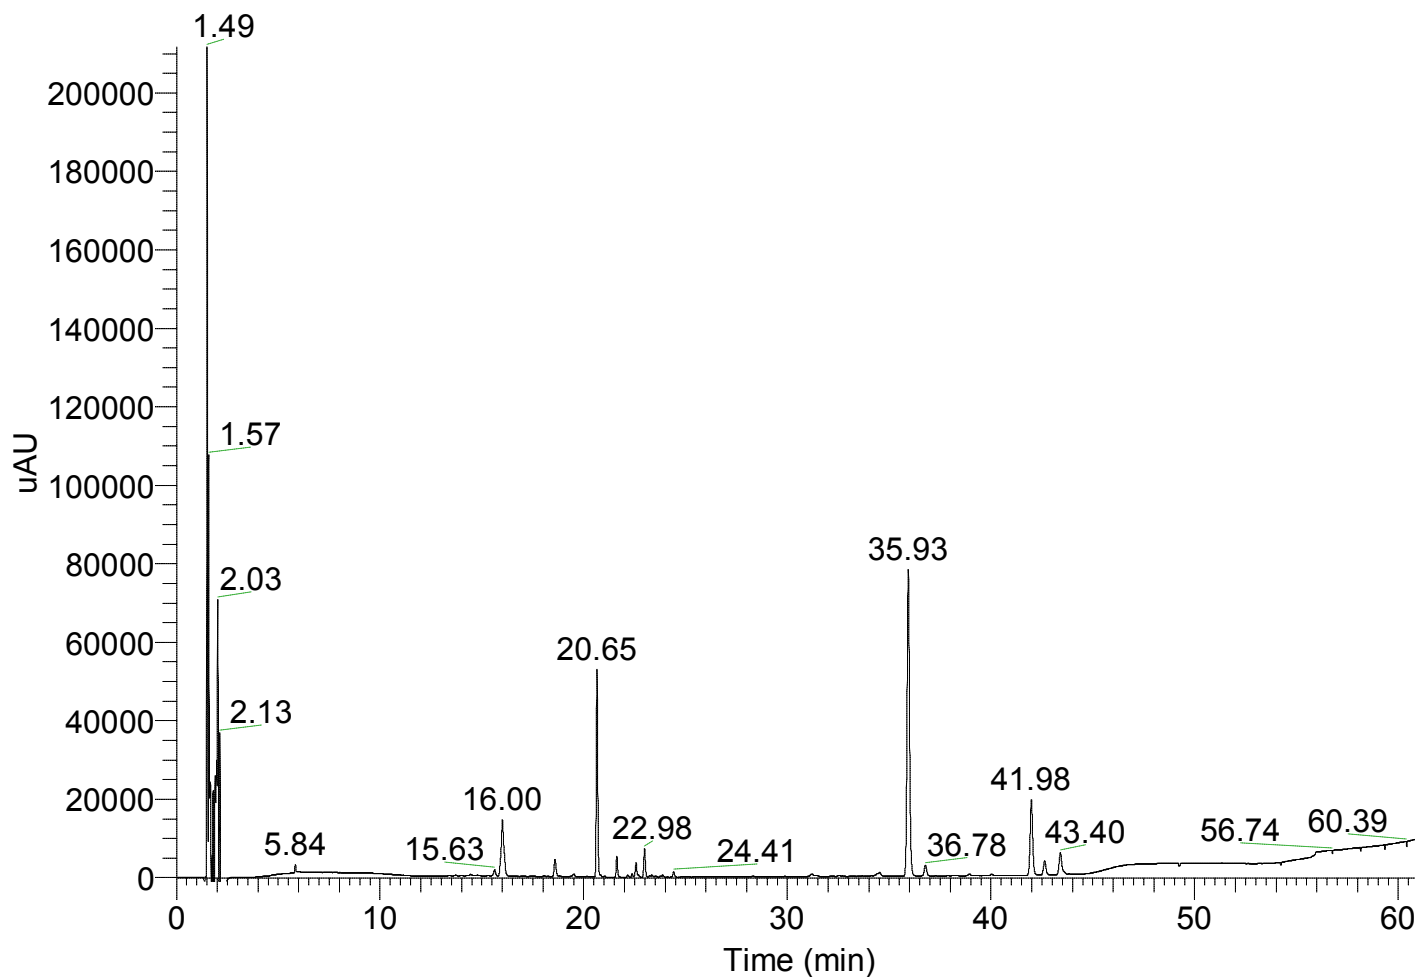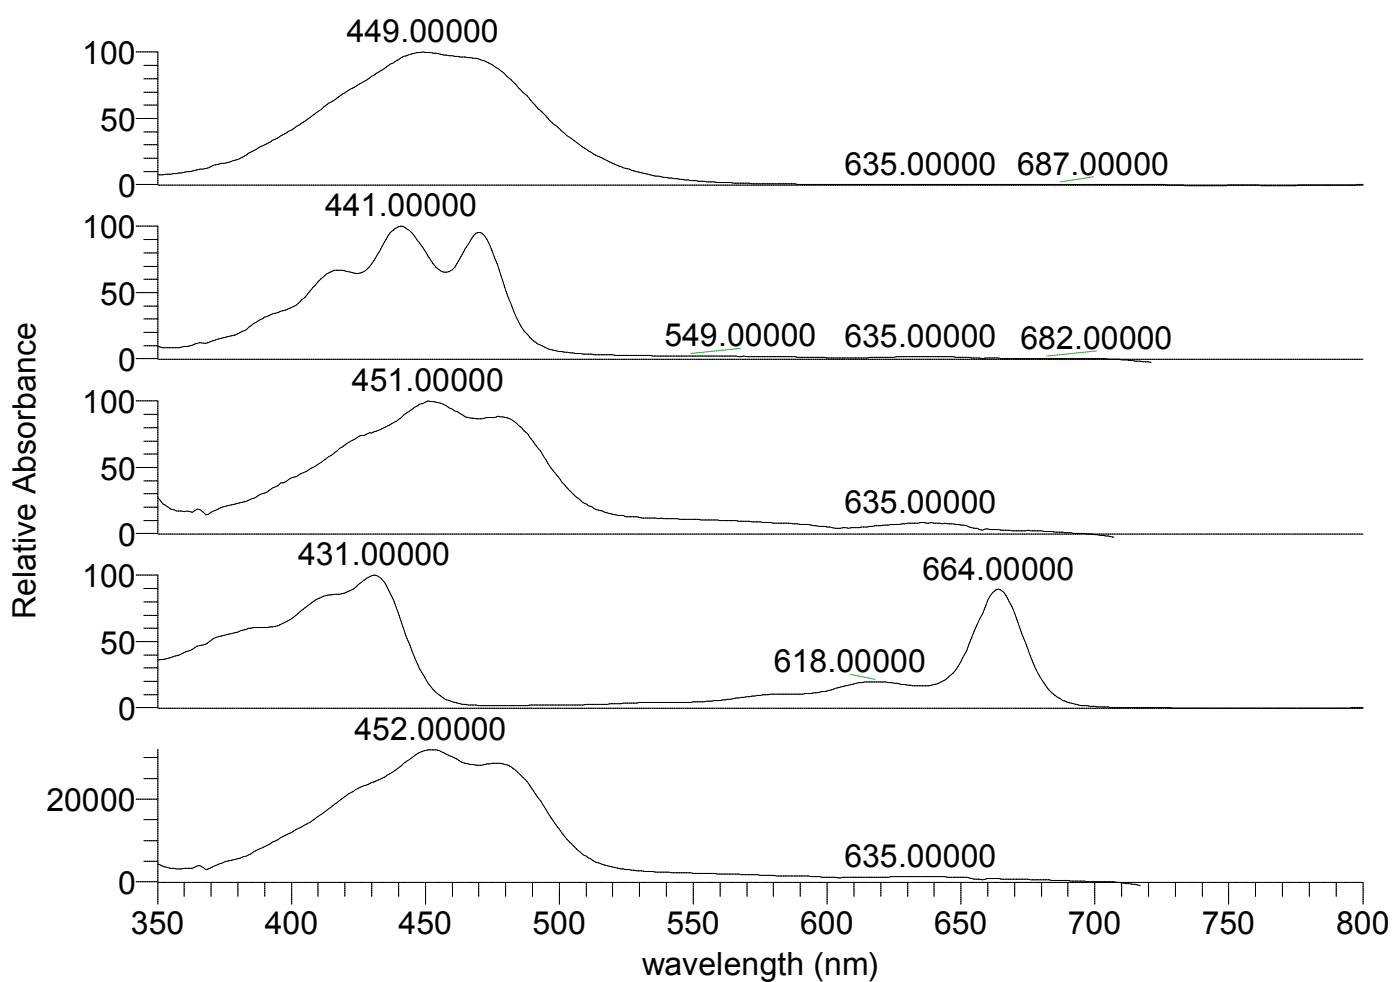NL:  
2.50E5  
44#6194 RT:  
20.65 AV: 1NL:  
3.48E4  
44#6486 RT:  
21.62 AV: 1NL:  
8.39E3  
44#7323 RT:  
24.41 AV: 1NL:  
3.47E5  
44#10780  
RT: 35.93  
AV: 1NL:  
3.20E4  
44#13020  
RT: 43.40  
AV: 1

Supplement: Data_Sheet_1.zip [file Muestra44_HPLC-UV.pdf › Carotenoids/Muestra44_HPLC-UV.pdf]

RT: 0.00 - 61.20

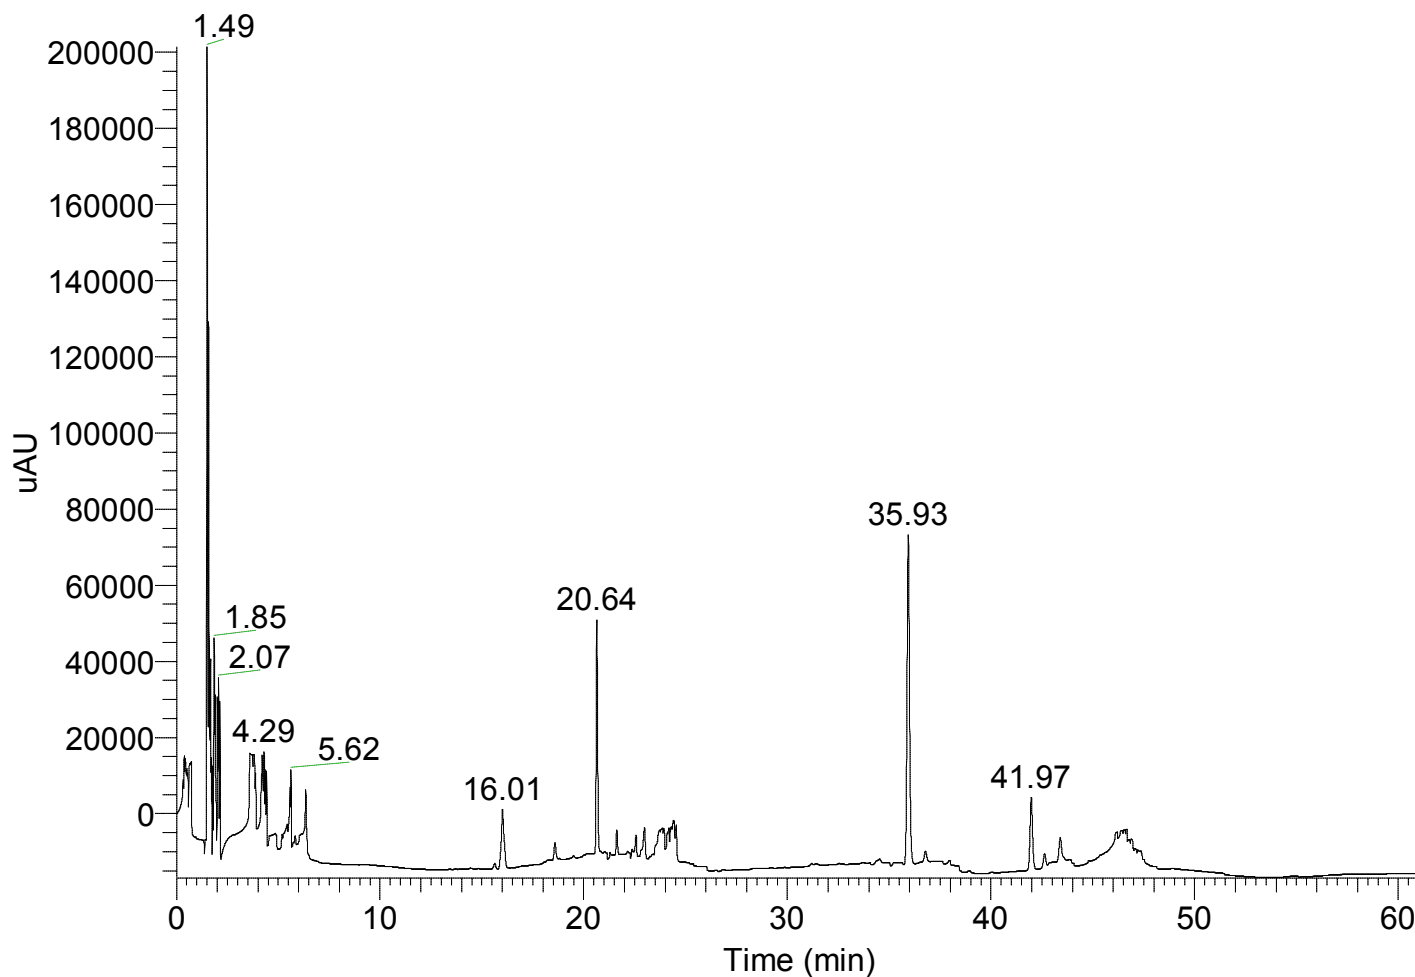

NL:  
2.01E5  
Total Scan  
PDA 45

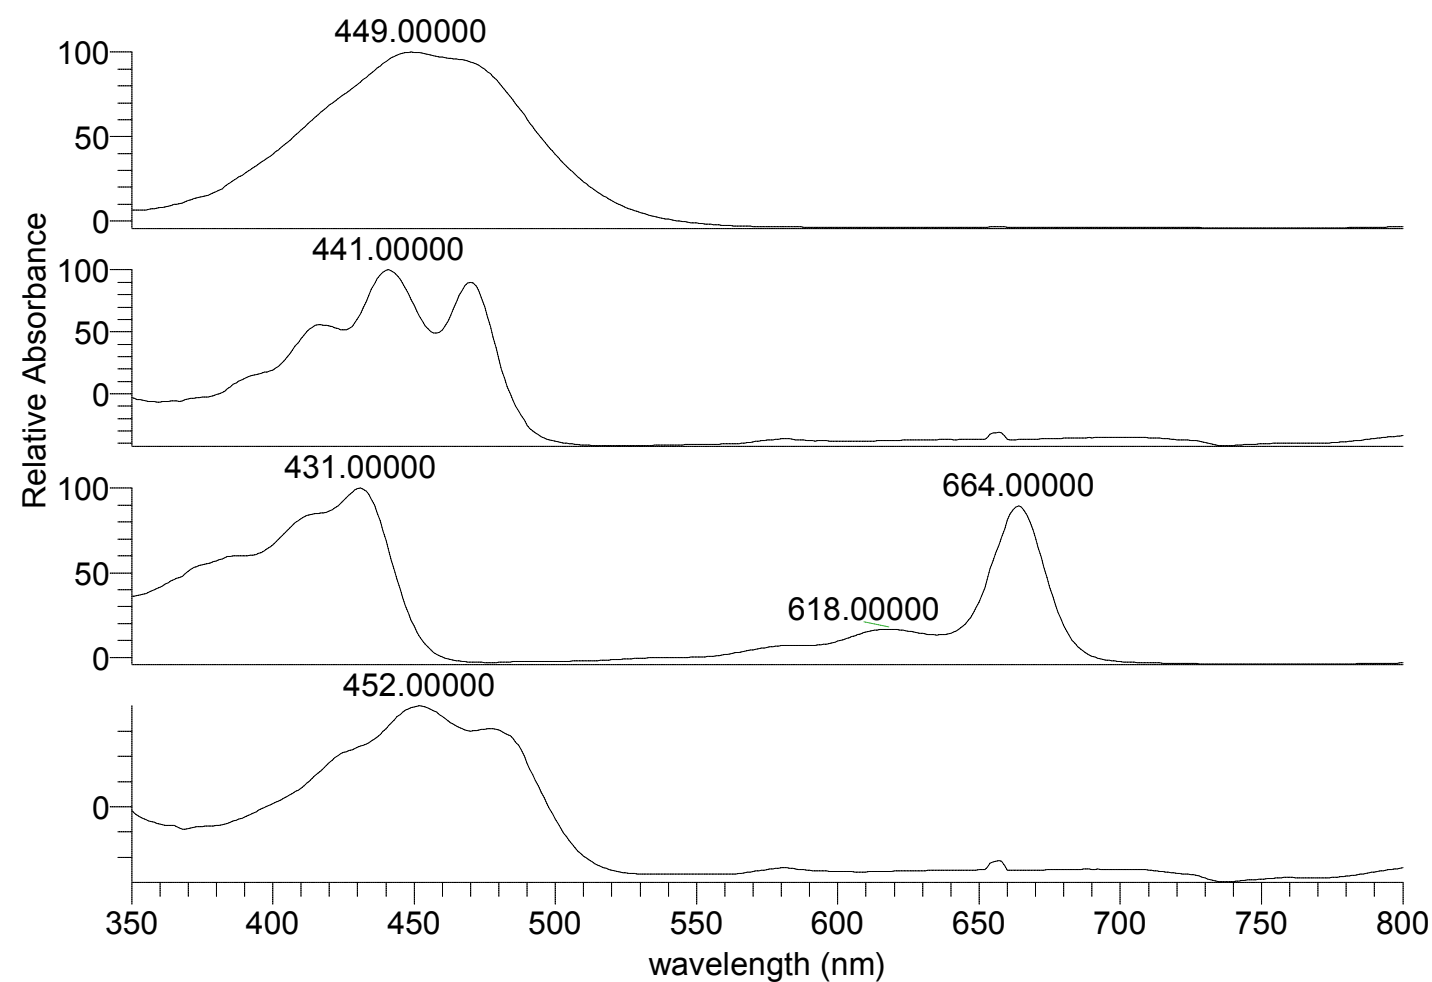

NL:  
2.71E5  
45#6191  
RT: 20.64  
AV: 1

NL:  
2.93E4  
45#6485  
RT: 21.62  
AV: 1

NL:  
3.69E5  
45#10779  
RT: 35.93  
AV: 1

NL:  
2.00E4  
45#13019  
RT: 43.40  
AV: 1

Supplement: Data_Sheet_1.zip [file Muestra45_HPLC-UV.pdf › Carotenoids/Muestra45_HPLC-UV.pdf]

RT: 0.00 - 61.20

NL:  
2.10E5  
Total Scan  
PDA 46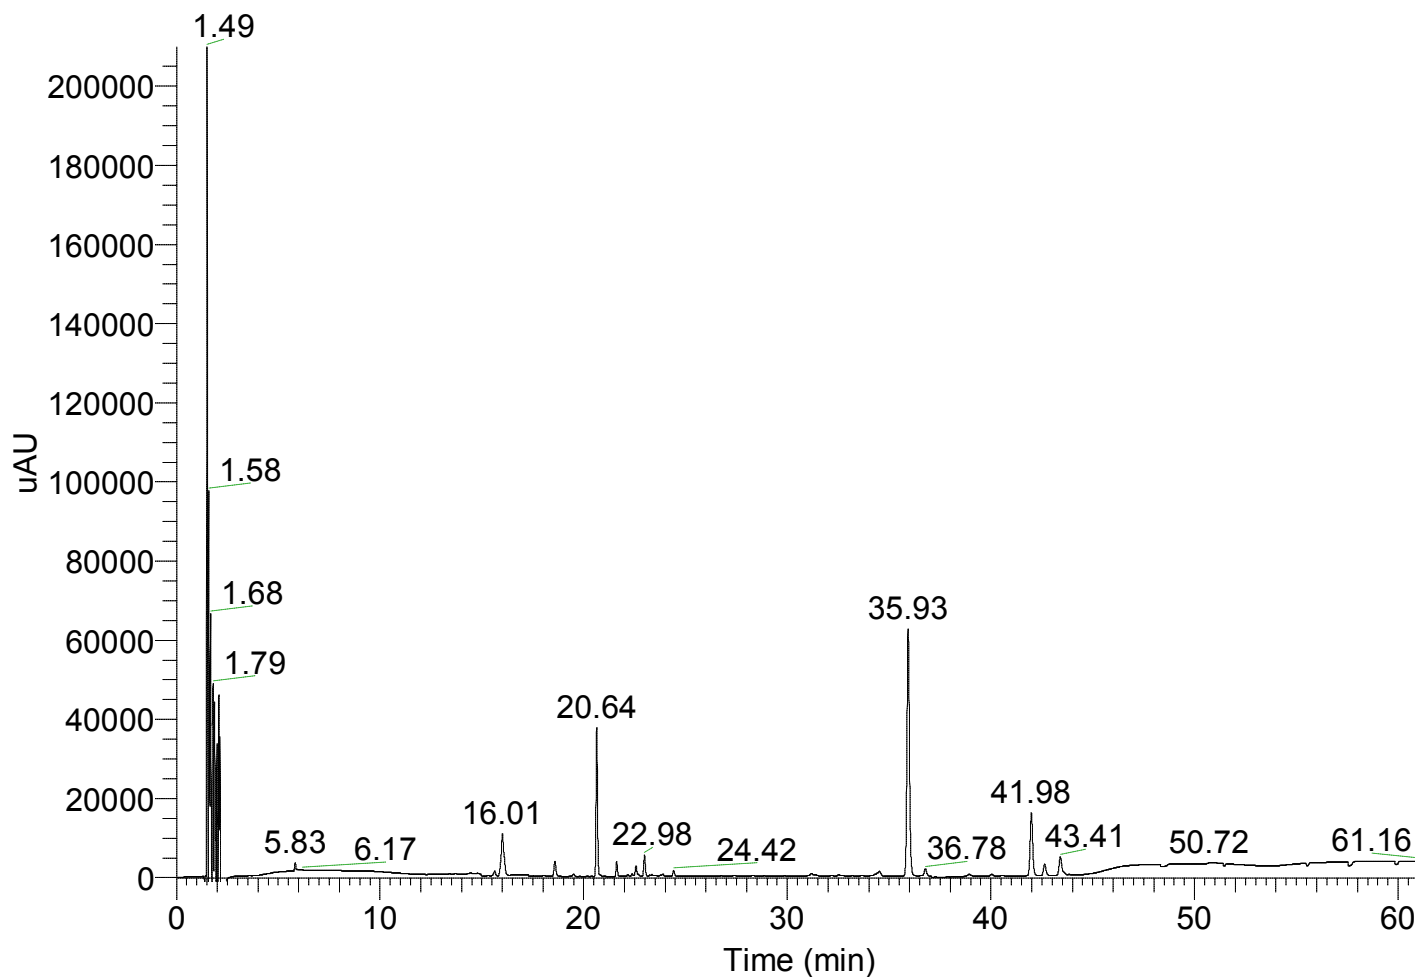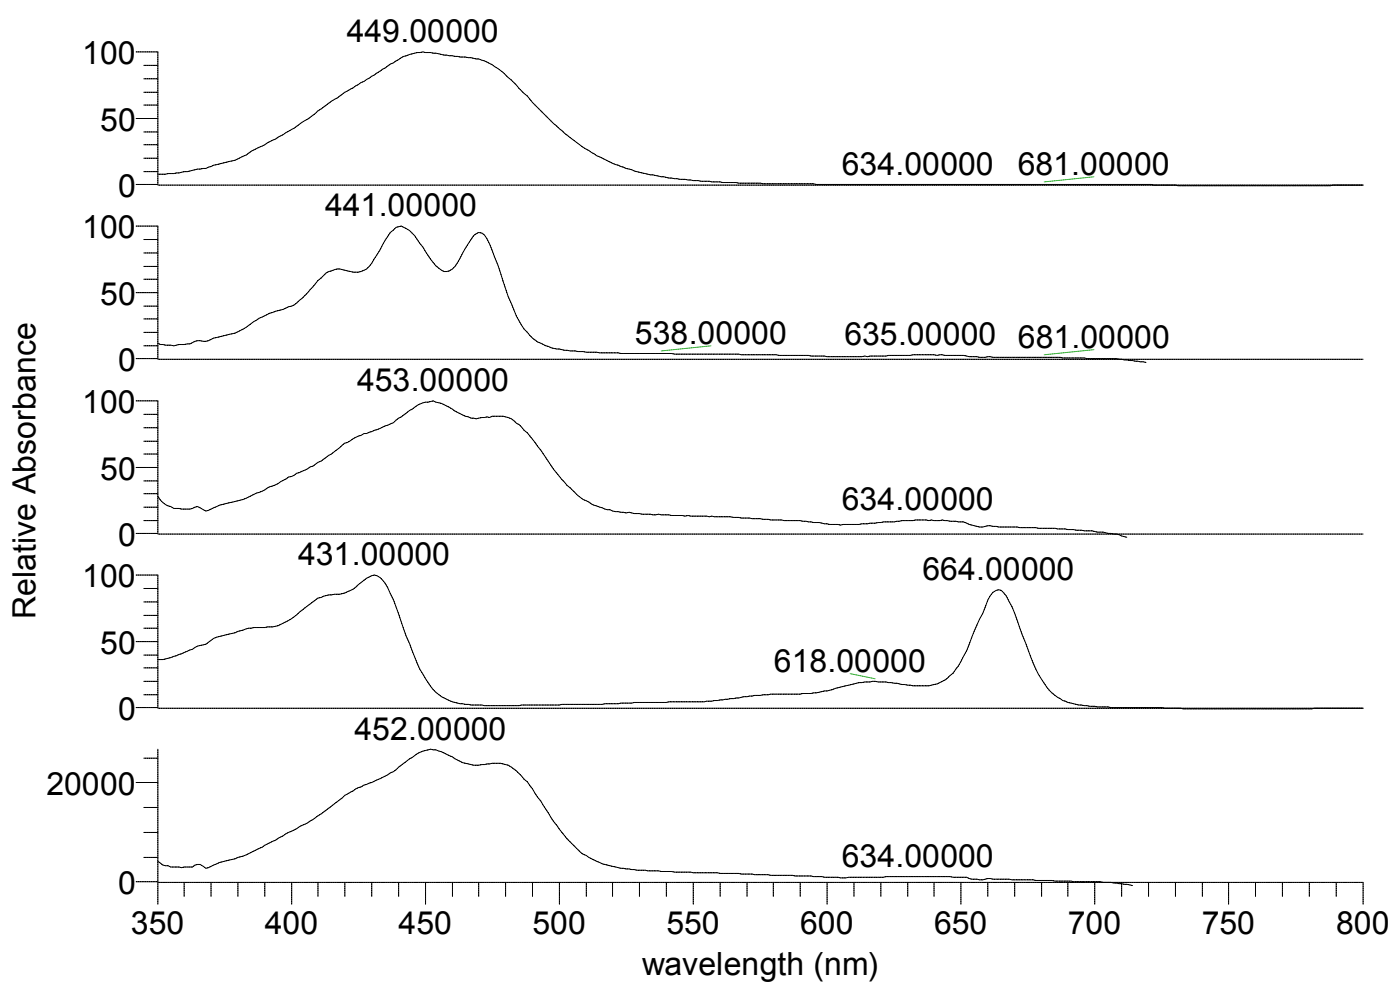NL:  
1.77E5  
46#6192 RT:  
20.64 AV: 1NL:  
2.54E4  
46#6485 RT:  
21.62 AV: 1NL:  
8.97E3  
46#7326 RT:  
24.42 AV: 1NL:  
2.77E5  
46#10778  
RT: 35.93  
AV: 1NL:  
2.67E4  
46#13023  
RT: 43.41  
AV: 1

Supplement: Data_Sheet_1.zip [file Muestra46_HPLC-UV.pdf › Carotenoids/Muestra46_HPLC-UV.pdf]

RT: 0.00 - 61.20

NL:  
2.09E5  
Total Scan  
PDA 47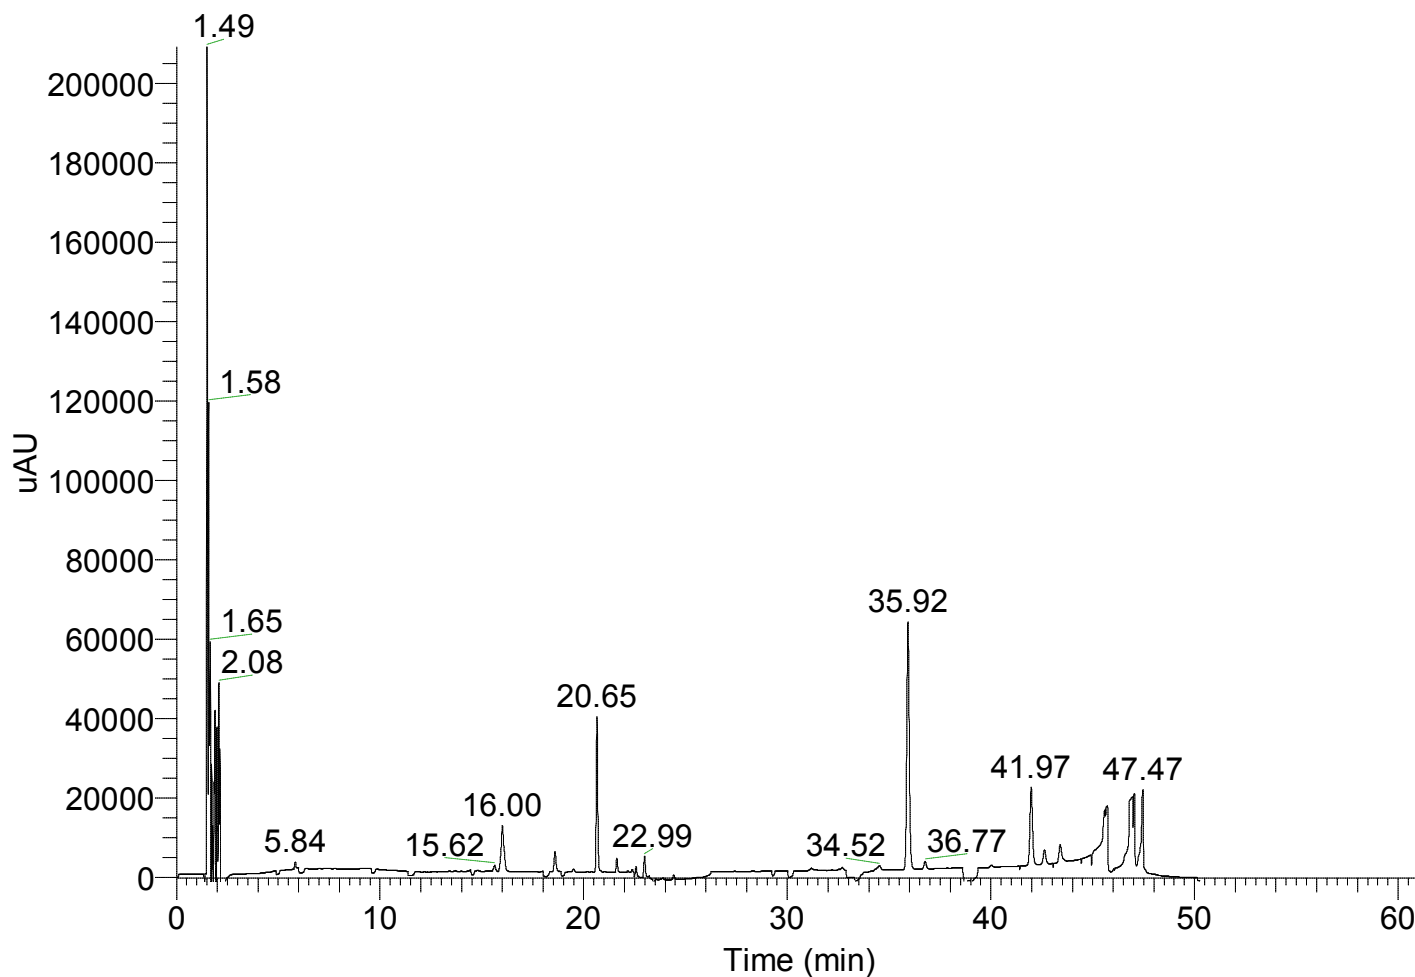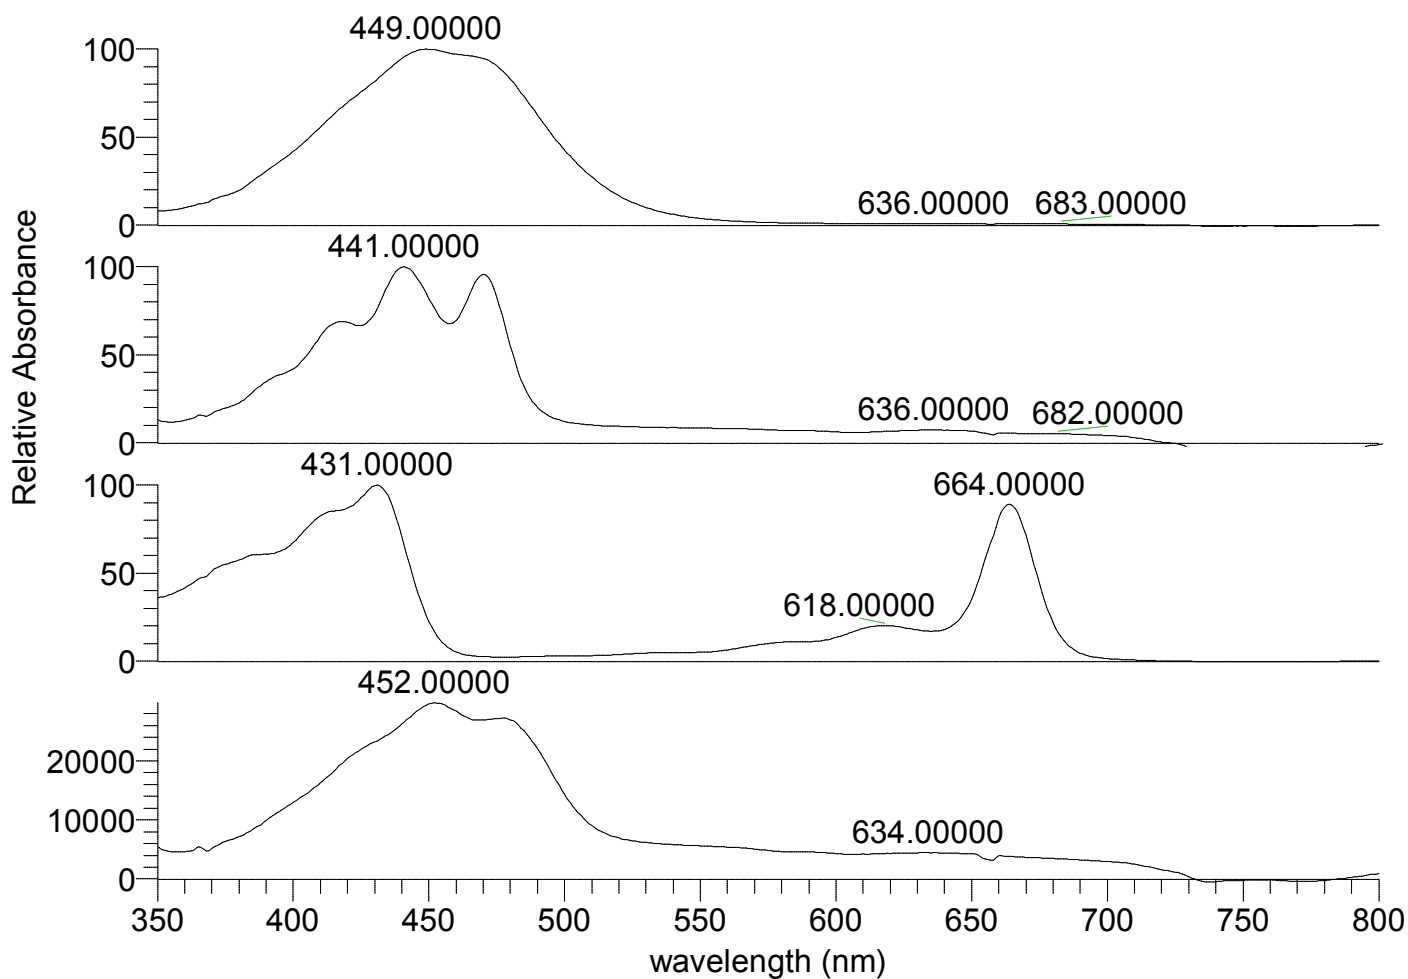

Supplement: Data_Sheet_1.zip [file Muestra47_HPLC-UV.pdf › Carotenoids/Muestra47_HPLC-UV.pdf]
