# Supplementary figures and images for: Photoprotective responses of three intertidal Antarctic macroalgae to short-term temperature stress (part 2 of 2)
Source: Frontiers journal article supplement (doi:10.3389/fmars.2023.1223853), 2023-10-25

RT: 0.00 - 61.20

NL:  
2.10E5  
Total Scan  
PDA 48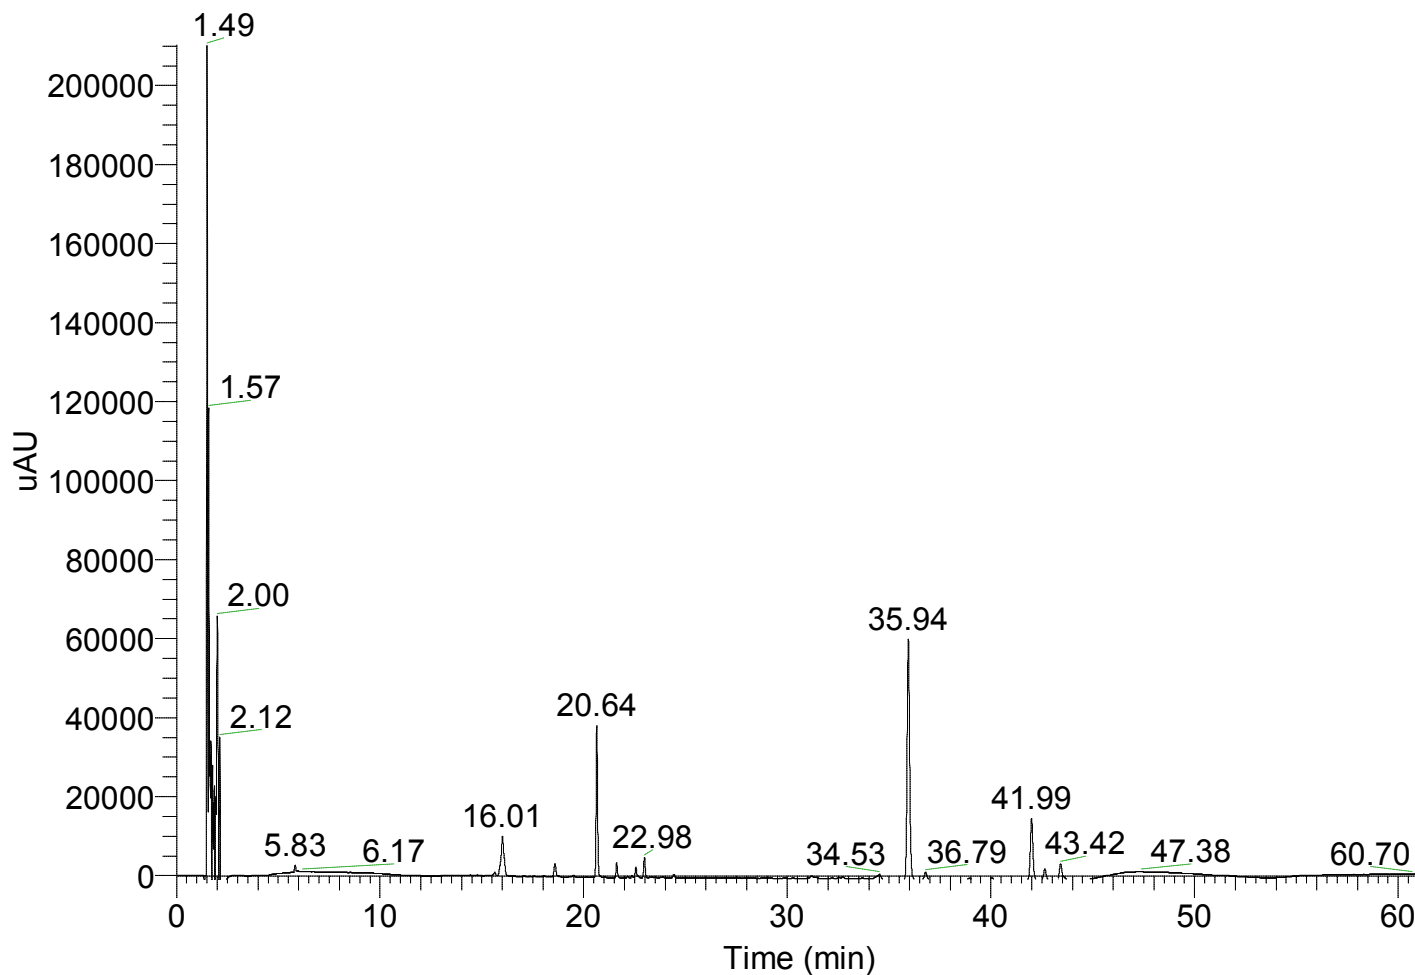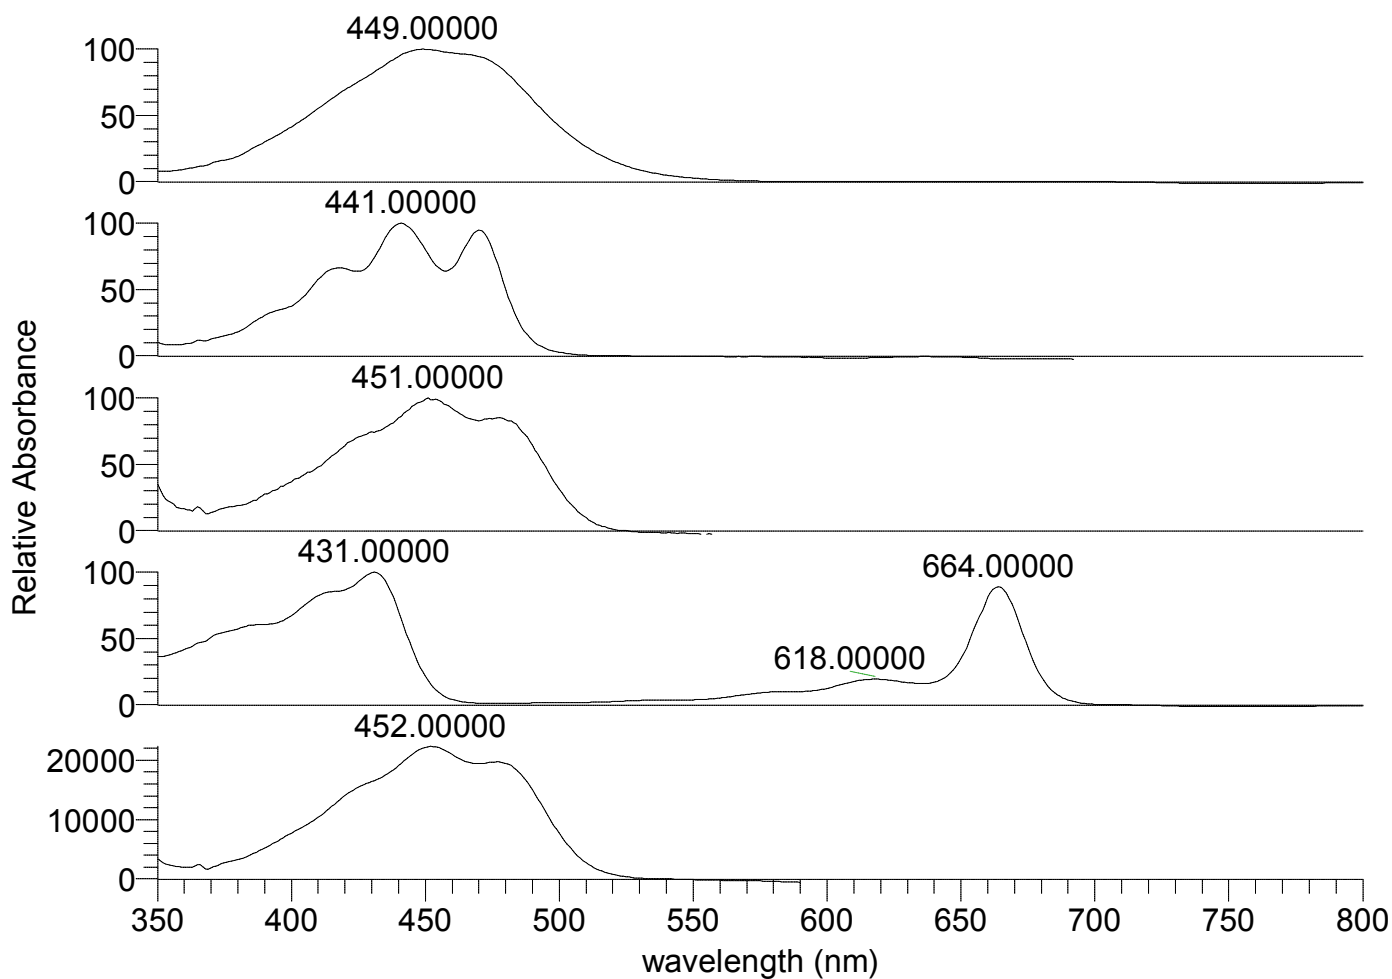NL:  
1.81E5  
48#6192 RT:  
20.64 AV: 1NL:  
2.57E4  
48#6485 RT:  
21.62 AV: 1NL:  
5.39E3  
48#7327 RT:  
24.42 AV: 1NL:  
2.69E5  
48#10781  
RT: 35.94  
AV: 1NL:  
2.23E4  
48#13026  
RT: 43.42  
AV: 1

Supplement: Data_Sheet_1.zip [file Muestra48_HPLC-UV.pdf › Carotenoids/Muestra48_HPLC-UV.pdf]

RT: 0.00 - 61.20

NL:  
2.14E5  
Total Scan  
PDA 49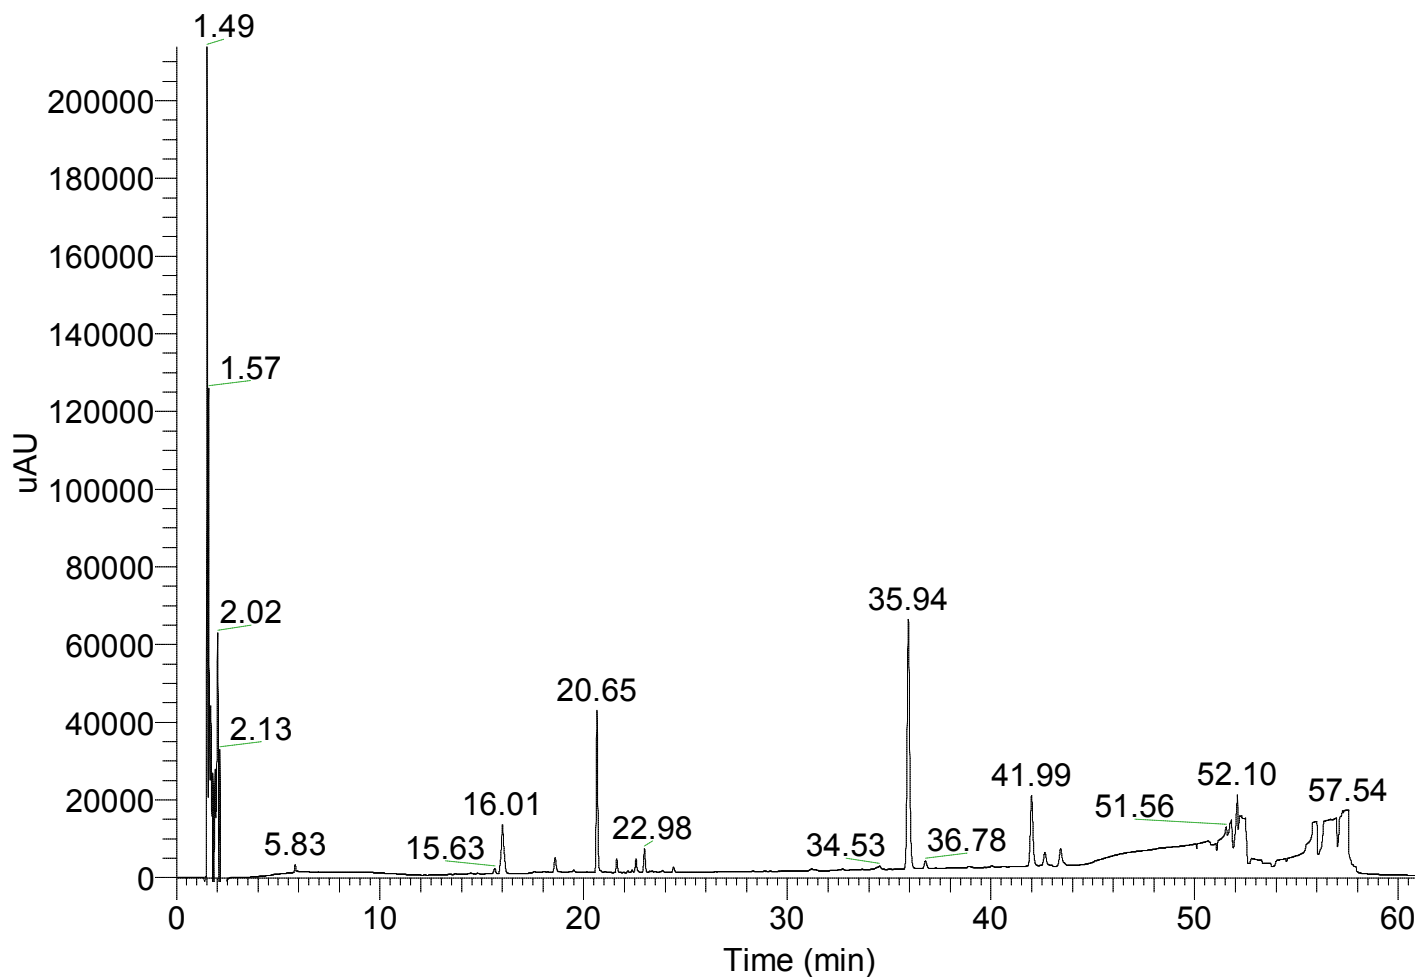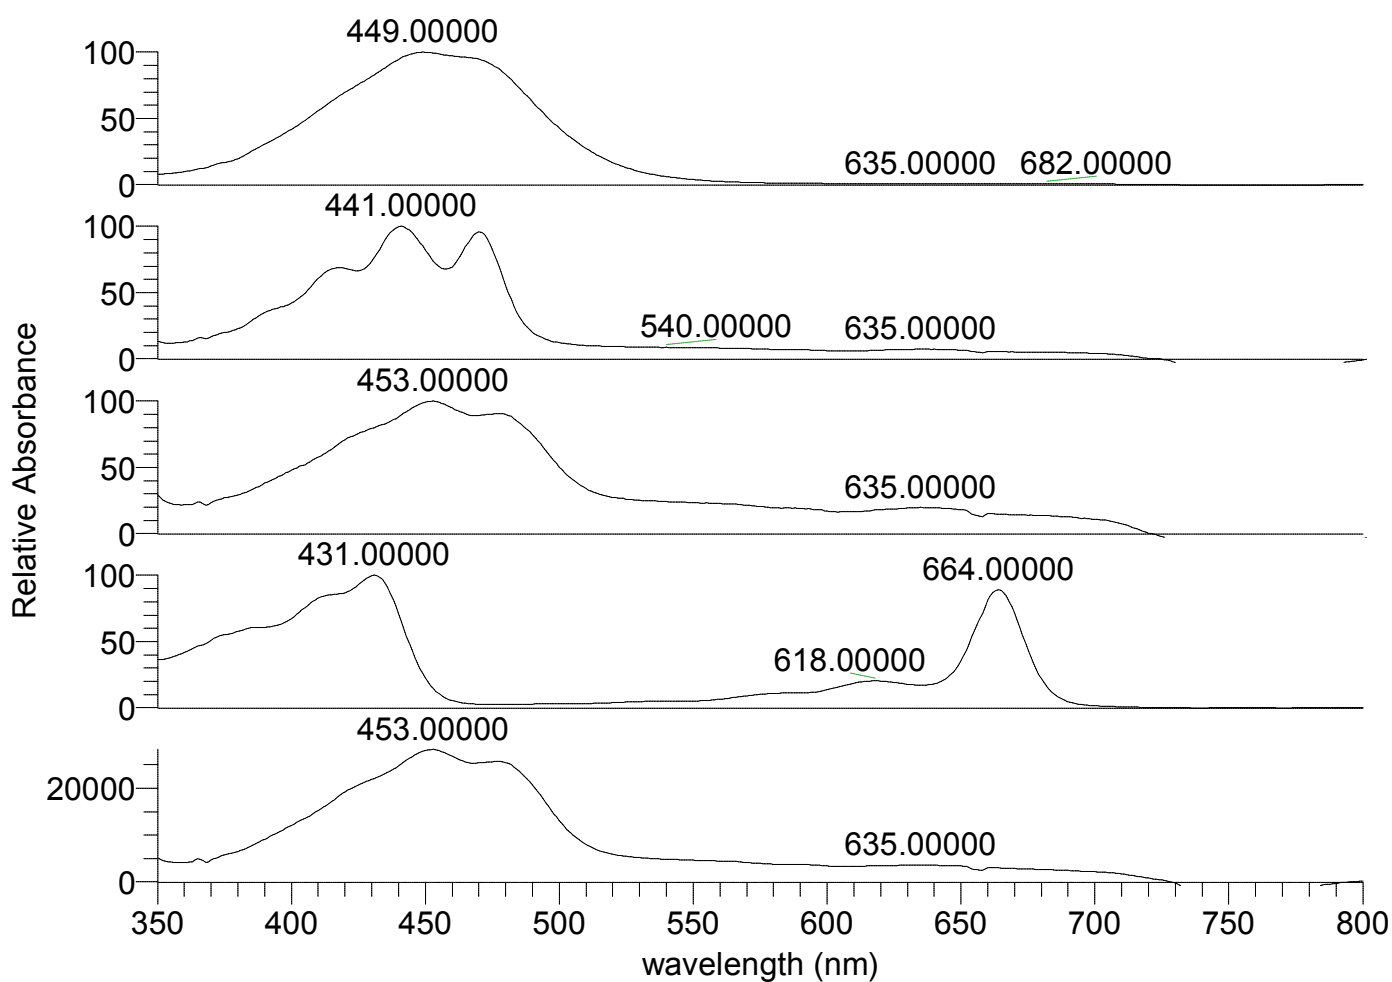NL:  
1.99E5  
49#6194 RT:  
20.65 AV: 1NL:  
2.53E4  
49#6485 RT:  
21.62 AV: 1NL:  
9.98E3  
49#7323 RT:  
24.41 AV: 1NL:  
2.88E5  
49#10781  
RT: 35.94  
AV: 1NL:  
2.83E4  
49#13025  
RT: 43.42  
AV: 1

Supplement: Data_Sheet_1.zip [file Muestra49_HPLC-UV.pdf › Carotenoids/Muestra49_HPLC-UV.pdf]

RT: 17.99 - 47.10

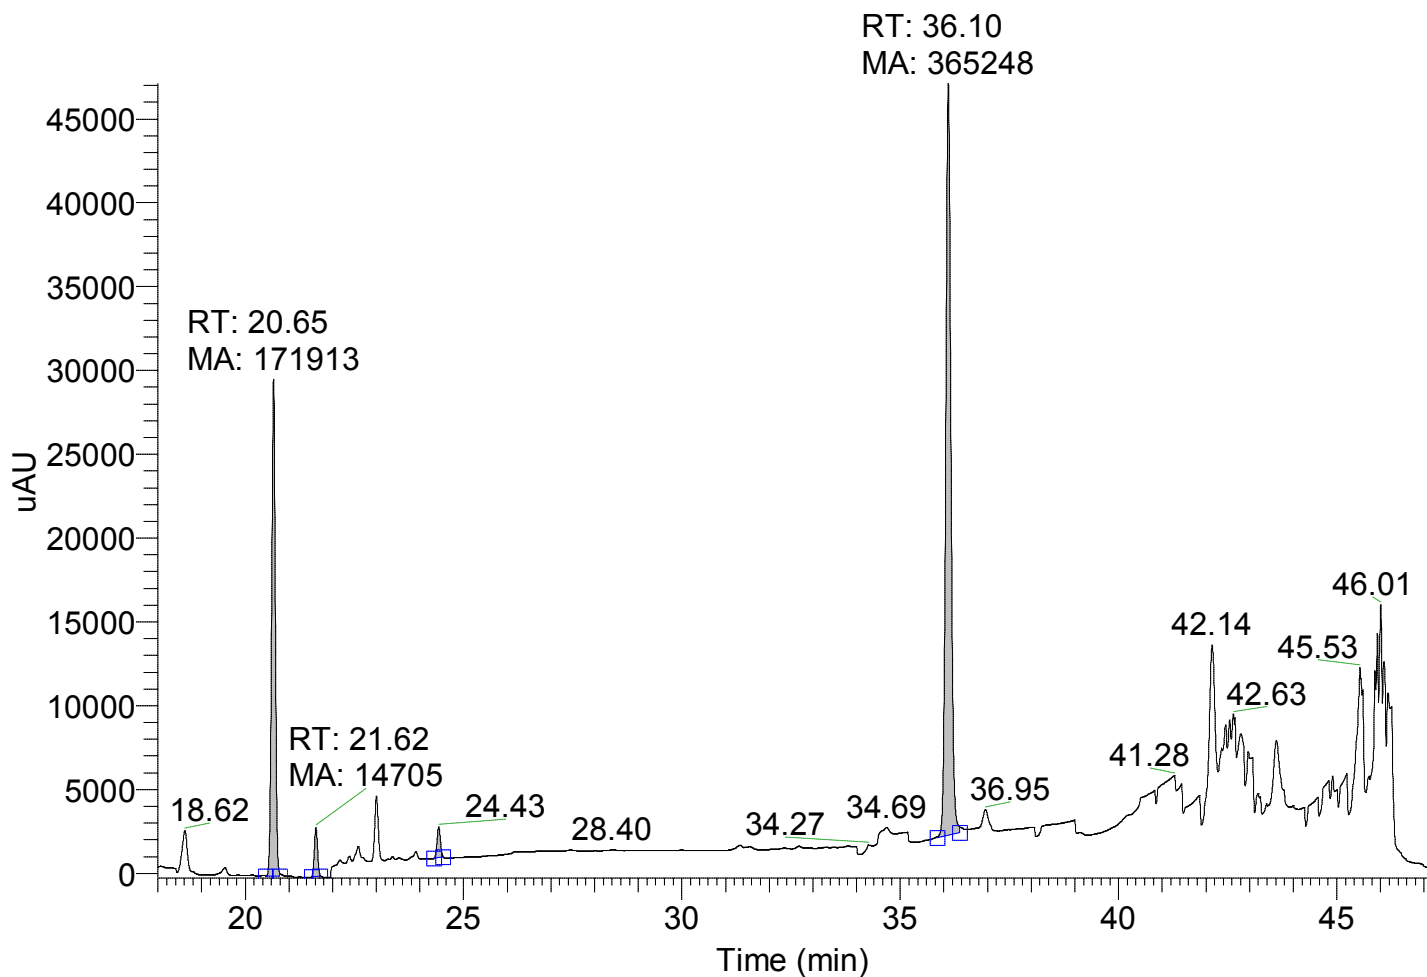

NL:  
4.71E4  
Total Scan  
PDA  
Muestra4

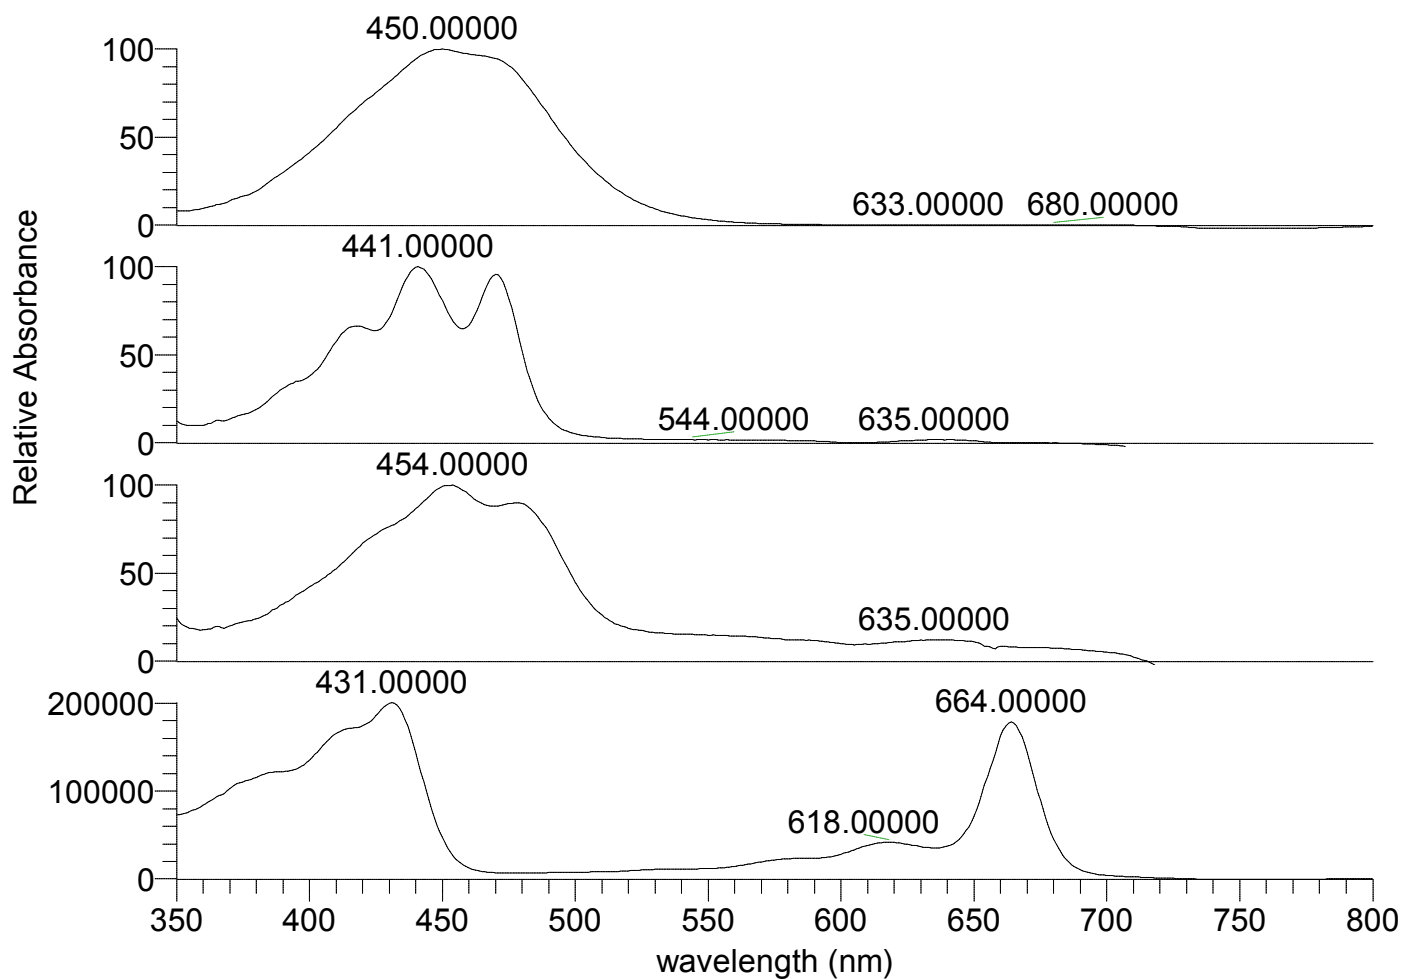

Supplement: Data_Sheet_1.zip [file Muestra4_HPLC-UV.pdf › Carotenoids/Muestra4_HPLC-UV.pdf]

RT: 0.00 - 61.20

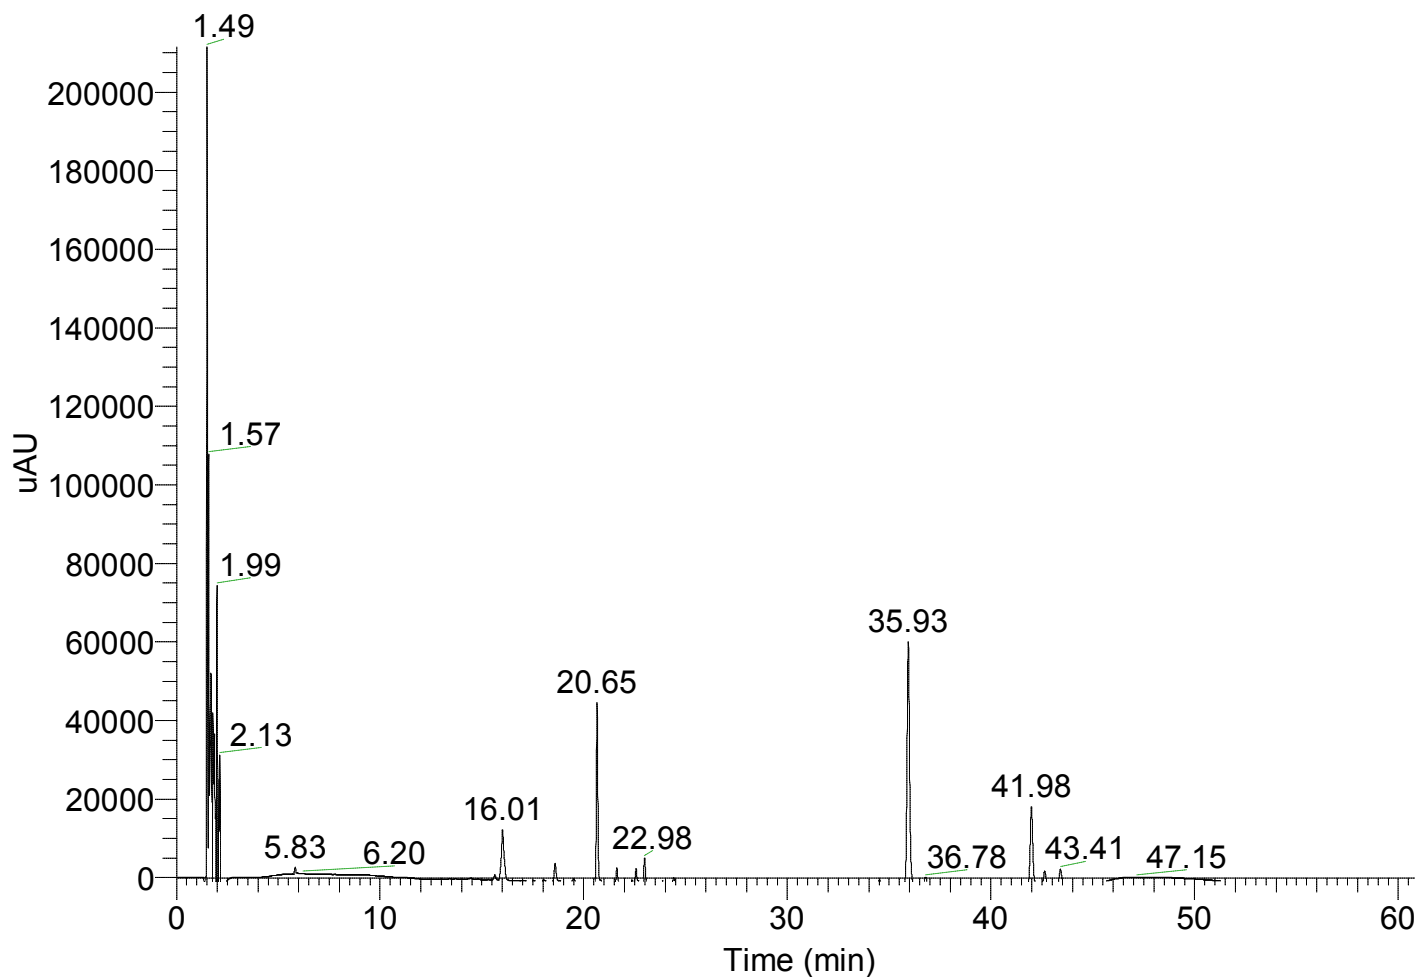

NL:  
2.11E5  
Total Scan  
PDA 50

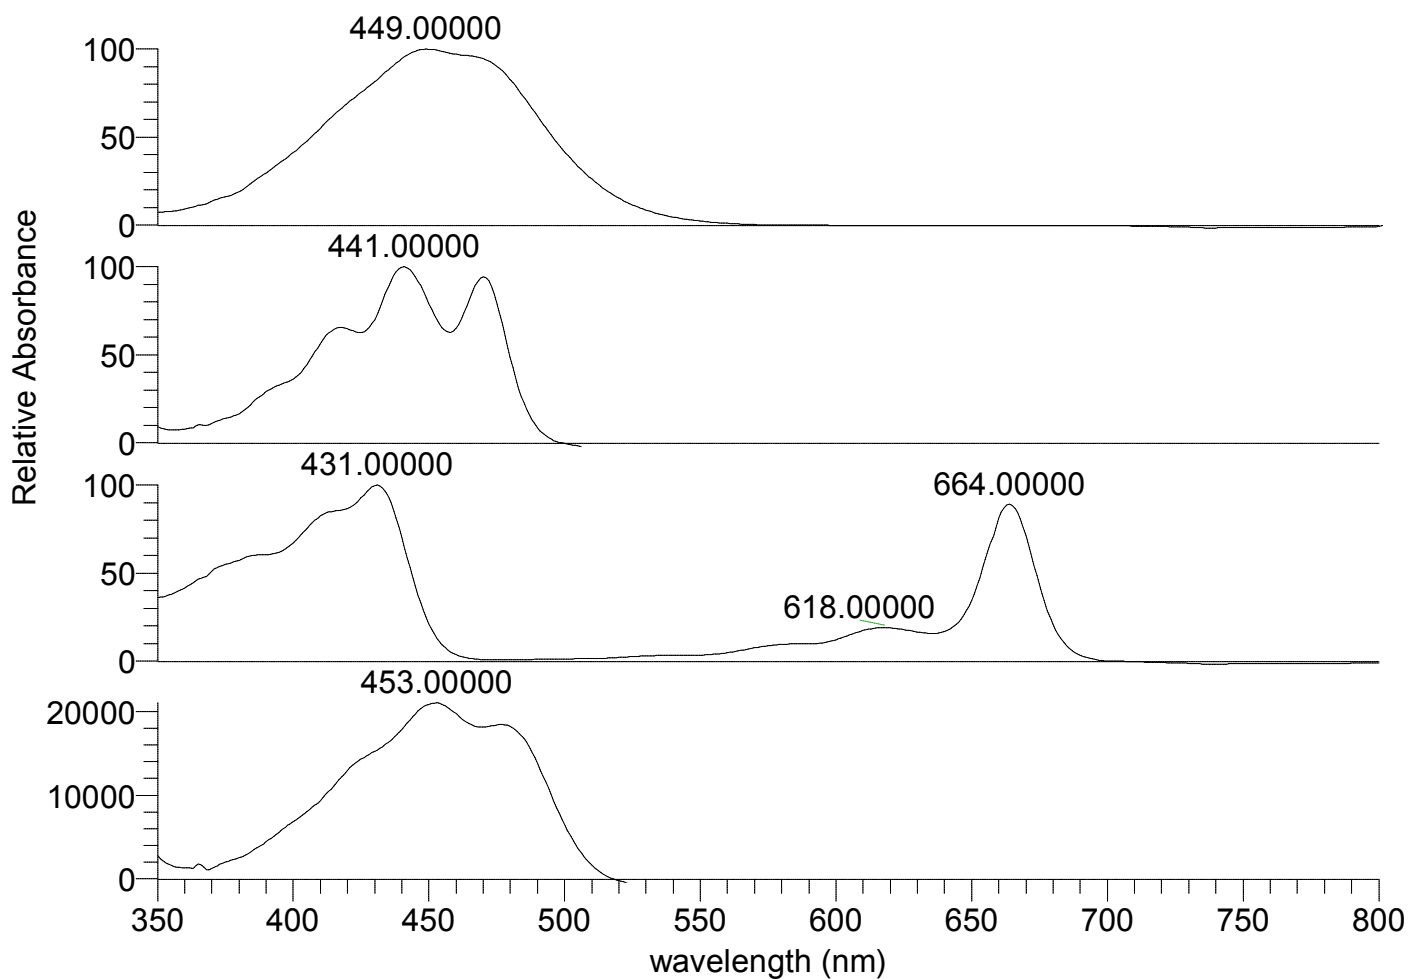

NL:  
2.14E5  
50#6194  
RT: 20.65  
AV: 1

NL:  
2.39E4  
50#6487  
RT: 21.62  
AV: 1

NL:  
2.72E5  
50#10779  
RT: 35.93  
AV: 1

NL:  
2.10E4  
50#13023  
RT: 43.41  
AV: 1

Supplement: Data_Sheet_1.zip [file Muestra50_HPLC-UV.pdf › Carotenoids/Muestra50_HPLC-UV.pdf]

RT: 0.00 - 61.20

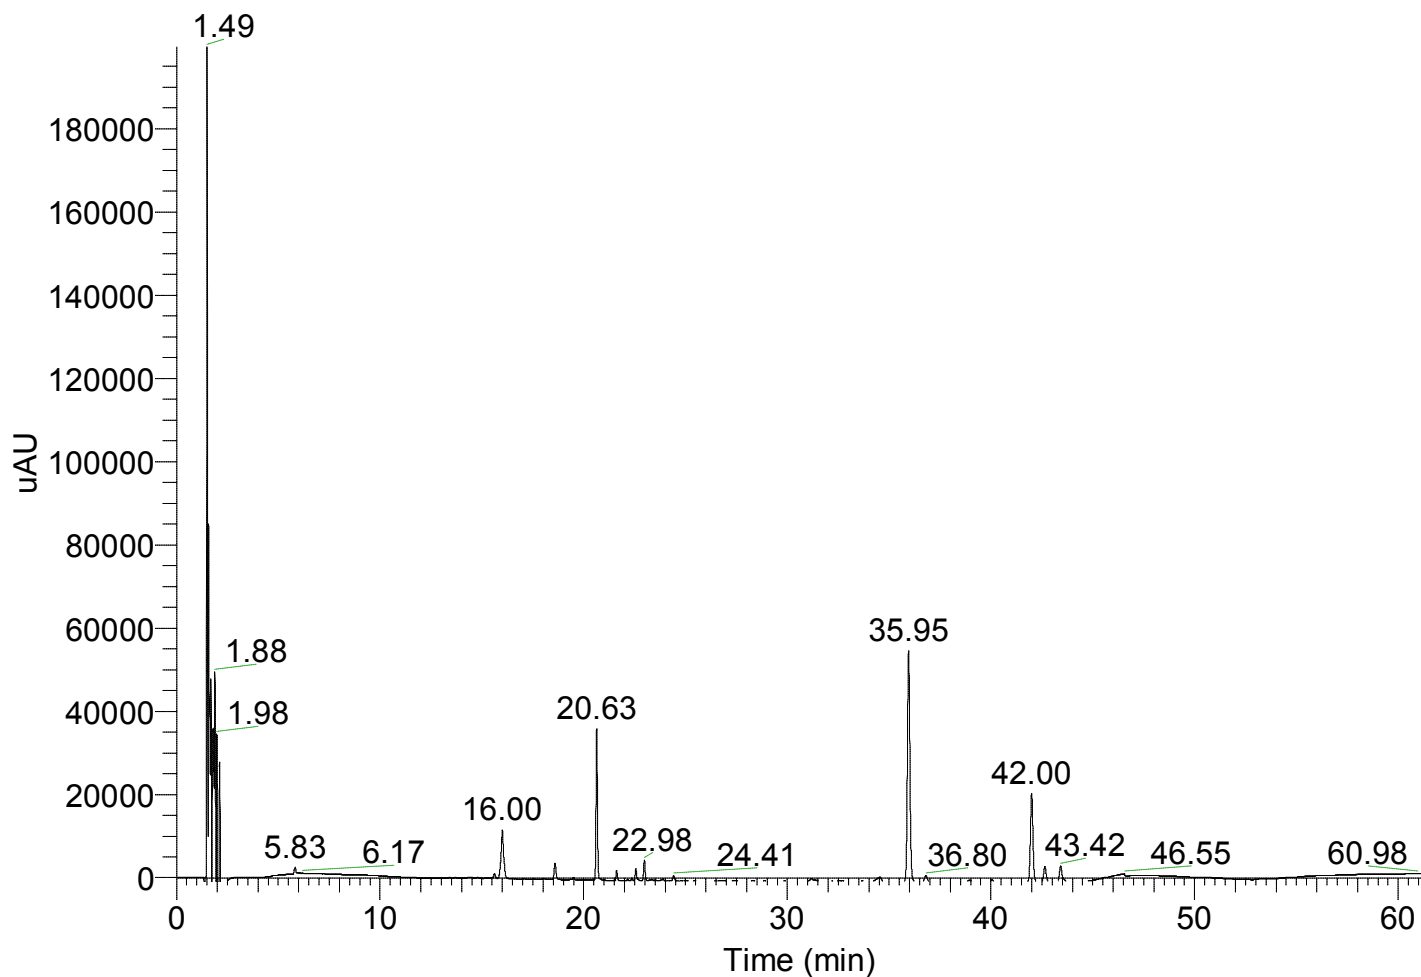

NL:  
2.00E5  
Total Scan  
PDA 51

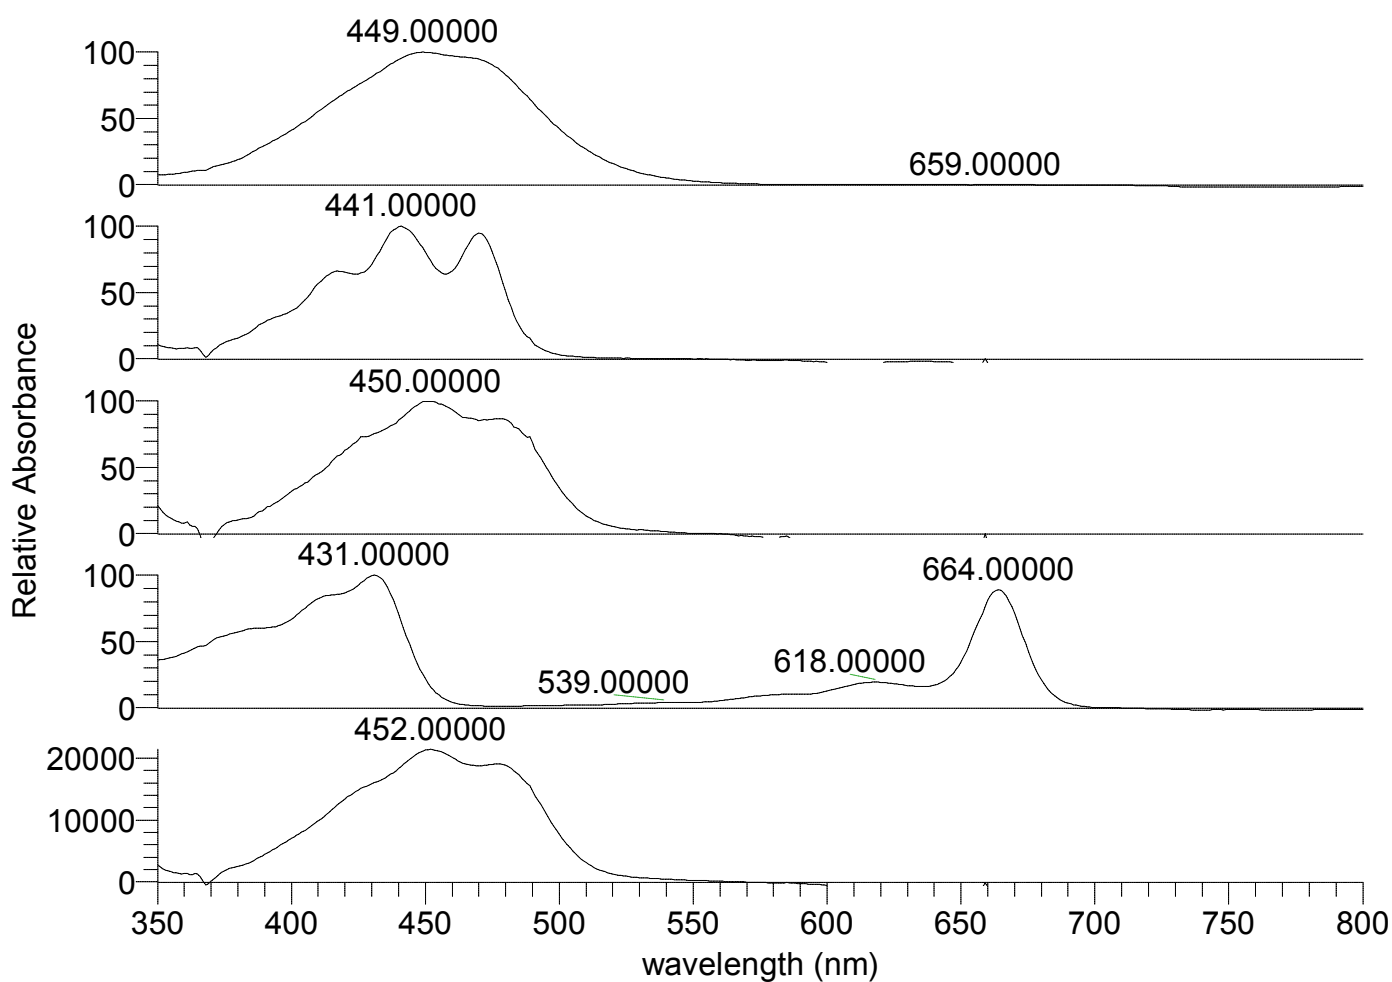

NL:  
1.66E5  
51#6188 RT:  
20.63 AV: 1

NL:  
1.70E4  
51#6484 RT:  
21.61 AV: 1

NL:  
7.57E3  
51#7322 RT:  
24.41 AV: 1

NL:  
2.46E5  
51#10785  
RT: 35.95  
AV: 1

NL:  
2.14E4  
51#13025  
RT: 43.42  
AV: 1

Supplement: Data_Sheet_1.zip [file Muestra51_HPLC-UV.pdf › Carotenoids/Muestra51_HPLC-UV.pdf]

RT: 0.00 - 61.20

NL:  
2.08E5  
Total Scan  
PDA 52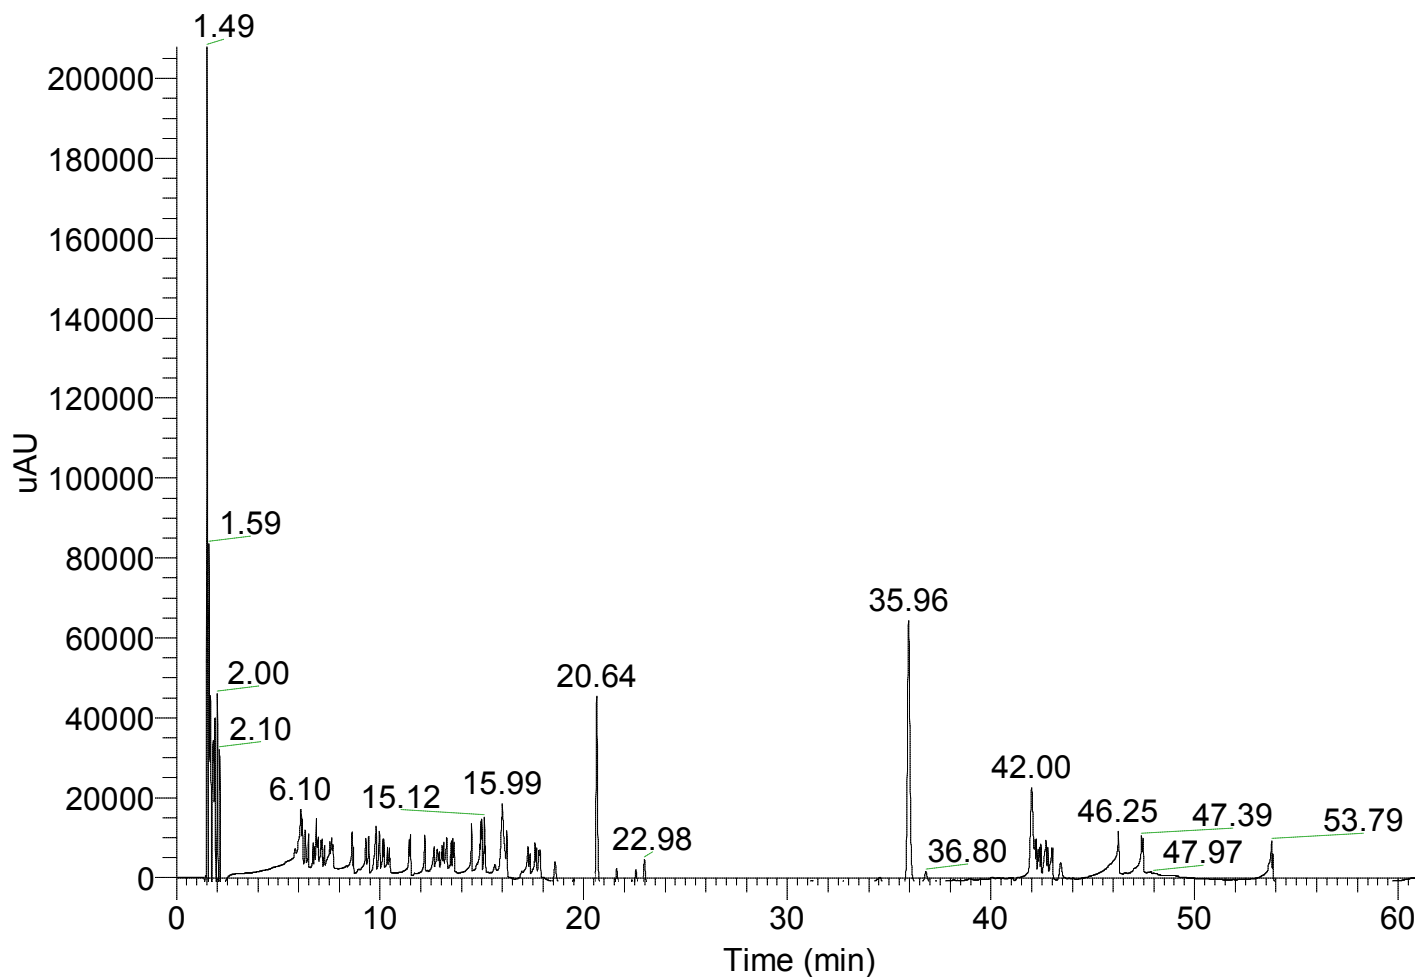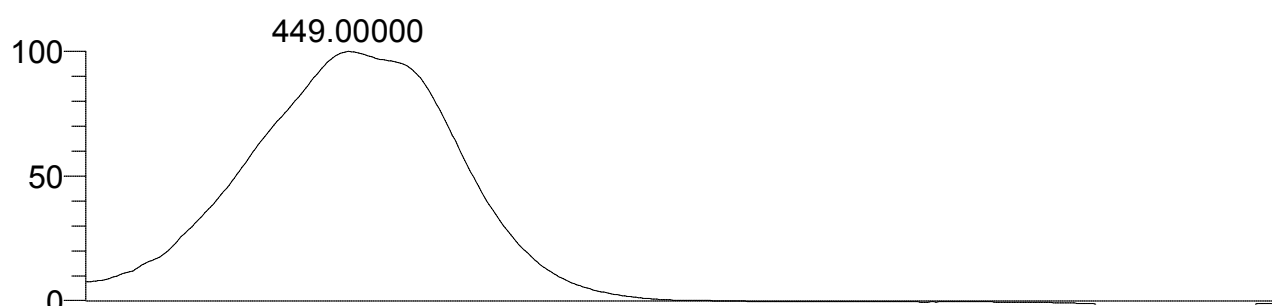NL:  
2.20E5  
52#6191  
RT: 20.64  
AV: 1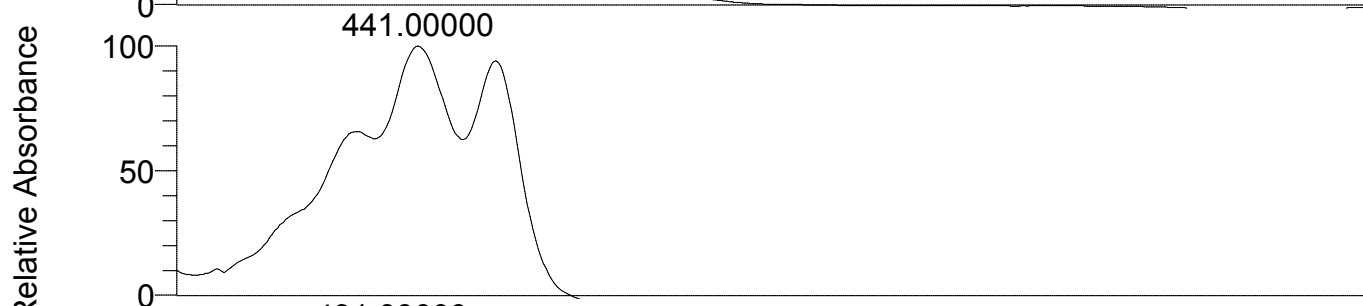NL:  
2.44E4  
52#6485  
RT: 21.62  
AV: 1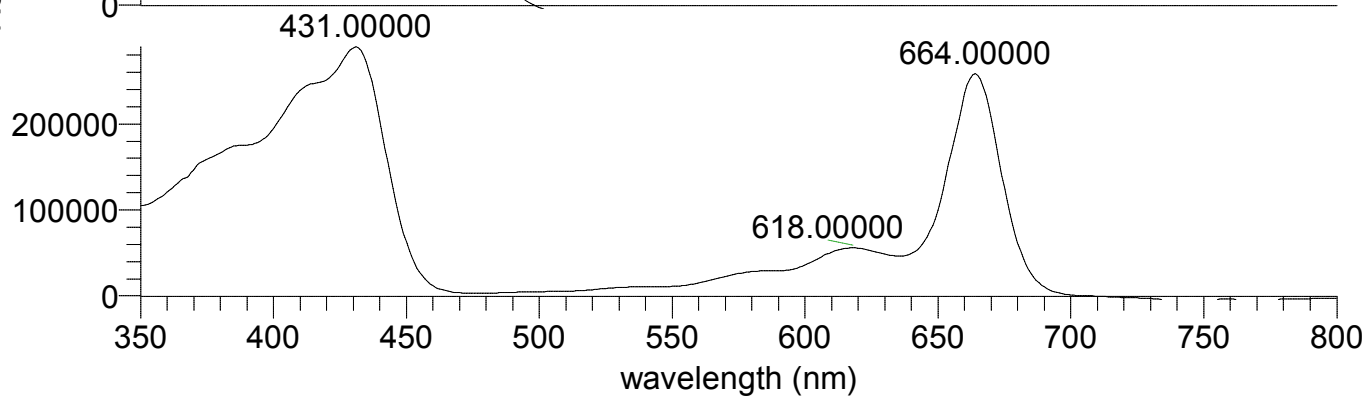NL:  
2.89E5  
52#10787  
RT: 35.96  
AV: 1

Supplement: Data_Sheet_1.zip [file Muestra52_HPLC-UV.pdf › Carotenoids/Muestra52_HPLC-UV.pdf]

RT: 0.00 - 61.20

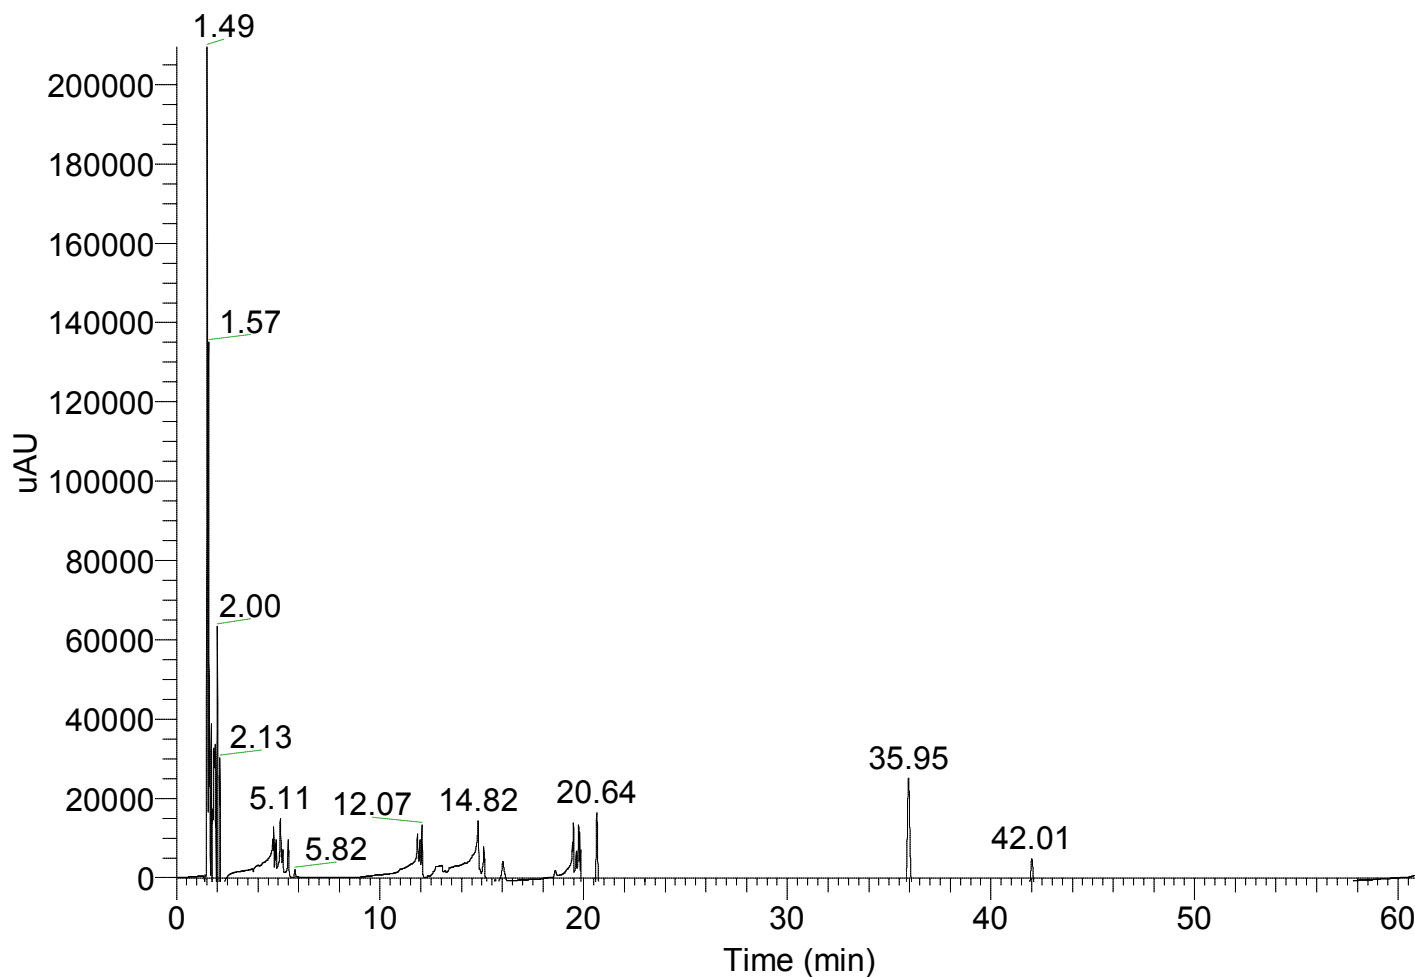

NL:  
2.09E5  
Total Scan  
PDA 53

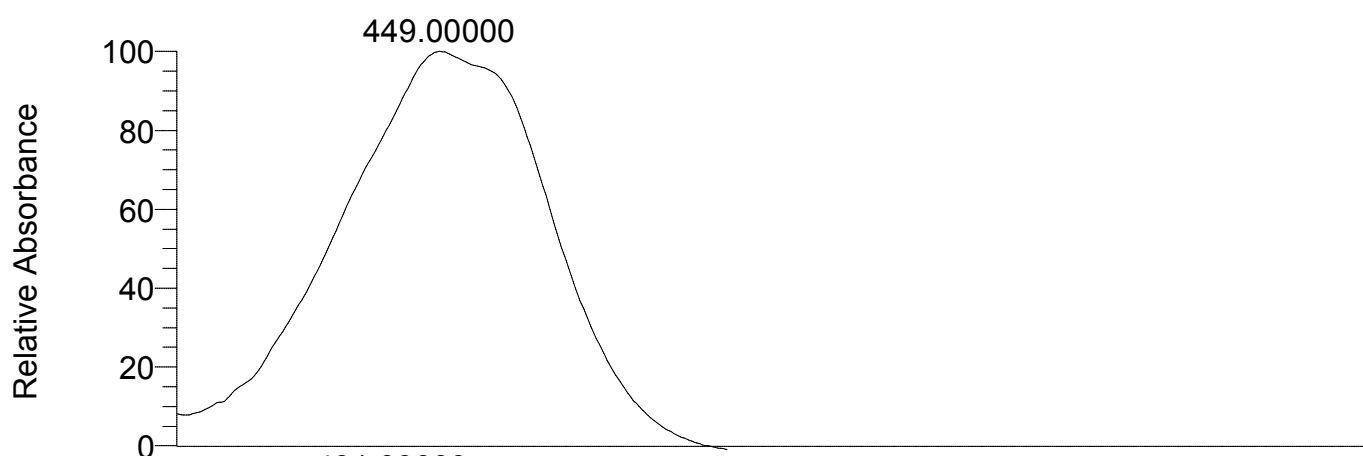

NL:  
8.75E4  
53#6193  
RT: 20.64  
AV: 1

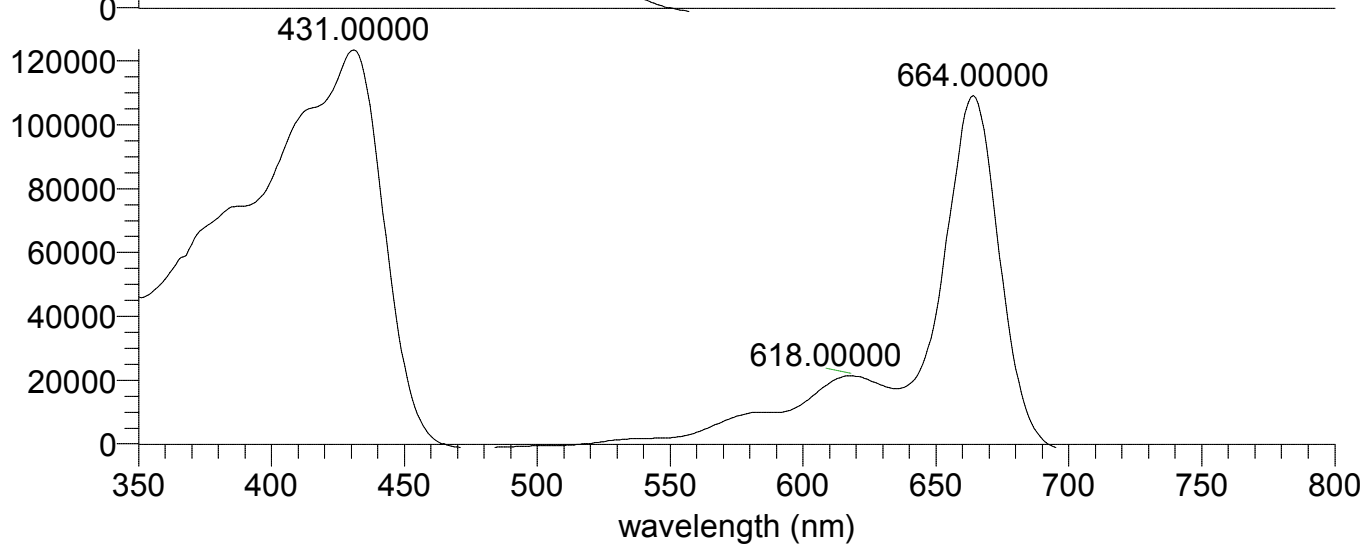

NL:  
1.24E5  
53#10785  
RT: 35.95  
AV: 1

Supplement: Data_Sheet_1.zip [file Muestra53_HPLC-UV.pdf › Carotenoids/Muestra53_HPLC-UV.pdf]

RT: 0.00 - 61.20

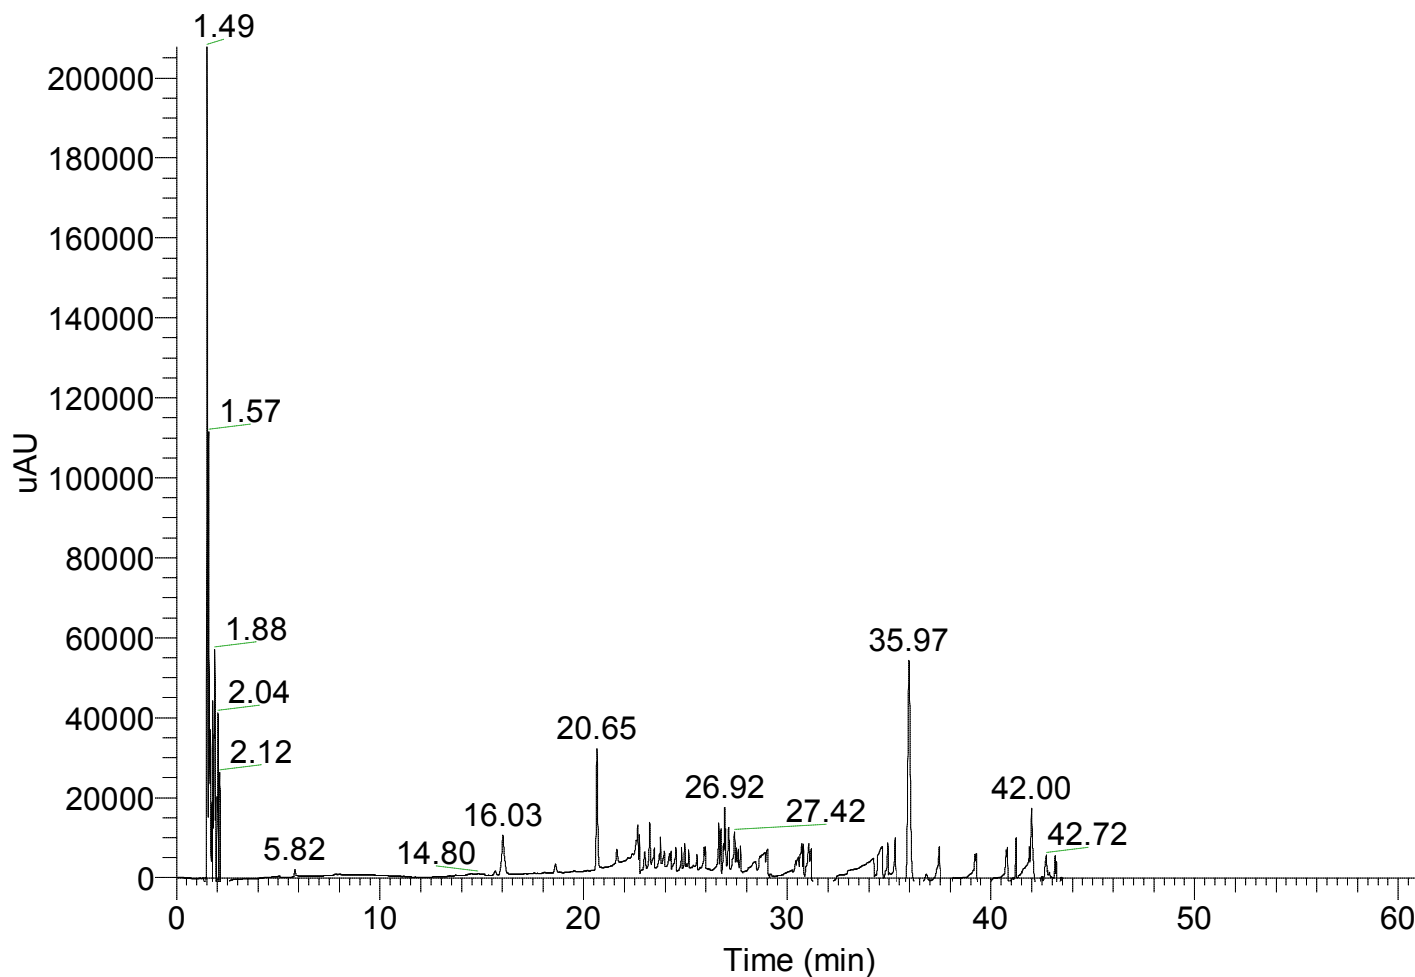

NL:  
2.08E5  
Total Scan  
PDA 54

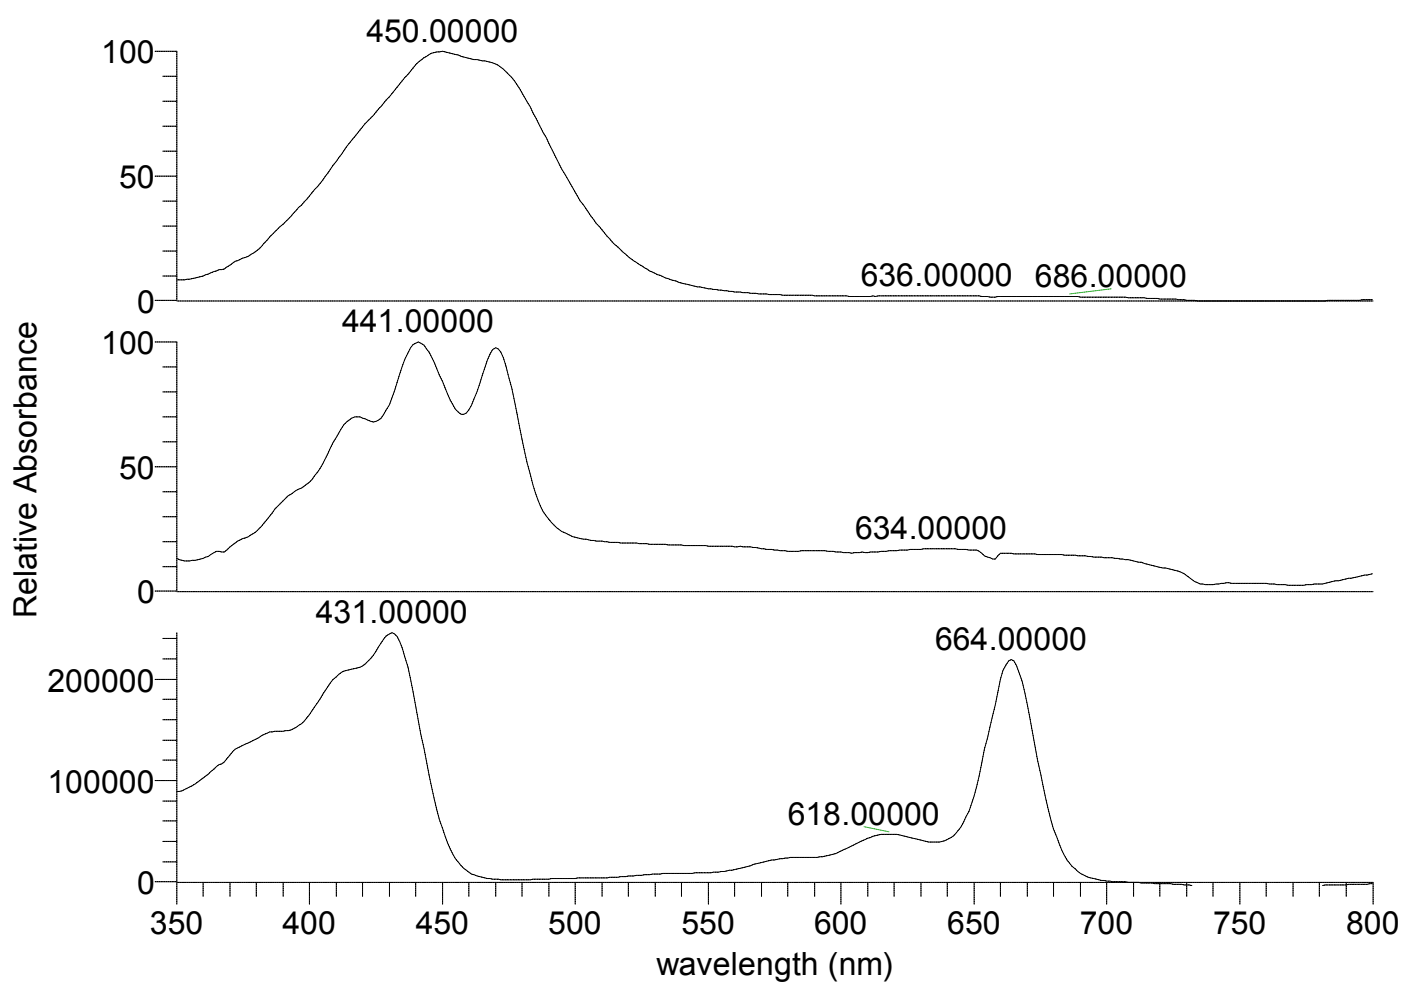

NL:  
1.44E5  
54#6195  
RT: 20.65  
AV: 1

NL:  
2.70E4  
54#6488  
RT: 21.63  
AV: 1

NL:  
2.45E5  
54#10791  
RT: 35.97  
AV: 1

Supplement: Data_Sheet_1.zip [file Muestra54_HPLC-UV.pdf › Carotenoids/Muestra54_HPLC-UV.pdf]

RT: 0.00 - 61.20

NL:  
2.06E5  
Total Scan  
PDA 55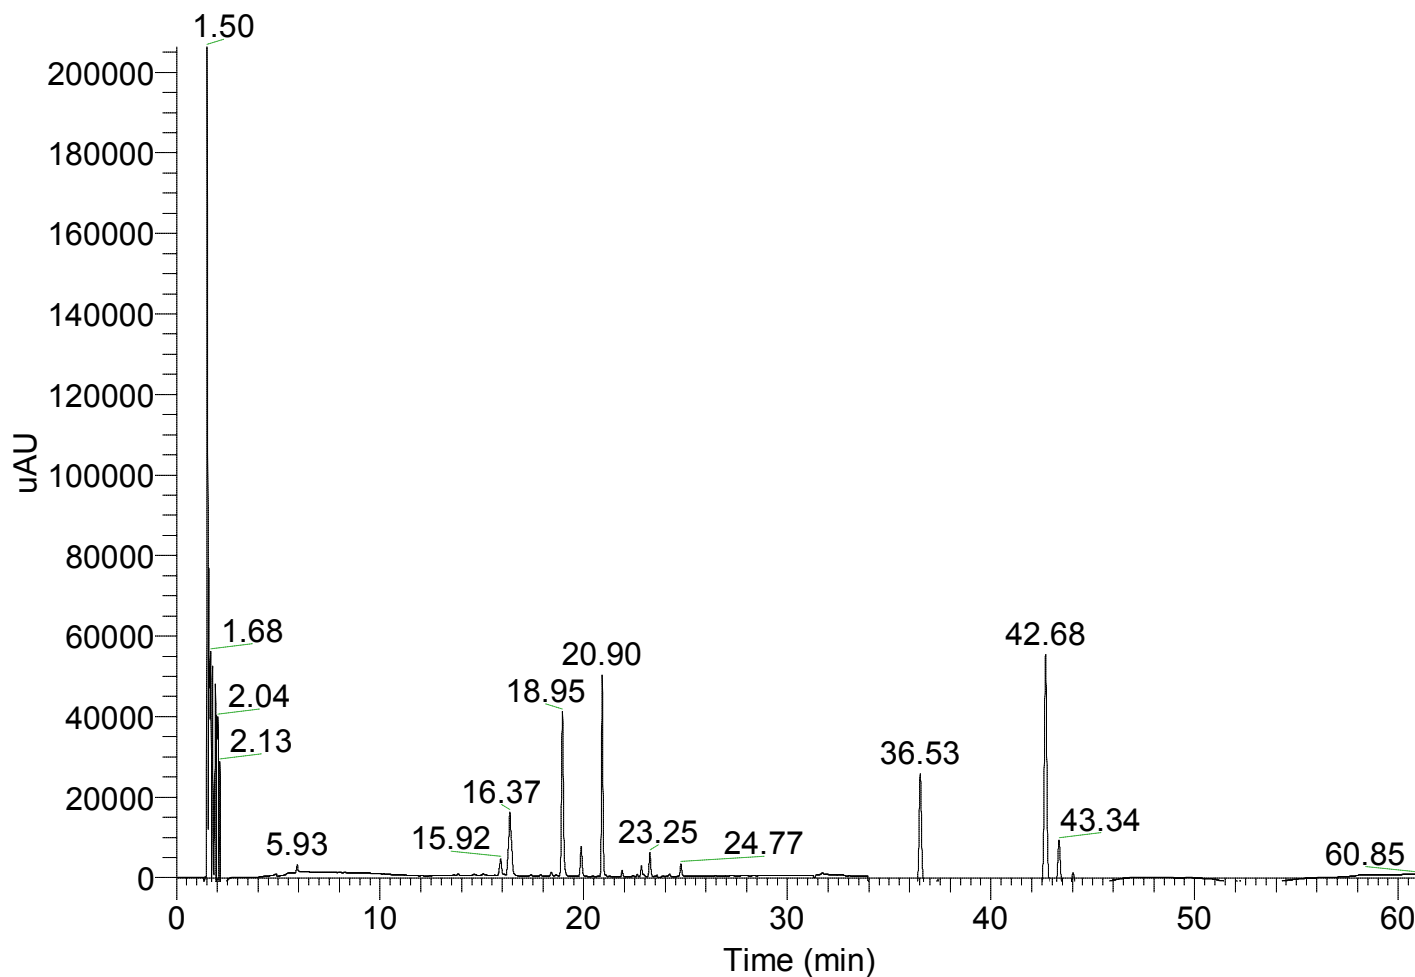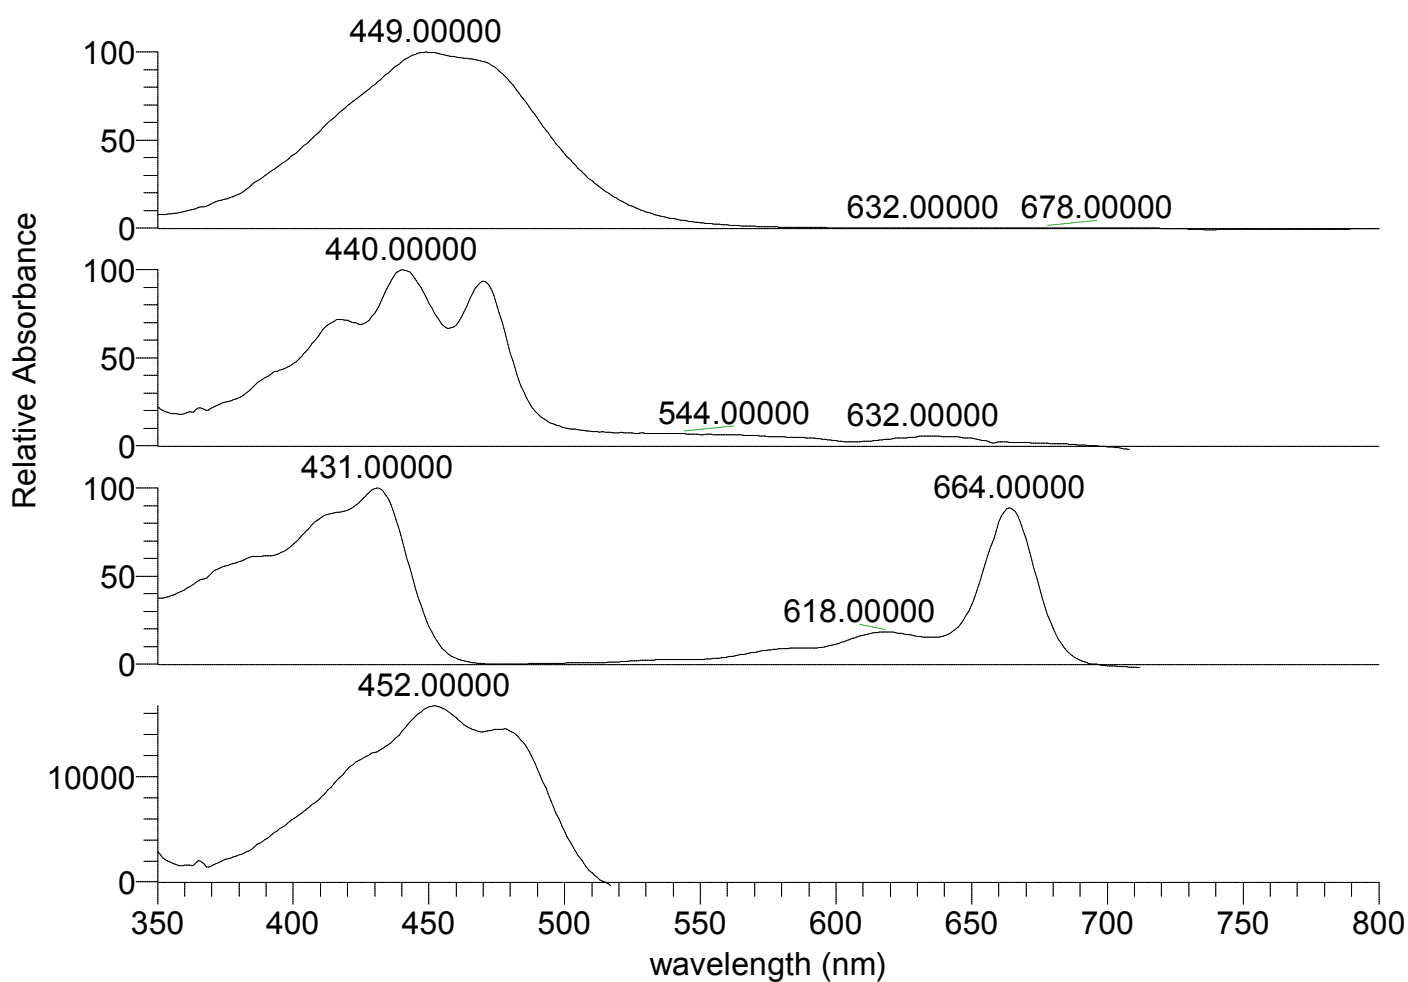

Supplement: Data_Sheet_1.zip [file Muestra55_HPLC-UV.pdf › Carotenoids/Muestra55_HPLC-UV.pdf]

RT: 0.00 - 61.20

NL:  
2.06E5  
Total Scan  
PDA 56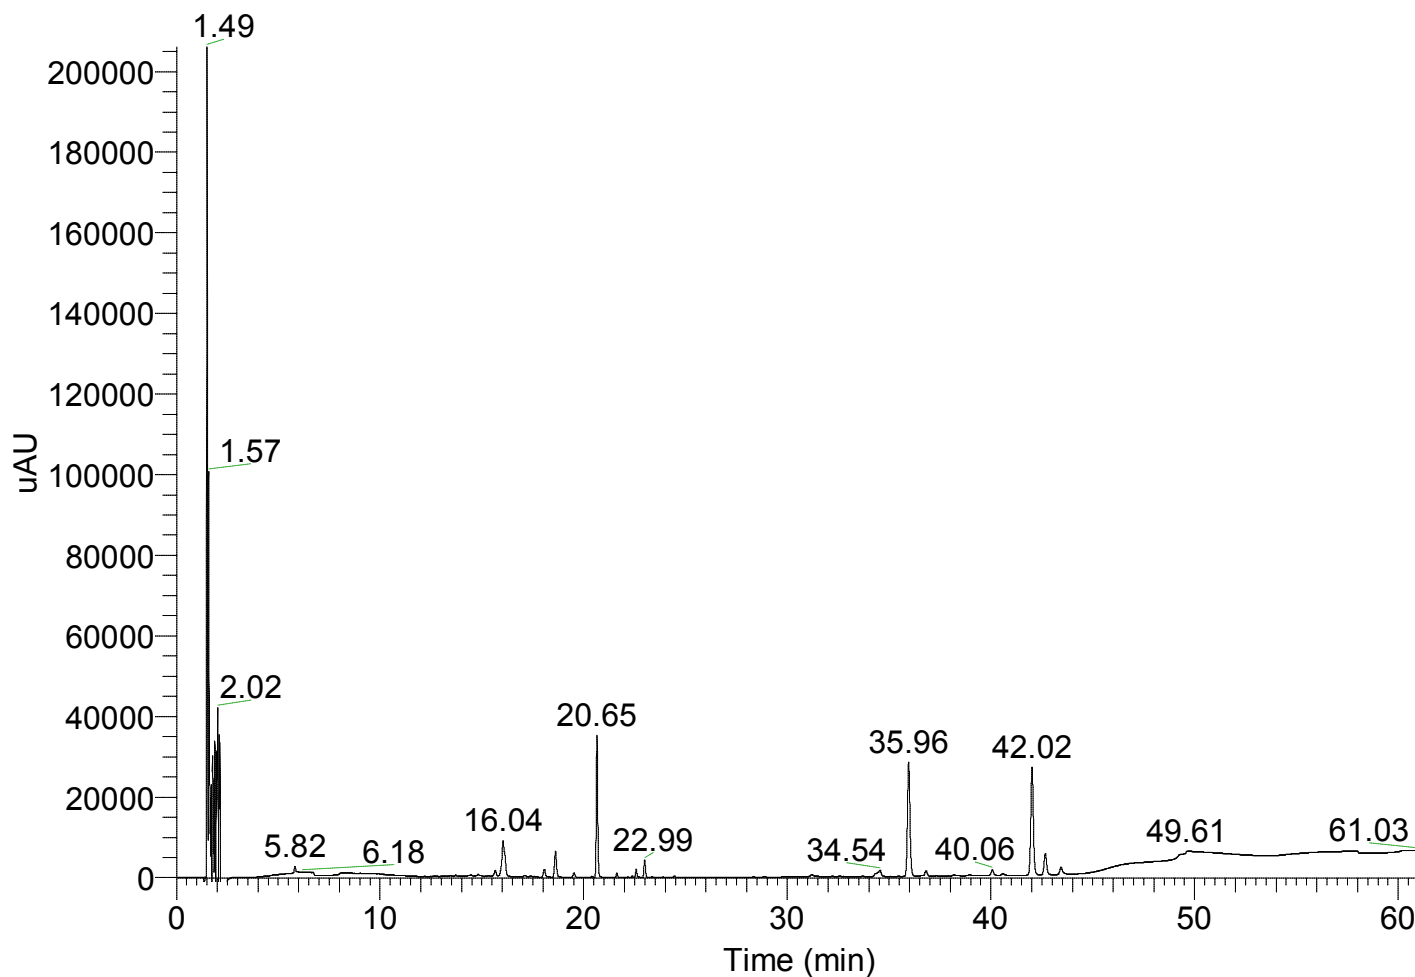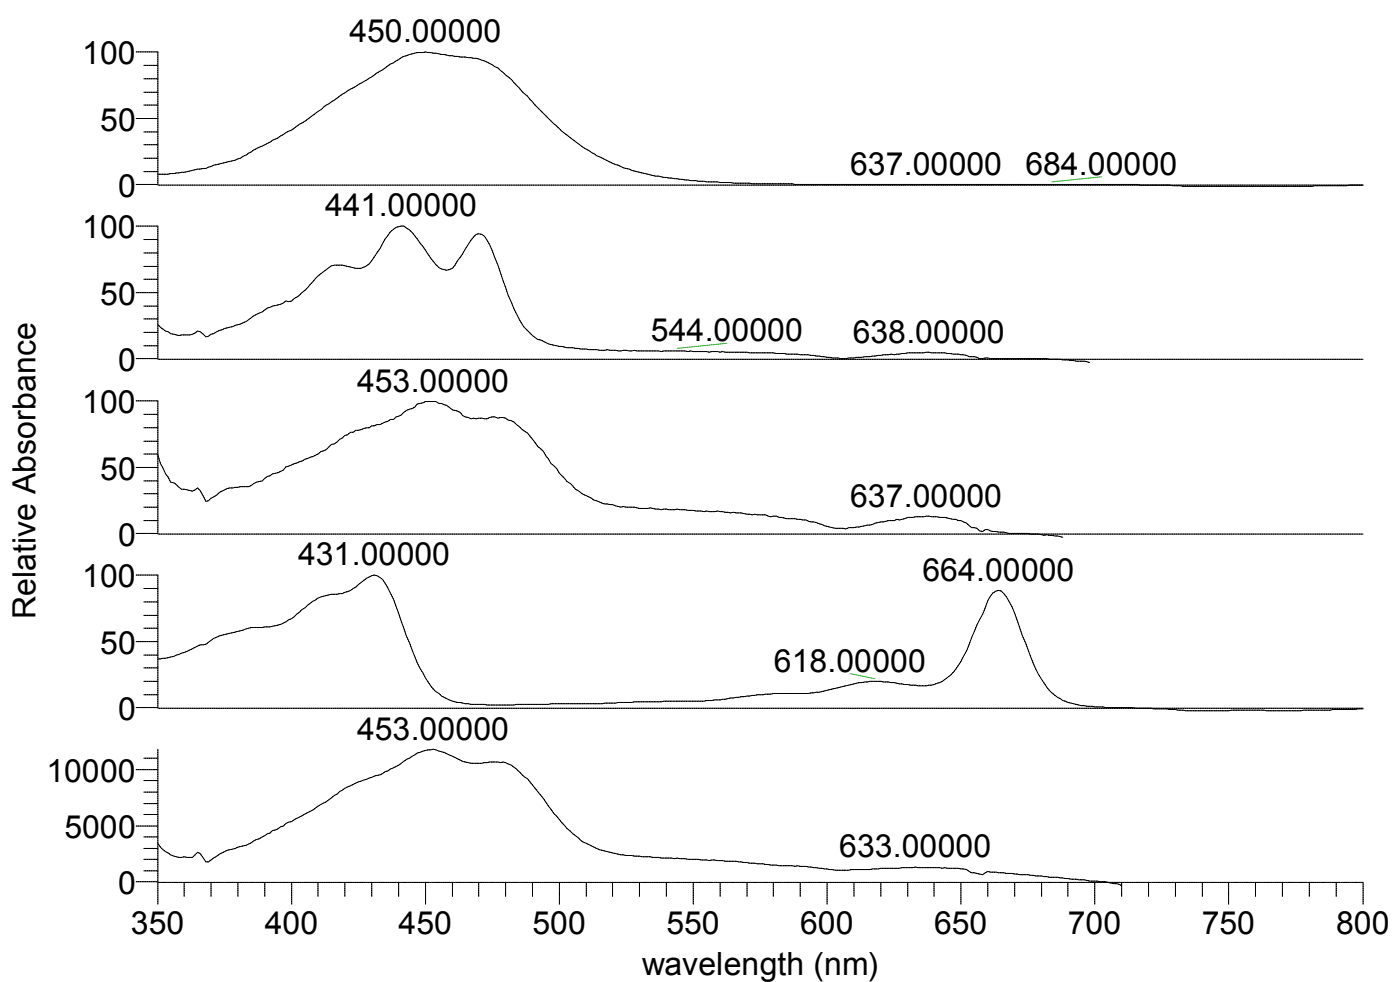NL:  
1.67E5  
56#6194 RT:  
20.65 AV: 1NL:  
8.22E3  
56#6483 RT:  
21.61 AV: 1NL:  
3.58E3  
56#7333 RT:  
24.44 AV: 1NL:  
1.27E5  
56#10788  
RT: 35.96  
AV: 1NL:  
1.18E4  
56#13033  
RT: 43.44  
AV: 1

Supplement: Data_Sheet_1.zip [file Muestra56_HPLC-UV.pdf › Carotenoids/Muestra56_HPLC-UV.pdf]

RT: 0.00 - 61.20

NL:  
2.10E5  
Total Scan  
PDA 57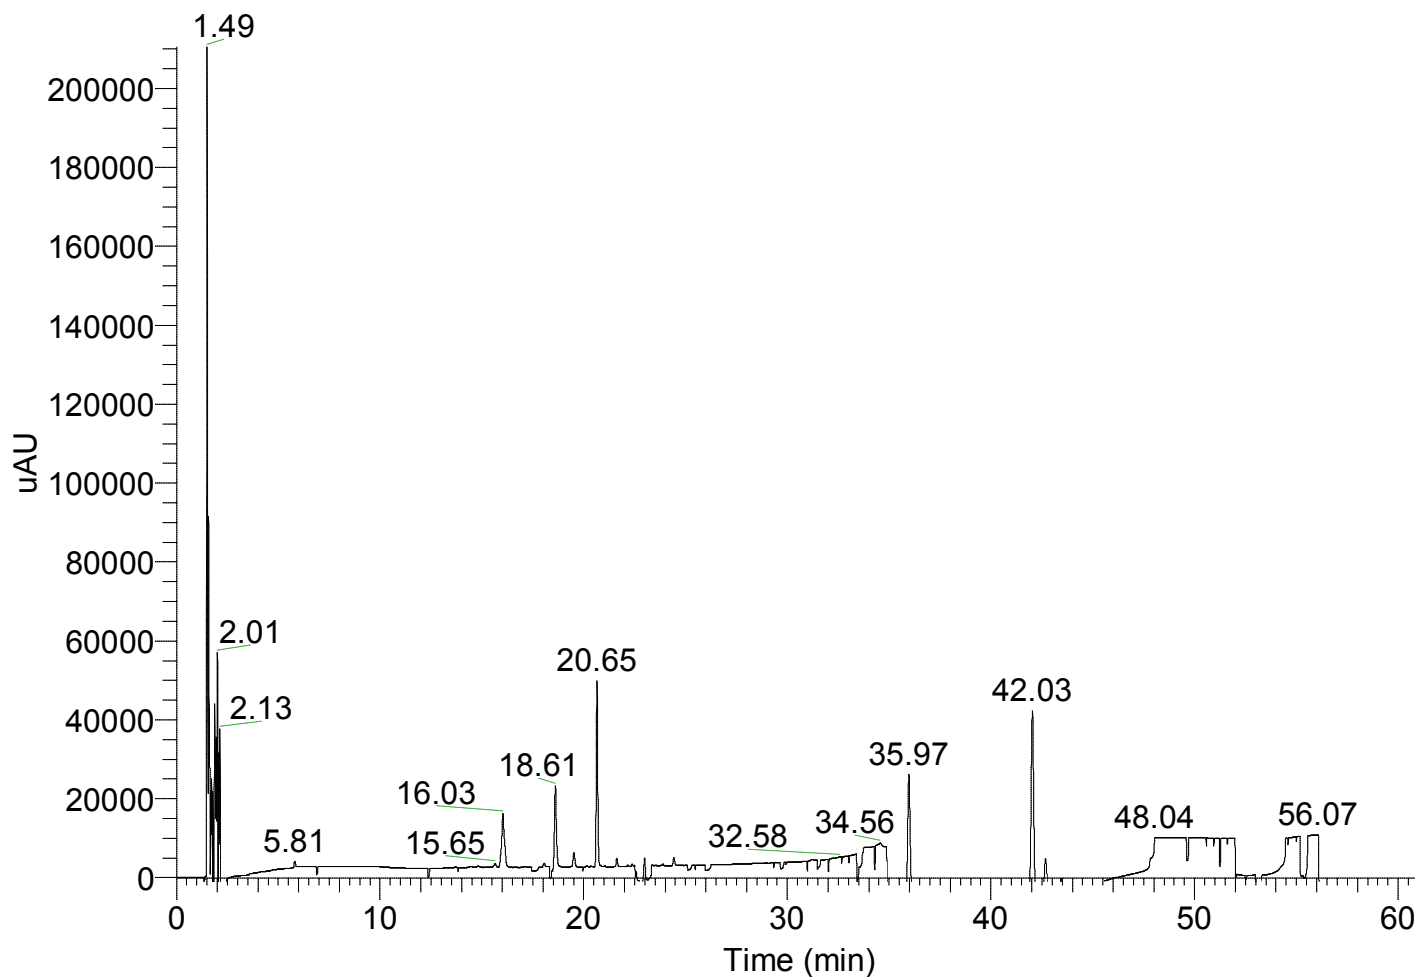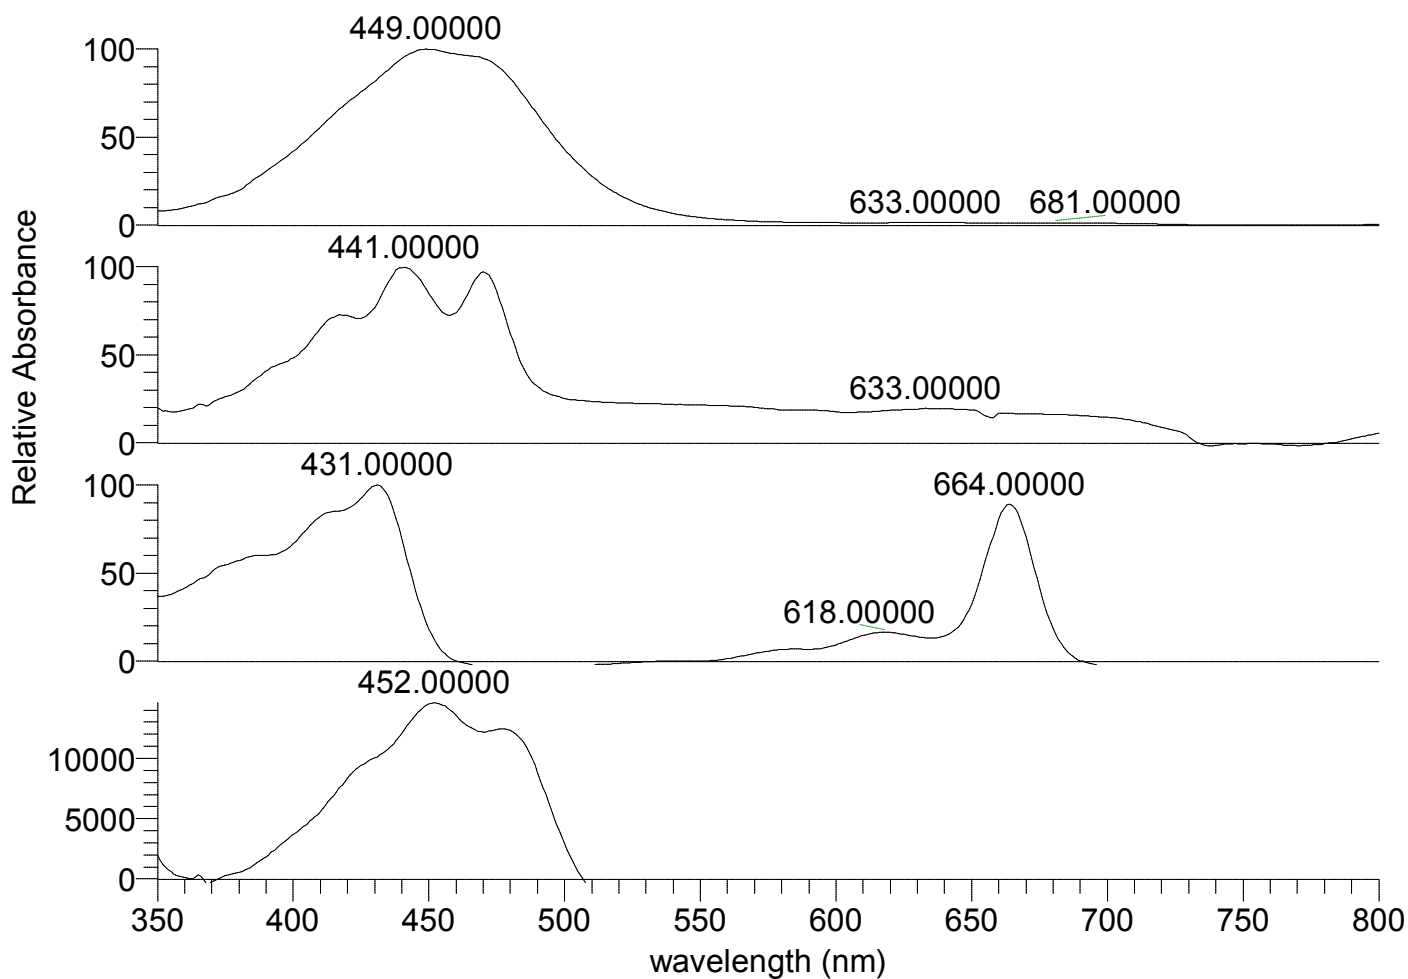NL:  
2.25E5  
57#6195  
RT: 20.65  
AV: 1NL:  
1.74E4  
57#6489  
RT: 21.63  
AV: 1NL:  
1.35E5  
57#10791  
RT: 35.97  
AV: 1NL:  
1.46E4  
57#13034  
RT: 43.45  
AV: 1

Supplement: Data_Sheet_1.zip [file Muestra57_HPLC-UV.pdf › Carotenoids/Muestra57_HPLC-UV.pdf]

RT: 0.00 - 61.20

NL:  
2.07E5  
Total Scan  
PDA 58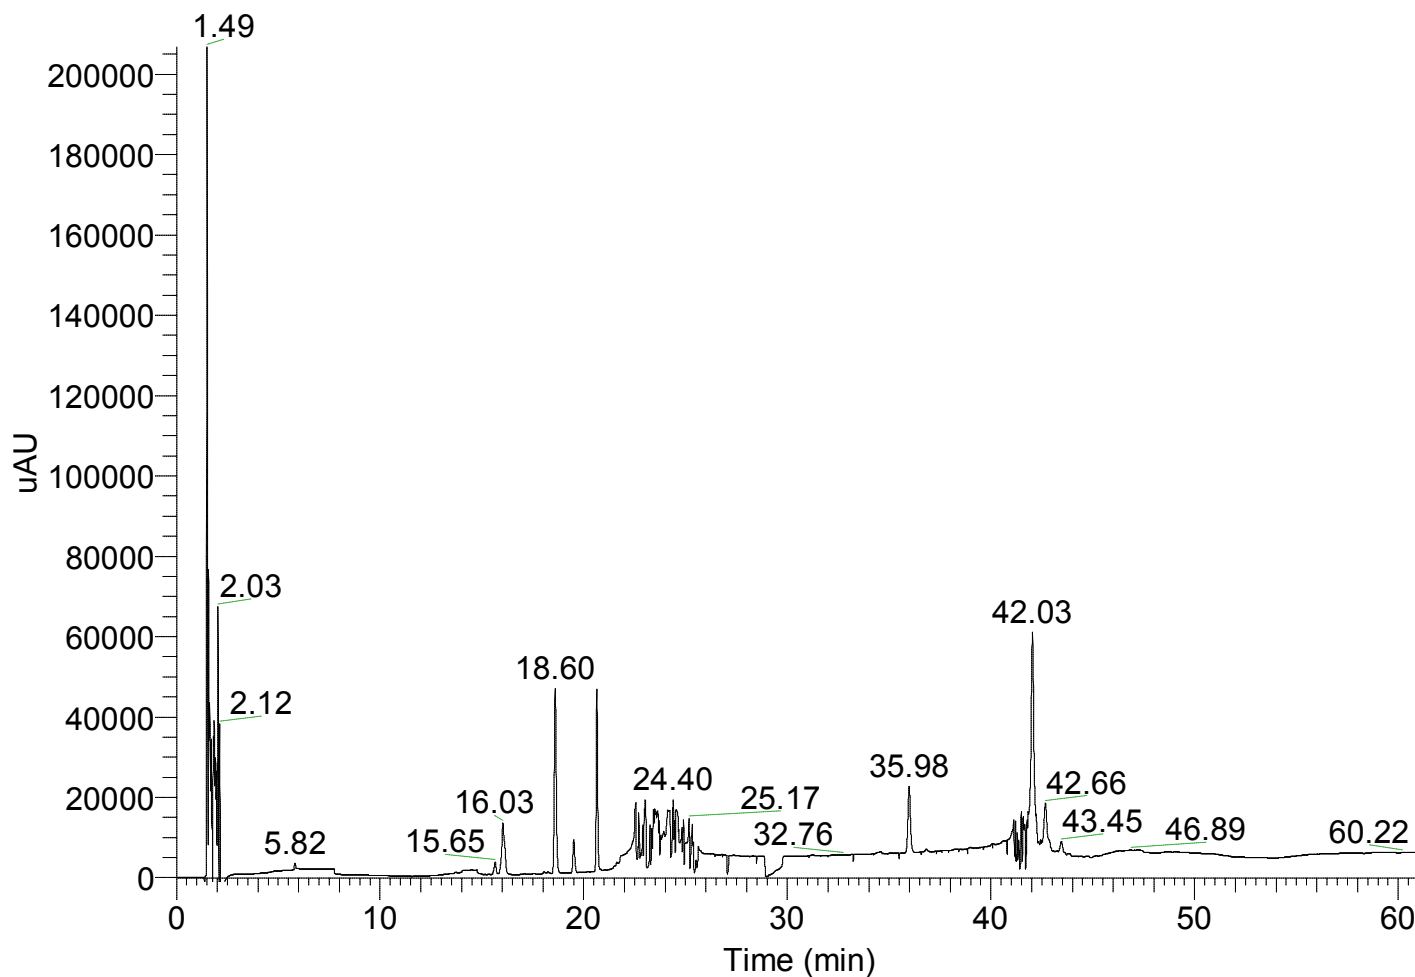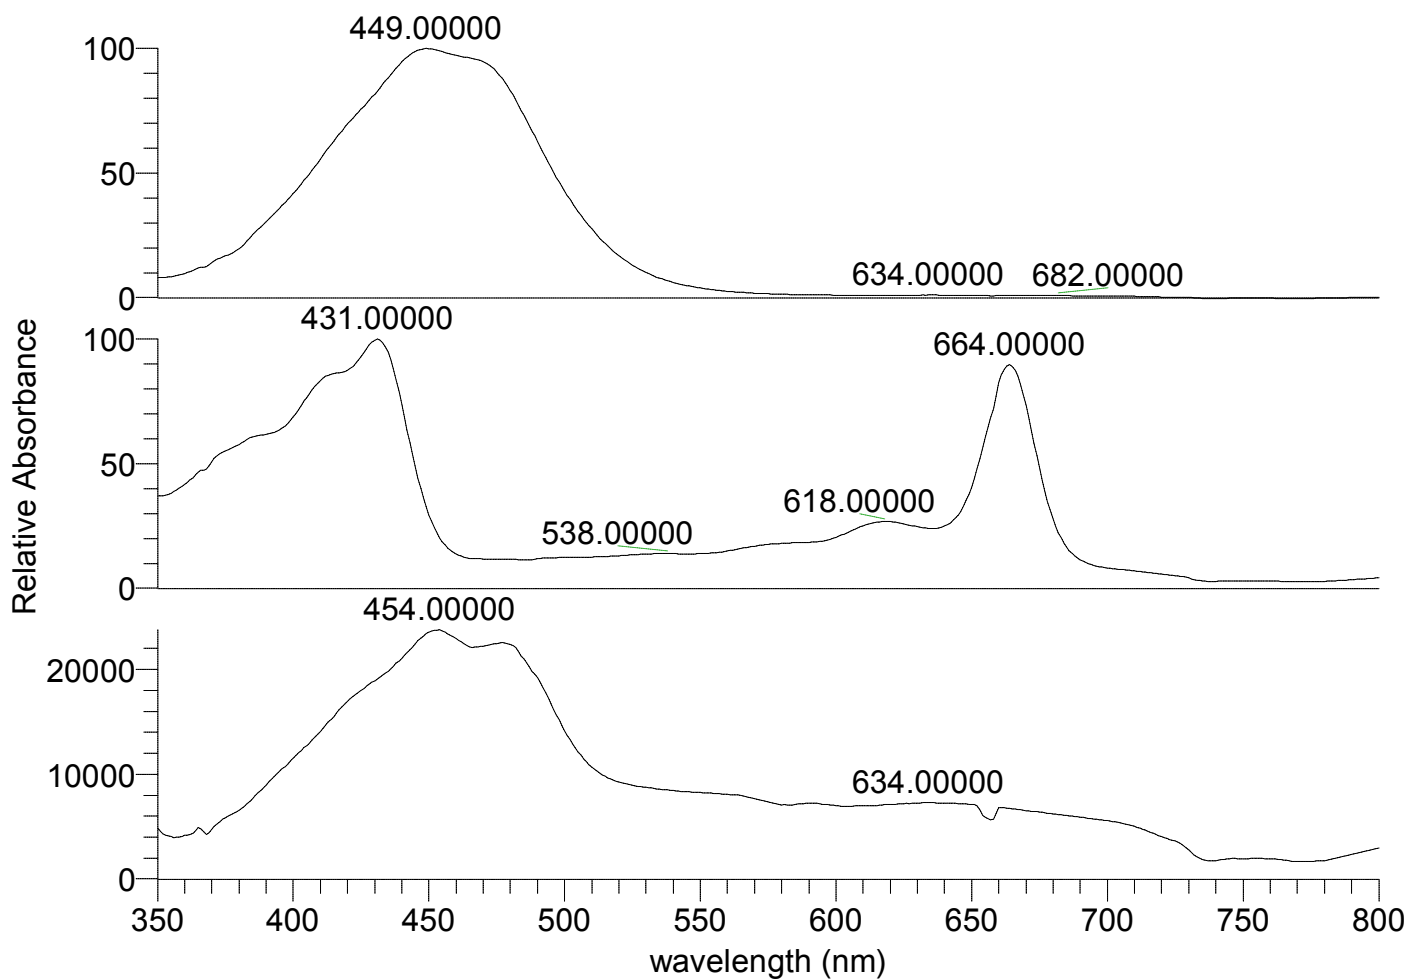NL:  
2.15E5  
58#6194  
RT: 20.65  
AV: 1NL:  
8.06E4  
58#10794  
RT: 35.98  
AV: 1NL:  
2.38E4  
58#13035  
RT: 43.45  
AV: 1

Supplement: Data_Sheet_1.zip [file Muestra58_HPLC-UV.pdf › Carotenoids/Muestra58_HPLC-UV.pdf]

RT: 0.00 - 61.20

NL:  
2.06E5  
Total Scan  
PDA 59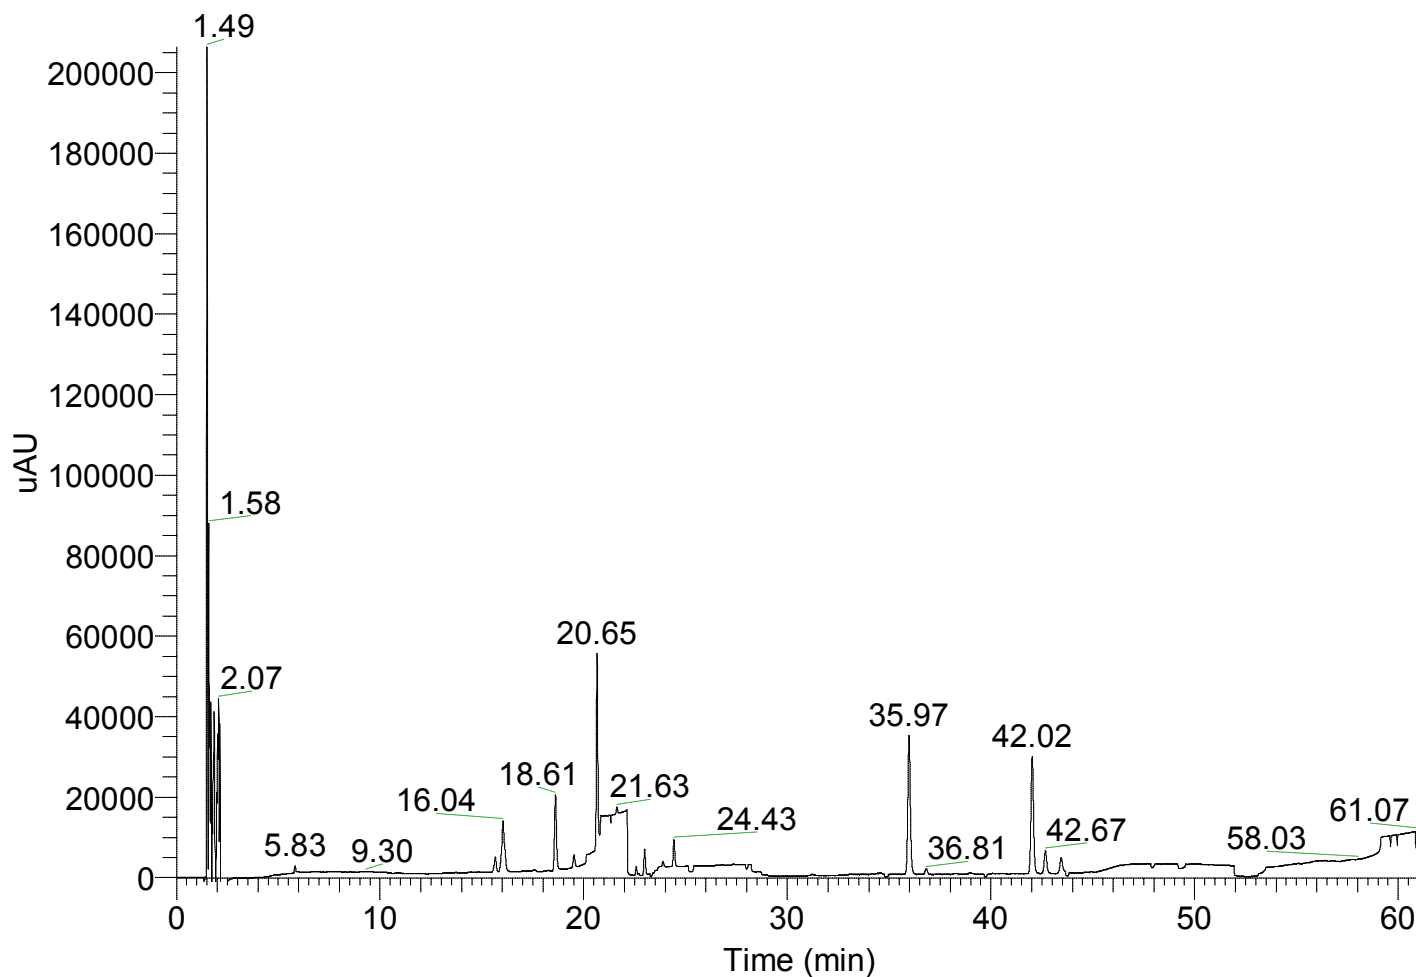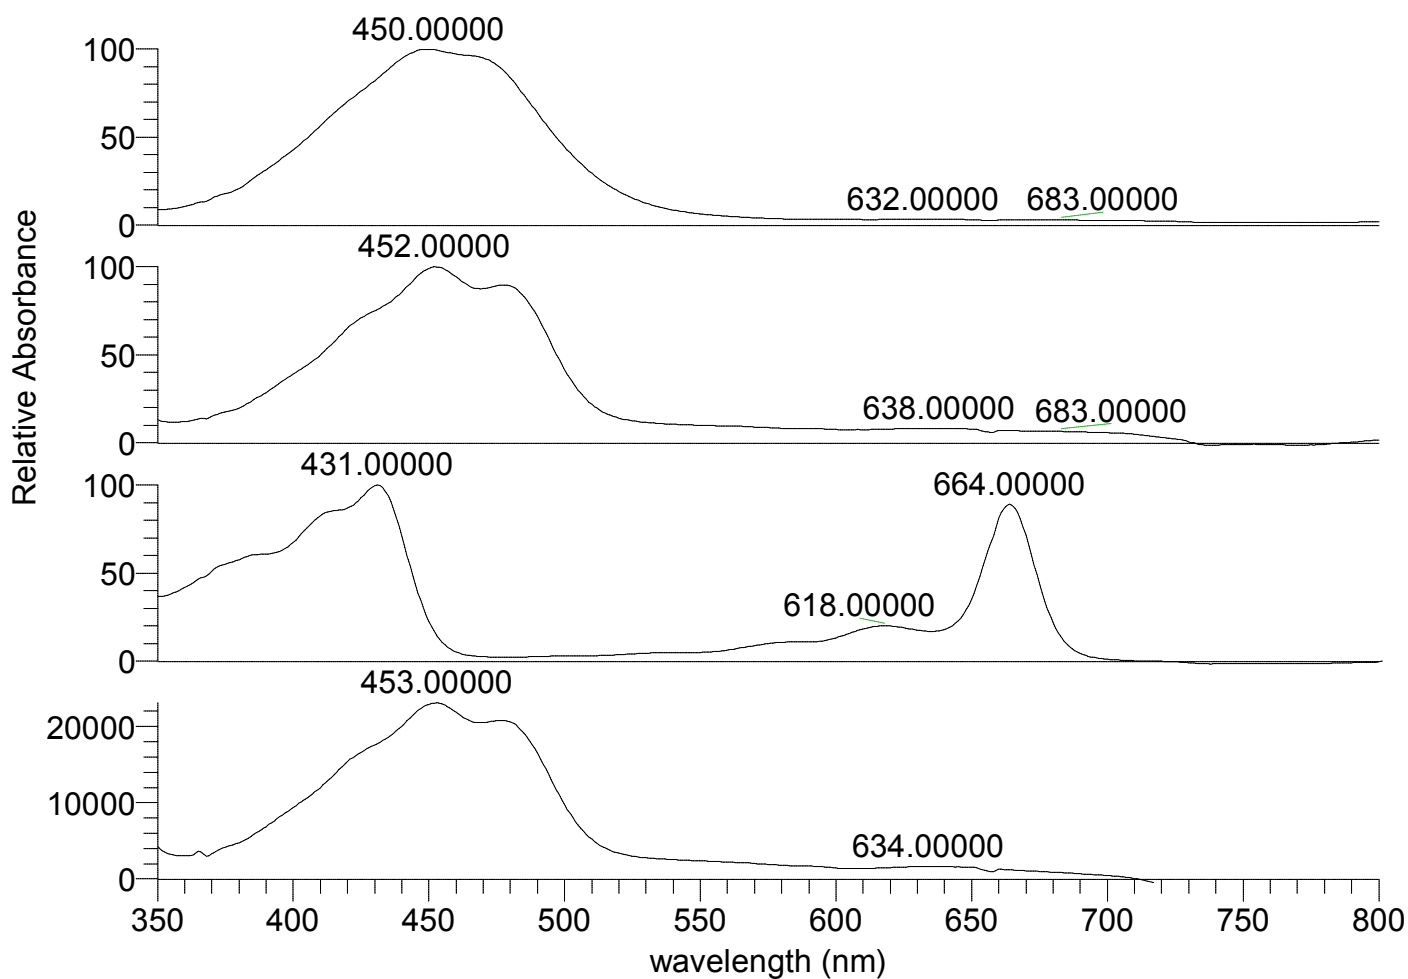NL:  
2.37E5  
59#6195  
RT: 20.65  
AV: 1NL:  
3.98E4  
59#7329  
RT: 24.43  
AV: 1NL:  
1.54E5  
59#10791  
RT: 35.97  
AV: 1NL:  
2.31E4  
59#13034  
RT: 43.45  
AV: 1

Supplement: Data_Sheet_1.zip [file Muestra59_HPLC-UV.pdf › Carotenoids/Muestra59_HPLC-UV.pdf]

RT: 0.00 - 61.20

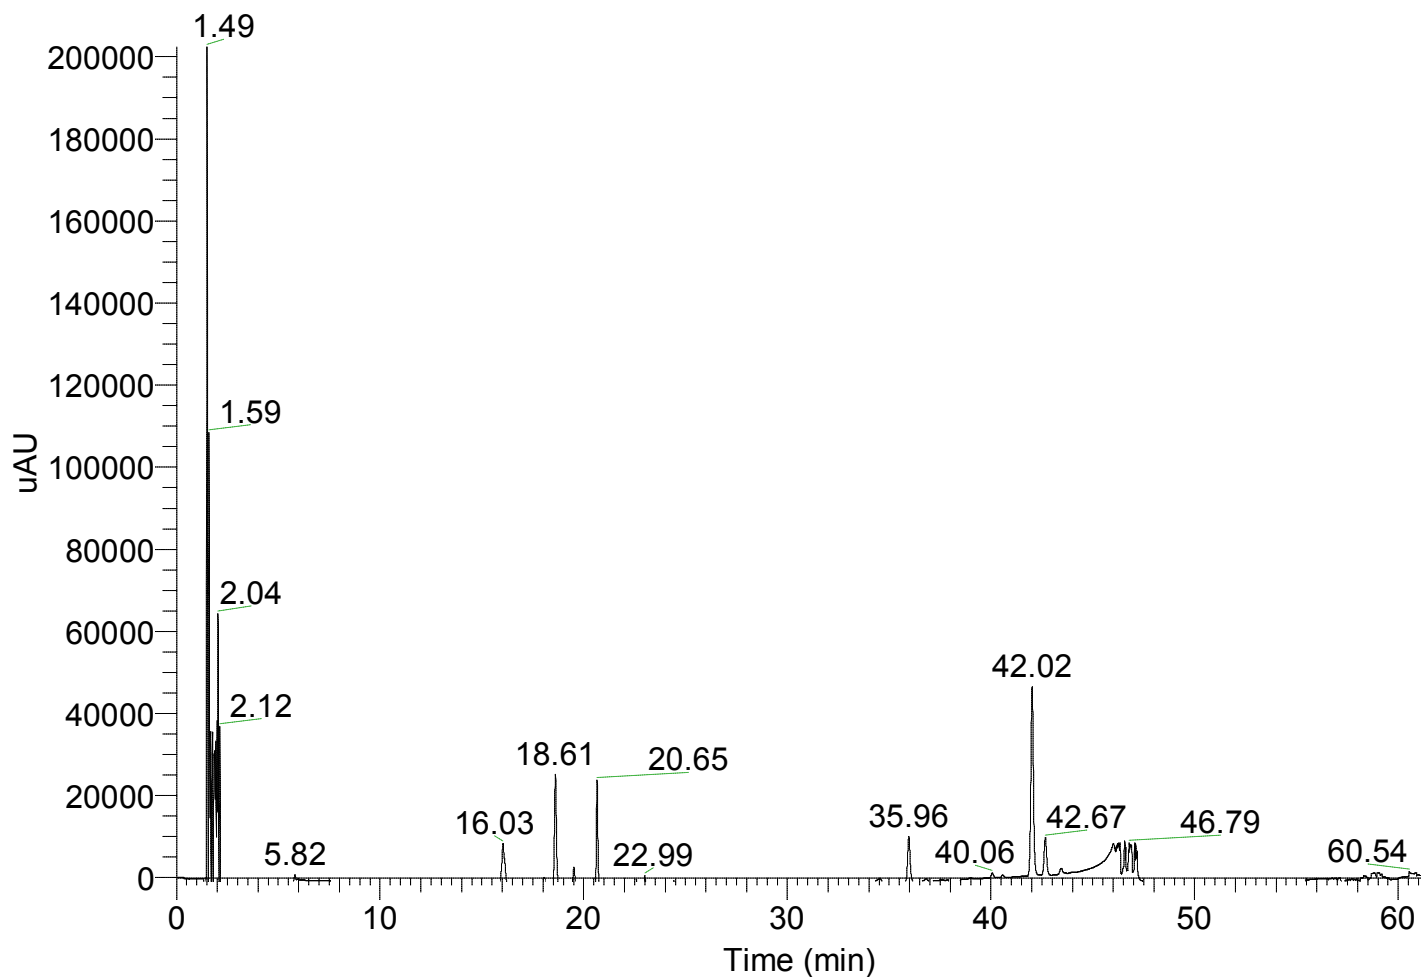

NL:  
2.02E5  
Total Scan  
PDA 60

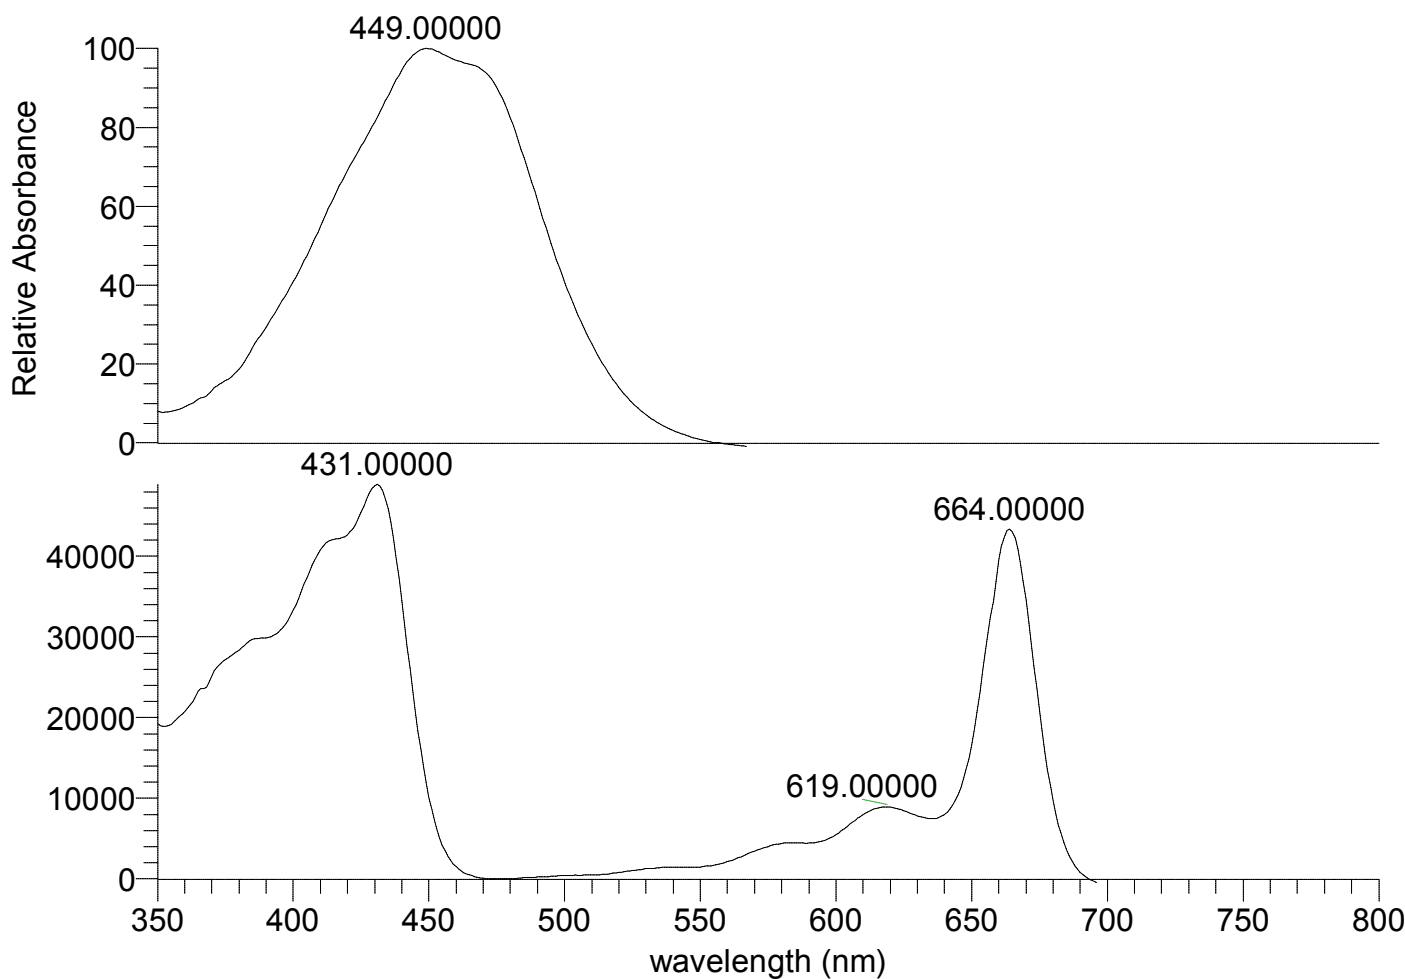

NL:  
1.21E5  
60#6195  
RT: 20.65  
AV: 1

NL:  
4.89E4  
60#10789  
RT: 35.96  
AV: 1

Supplement: Data_Sheet_1.zip [file Muestra60_HPLC-UV.pdf › Carotenoids/Muestra60_HPLC-UV.pdf]

RT: 0.00 - 61.20

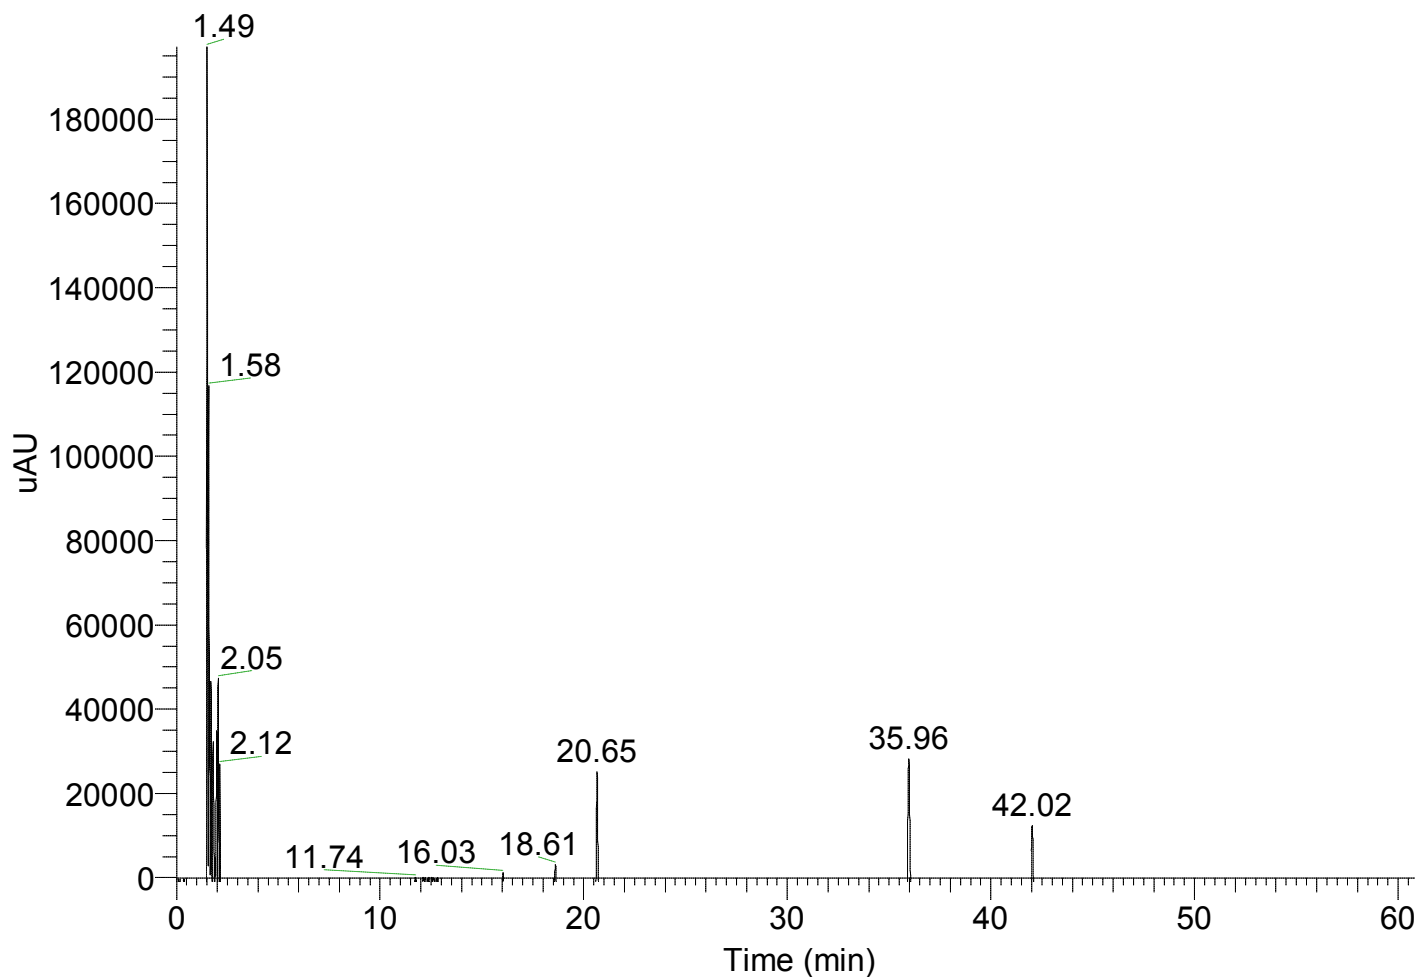

NL:  
1.97E5  
Total Scan  
PDA 61

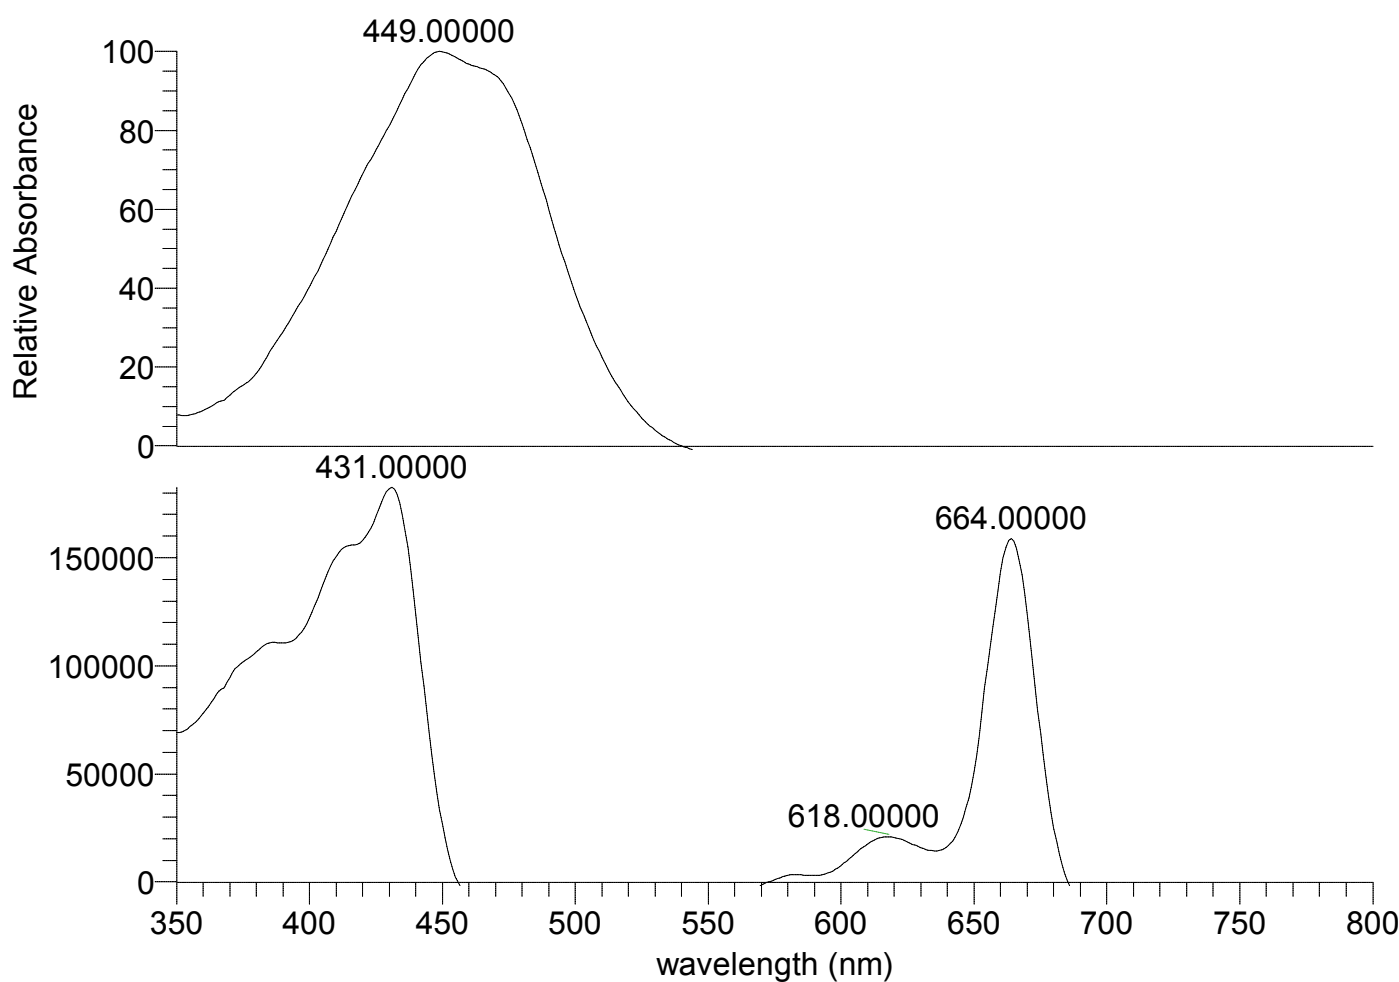

NL:  
1.42E5  
61#6195  
RT: 20.65  
AV: 1

NL:  
1.82E5  
61#10789  
RT: 35.96  
AV: 1

Supplement: Data_Sheet_1.zip [file Muestra61_HPLC-UV.pdf › Carotenoids/Muestra61_HPLC-UV.pdf]

RT: 0.00 - 61.20

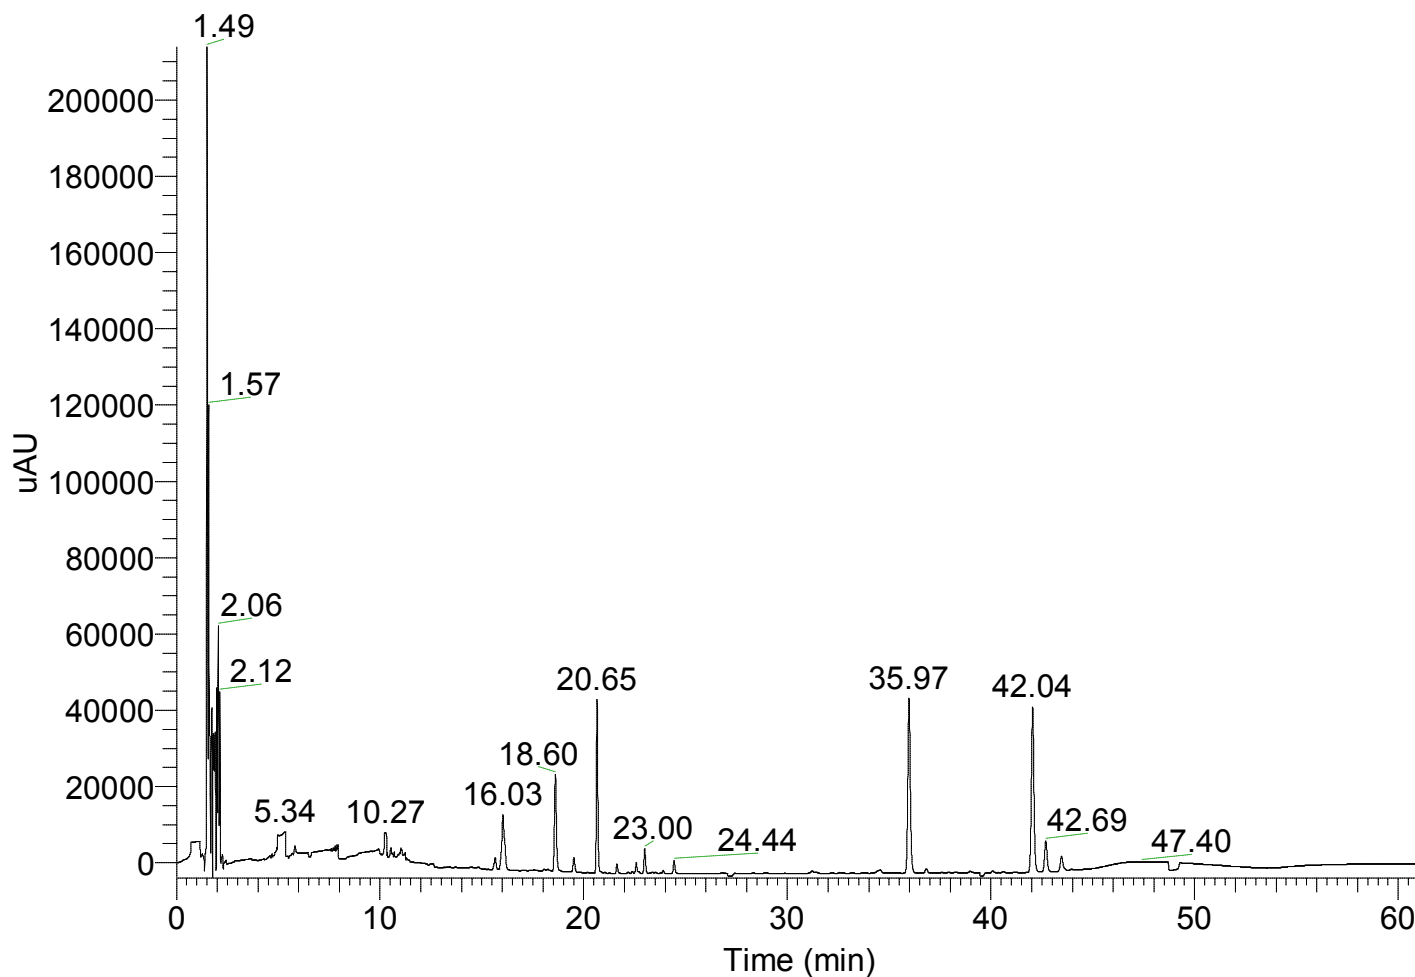

NL:  
2.14E5  
Total Scan  
PDA 62

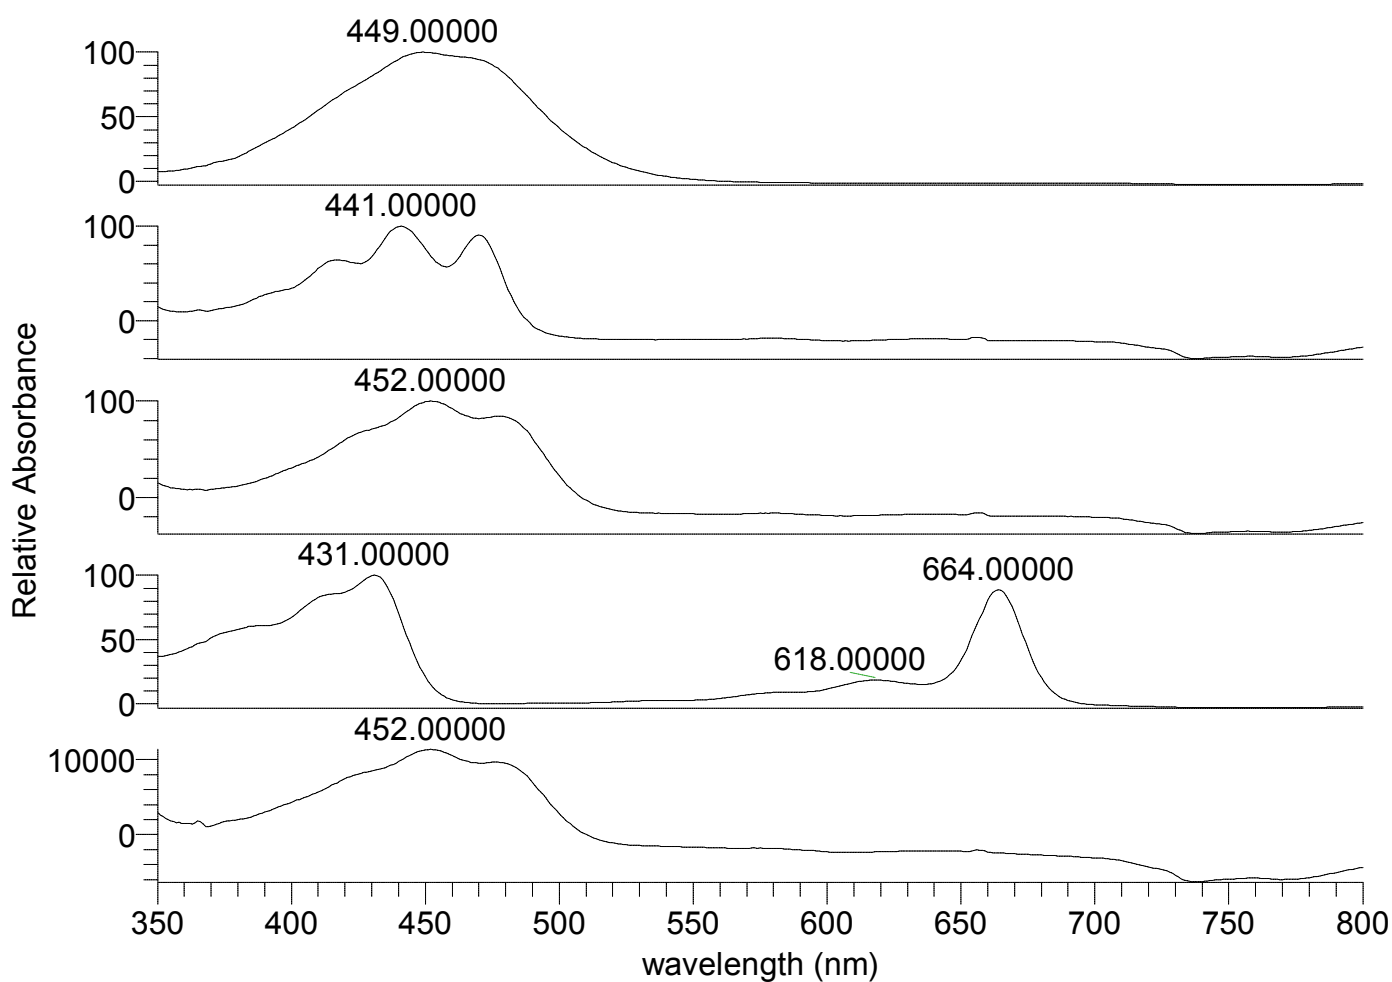

NL:  
2.08E5  
62#6194 RT:  
20.65 AV: 1

NL:  
1.38E4  
62#6488 RT:  
21.63 AV: 1

NL:  
1.57E4  
62#7331 RT:  
24.44 AV: 1

NL:  
1.99E5  
62#10790  
RT: 35.97  
AV: 1

NL:  
1.13E4  
62#13022  
RT: 43.41  
AV: 1

Supplement: Data_Sheet_1.zip [file Muestra62_HPLC-UV.pdf › Carotenoids/Muestra62_HPLC-UV.pdf]

RT: 0.00 - 61.20

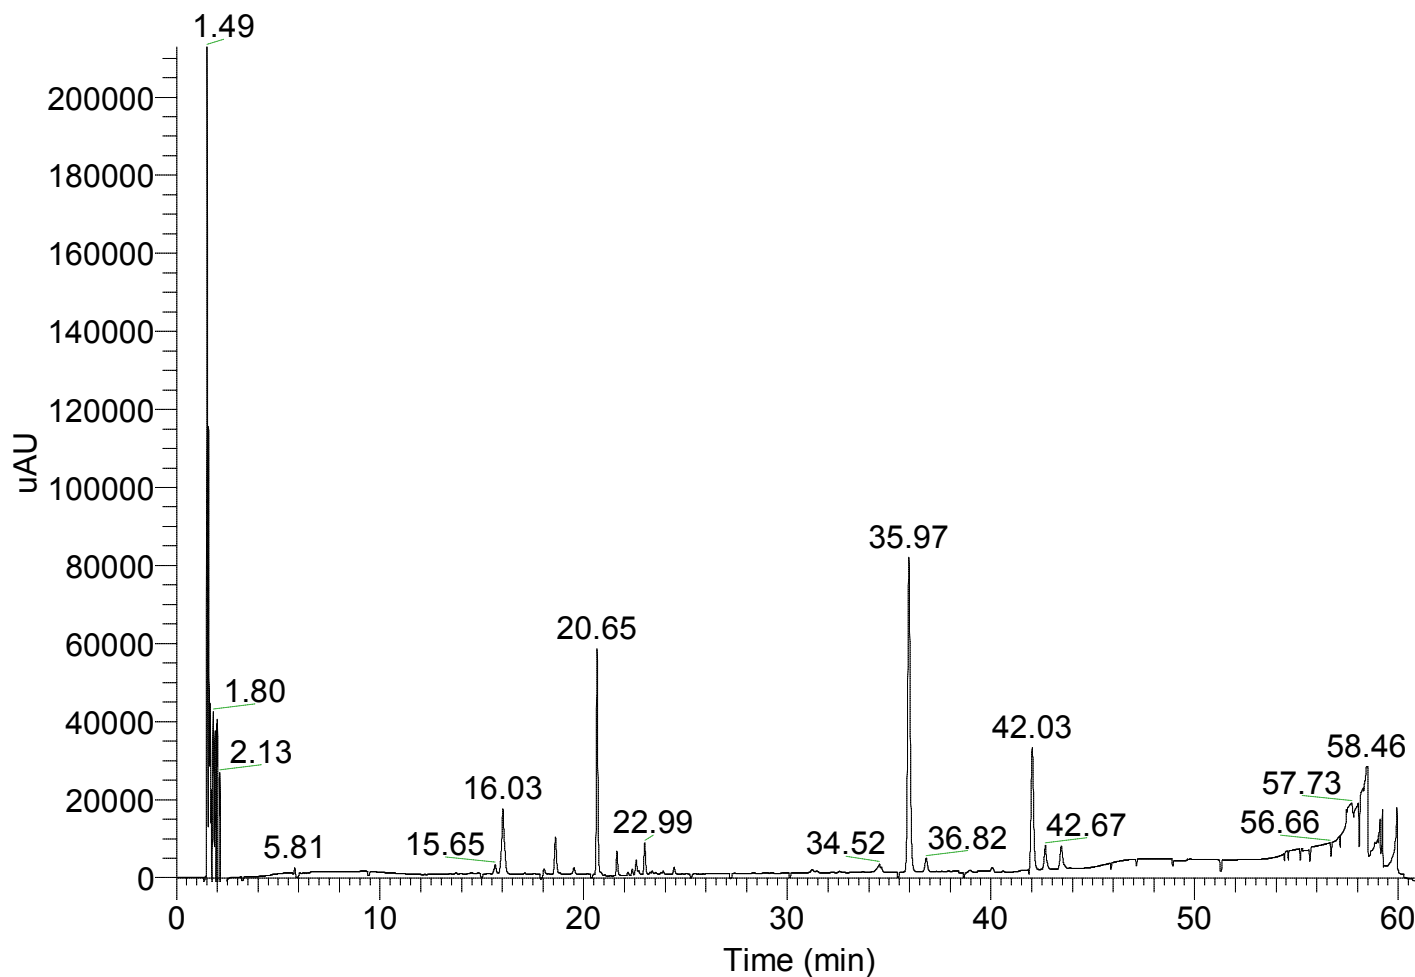

NL:  
2.13E5  
Total Scan  
PDA 63

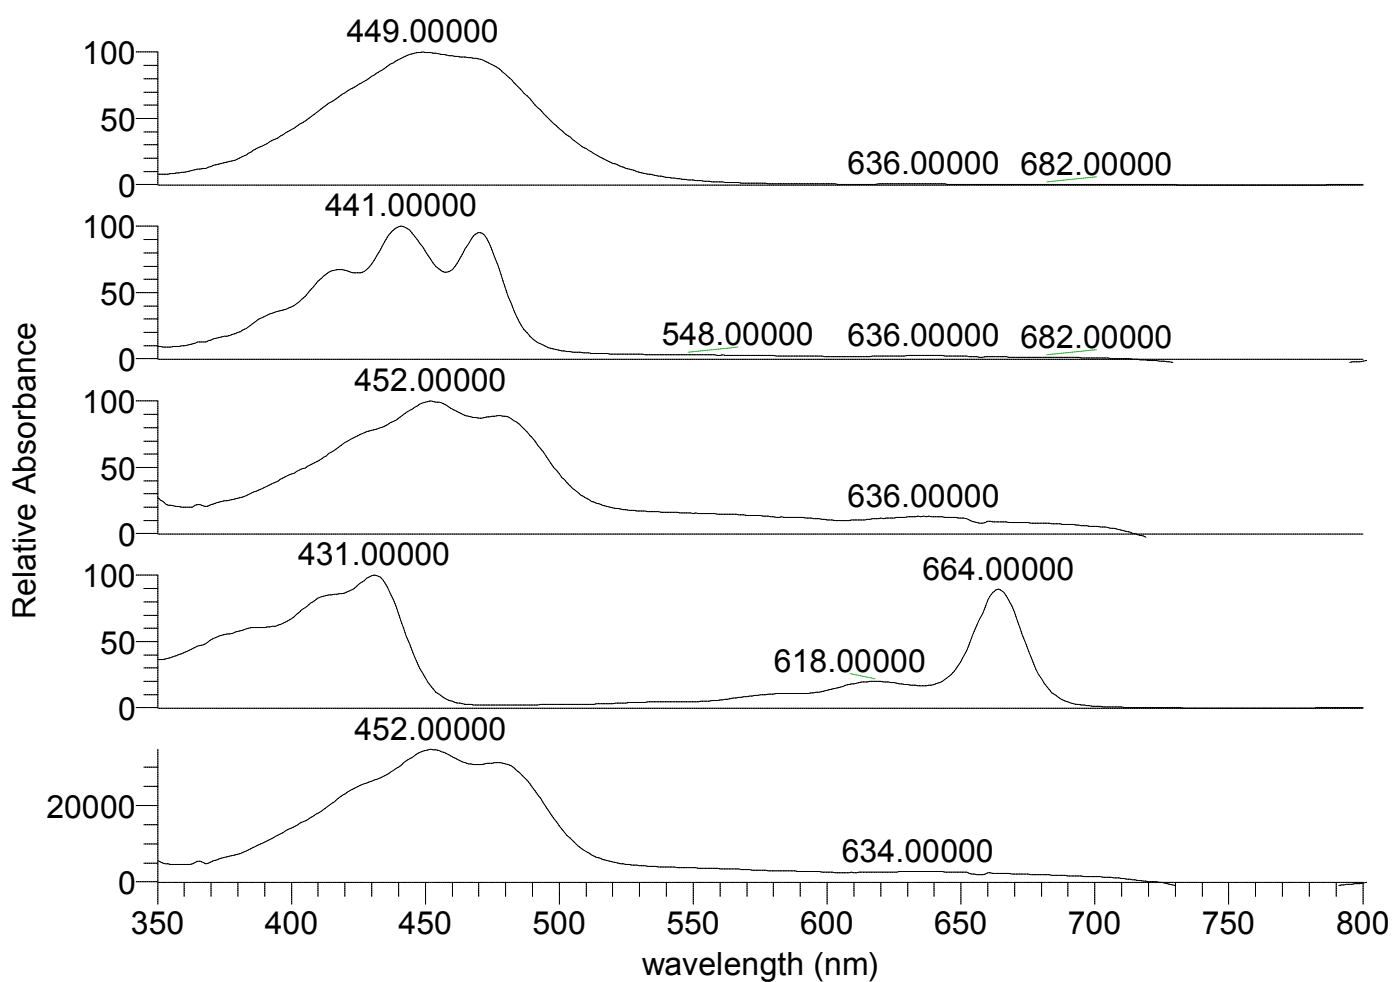

NL:  
2.66E5  
63#6194 RT:  
20.65 AV: 1

NL:  
4.08E4  
63#6489 RT:  
21.63 AV: 1

NL:  
1.11E4  
63#7332 RT:  
24.44 AV: 1

NL:  
3.58E5  
63#10791  
RT: 35.97  
AV: 1

NL:  
3.47E4  
63#13036  
RT: 43.45  
AV: 1

Supplement: Data_Sheet_1.zip [file Muestra63_HPLC-UV.pdf › Carotenoids/Muestra63_HPLC-UV.pdf]

RT: 0.00 - 61.20

NL:  
2.10E5  
Total Scan  
PDA 64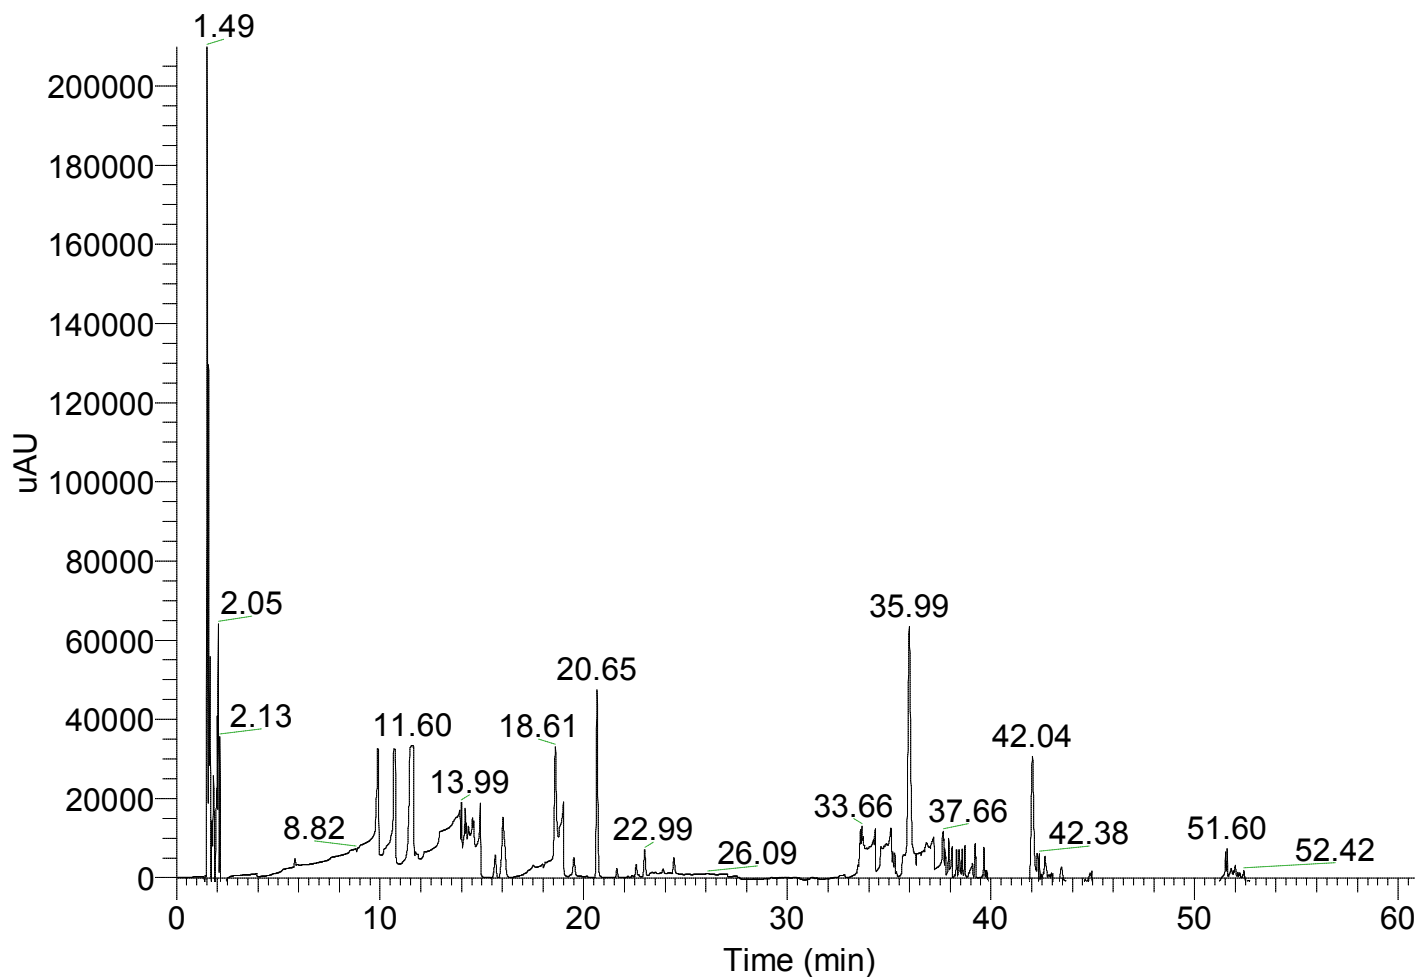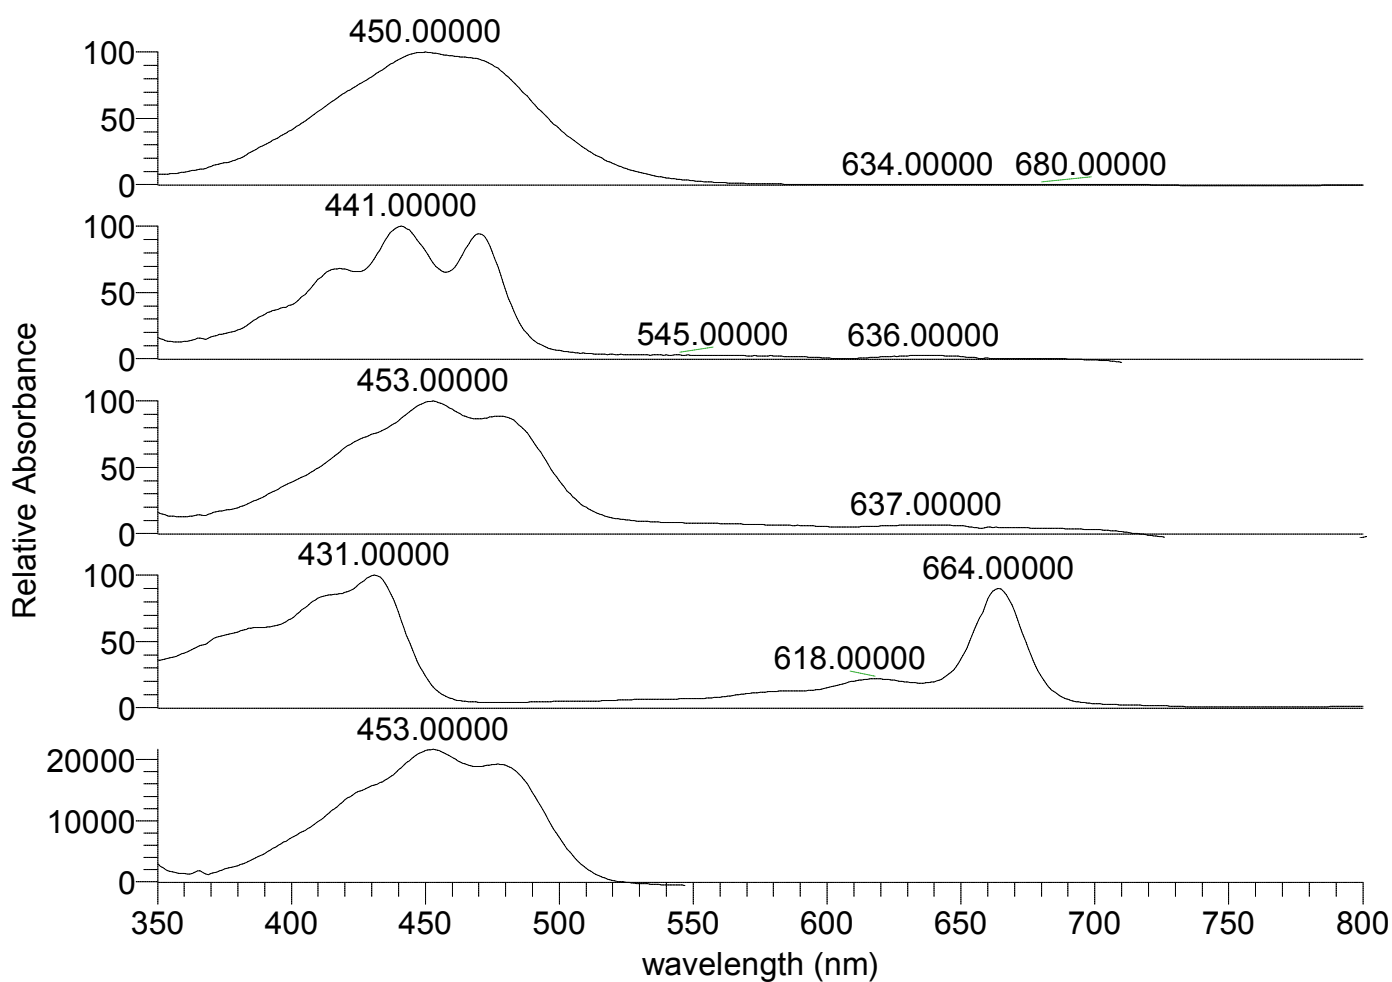NL:  
2.24E5  
64#6195 RT:  
20.65 AV: 1NL:  
1.57E4  
64#6489 RT:  
21.63 AV: 1NL:  
2.22E4  
64#7333 RT:  
24.44 AV: 1NL:  
2.60E5  
64#10798  
RT: 35.99  
AV: 1NL:  
2.16E4  
64#13036  
RT: 43.45  
AV: 1

Supplement: Data_Sheet_1.zip [file Muestra64_HPLC-UV.pdf › Carotenoids/Muestra64_HPLC-UV.pdf]

RT: 0.00 - 61.20

NL:  
2.08E5  
Total Scan  
PDA 66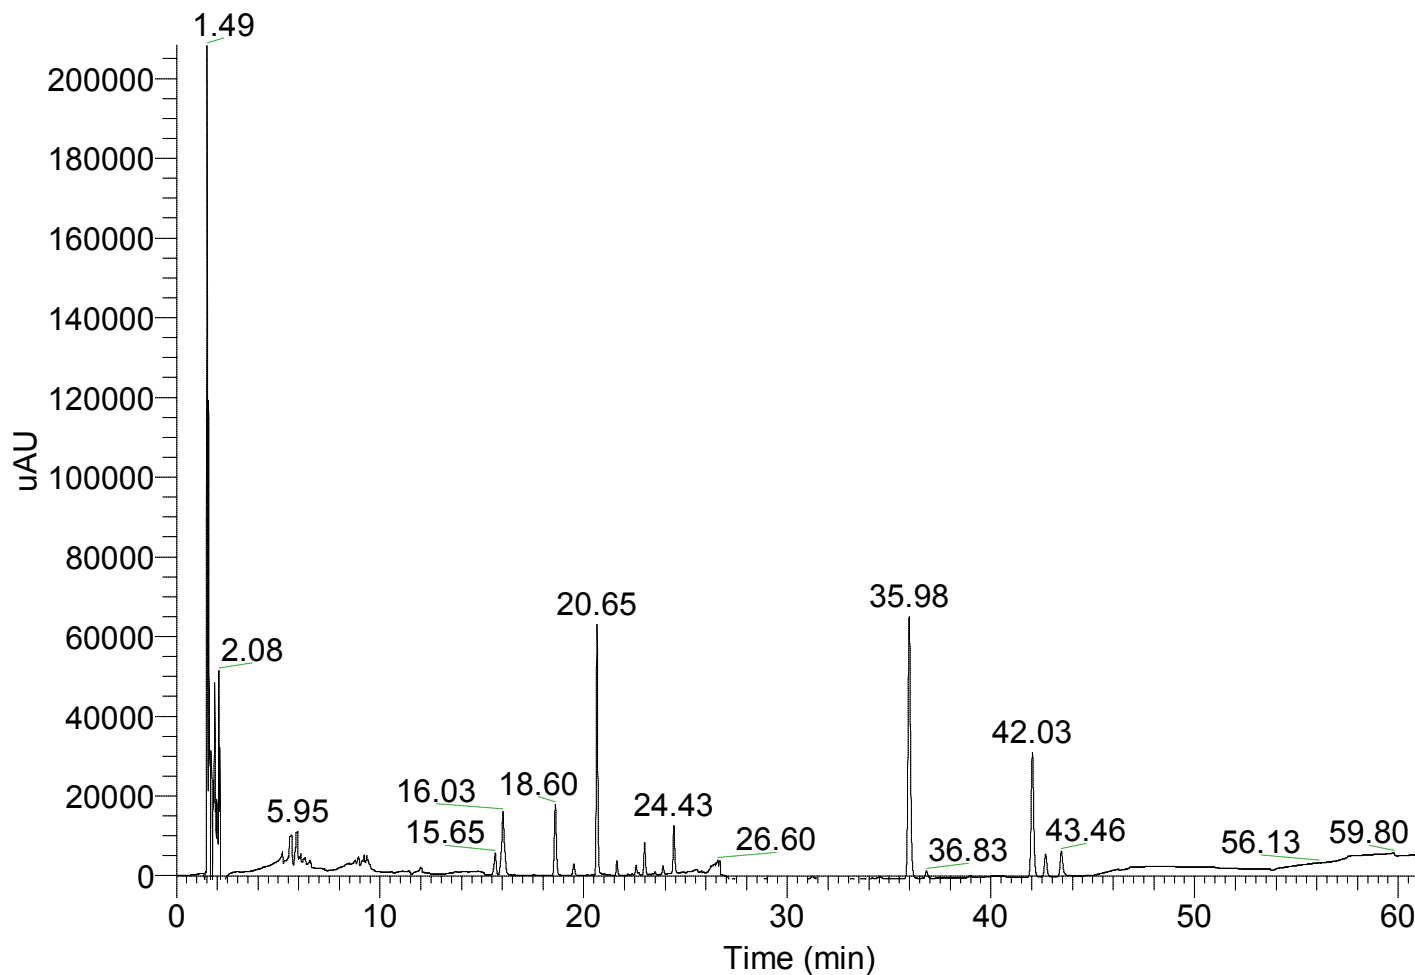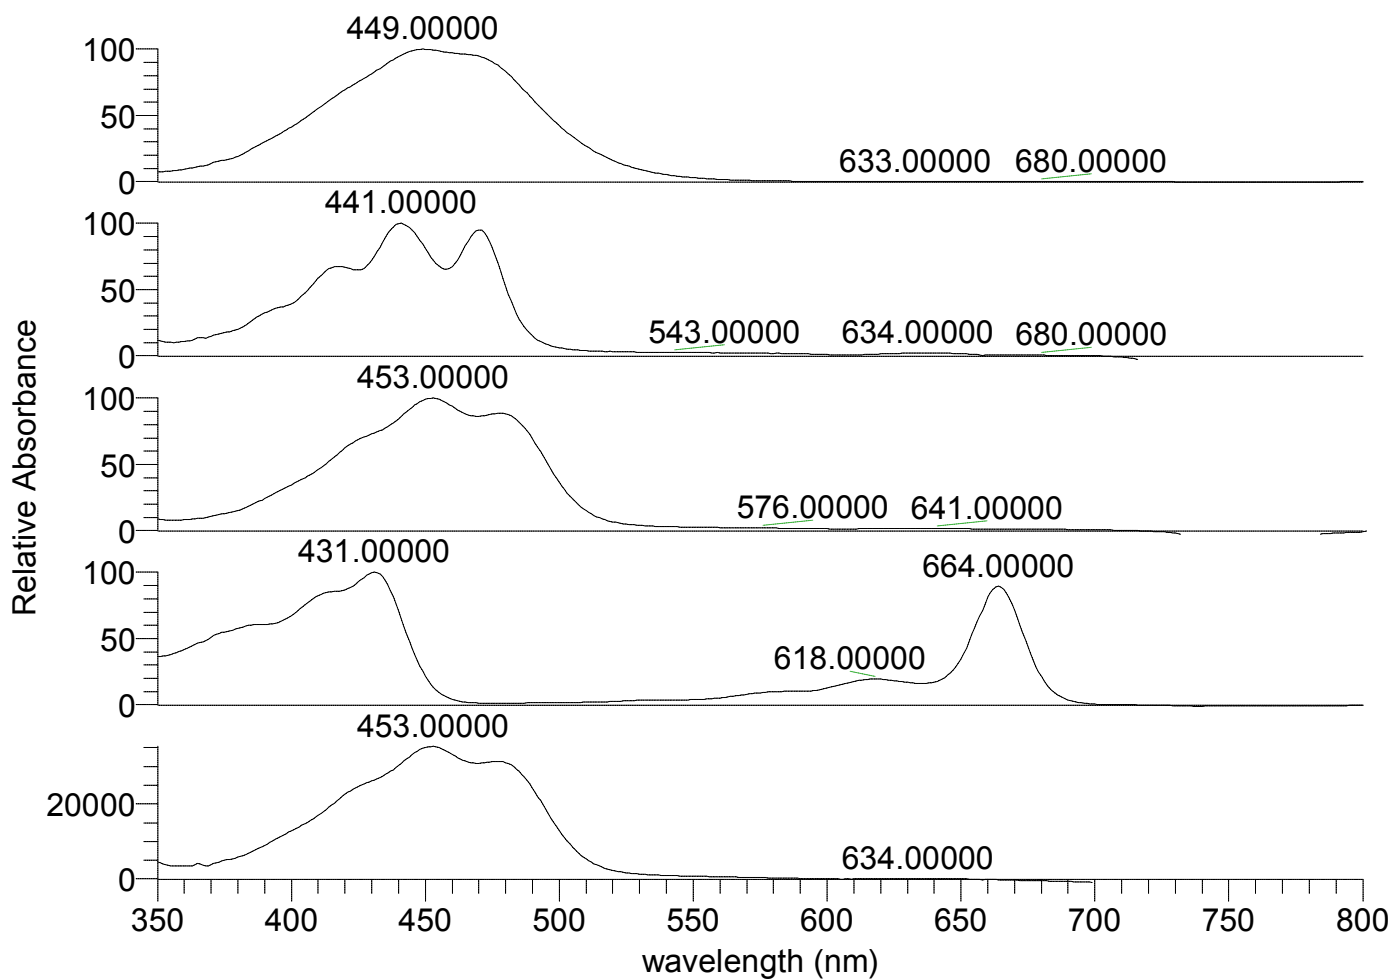NL:  
2.96E5  
66#6195 RT:  
20.65 AV: 1NL:  
2.44E4  
66#6488 RT:  
21.63 AV: 1NL:  
6.49E4  
66#7329 RT:  
24.43 AV: 1NL:  
2.91E5  
66#10794  
RT: 35.98  
AV: 1NL:  
3.53E4  
66#13037  
RT: 43.46  
AV: 1

Supplement: Data_Sheet_1.zip [file Muestra66_HPLC-UV.pdf › Carotenoids/Muestra66_HPLC-UV.pdf]

RT: 0.00 - 61.20

NL:  
1.98E5  
Total Scan  
PDA 67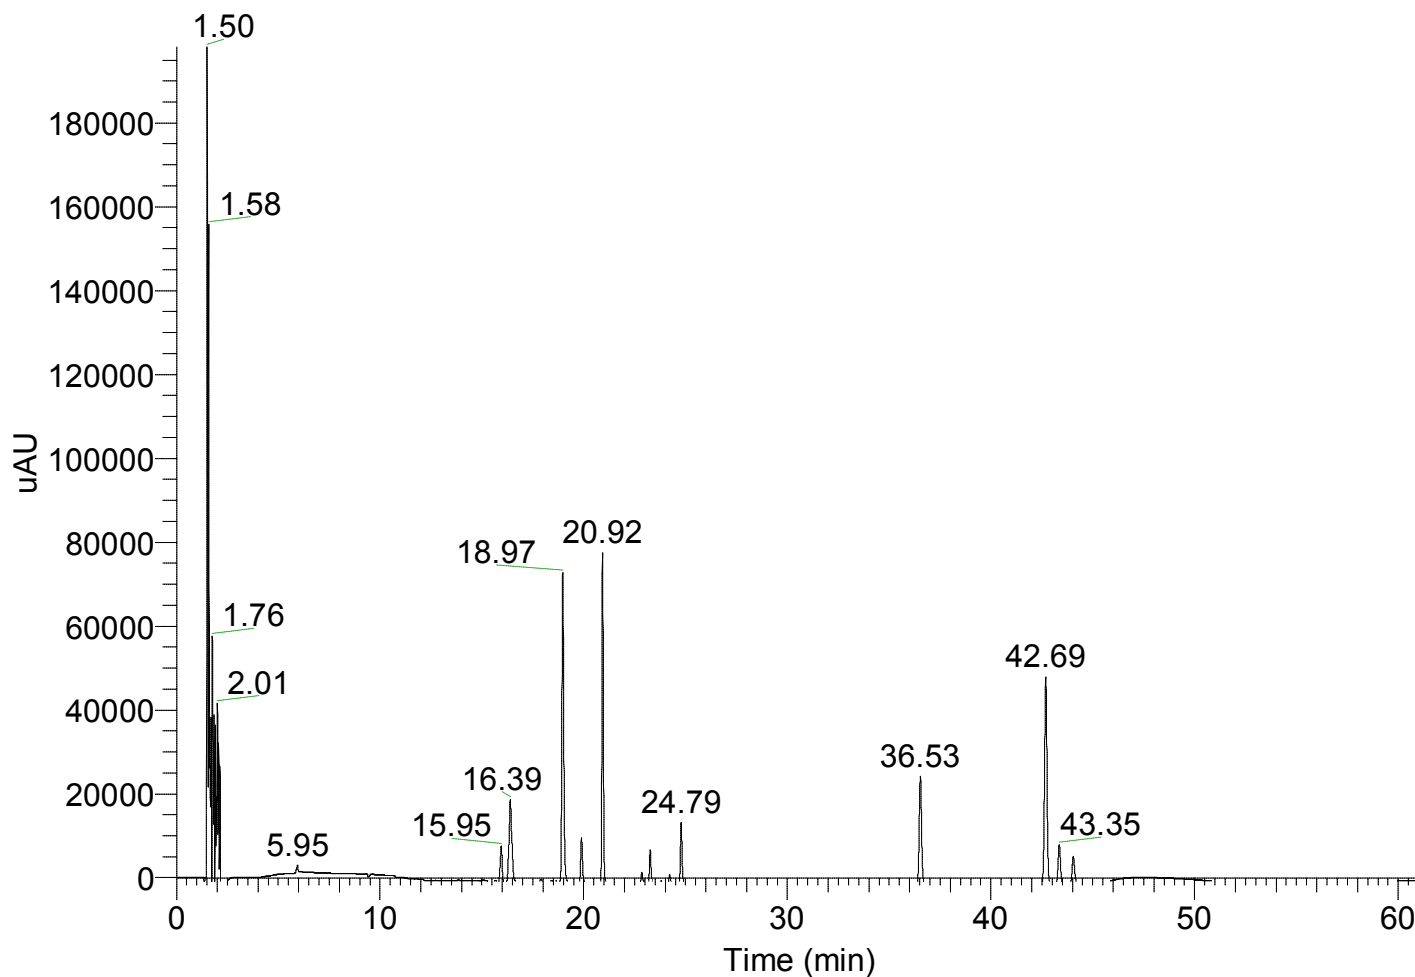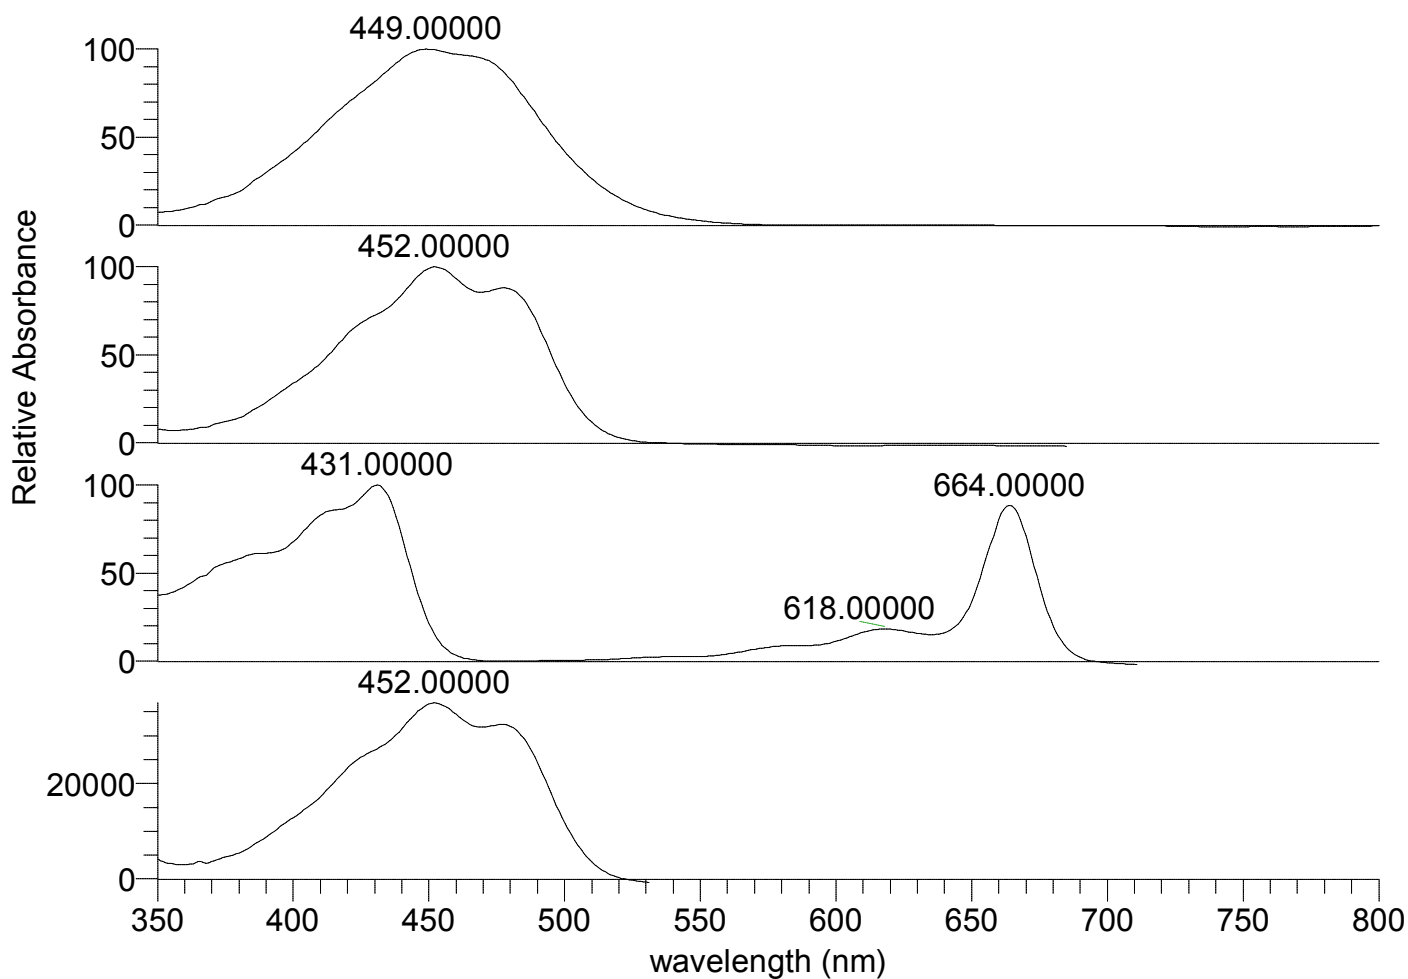NL:  
3.59E5  
67#6275  
RT: 20.92  
AV: 1NL:  
7.69E4  
67#7437  
RT: 24.79  
AV: 1NL:  
1.14E5  
67#10959  
RT: 36.53  
AV: 1NL:  
3.68E4  
67#13211  
RT: 44.04  
AV: 1

Supplement: Data_Sheet_1.zip [file Muestra67_HPLC-UV.pdf › Carotenoids/Muestra67_HPLC-UV.pdf]

RT: 0.00 - 61.20

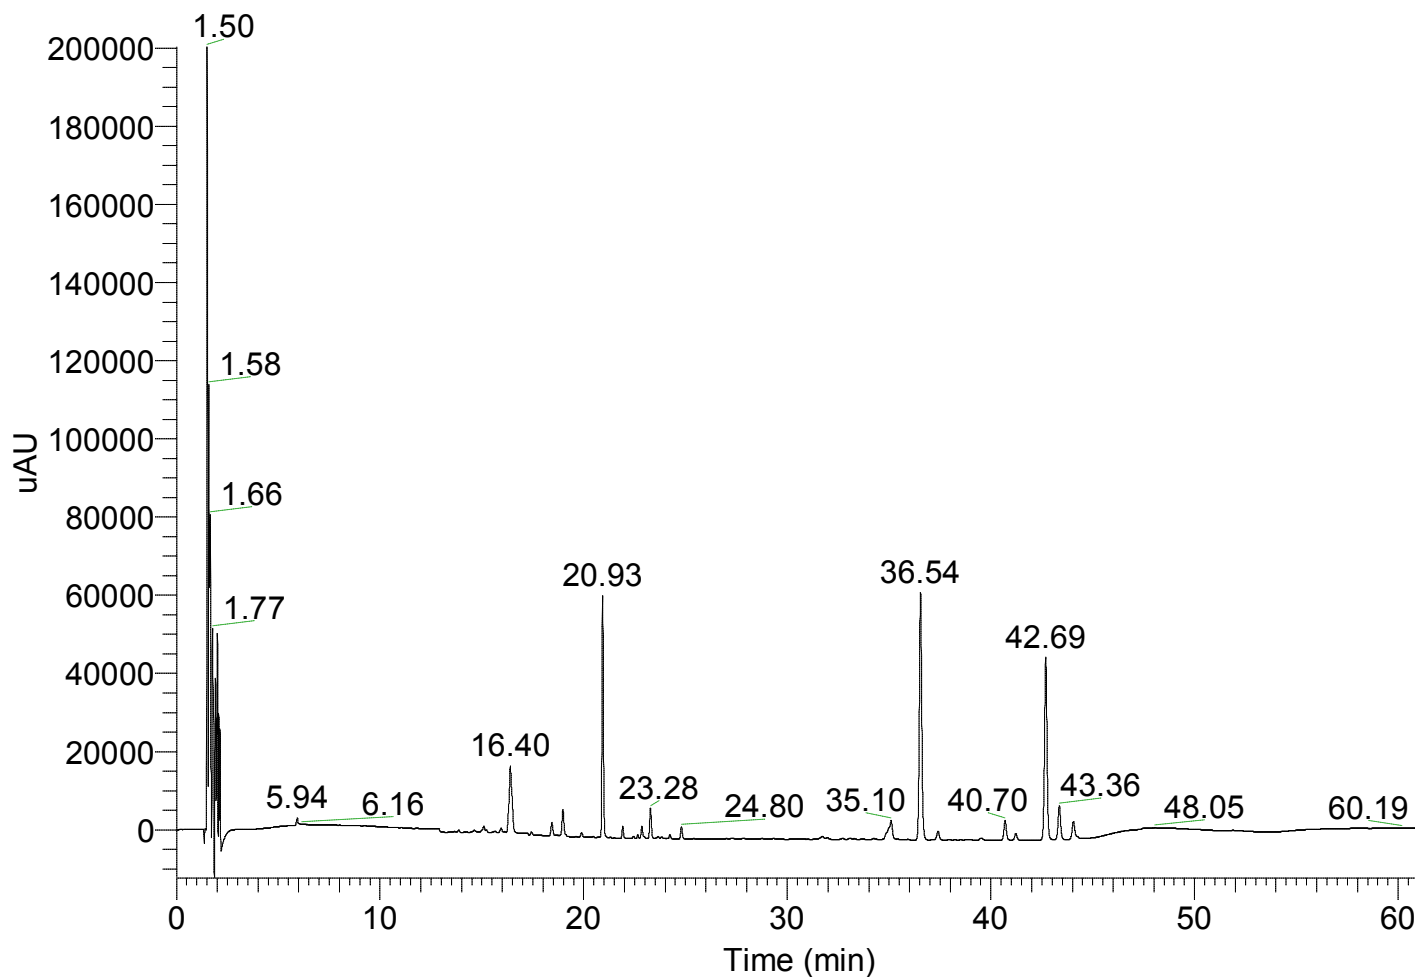

NL:  
2.00E5  
Total Scan  
PDA 68

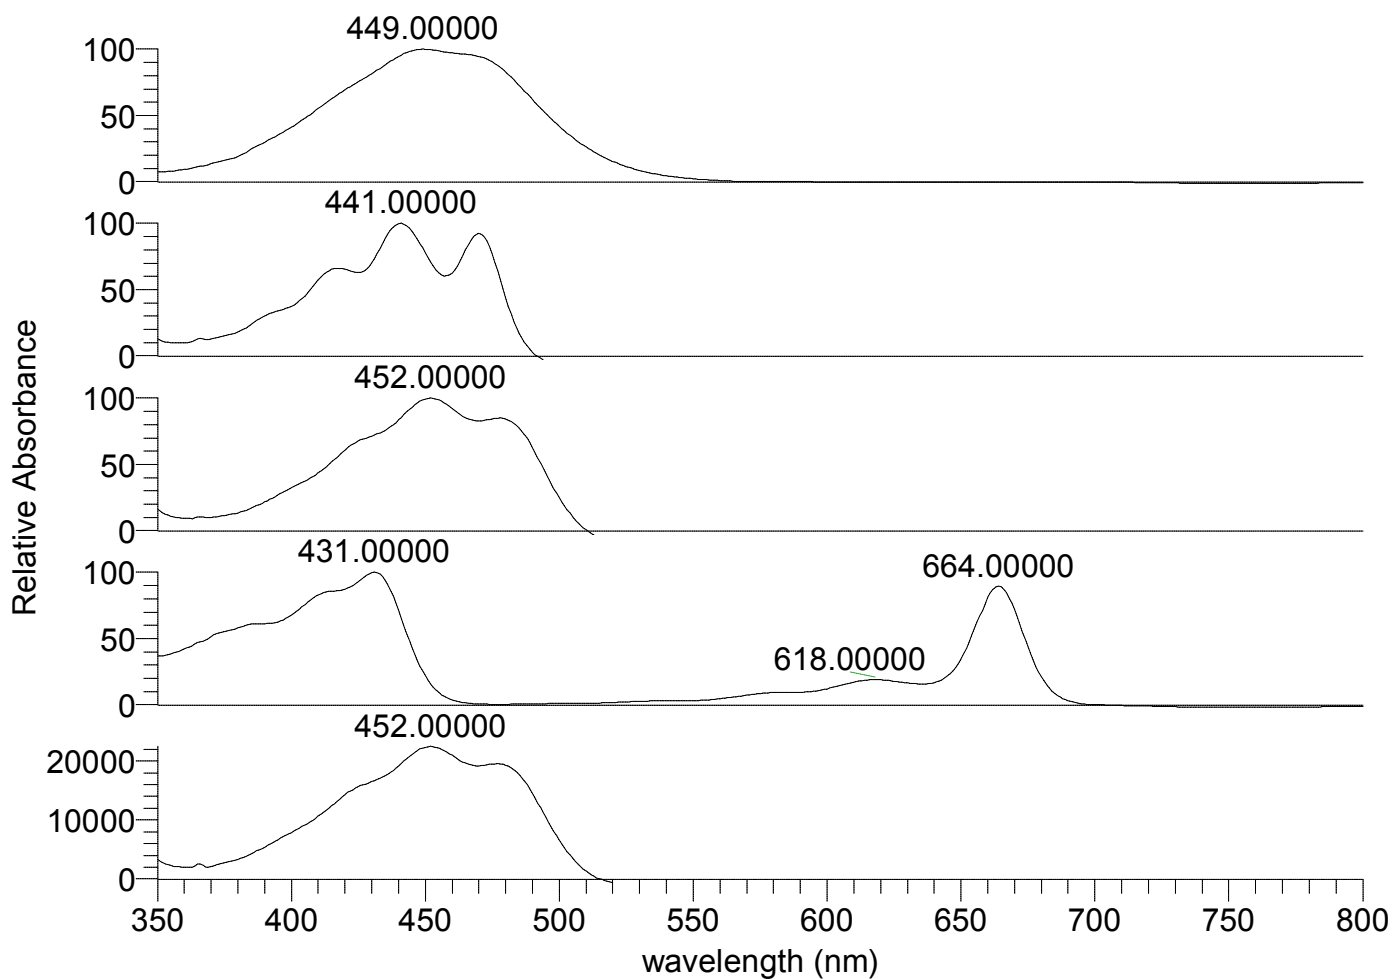

NL:  
2.89E5  
68#6279 RT:  
20.93 AV: 1

NL:  
1.82E4  
68#6573 RT:  
21.91 AV: 1

NL:  
1.52E4  
68#7440 RT:  
24.80 AV: 1

NL:  
2.77E5  
68#10962  
RT: 36.54  
AV: 1

NL:  
2.24E4  
68#13218  
RT: 44.06  
AV: 1

Supplement: Data_Sheet_1.zip [file Muestra68_HPLC-UV.pdf › Carotenoids/Muestra68_HPLC-UV.pdf]

RT: 0.00 - 61.20

NL:  
1.97E5  
Total Scan  
PDA 69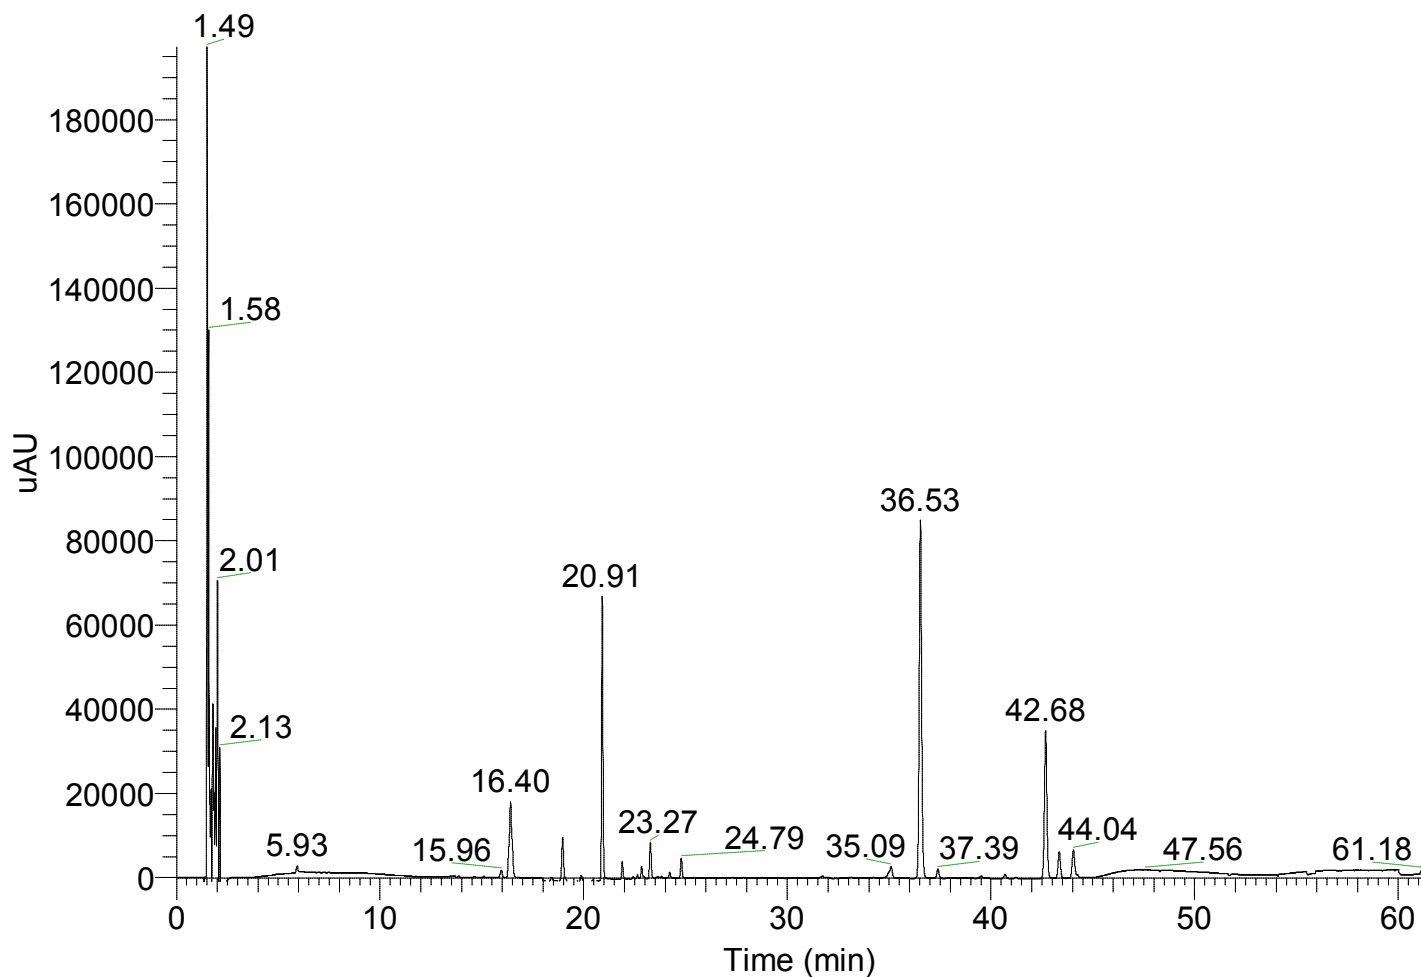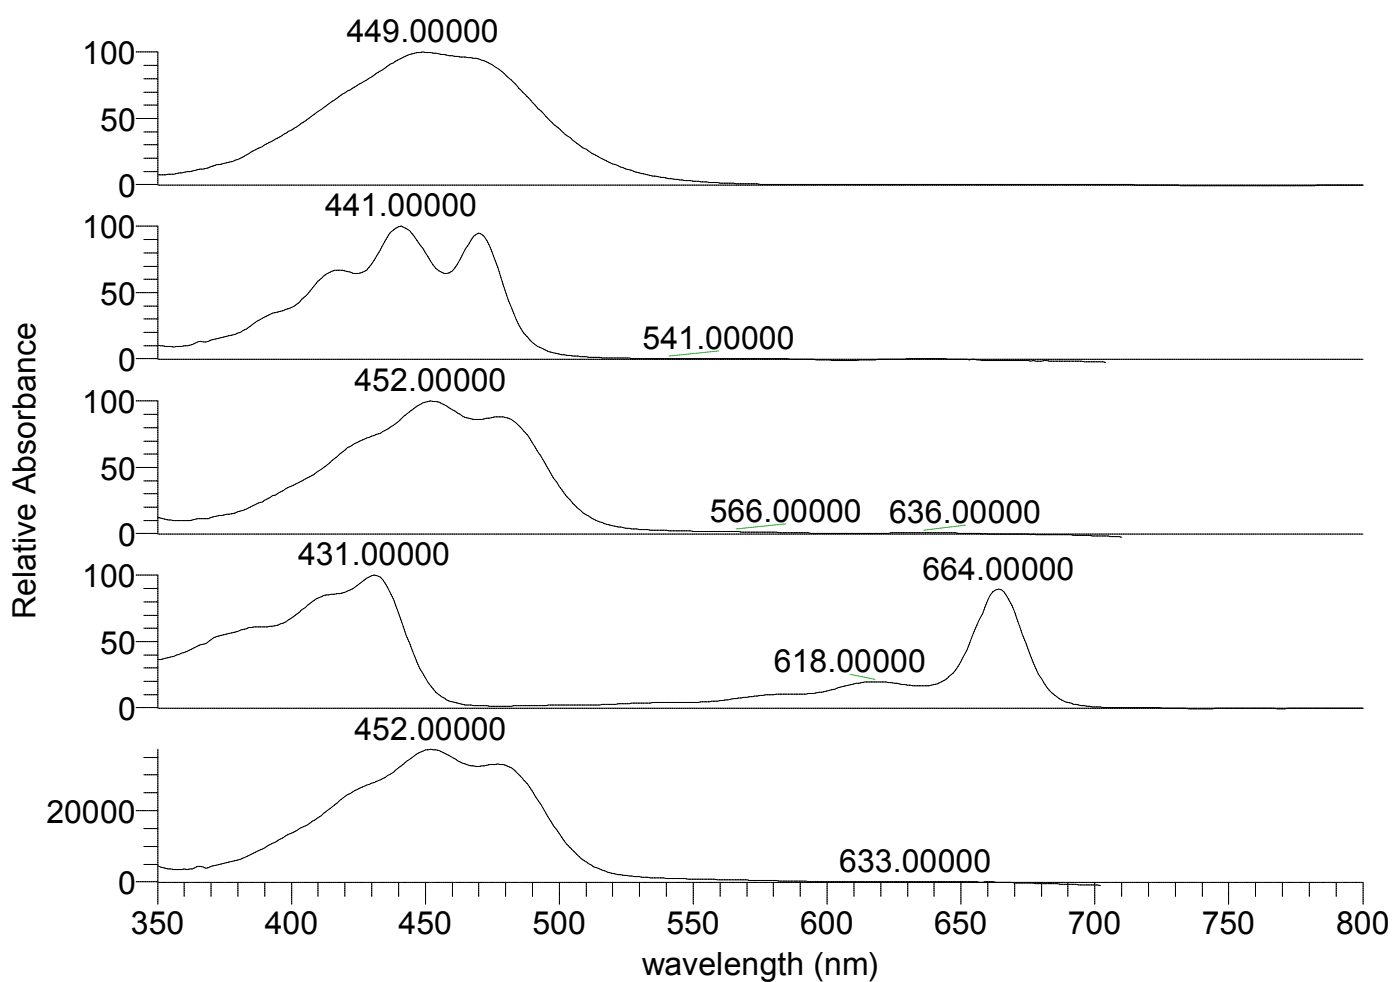NL:  
3.13E5  
69#6273 RT:  
20.91 AV: 1NL:  
2.77E4  
69#6567 RT:  
21.89 AV: 1NL:  
2.70E4  
69#7436 RT:  
24.79 AV: 1NL:  
3.75E5  
69#10959  
RT: 36.53  
AV: 1NL:  
3.72E4  
69#13213  
RT: 44.04  
AV: 1

Supplement: Data_Sheet_1.zip [file Muestra69_HPLC-UV.pdf › Carotenoids/Muestra69_HPLC-UV.pdf]

RT: 0.00 - 61.20

NL:  
1.96E5  
Total Scan  
PDA 70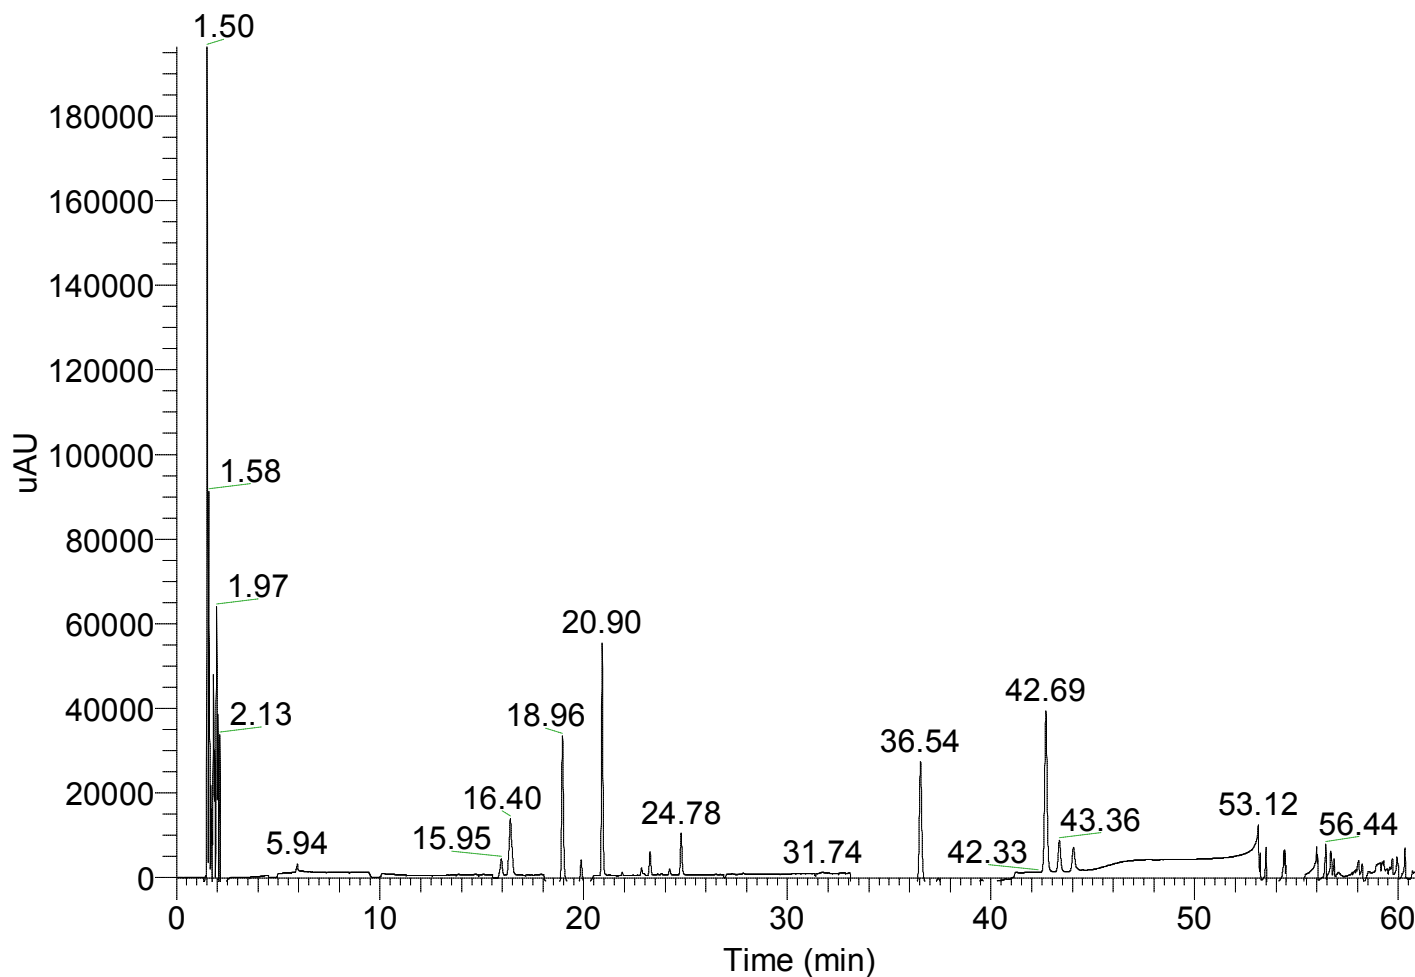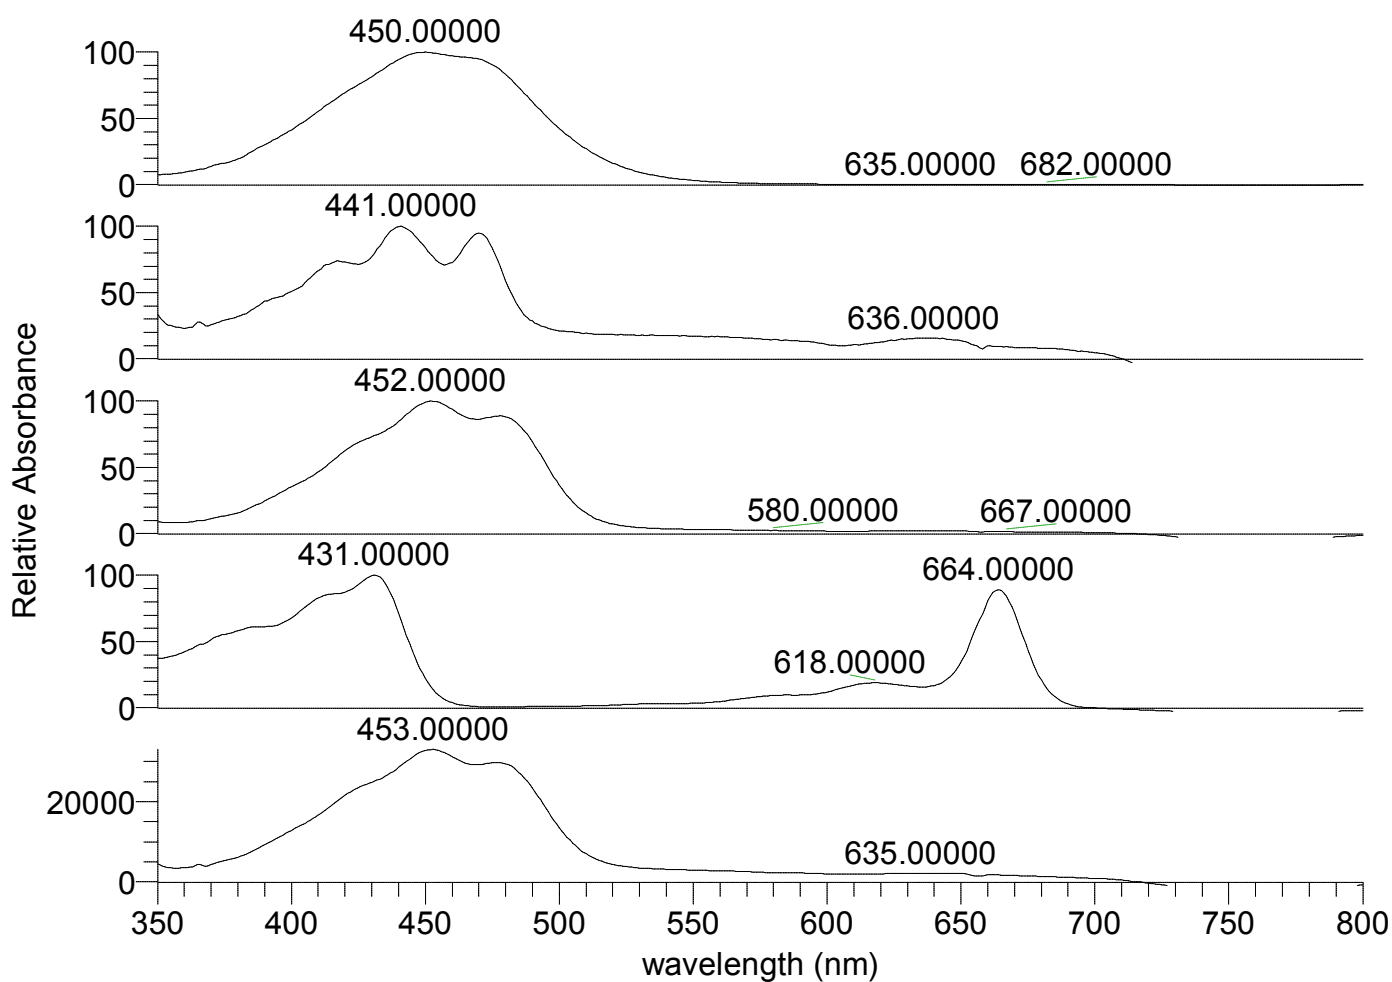NL:  
2.58E5  
70#6270 RT:  
20.90 AV: 1NL:  
6.43E3  
70#6566 RT:  
21.89 AV: 1NL:  
5.41E4  
70#7435 RT:  
24.78 AV: 1NL:  
1.26E5  
70#10963  
RT: 36.54  
AV: 1NL:  
3.30E4  
70#13216  
RT: 44.05  
AV: 1

Supplement: Data_Sheet_1.zip [file Muestra70_HPLC-UV.pdf › Carotenoids/Muestra70_HPLC-UV.pdf]

RT: 0.00 - 61.20

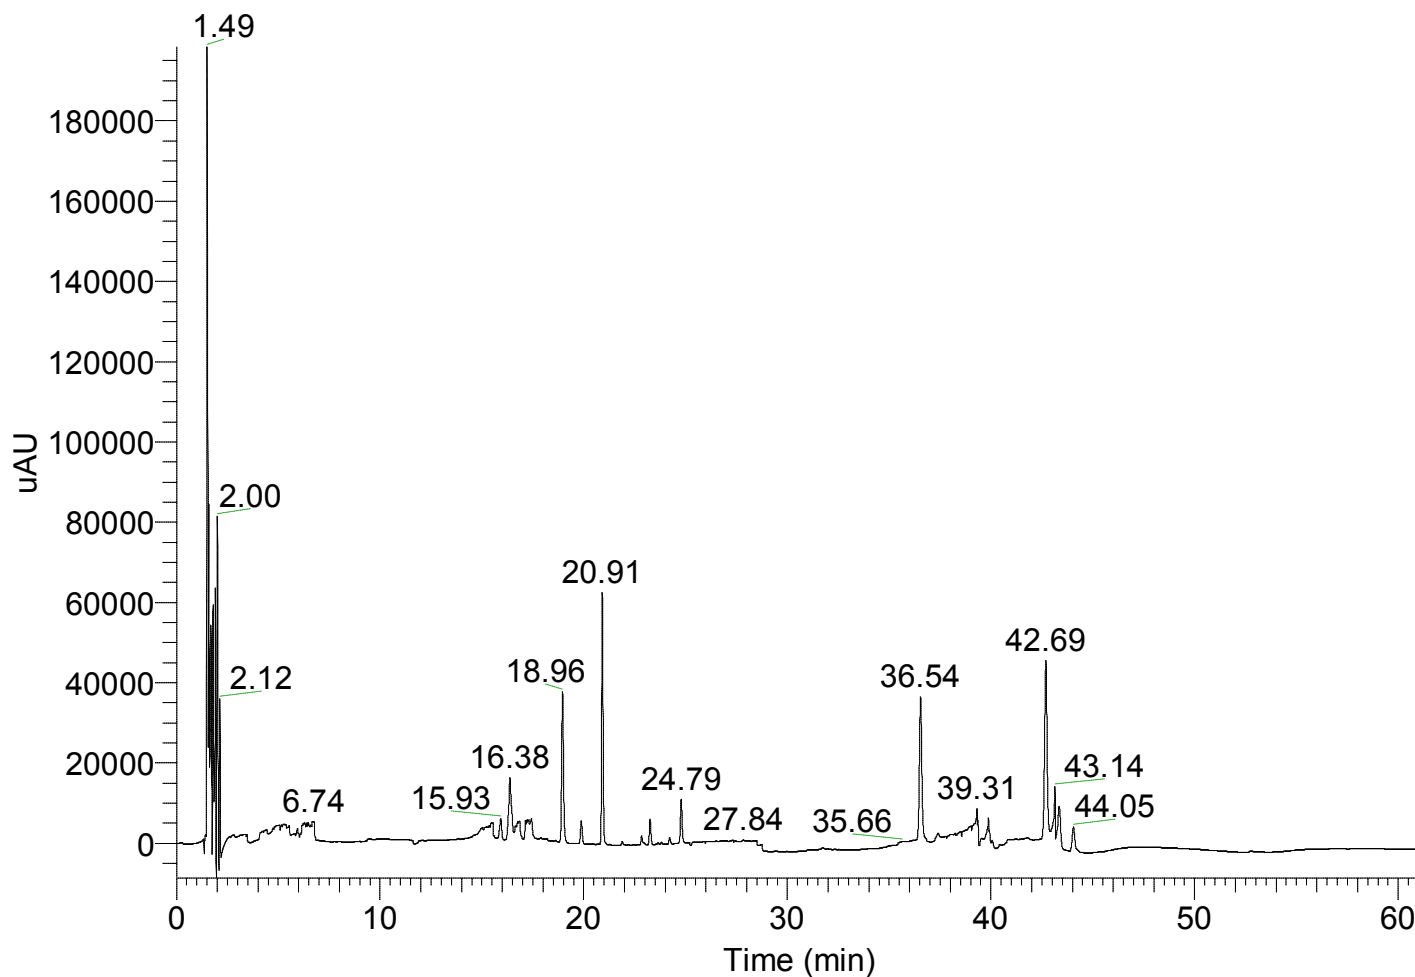

NL:  
1.98E5  
Total Scan  
PDA 71

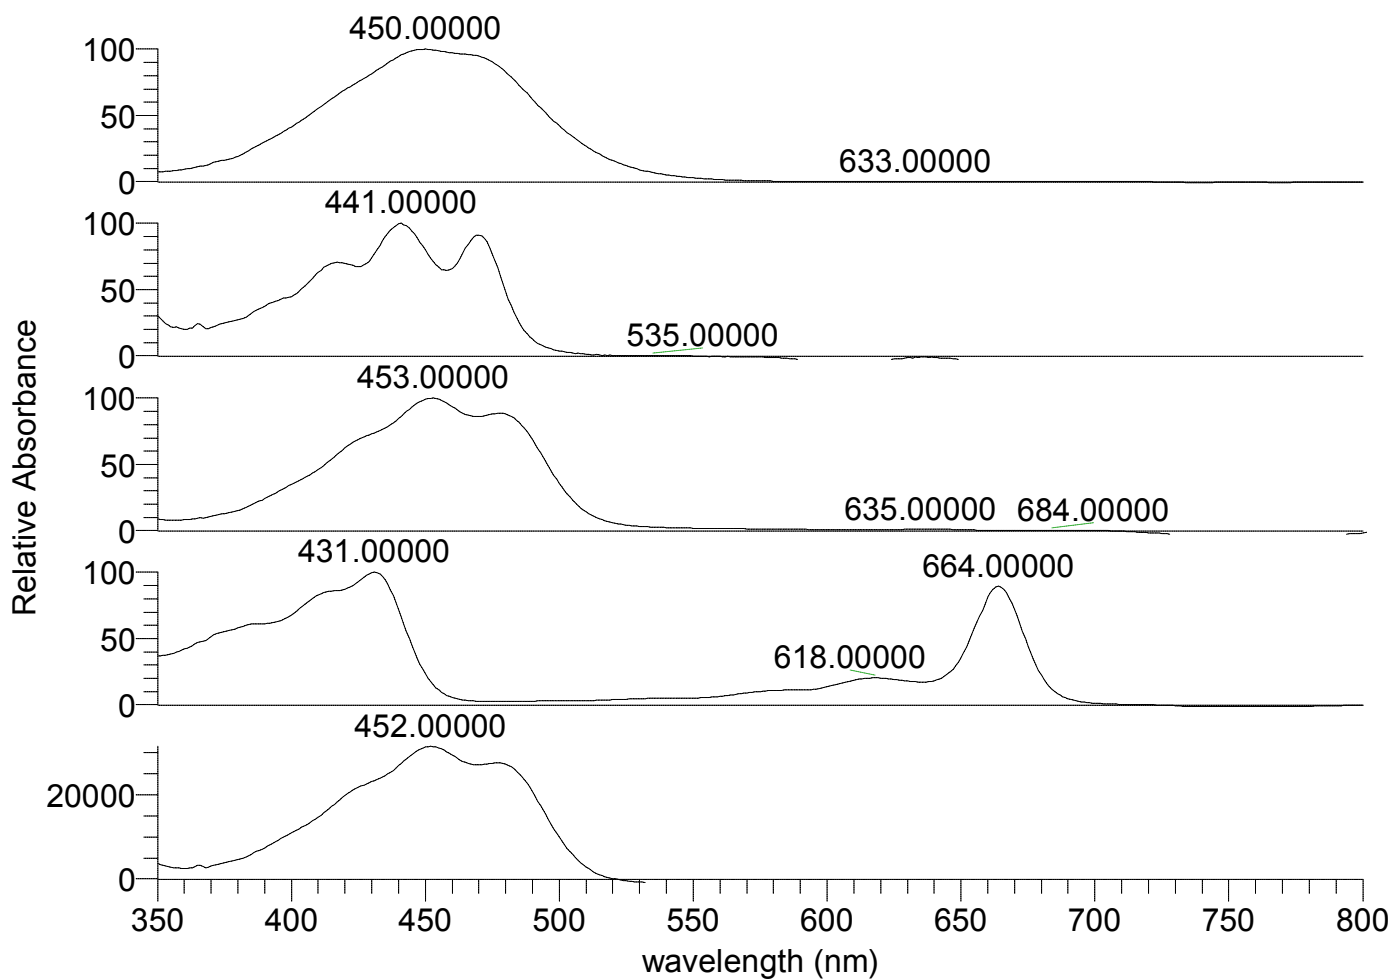

NL:  
2.95E5  
71#6273 RT:  
20.91 AV: 1

NL:  
6.71E3  
71#6568 RT:  
21.89 AV: 1

NL:  
5.93E4  
71#7436 RT:  
24.79 AV: 1

NL:  
1.58E5  
71#10962  
RT: 36.54  
AV: 1

NL:  
3.15E4  
71#13217  
RT: 44.06  
AV: 1

Supplement: Data_Sheet_1.zip [file Muestra71_HPLC-UV.pdf › Carotenoids/Muestra71_HPLC-UV.pdf]

RT: 0.00 - 61.20

NL:  
2.00E5  
Total Scan  
PDA 72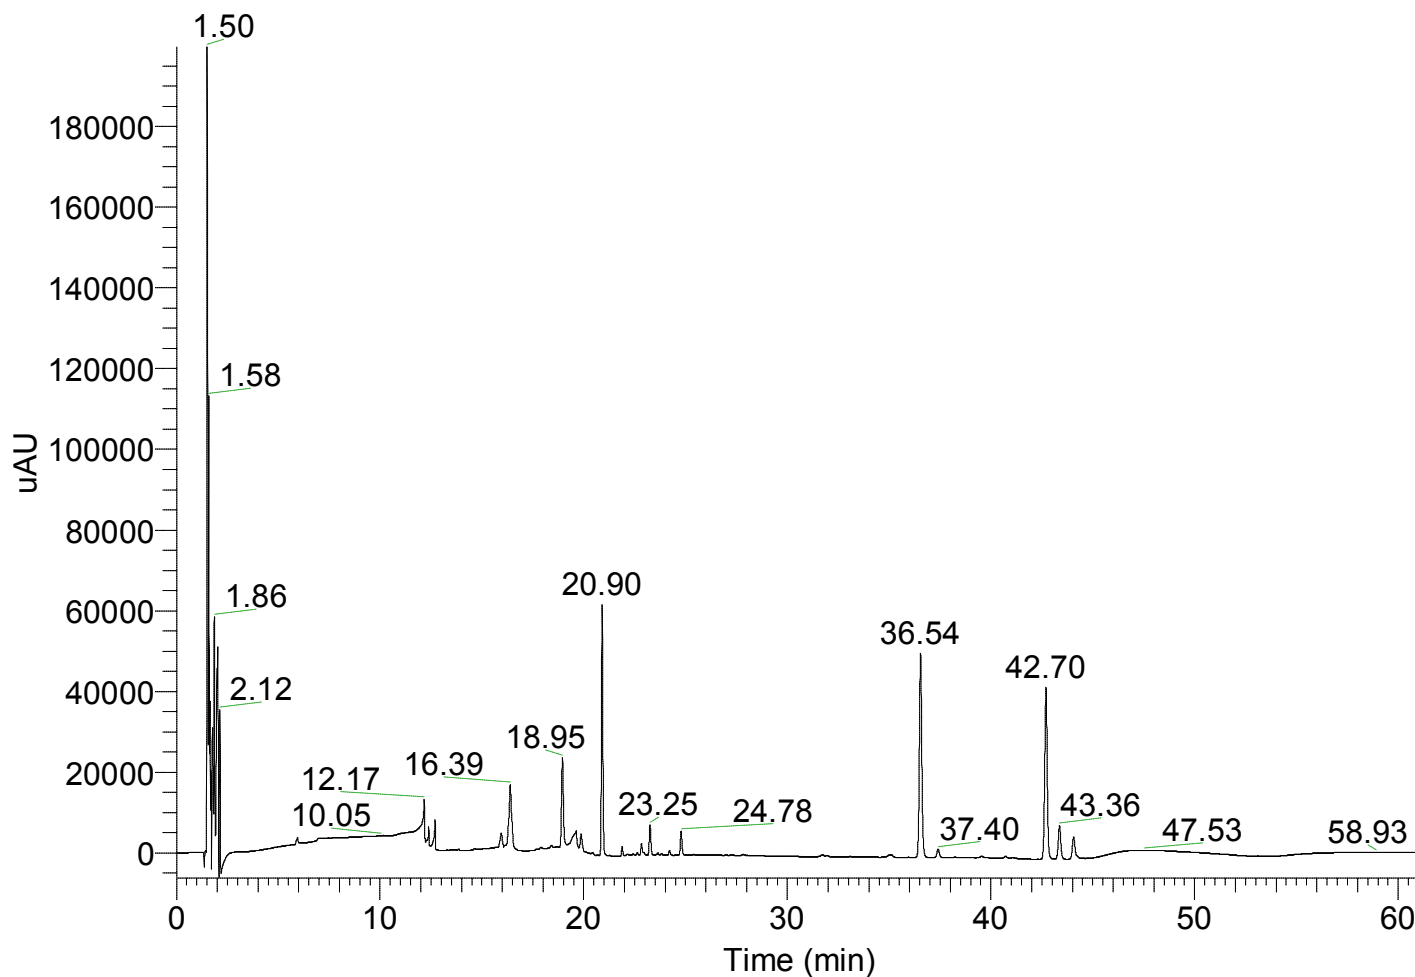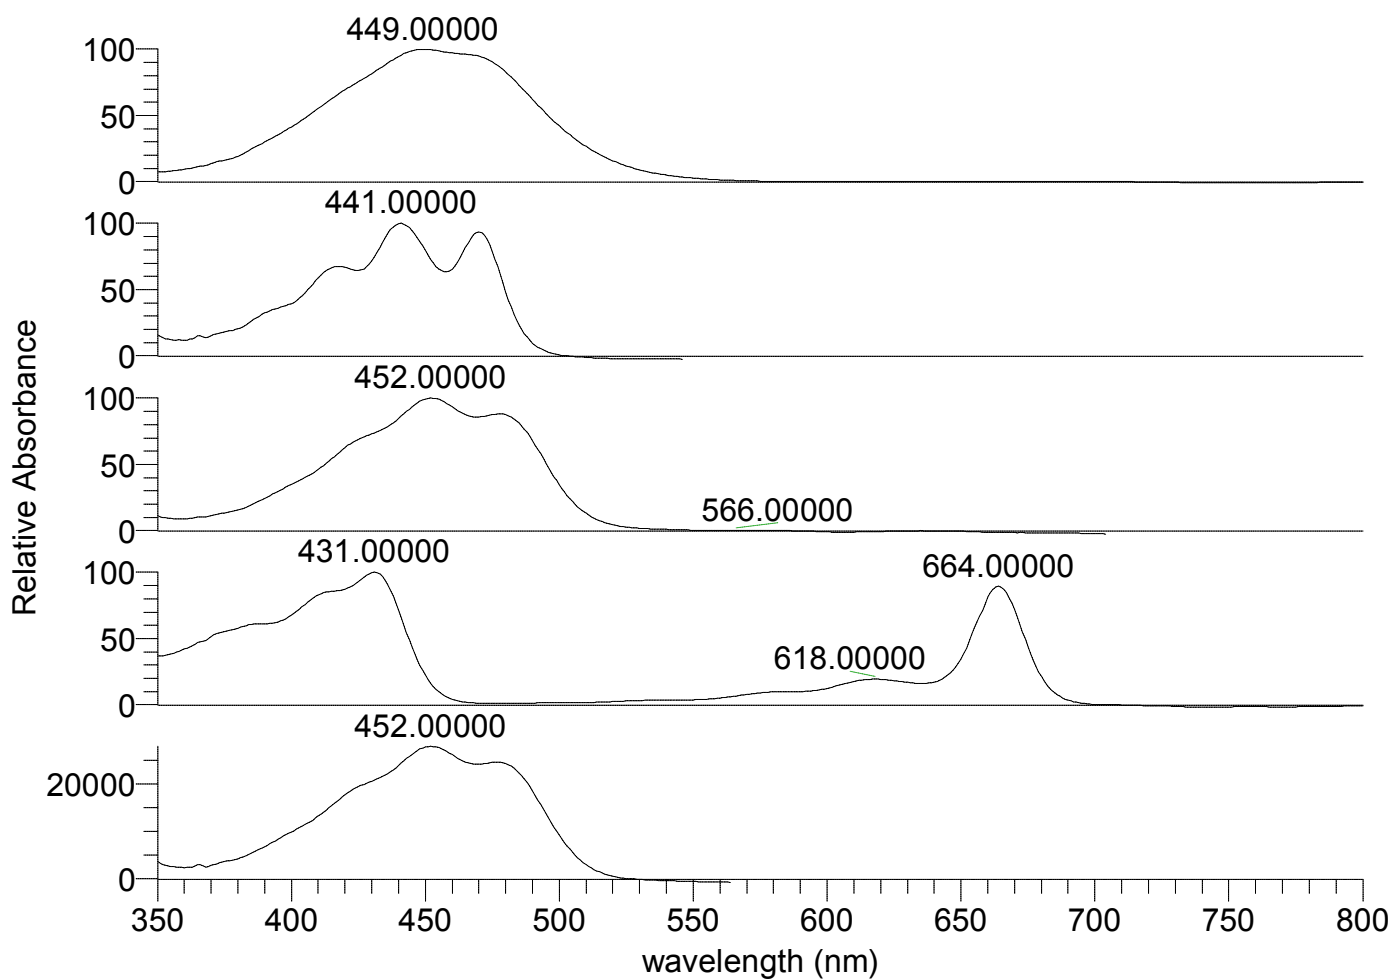NL:  
2.93E5  
72#6270 RT:  
20.90 AV: 1NL:  
1.45E4  
72#6564 RT:  
21.88 AV: 1NL:  
3.21E4  
72#7435 RT:  
24.78 AV: 1NL:  
2.22E5  
72#10962  
RT: 36.54  
AV: 1NL:  
2.79E4  
72#13220  
RT: 44.07  
AV: 1

Supplement: Data_Sheet_1.zip [file Muestra72_HPLC-UV.pdf › Carotenoids/Muestra72_HPLC-UV.pdf]

RT: 0.00 - 61.20

NL:  
1.95E5  
Total Scan  
PDA 73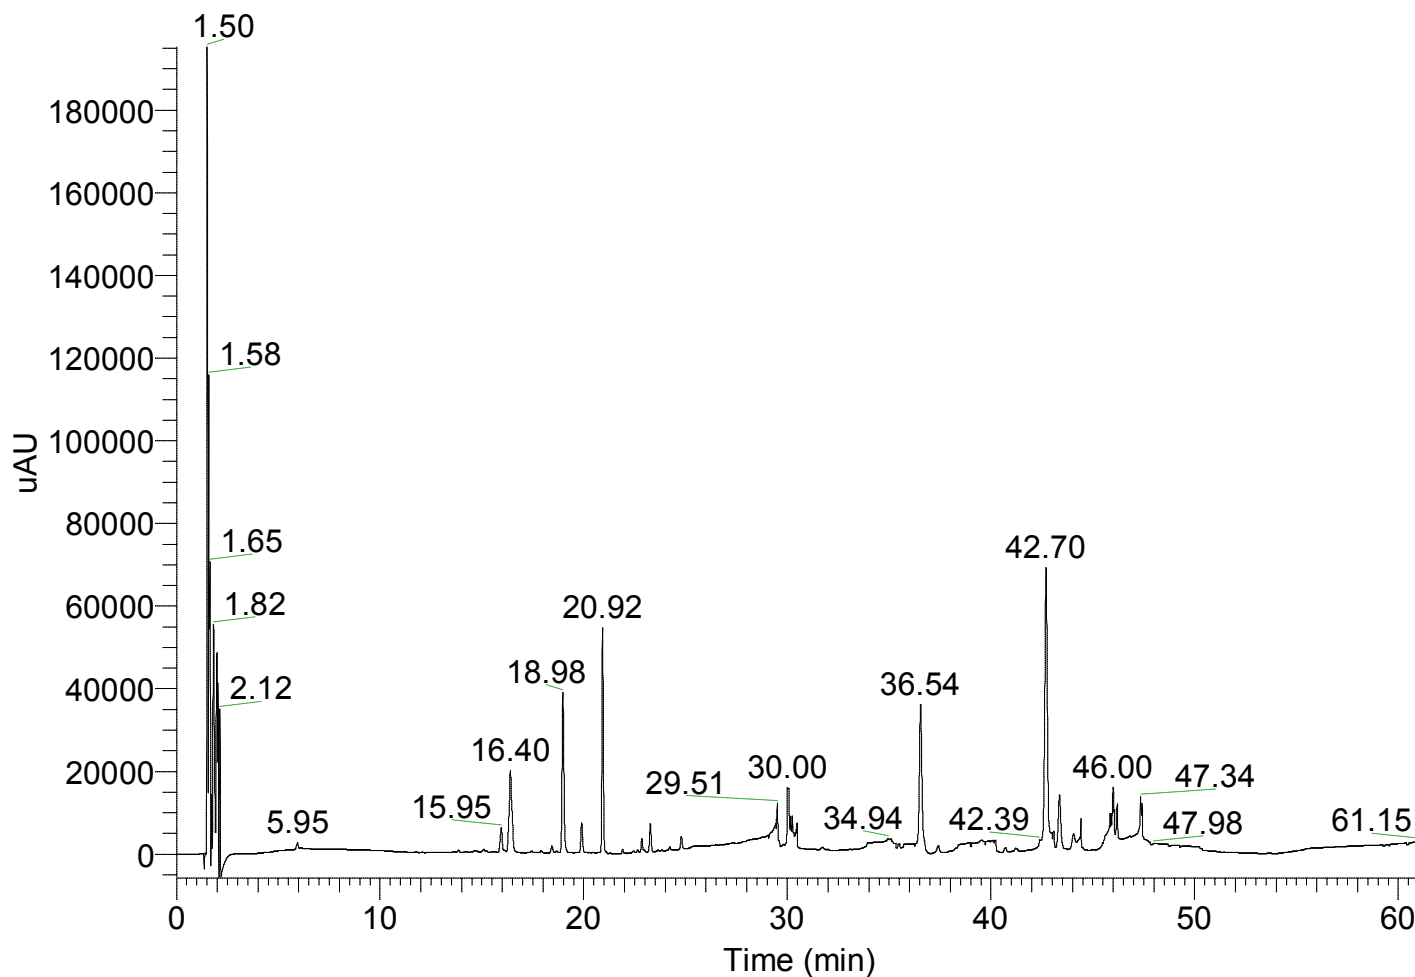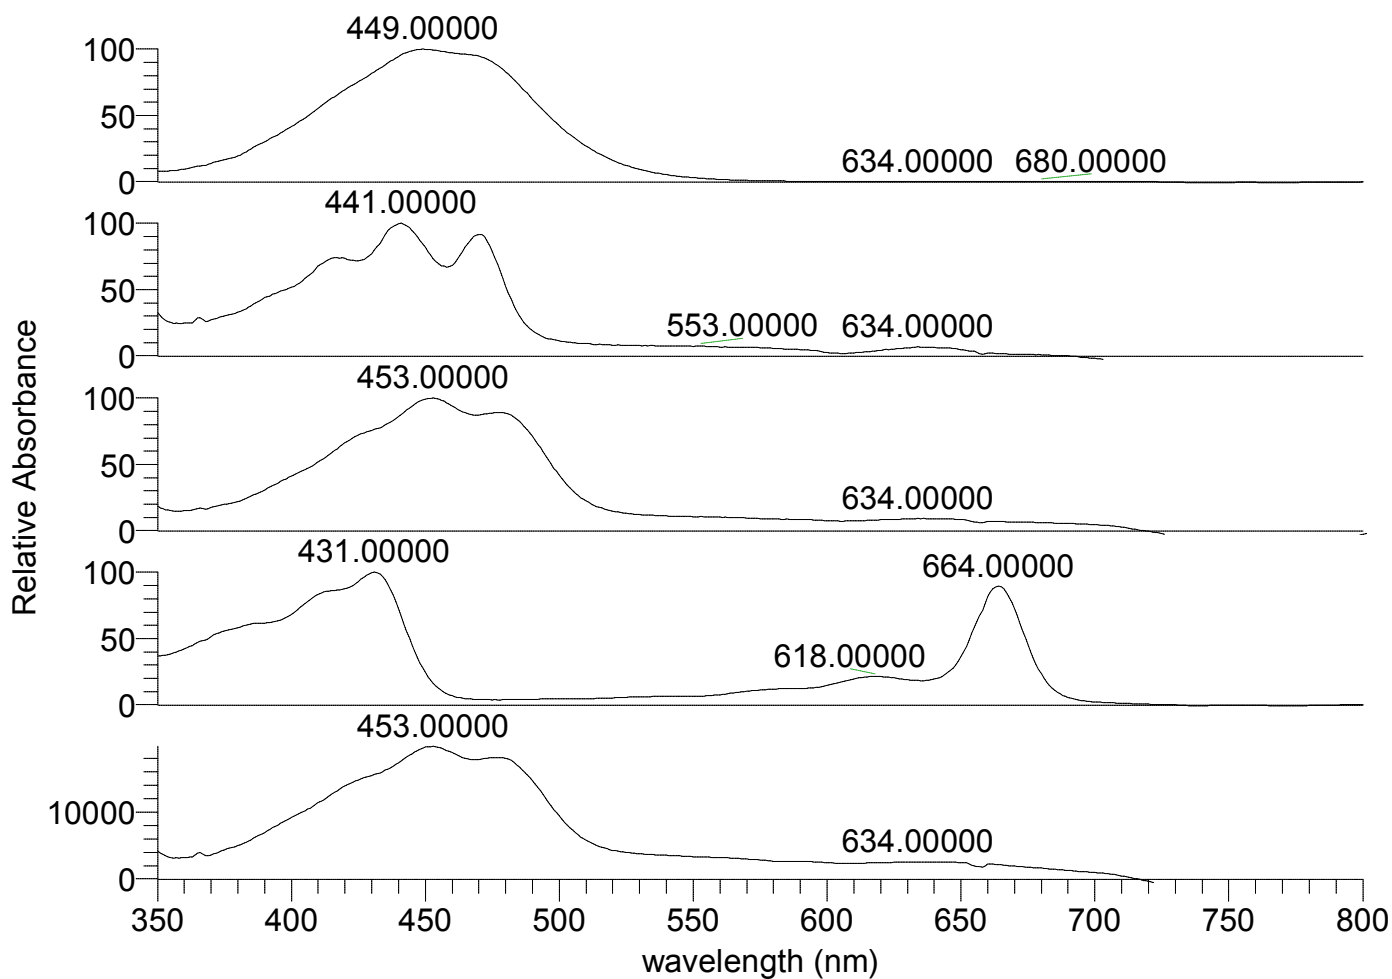NL:  
2.58E5  
73#6277 RT:  
20.92 AV: 1NL:  
7.86E3  
73#6571 RT:  
21.90 AV: 1NL:  
1.90E4  
73#7439 RT:  
24.80 AV: 1NL:  
1.52E5  
73#10962  
RT: 36.54  
AV: 1NL:  
1.97E4  
73#13216  
RT: 44.05  
AV: 1

Supplement: Data_Sheet_1.zip [file Muestra73_HPLC-UV.pdf › Carotenoids/Muestra73_HPLC-UV.pdf]

RT: 0.00 - 61.20

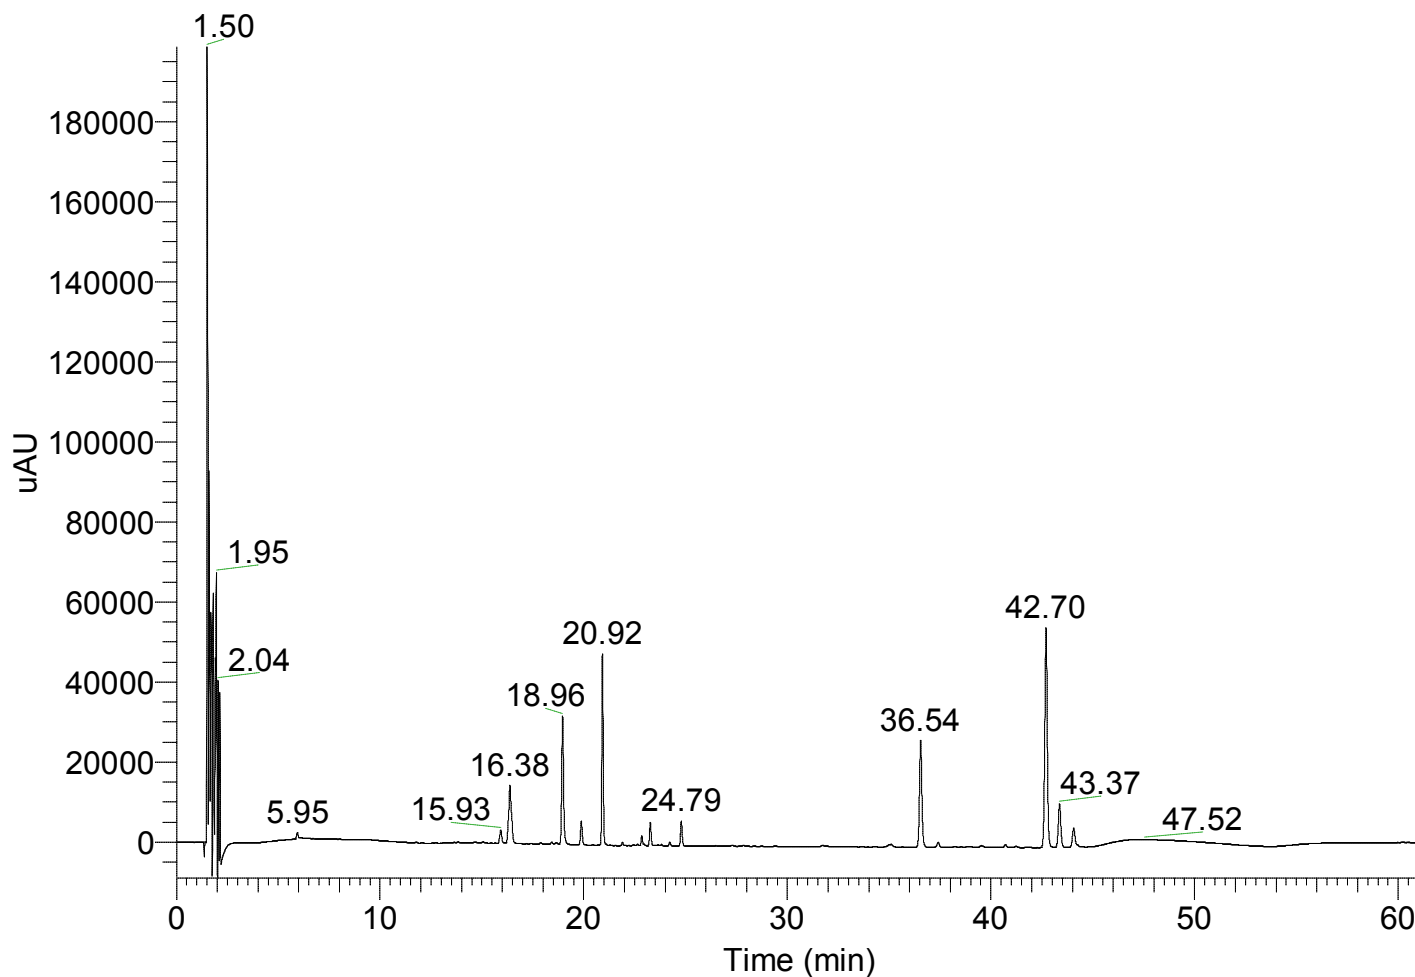

NL:  
1.99E5  
Total Scan  
PDA 74

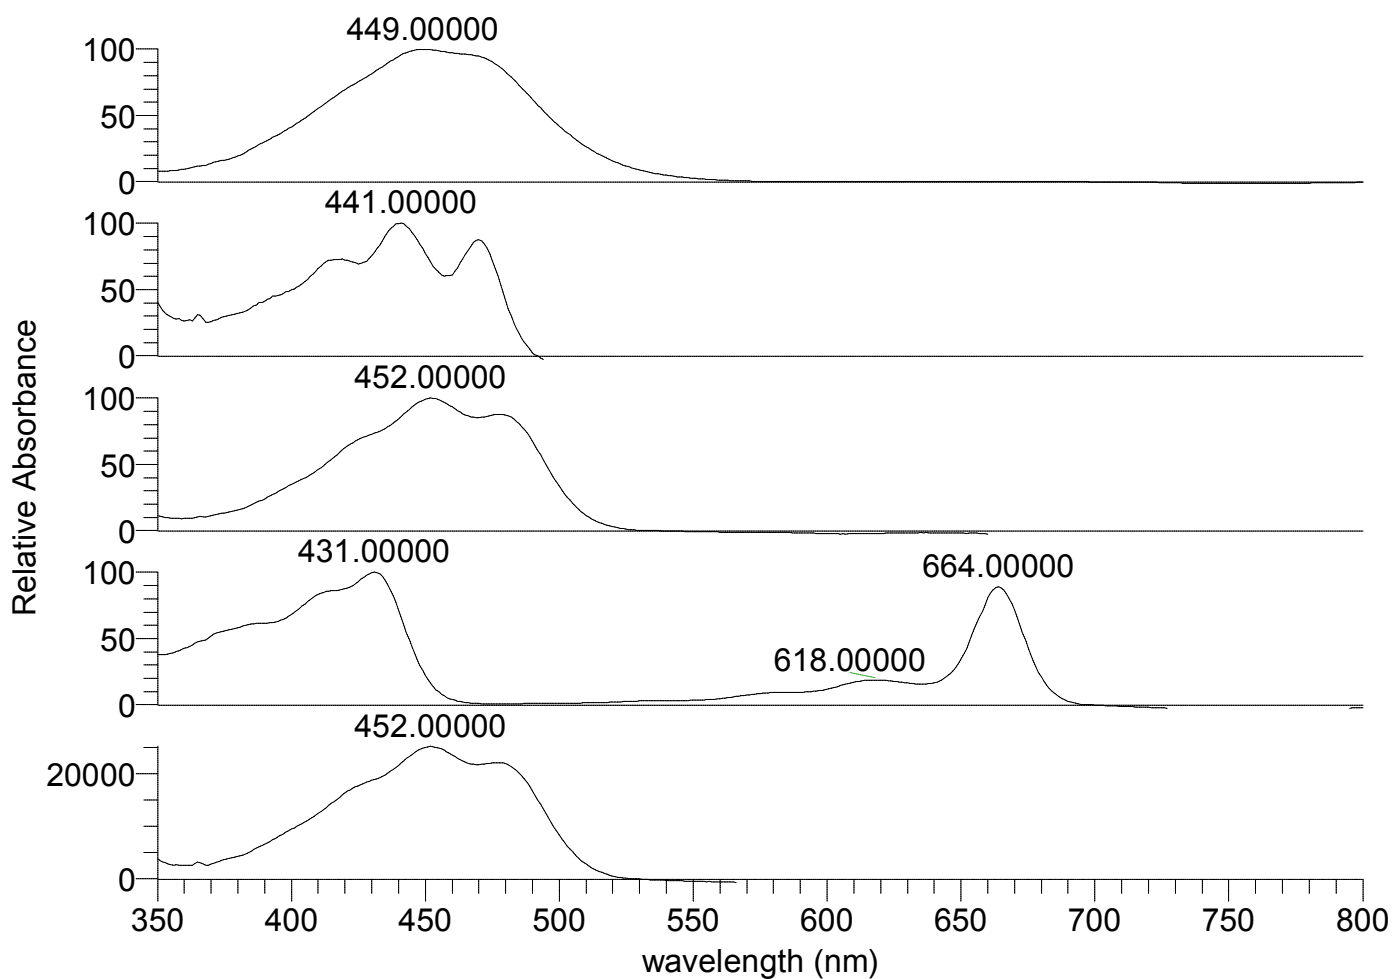

NL:  
2.25E5  
74#6276 RT:  
20.92 AV: 1

NL:  
5.54E3  
74#6572 RT:  
21.91 AV: 1

NL:  
3.31E4  
74#7436 RT:  
24.79 AV: 1

NL:  
1.16E5  
74#10962  
RT: 36.54  
AV: 1

NL:  
2.52E4  
74#13216  
RT: 44.05  
AV: 1

Supplement: Data_Sheet_1.zip [file Muestra74_HPLC-UV.pdf › Carotenoids/Muestra74_HPLC-UV.pdf]

RT: 0.00 - 61.20

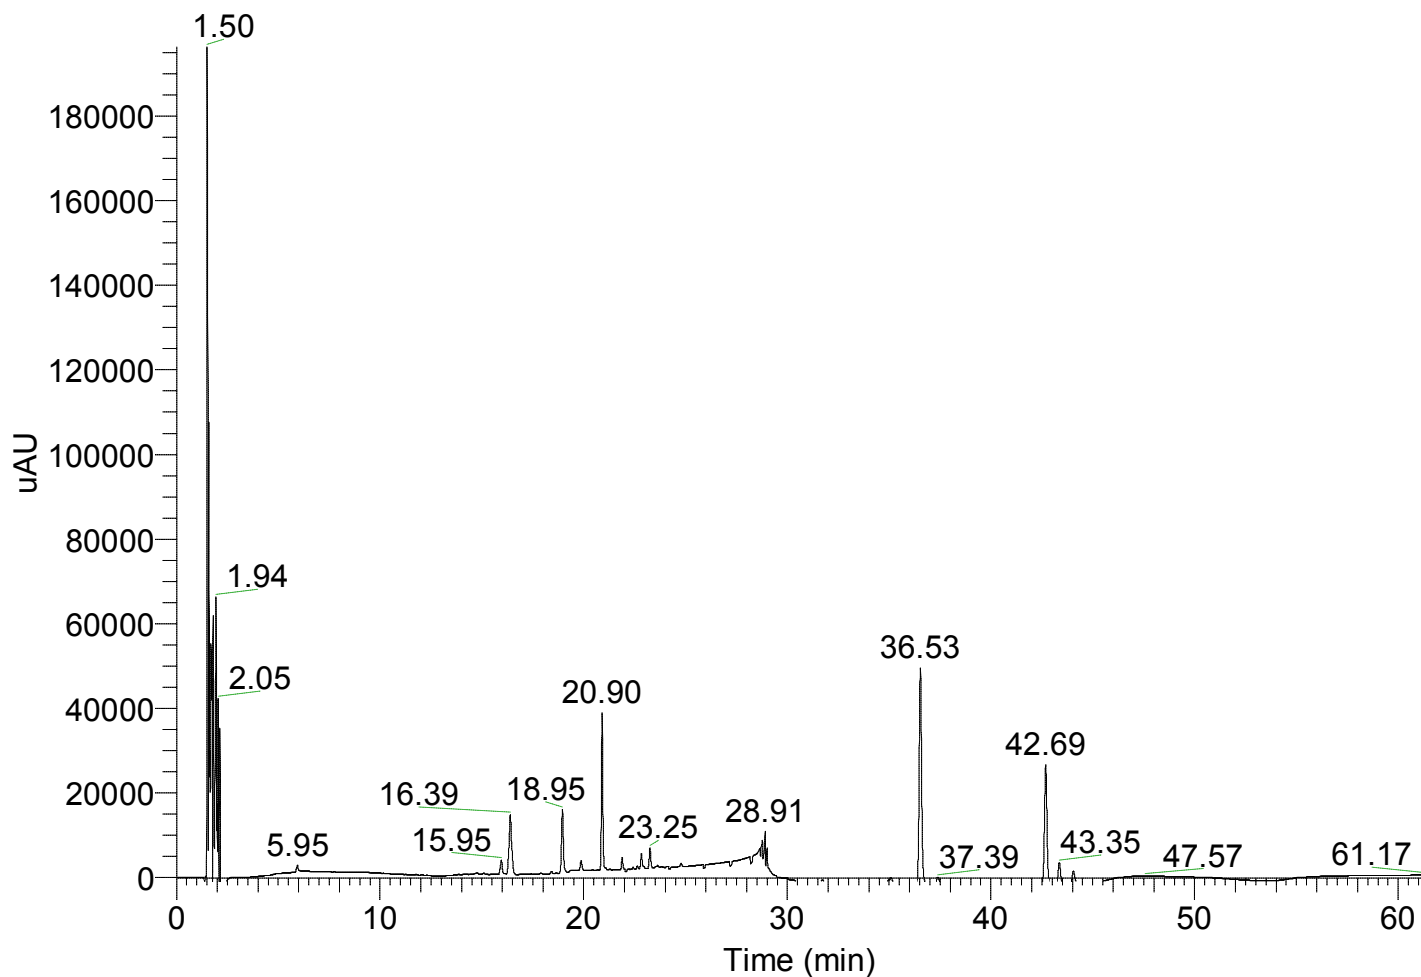

NL:  
1.96E5  
Total Scan  
PDA 75

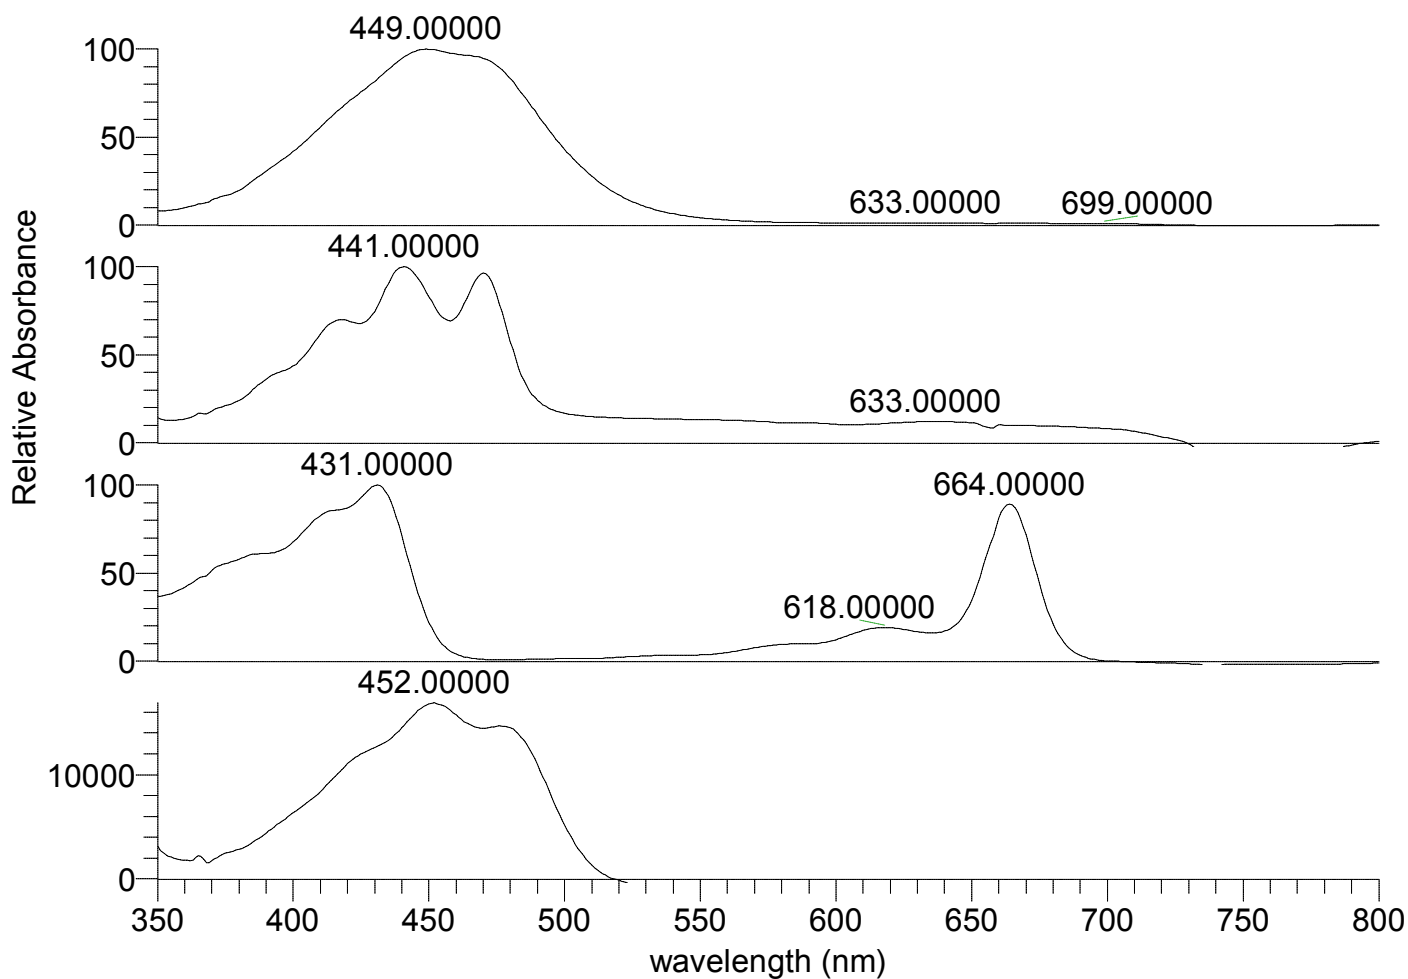

NL:  
1.77E5  
75#6269  
RT: 20.90  
AV: 1

NL:  
2.14E4  
75#6565  
RT: 21.88  
AV: 1

NL:  
2.24E5  
75#10959  
RT: 36.53  
AV: 1

NL:  
1.69E4  
75#13212  
RT: 44.04  
AV: 1

Supplement: Data_Sheet_1.zip [file Muestra75_HPLC-UV.pdf › Carotenoids/Muestra75_HPLC-UV.pdf]

RT: 0.00 - 61.20

NL:  
1.94E5  
Total Scan  
PDA 79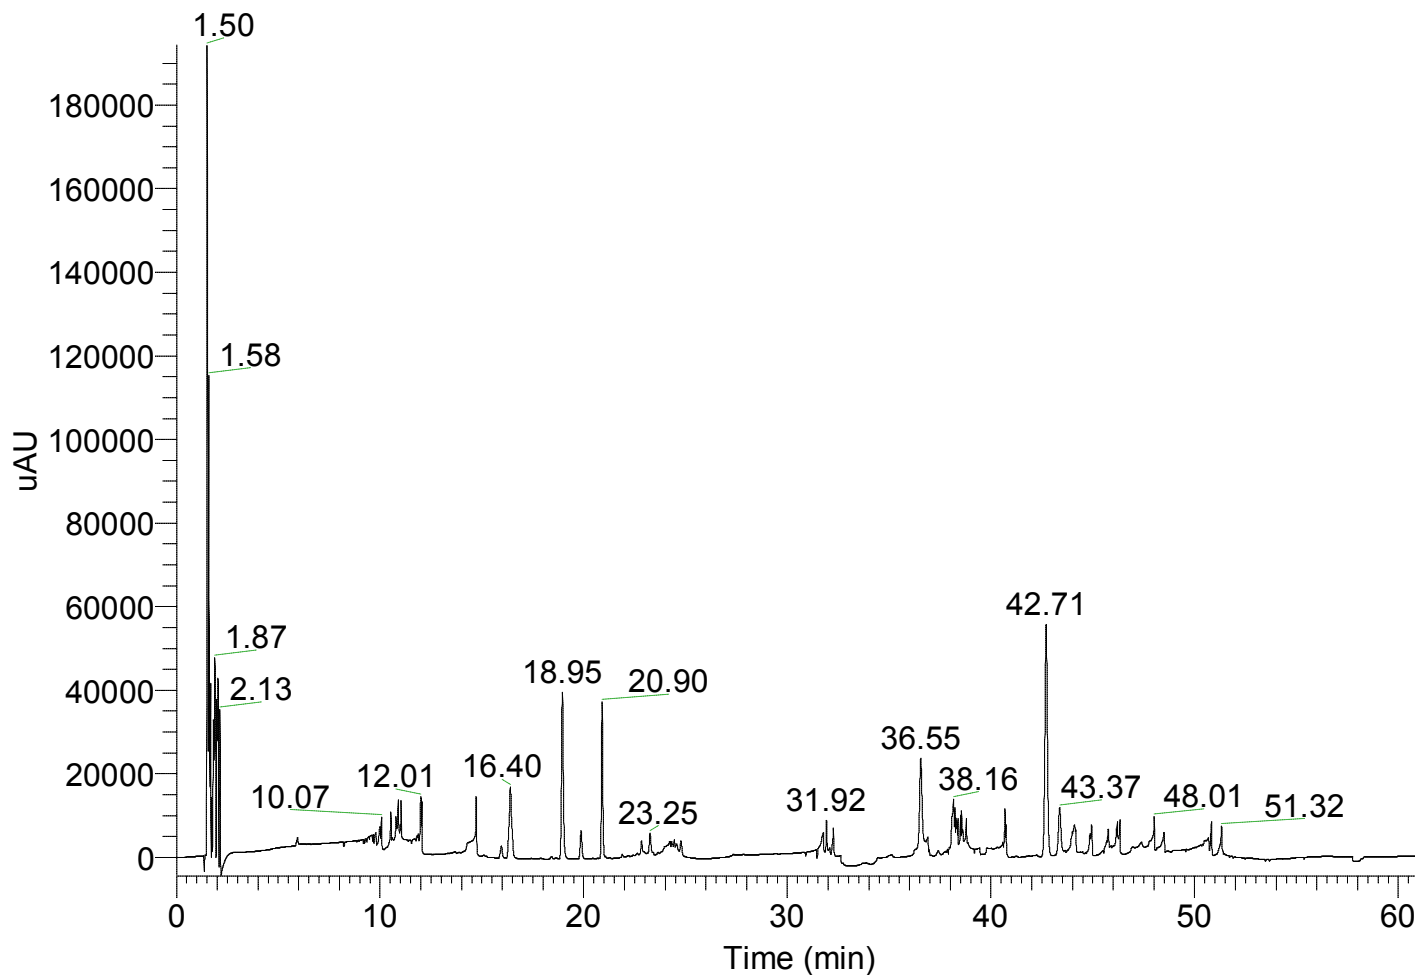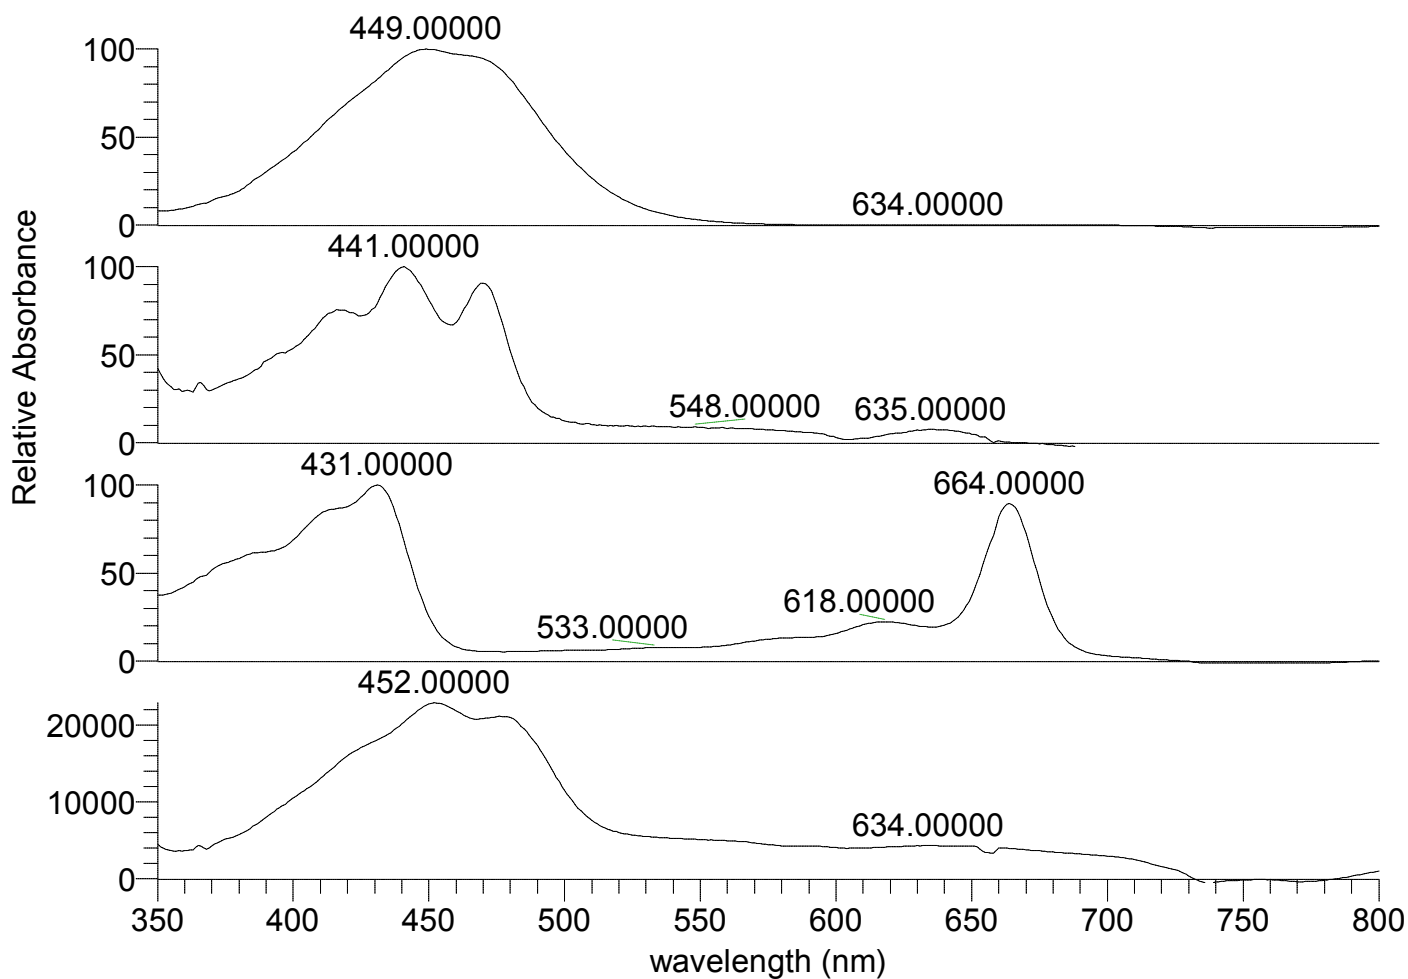

Supplement: Data_Sheet_1.zip [file Muestra79_HPLC-UV.pdf › Carotenoids/Muestra79_HPLC-UV.pdf]

RT: 0.00 - 61.20

NL:  
2.11E5  
Total Scan  
PDA 7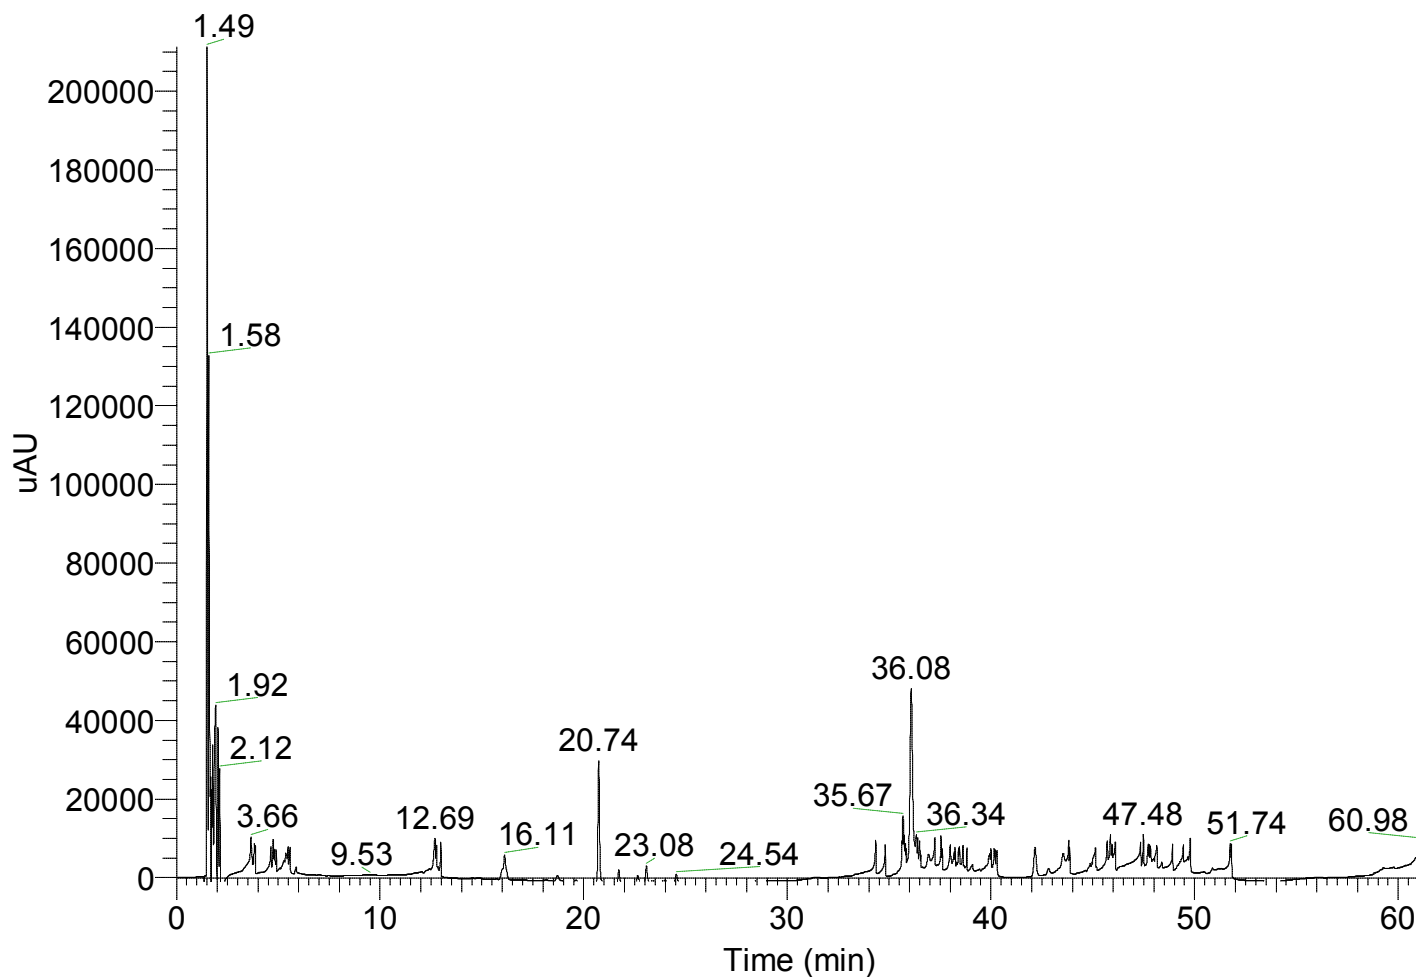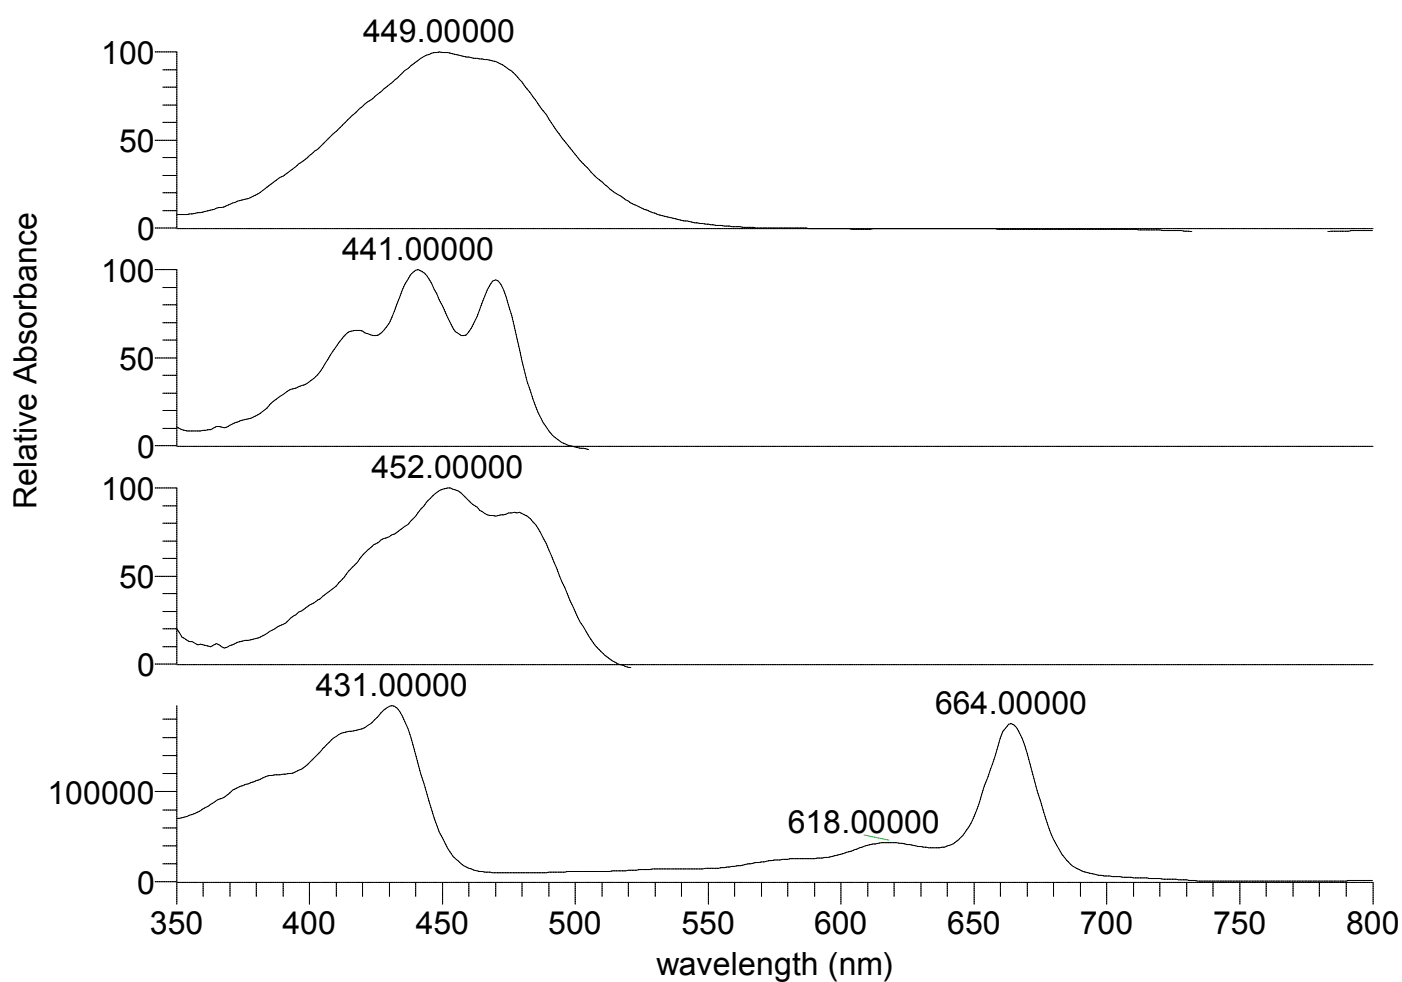

Supplement: Data_Sheet_1.zip [file Muestra7_HPLC-UV.pdf › Carotenoids/Muestra7_HPLC-UV.pdf]

RT: 0.00 - 61.20

NL:  
1.98E5  
Total Scan  
PDA 80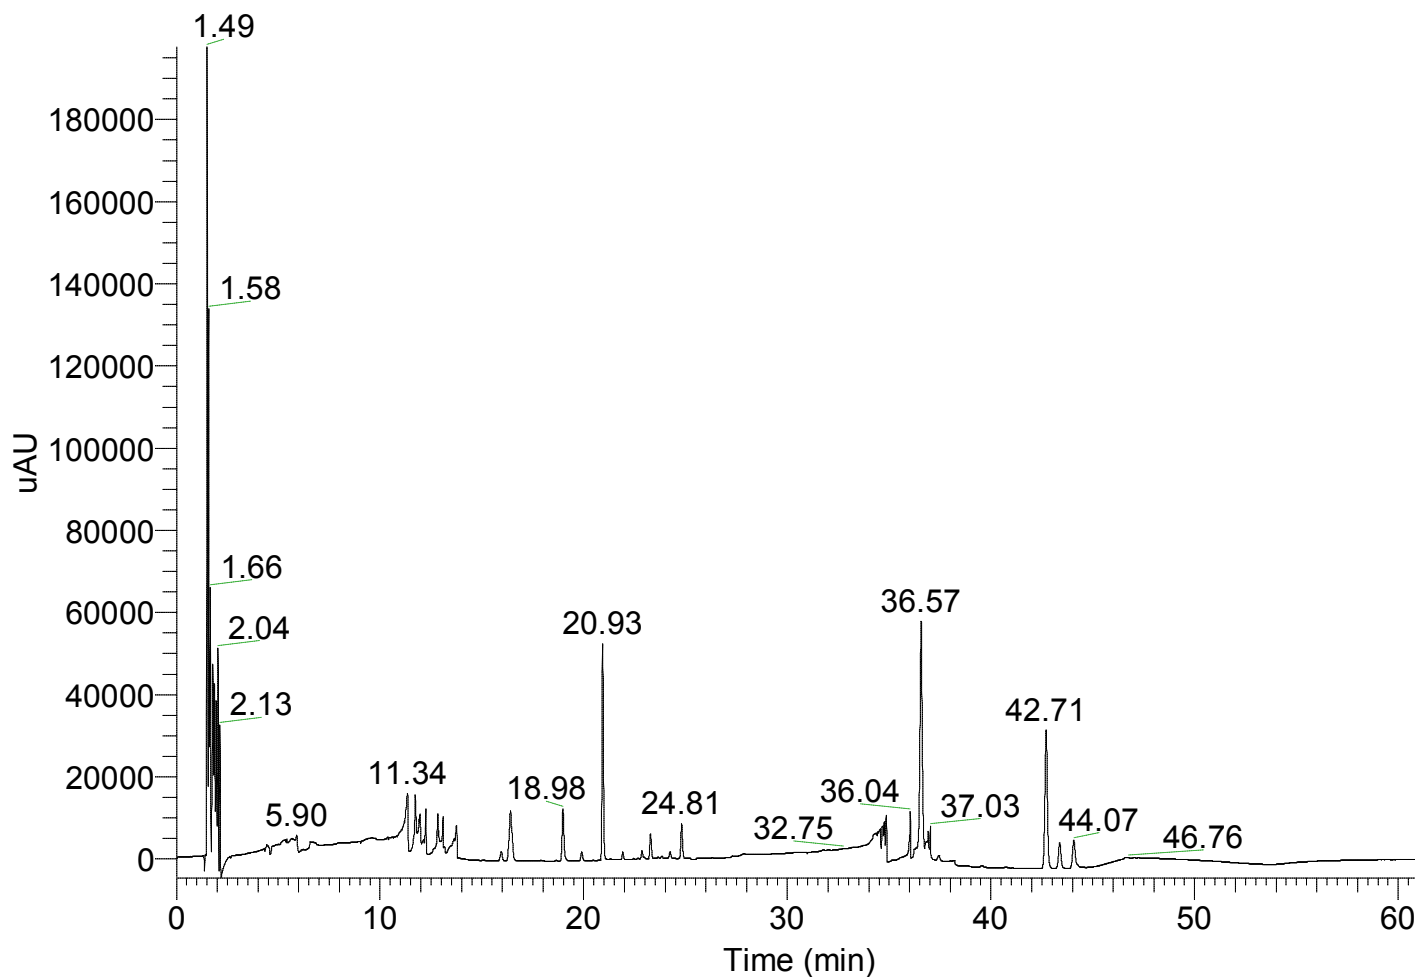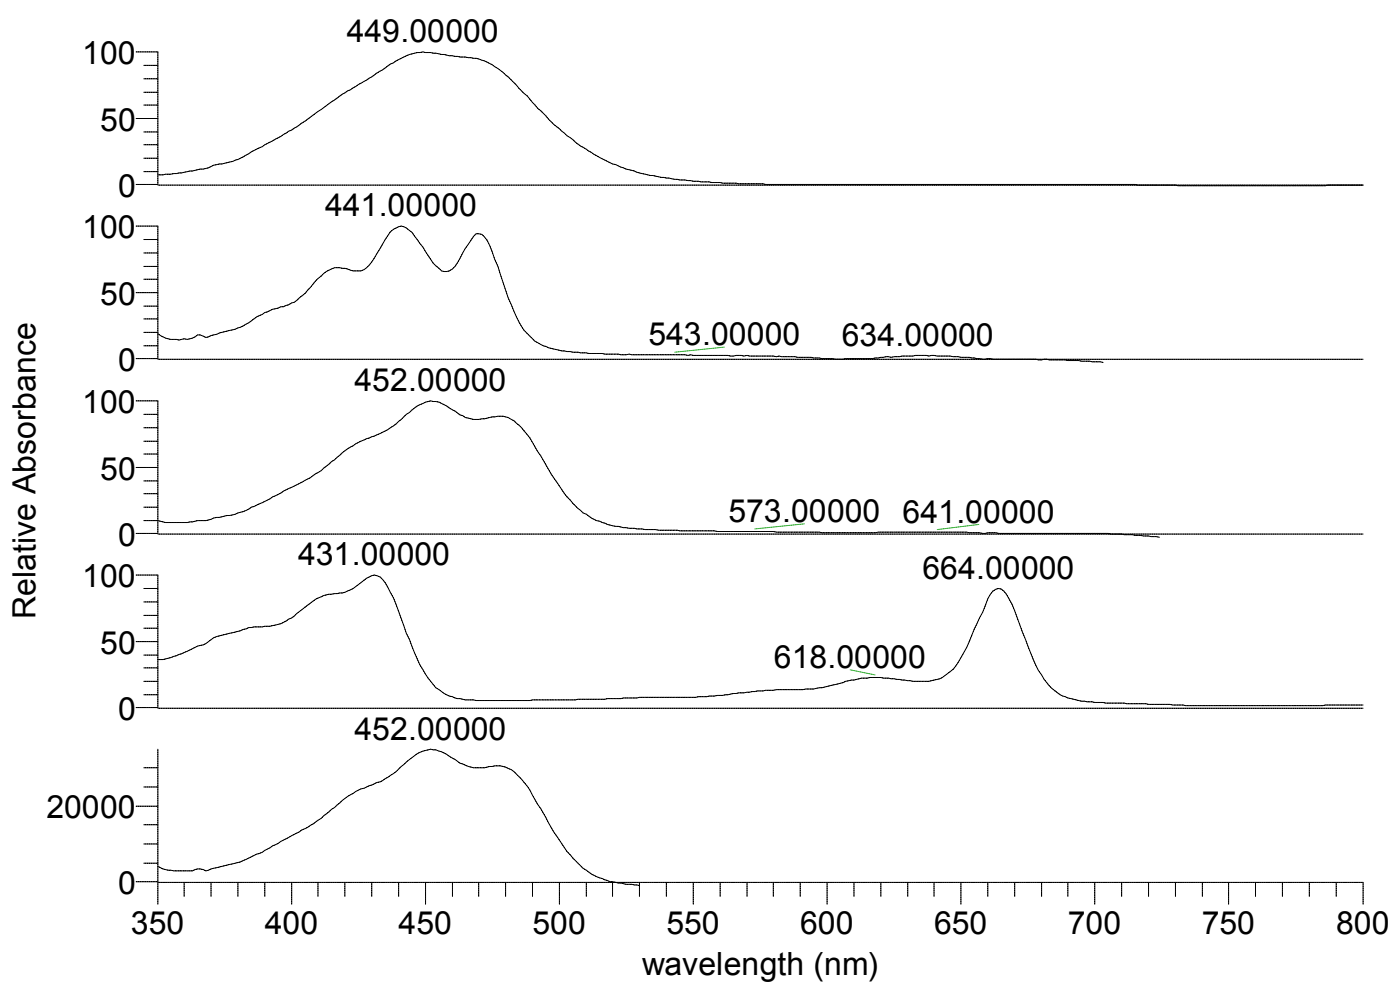NL:  
2.49E5  
80#6279 RT:  
20.93 AV: 1NL:  
1.22E4  
80#6576 RT:  
21.92 AV: 1NL:  
4.58E4  
80#7443 RT:  
24.81 AV: 1NL:  
2.29E5  
80#10971  
RT: 36.57  
AV: 1NL:  
3.48E4  
80#13221  
RT: 44.07  
AV: 1

Supplement: Data_Sheet_1.zip [file Muestra80_HPLC-UV.pdf › Carotenoids/Muestra80_HPLC-UV.pdf]

RT: 0.00 - 61.20

NL:  
1.97E5  
Total Scan  
PDA 81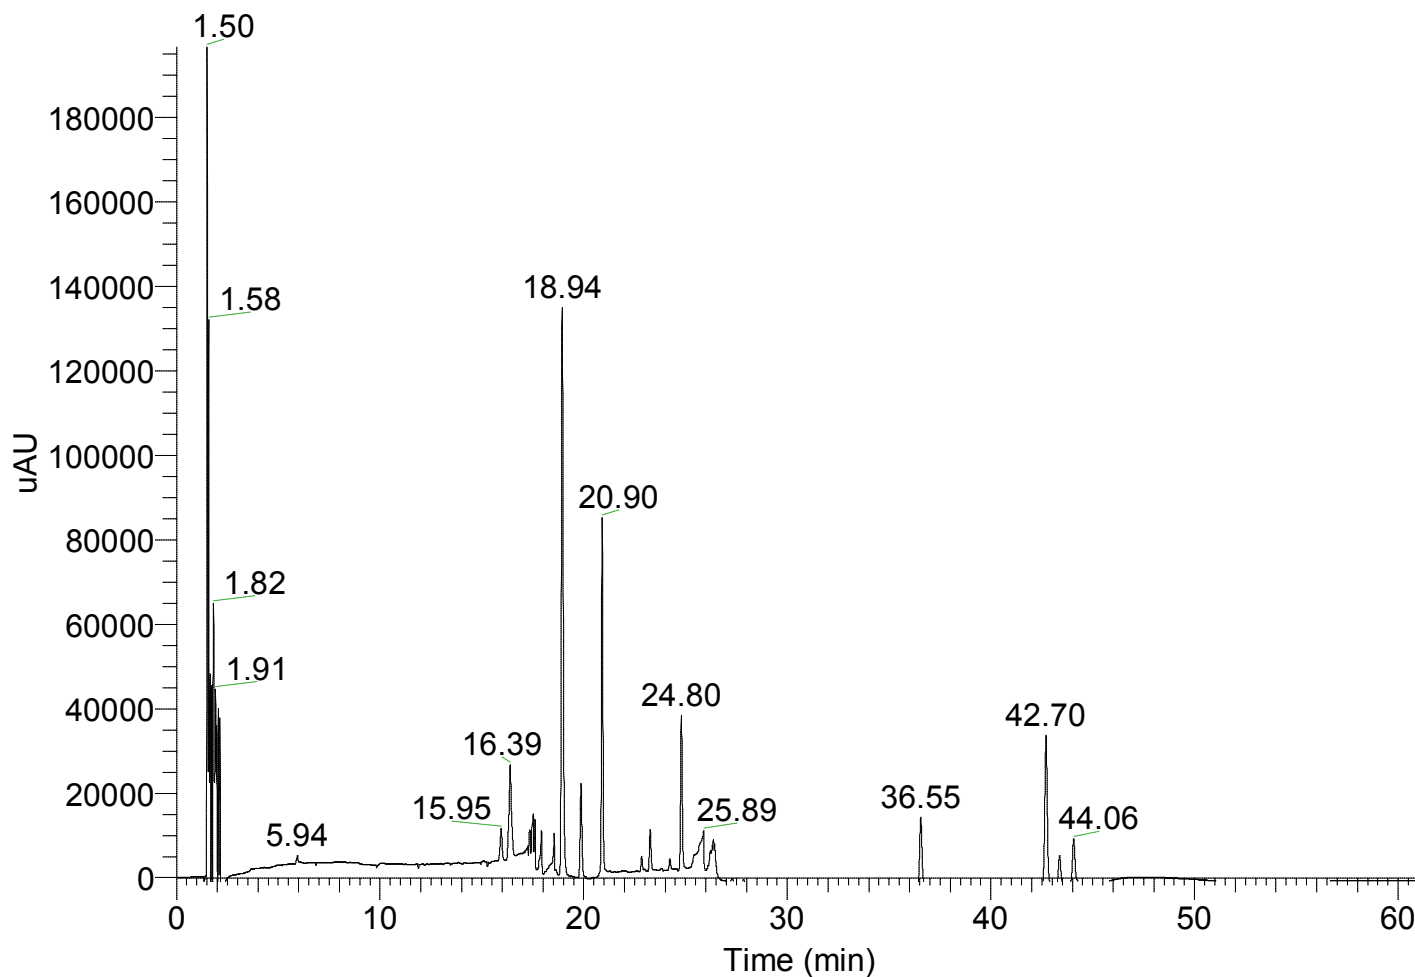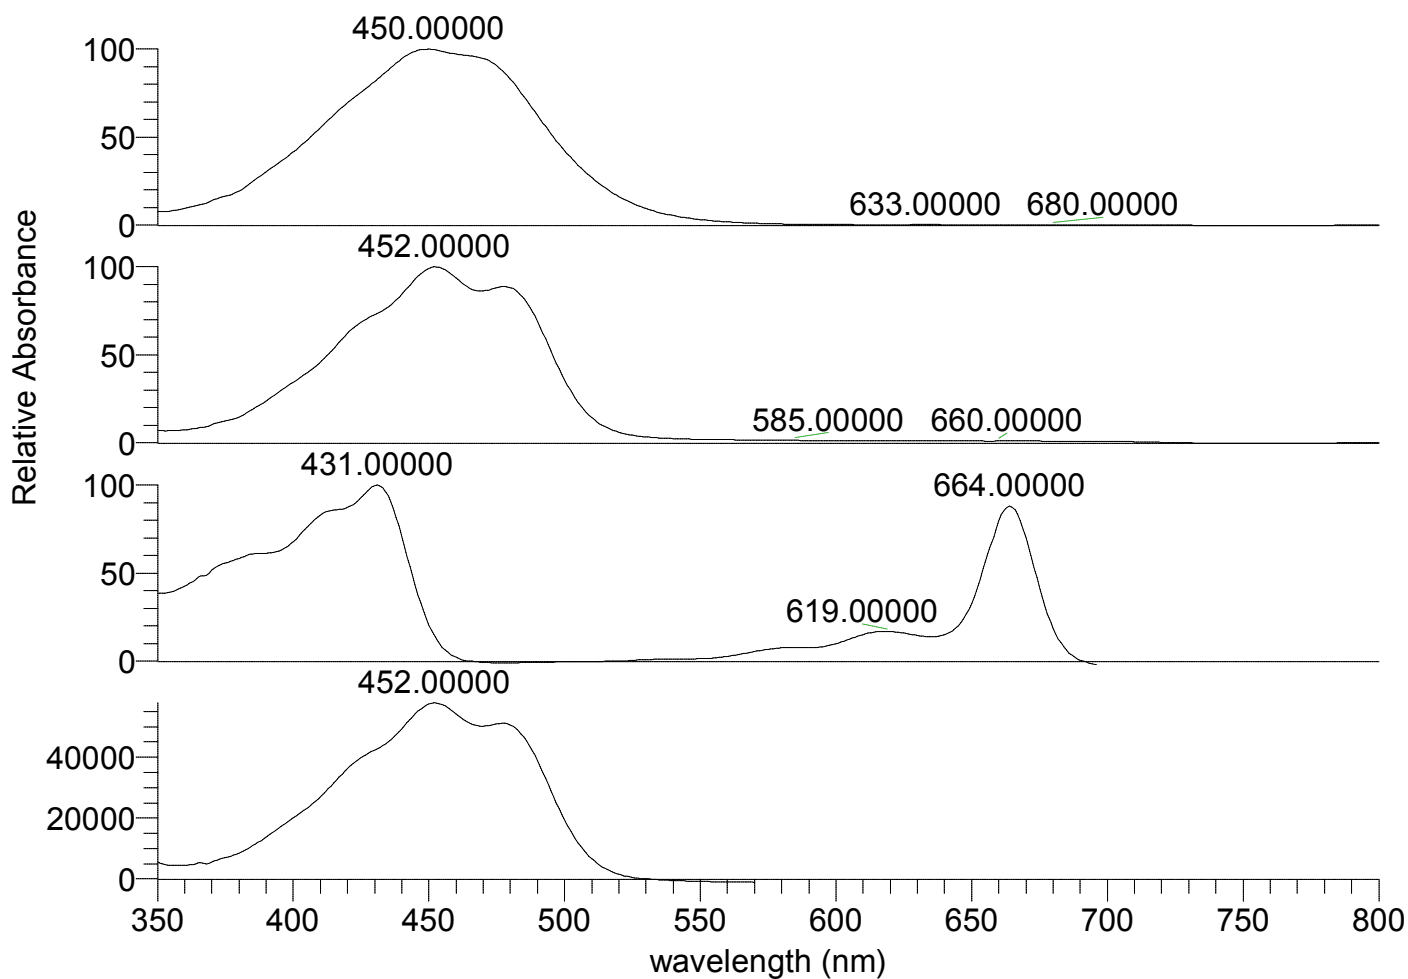NL:  
3.96E5  
81#6270  
RT: 20.90  
AV: 1NL:  
1.97E5  
81#7439  
RT: 24.80  
AV: 1NL:  
7.16E4  
81#10965  
RT: 36.55  
AV: 1NL:  
5.78E4  
81#13217  
RT: 44.06  
AV: 1

Supplement: Data_Sheet_1.zip [file Muestra81_HPLC-UV.pdf › Carotenoids/Muestra81_HPLC-UV.pdf]

RT: 0.00 - 61.20

NL:  
1.92E5  
Total Scan  
PDA 82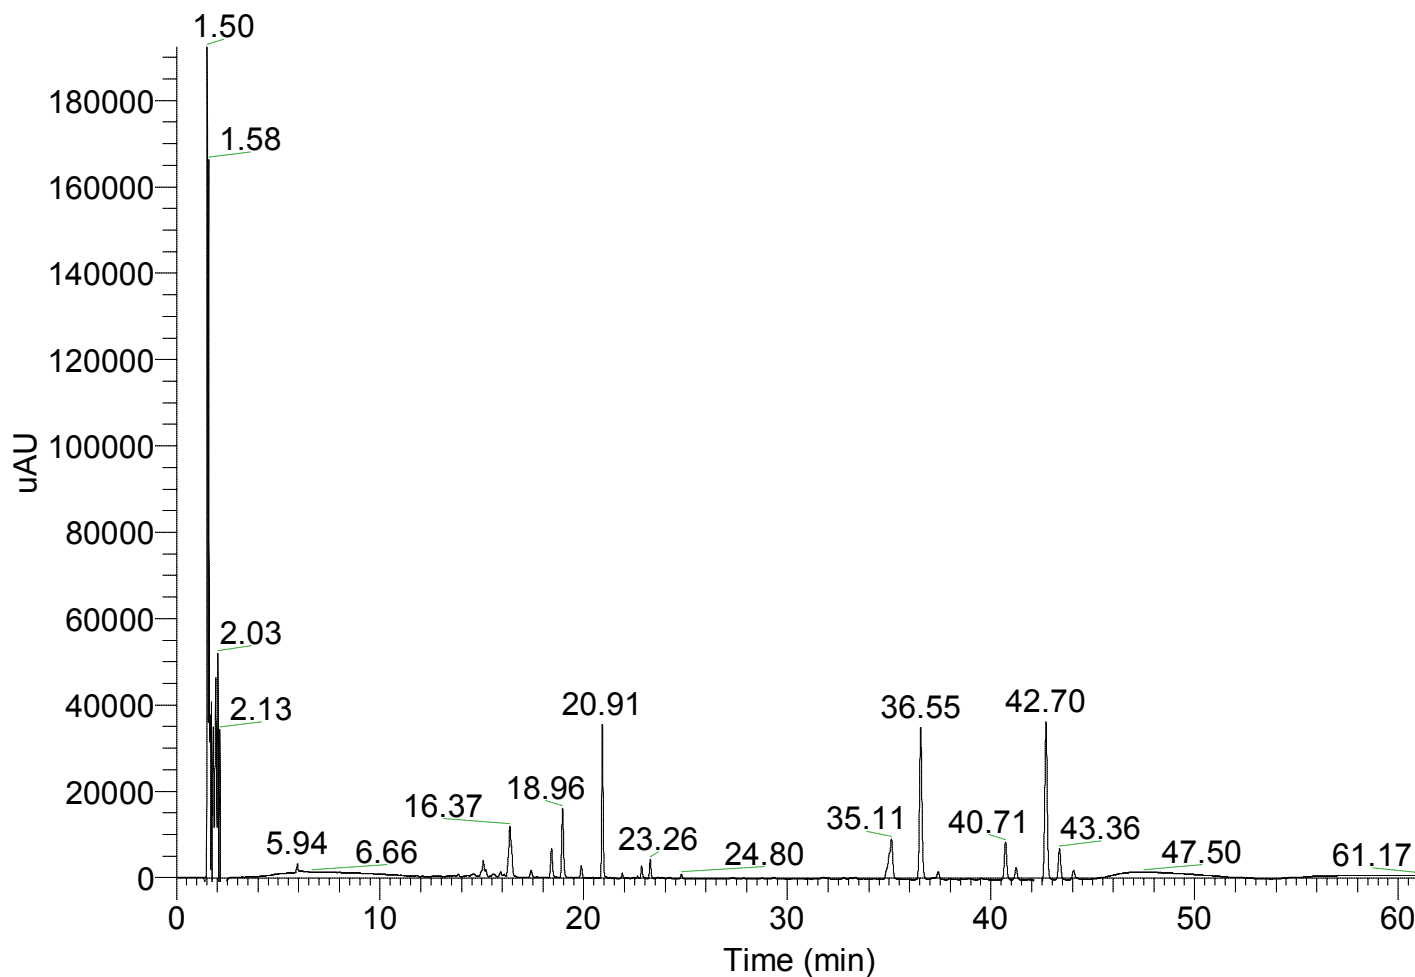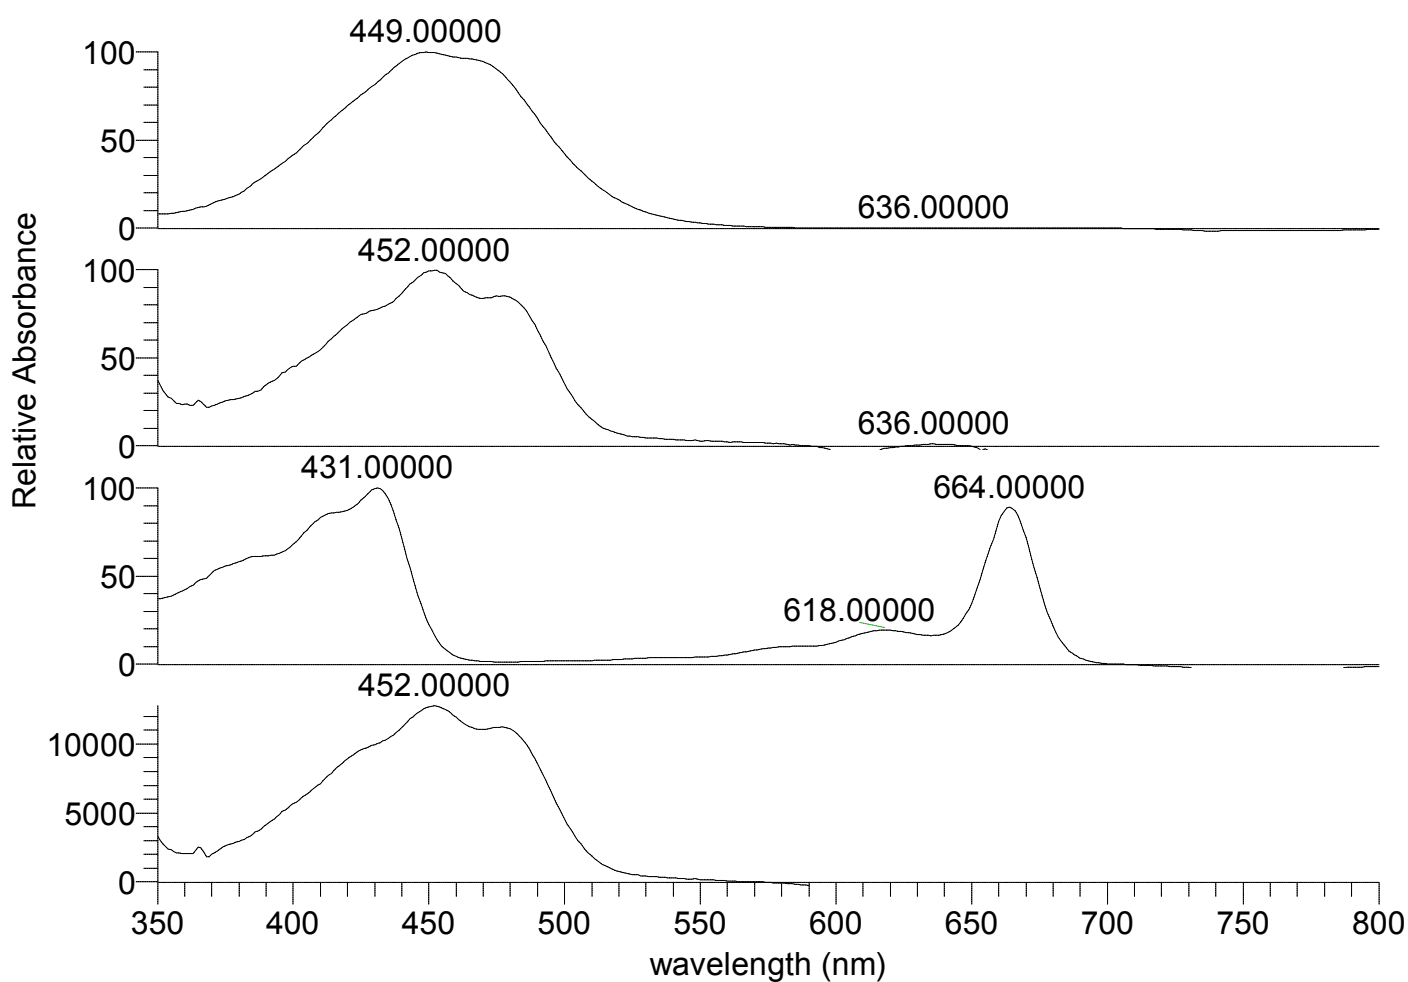NL:  
1.67E5  
82#6273  
RT: 20.91  
AV: 1NL:  
6.78E3  
82#7440  
RT: 24.80  
AV: 1NL:  
1.56E5  
82#10965  
RT: 36.55  
AV: 1NL:  
1.28E4  
82#13220  
RT: 44.07  
AV: 1

Supplement: Data_Sheet_1.zip [file Muestra82_HPLC-UV.pdf › Carotenoids/Muestra82_HPLC-UV.pdf]

RT: 0.00 - 61.20

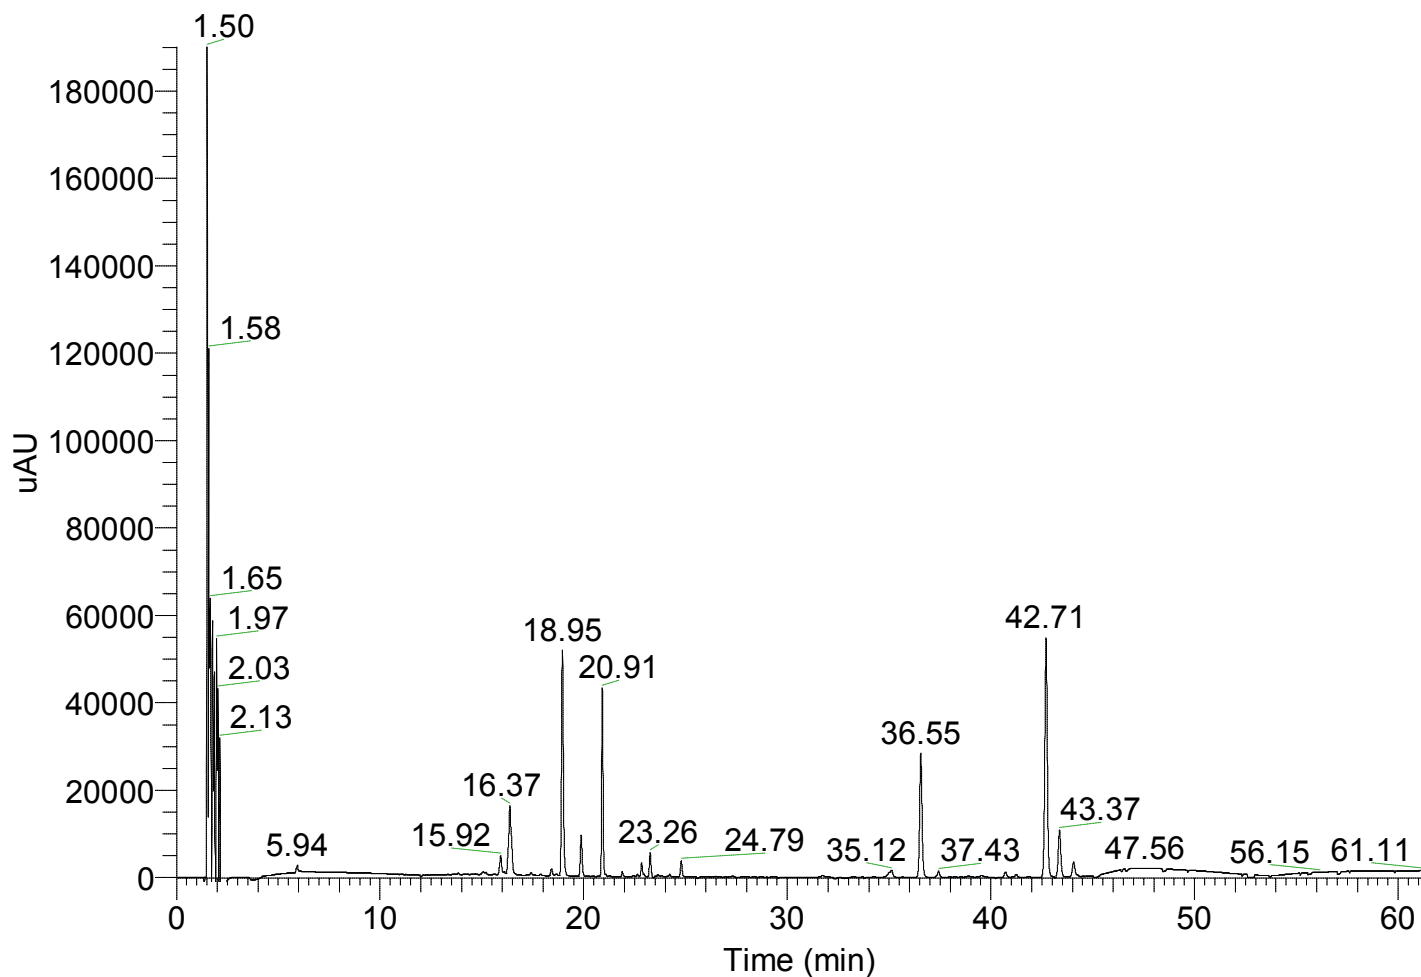

NL:  
1.90E5  
Total Scan  
PDA 83

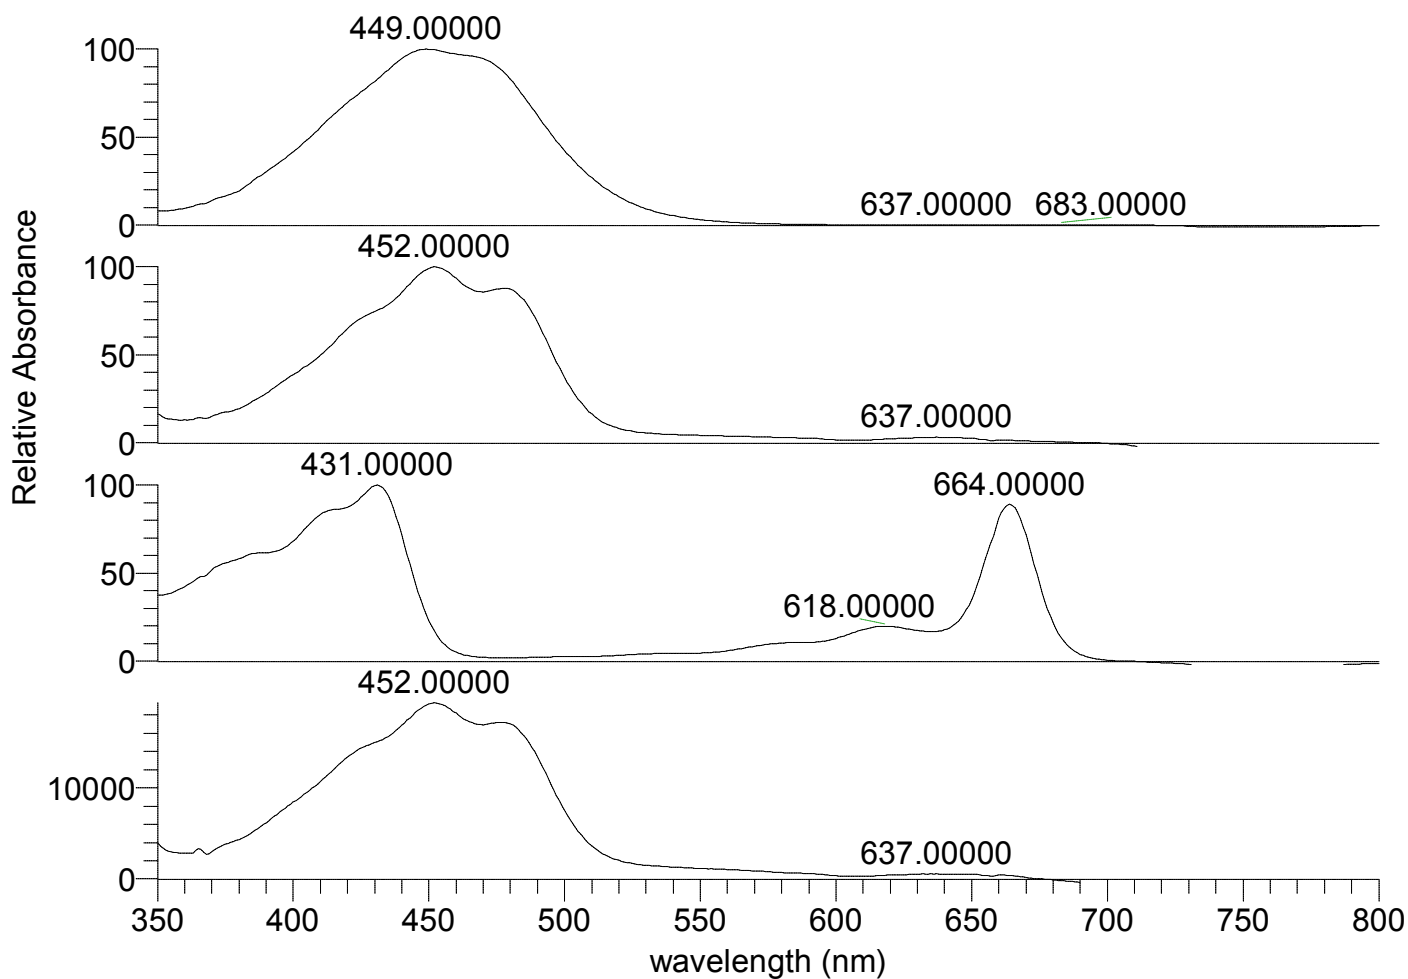

NL:  
2.04E5  
83#6273  
RT: 20.91  
AV: 1

NL:  
2.09E4  
83#7437  
RT: 24.79  
AV: 1

NL:  
1.26E5  
83#10966  
RT: 36.55  
AV: 1

NL:  
1.93E4  
83#13218  
RT: 44.06  
AV: 1

Supplement: Data_Sheet_1.zip [file Muestra83_HPLC-UV.pdf › Carotenoids/Muestra83_HPLC-UV.pdf]

RT: 0.00 - 61.23

NL:  
2.10E5  
Total Scan  
PDA 84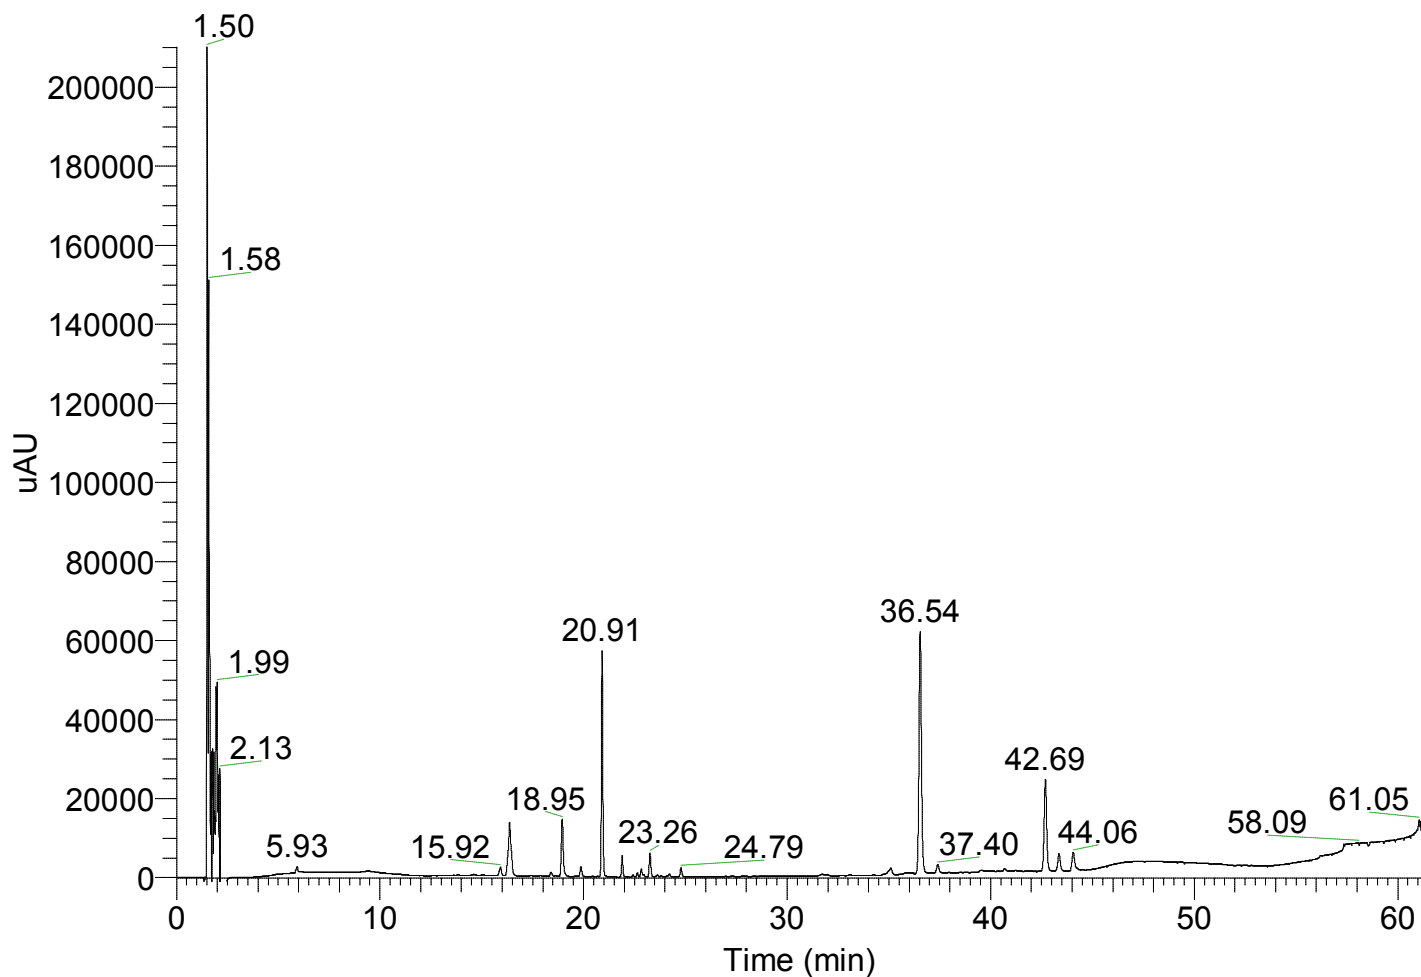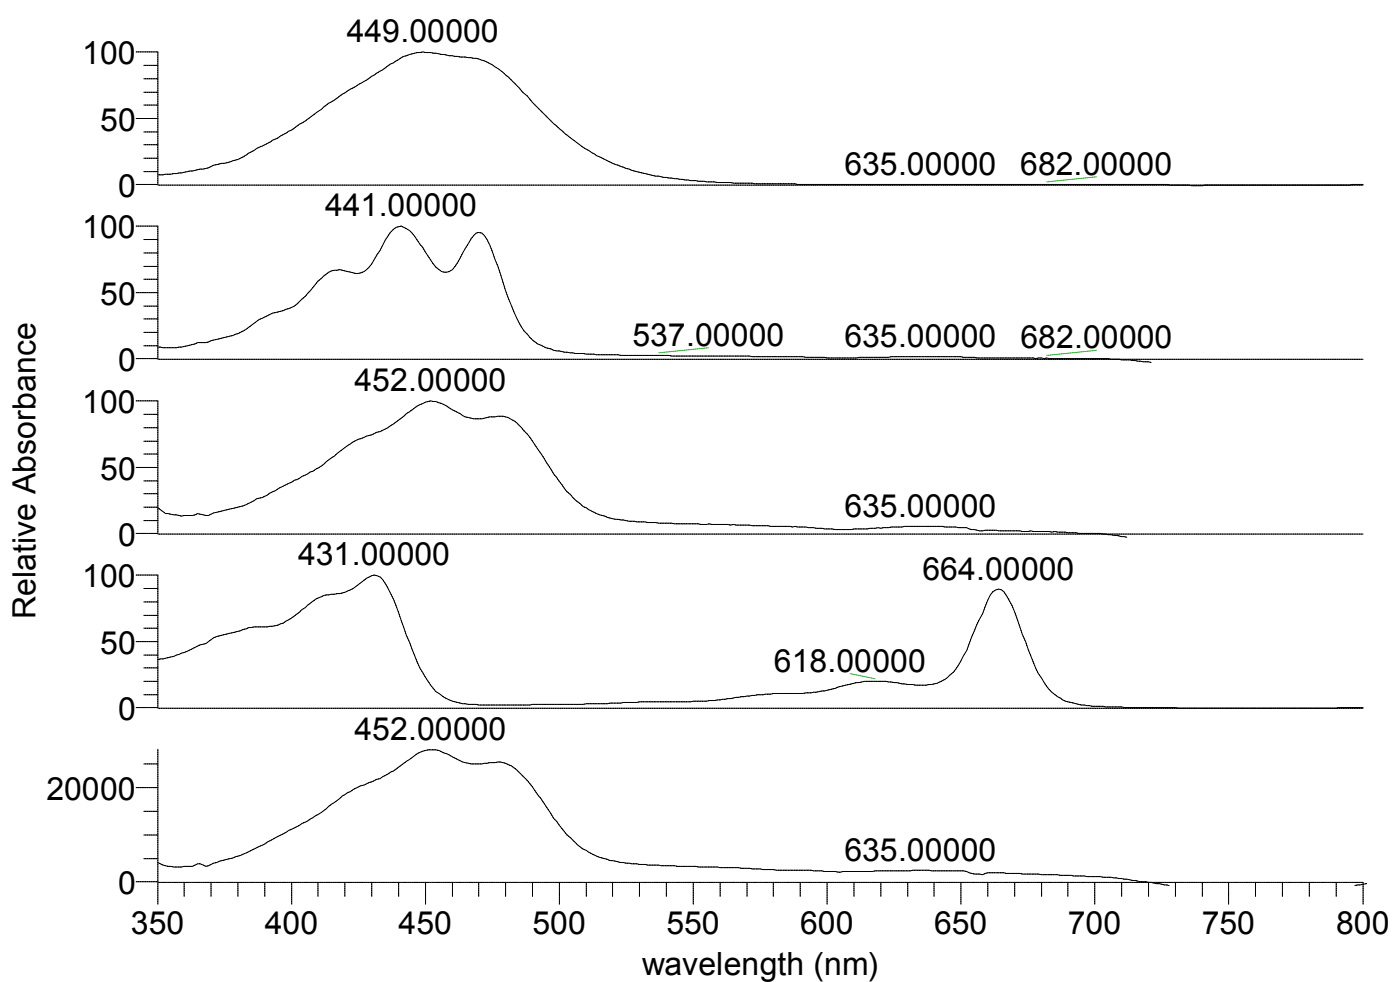NL:  
2.63E5  
84#6274 RT:  
20.91 AV: 1NL:  
3.58E4  
84#6569 RT:  
21.90 AV: 1NL:  
1.36E4  
84#7437 RT:  
24.79 AV: 1NL:  
2.70E5  
84#10962  
RT: 36.54  
AV: 1NL:  
2.80E4  
84#13218  
RT: 44.06  
AV: 1

Supplement: Data_Sheet_1.zip [file Muestra84_HPLC-UV.pdf › Carotenoids/Muestra84_HPLC-UV.pdf]

RT: 0.00 - 61.20

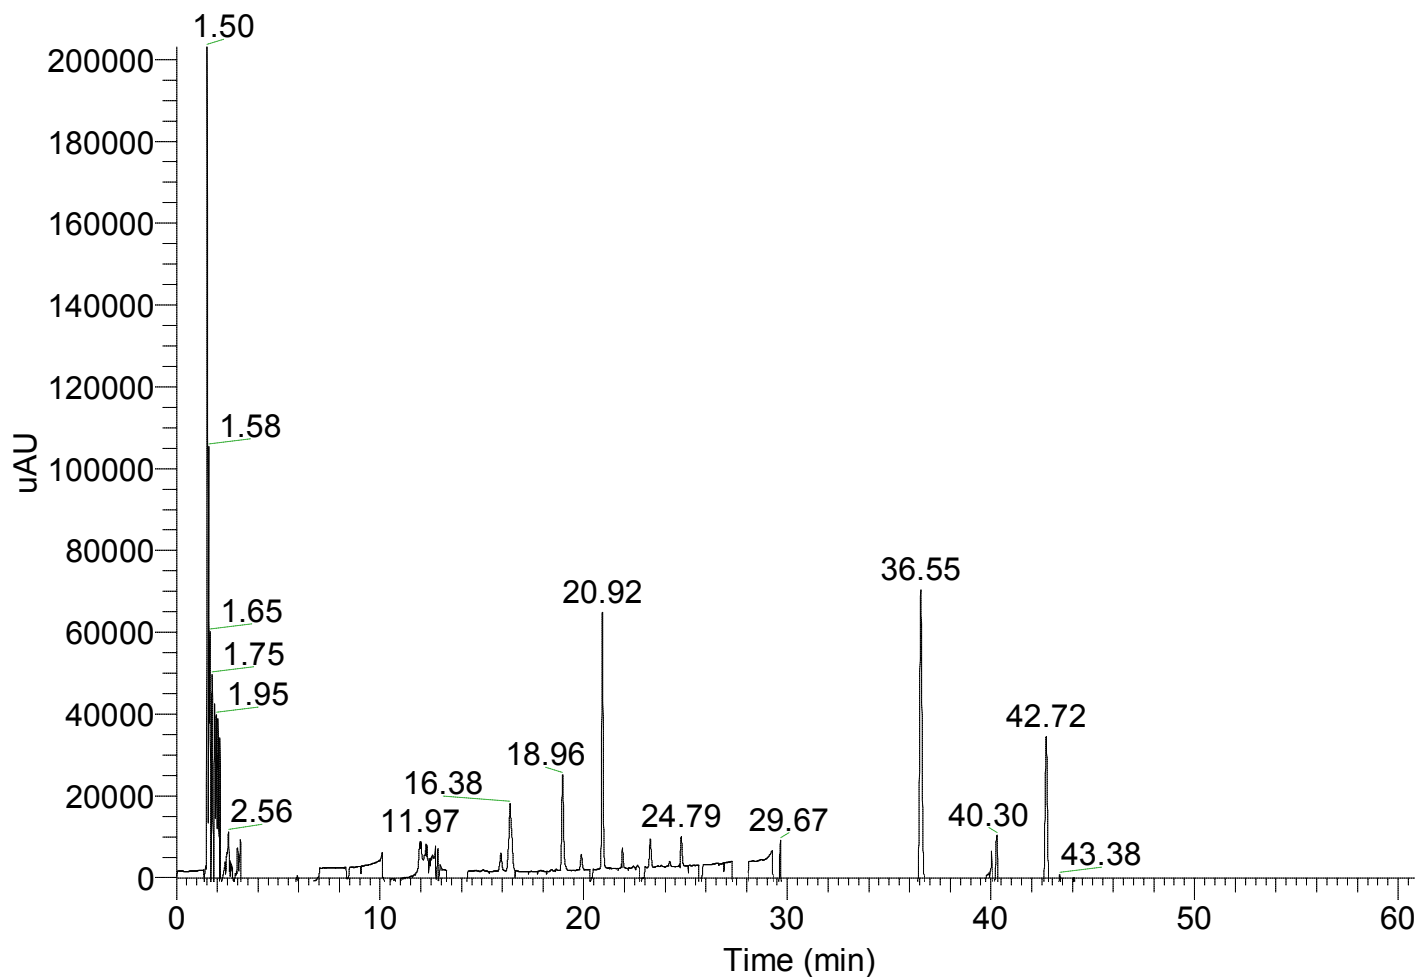

NL:  
2.03E5  
Total Scan  
PDA 85

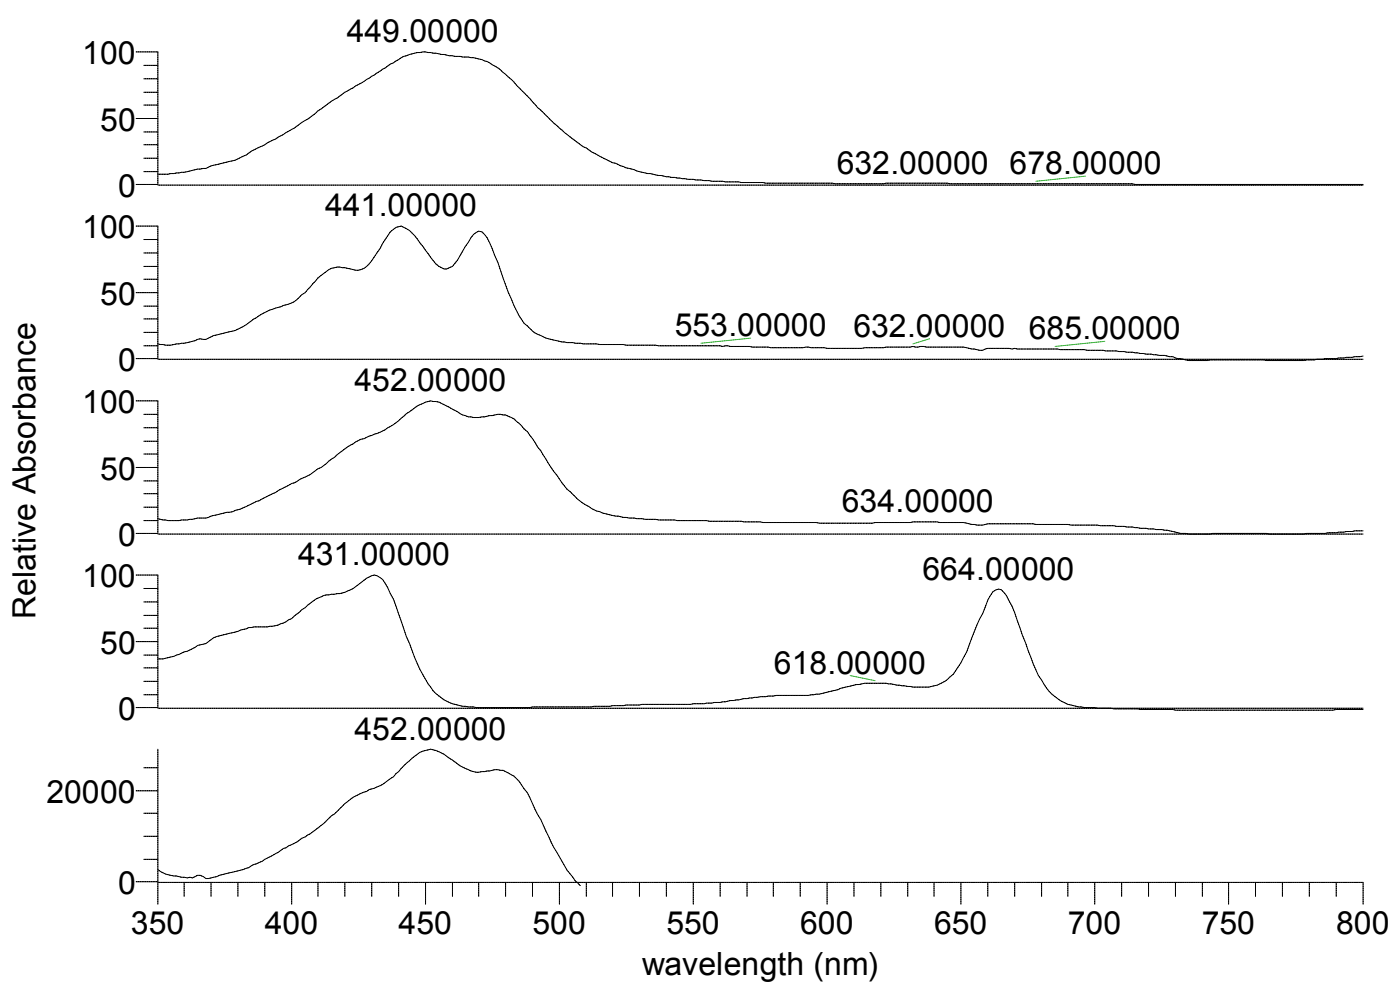

NL:  
2.97E5  
85#6275 RT:  
20.92 AV: 1

NL:  
3.45E4  
85#6570 RT:  
21.90 AV: 1

NL:  
4.27E4  
85#7437 RT:  
24.79 AV: 1

NL:  
3.20E5  
85#10964  
RT: 36.55  
AV: 1

NL:  
2.90E4  
85#13224  
RT: 44.08  
AV: 1

Supplement: Data_Sheet_1.zip [file Muestra85_HPLC-UV.pdf › Carotenoids/Muestra85_HPLC-UV.pdf]

RT: 0.00 - 61.20

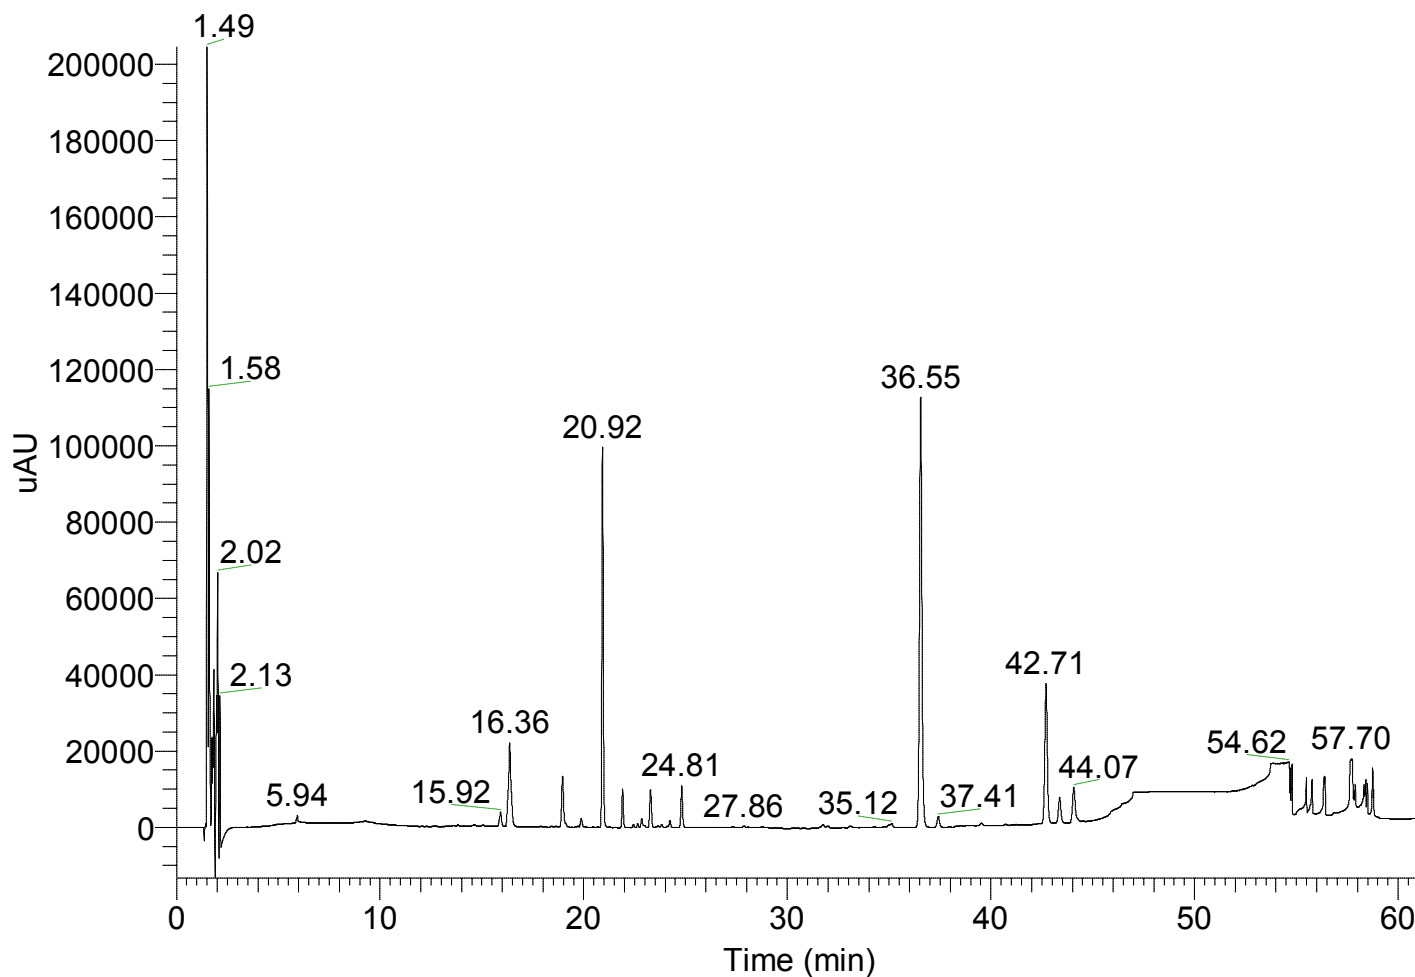

NL:  
2.04E5  
Total Scan  
PDA 86

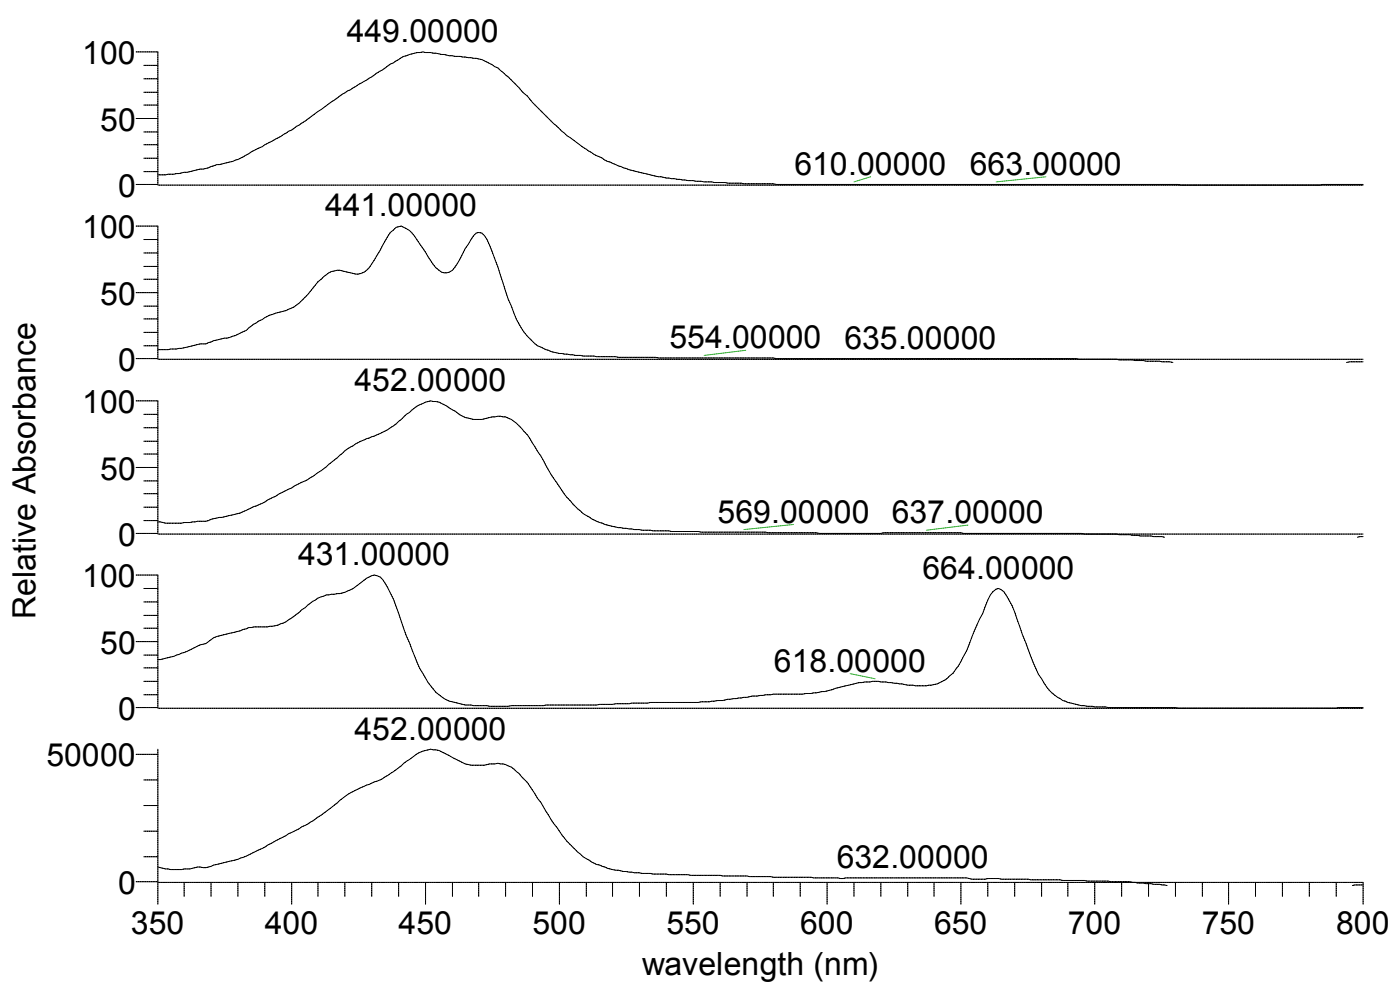

NL:  
4.59E5  
86#6275 RT:  
20.92 AV: 1

NL:  
6.55E4  
86#6572 RT:  
21.91 AV: 1

NL:  
5.92E4  
86#7443 RT:  
24.81 AV: 1

NL:  
4.96E5  
86#10965  
RT: 36.55  
AV: 1

NL:  
5.18E4  
86#13221  
RT: 44.07  
AV: 1

Supplement: Data_Sheet_1.zip [file Muestra86_HPLC-UV.pdf › Carotenoids/Muestra86_HPLC-UV.pdf]

RT: 0.00 - 61.20

NL:  
2.07E5  
Total Scan  
PDA 87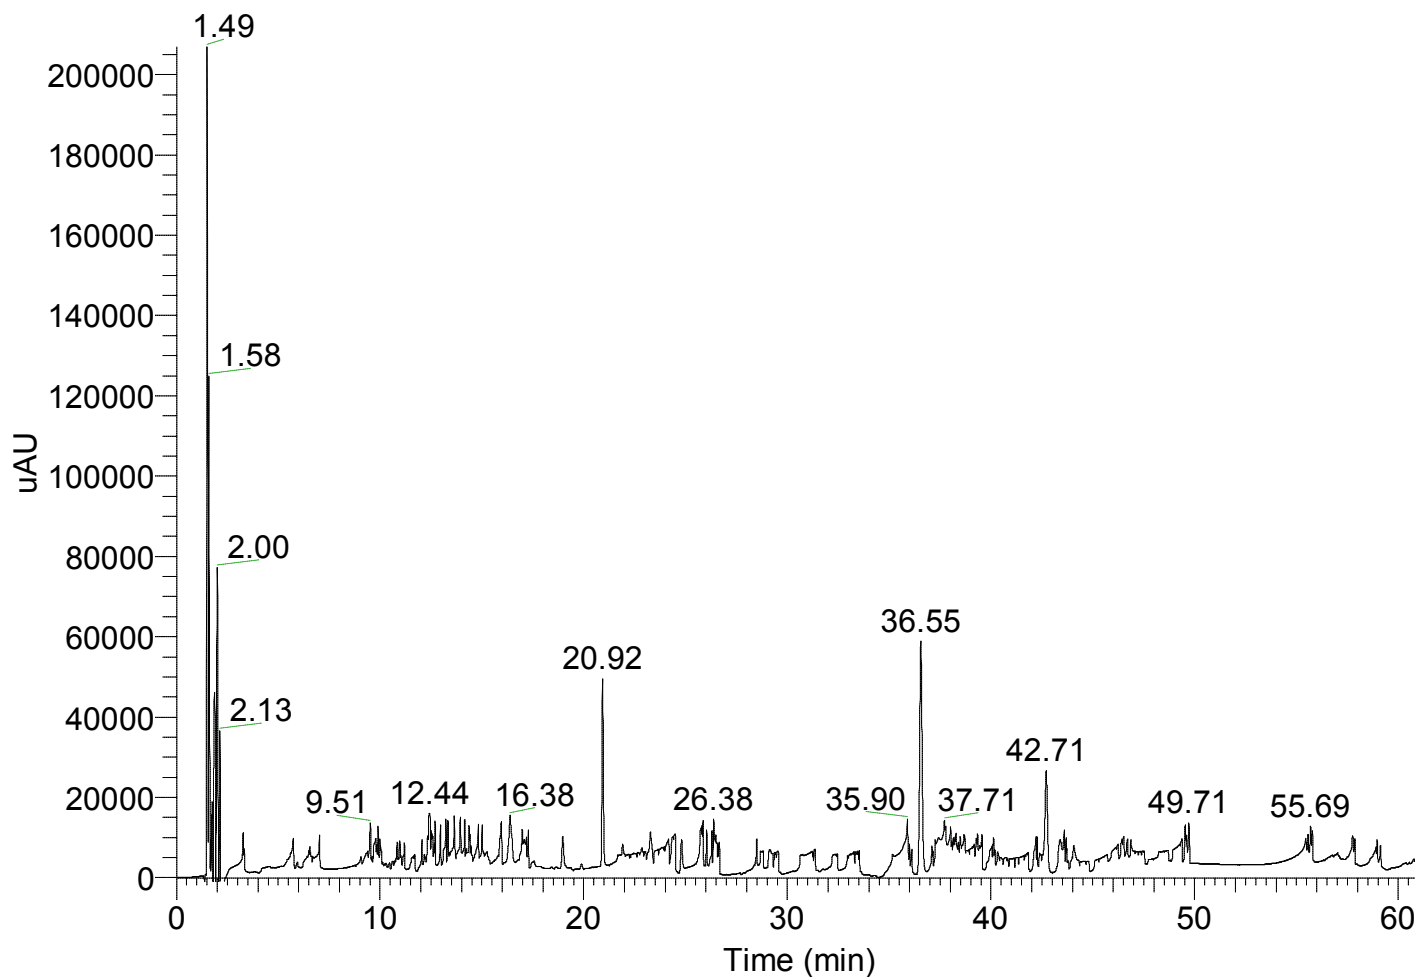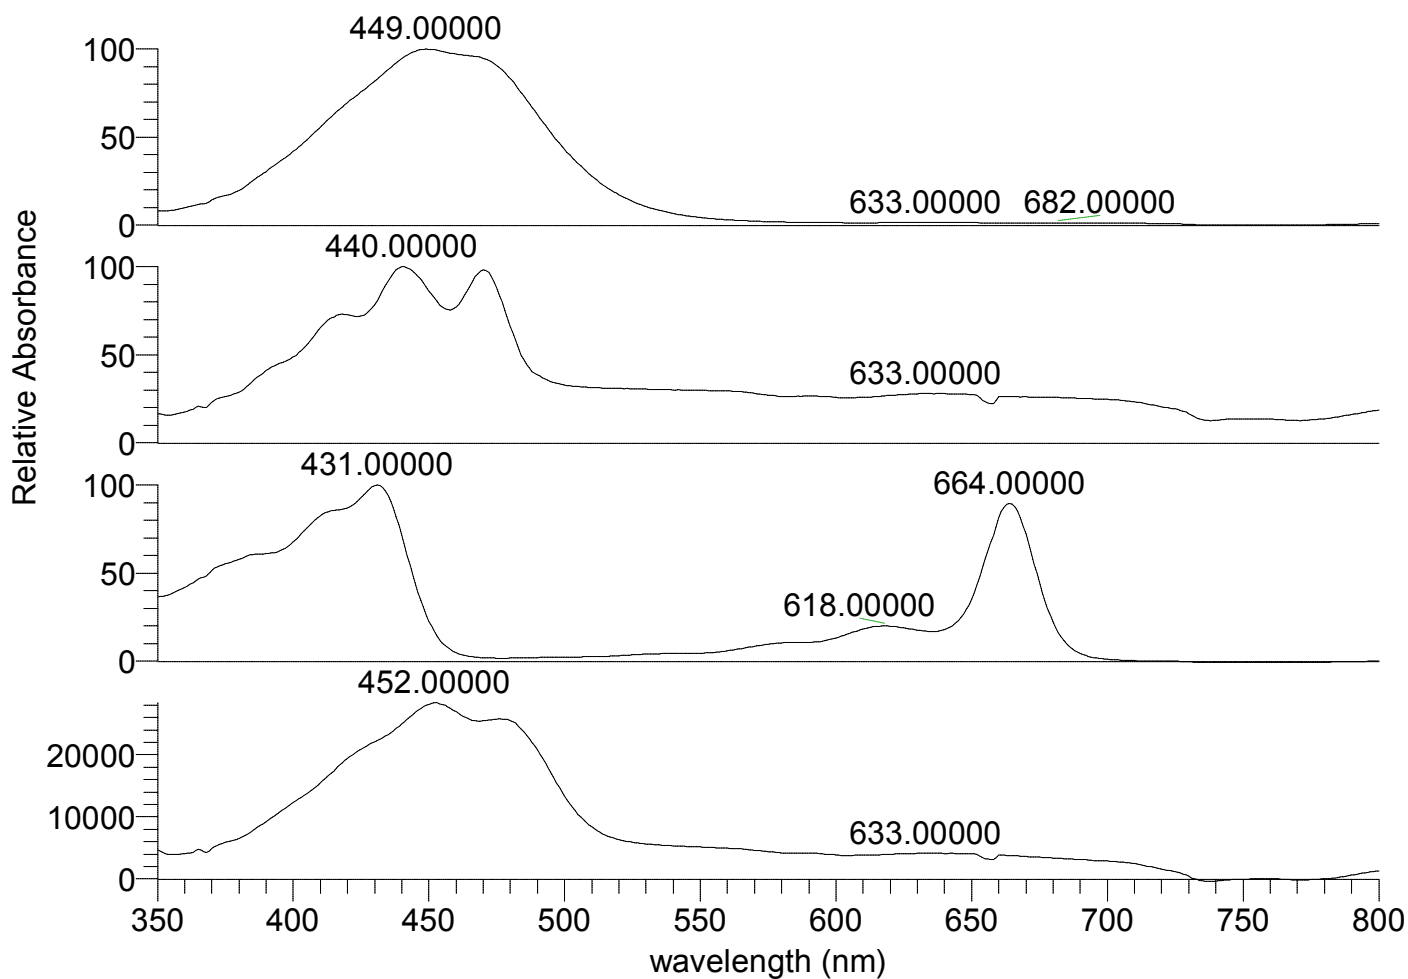NL:  
2.23E5  
87#6277  
RT: 20.92  
AV: 1NL:  
2.34E4  
87#6571  
RT: 21.90  
AV: 1NL:  
2.57E5  
87#10965  
RT: 36.55  
AV: 1NL:  
2.83E4  
87#13224  
RT: 44.08  
AV: 1

Supplement: Data_Sheet_1.zip [file Muestra87_HPLC-UV.pdf › Carotenoids/Muestra87_HPLC-UV.pdf]

RT: 0.00 - 61.20

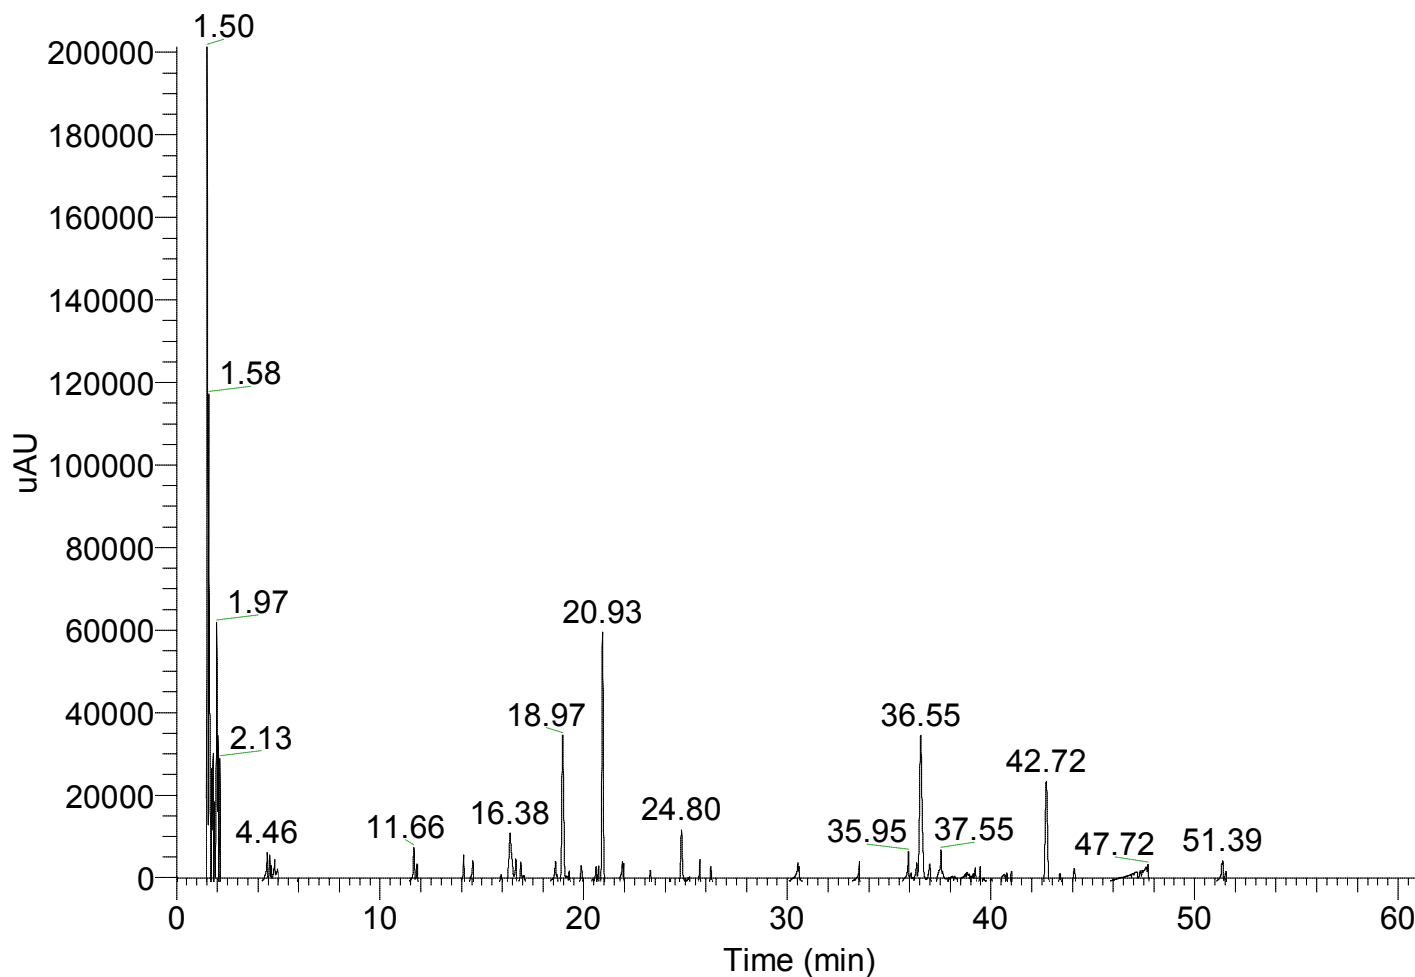

NL:  
2.01E5  
Total Scan  
PDA 88

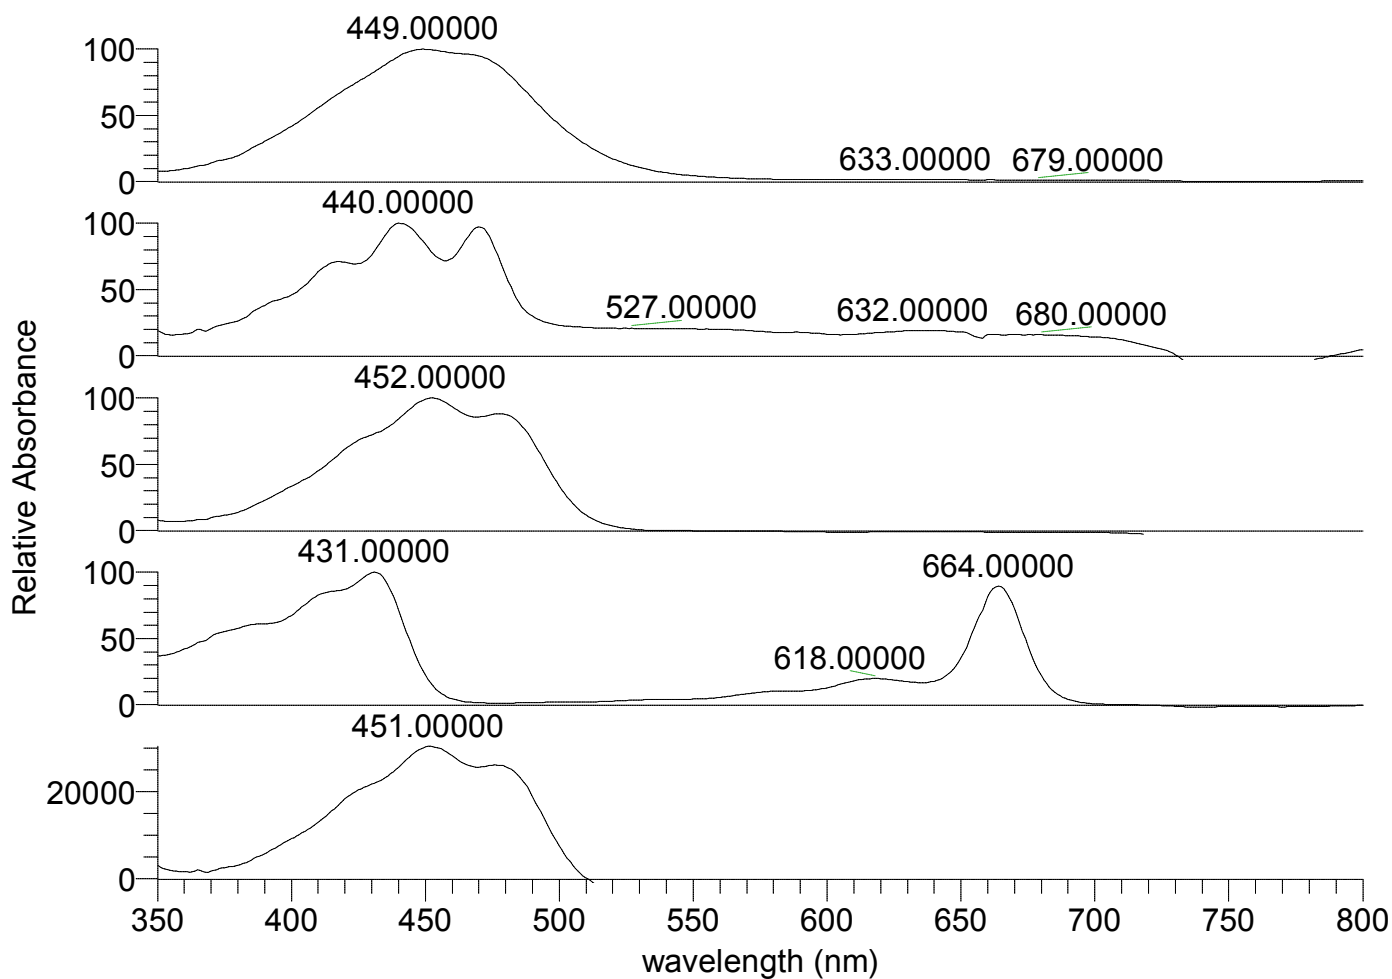

NL:  
2.64E5  
88#6279 RT:  
20.93 AV: 1

NL:  
1.35E4  
88#6570 RT:  
21.90 AV: 1

NL:  
6.65E4  
88#7441 RT:  
24.80 AV: 1

NL:  
1.53E5  
88#10965  
RT: 36.55  
AV: 1

NL:  
3.04E4  
88#13228  
RT: 44.09  
AV: 1

Supplement: Data_Sheet_1.zip [file Muestra88_HPLC-UV.pdf › Carotenoids/Muestra88_HPLC-UV.pdf]

RT: 0.00 - 61.23

NL:  
2.14E5  
Total Scan  
PDA 89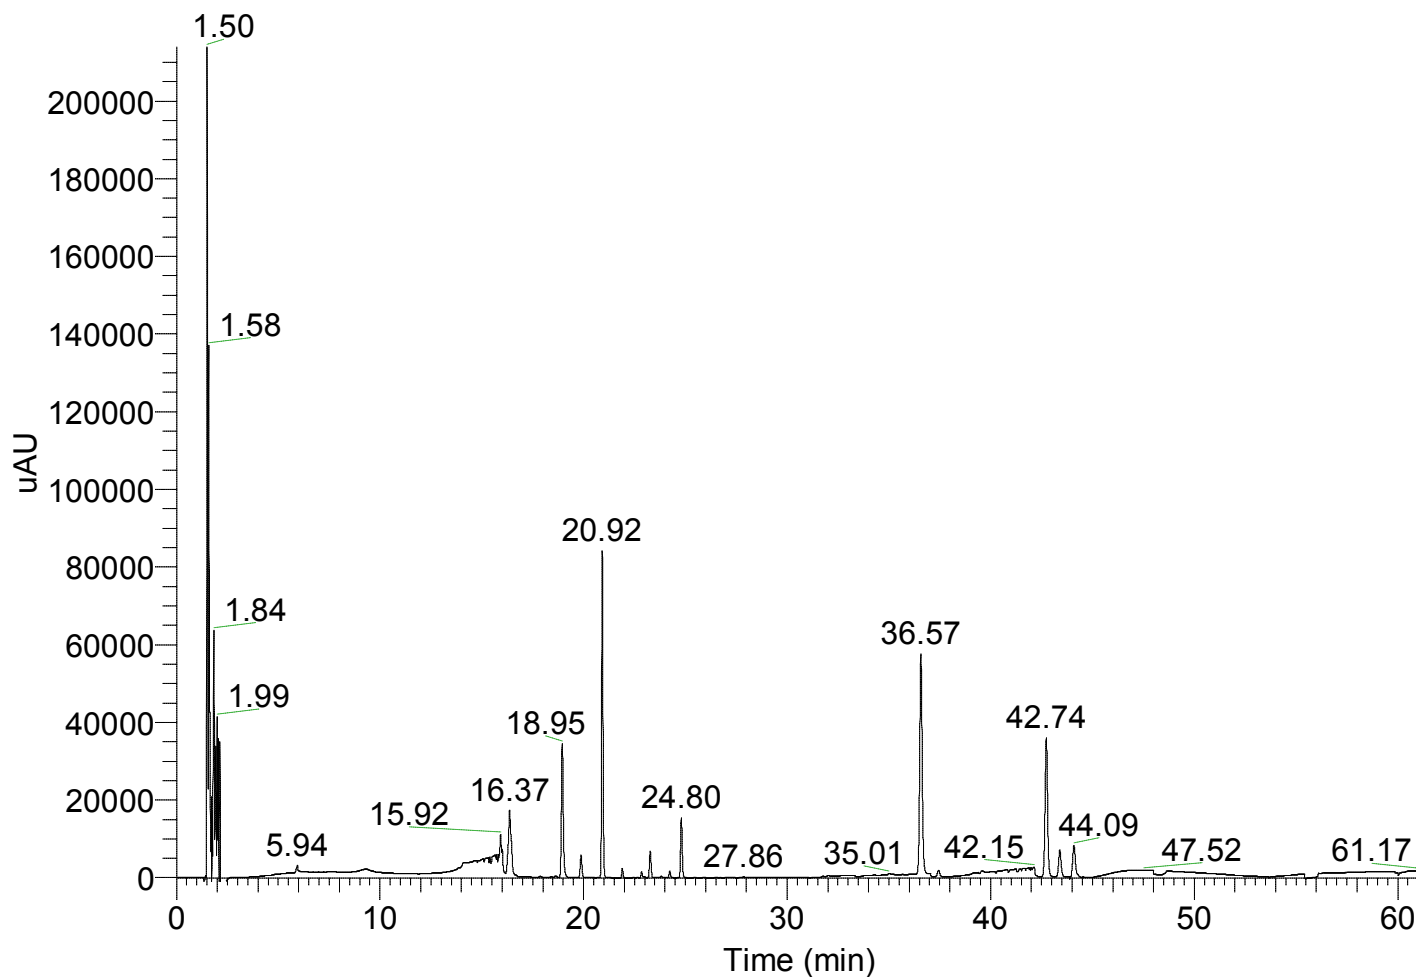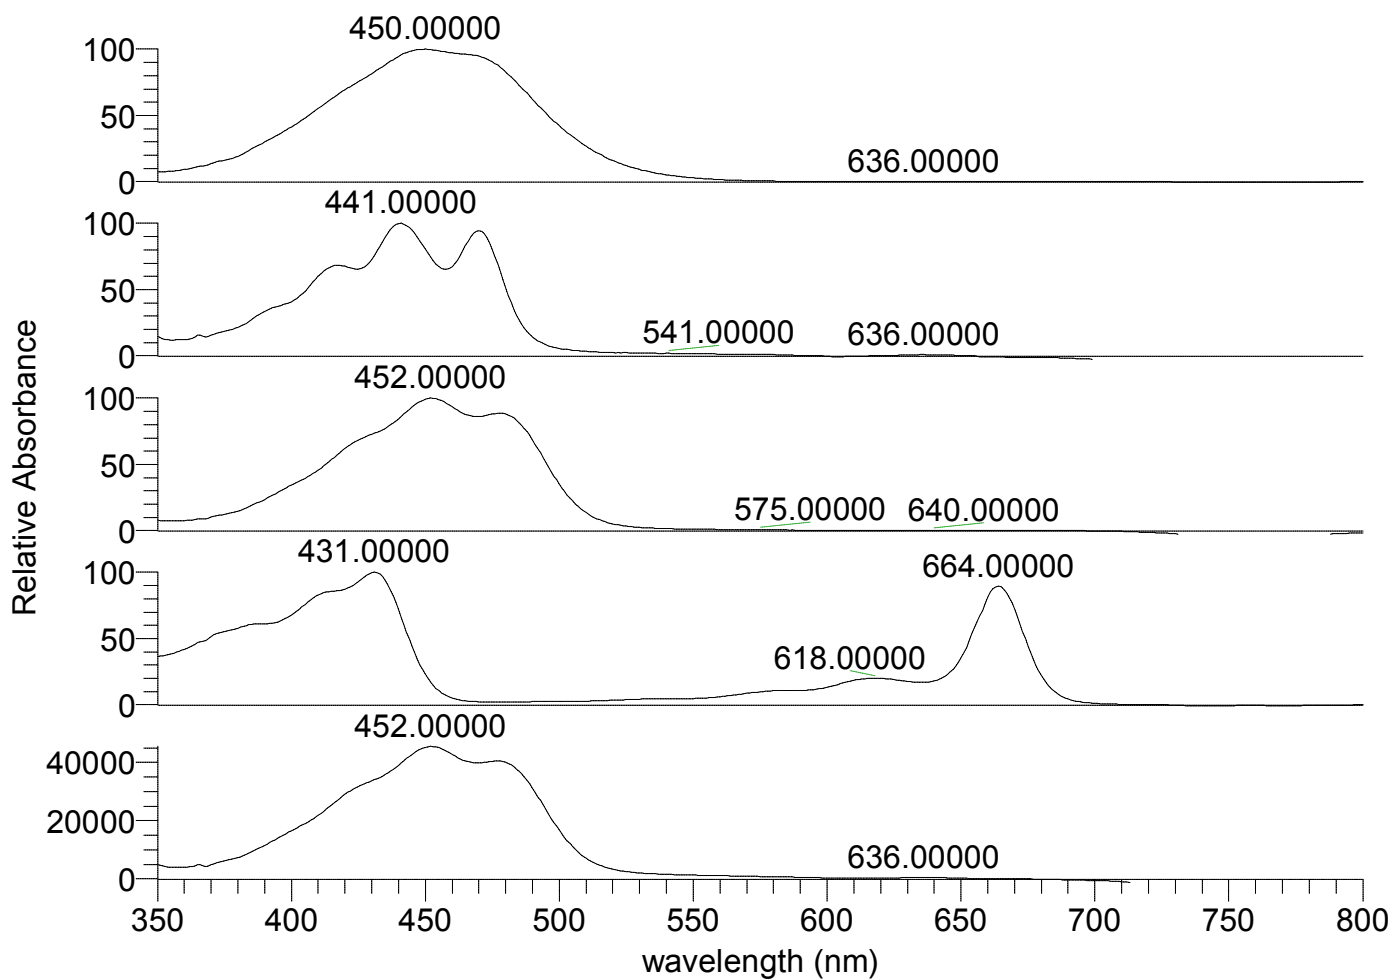NL:  
3.95E5  
89#6276 RT:  
20.92 AV: 1NL:  
1.74E4  
89#6572 RT:  
21.91 AV: 1NL:  
8.38E4  
89#7440 RT:  
24.80 AV: 1NL:  
2.51E5  
89#10971  
RT: 36.57  
AV: 1NL:  
4.55E4  
89#13227  
RT: 44.09  
AV: 1

Supplement: Data_Sheet_1.zip [file Muestra89_HPLC-UV.pdf › Carotenoids/Muestra89_HPLC-UV.pdf]

RT: 0.00 - 61.20

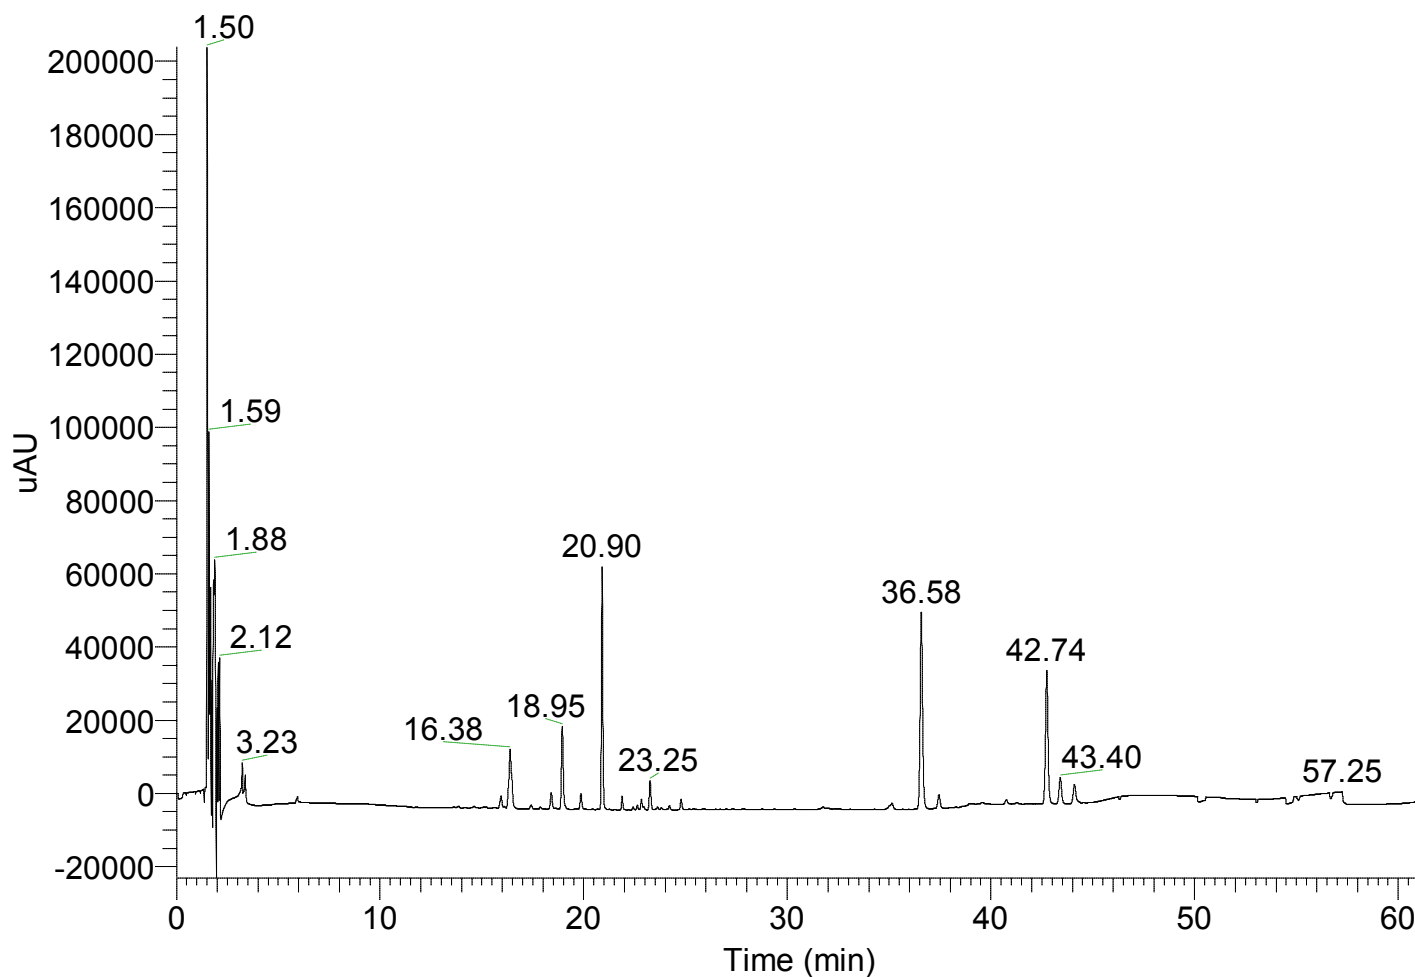

NL:  
2.04E5  
Total Scan  
PDA 90

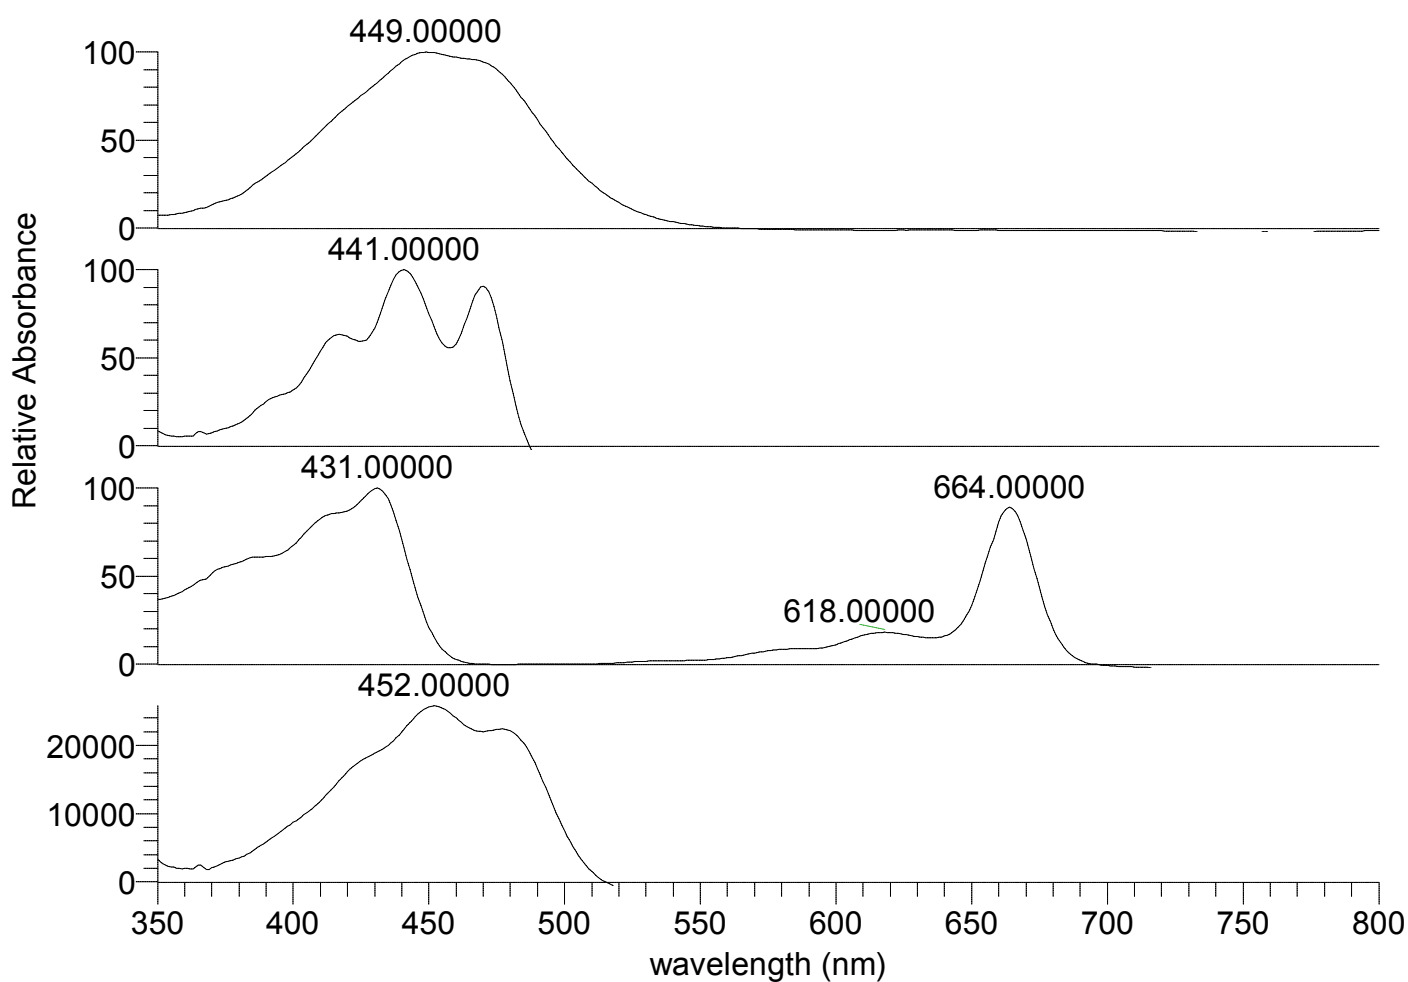

NL:  
3.07E5  
90#6270  
RT: 20.90  
AV: 1

NL:  
1.97E4  
90#6565  
RT: 21.88  
AV: 1

NL:  
2.33E5  
90#10973  
RT: 36.58  
AV: 1

NL:  
2.57E4  
90#13231  
RT: 44.10  
AV: 1

Supplement: Data_Sheet_1.zip [file Muestra90_HPLC-UV.pdf › Carotenoids/Muestra90_HPLC-UV.pdf]

RT: 0.00 - 61.20

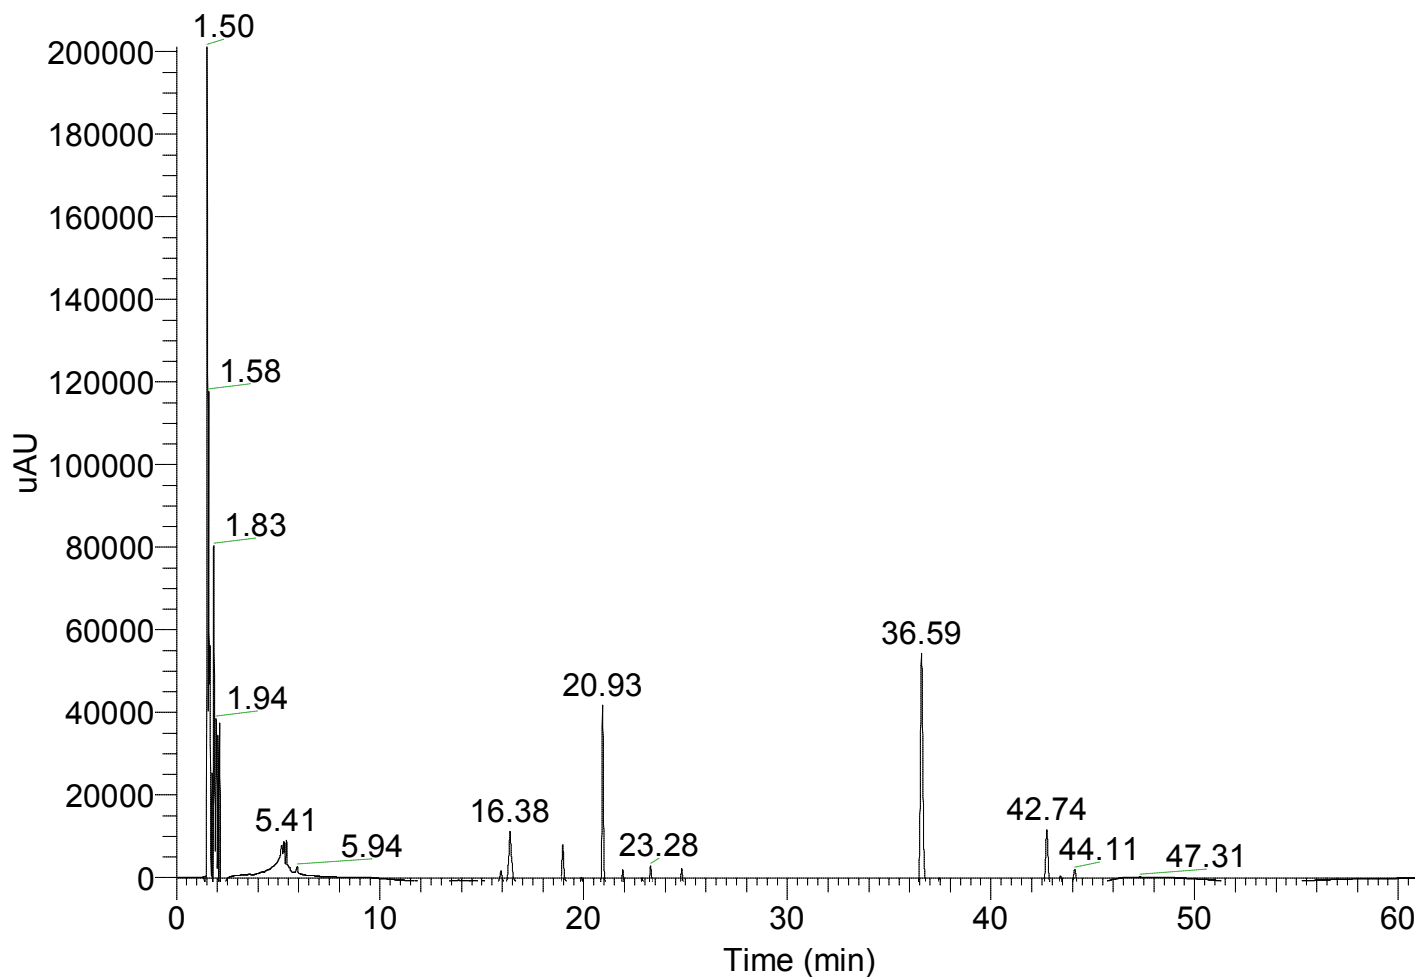

NL:  
2.01E5  
Total Scan  
PDA 91

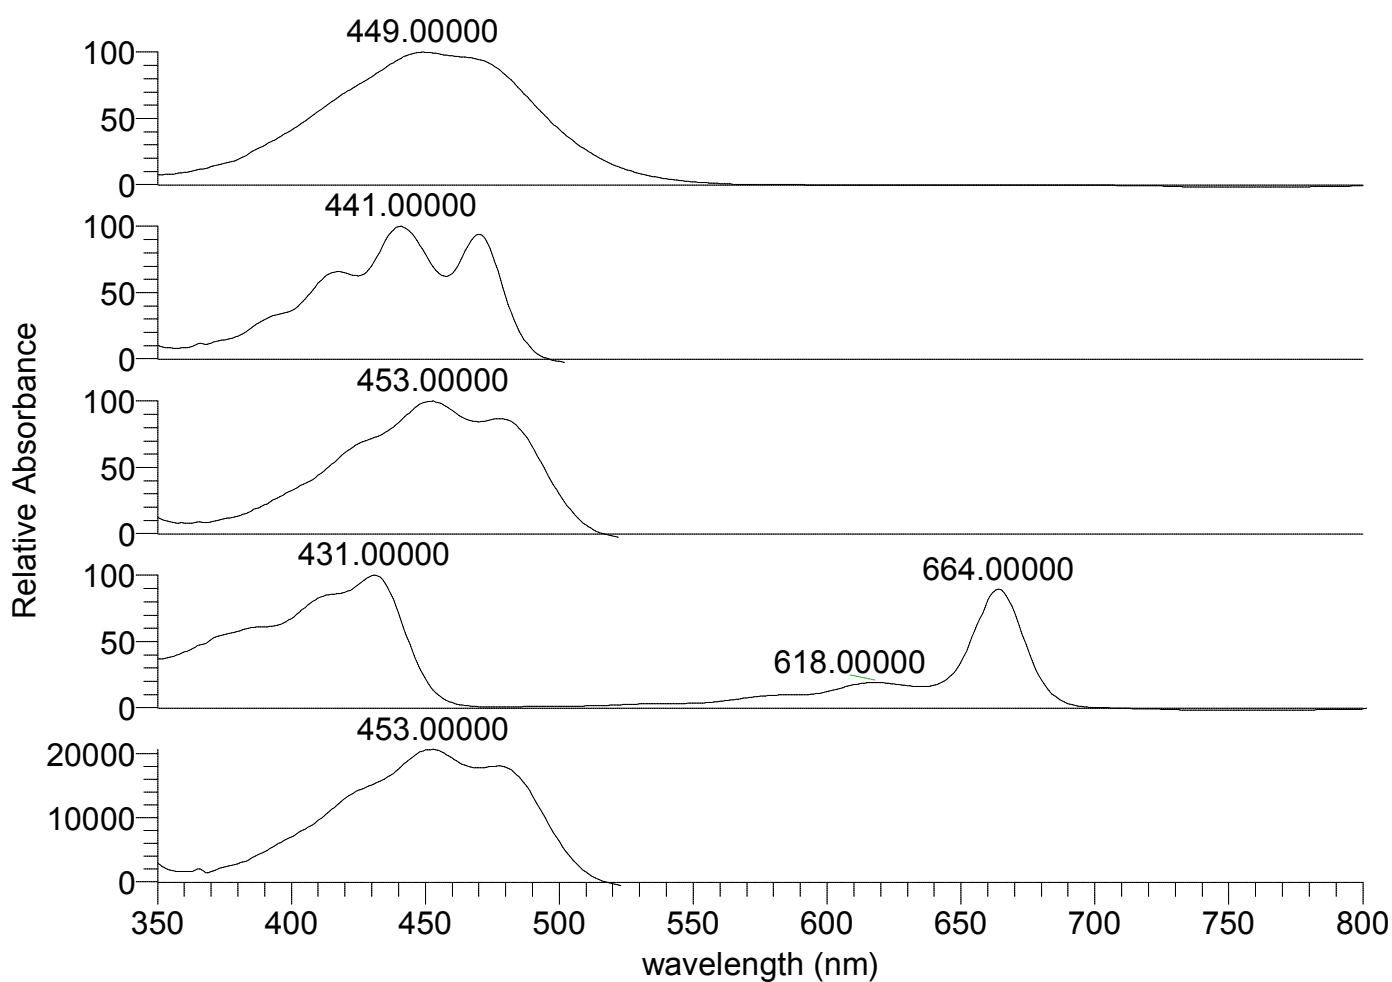

NL:  
2.00E5  
91#6280 RT:  
20.93 AV: 1

NL:  
2.20E4  
91#6574 RT:  
21.91 AV: 1

NL:  
2.03E4  
91#7443 RT:  
24.81 AV: 1

NL:  
2.45E5  
91#10976  
RT: 36.59  
AV: 1

NL:  
2.06E4  
91#13234  
RT: 44.11  
AV: 1

Supplement: Data_Sheet_1.zip [file Muestra91_HPLC-UV.pdf › Carotenoids/Muestra91_HPLC-UV.pdf]

RT: 0.00 - 61.20

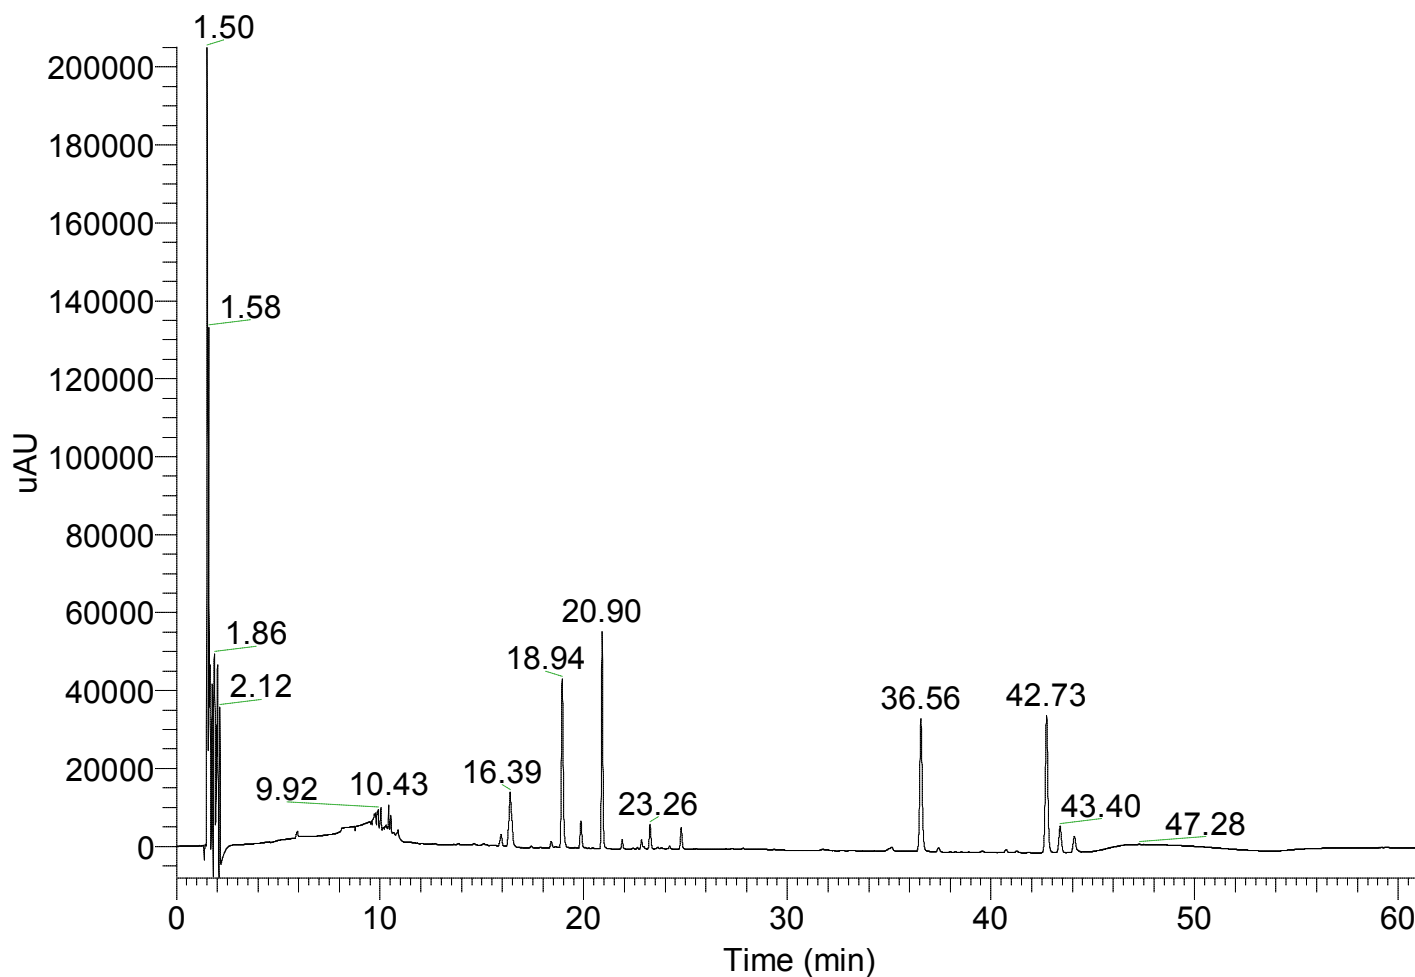

NL:  
2.05E5  
Total Scan  
PDA 92

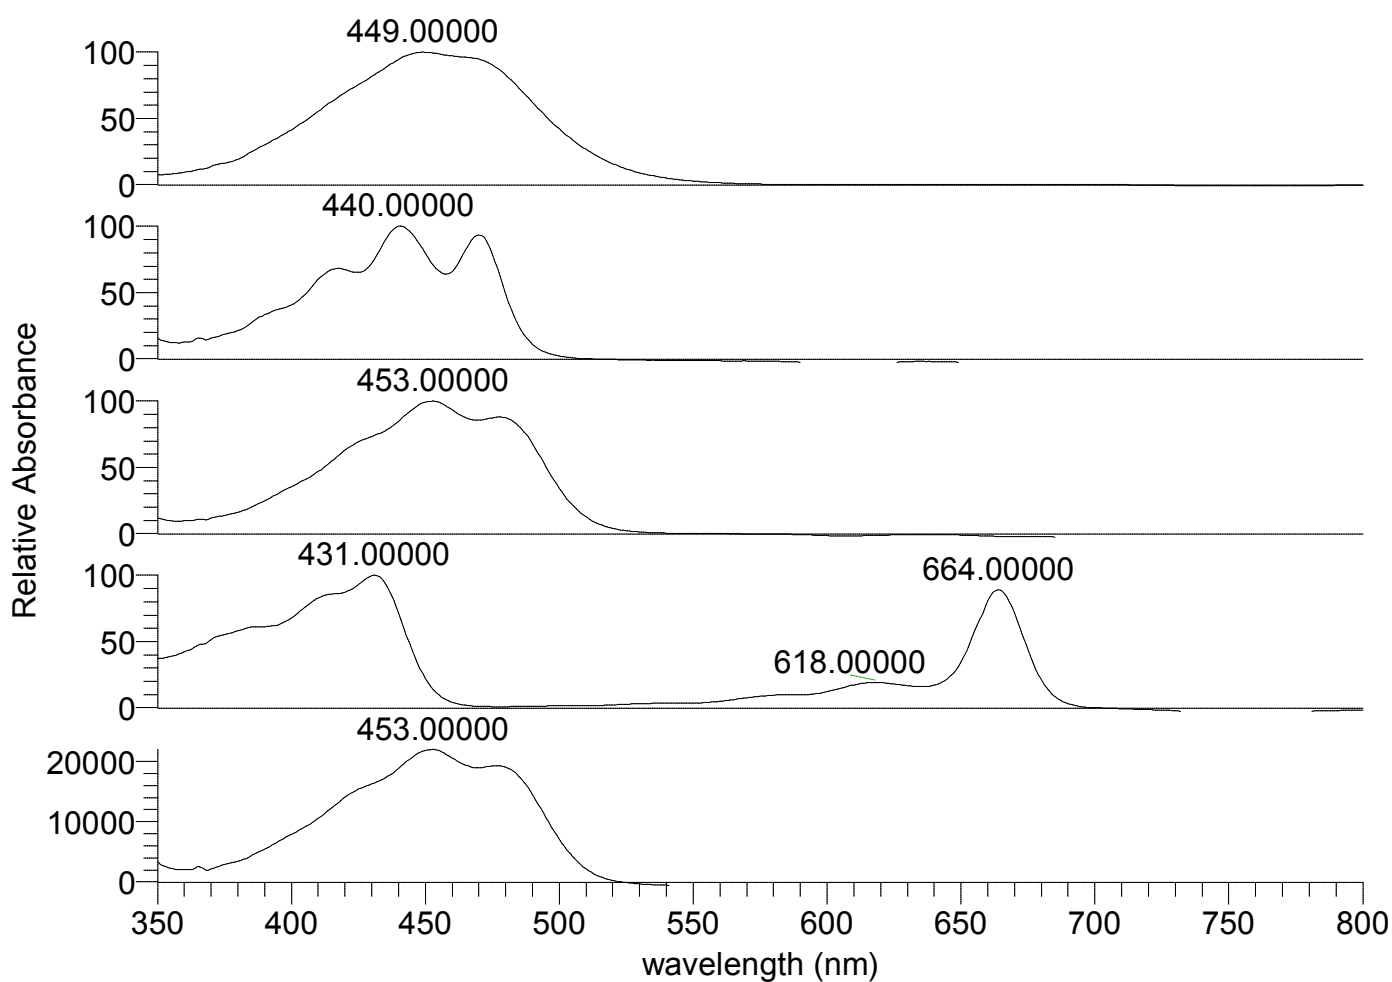

NL:  
2.62E5  
92#6270 RT:  
20.90 AV: 1

NL:  
1.57E4  
92#6567 RT:  
21.89 AV: 1

NL:  
2.94E4  
92#7437 RT:  
24.79 AV: 1

NL:  
1.49E5  
92#10967  
RT: 36.56  
AV: 1

NL:  
2.20E4  
92#13229  
RT: 44.10  
AV: 1

Supplement: Data_Sheet_1.zip [file Muestra92_HPLC-UV.pdf › Carotenoids/Muestra92_HPLC-UV.pdf]

RT: 0.00 - 61.20

NL:  
2.03E5  
Total Scan  
PDA 93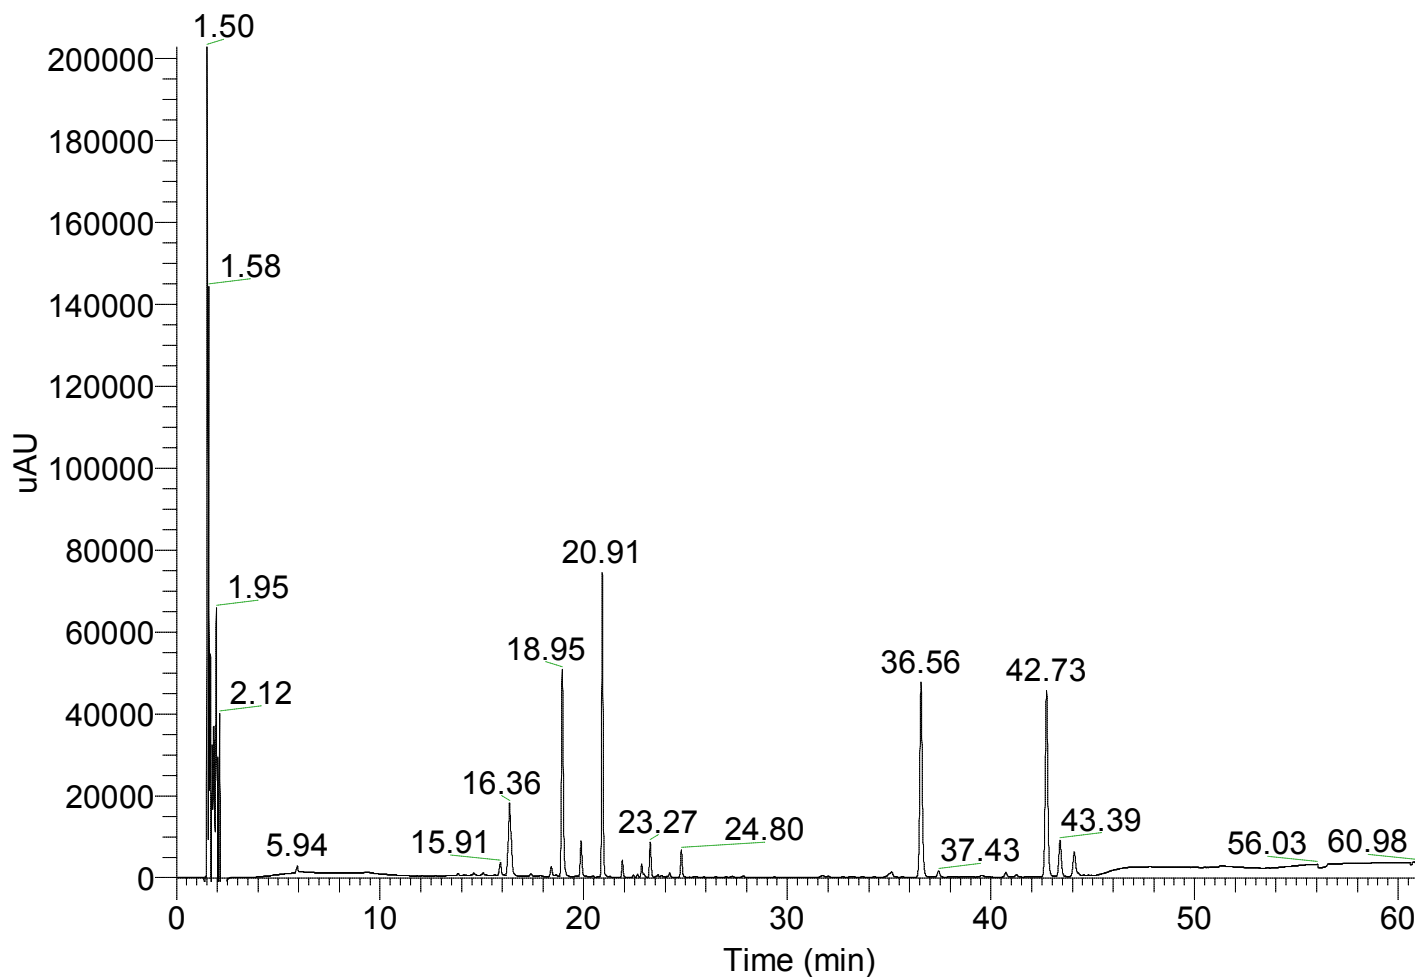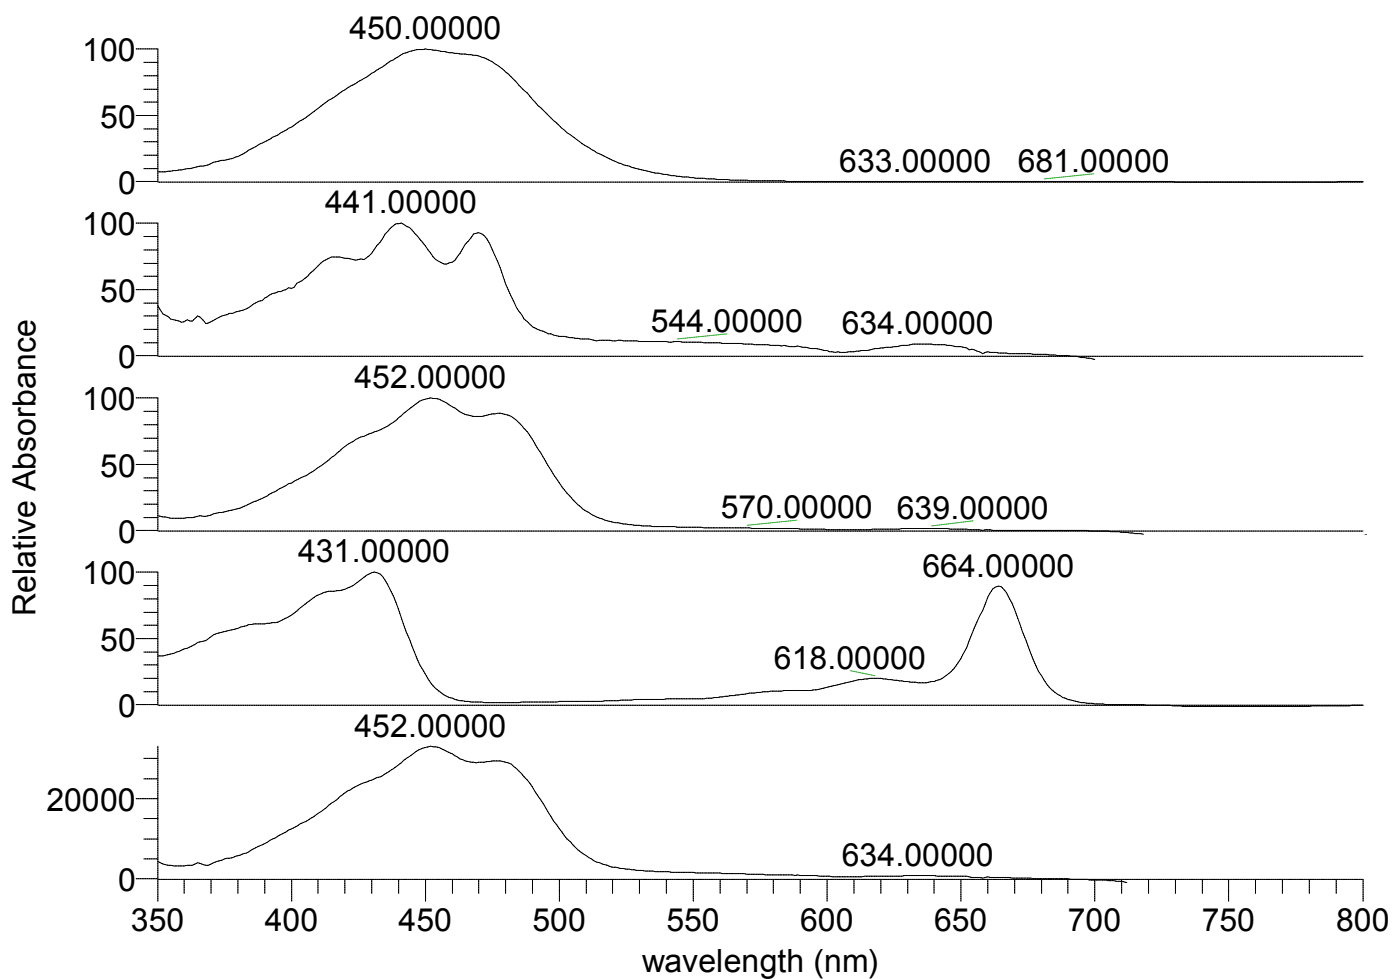NL:  
3.50E5  
93#6274 RT:  
20.91 AV: 1NL:  
5.91E3  
93#6554 RT:  
21.85 AV: 1NL:  
3.62E4  
93#7440 RT:  
24.80 AV: 1NL:  
2.10E5  
93#10968  
RT: 36.56  
AV: 1NL:  
3.30E4  
93#13228  
RT: 44.09  
AV: 1

Supplement: Data_Sheet_1.zip [file Muestra93_HPLC-UV.pdf › Carotenoids/Muestra93_HPLC-UV.pdf]

RT: 0.00 - 61.20

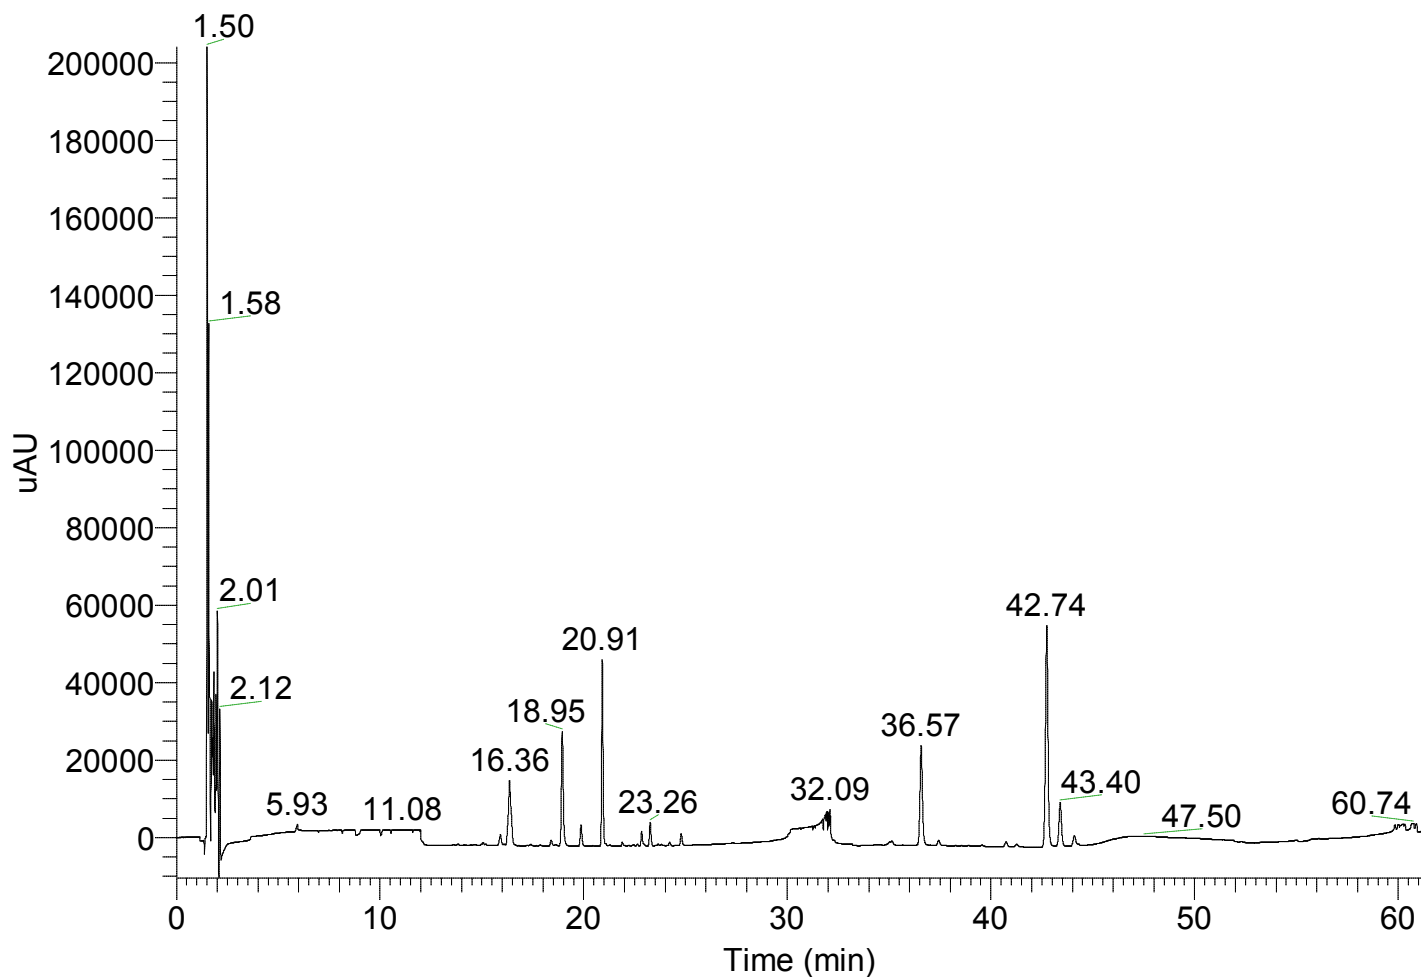

NL:  
2.04E5  
Total Scan  
PDA 94

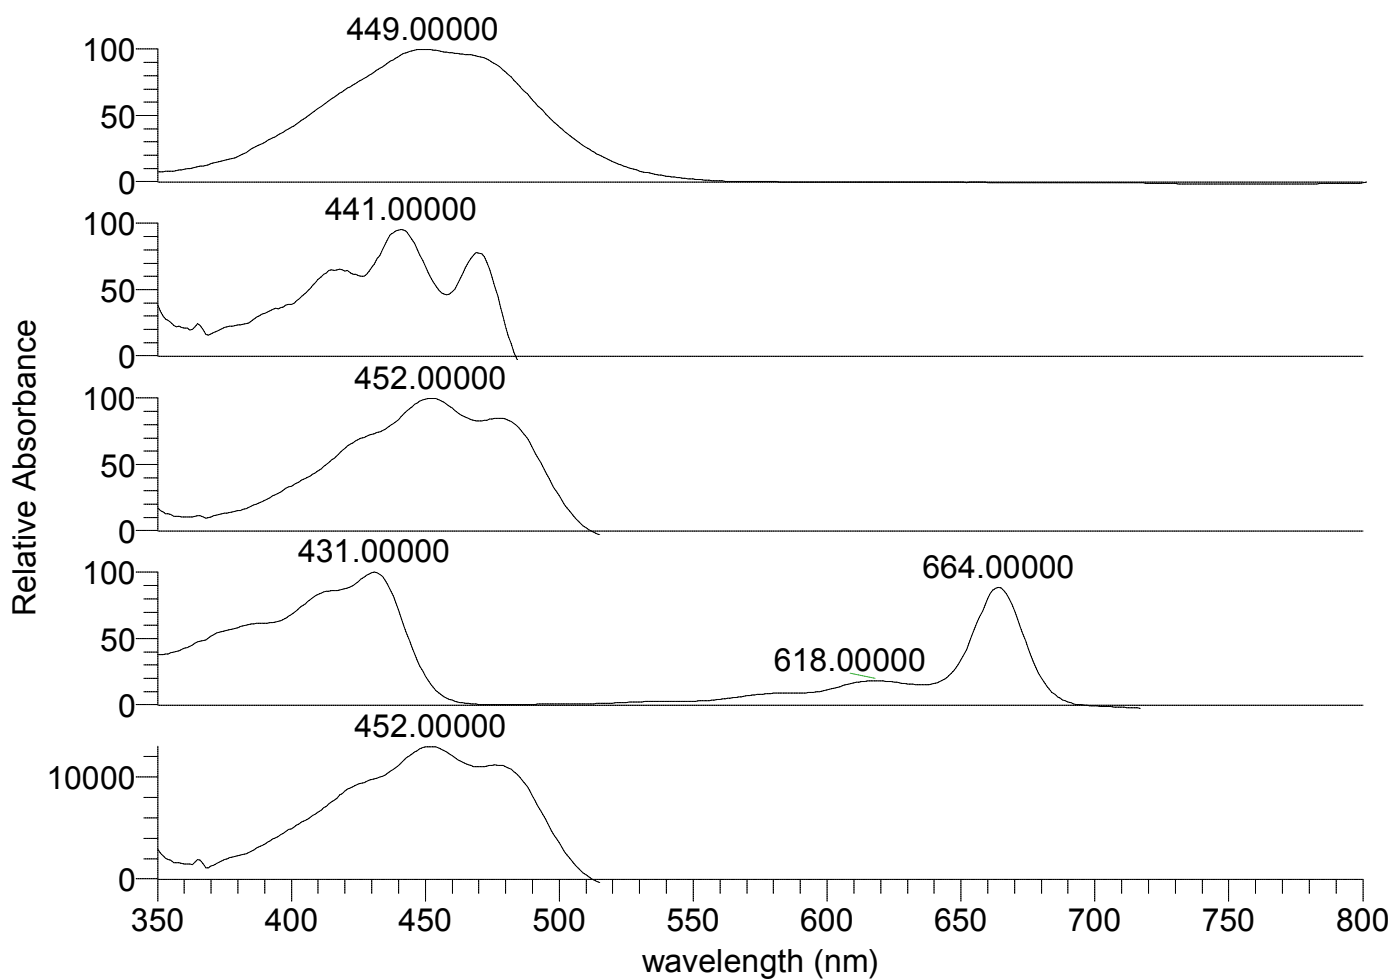

NL:  
2.23E5  
94#6272 RT:  
20.91 AV: 1

NL:  
5.10E3  
94#6569 RT:  
21.90 AV: 1

NL:  
1.49E4  
94#7438 RT:  
24.79 AV: 1

NL:  
1.12E5  
94#10971  
RT: 36.57  
AV: 1

NL:  
1.30E4  
94#13227  
RT: 44.09  
AV: 1

Supplement: Data_Sheet_1.zip [file Muestra94_HPLC-UV.pdf › Carotenoids/Muestra94_HPLC-UV.pdf]

RT: 0.00 - 61.20

NL:  
2.09E5  
Total Scan  
PDA 95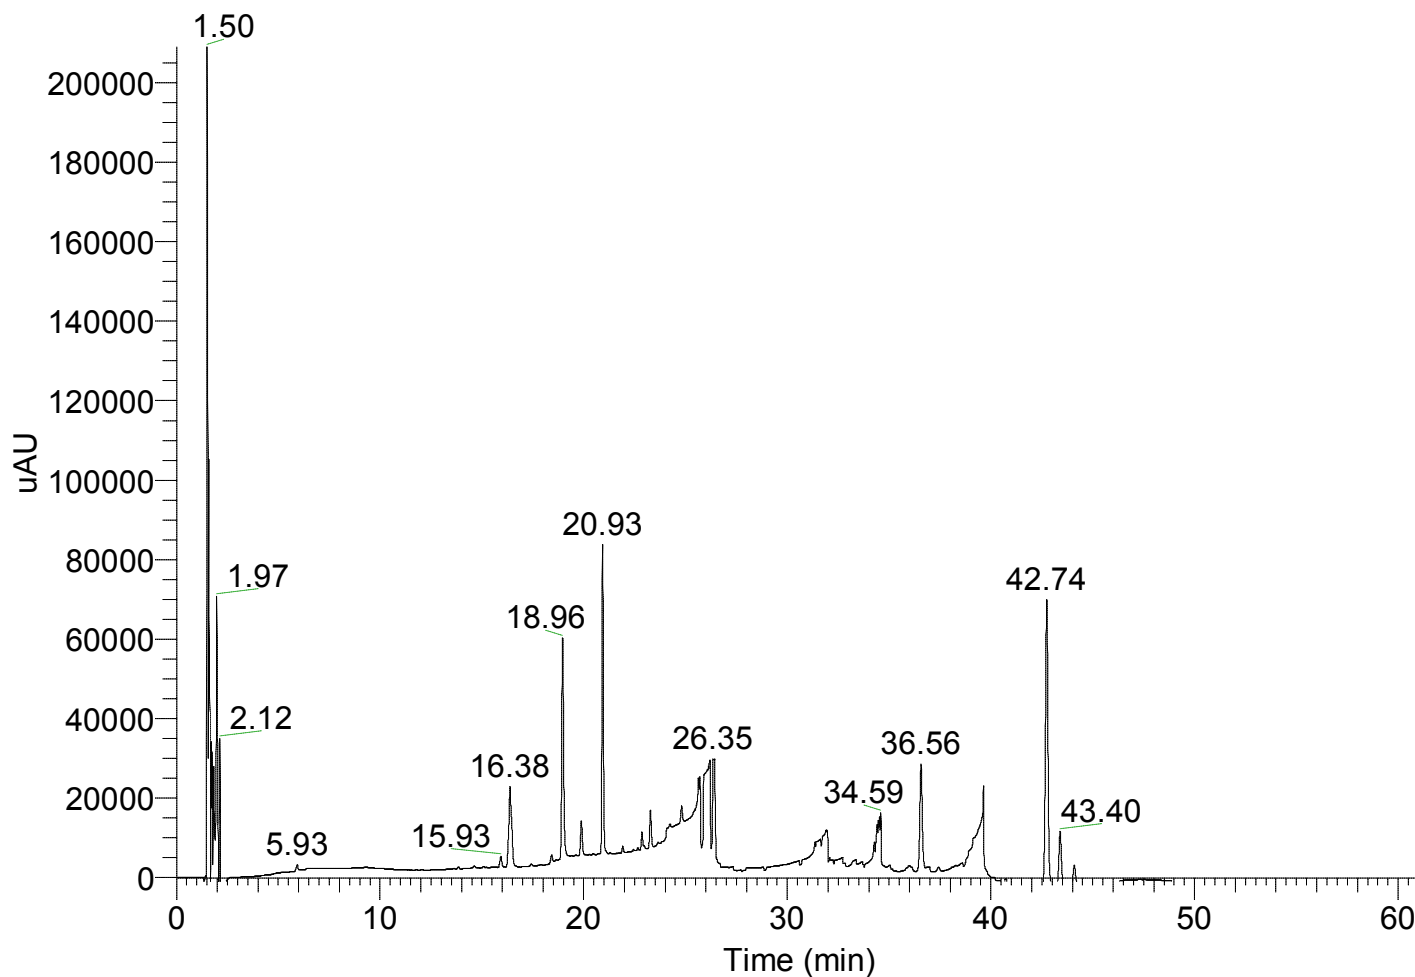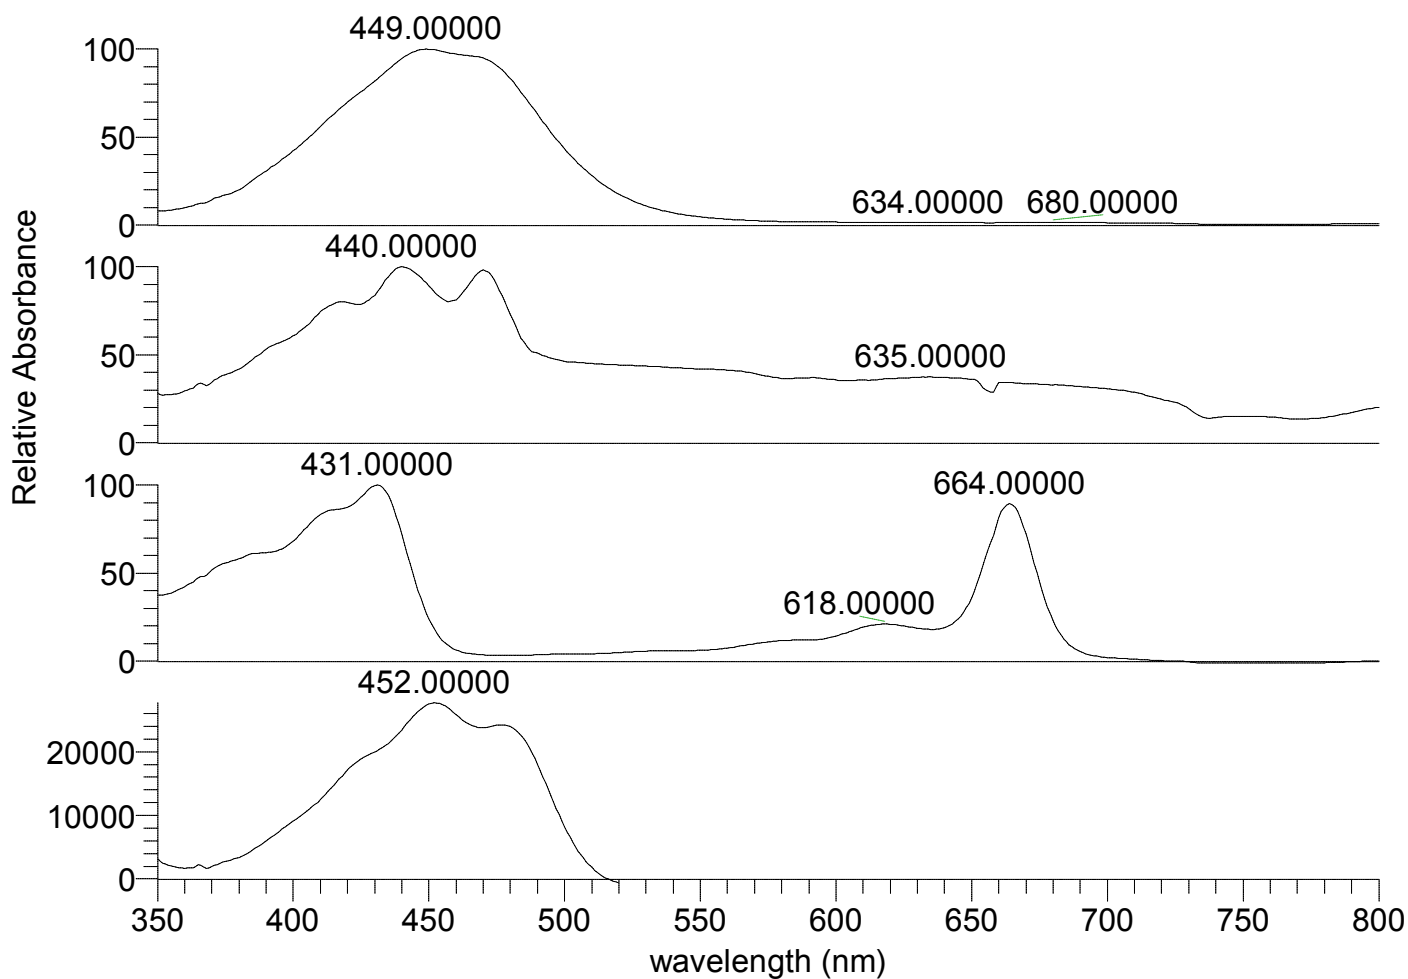

Supplement: Data_Sheet_1.zip [file Muestra95_HPLC-UV.pdf › Carotenoids/Muestra95_HPLC-UV.pdf]

RT: 0.00 - 61.20

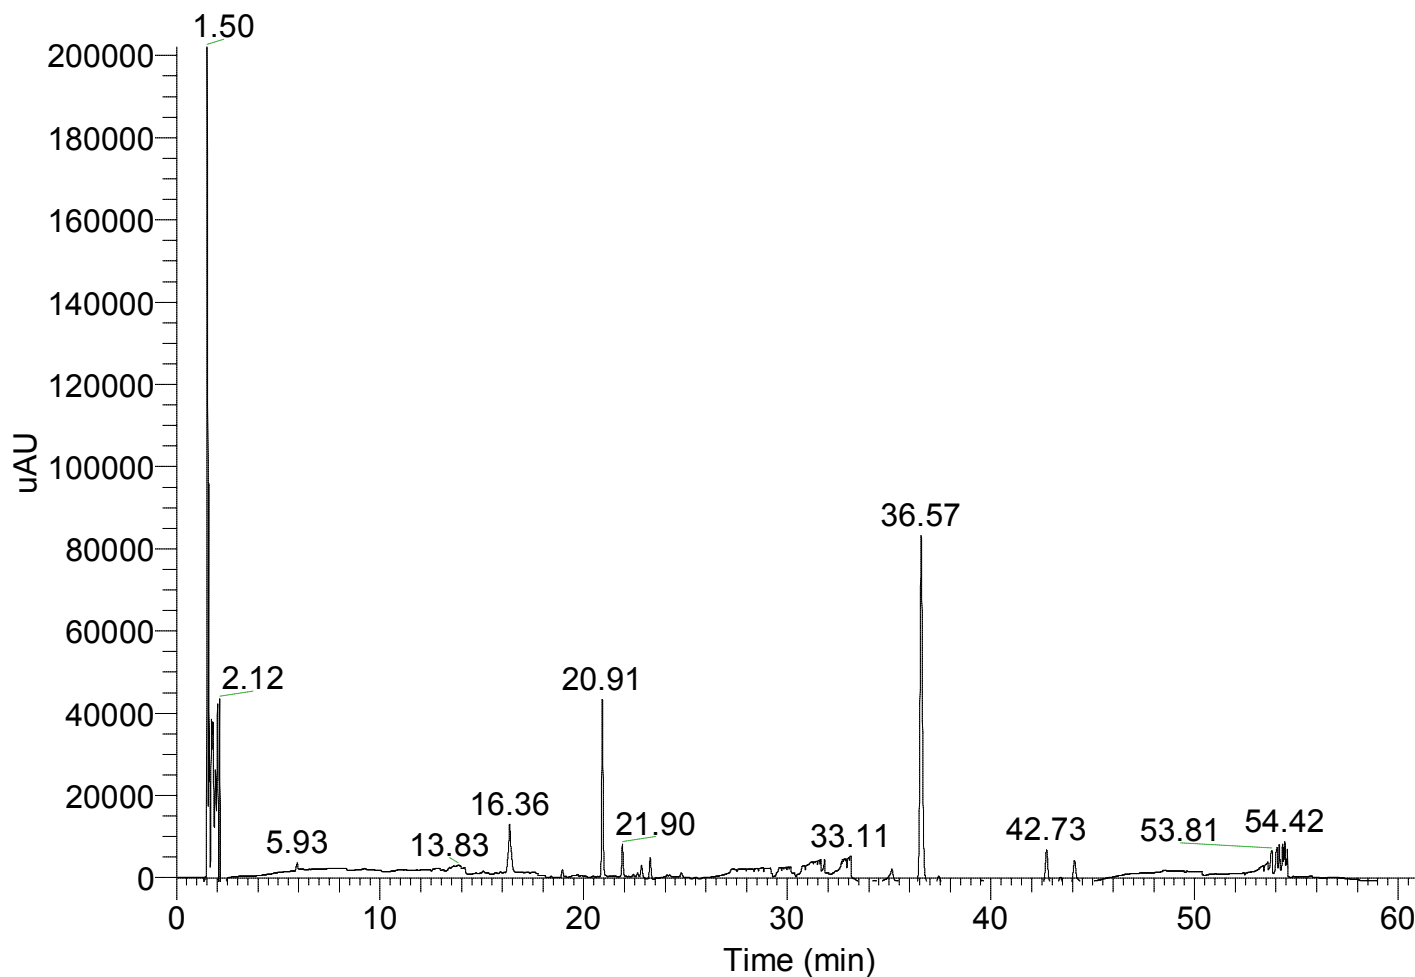

NL:  
2.02E5  
Total Scan  
PDA 96

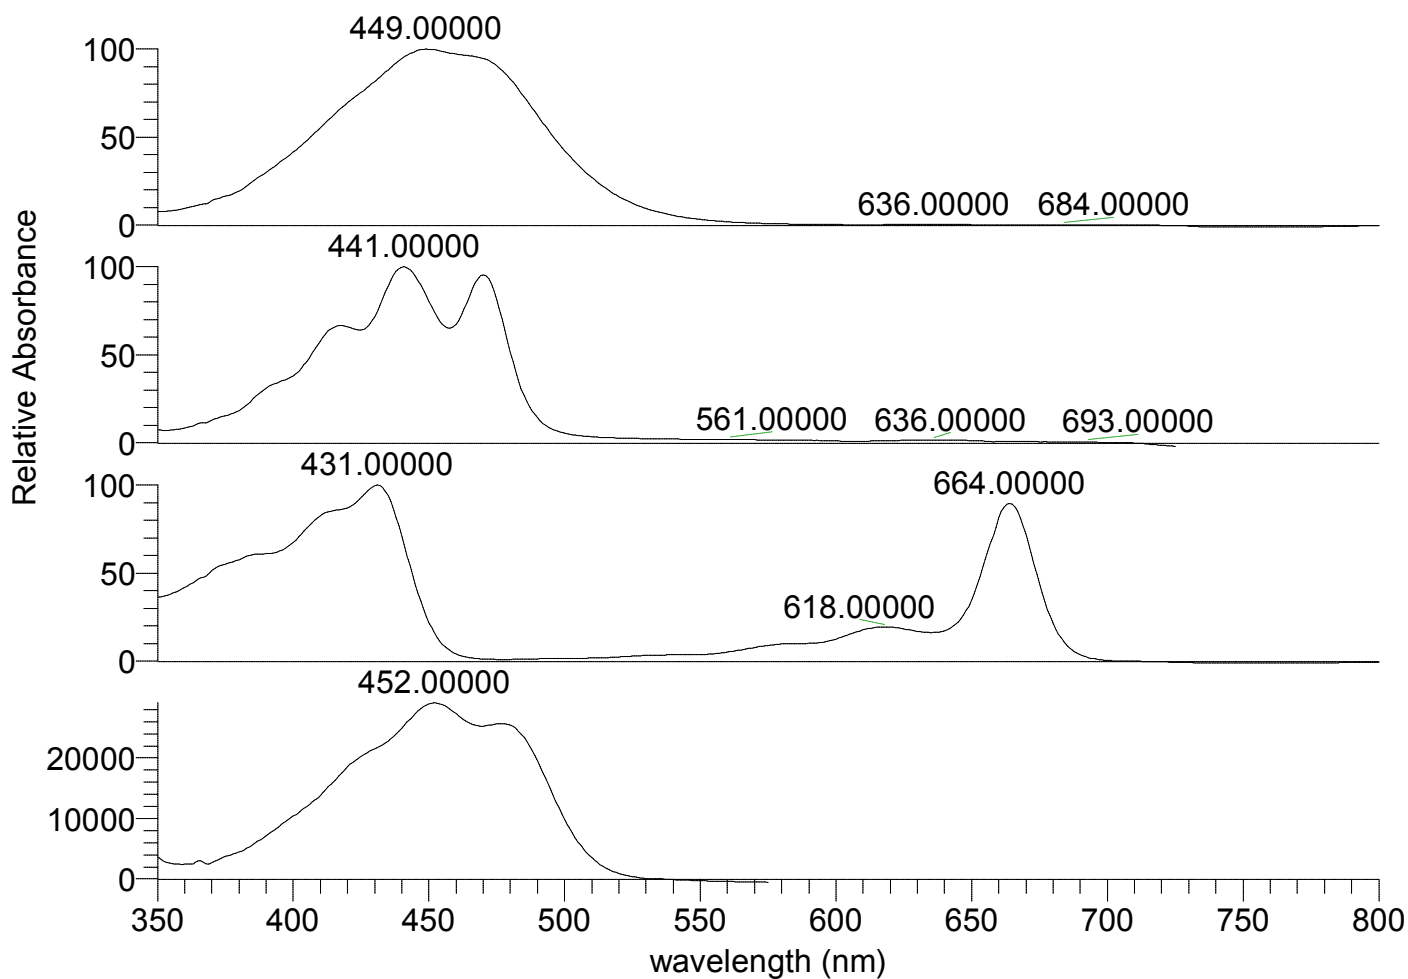

NL:  
2.03E5  
96#6274  
RT: 20.91  
AV: 1

NL:  
5.07E4  
96#6570  
RT: 21.90  
AV: 1

NL:  
3.71E5  
96#10971  
RT: 36.57  
AV: 1

NL:  
2.91E4  
96#13231  
RT: 44.10  
AV: 1

Supplement: Data_Sheet_1.zip [file Muestra96_HPLC-UV.pdf › Carotenoids/Muestra96_HPLC-UV.pdf]

RT: 0.00 - 61.20

NL:  
2.07E5  
Total Scan  
PDA 97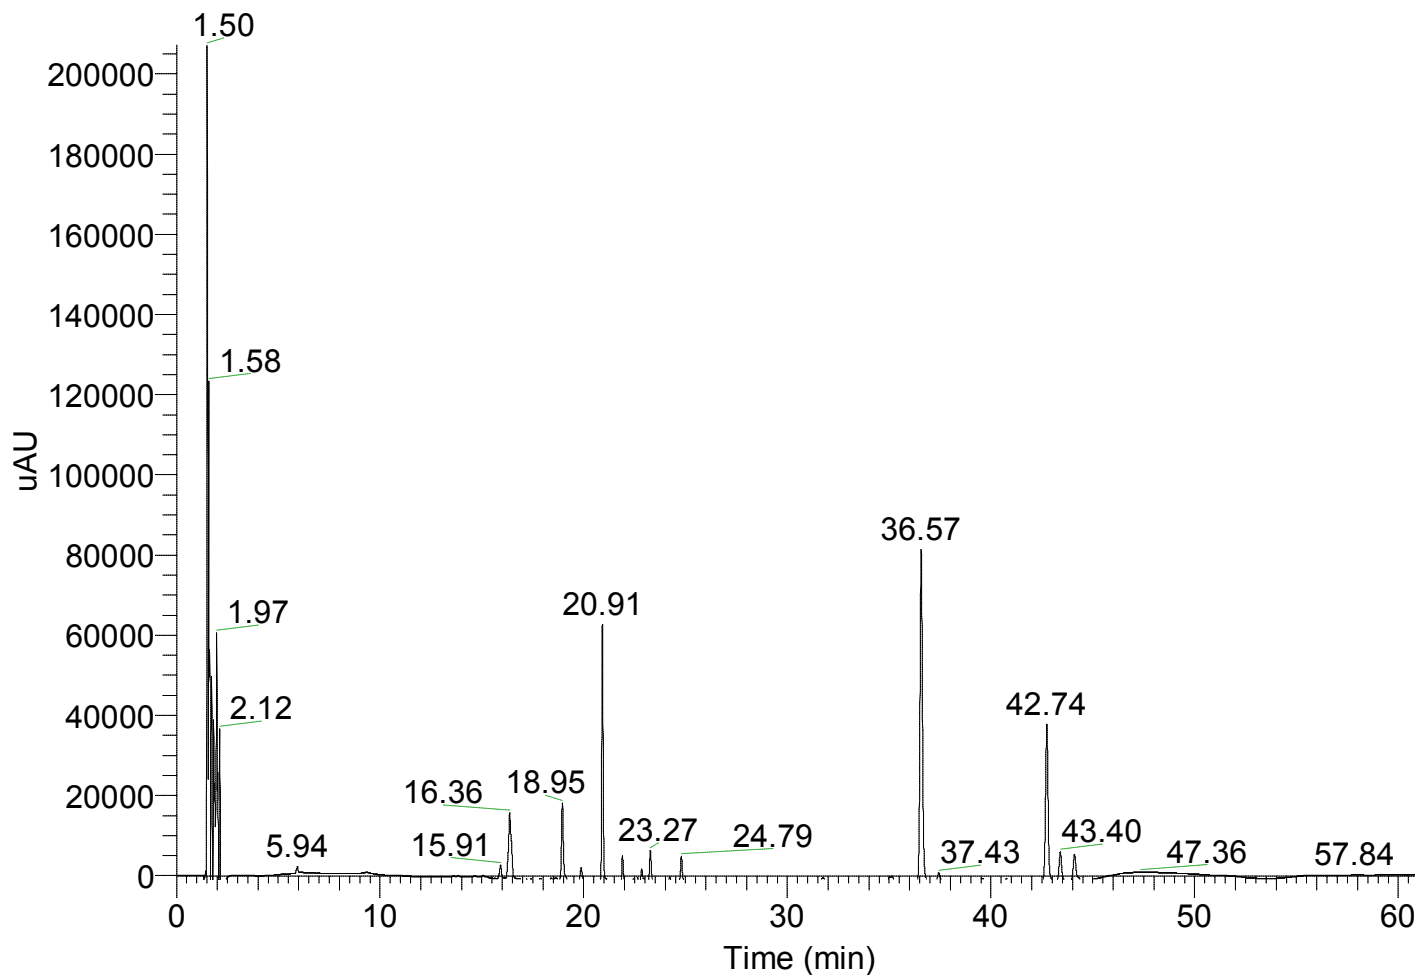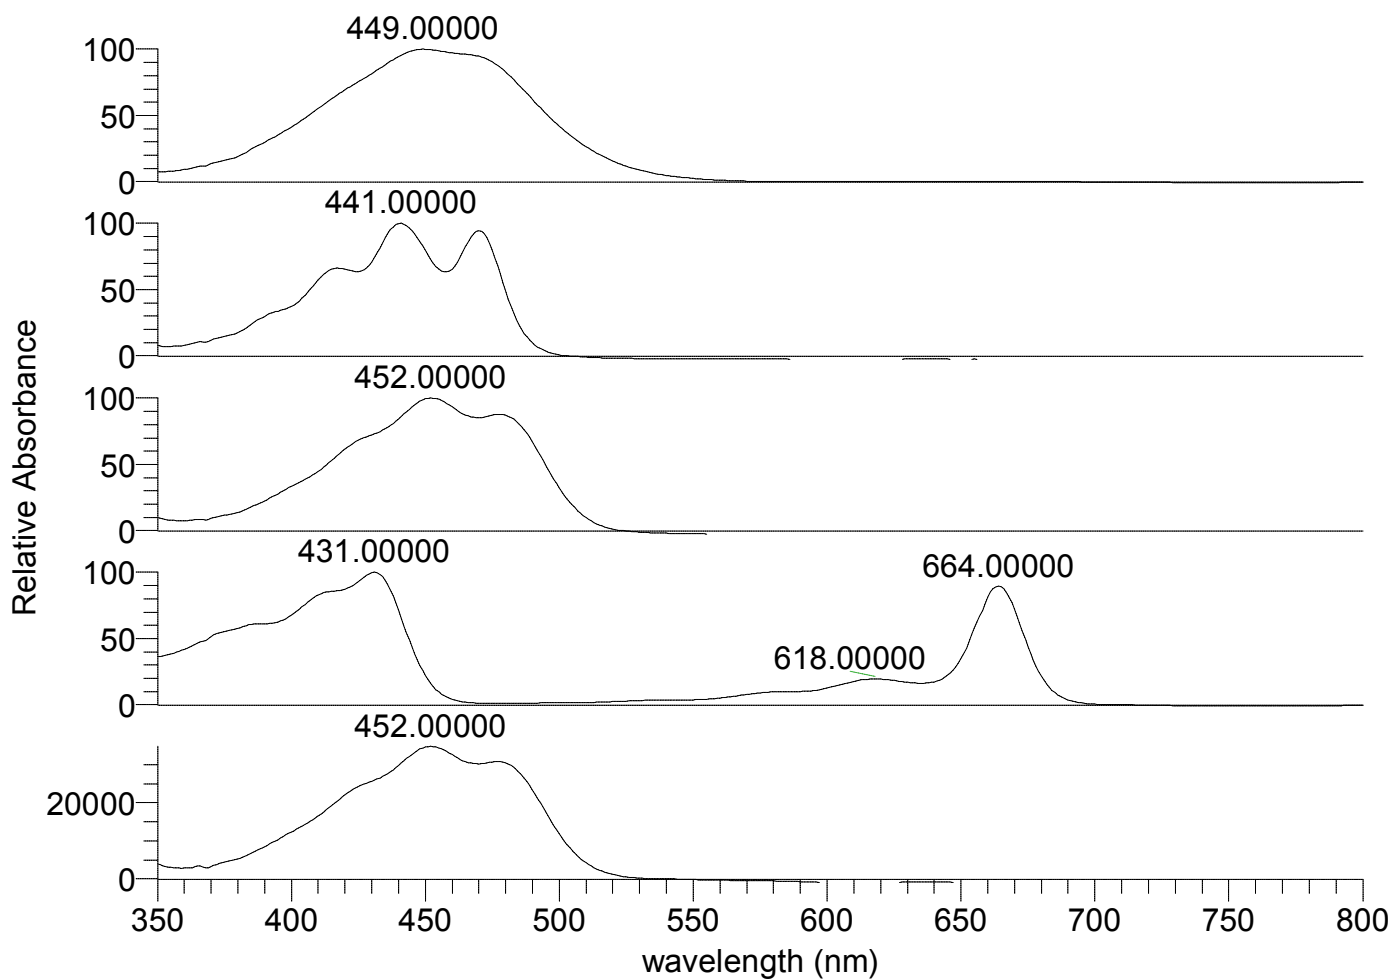NL:  
2.98E5  
97#6273 RT:  
20.91 AV: 1NL:  
4.04E4  
97#6570 RT:  
21.90 AV: 1NL:  
3.32E4  
97#7437 RT:  
24.79 AV: 1NL:  
3.64E5  
97#10970  
RT: 36.57  
AV: 1NL:  
3.47E4  
97#13230  
RT: 44.10  
AV: 1

Supplement: Data_Sheet_1.zip [file Muestra97_HPLC-UV.pdf › Carotenoids/Muestra97_HPLC-UV.pdf]

RT: 0.00 - 61.20

NL:  
2.07E5  
Total Scan  
PDA 98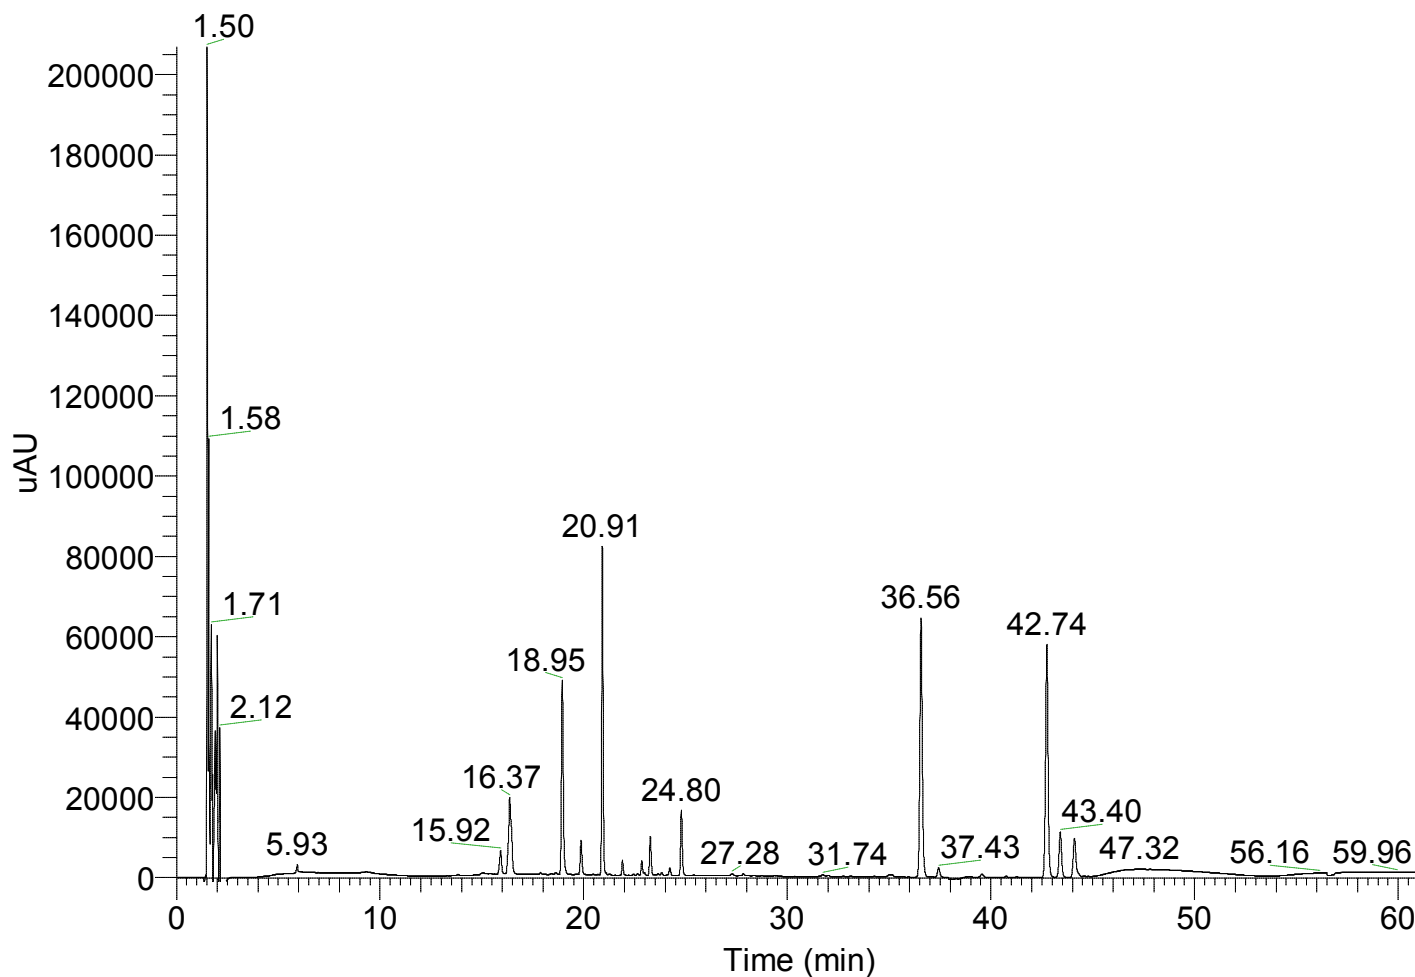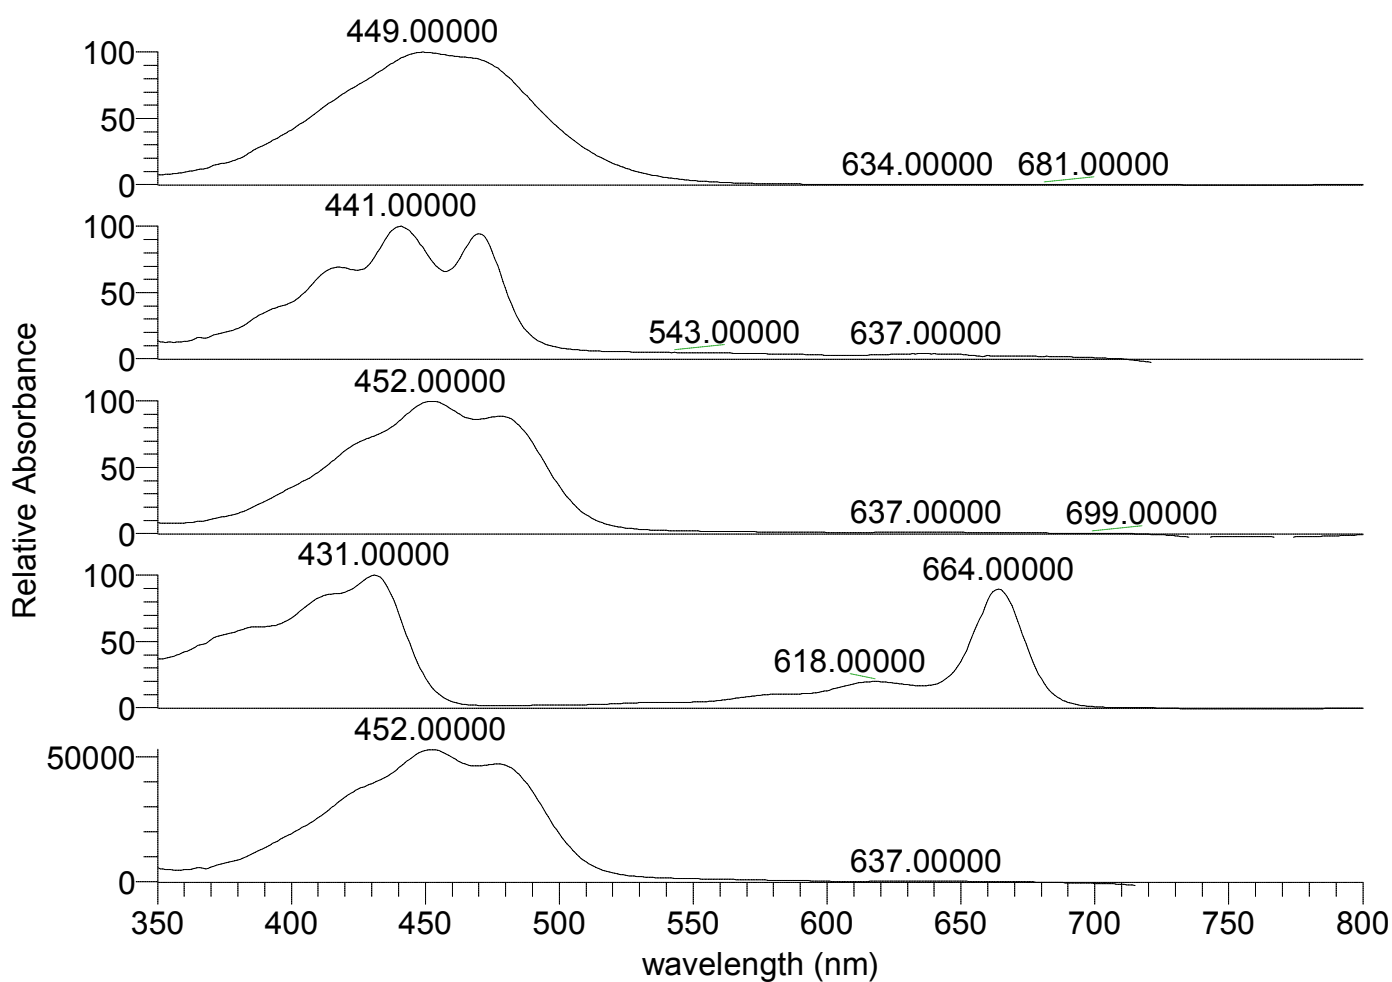NL:  
3.83E5  
98#6273 RT:  
20.91 AV: 1NL:  
2.53E4  
98#6571 RT:  
21.90 AV: 1NL:  
8.86E4  
98#7439 RT:  
24.80 AV: 1NL:  
2.84E5  
98#10968  
RT: 36.56  
AV: 1NL:  
5.29E4  
98#13229  
RT: 44.10  
AV: 1

Supplement: Data_Sheet_1.zip [file Muestra98_HPLC-UV.pdf › Carotenoids/Muestra98_HPLC-UV.pdf]

RT: 0.00 - 61.20

NL:  
1.97E5  
Total Scan  
PDA 99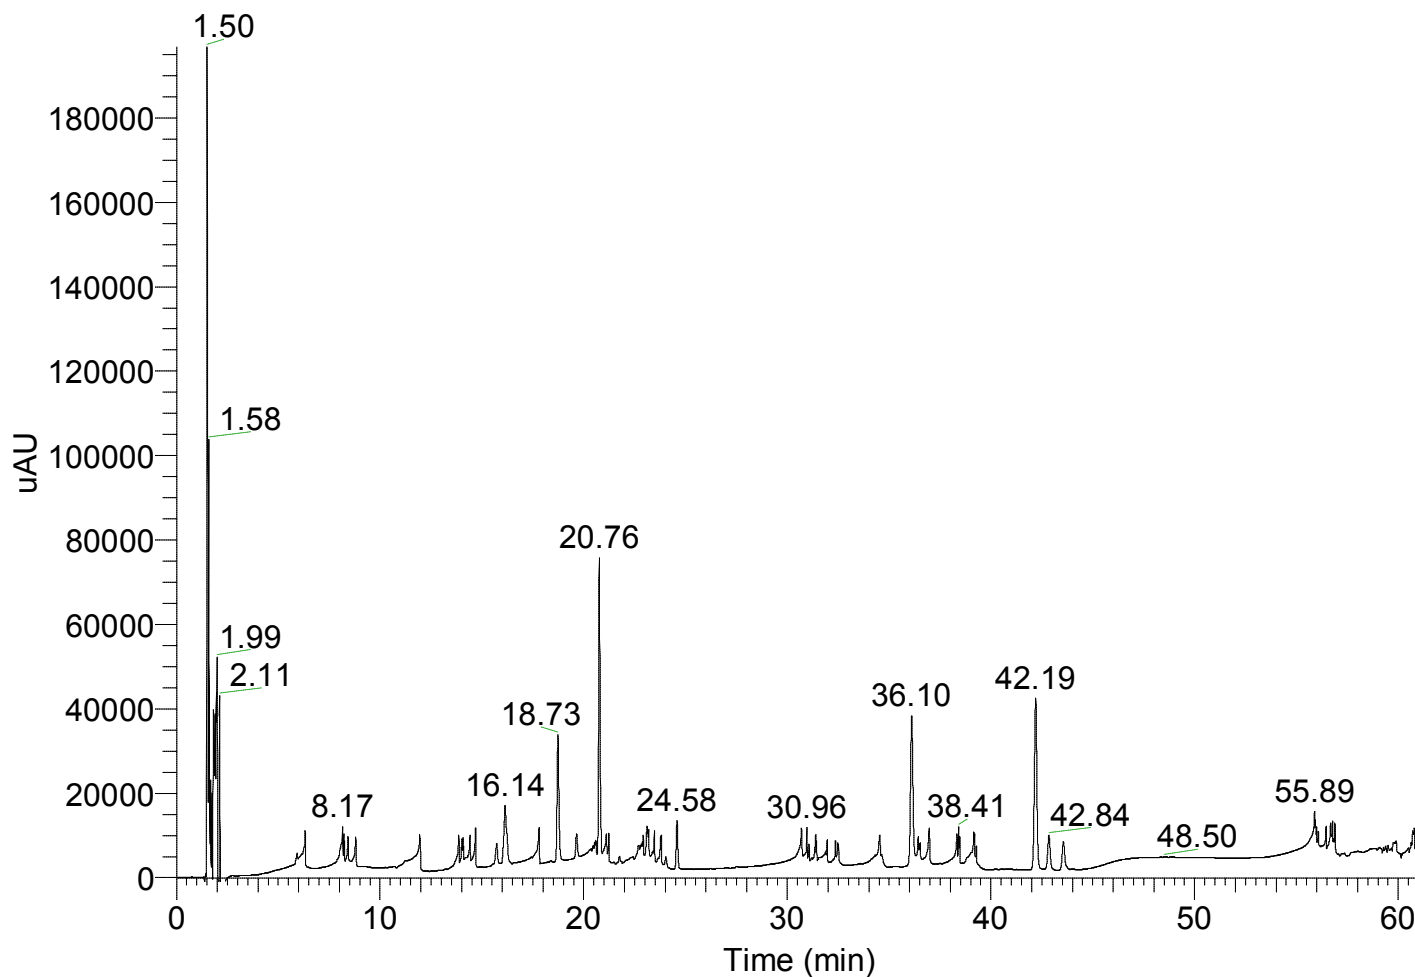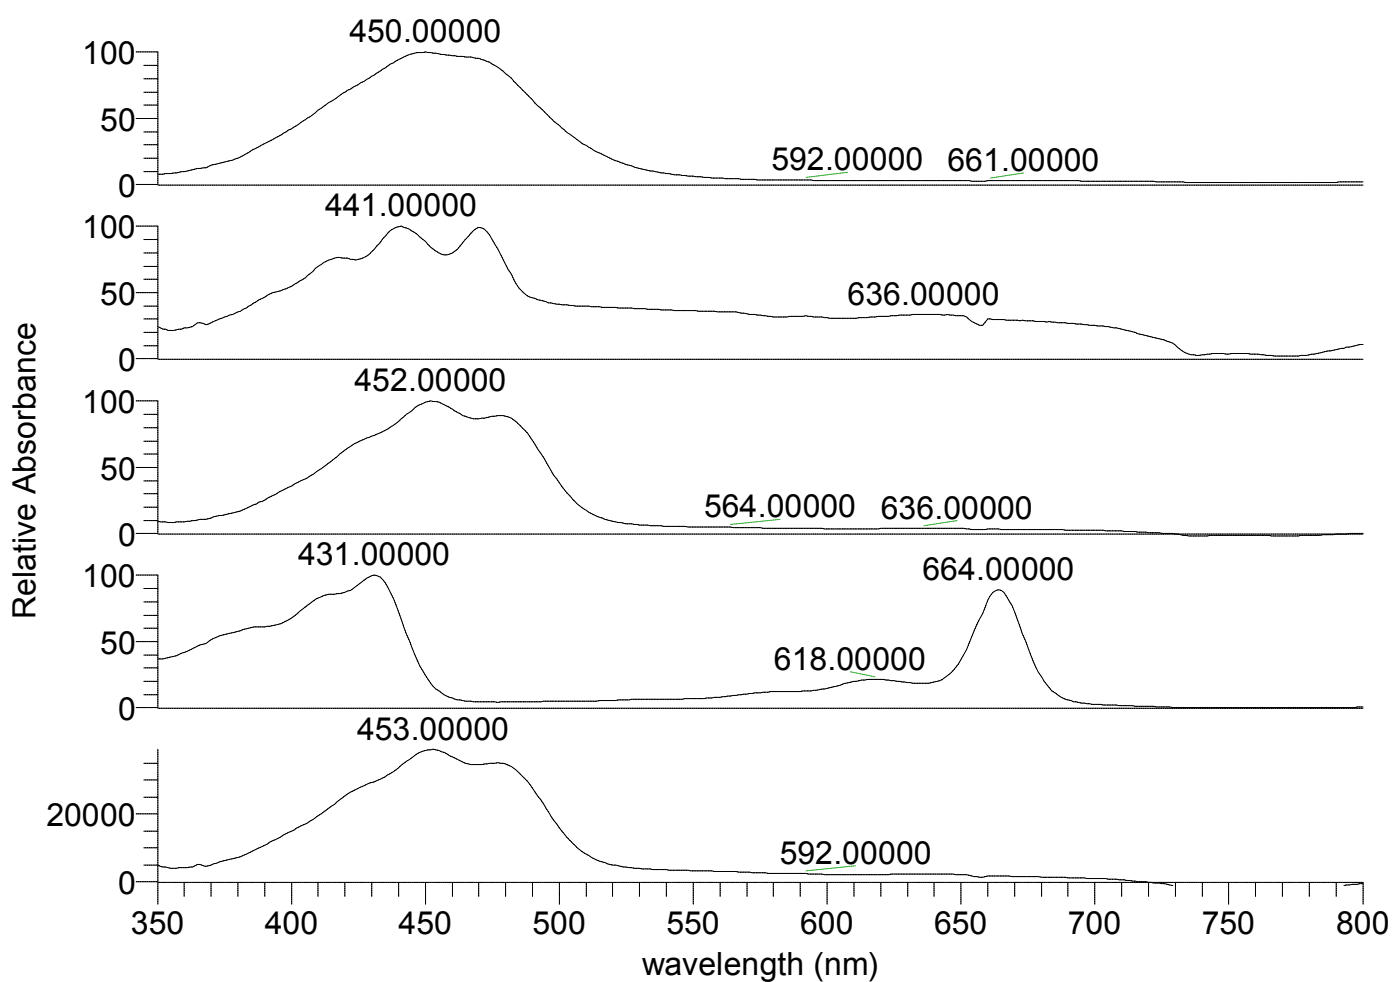NL:  
3.24E5  
99#6229 RT:  
20.76 AV: 1NL:  
1.34E4  
99#6524 RT:  
21.75 AV: 1NL:  
6.51E4  
99#7373 RT:  
24.58 AV: 1NL:  
1.58E5  
99#10829  
RT: 36.10  
AV: 1NL:  
3.90E4  
99#13067  
RT: 43.56  
AV: 1

Supplement: Data_Sheet_1.zip [file Muestra99_HPLC-UV.pdf › Carotenoids/Muestra99_HPLC-UV.pdf]

RT: 13.63 - 44.77 SM: 7B

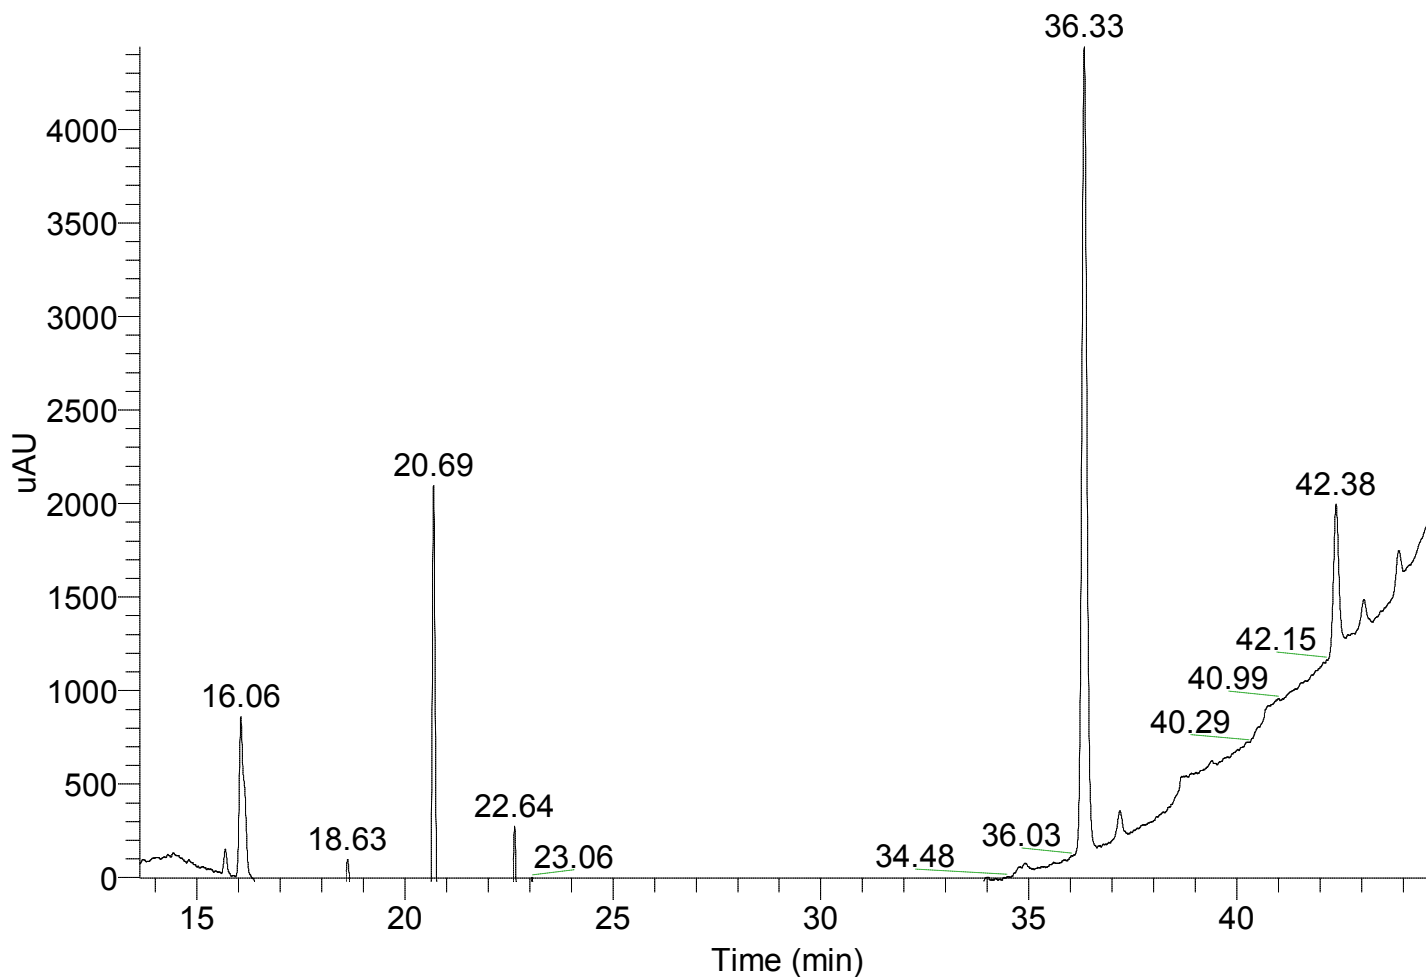

NL:  
4.44E3  
Total Scan  
PDA 9

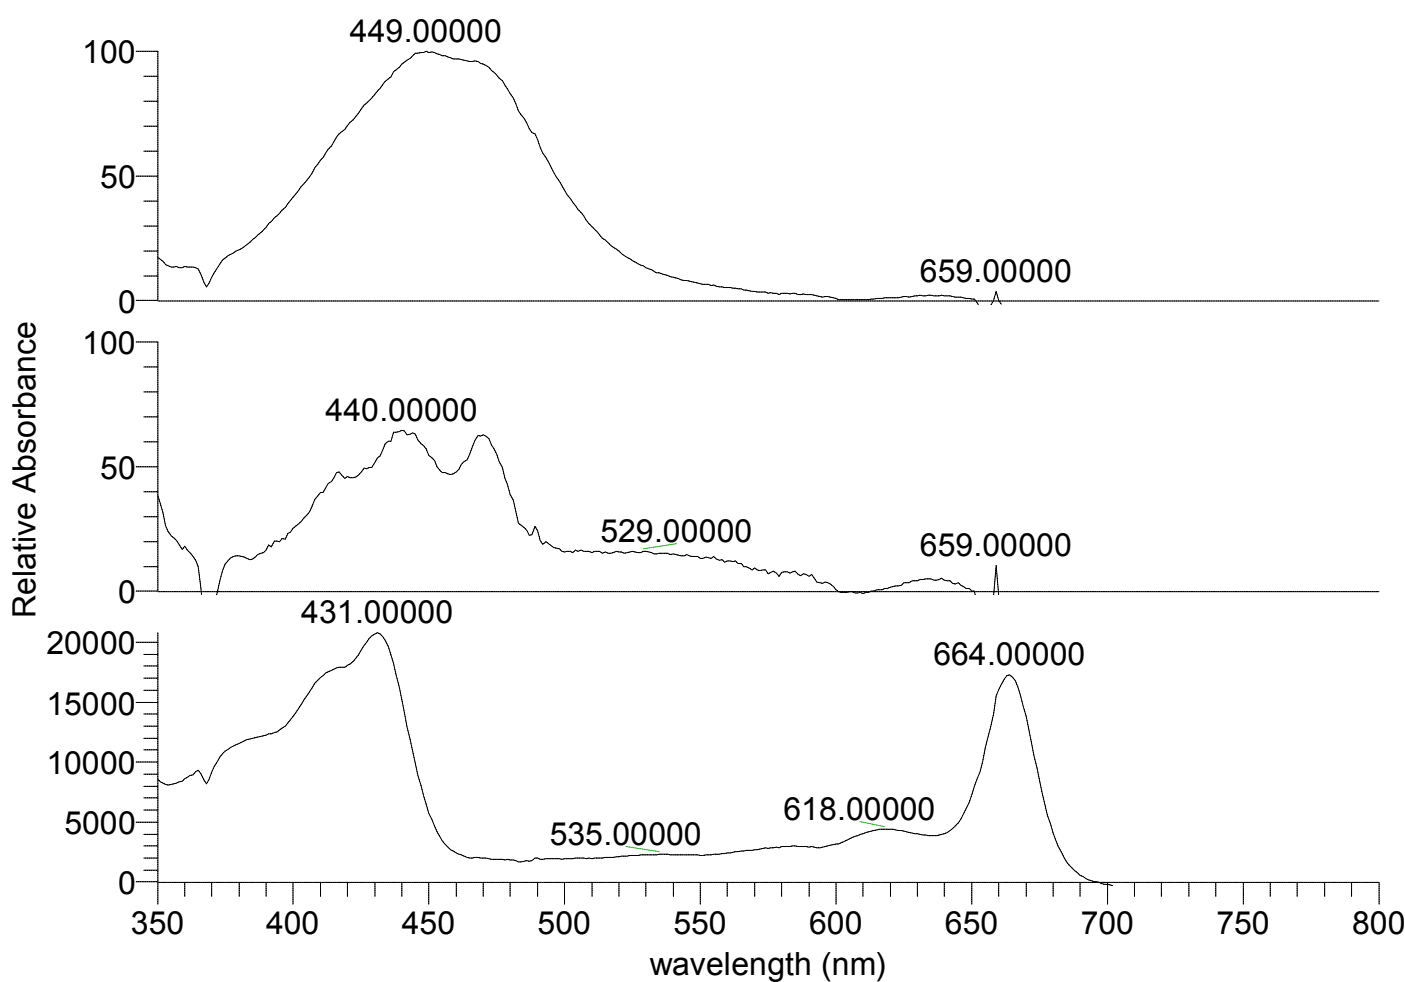

NL:  
1.20E4  
9#6206 RT:  
20.69 AV: 1

NL:  
3.54E3  
9#6500 RT:  
21.67 AV: 1

NL:  
2.08E4  
9#10898  
RT: 36.33  
AV: 1

Supplement: Data_Sheet_1.zip [file Muestra9_HPLC-UV.pdf › Carotenoids/Muestra9_HPLC-UV.pdf]

RT: 9.39 - 47.08

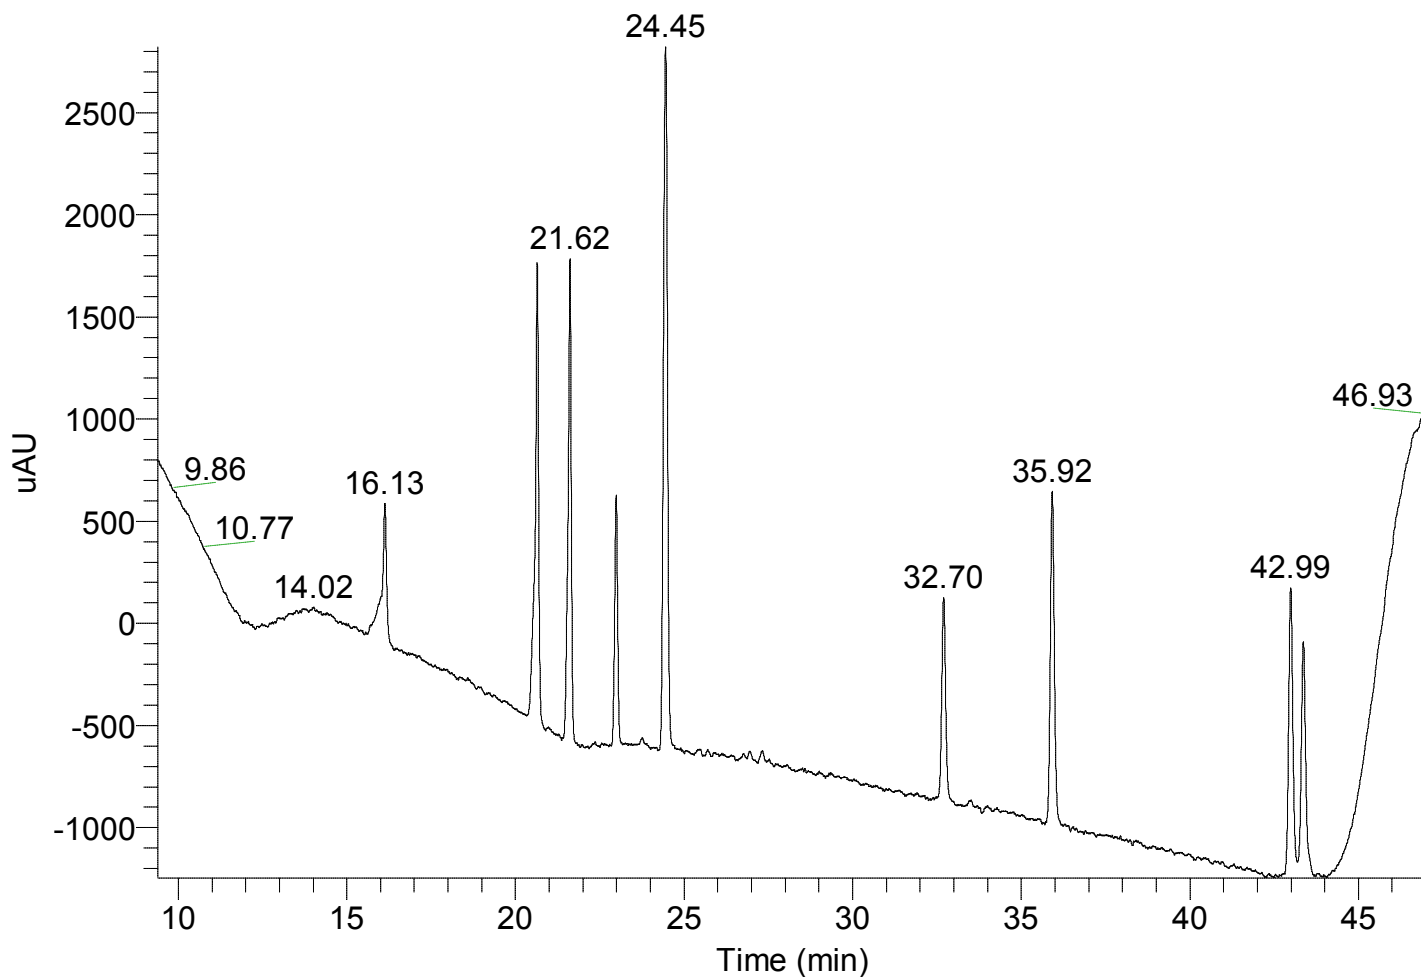

NL:  
2.82E3  
Total Scan  
PDA P4

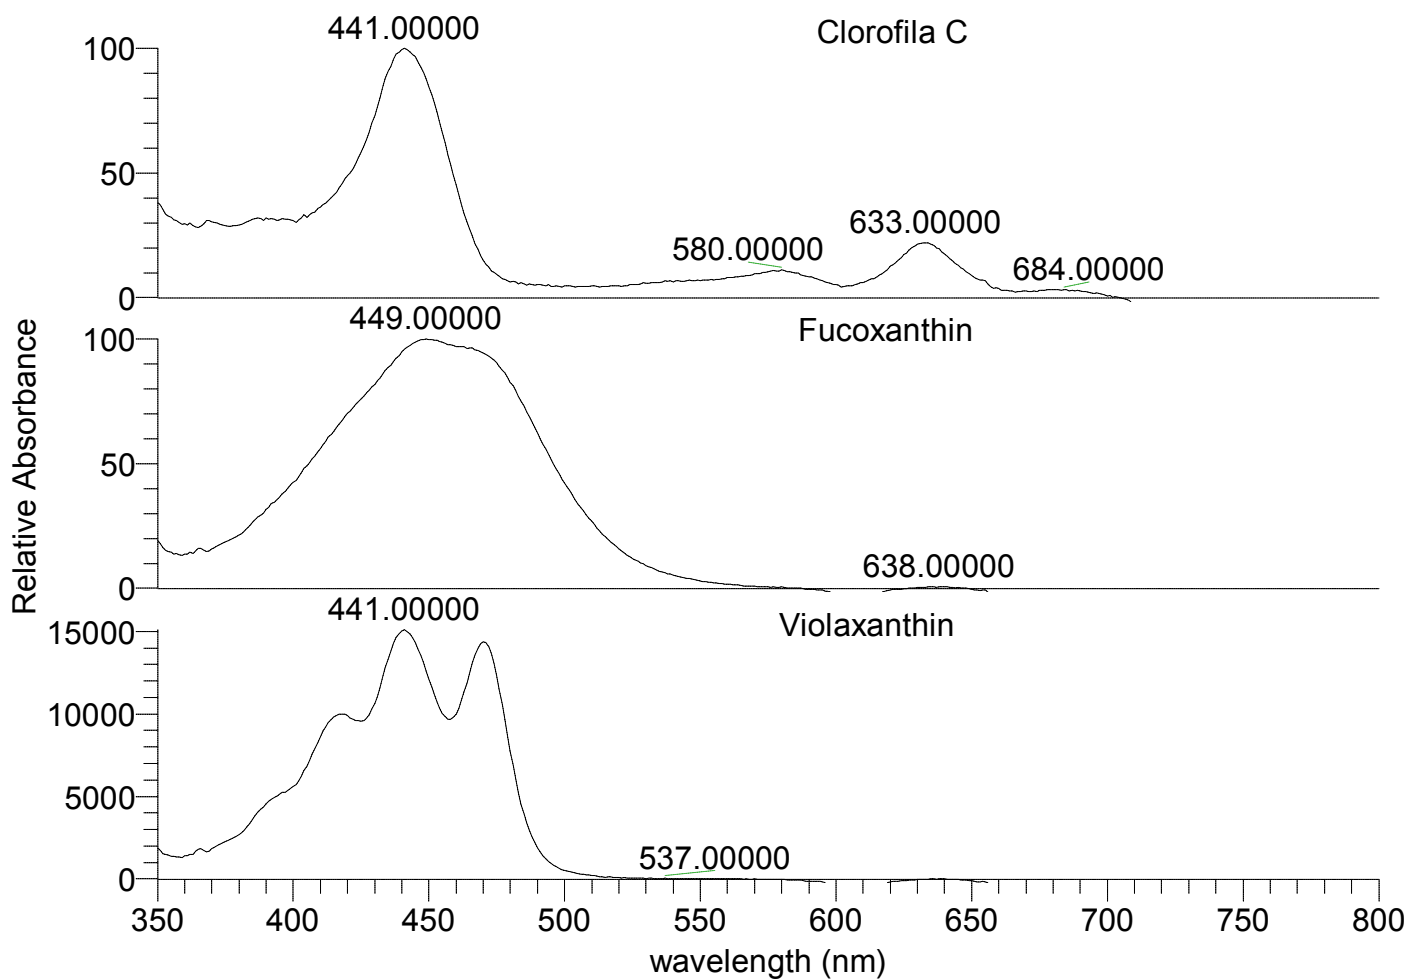

NL:  
5.49E3  
P4#4839  
RT: 16.13  
AV: 1

NL:  
1.04E4  
P4#6196  
RT: 20.65  
AV: 1

NL:  
1.51E4  
P4#6485  
RT: 21.62  
AV: 1

Supplement: Data_Sheet_1.zip [file P4_HPLC-UV_1.pdf › Carotenoids/Patrons/P4_HPLC-UV_1.pdf]

RT: 9.39 - 47.08



NL:  
2.82E3  
Total Scan  
PDA P4

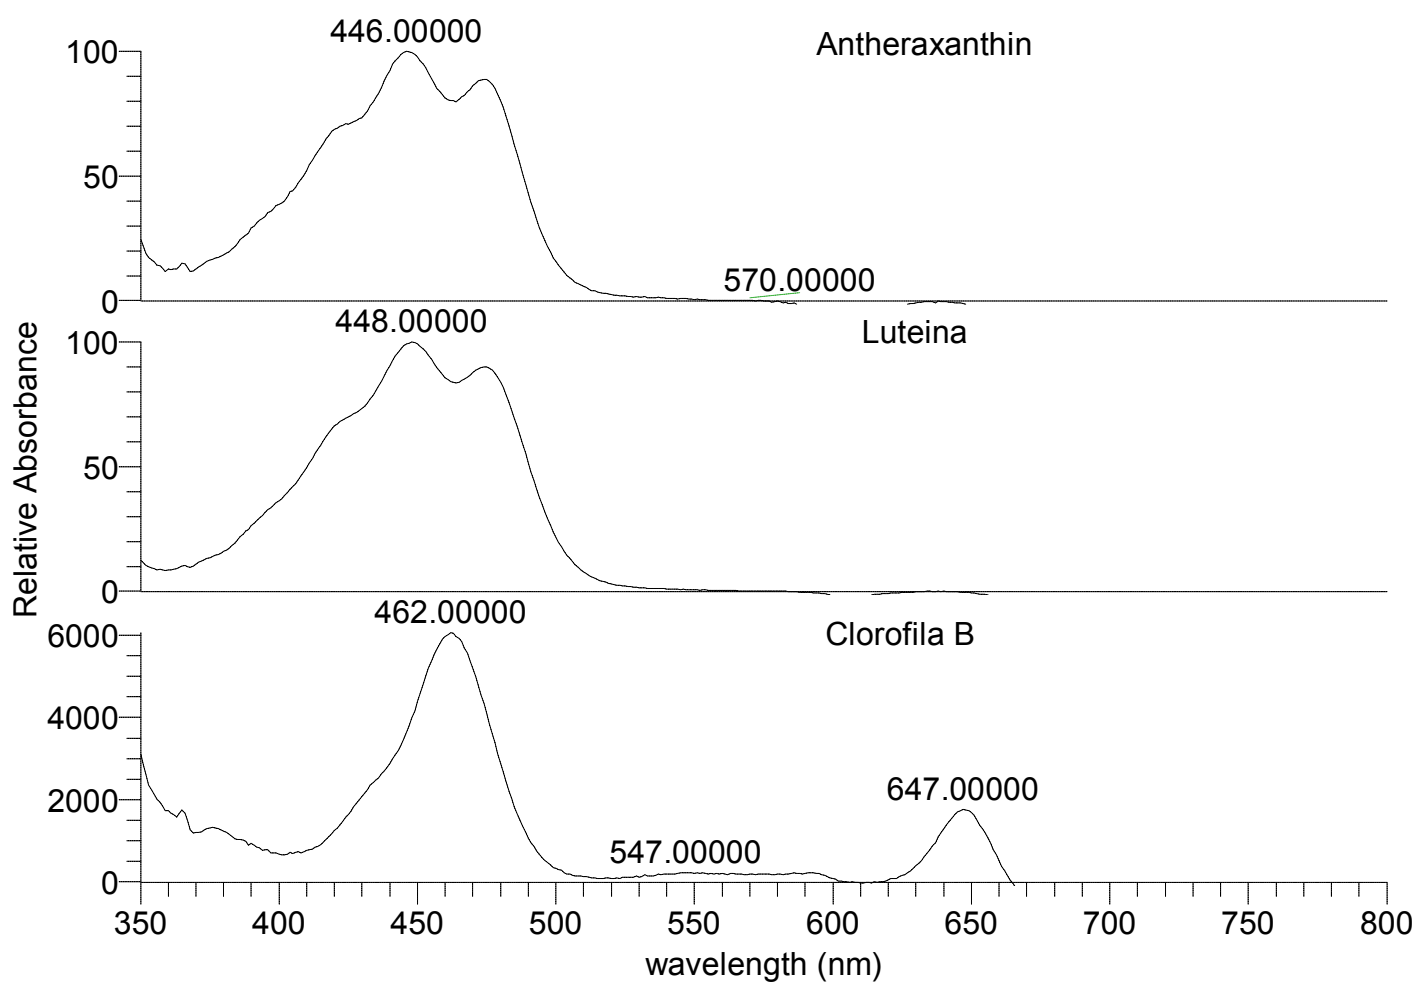

NL:  
6.97E3  
P4#6896  
RT: 22.99  
AV: 1

NL:  
1.89E4  
P4#7334  
RT: 24.45  
AV: 1

NL:  
6.05E3  
P4#9811  
RT: 32.70  
AV: 1

Supplement: Data_Sheet_1.zip [file P4_HPLC-UV_2.pdf › Carotenoids/Patrons/P4_HPLC-UV_2.pdf]

RT: 9.39 - 47.08

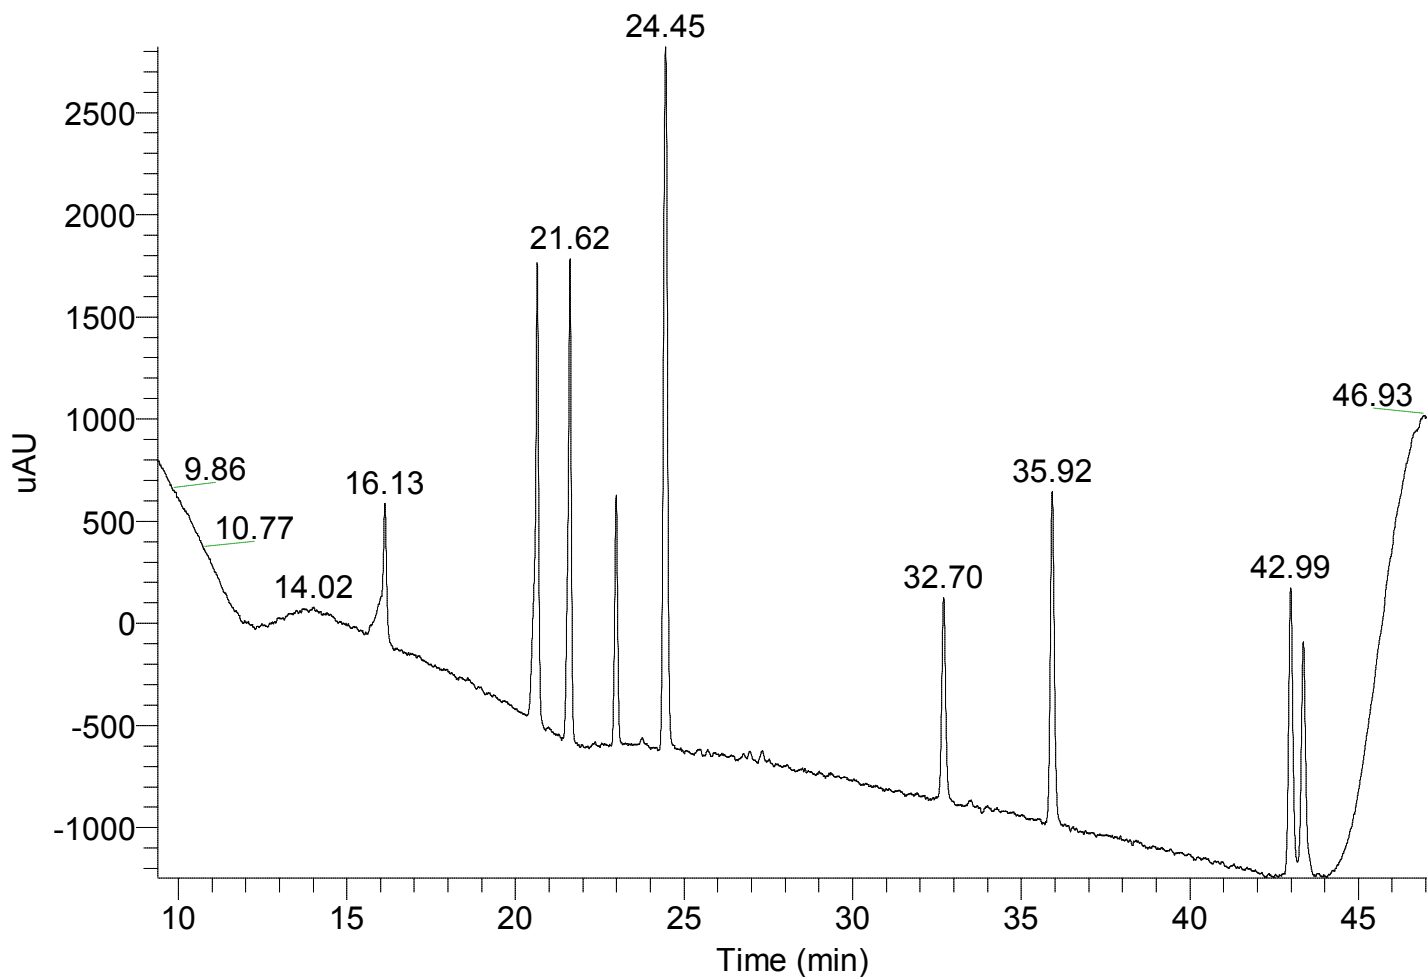

NL:  
2.82E3  
Total Scan  
PDA P4

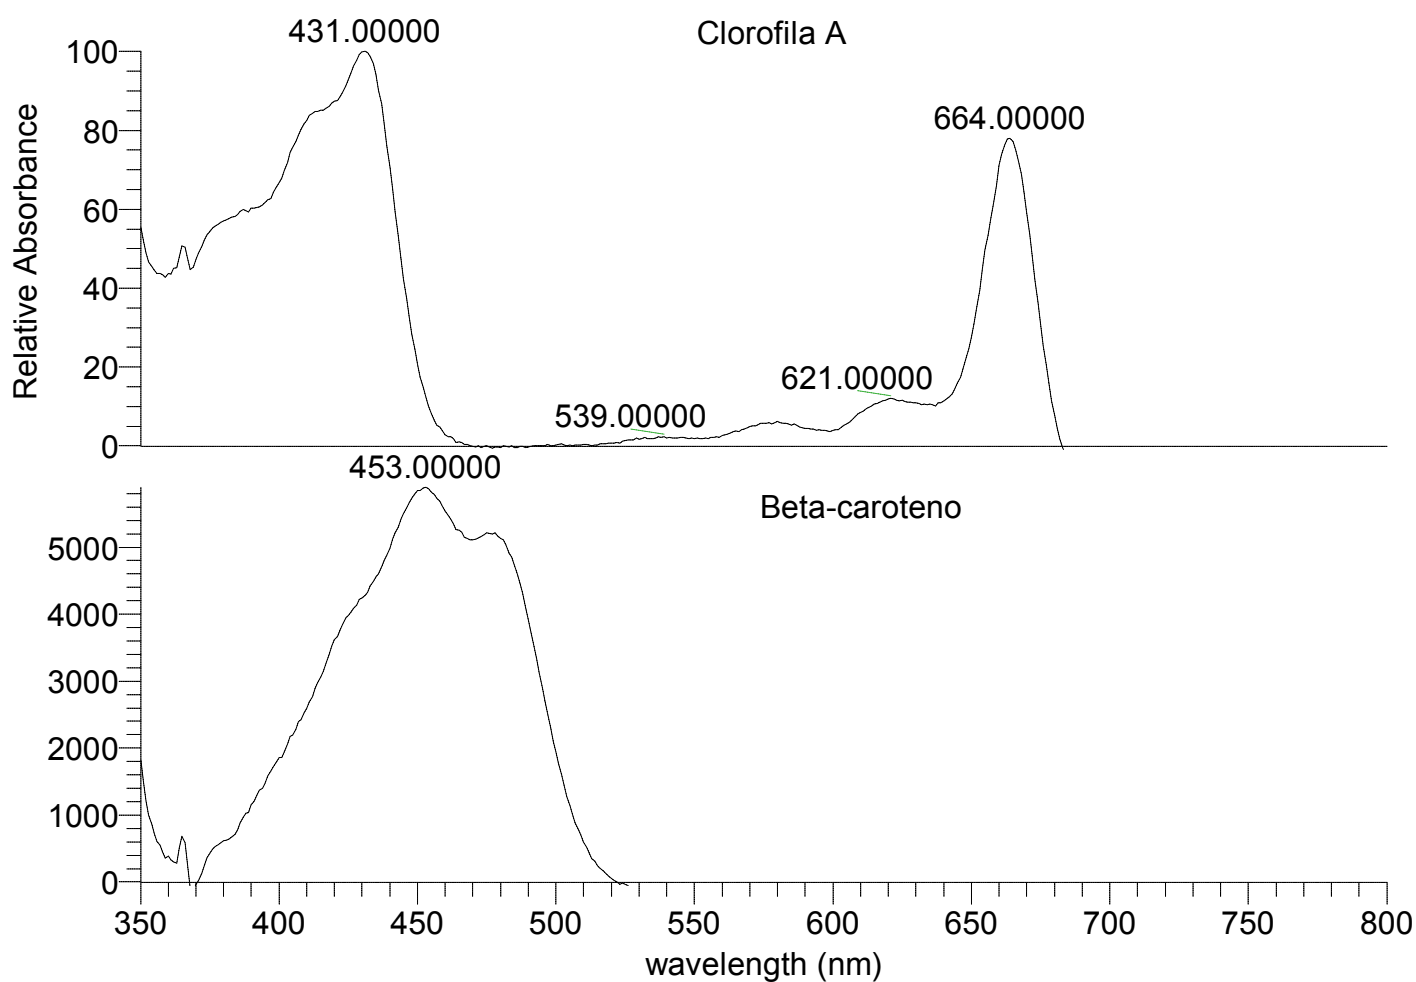

NL:  
7.13E3  
P4#10776  
RT: 35.92  
AV: 1

NL:  
5.89E3  
P4#13010  
RT: 43.37  
AV: 1

Supplement: Data_Sheet_1.zip [file P4_HPLC-UV_3.pdf › Carotenoids/Patrons/P4_HPLC-UV_3.pdf]

RT: 14.83 - 37.78

NL:  
9.76E2  
Total Scan  
PDA  
P2\_zea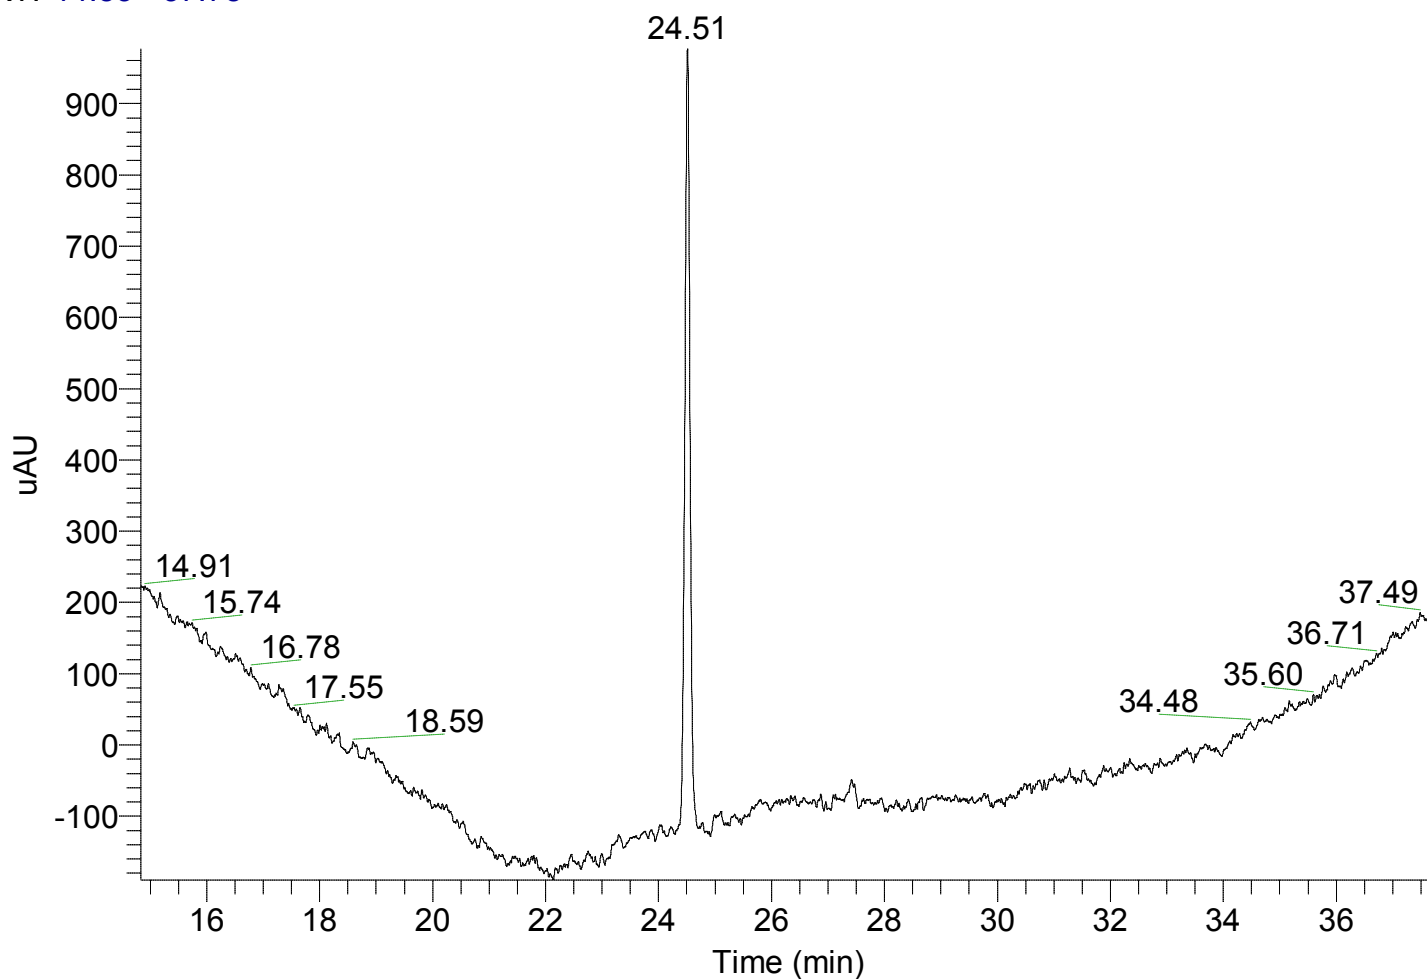

P2\_zea #7354 RT: 24.51 AV: 1 NL: 6.49E3 microAU

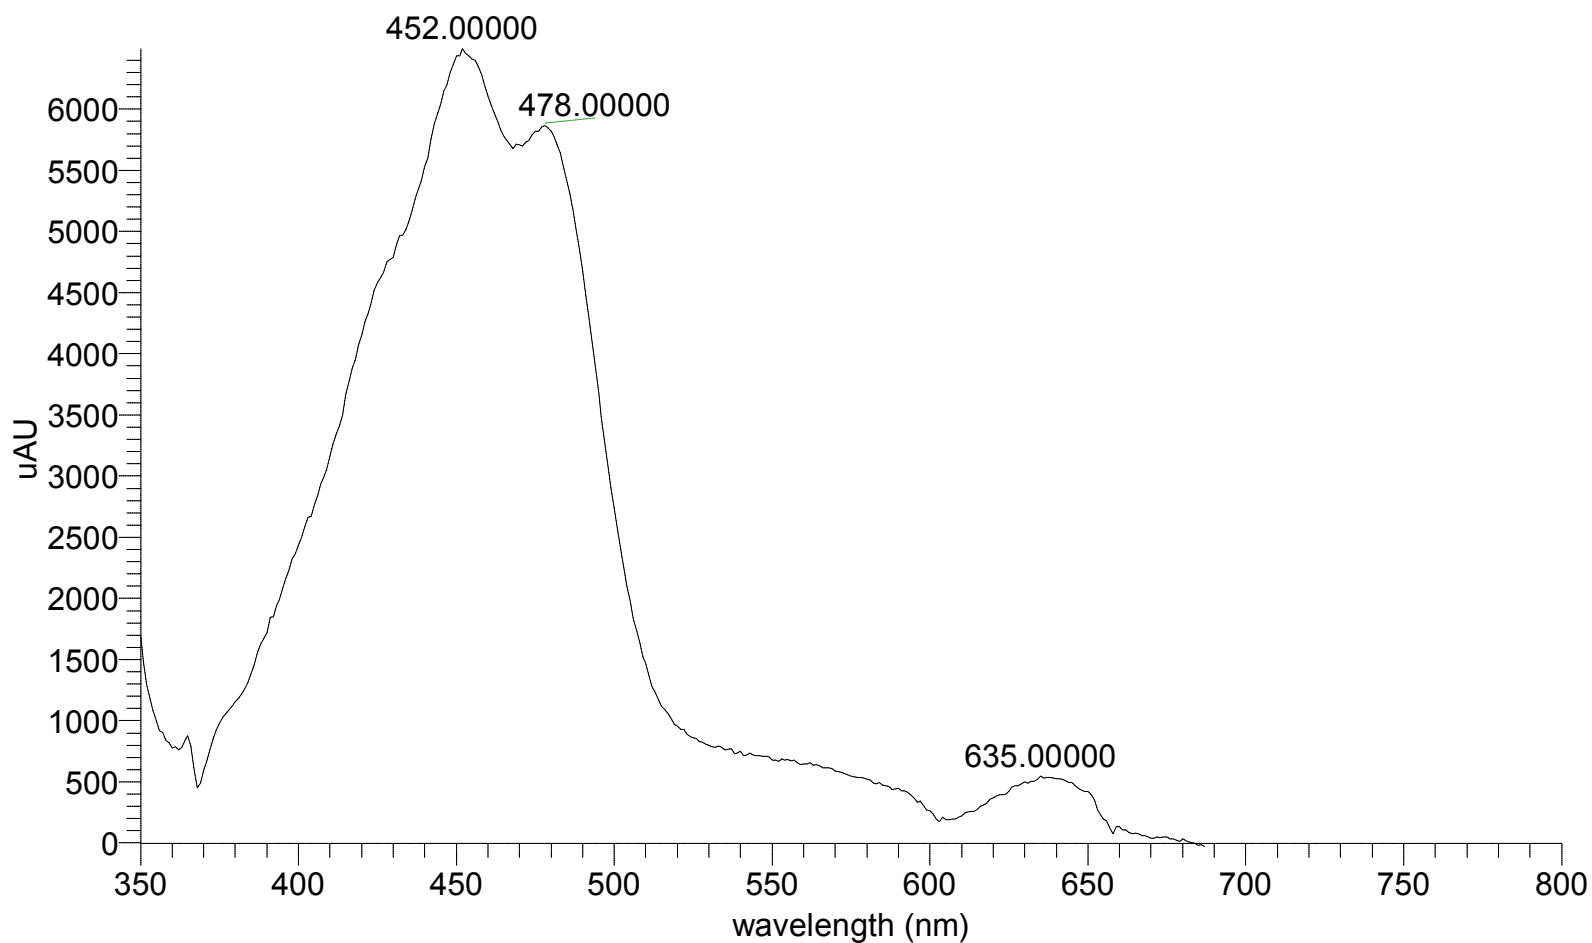

Supplement: Data_Sheet_1.zip [file Zeaxanthina_HPLC-UV-VIS.pdf › Carotenoids/Patrons/Zeaxanthina_HPLC-UV-VIS.pdf]

RT: 22.04 - 32.82

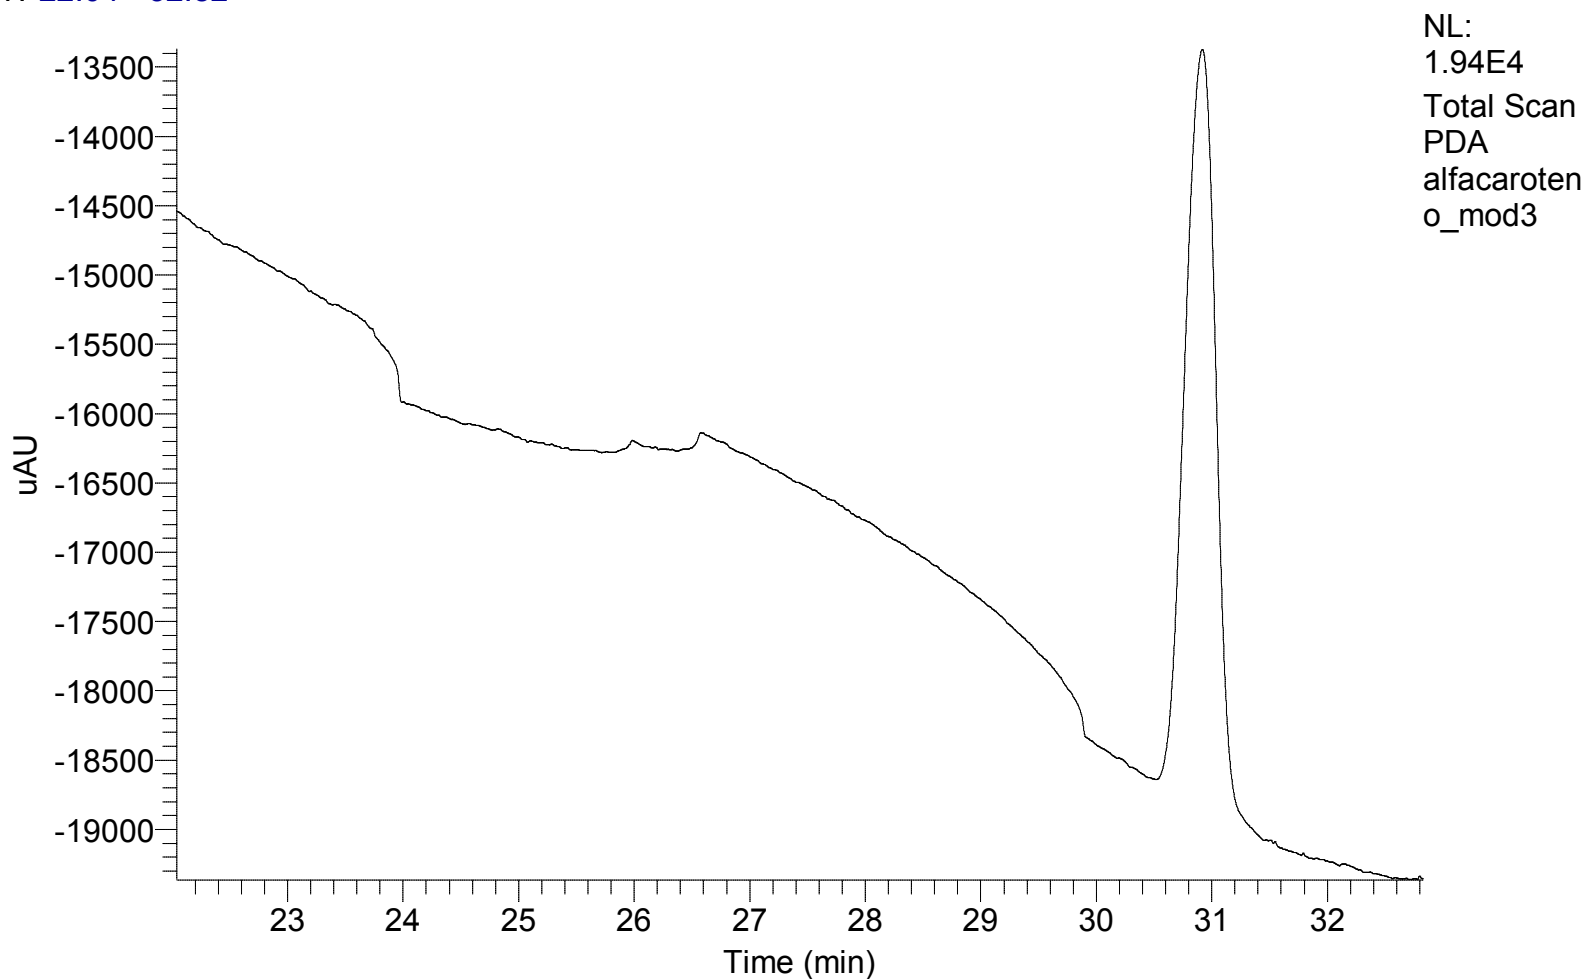

alfacaroteno\_mod3 #18544 RT: 30.91 AV: 1 NL: 2.09E4 microAU

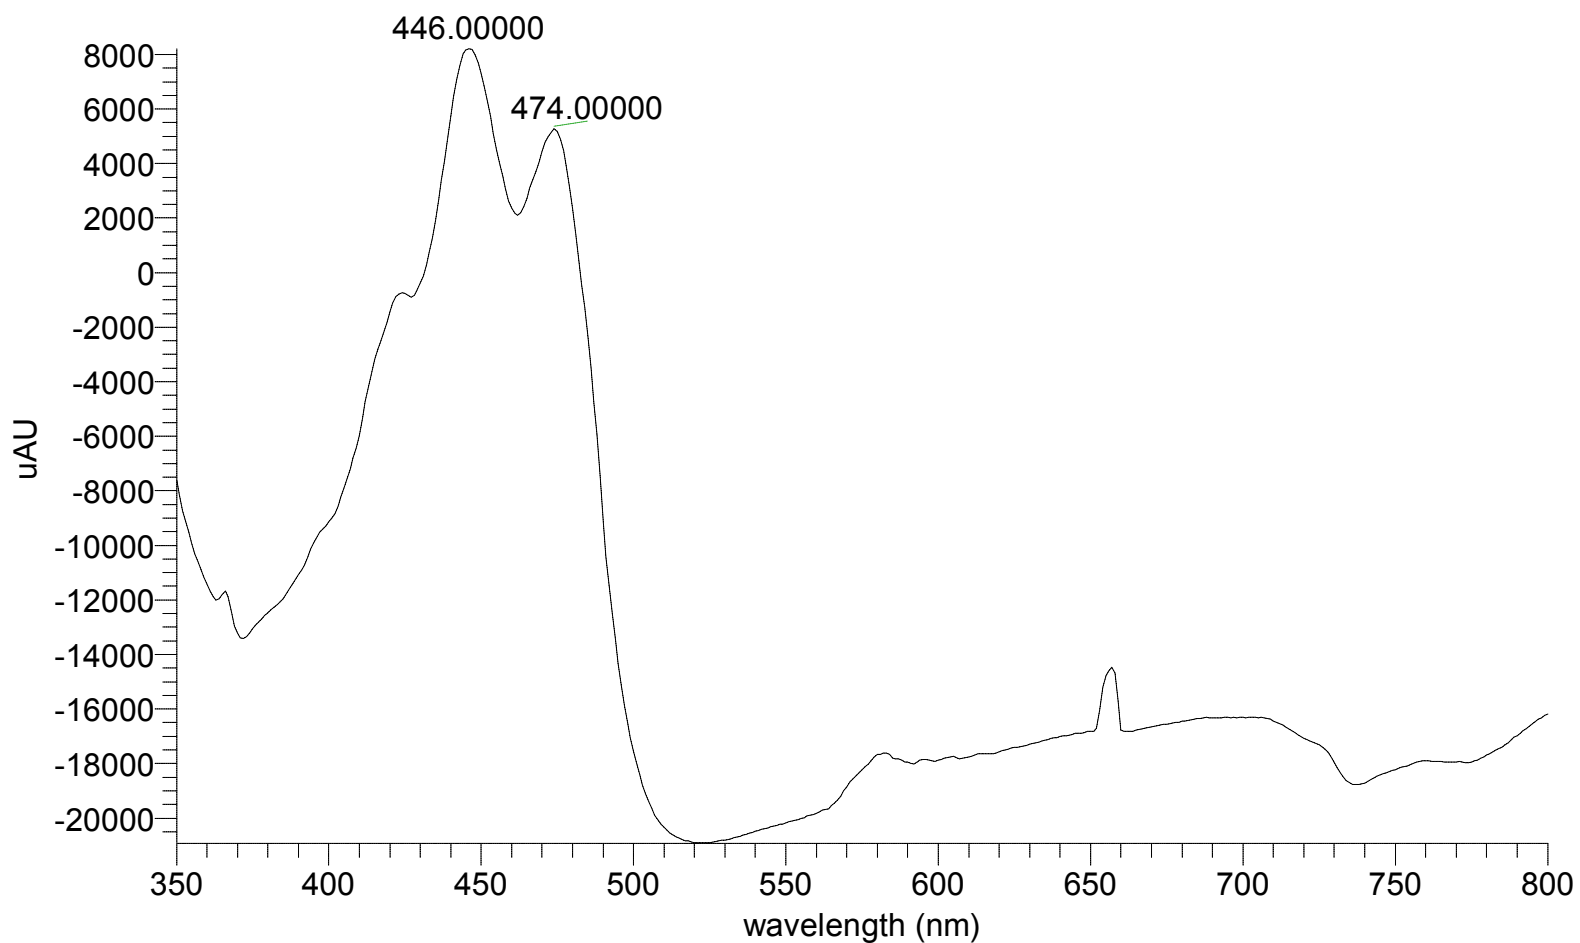

Supplement: Data_Sheet_1.zip [file alfacaroteno_HPLC-UV-VIS.pdf › Carotenoids/Patrons/alfacaroteno_HPLC-UV-VIS.pdf]
